# Supplementary material for: Biomechanical properties of a buzz-pollinated flower
Source: PubMed Central journal article supplement (PMC7540744; doi:10.1098/rsos.201010), 2020-09-16

Vel. = 0.014 ; Str. = Corolla ; Axis = x ; Fl. accession = 10-s-81-1AA

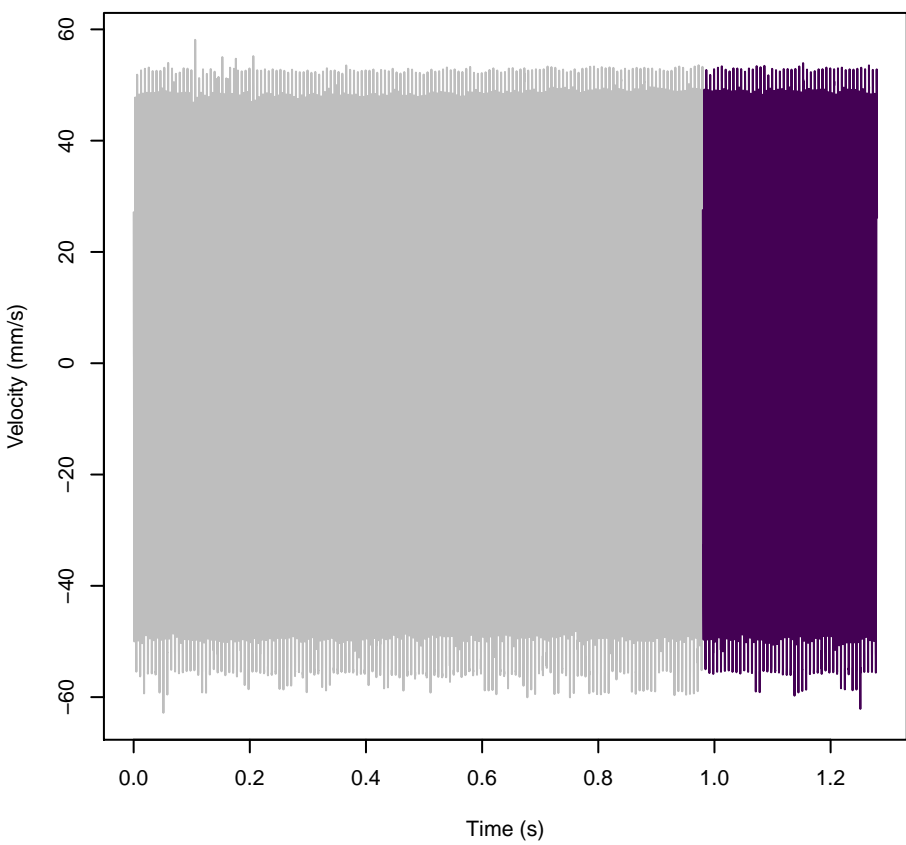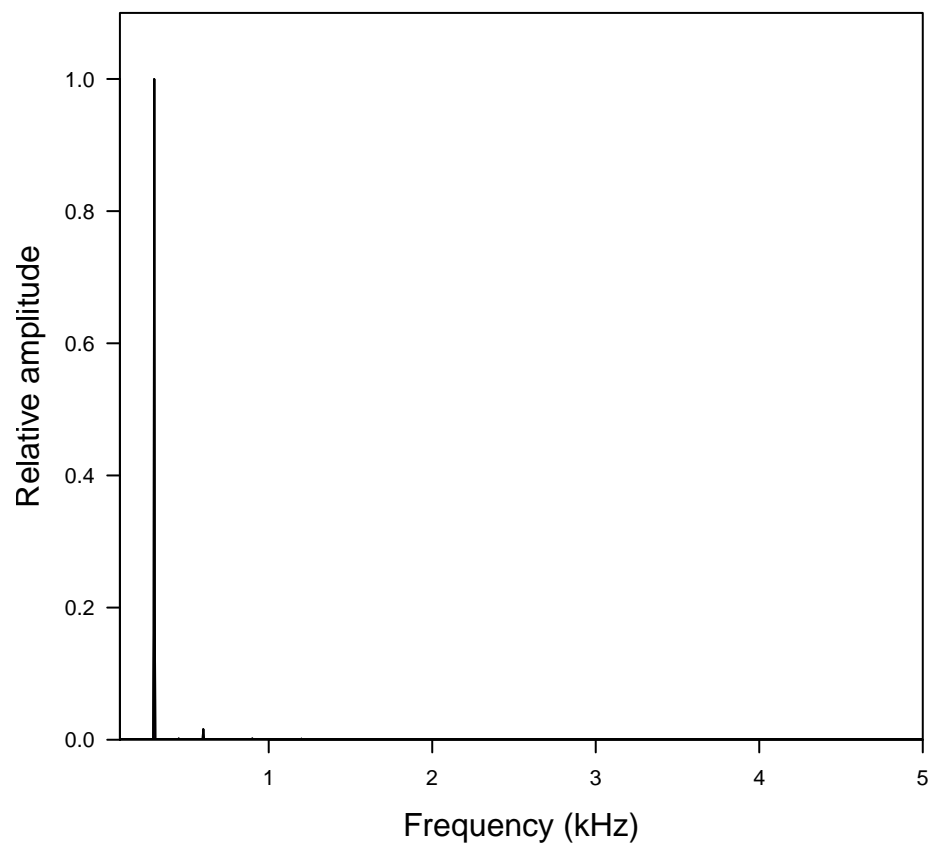

Vel. = 0.014 ; Str. = Receptacle ; Axis = x ; Fl. accession = 10-s-81-1AA

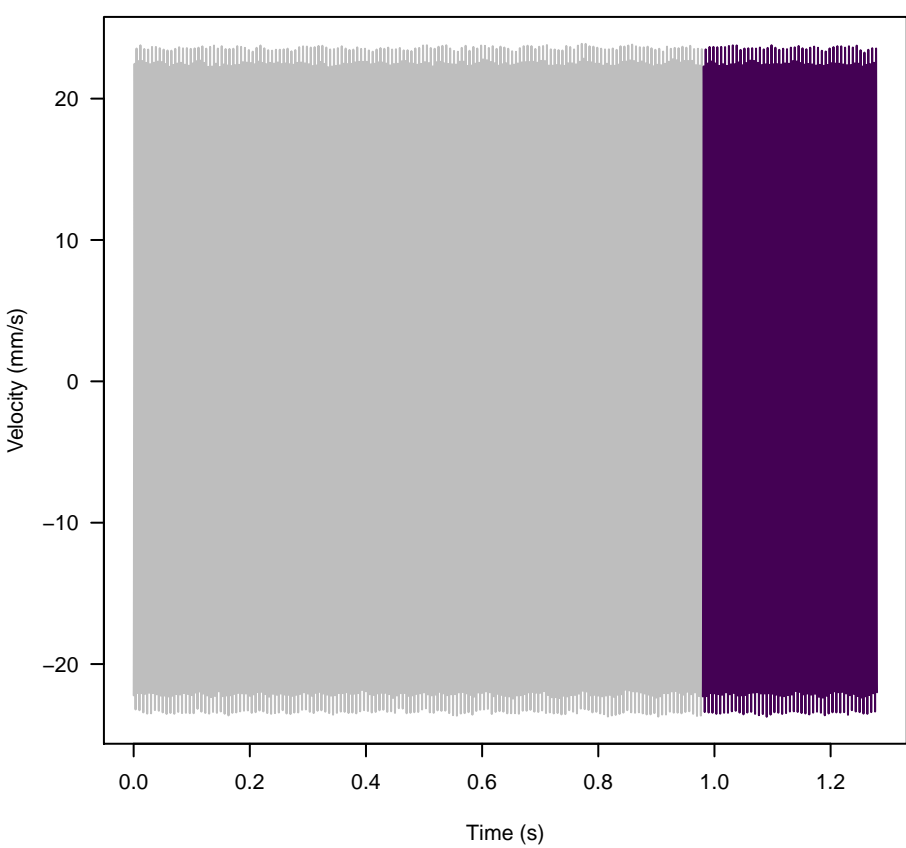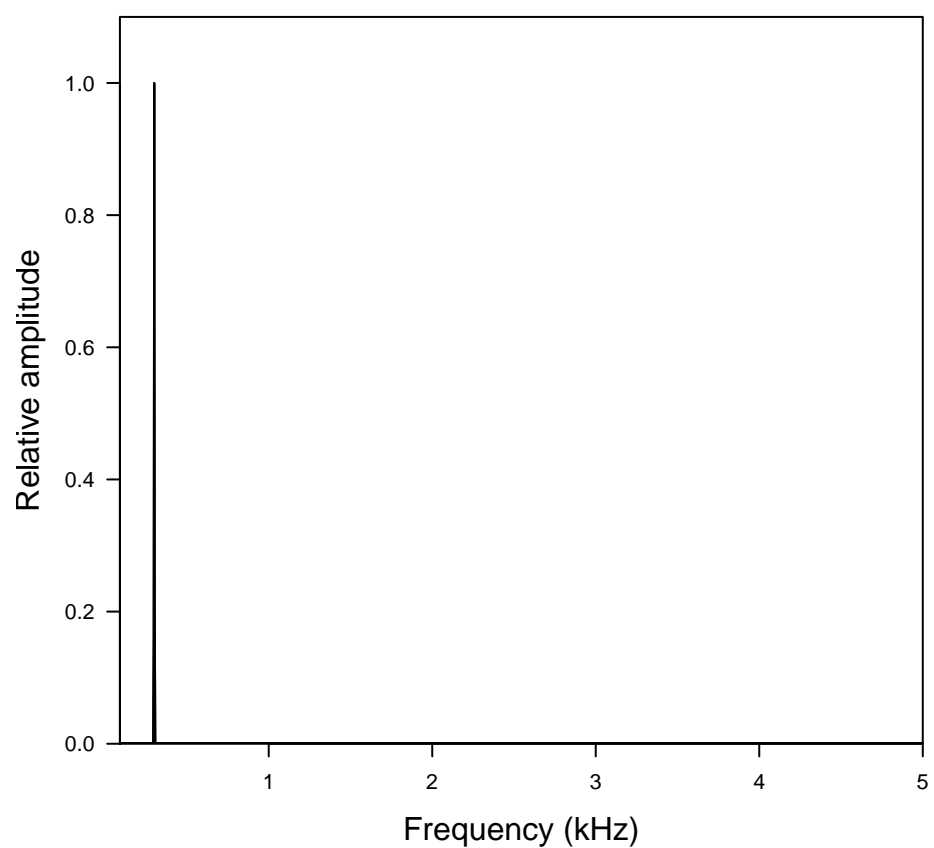

Vel. = 0.014 ; Str. = FA ; Axis = x ; Fl. accession = 10-s-81-1AA

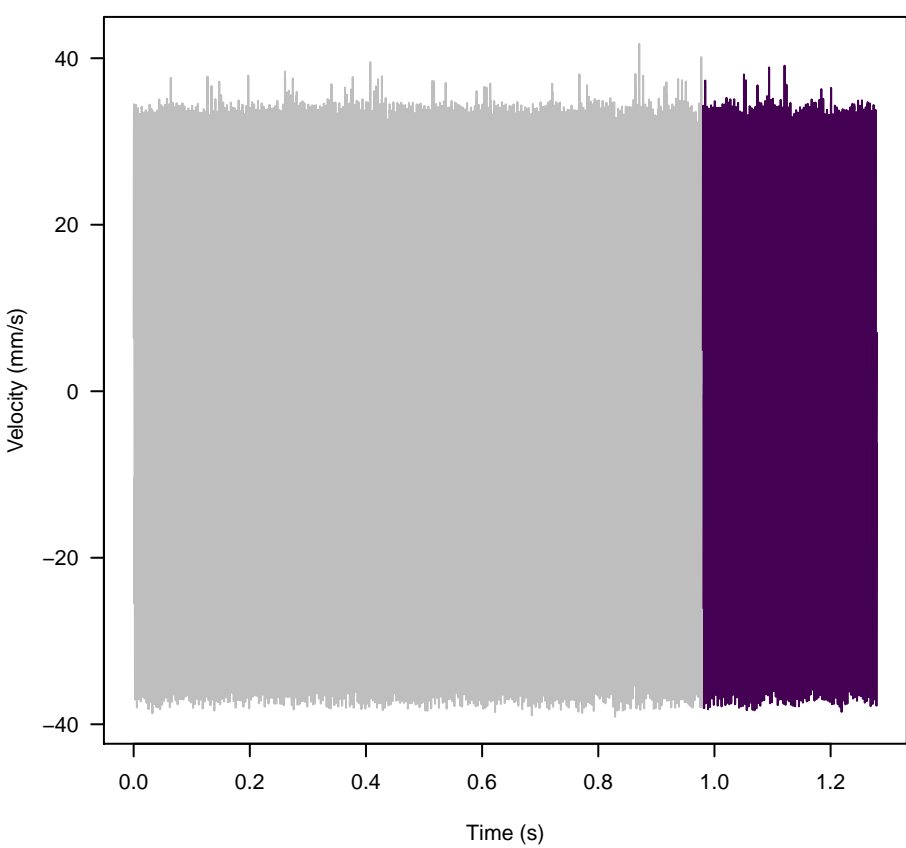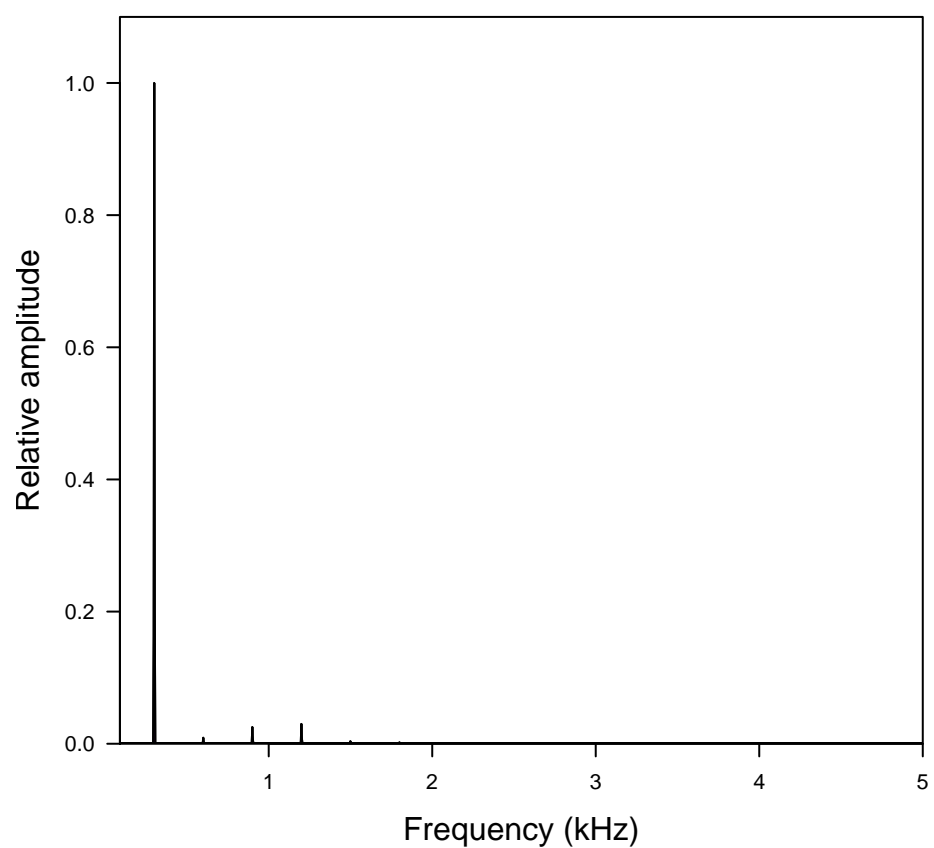

Vel. = 0.014 ; Str. = Receptacle ; Axis = x ; Fl. accession = 10-s-81-1AA

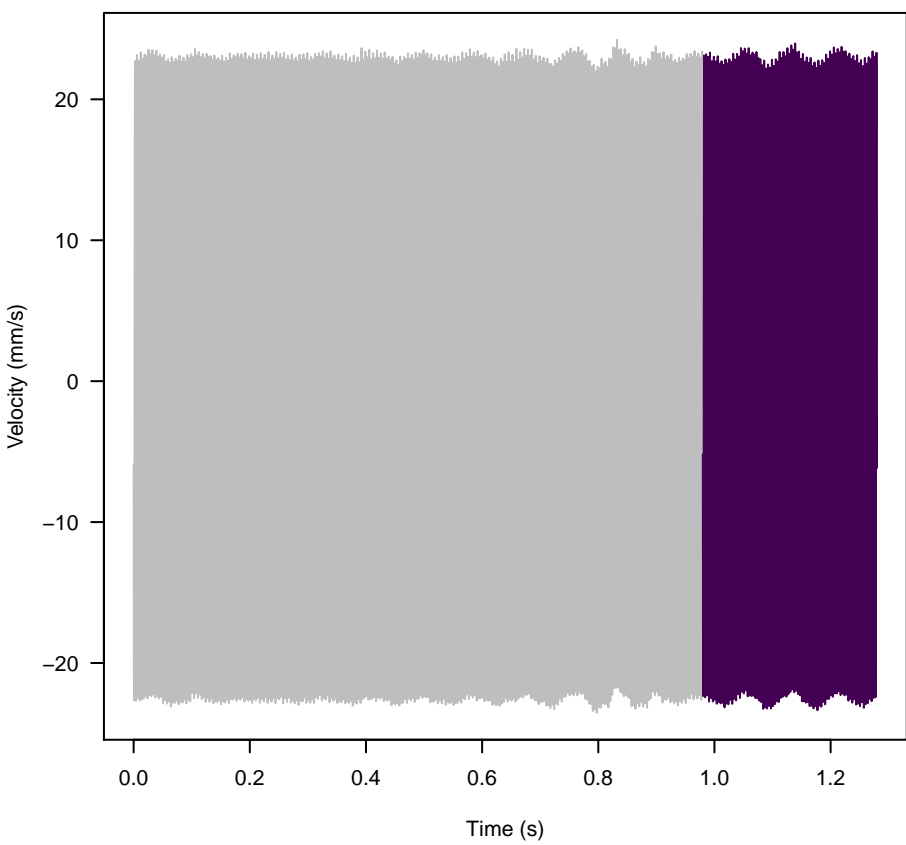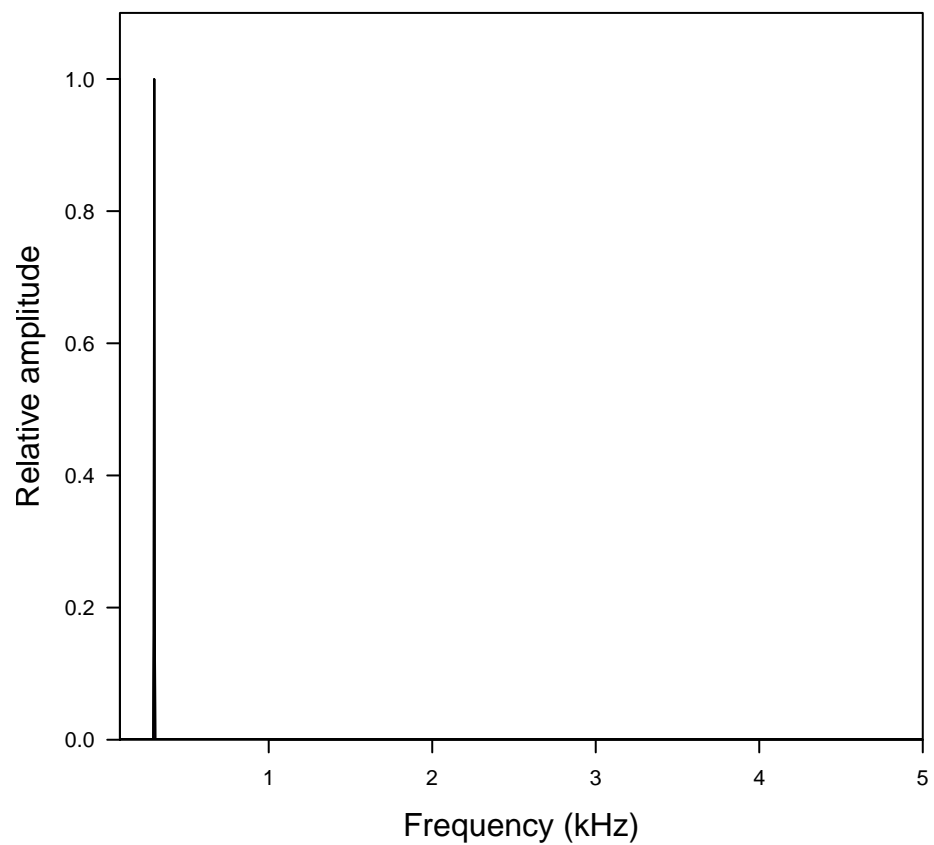

Vel. = 0.014 ; Str. = PA ; Axis = x ; Fl. accession = 10-s-81-1AA

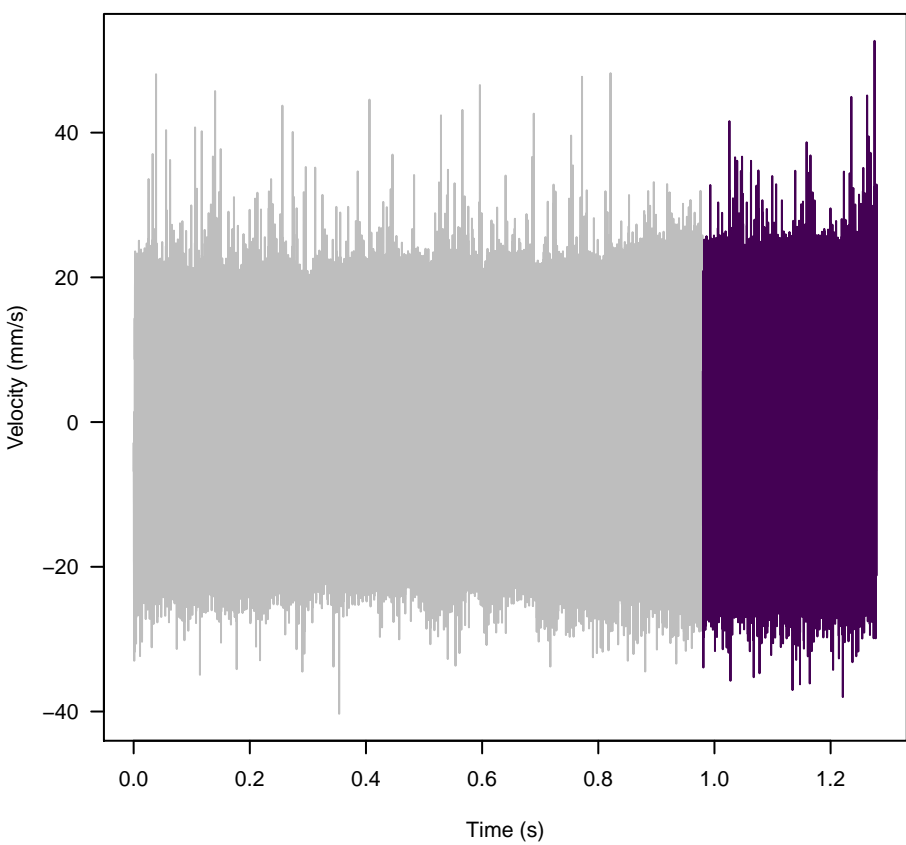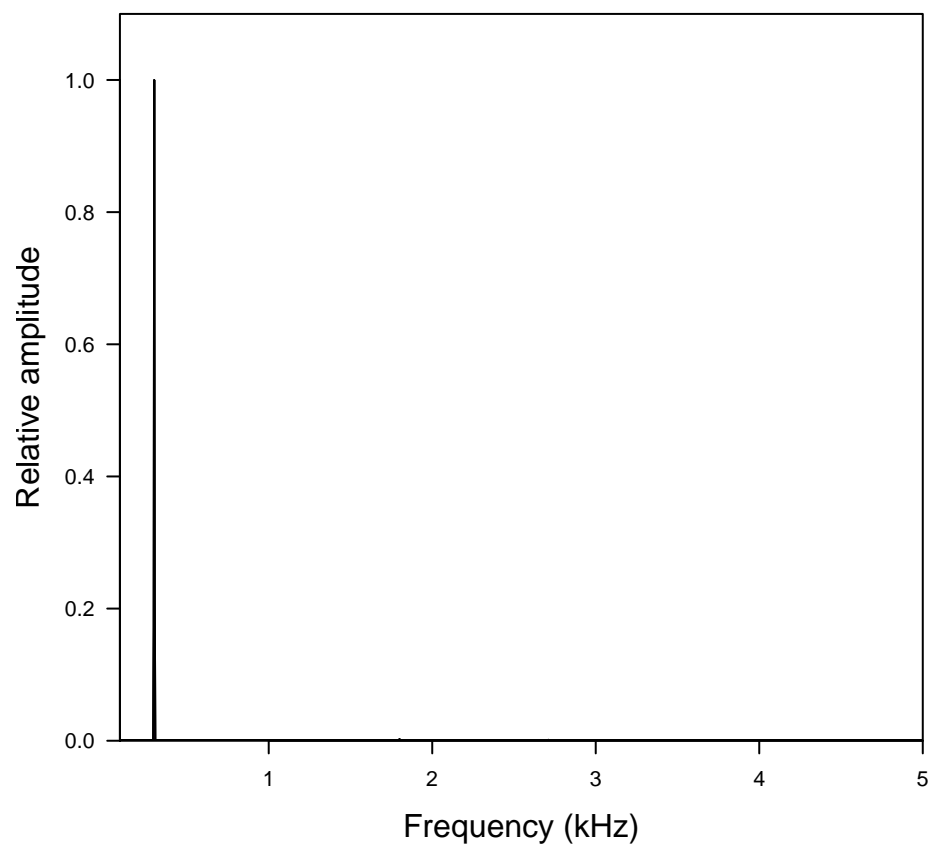

Vel. = 0.014 ; Str. = Receptacle ; Axis = x ; Fl. accession = 10-s-81-1AA

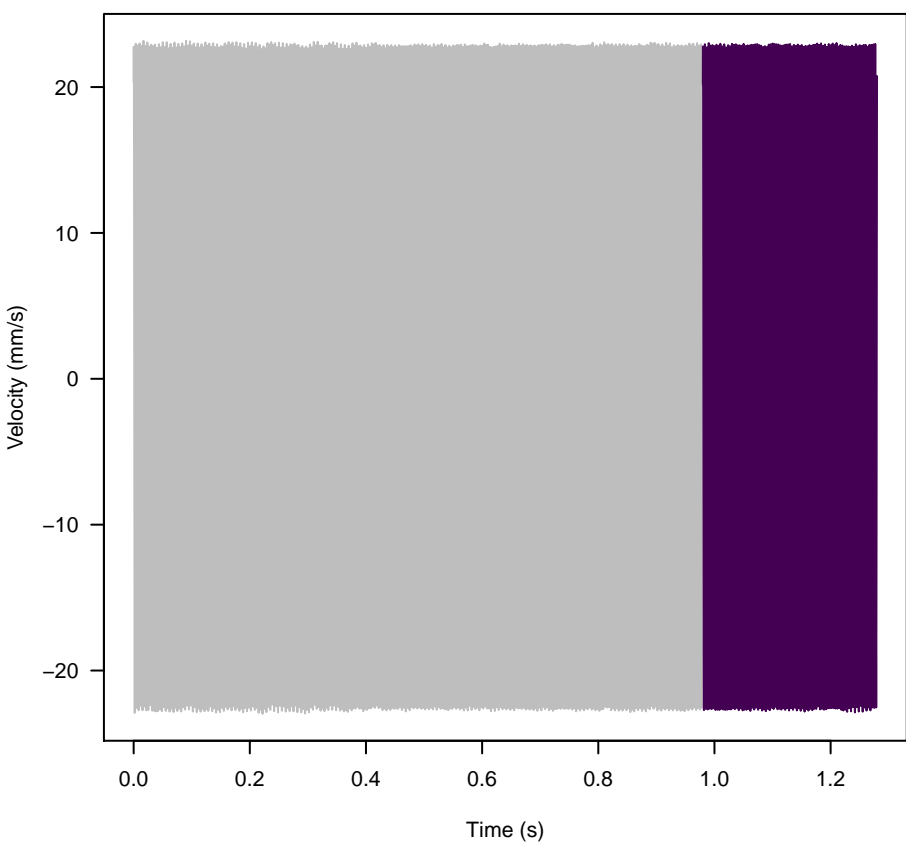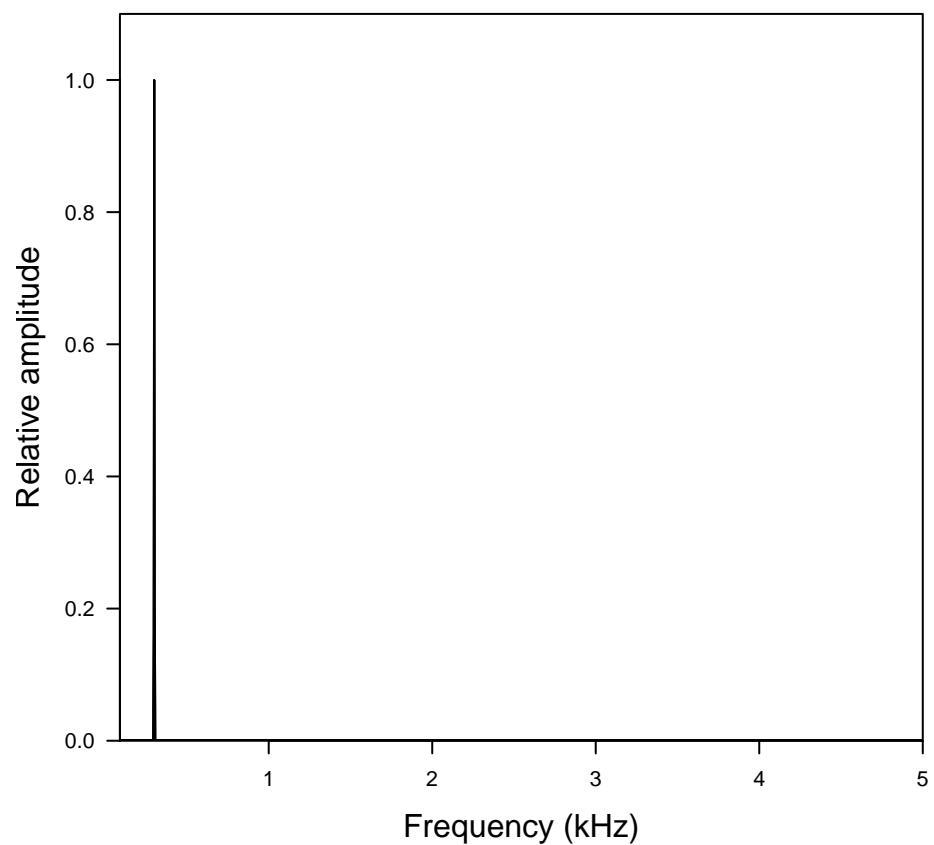

Vel. = 0.028 ; Str. = PA ; Axis = x ; Fl. accession = 10-s-81-1AA

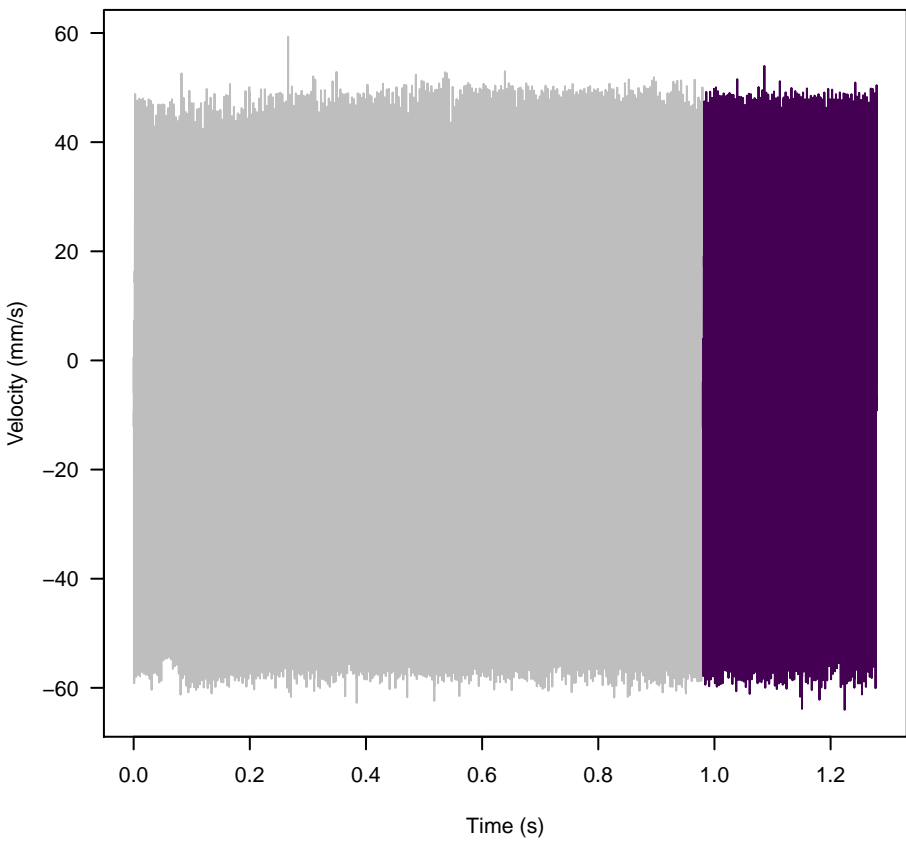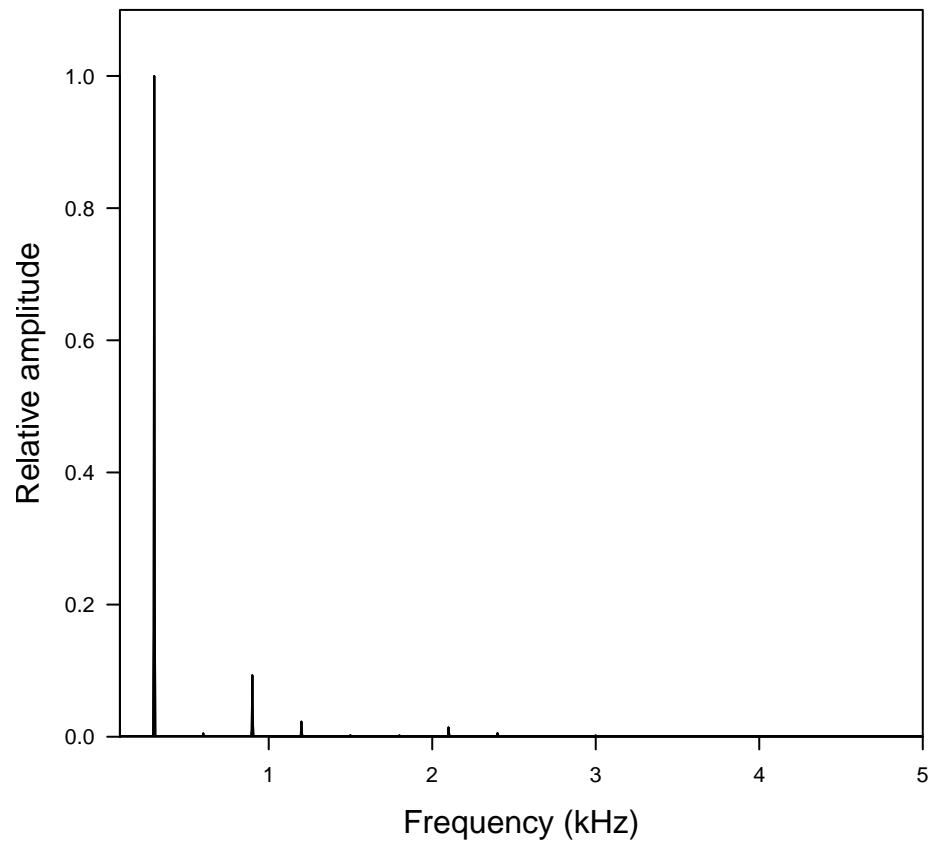

Vel. = 0.028 ; Str. = Receptacle ; Axis = x ; Fl. accession = 10-s-81-1AA

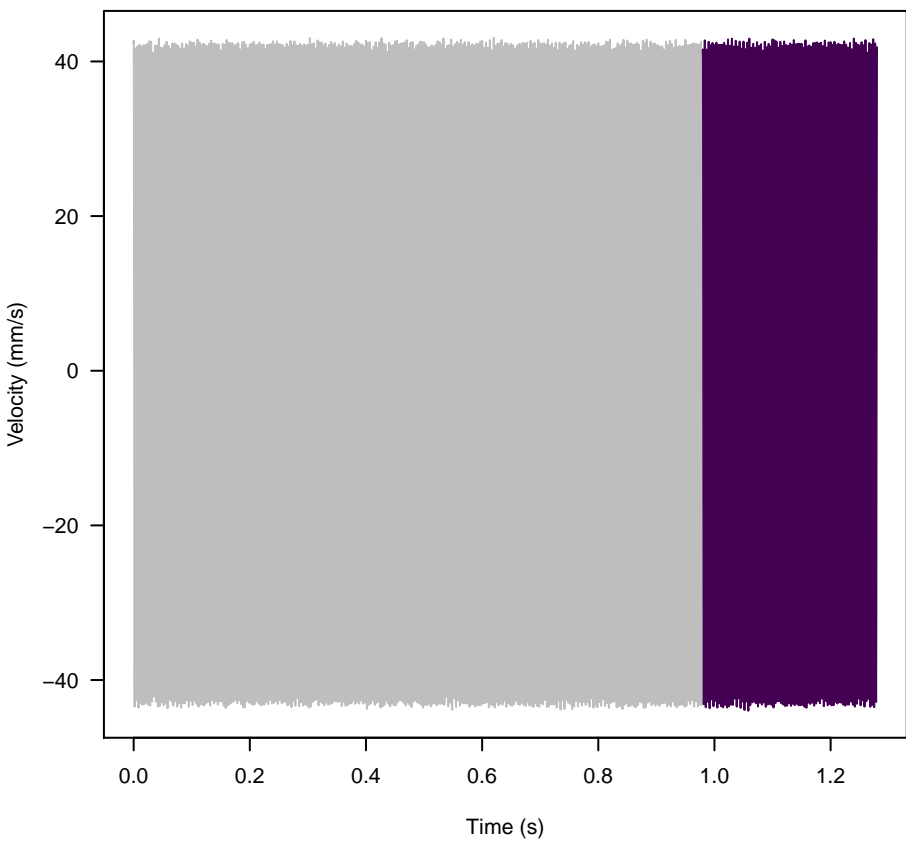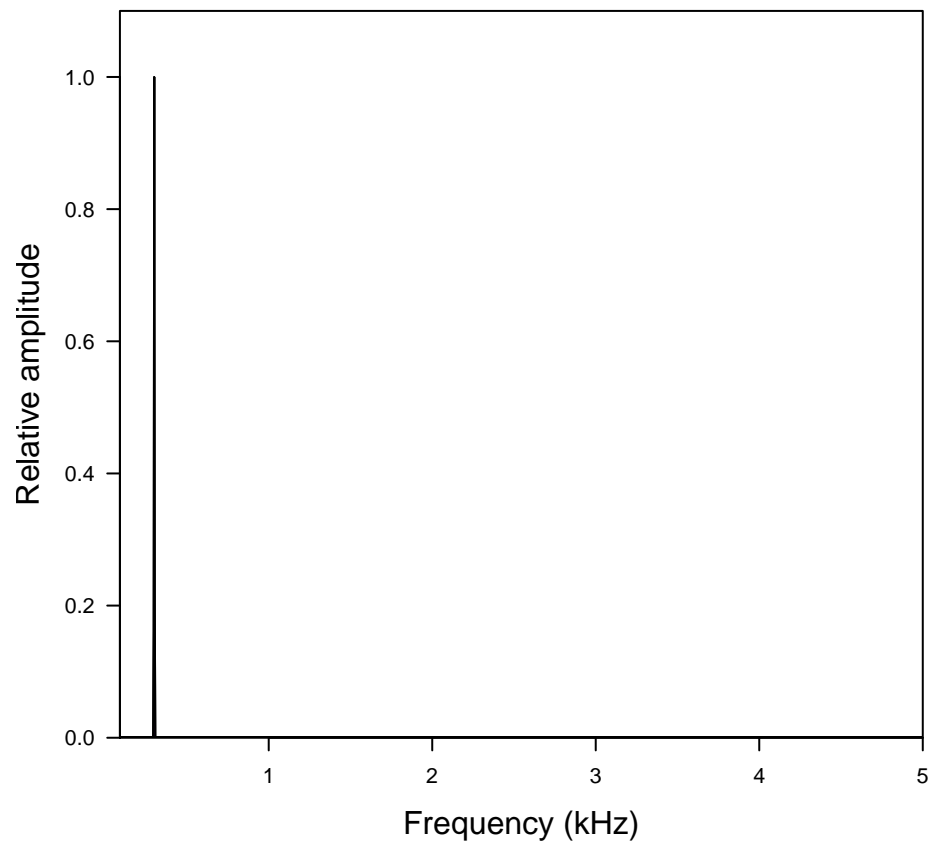

Vel. = 0.028 ; Str. = FA ; Axis = x ; Fl. accession = 10-s-81-1AA

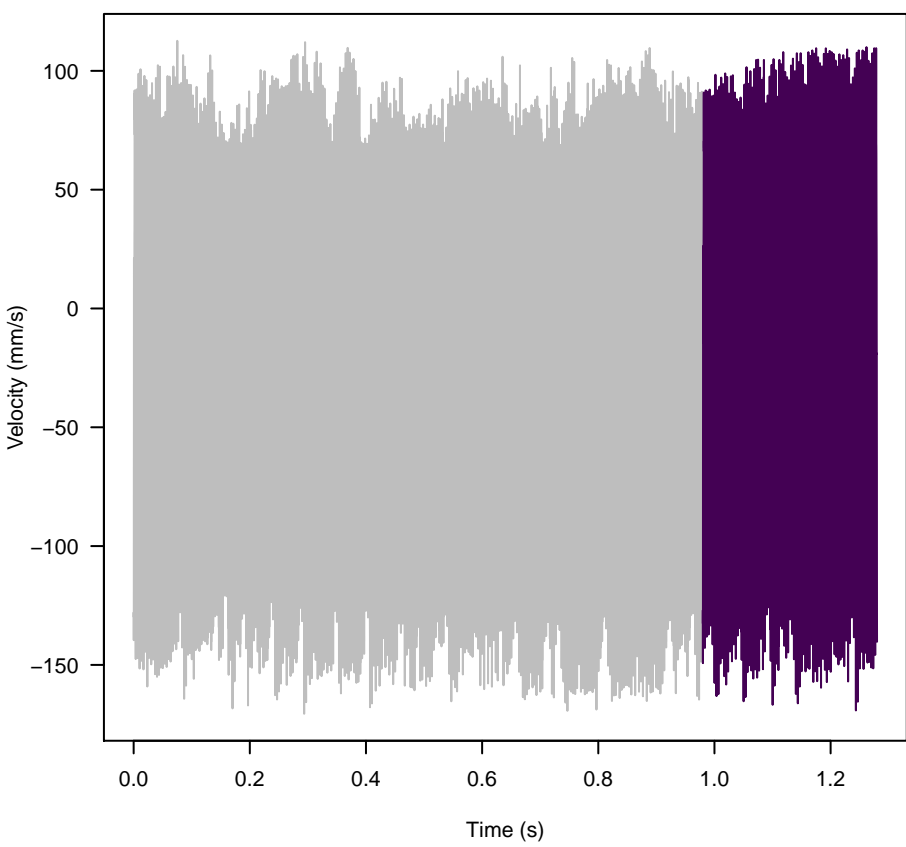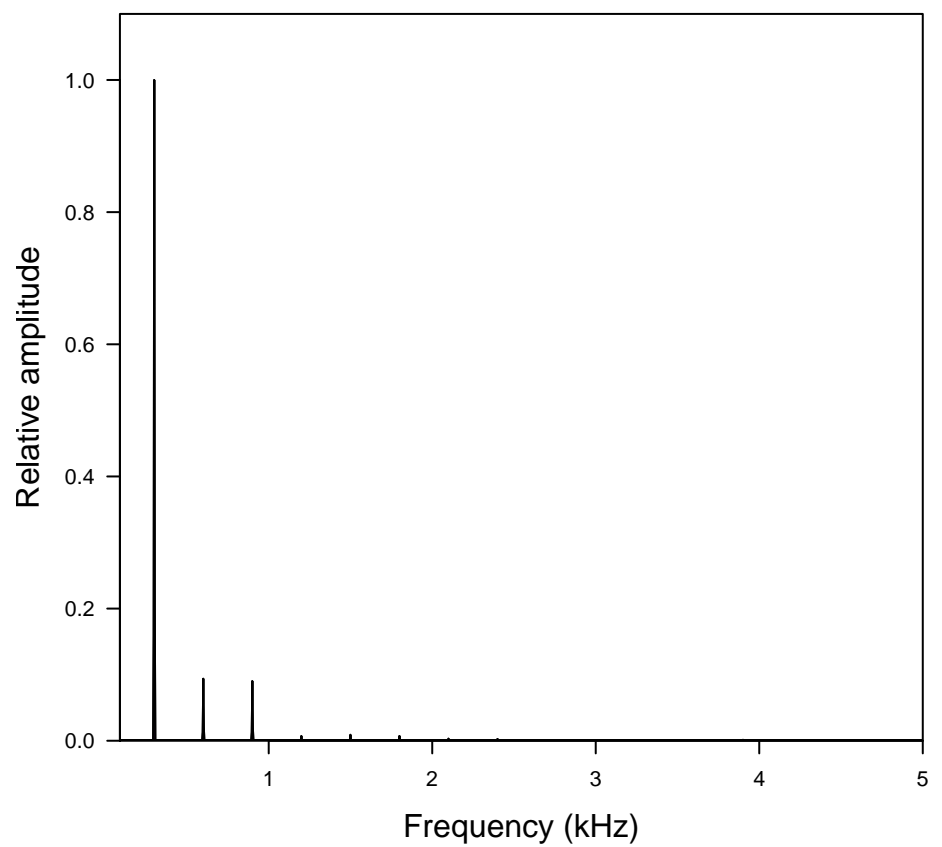

Vel. = 0.028 ; Str. = Receptacle ; Axis = x ; Fl. accession = 10-s-81-1AA

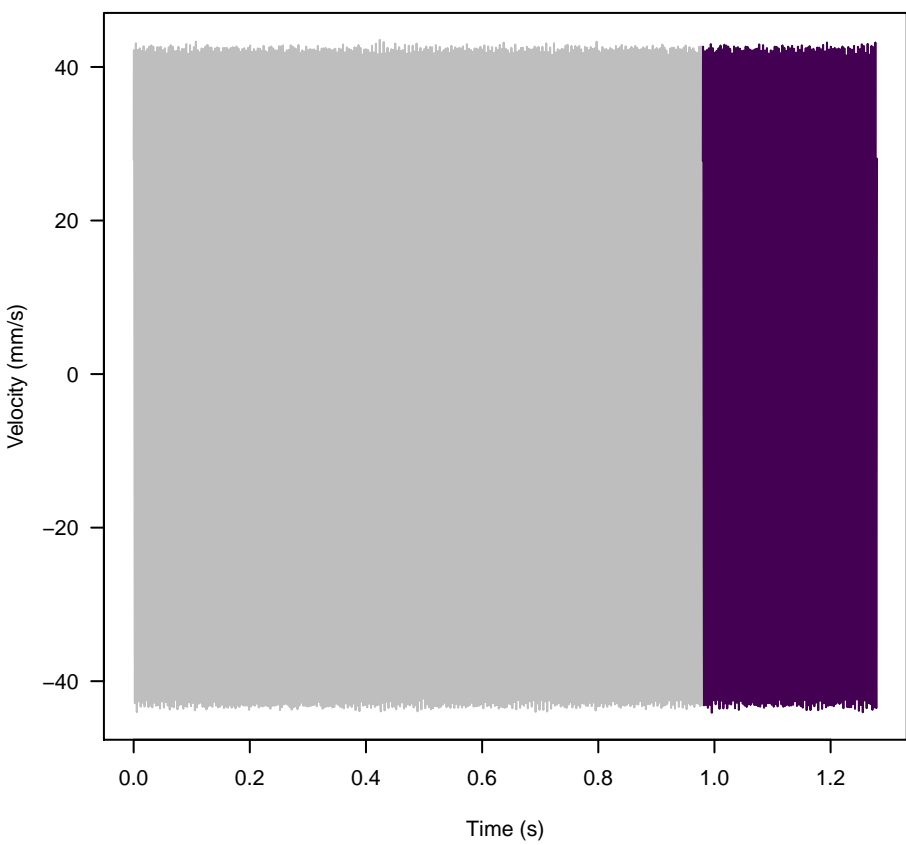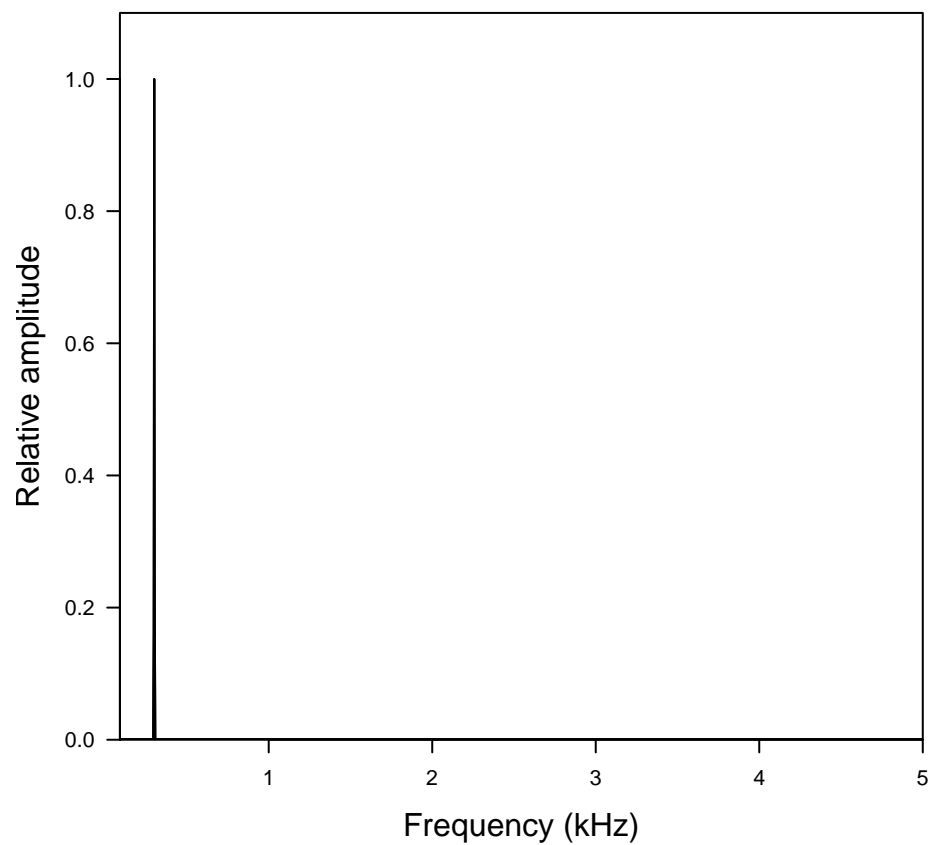

Vel. = 0.028 ; Str. = Corolla ; Axis = x ; Fl. accession = 10-s-81-1AA

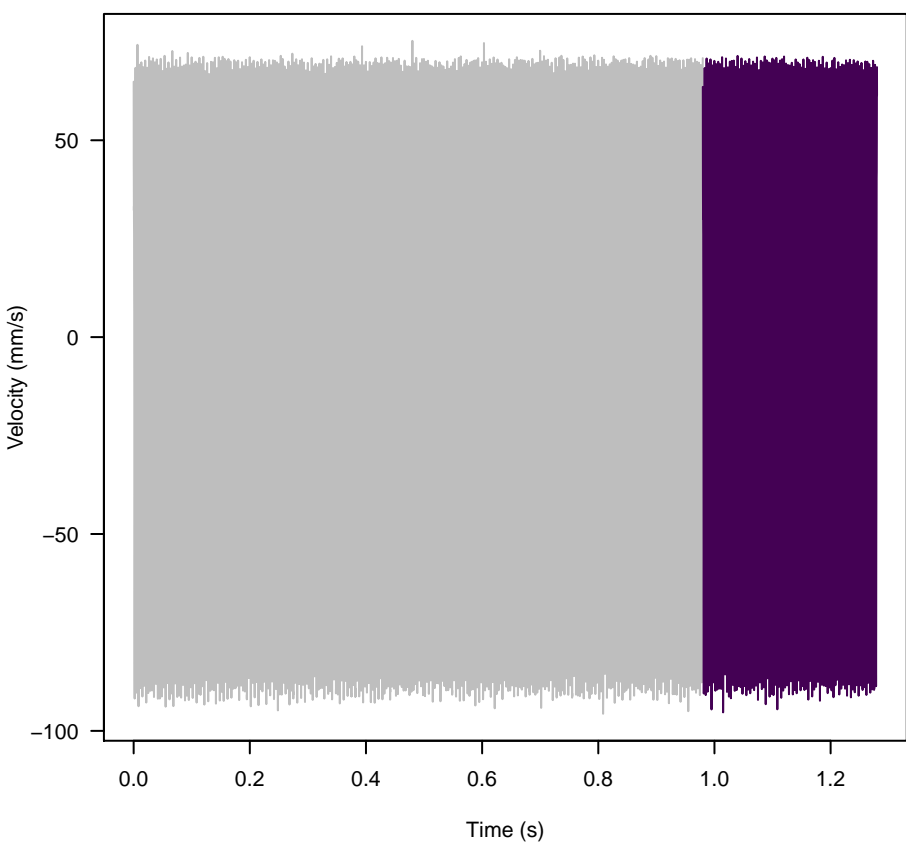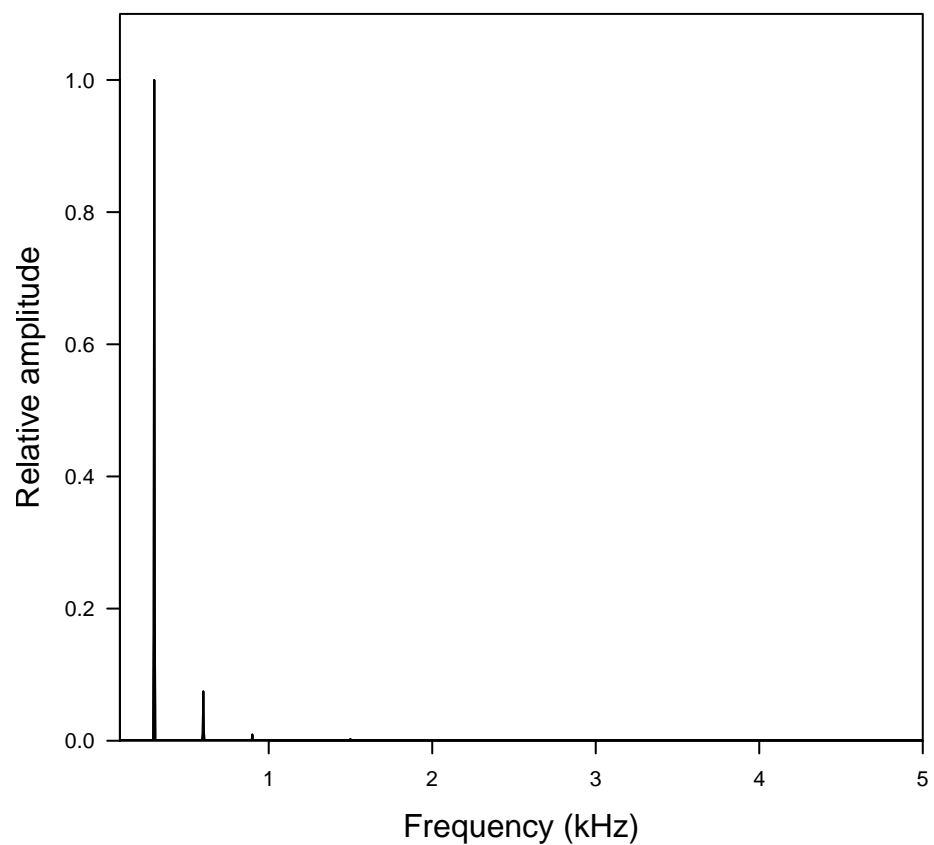

Vel. = 0.028 ; Str. = Receptacle ; Axis = x ; Fl. accession = 10-s-81-1AA

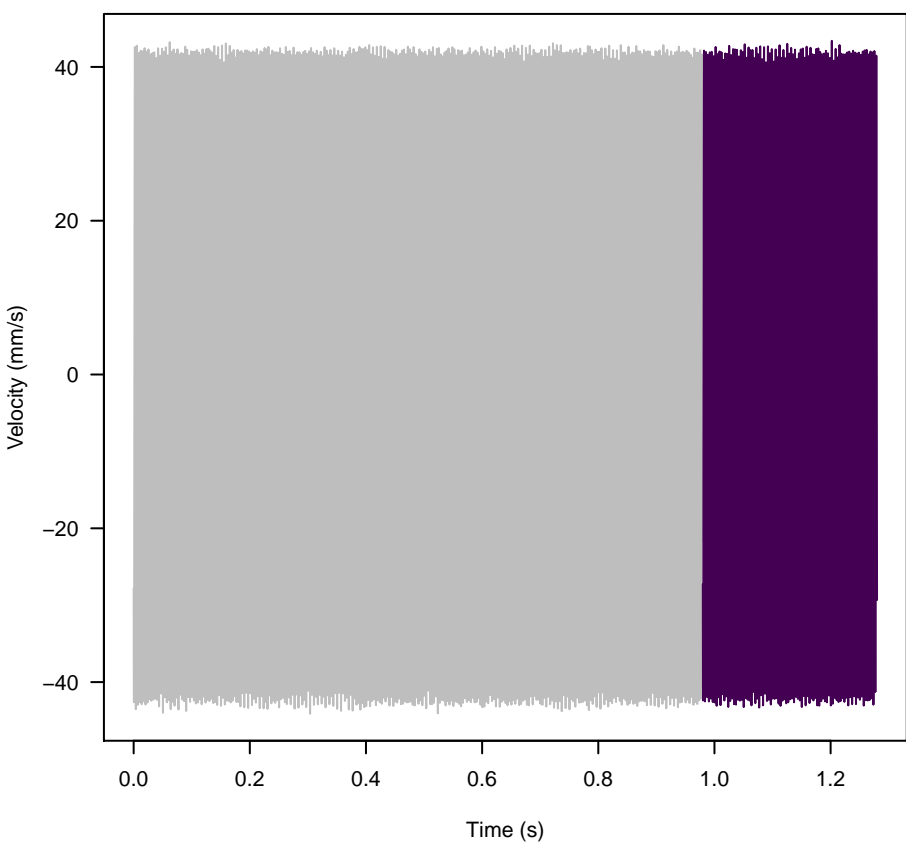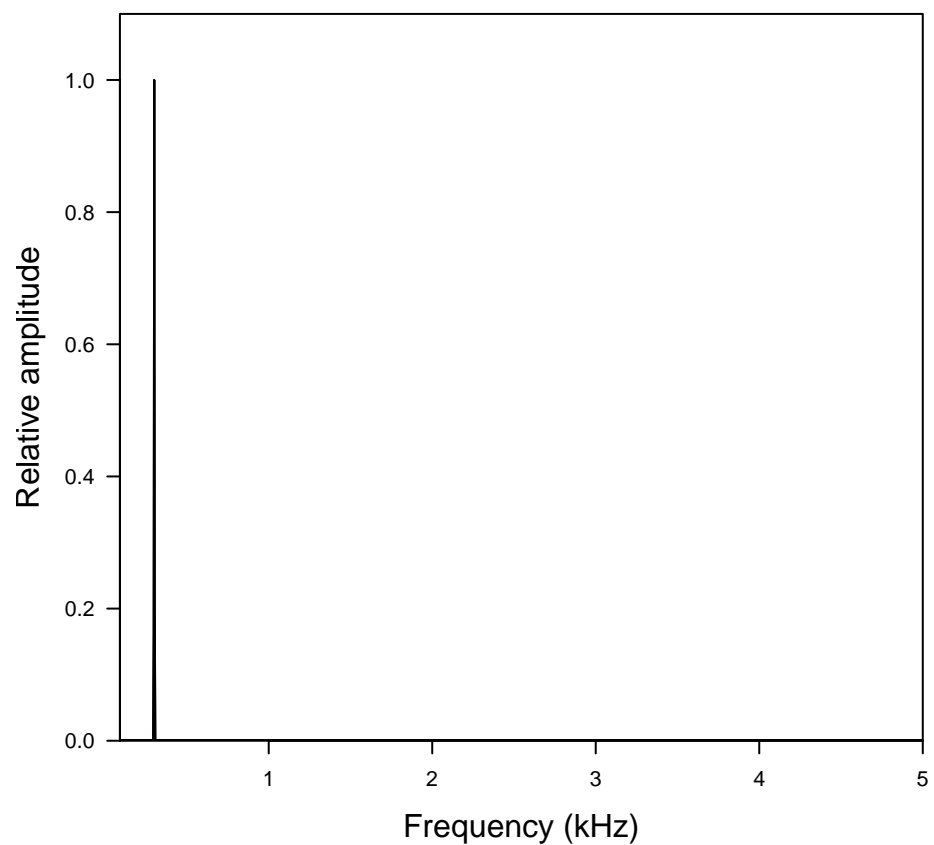

Vel. = 0.057 ; Str. = Corolla ; Axis = x ; Fl. accession = 10-s-81-1AA

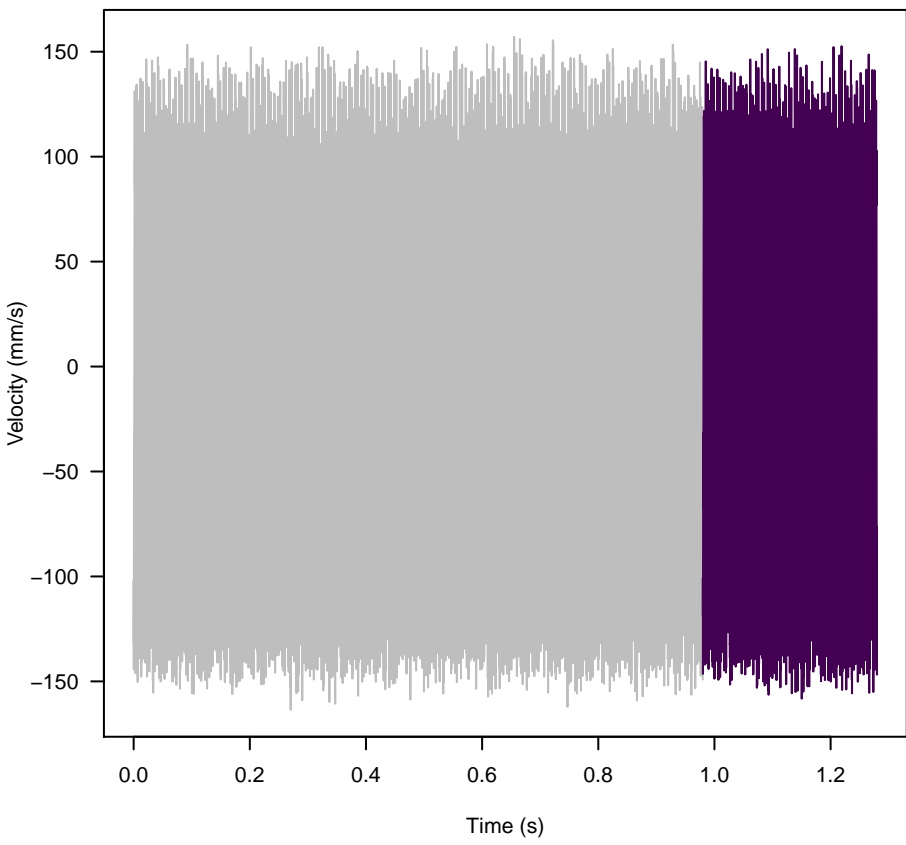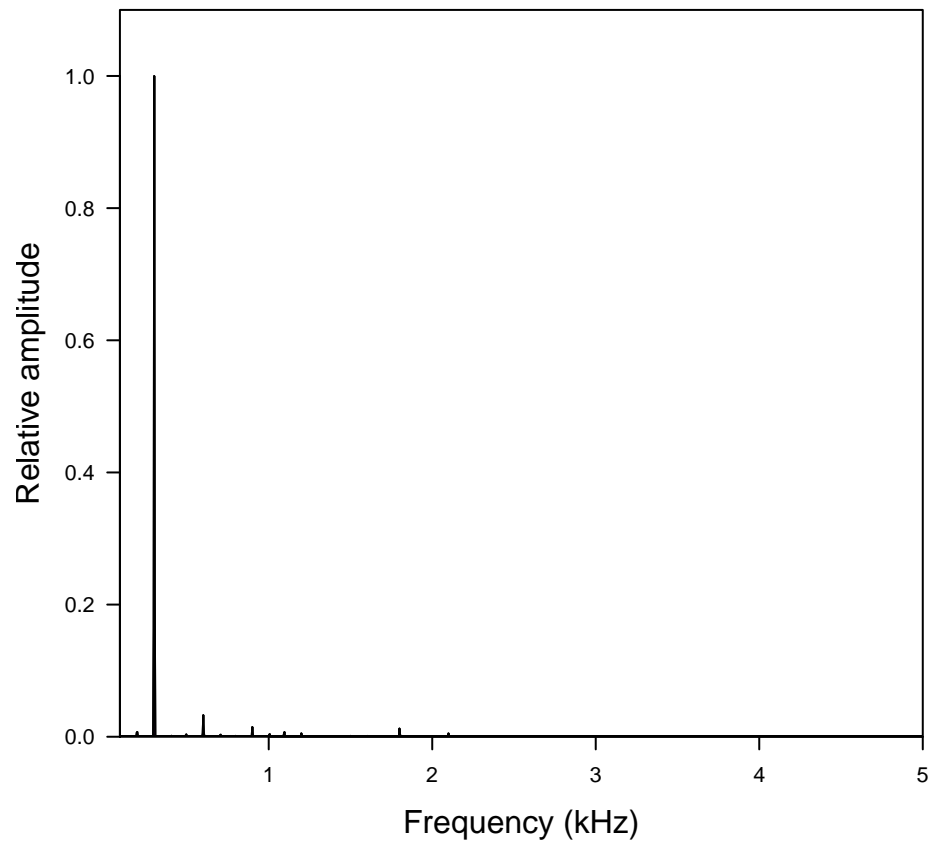

Vel. = 0.057 ; Str. = Receptacle ; Axis = x ; Fl. accession = 10-s-81-1AA

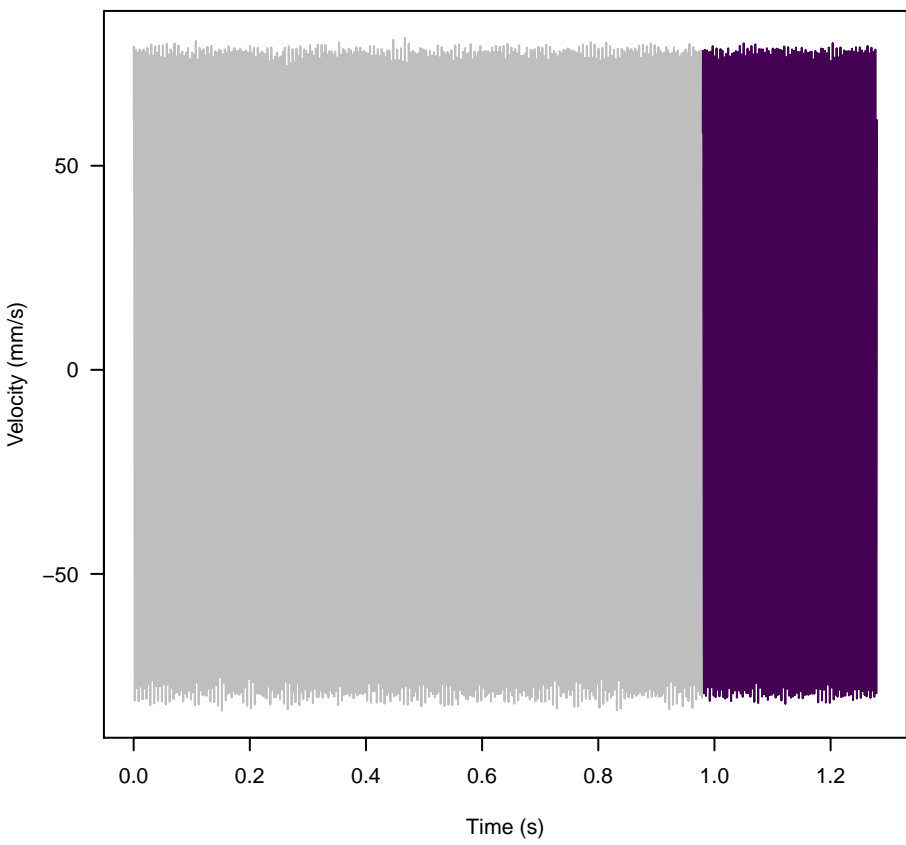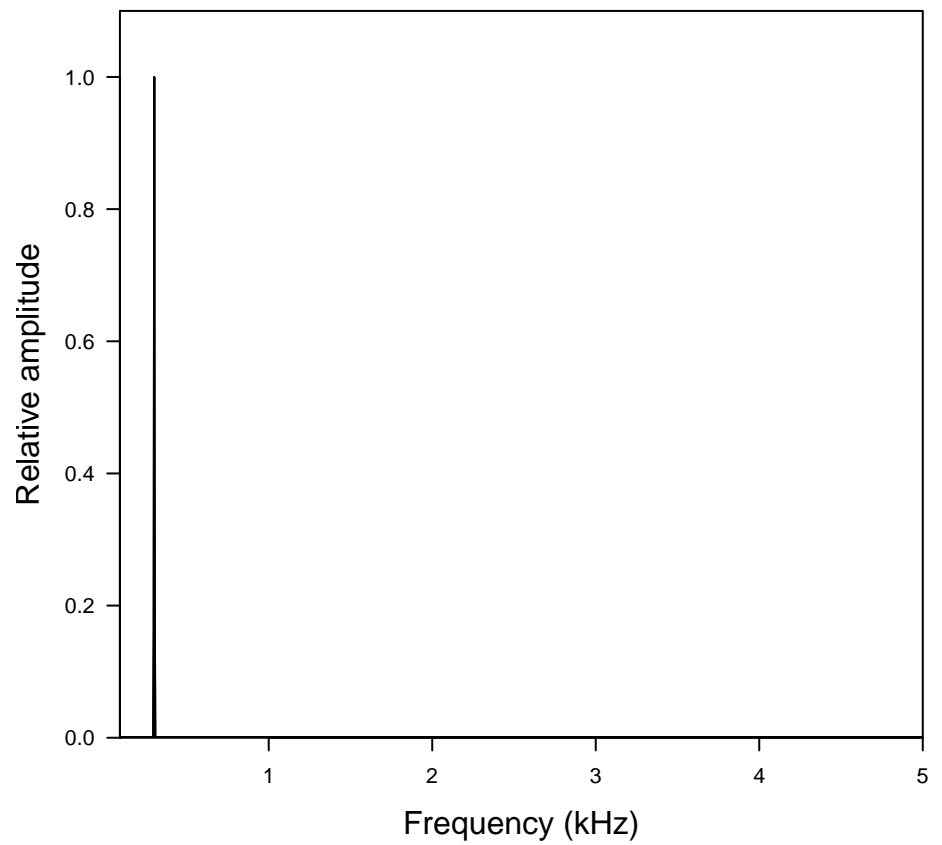

Vel. = 0.057 ; Str. = FA ; Axis = x ; Fl. accession = 10-s-81-1AA

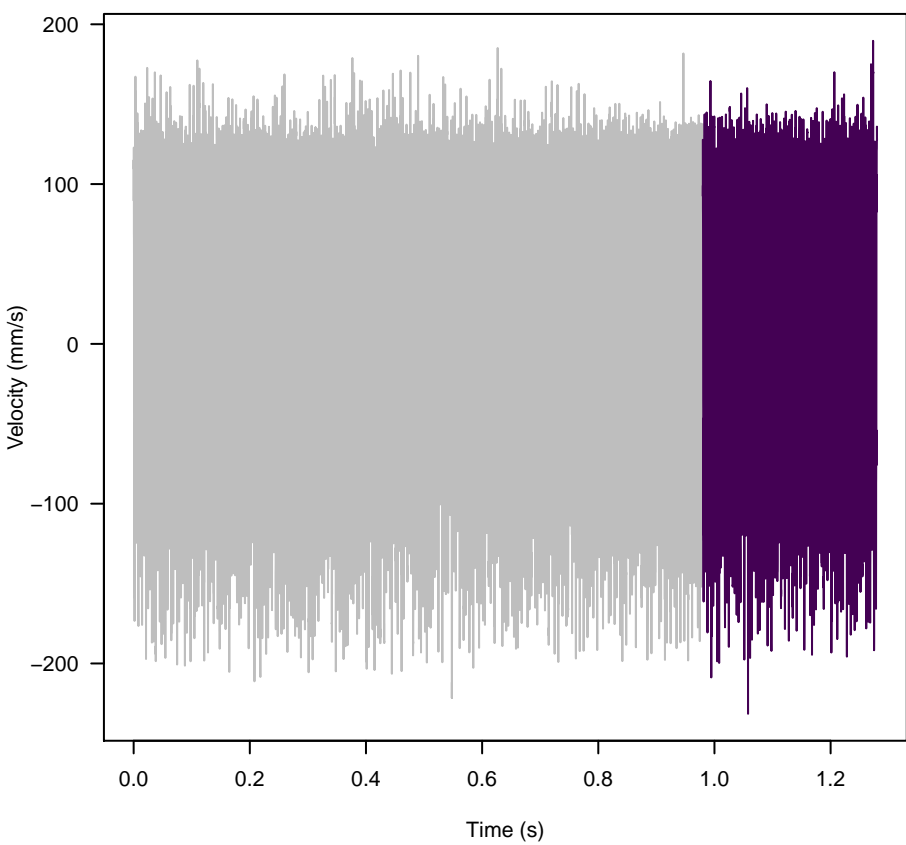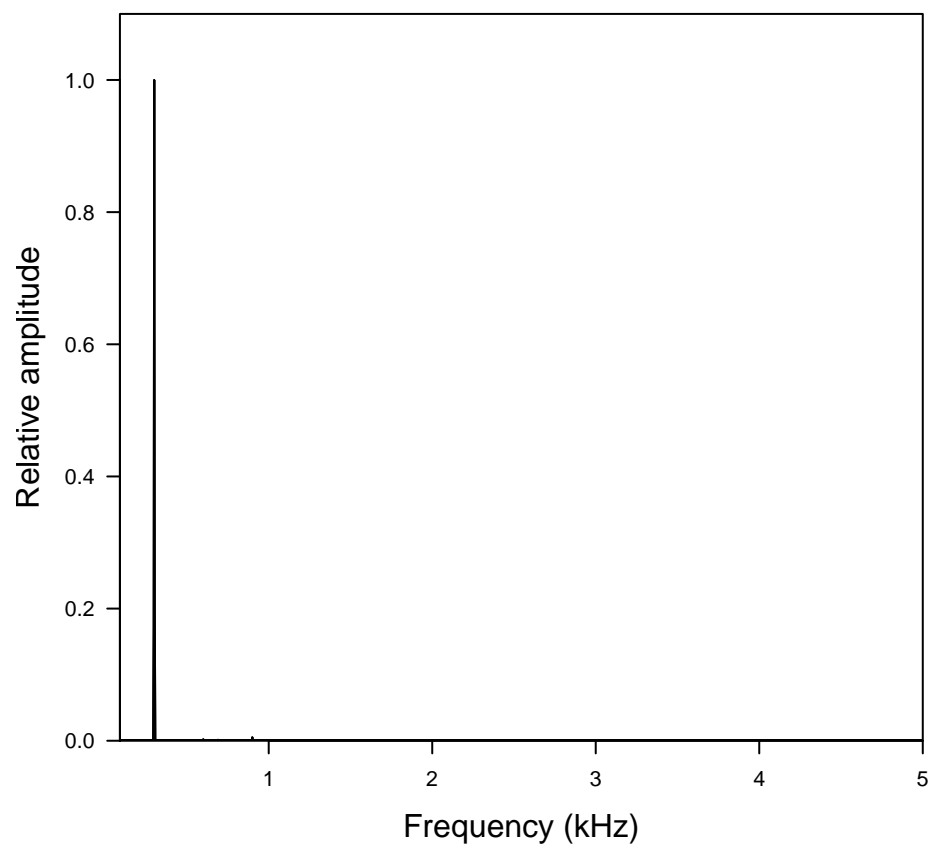

Vel. = 0.057 ; Str. = Receptacle ; Axis = x ; Fl. accession = 10-s-81-1AA

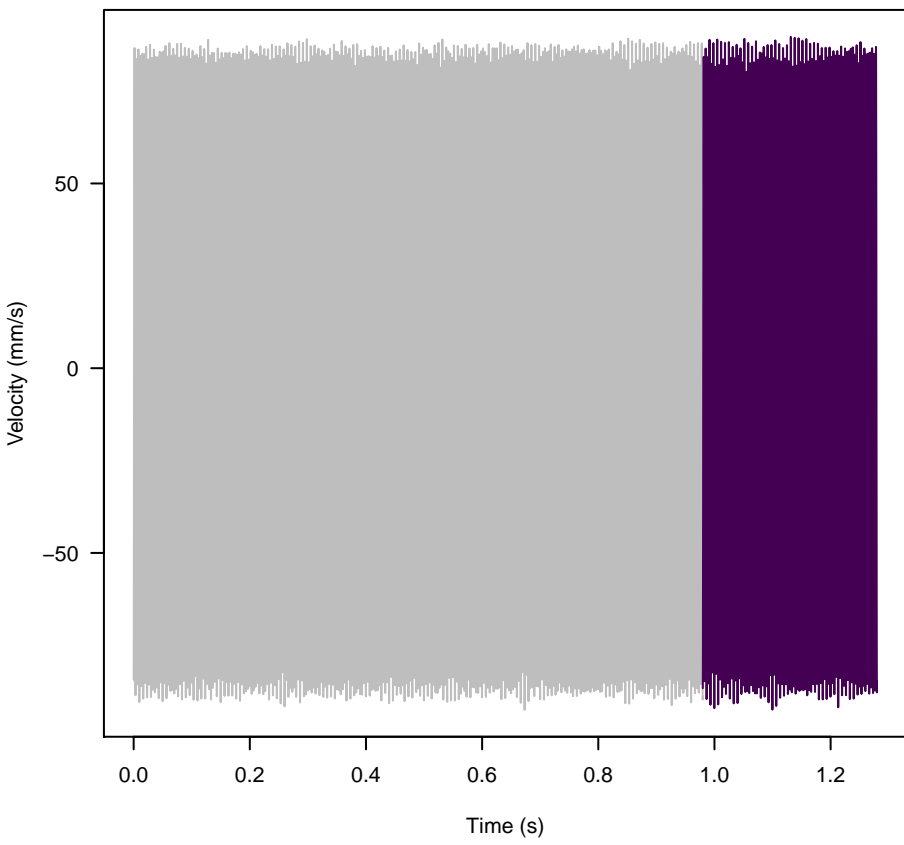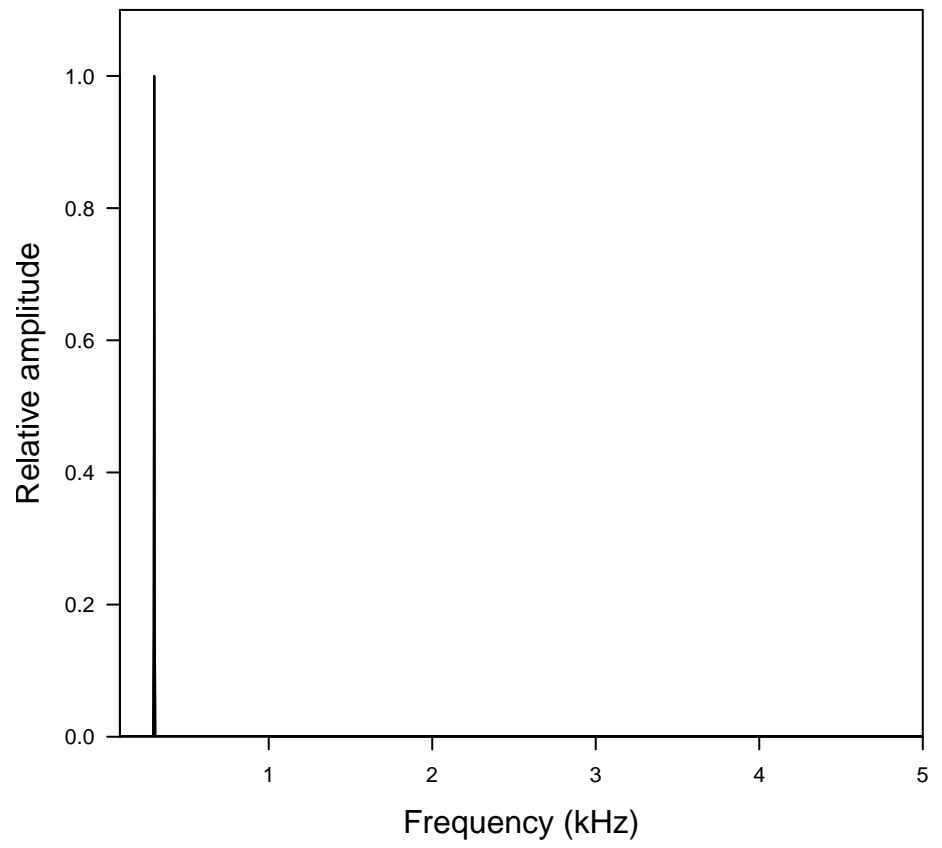

Vel. = 0.057 ; Str. = PA ; Axis = x ; Fl. accession = 10-s-81-1AA

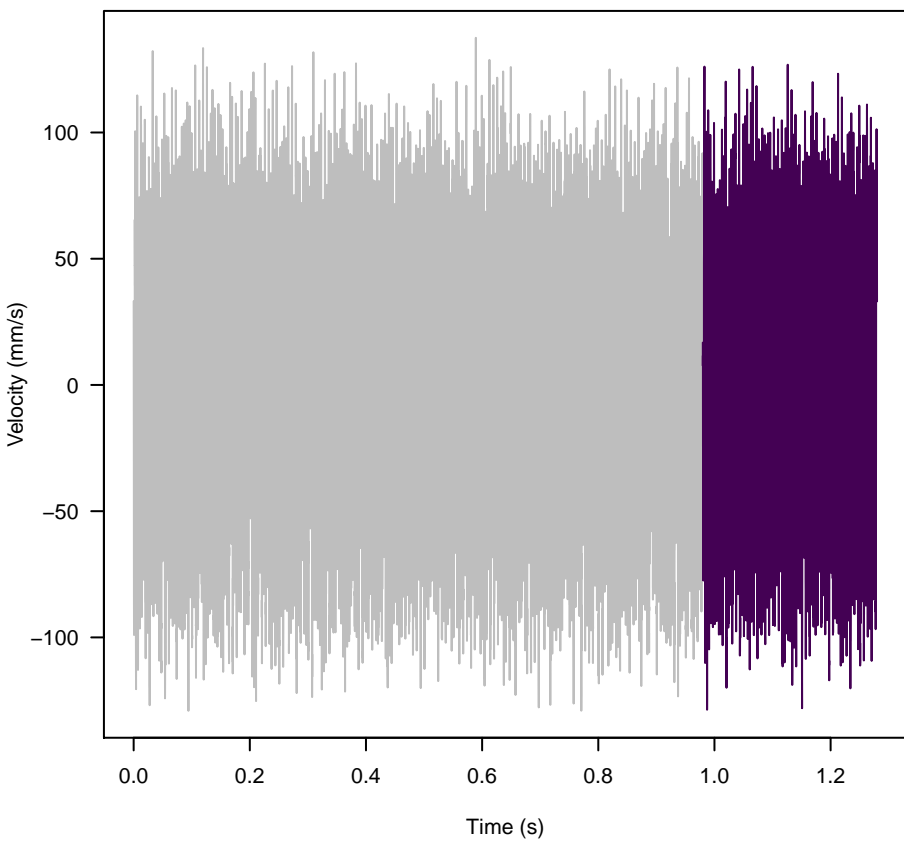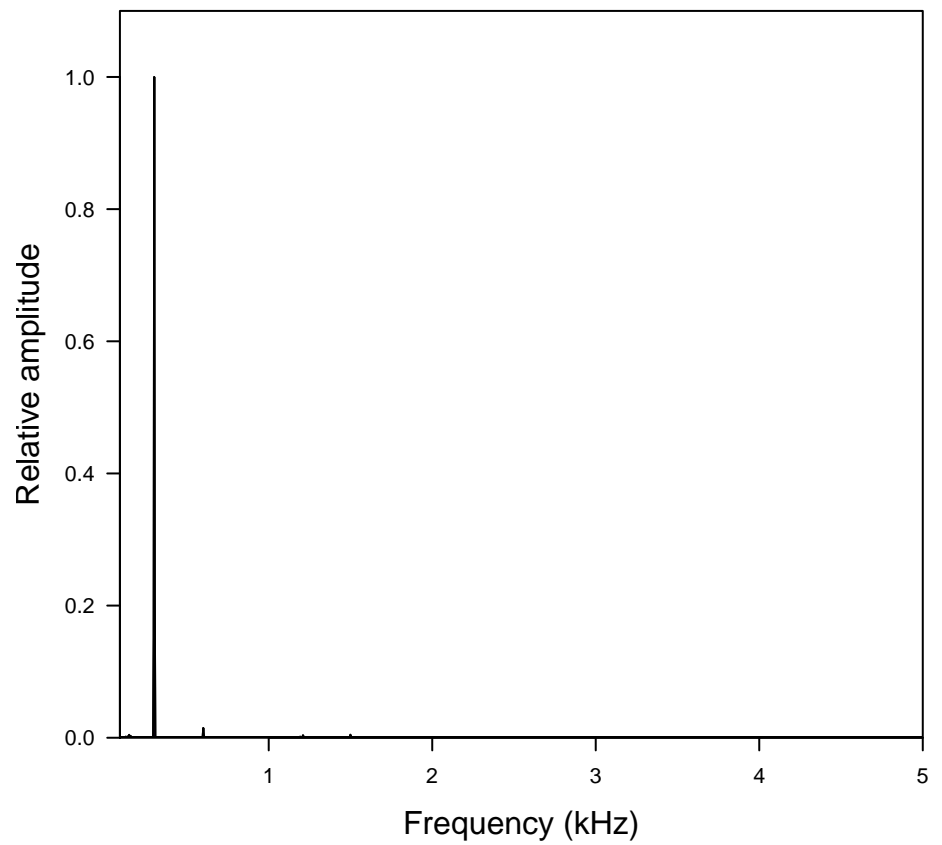

Vel. = 0.057 ; Str. = Receptacle ; Axis = x ; Fl. accession = 10-s-81-1AA

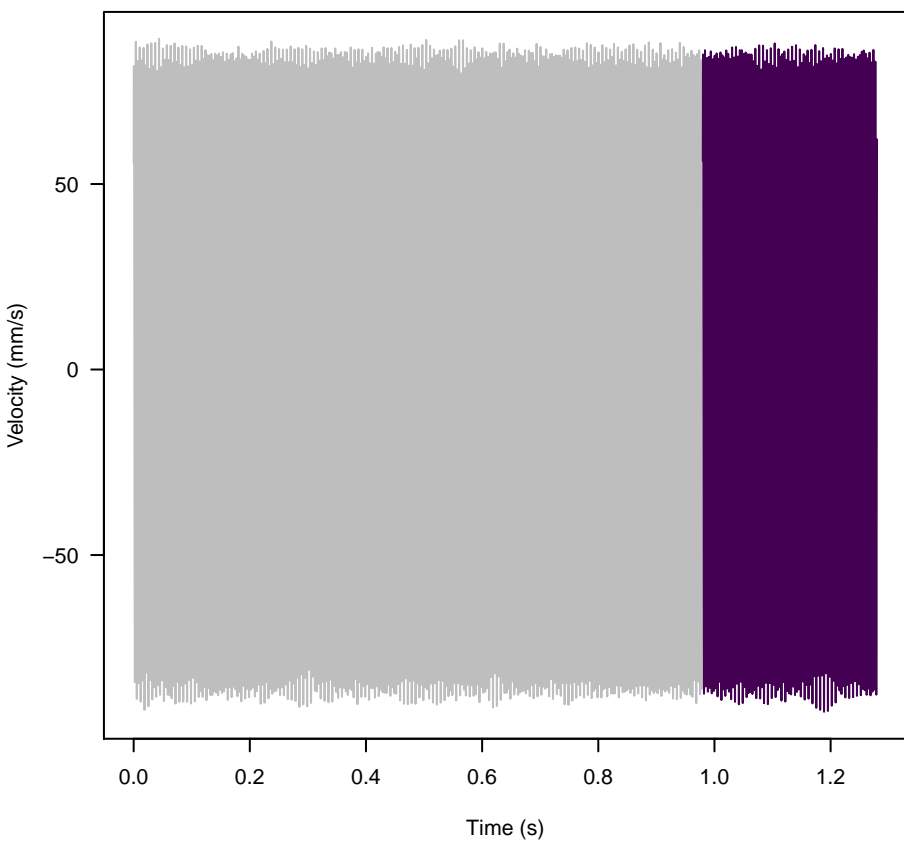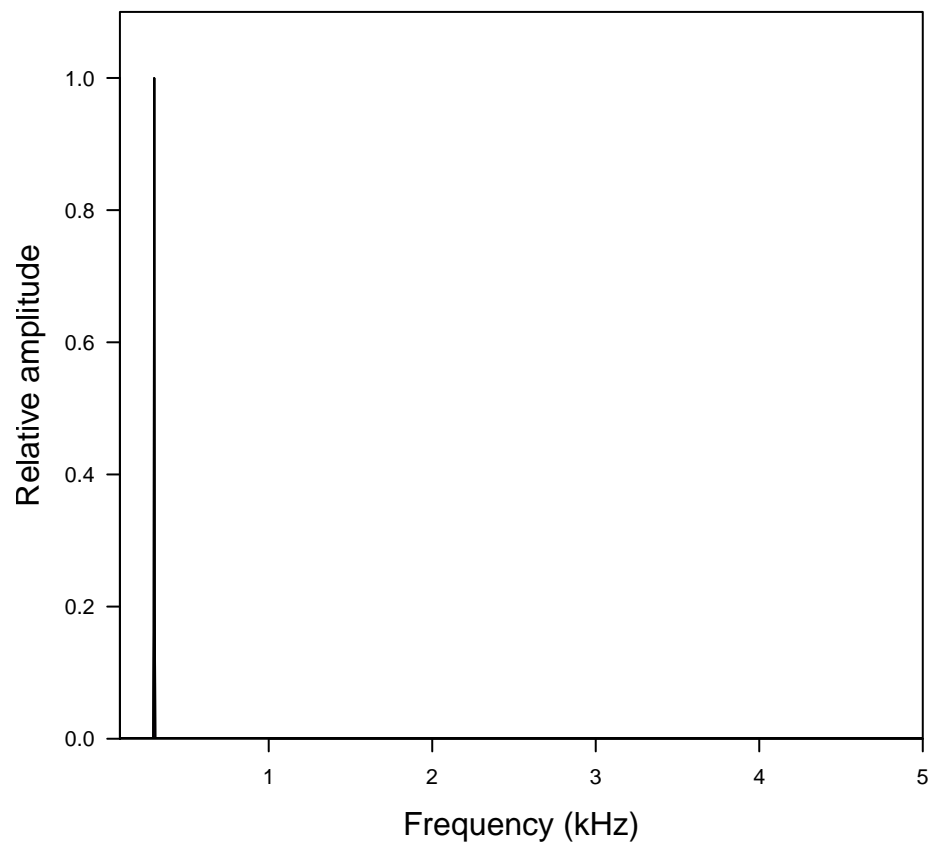

Vel. = 0.057 ; Str. = Corolla ; Axis = z ; Fl. accession = 10-s-81-1AA

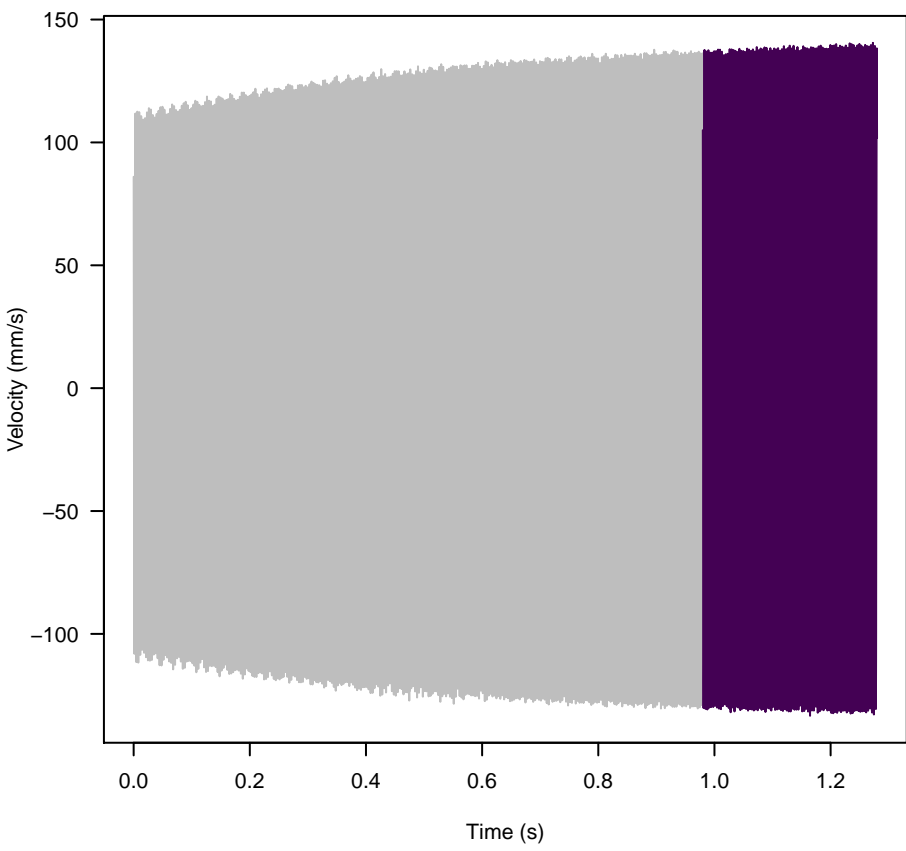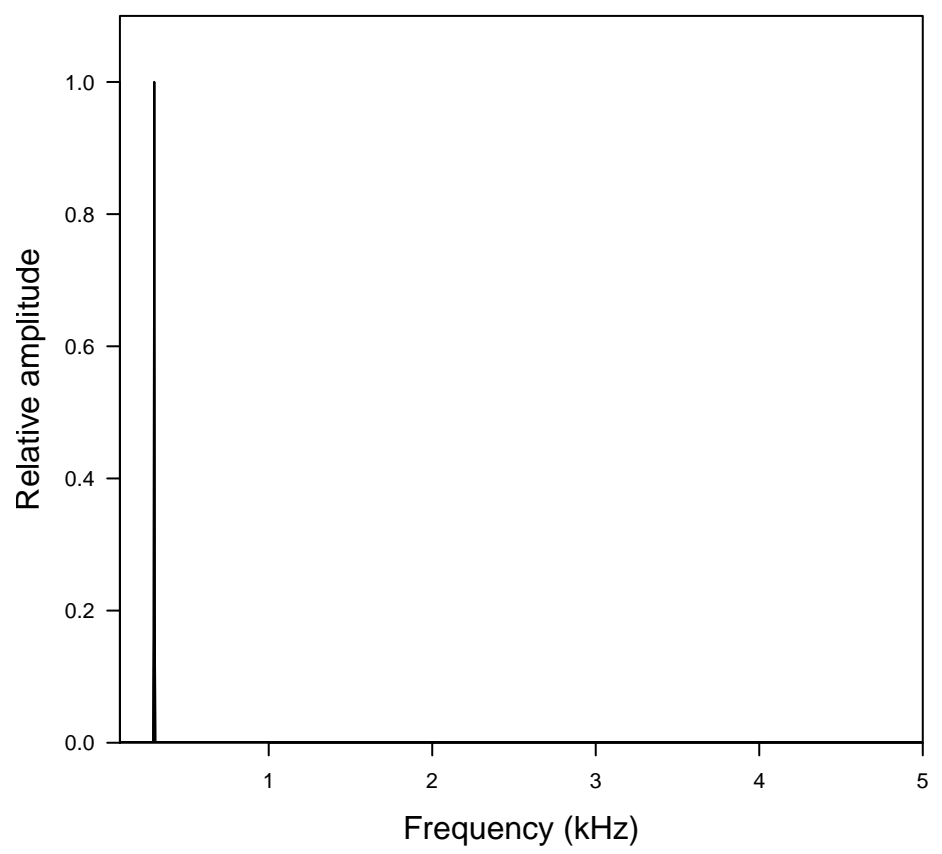

Vel. = 0.057 ; Str. = Receptacle ; Axis = z ; Fl. accession = 10-s-81-1AA

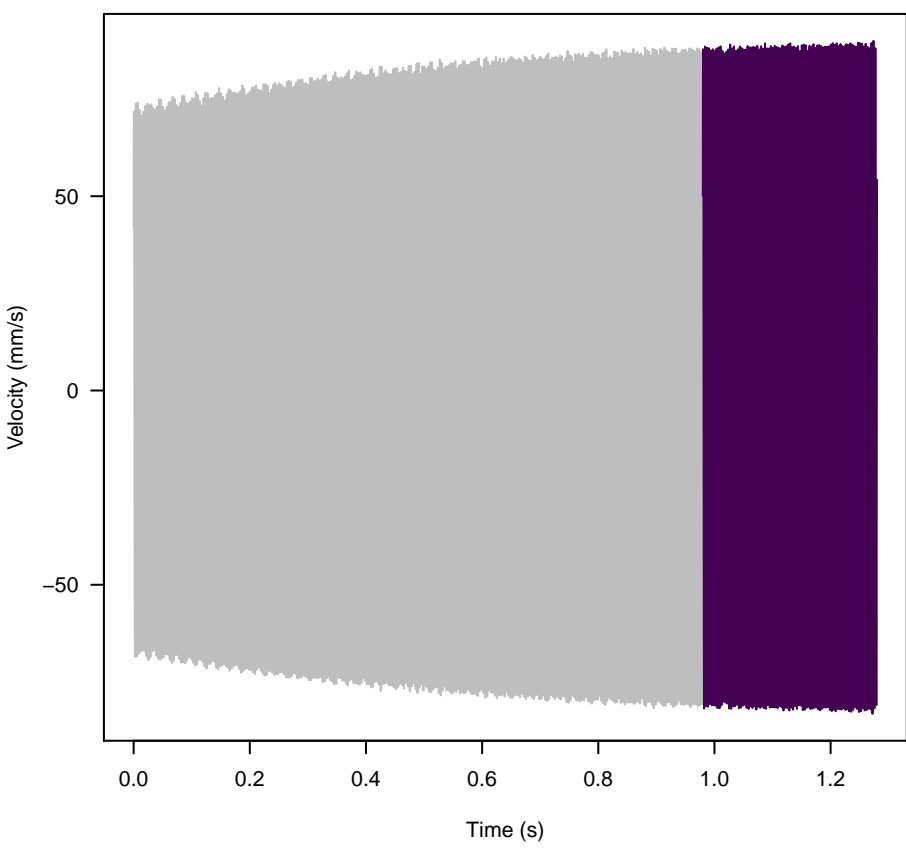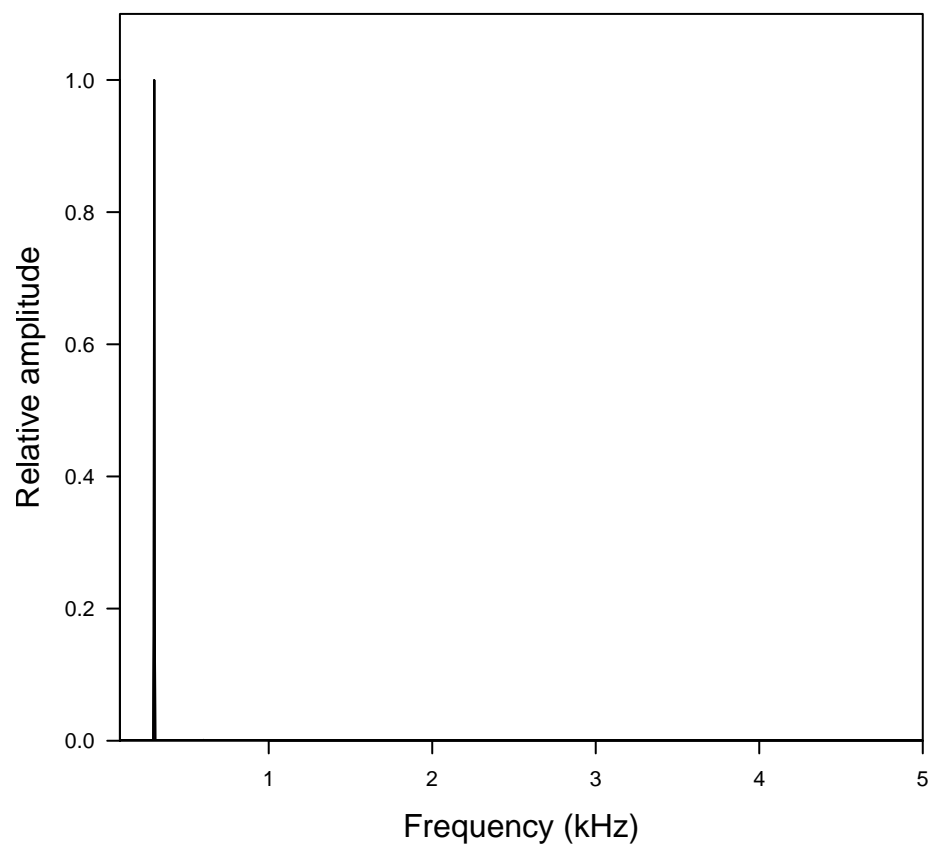

Vel. = 0.057 ; Str. = FA ; Axis = z ; Fl. accession = 10-s-81-1AA

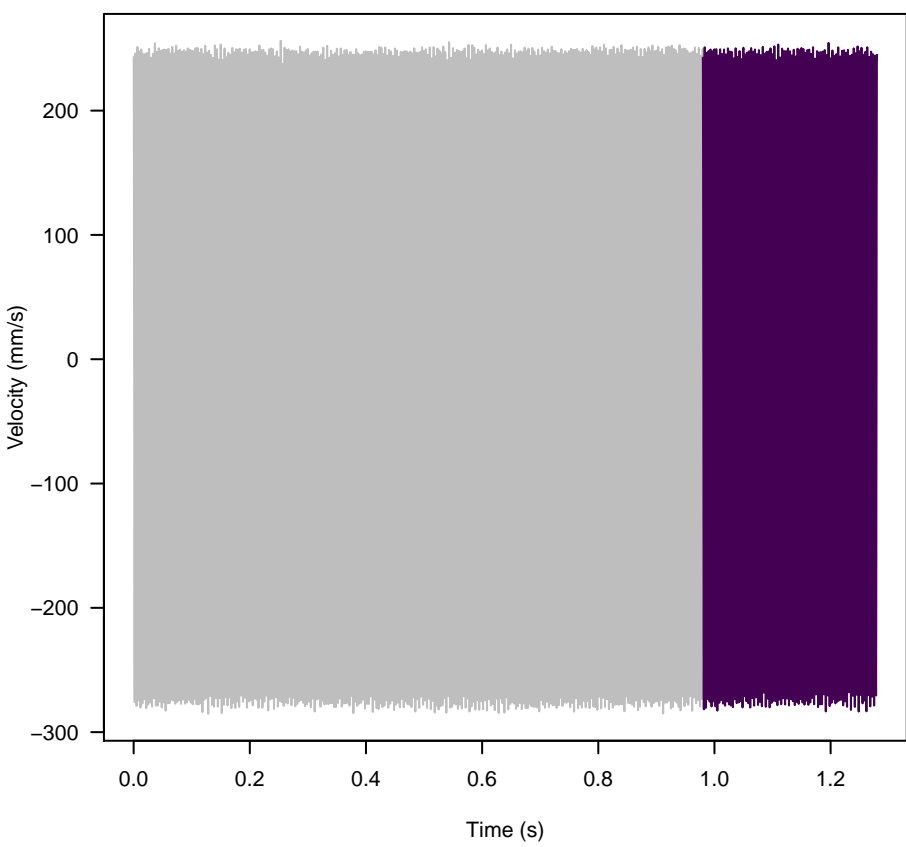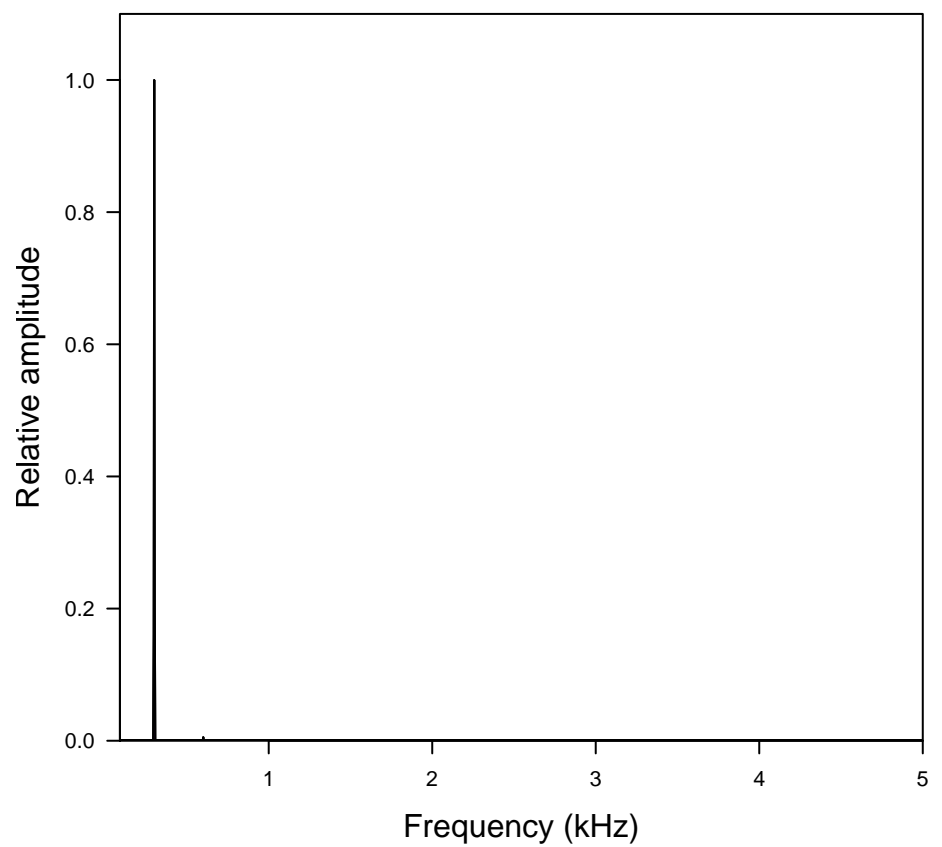

Vel. = 0.057 ; Str. = Receptacle ; Axis = z ; Fl. accession = 10-s-81-1AA

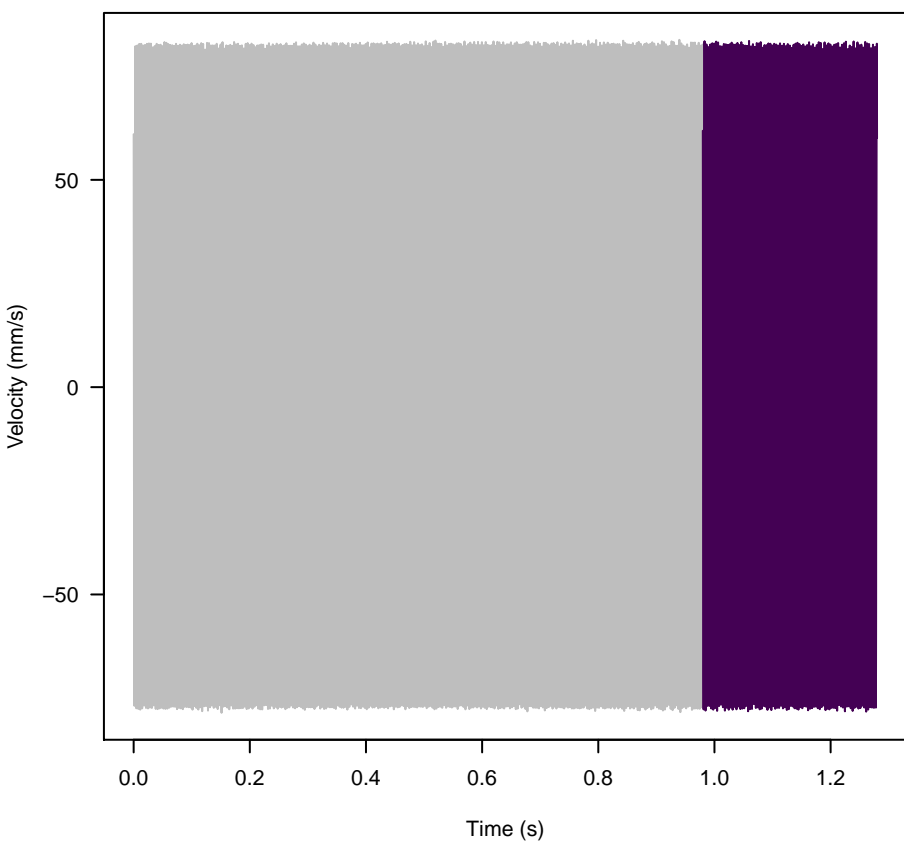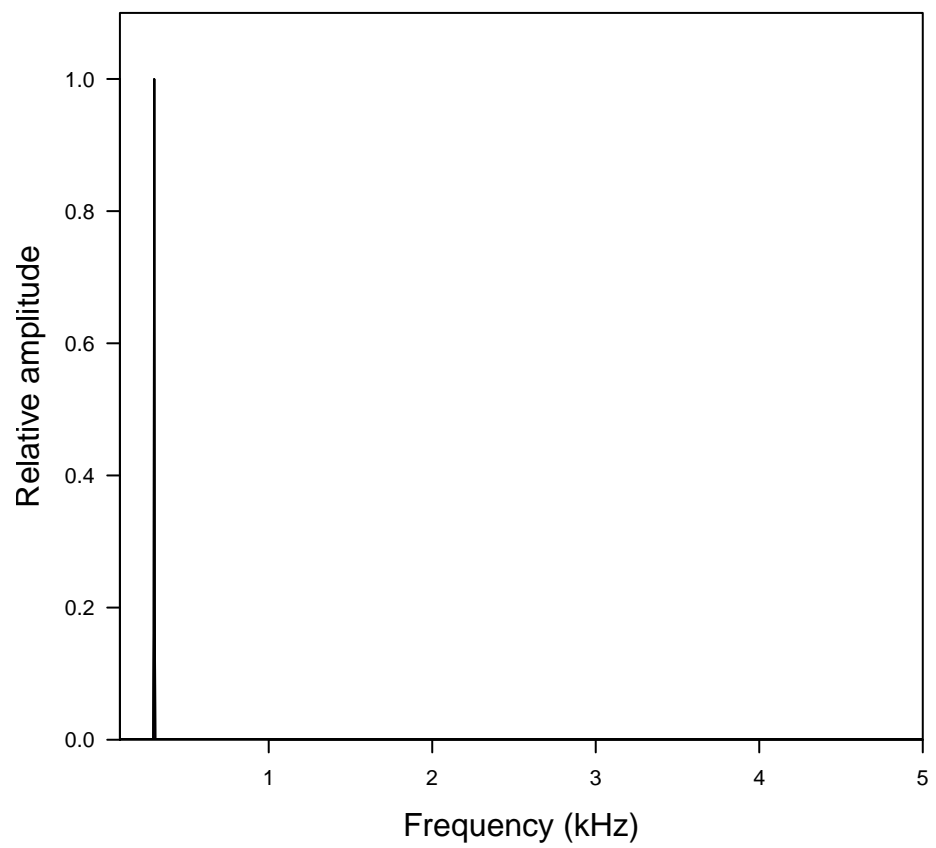

Vel. = 0.057 ; Str. = PA ; Axis = z ; Fl. accession = 10-s-81-1AA

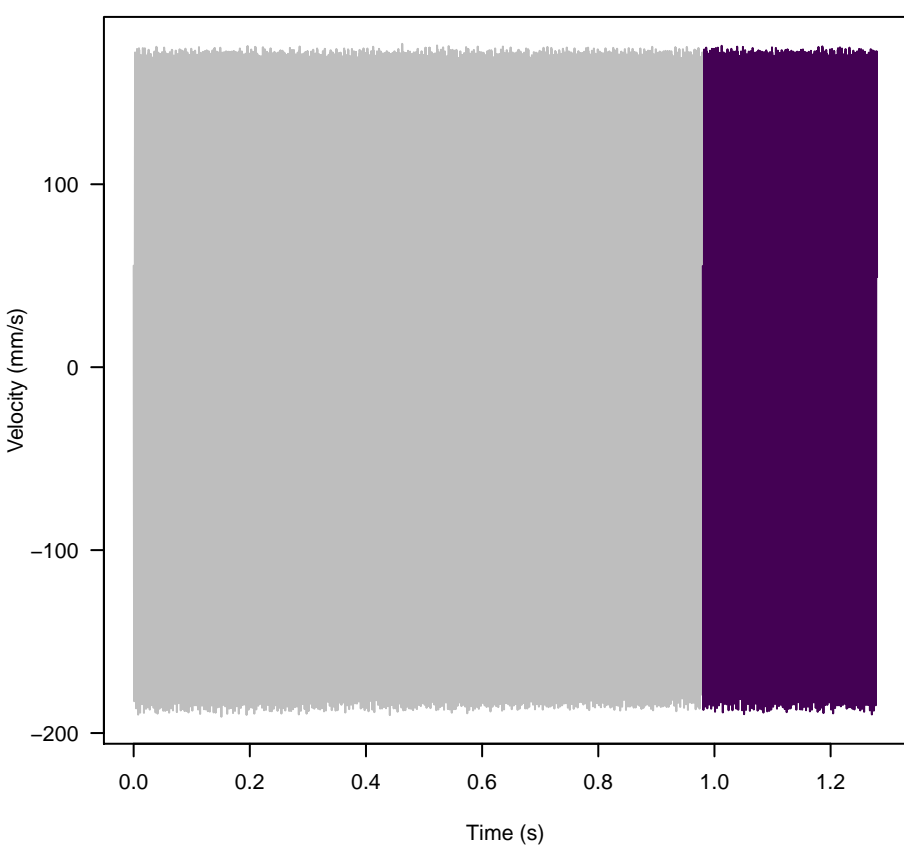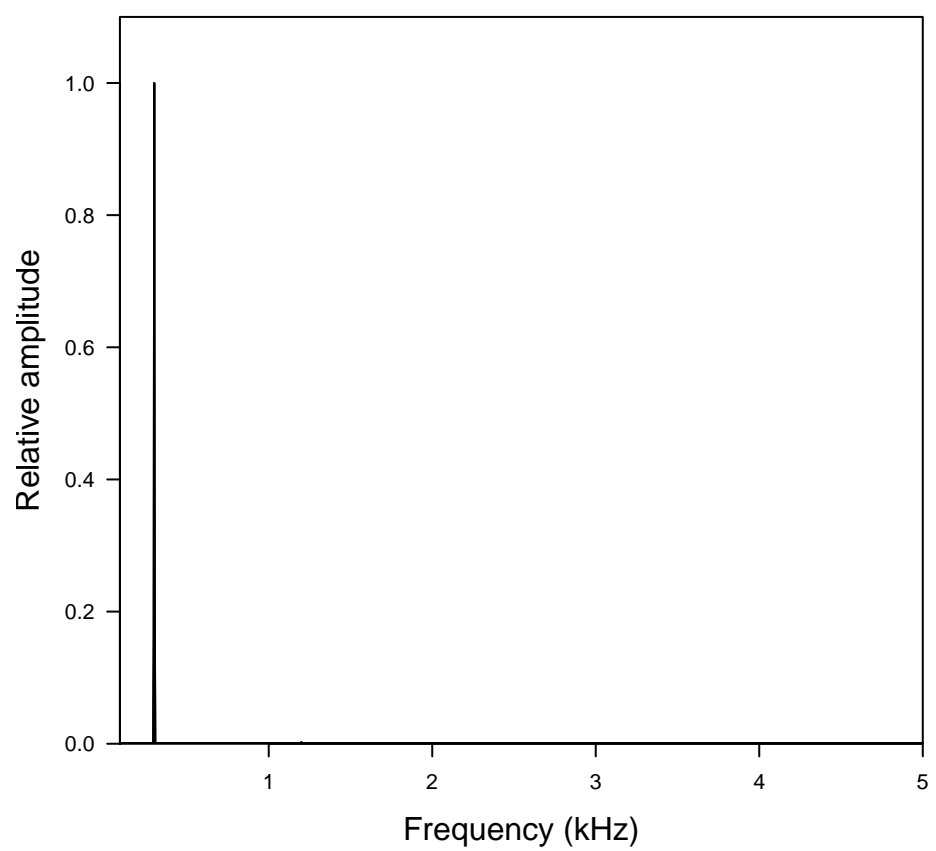

Vel. = 0.057 ; Str. = Receptacle ; Axis = z ; Fl. accession = 10-s-81-1AA

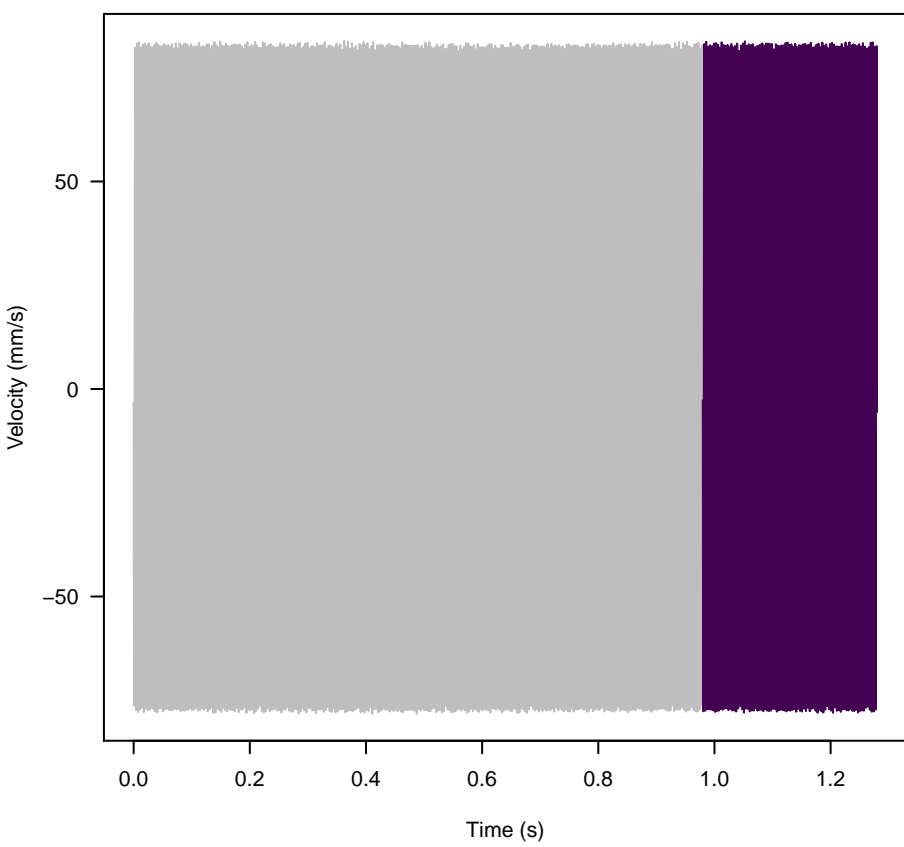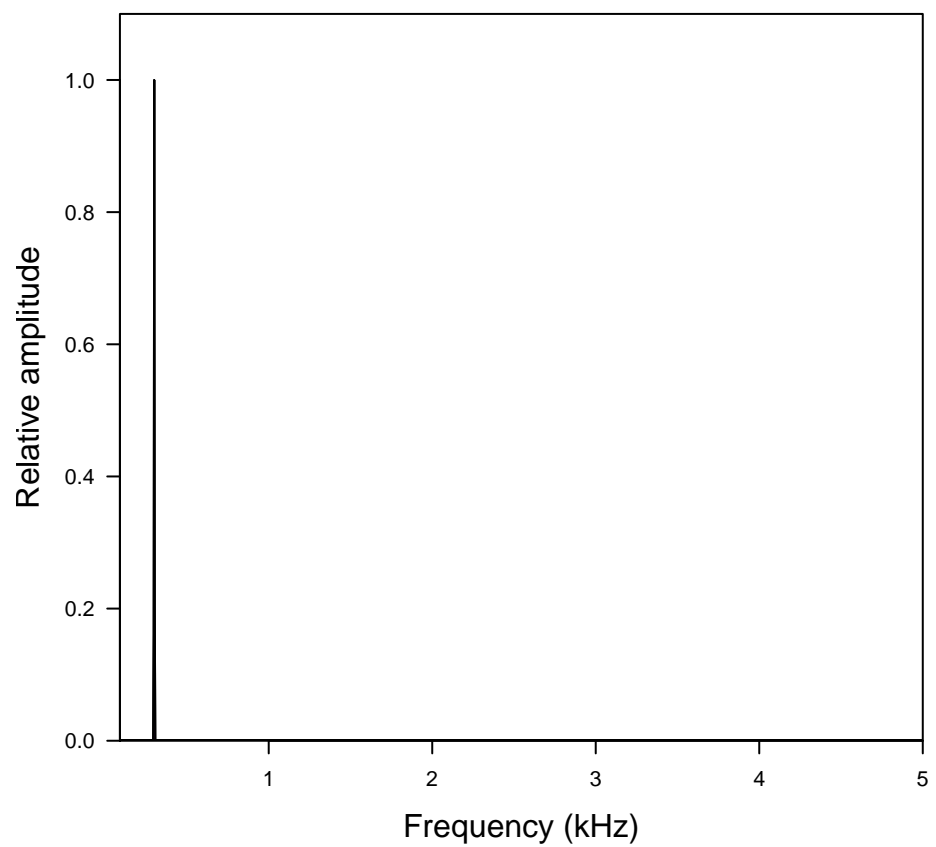



Vel. = 0.028 ; Str. = PA ; Axis = z ; Fl. accession = 10-s-81-1AA

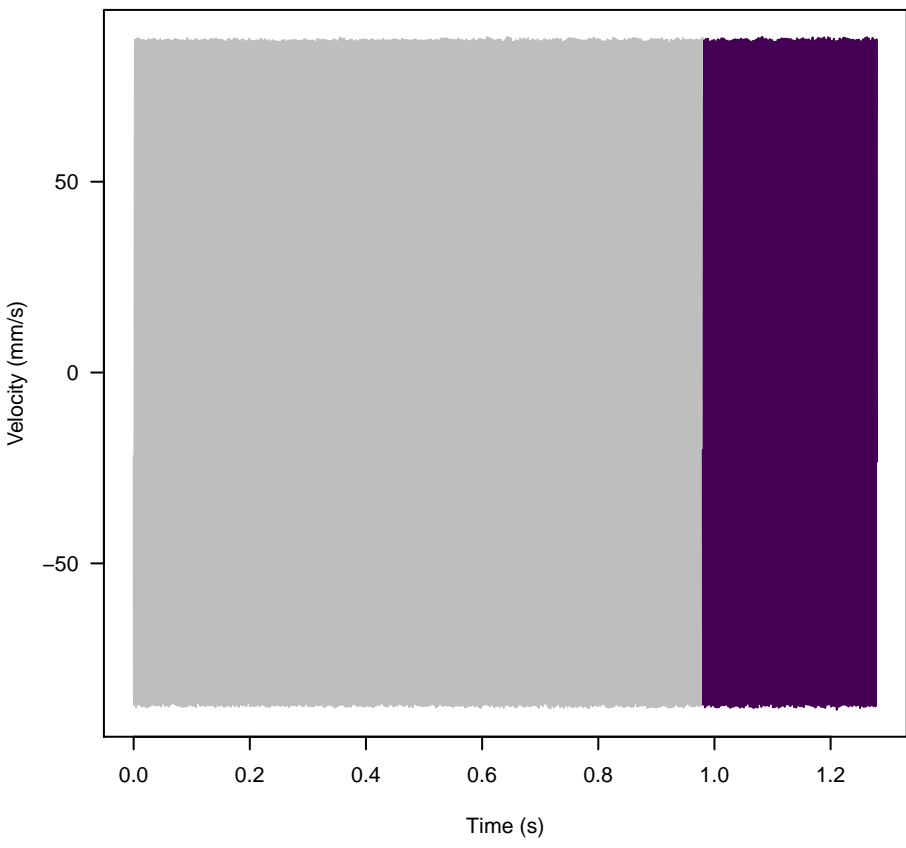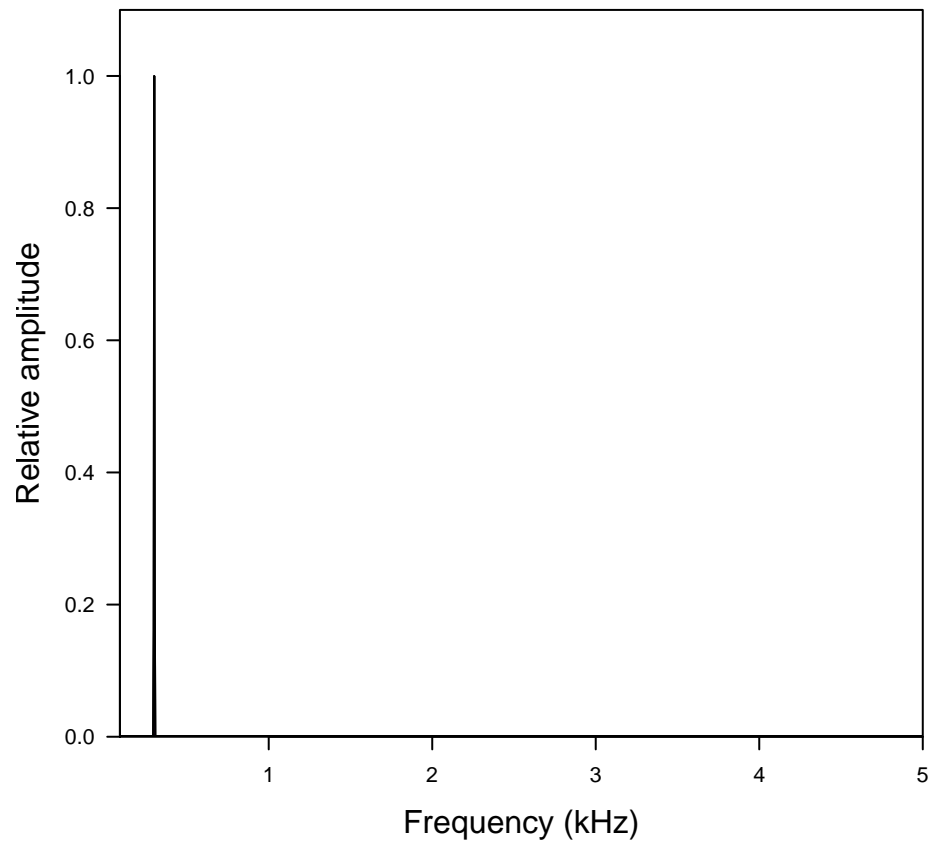

Vel. = 0.028 ; Str. = Receptacle ; Axis = z ; Fl. accession = 10-s-81-1AA

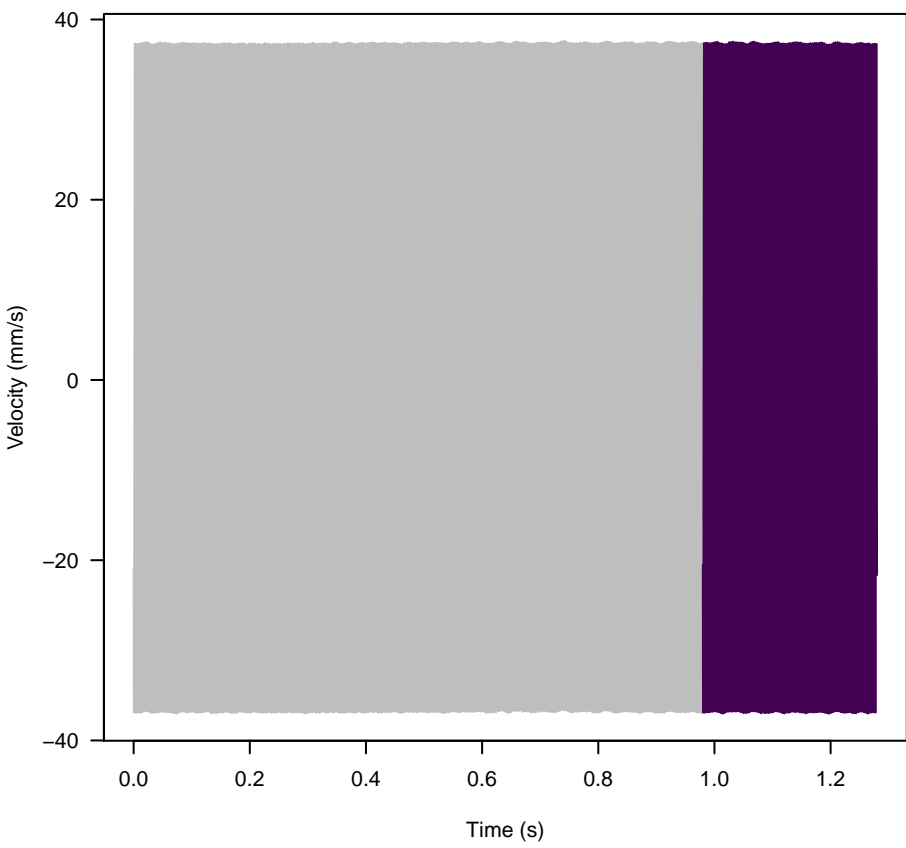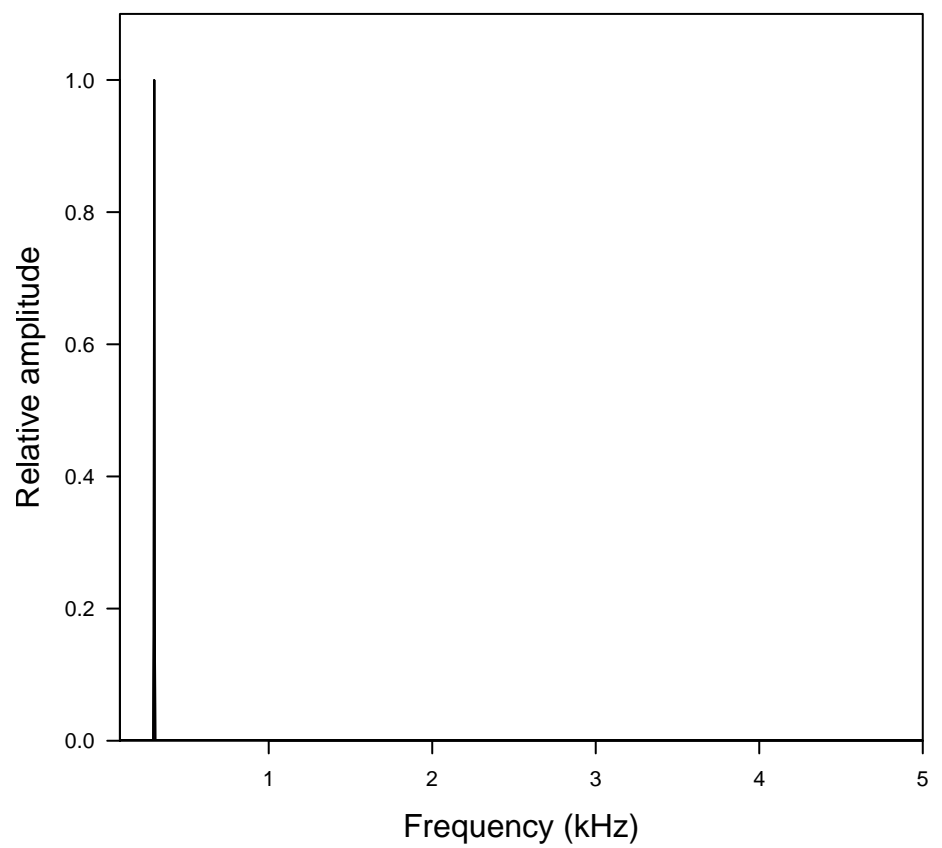

Vel. = 0.028 ; Str. = FA ; Axis = z ; Fl. accession = 10-s-81-1AA

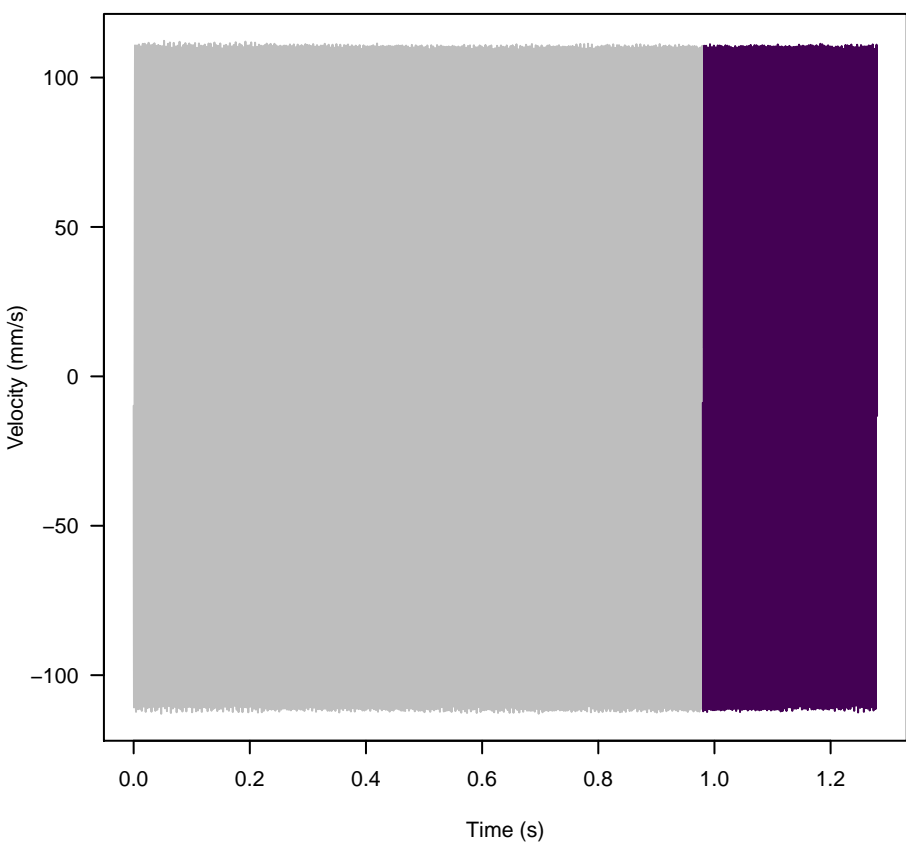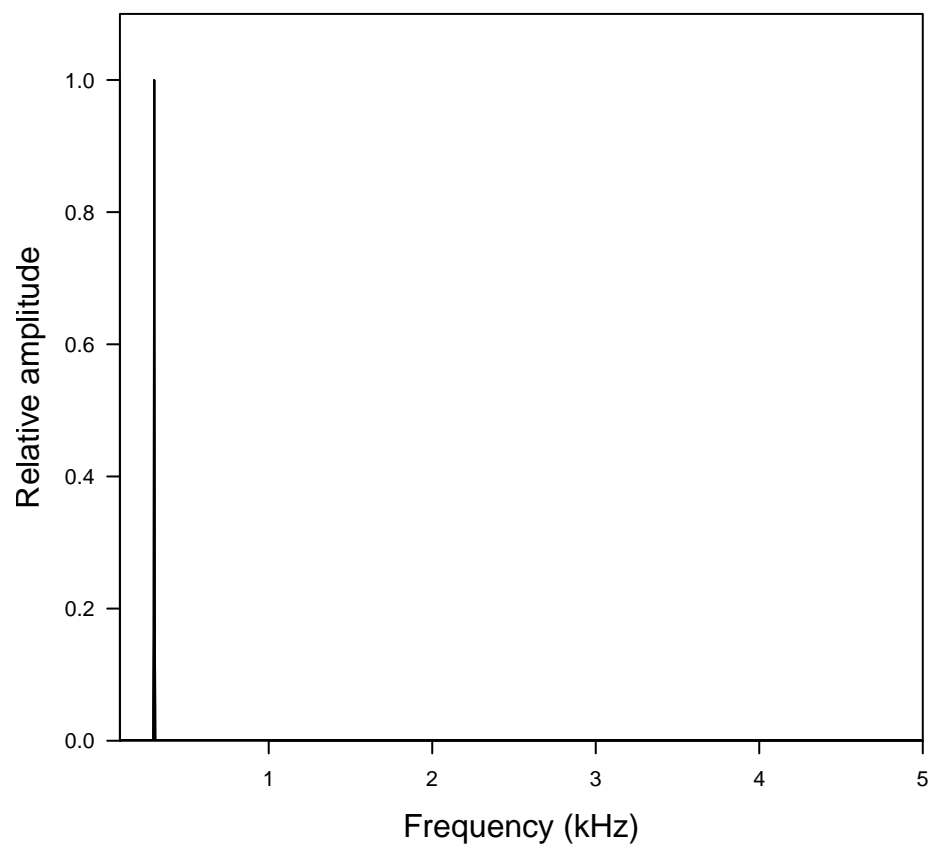

Vel. = 0.028 ; Str. = Receptacle ; Axis = z ; Fl. accession = 10-s-81-1AA

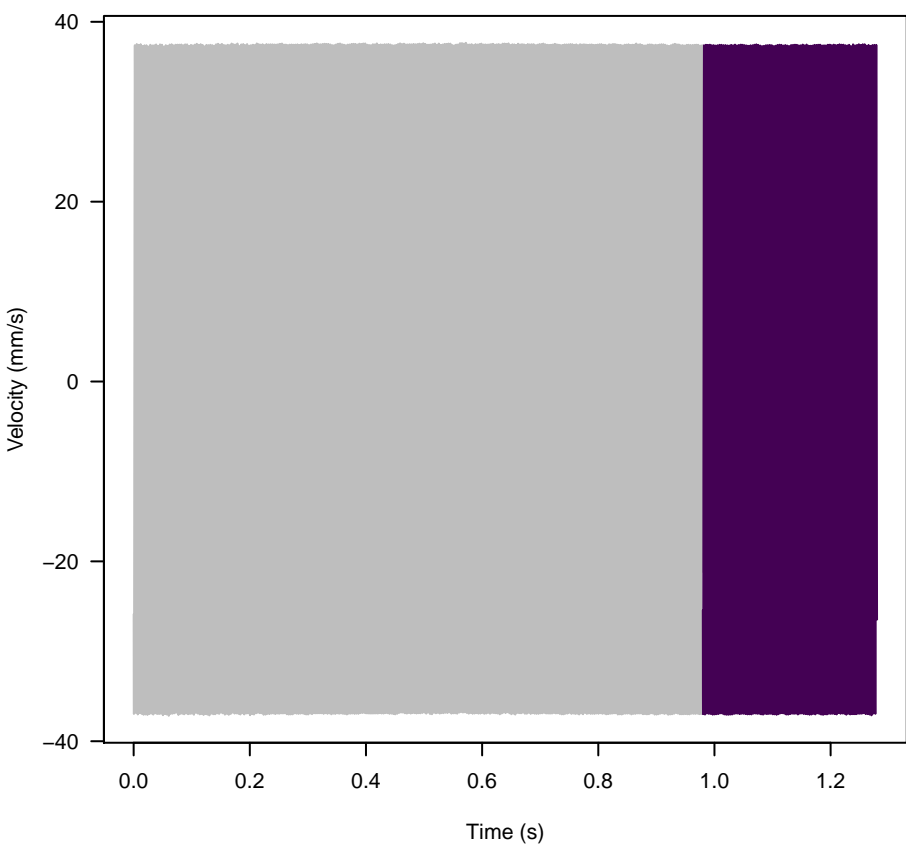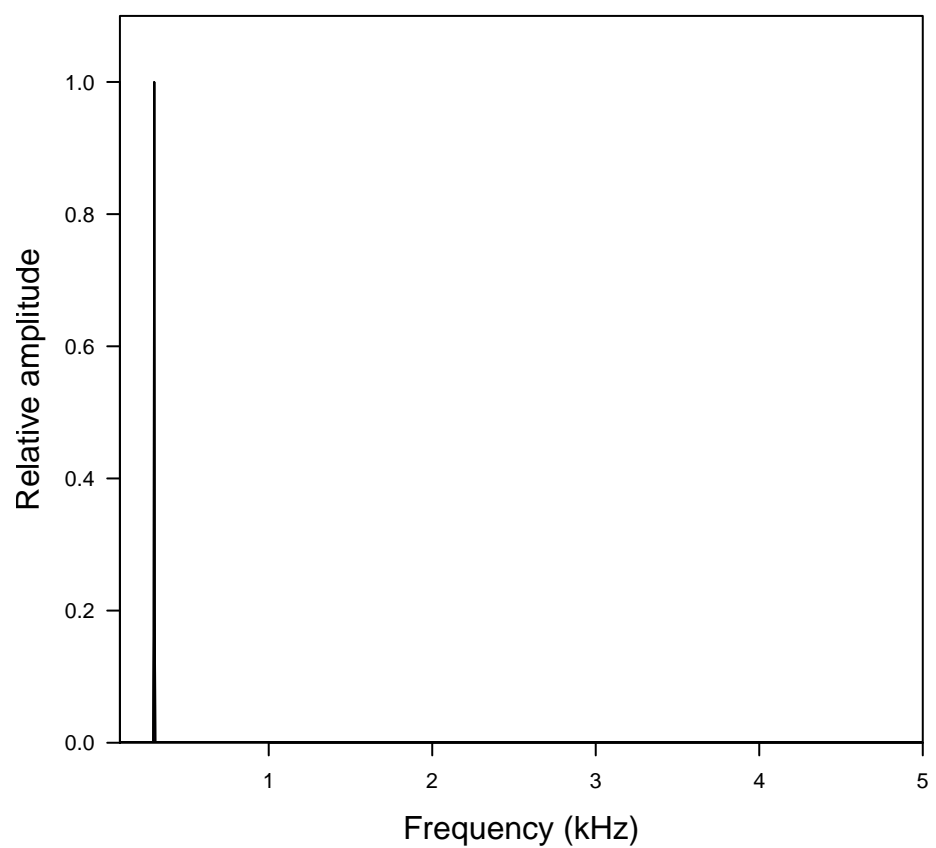

Vel. = 0.028 ; Str. = Corolla ; Axis = z ; Fl. accession = 10-s-81-1AA

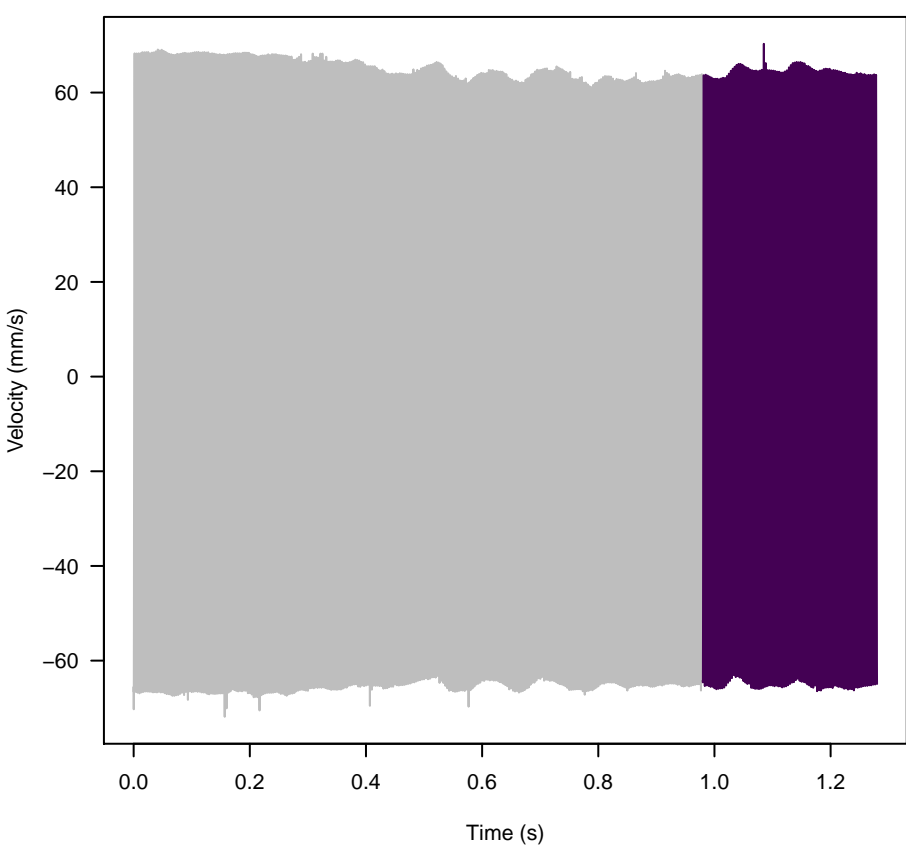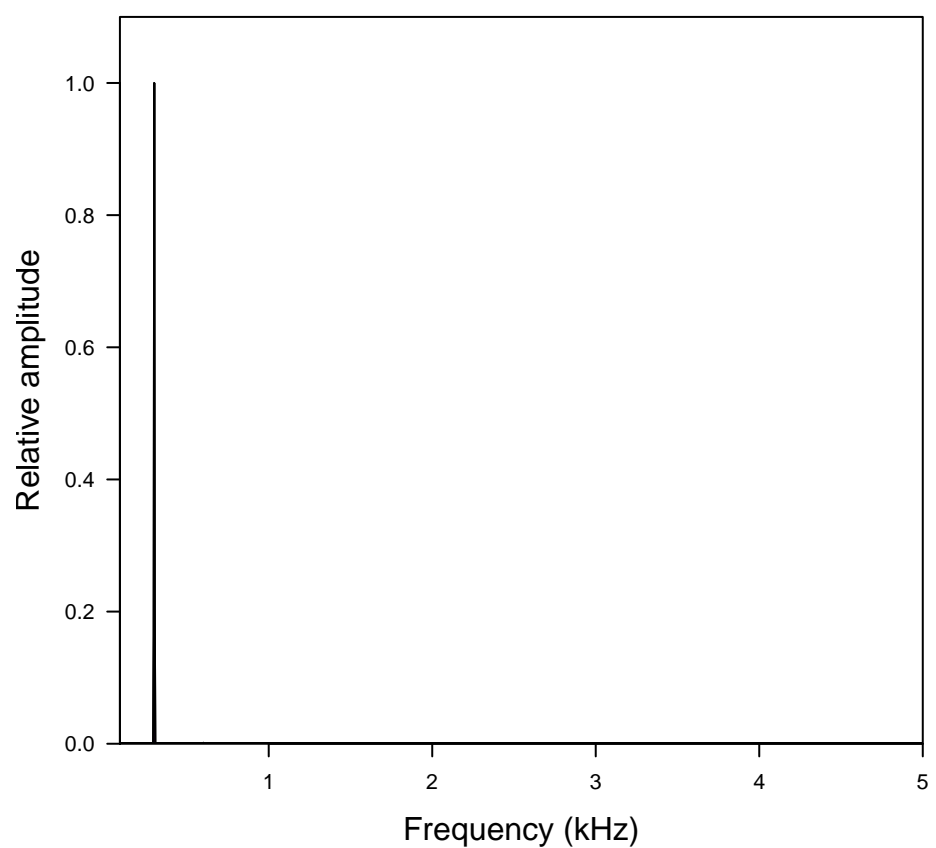

Vel. = 0.028 ; Str. = Receptacle ; Axis = z ; Fl. accession = 10-s-81-1AA

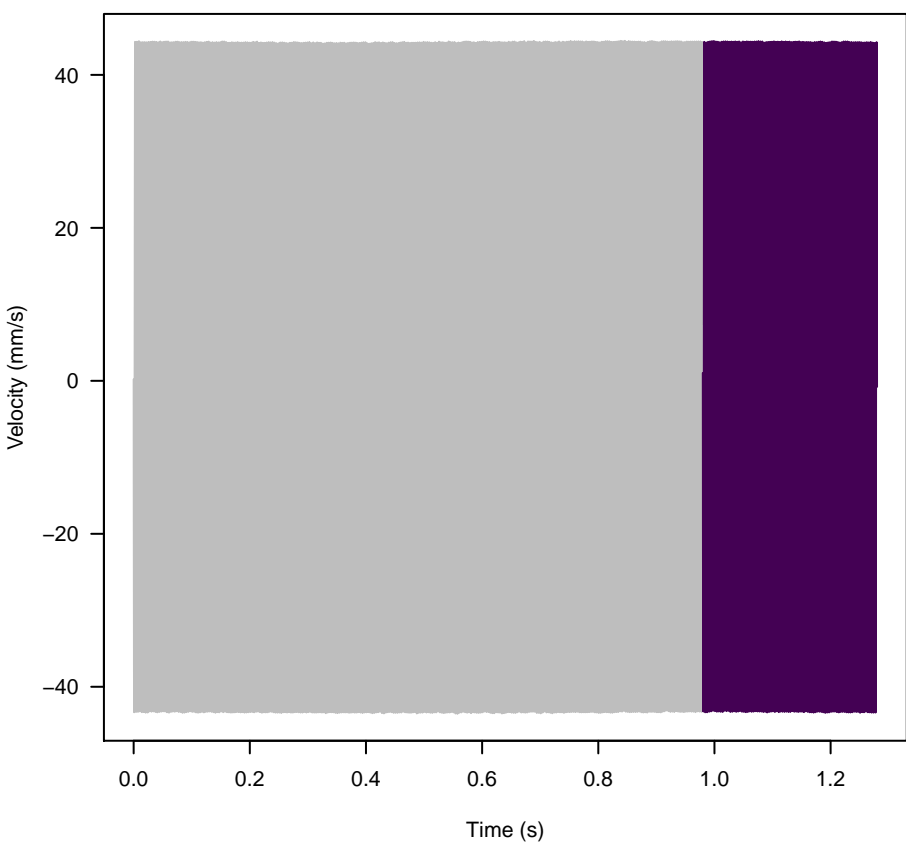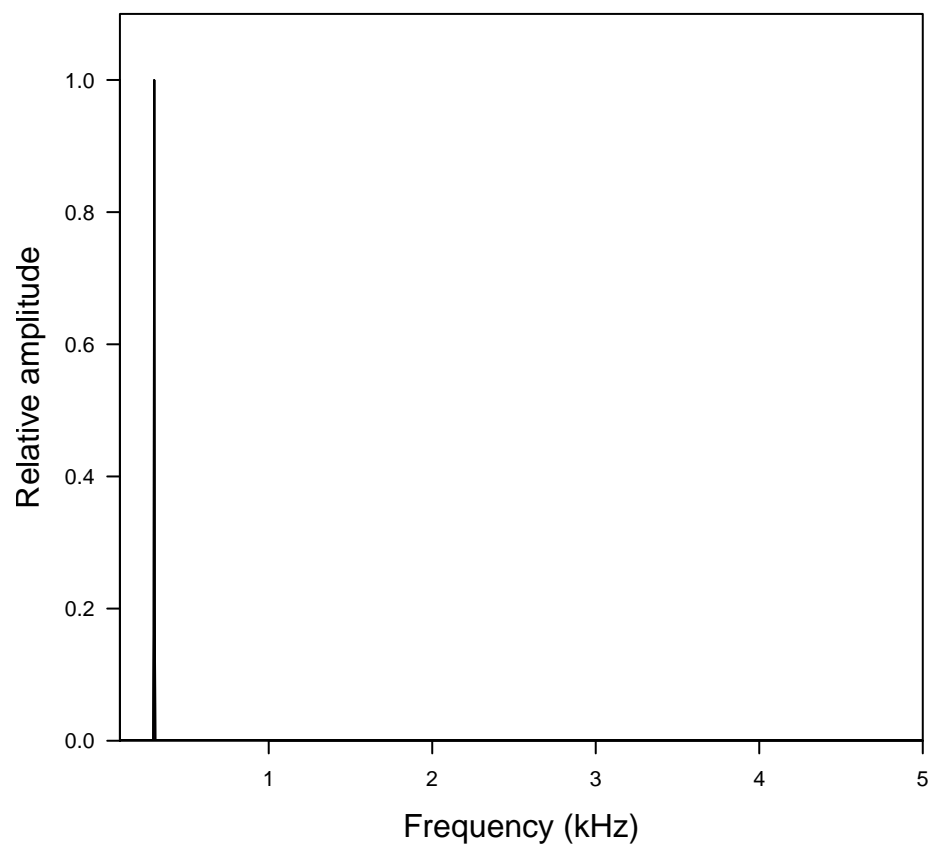

Vel. = 0.014 ; Str. = Corolla ; Axis = z ; Fl. accession = 10-s-81-1AA

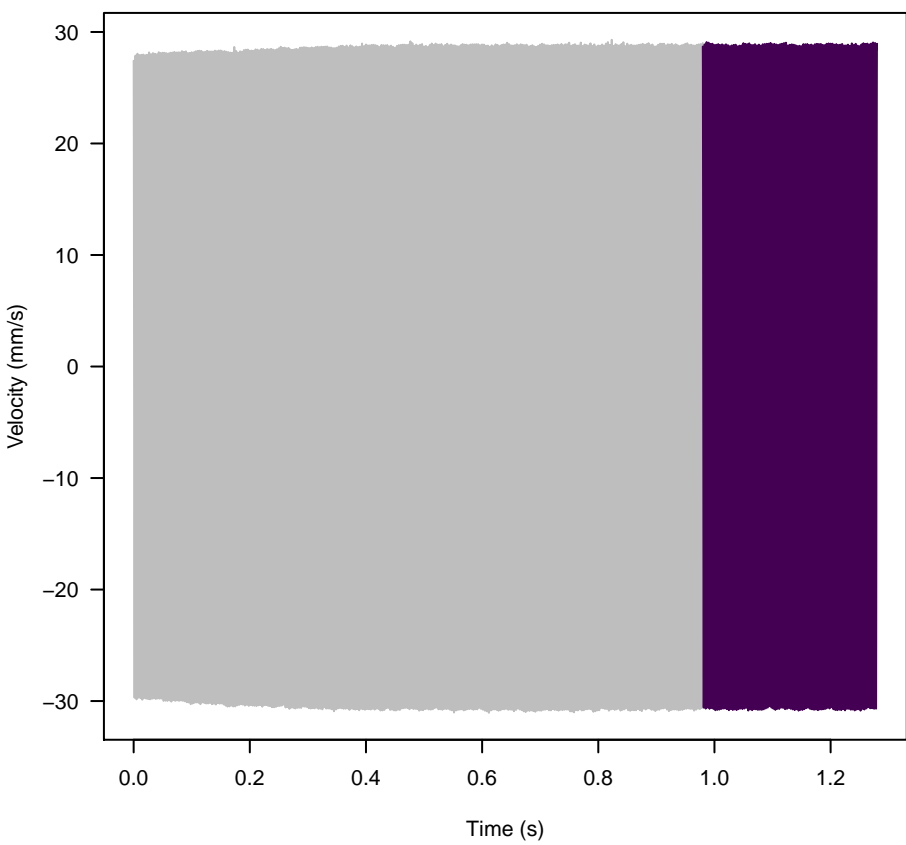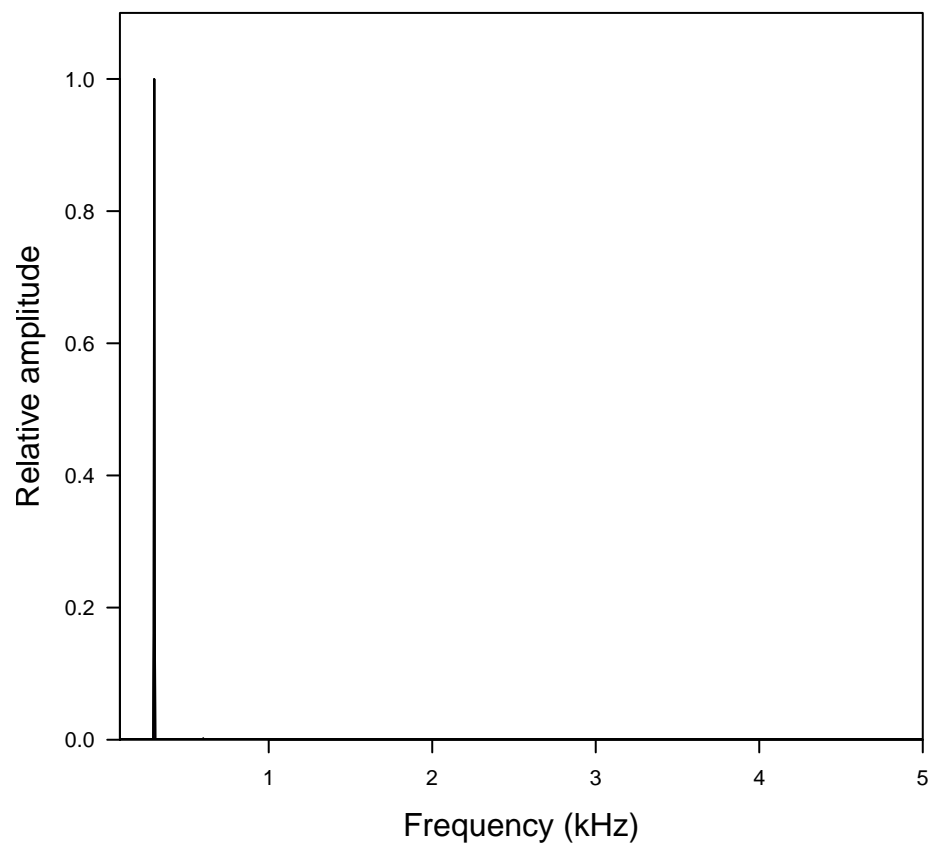

Vel. = 0.014 ; Str. = Receptacle ; Axis = z ; Fl. accession = 10-s-81-1AA

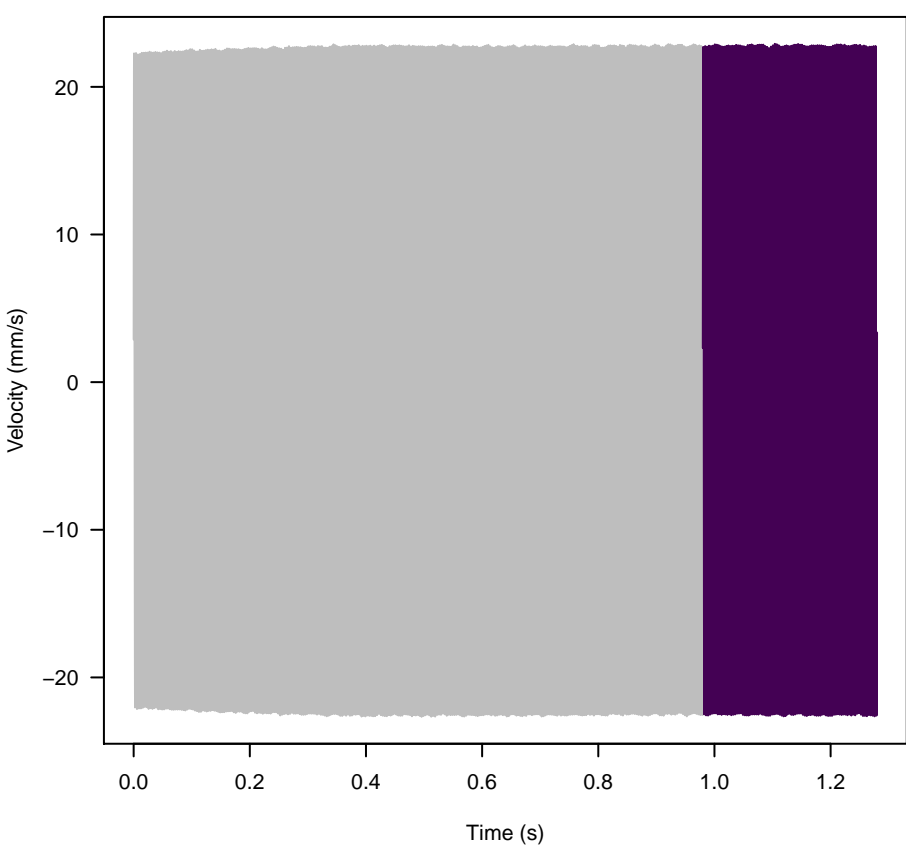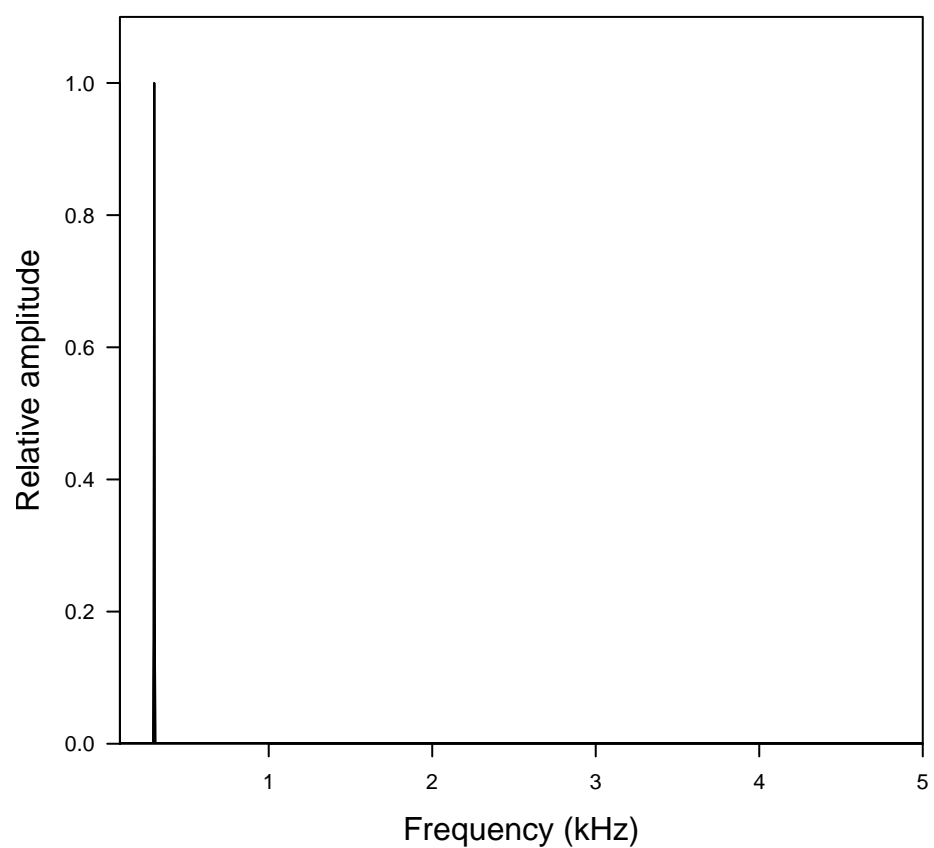

Vel. = 0.014 ; Str. = FA ; Axis = z ; Fl. accession = 10-s-81-1AA

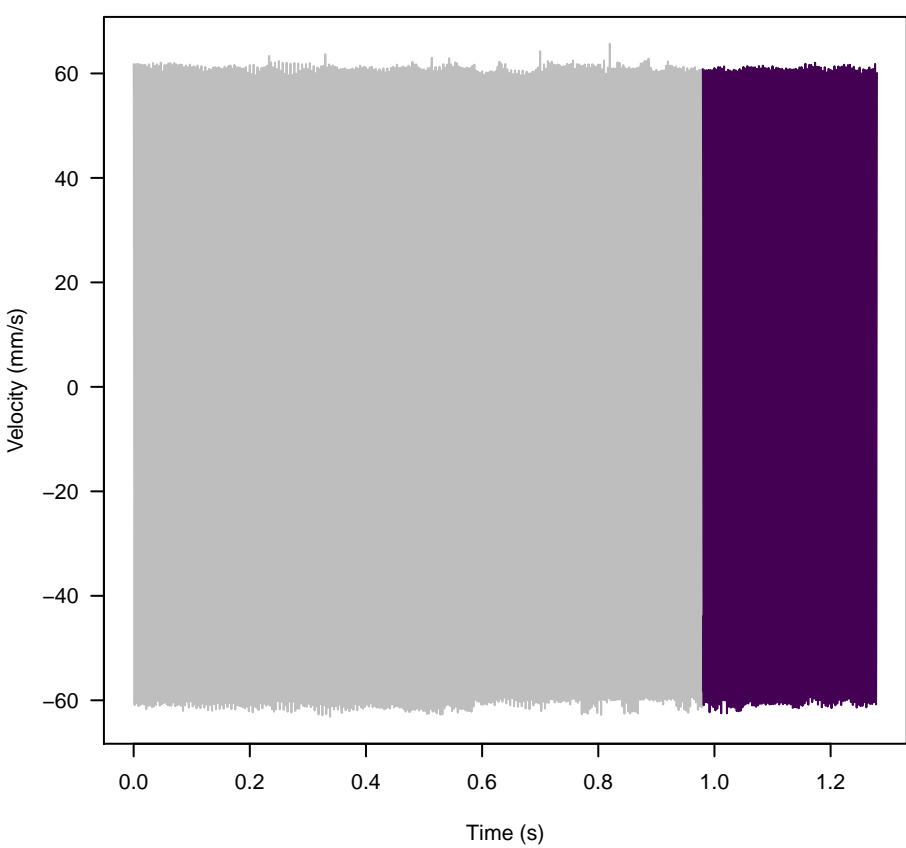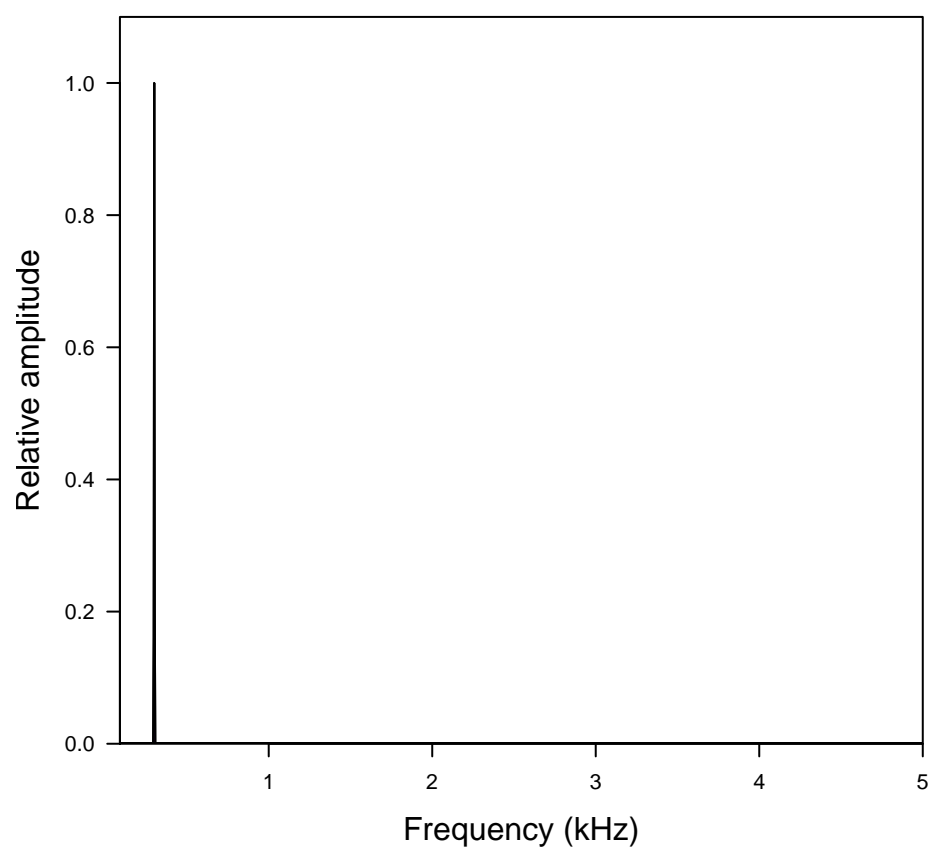

Vel. = 0.014 ; Str. = Receptacle ; Axis = z ; Fl. accession = 10-s-81-1AA

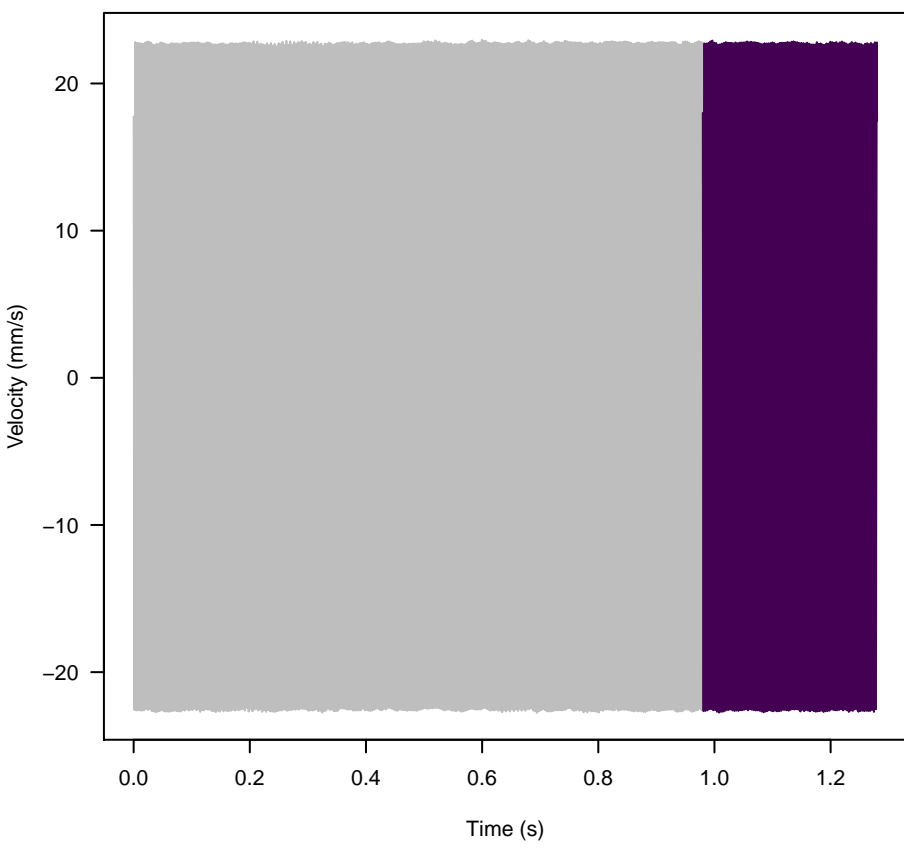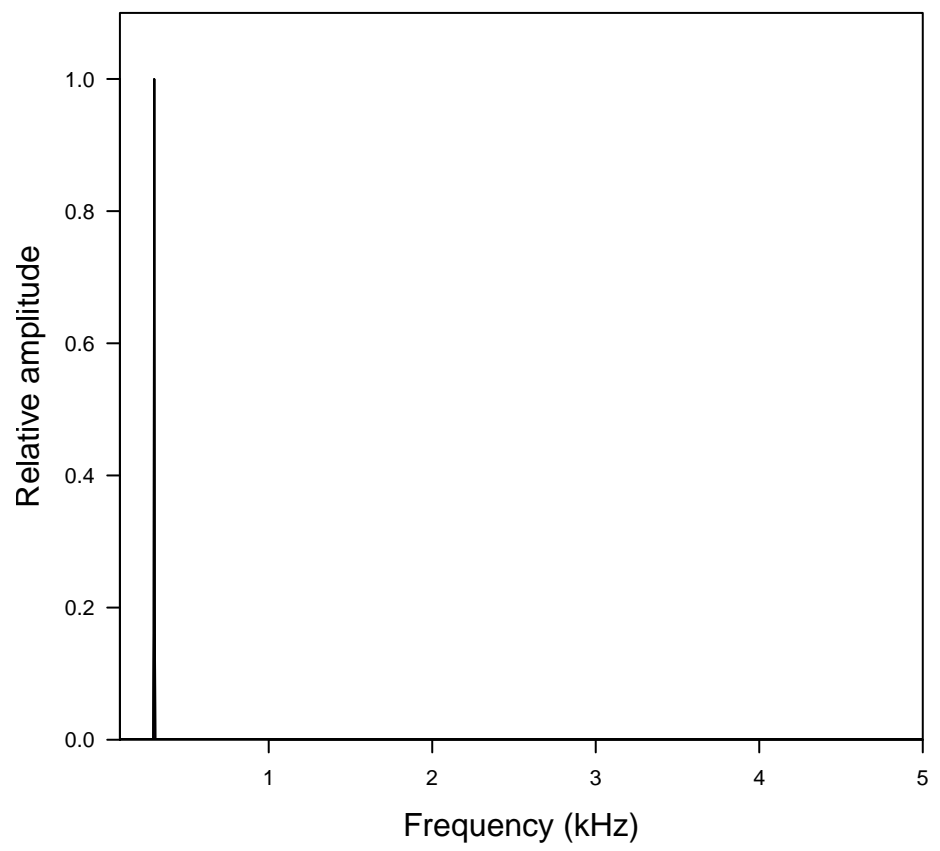

Vel. = 0.014 ; Str. = PA ; Axis = z ; Fl. accession = 10-s-81-1AA

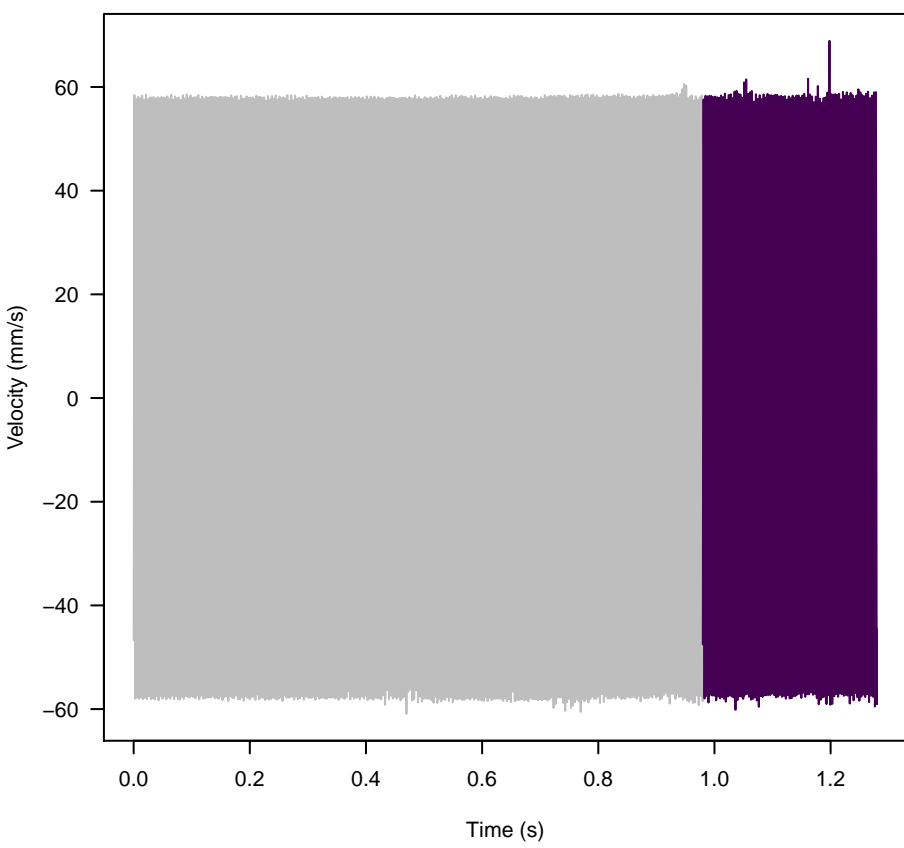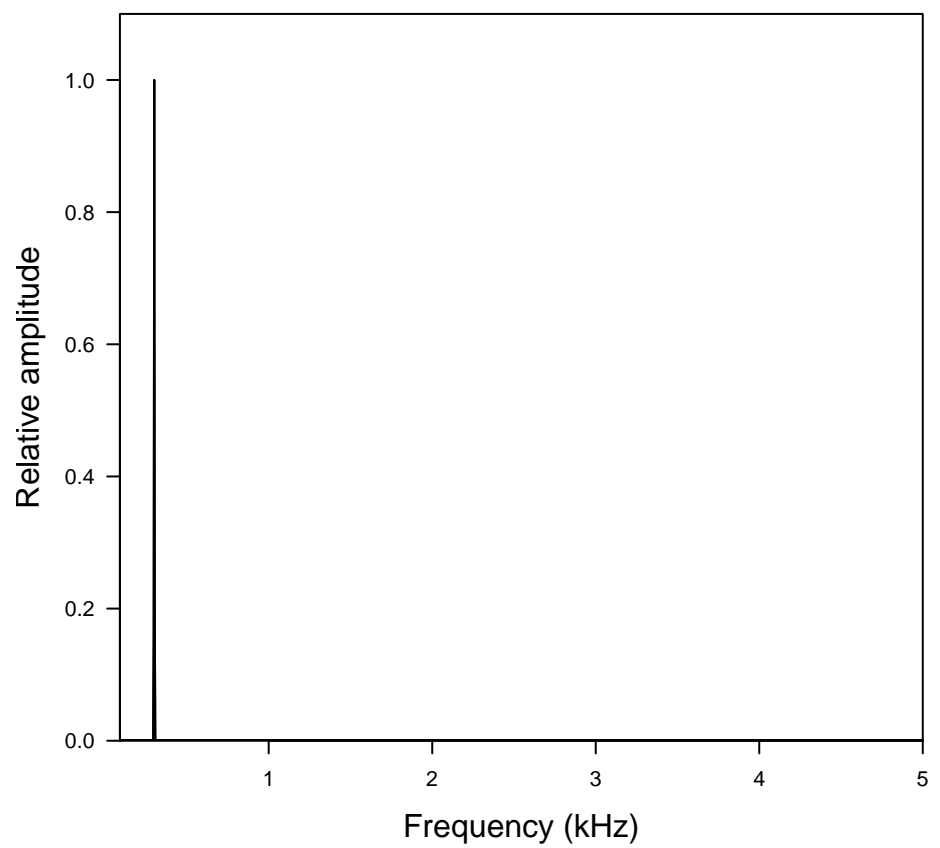

Vel. = 0.014 ; Str. = Receptacle ; Axis = z ; Fl. accession = 10-s-81-1AA

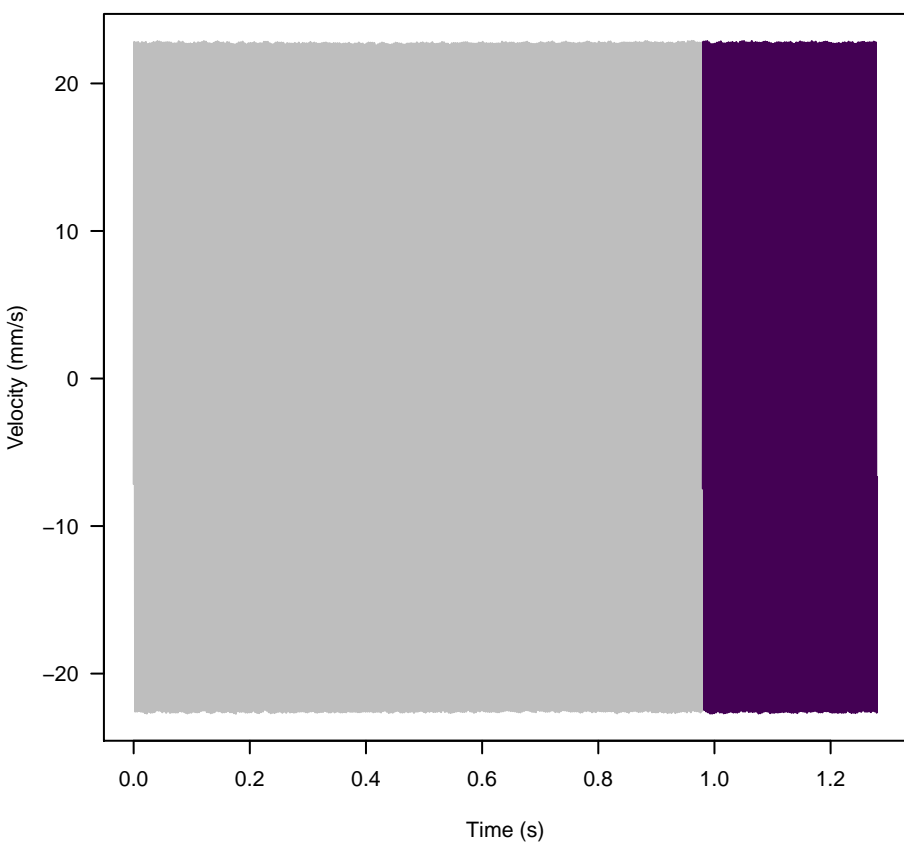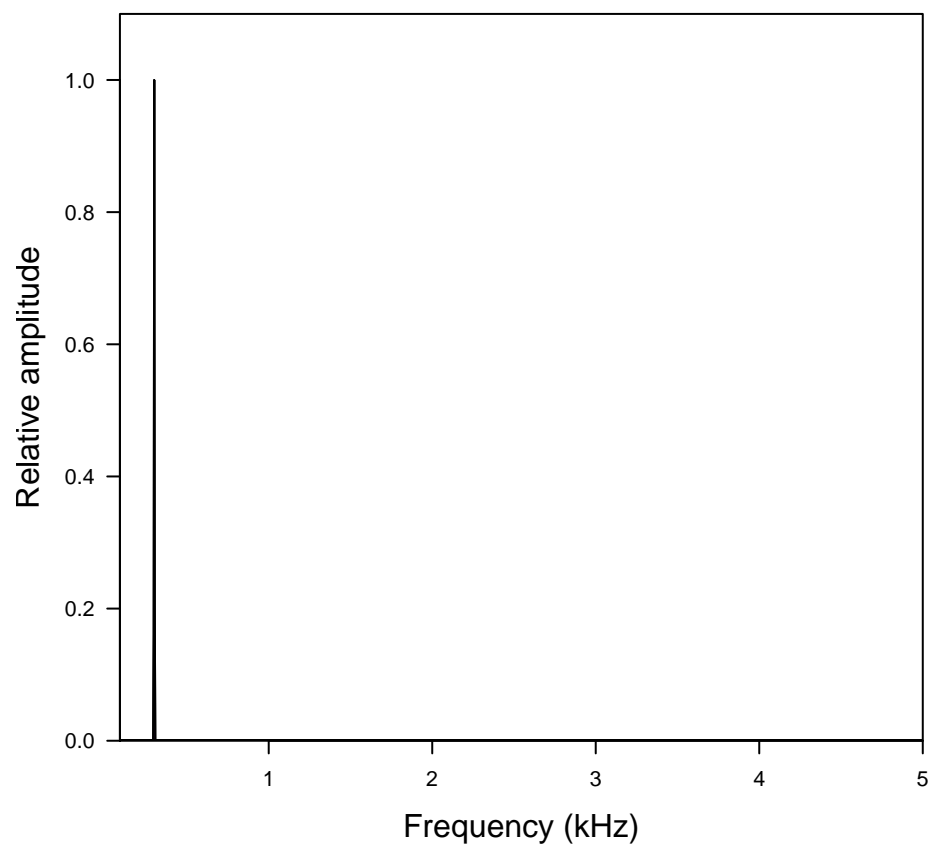

Vel. = 0.014 ; Str. = Corolla ; Axis = y ; Fl. accession = 10-s-81-1AA

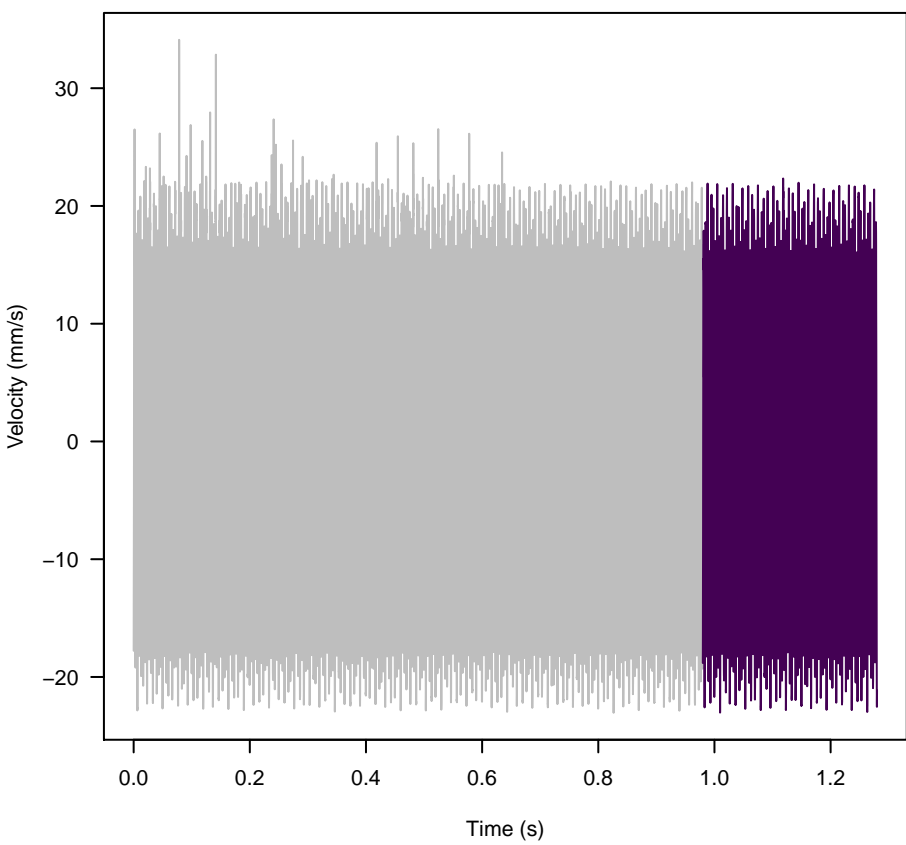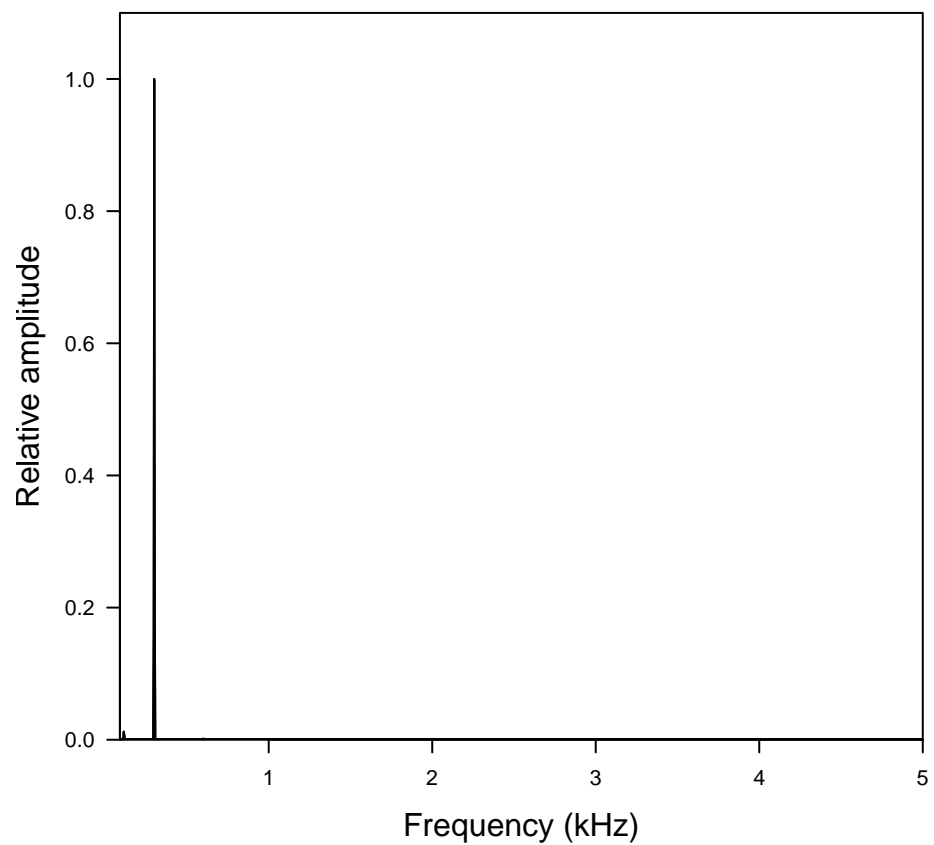

Vel. = 0.014 ; Str. = Receptacle ; Axis = y ; Fl. accession = 10-s-81-1AA

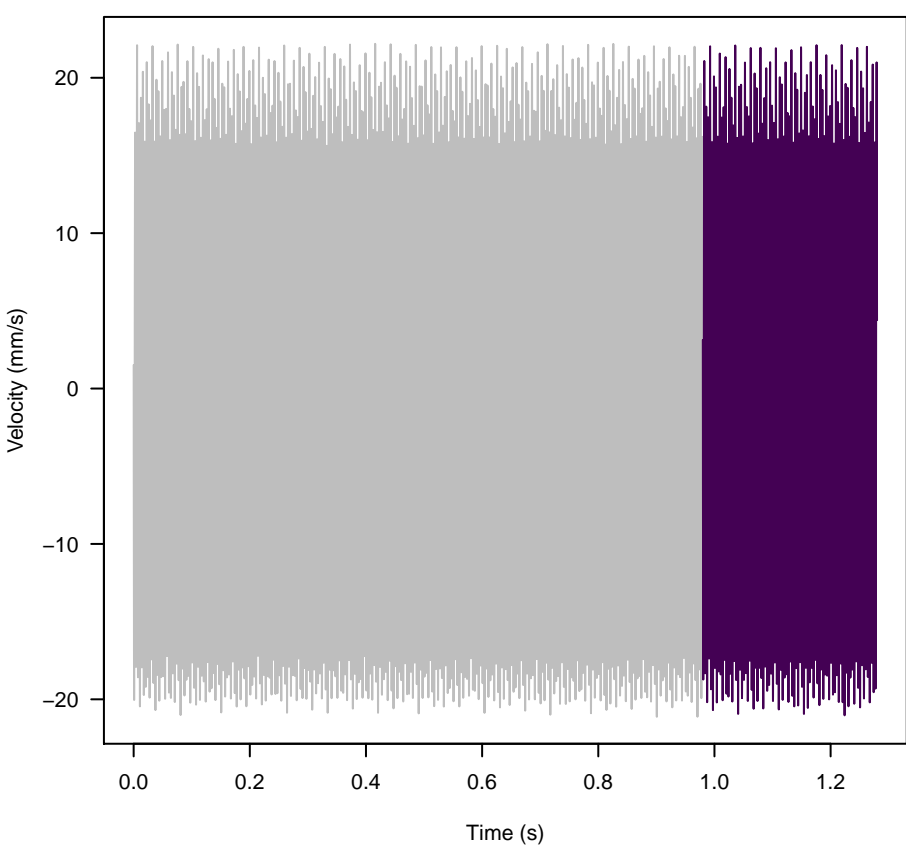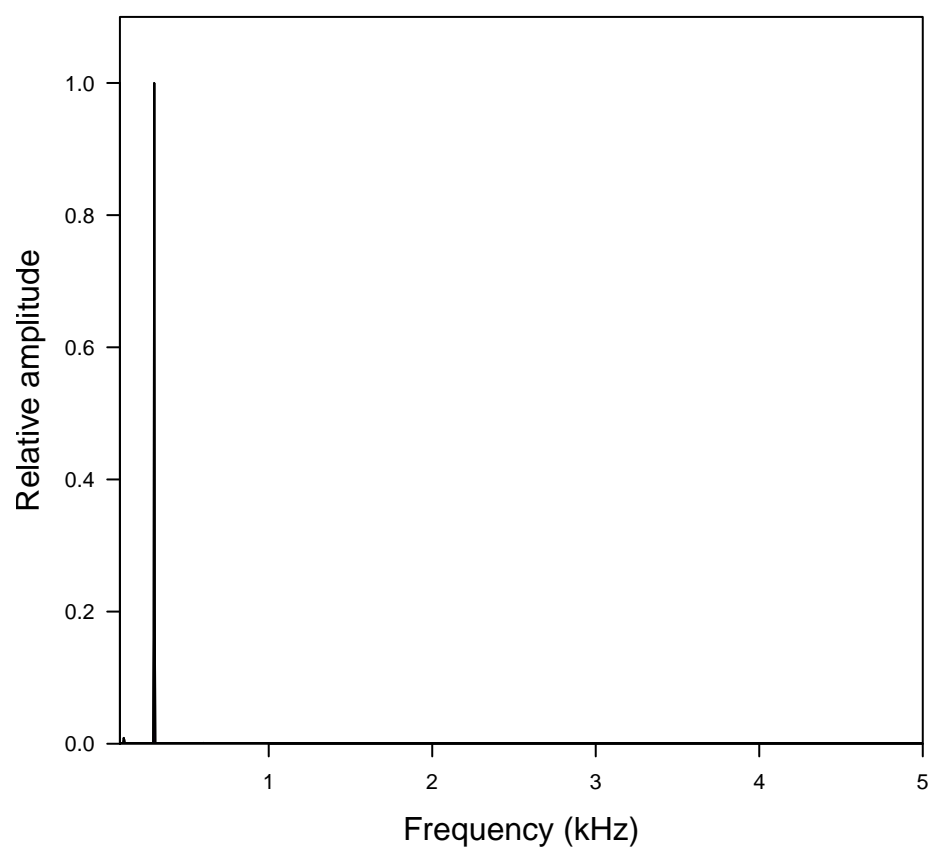

Vel. = 0.014 ; Str. = FA ; Axis = y ; Fl. accession = 10-s-81-1AA

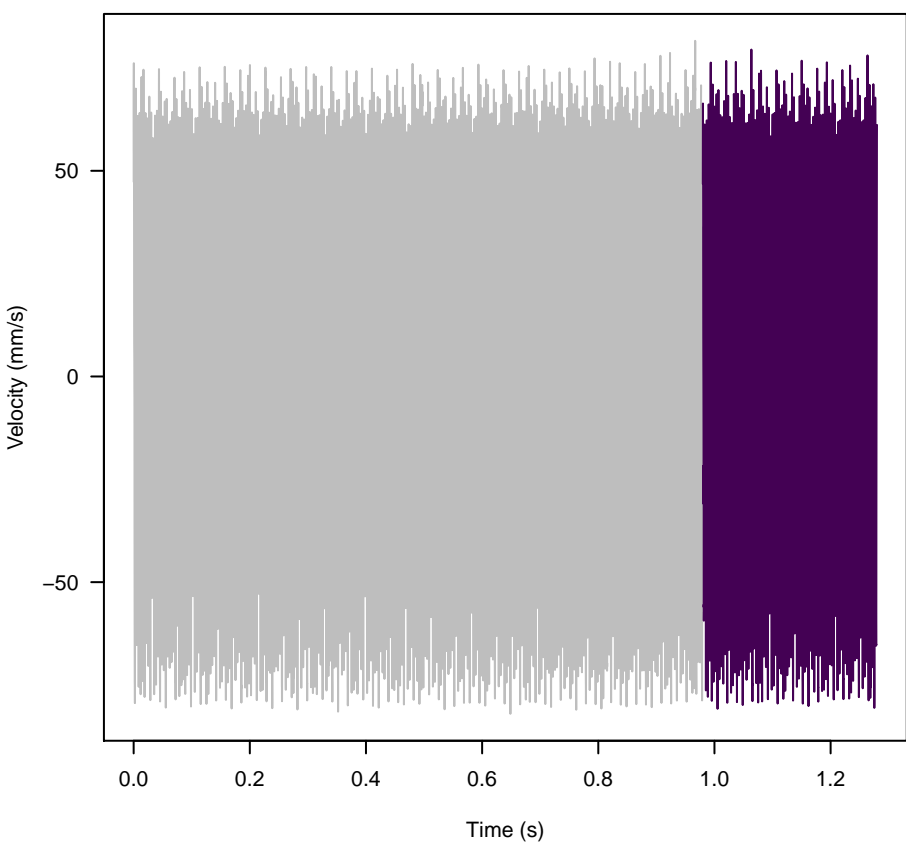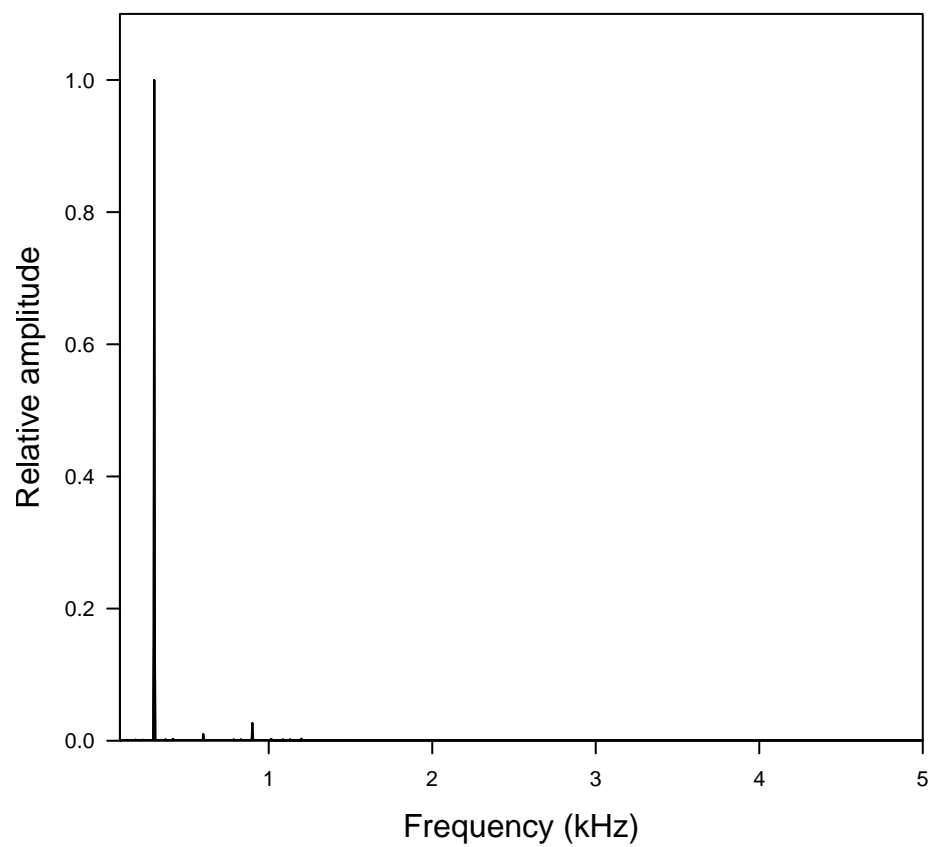

Vel. = 0.014 ; Str. = Receptacle ; Axis = y ; Fl. accession = 10-s-81-1AA

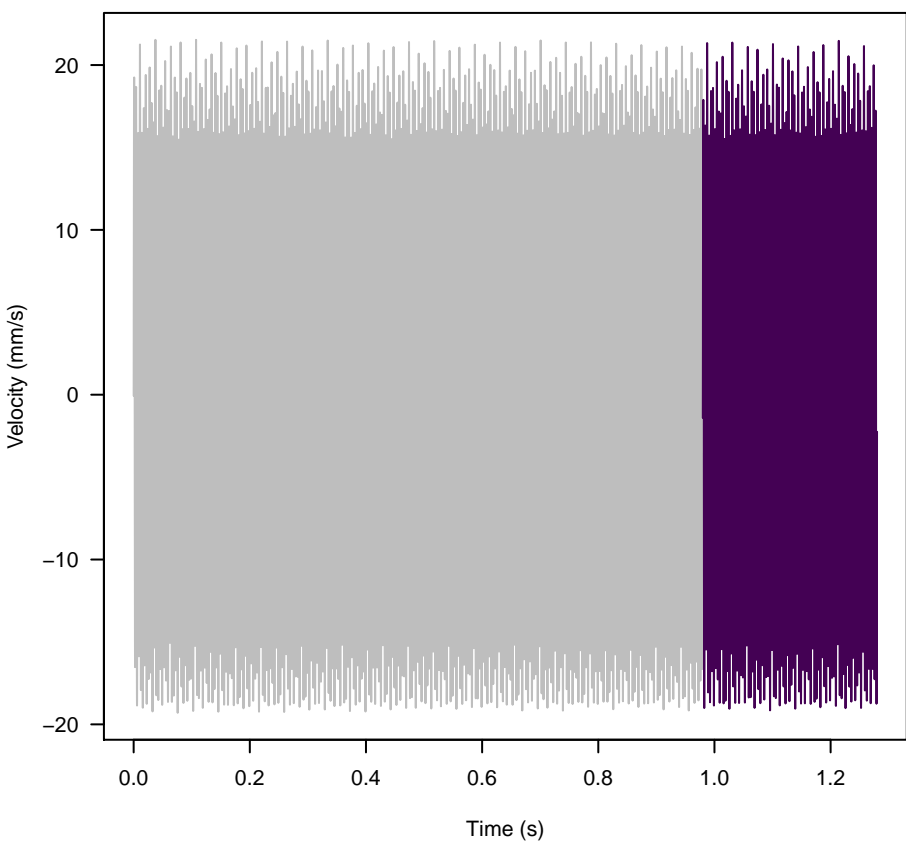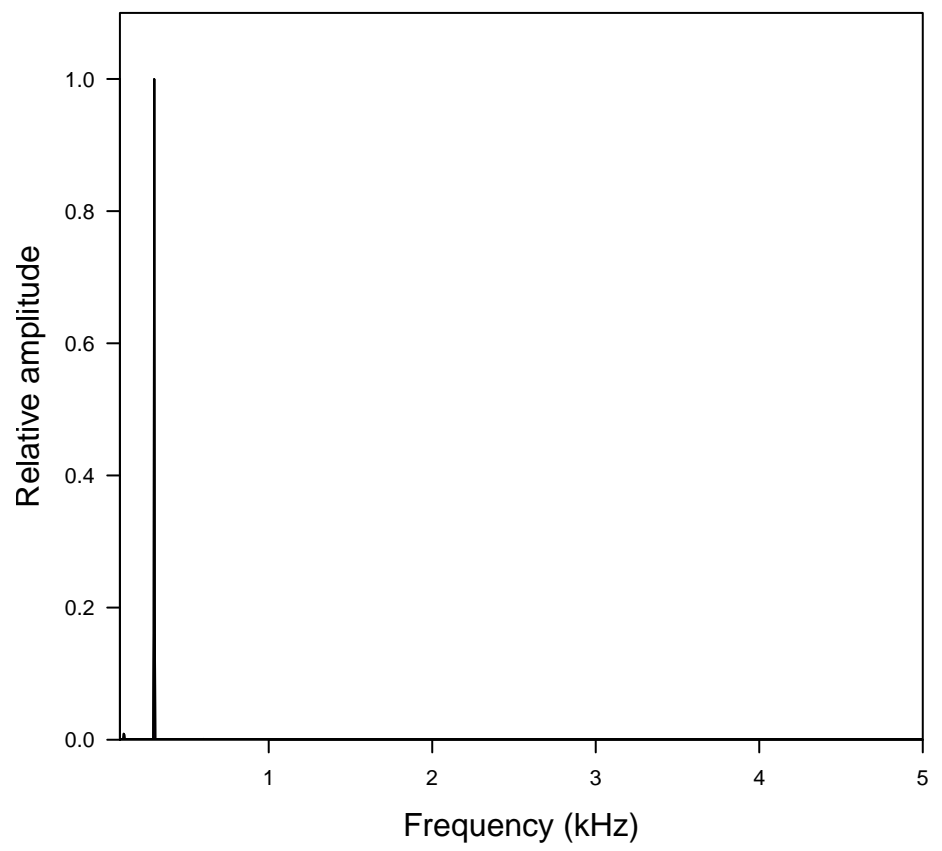

Vel. = 0.014 ; Str. = PA ; Axis = y ; Fl. accession = 10-s-81-1AA

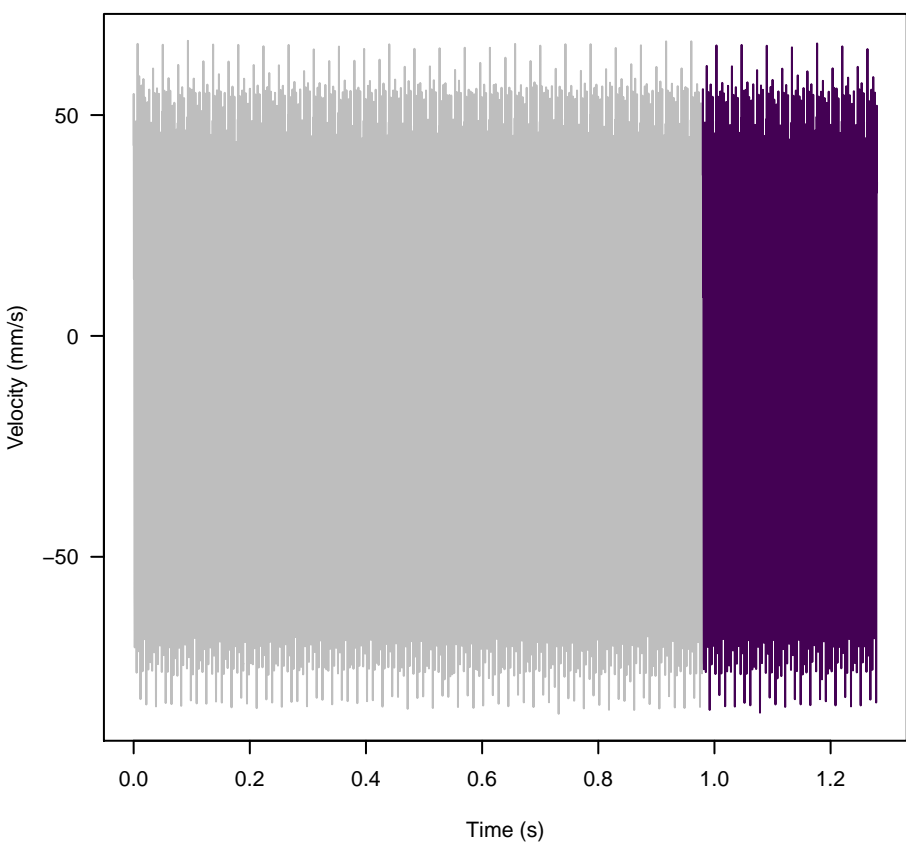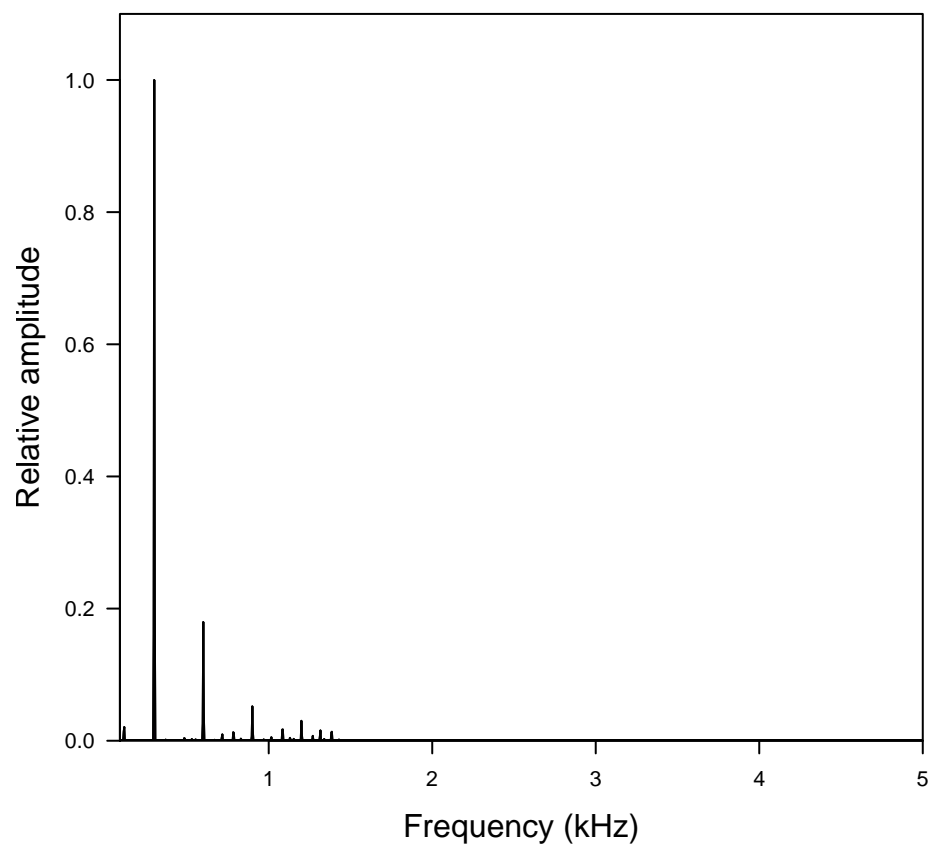

Vel. = 0.014 ; Str. = Receptacle ; Axis = y ; Fl. accession = 10-s-81-1AA

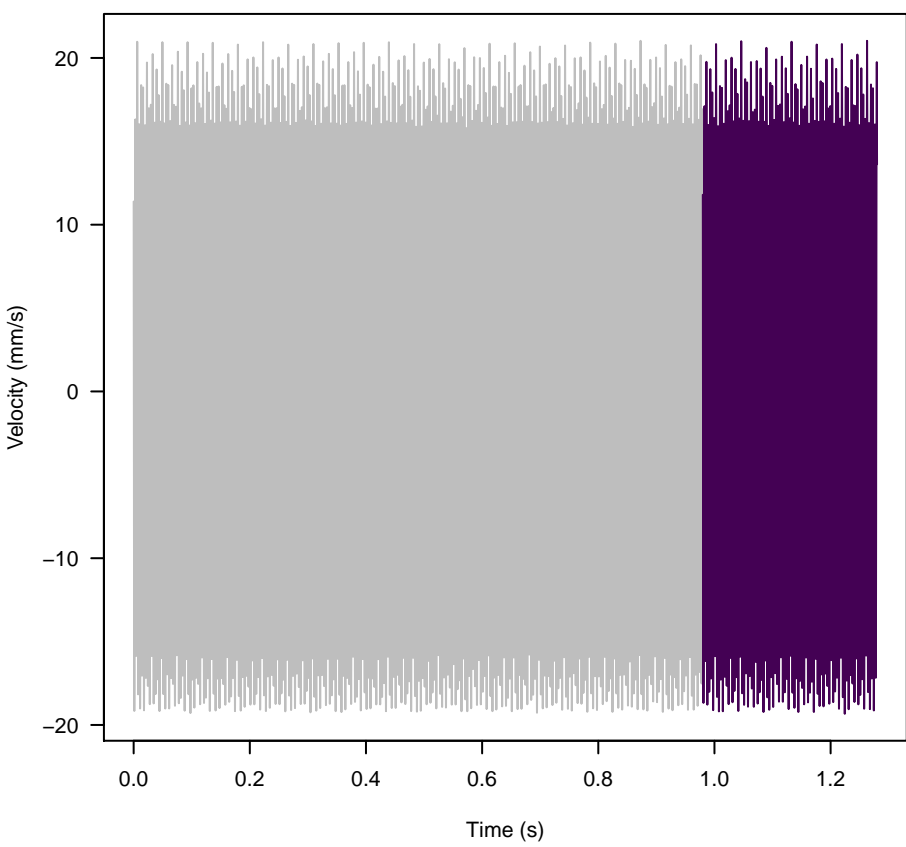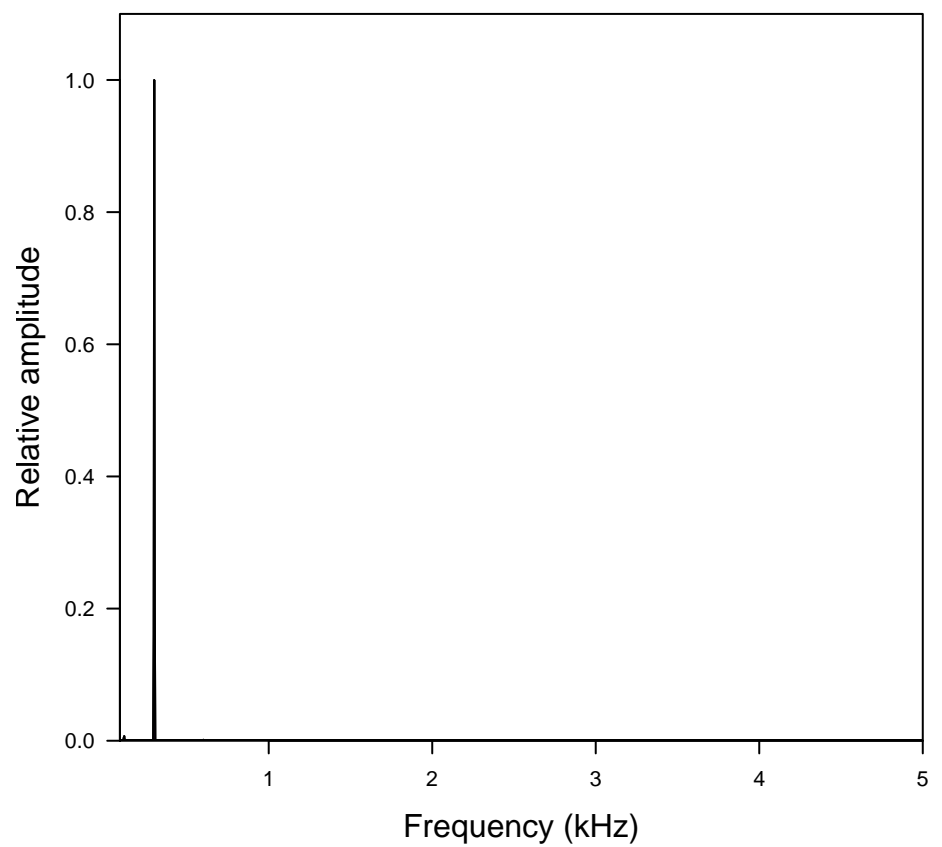

Vel. = 0.028 ; Str. = PA ; Axis = y ; Fl. accession = 10-s-81-1AA

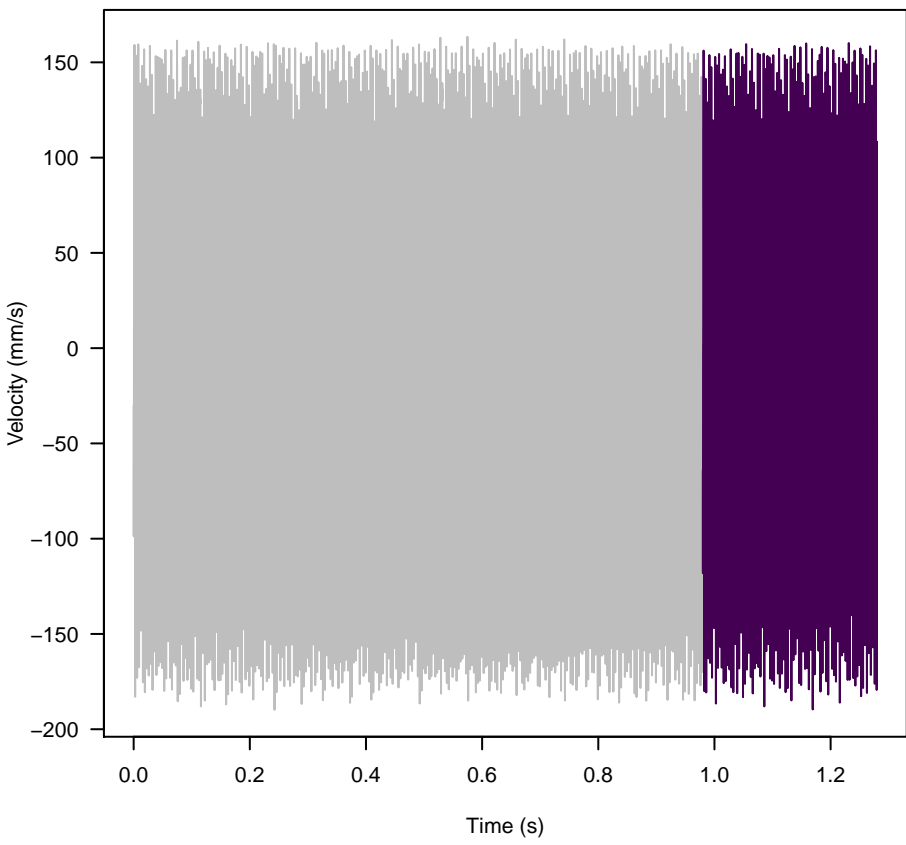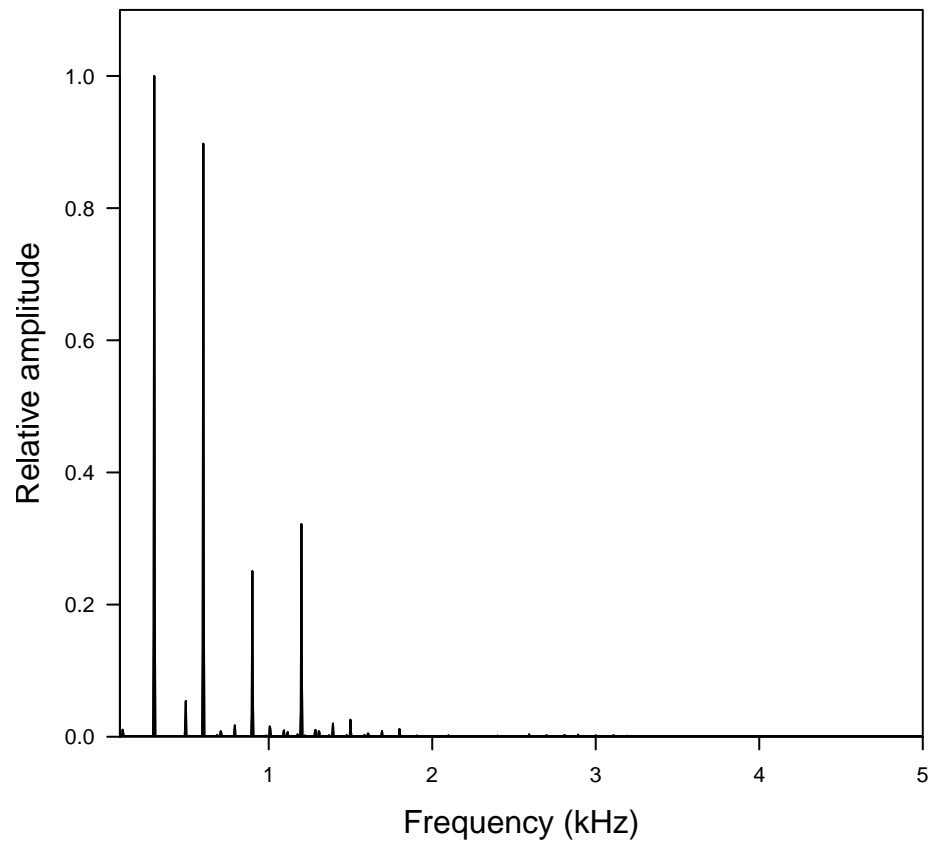

Vel. = 0.028 ; Str. = Receptacle ; Axis = y ; Fl. accession = 10-s-81-1AA

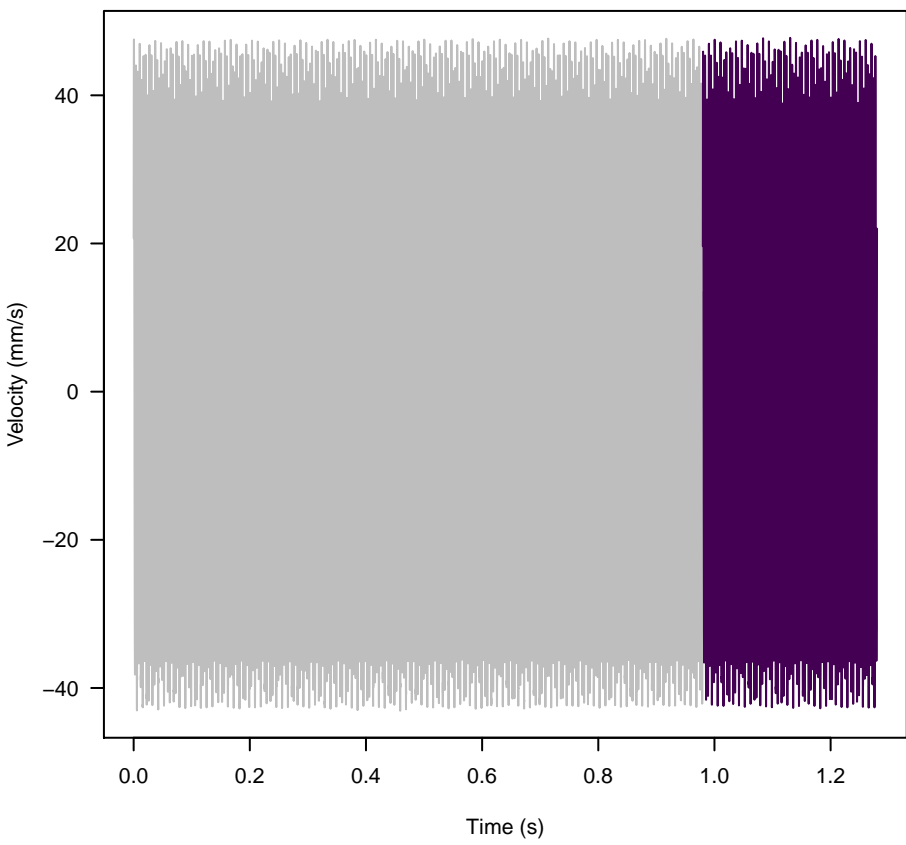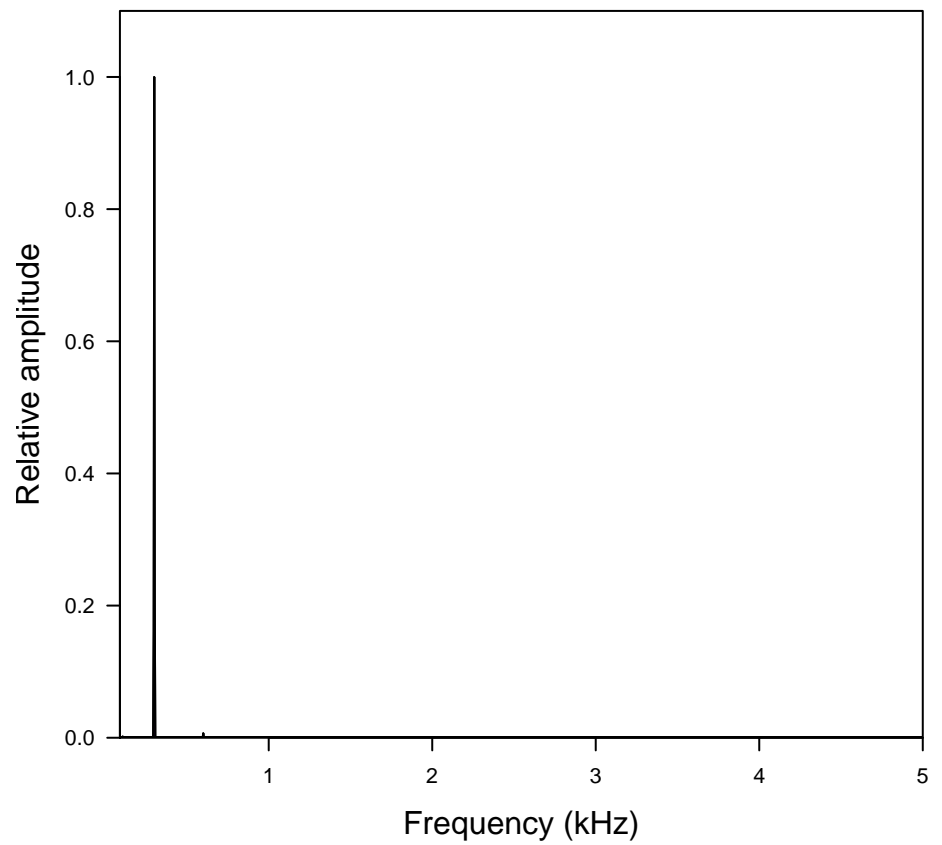

Vel. = 0.028 ; Str. = FA ; Axis = y ; Fl. accession = 10-s-81-1AA

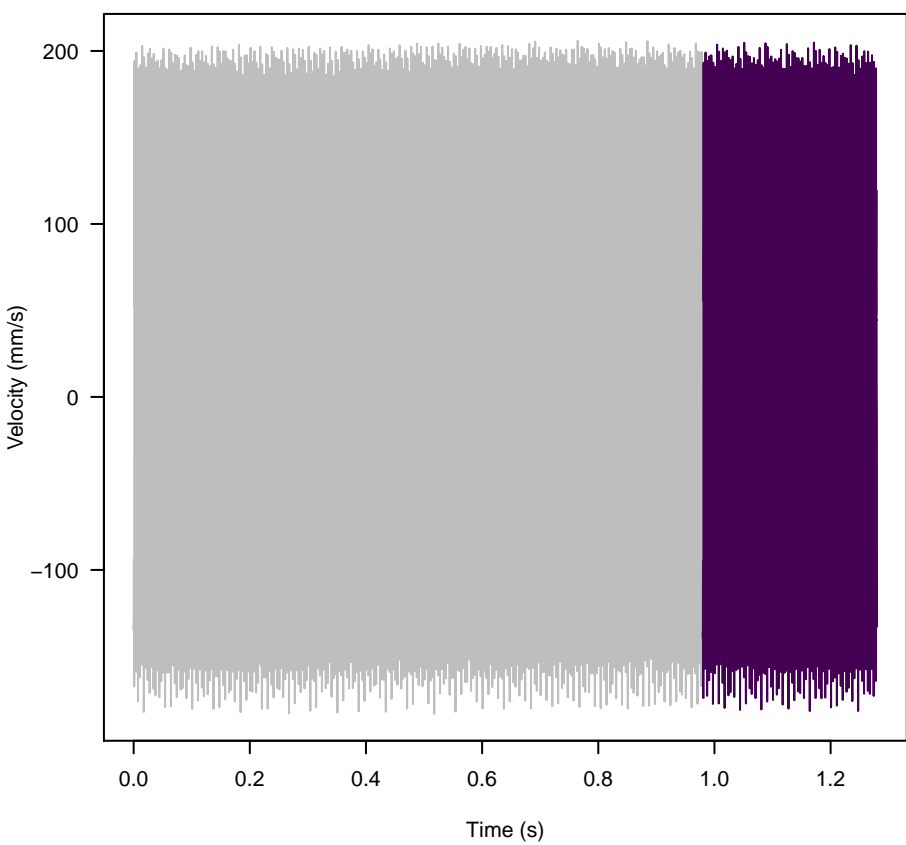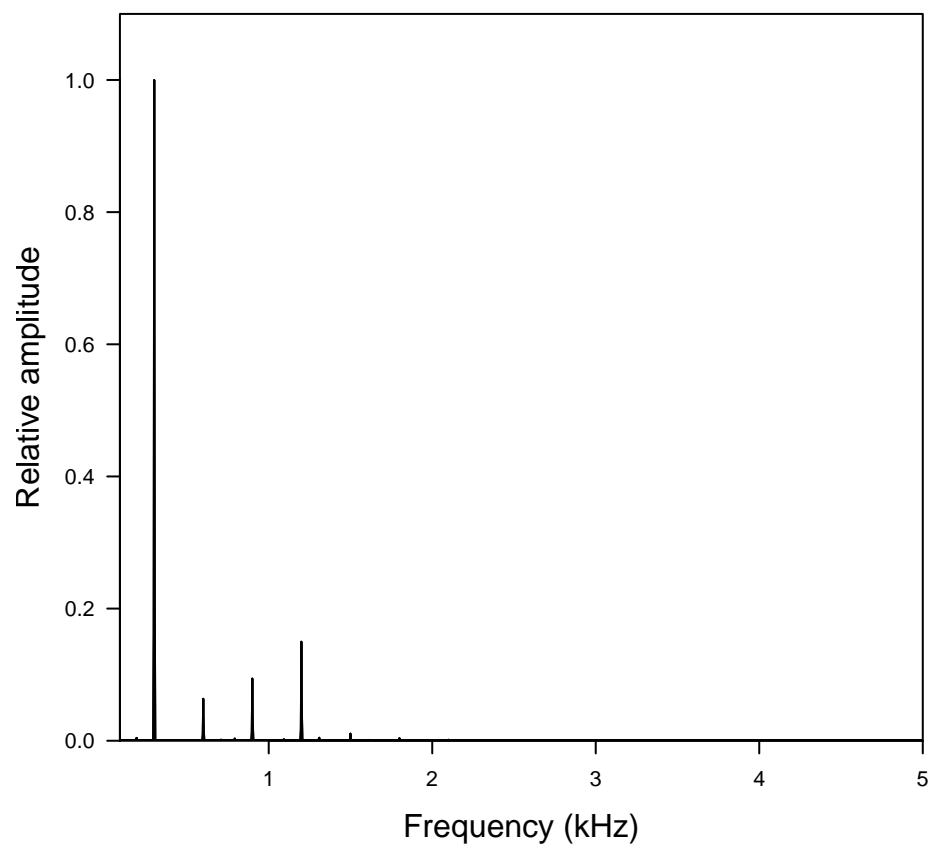

Vel. = 0.028 ; Str. = Receptacle ; Axis = y ; Fl. accession = 10-s-81-1AA

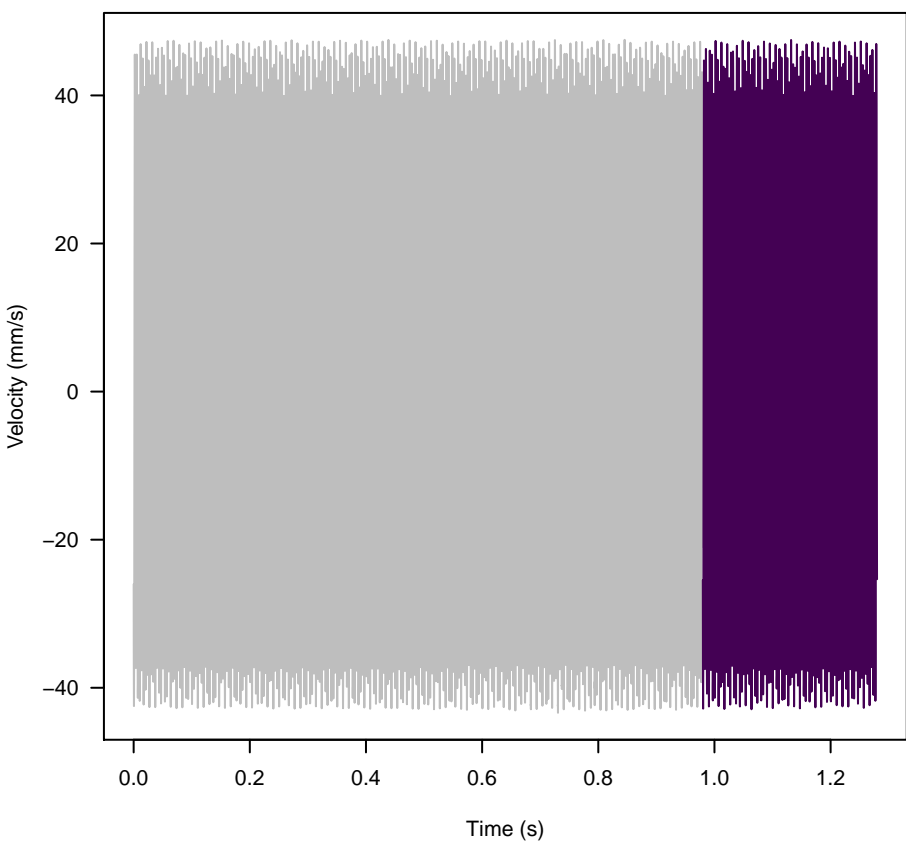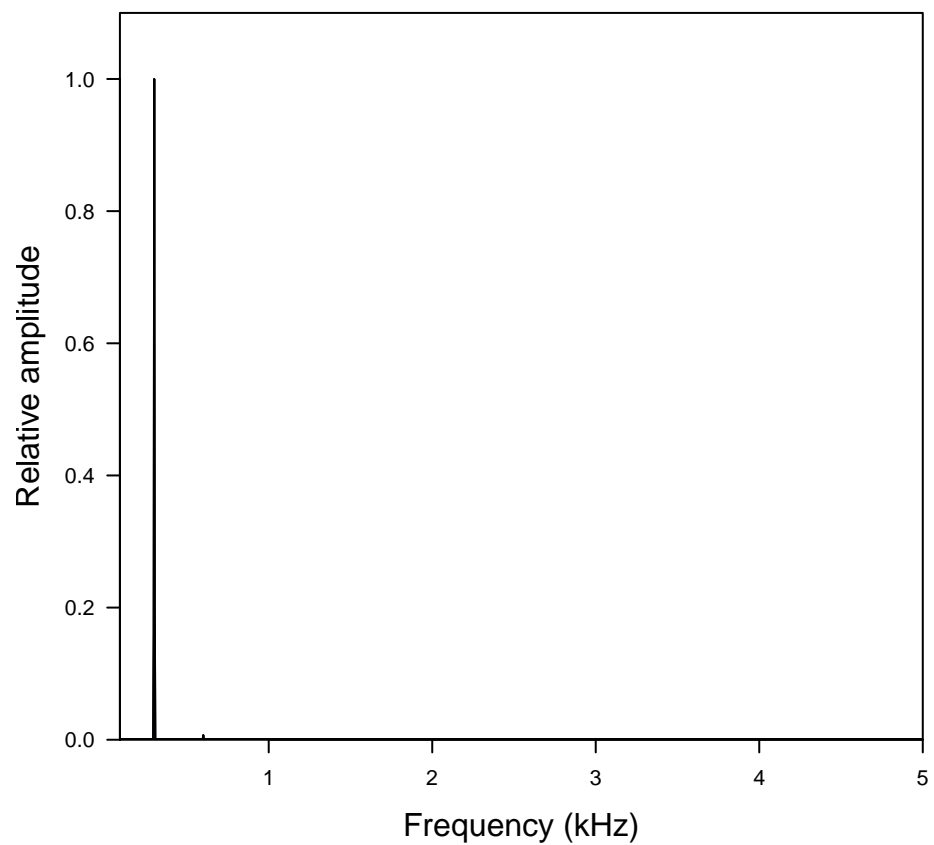

Vel. = 0.028 ; Str. = Corolla ; Axis = y ; Fl. accession = 10-s-81-1AA

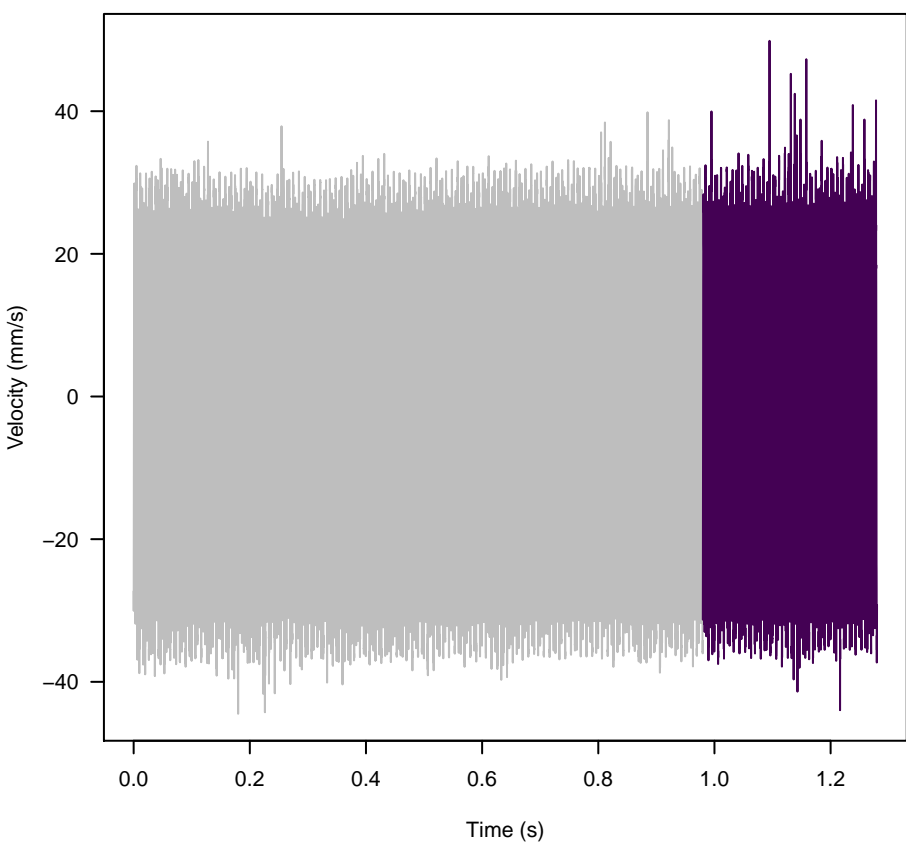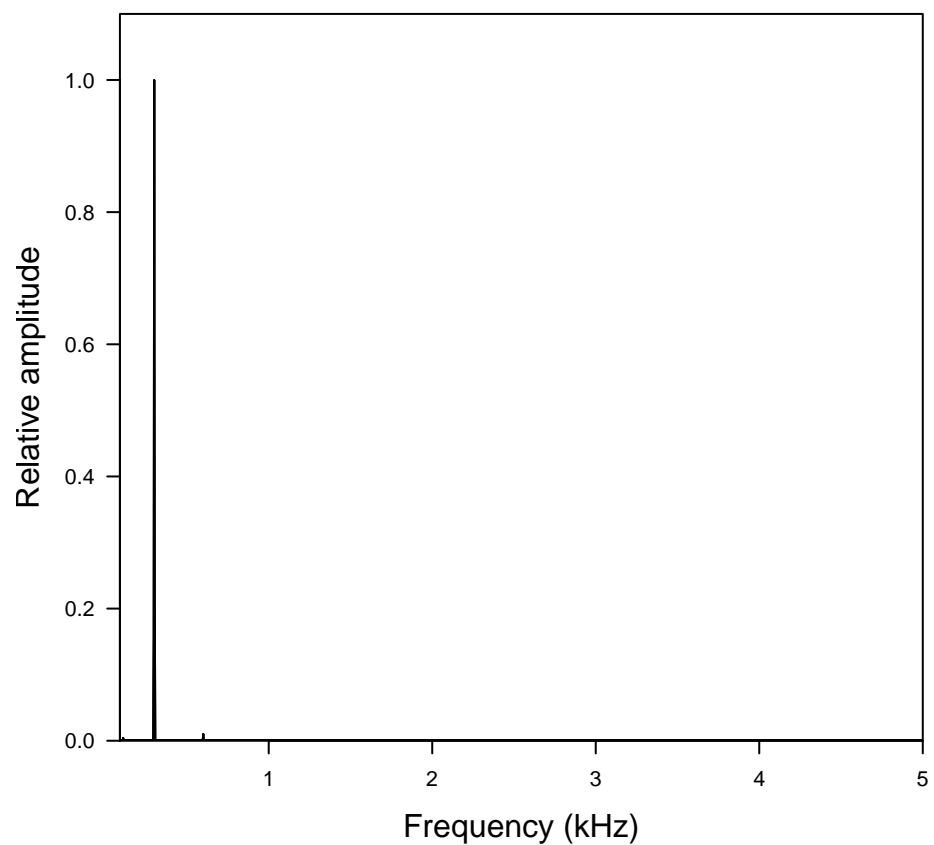

Vel. = 0.028 ; Str. = Receptacle ; Axis = y ; Fl. accession = 10-s-81-1AA

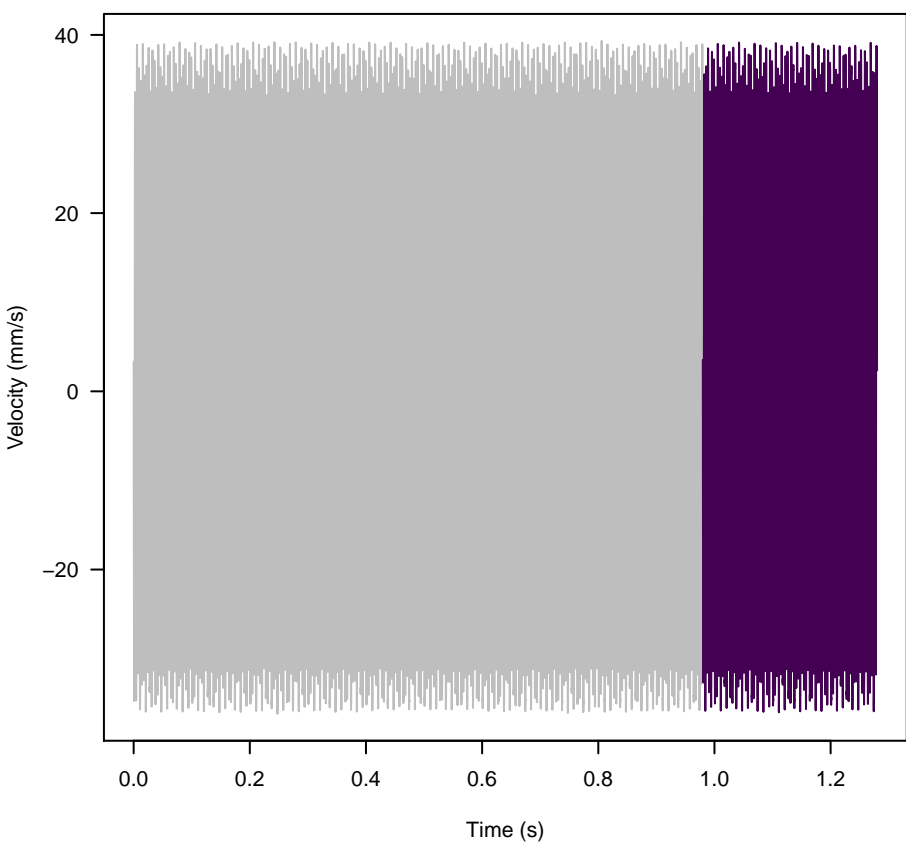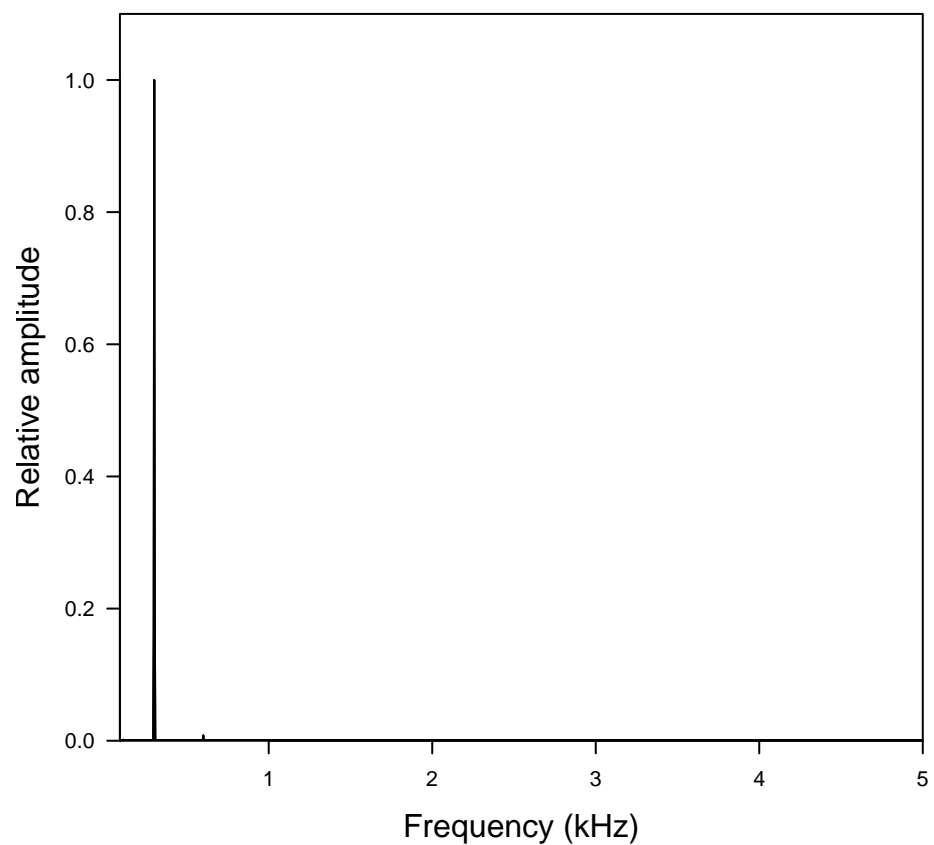



Vel. = 0.057 ; Str. = Corolla ; Axis = y ; Fl. accession = 10-s-81-1AA

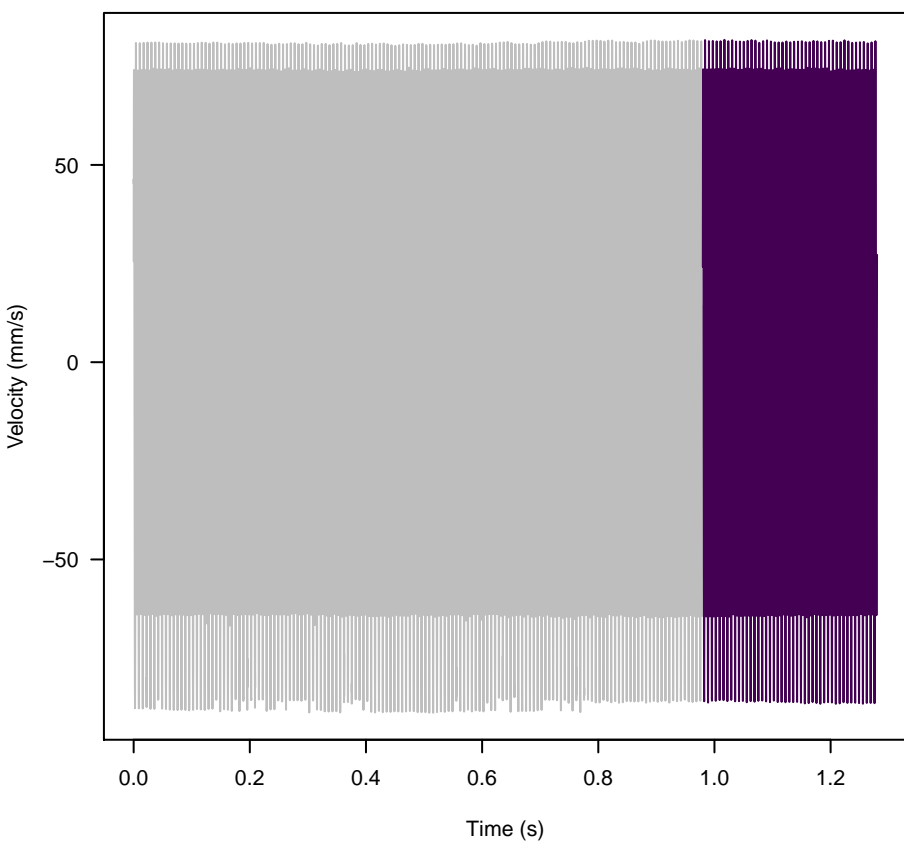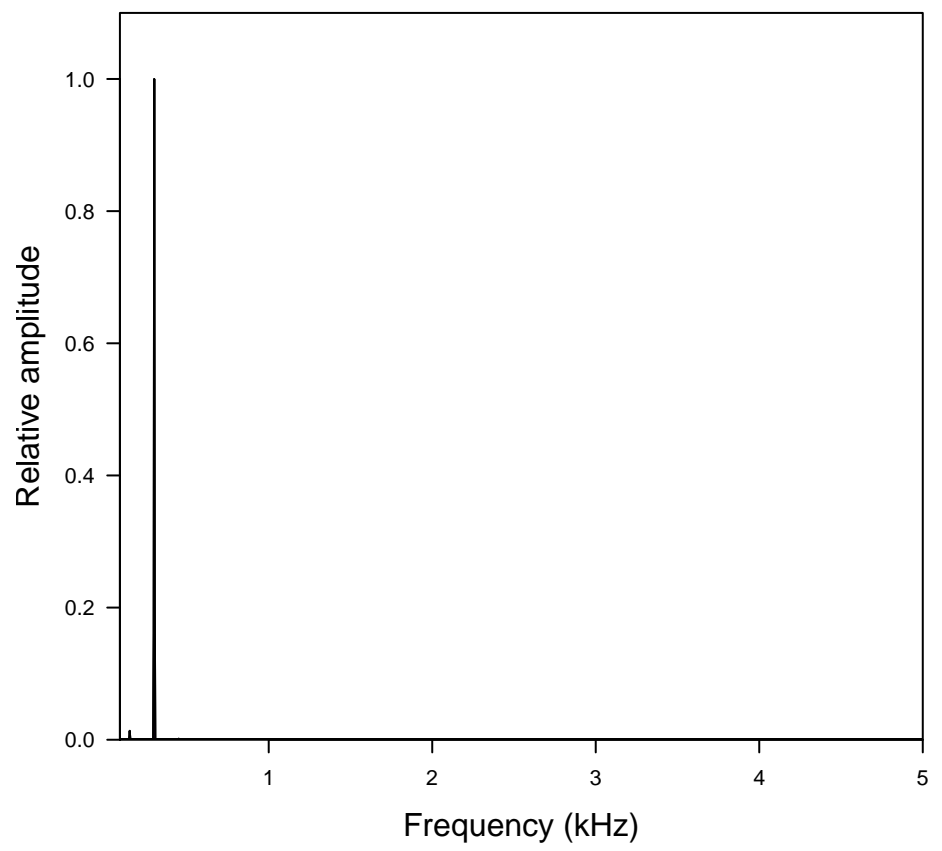

Vel. = 0.057 ; Str. = Receptacle ; Axis = y ; Fl. accession = 10-s-81-1AA

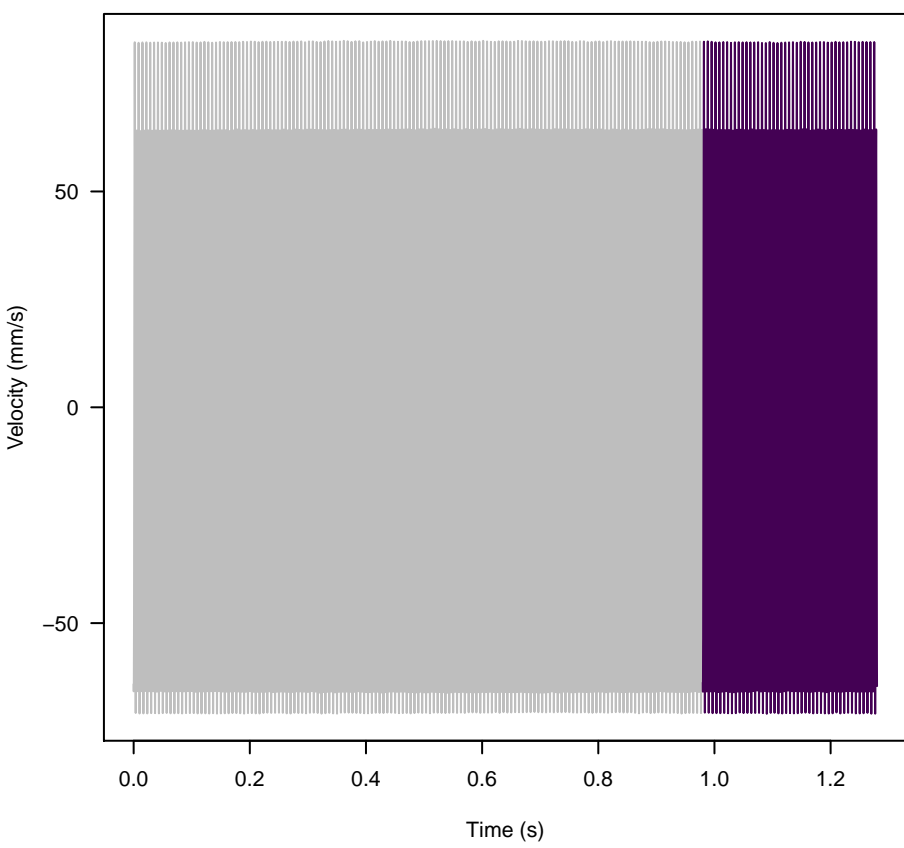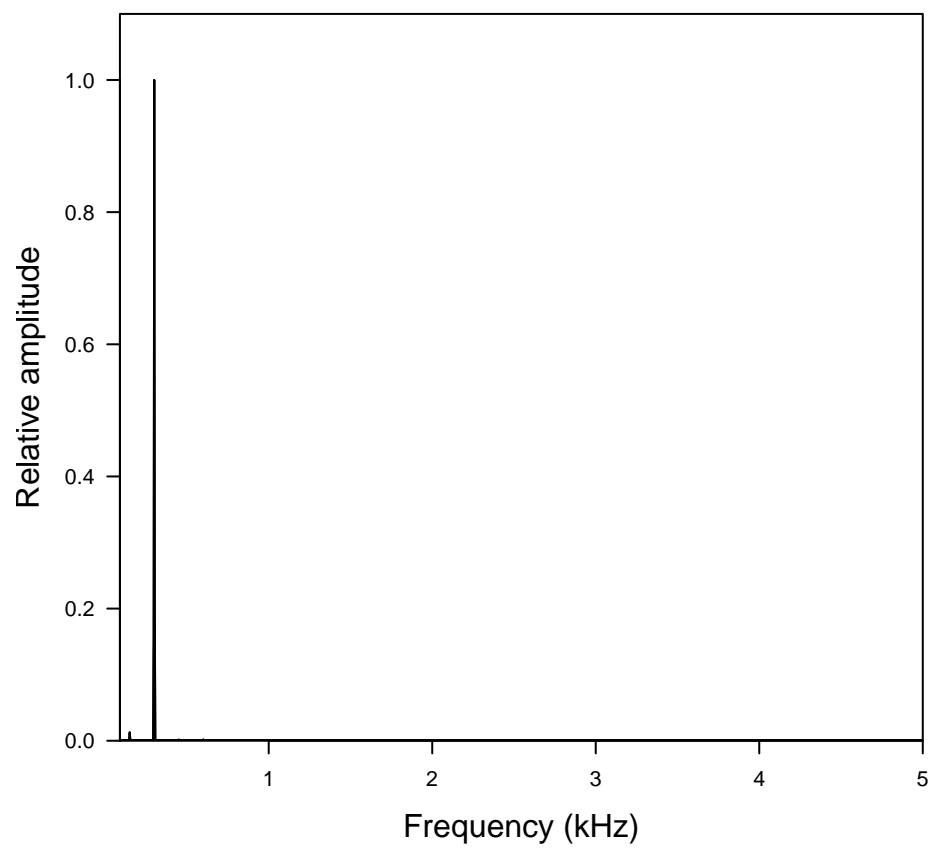

Vel. = 0.057 ; Str. = FA ; Axis = y ; Fl. accession = 10-s-81-1AA

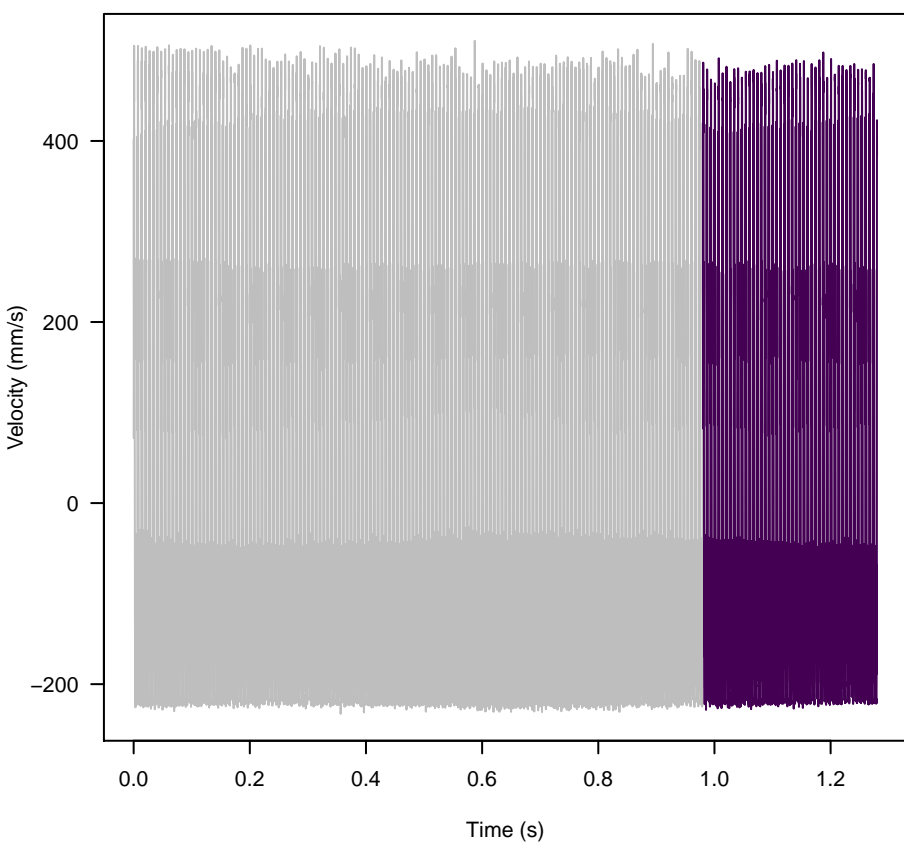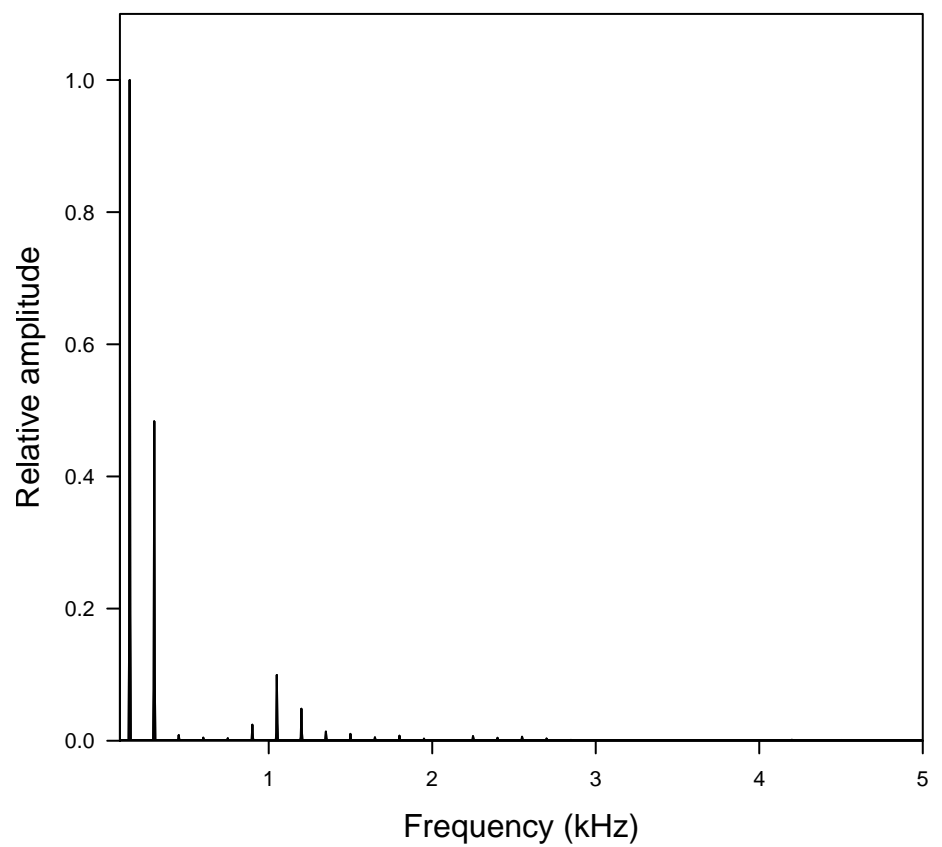

Vel. = 0.057 ; Str. = Receptacle ; Axis = y ; Fl. accession = 10-s-81-1AA

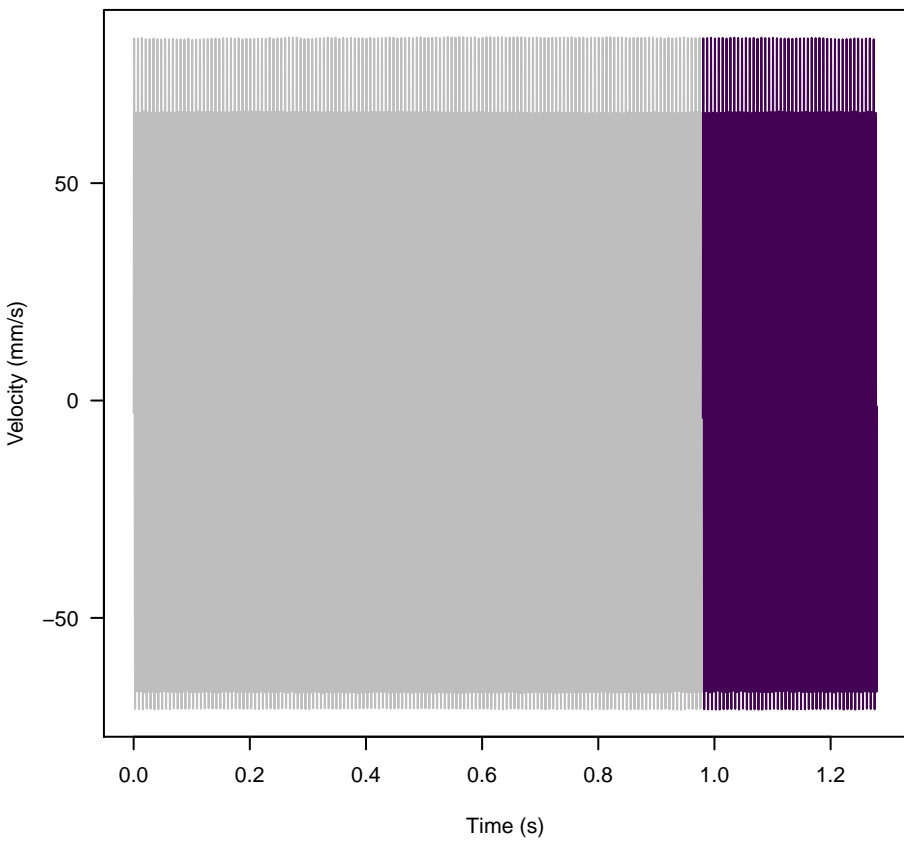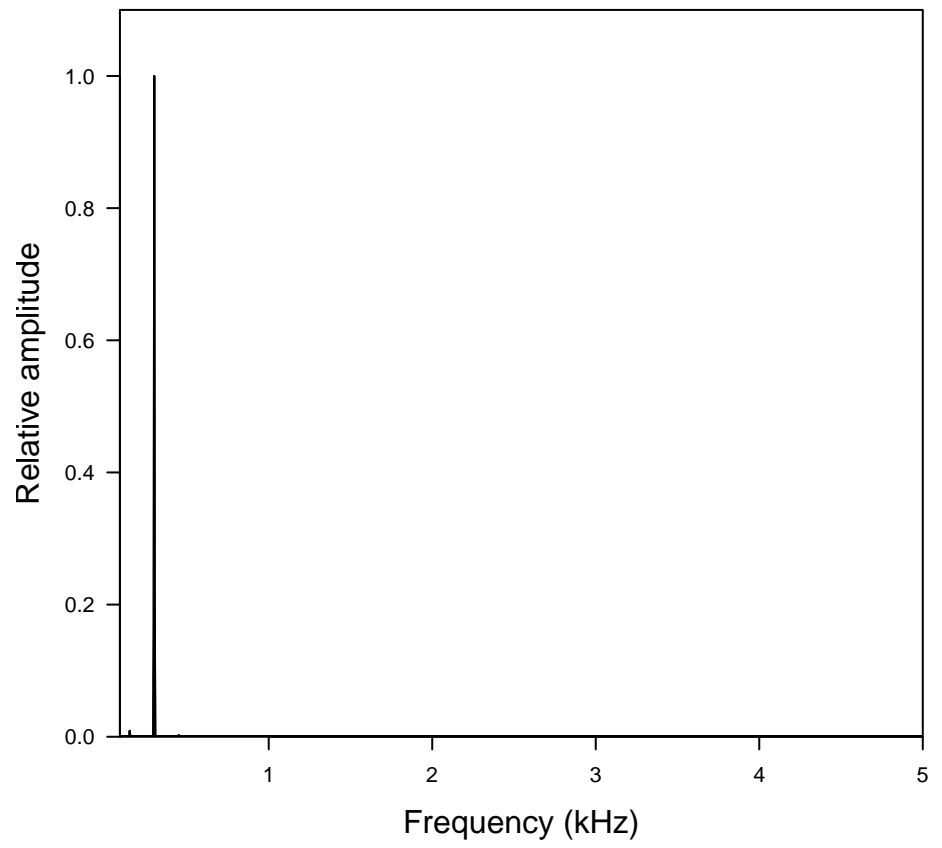

Vel. = 0.057 ; Str. = PA ; Axis = y ; Fl. accession = 10-s-81-1AA

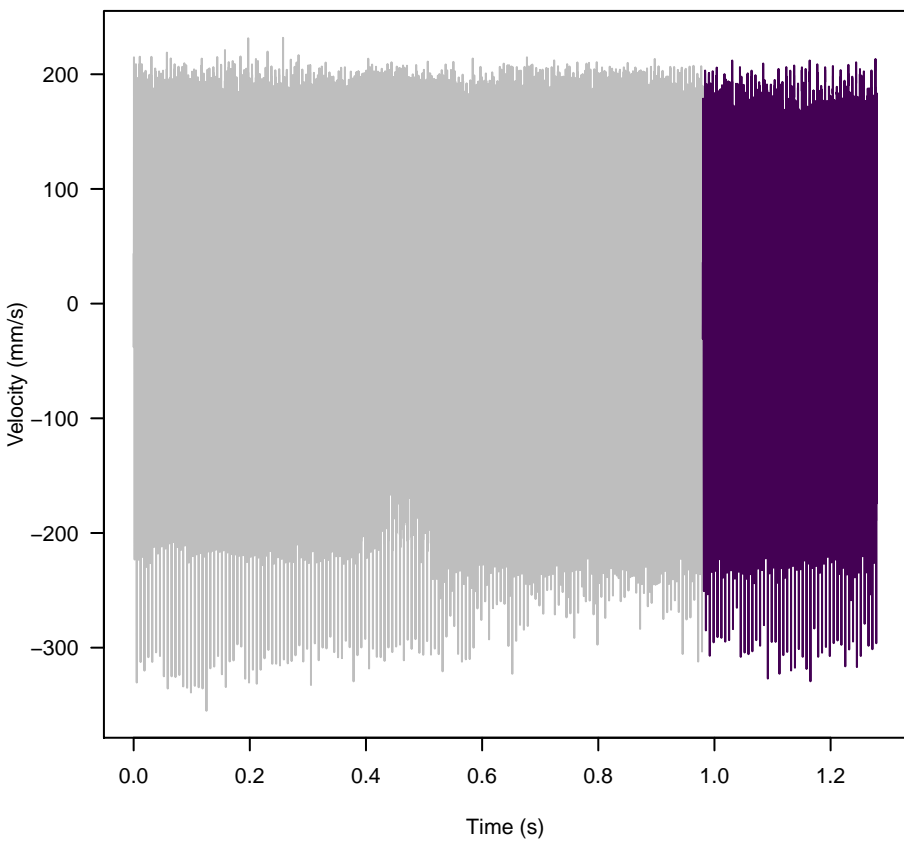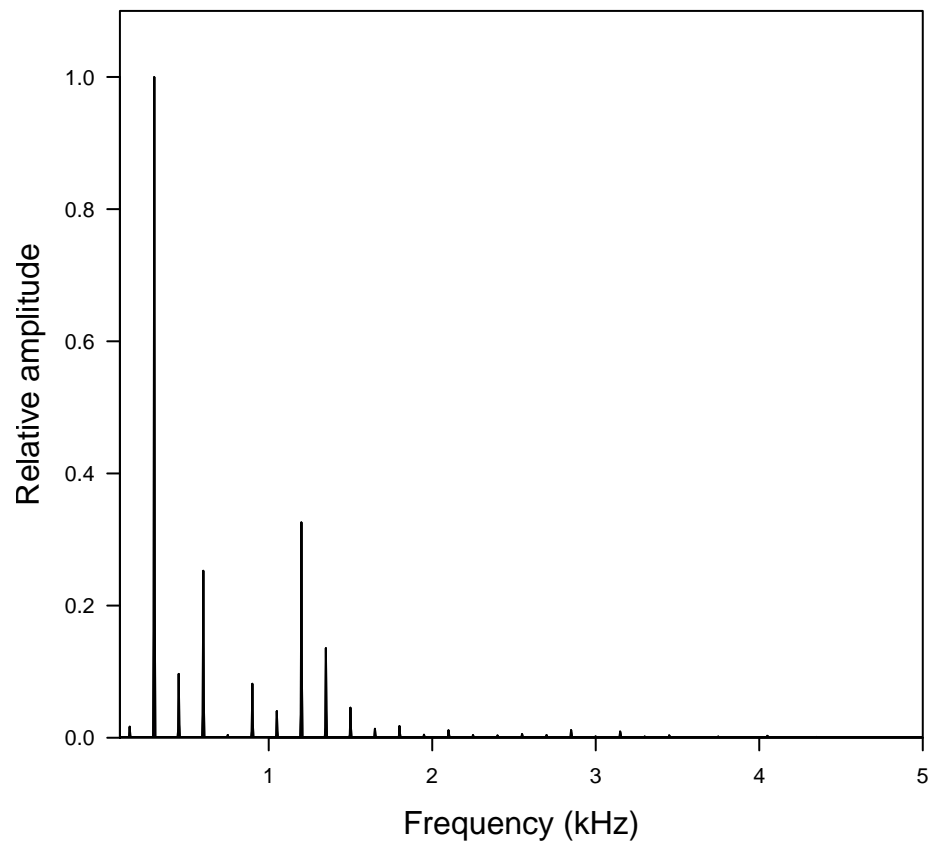

Vel. = 0.057 ; Str. = Receptacle ; Axis = y ; Fl. accession = 10-s-81-1AA

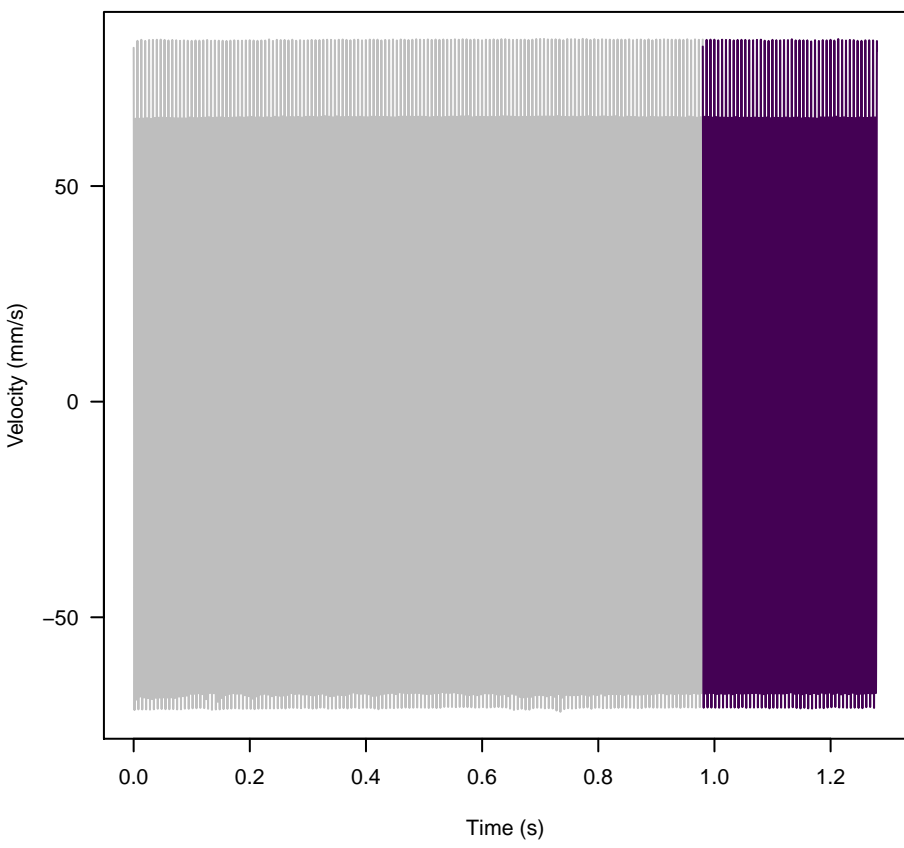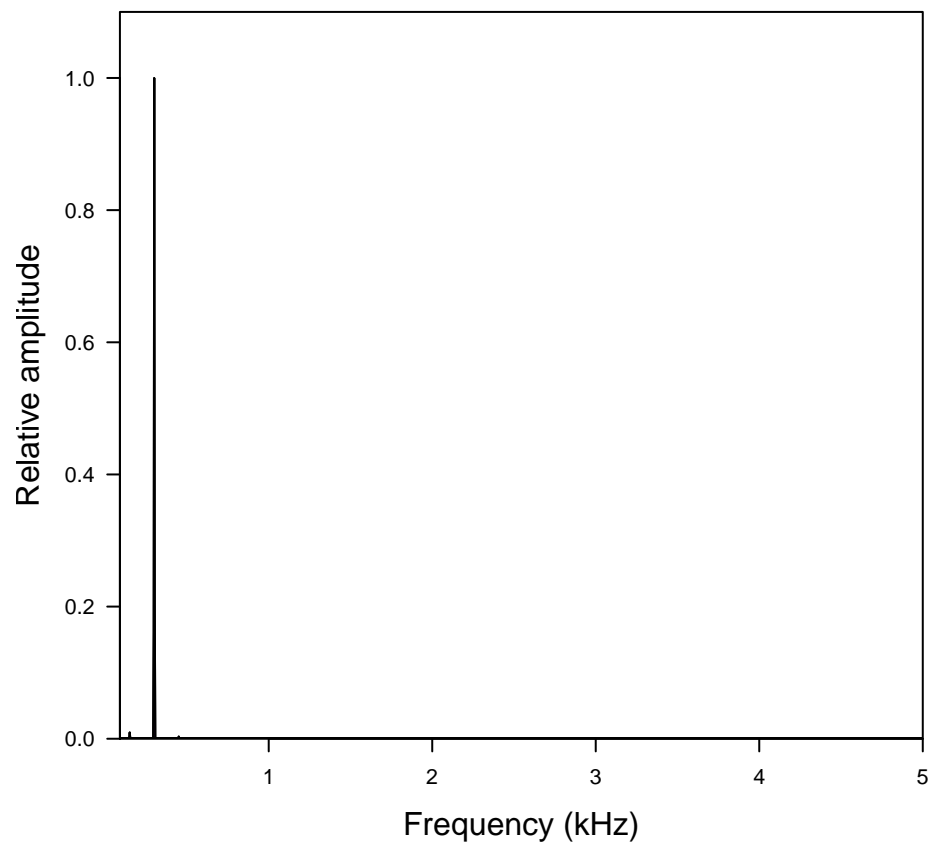

Vel. = 0.057 ; Str. = Corolla ; Axis = y ; Fl. accession = 10-s-81-1AB

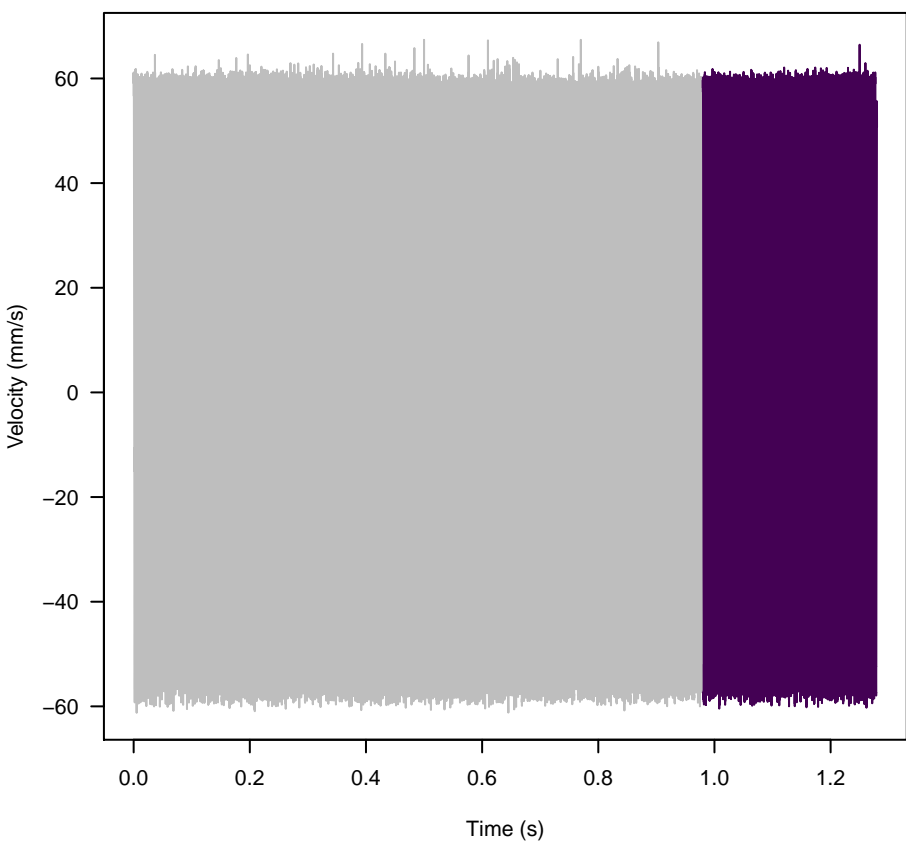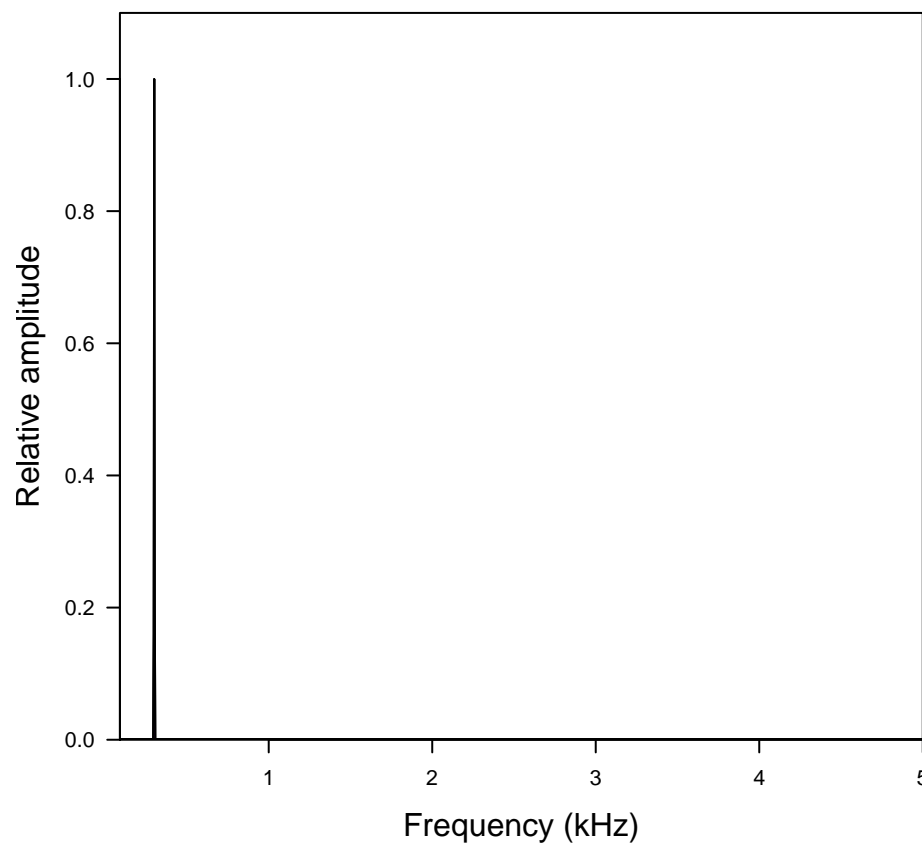

Vel. = 0.057 ; Str. = Receptacle ; Axis = y ; Fl. accession = 10-s-81-1AB

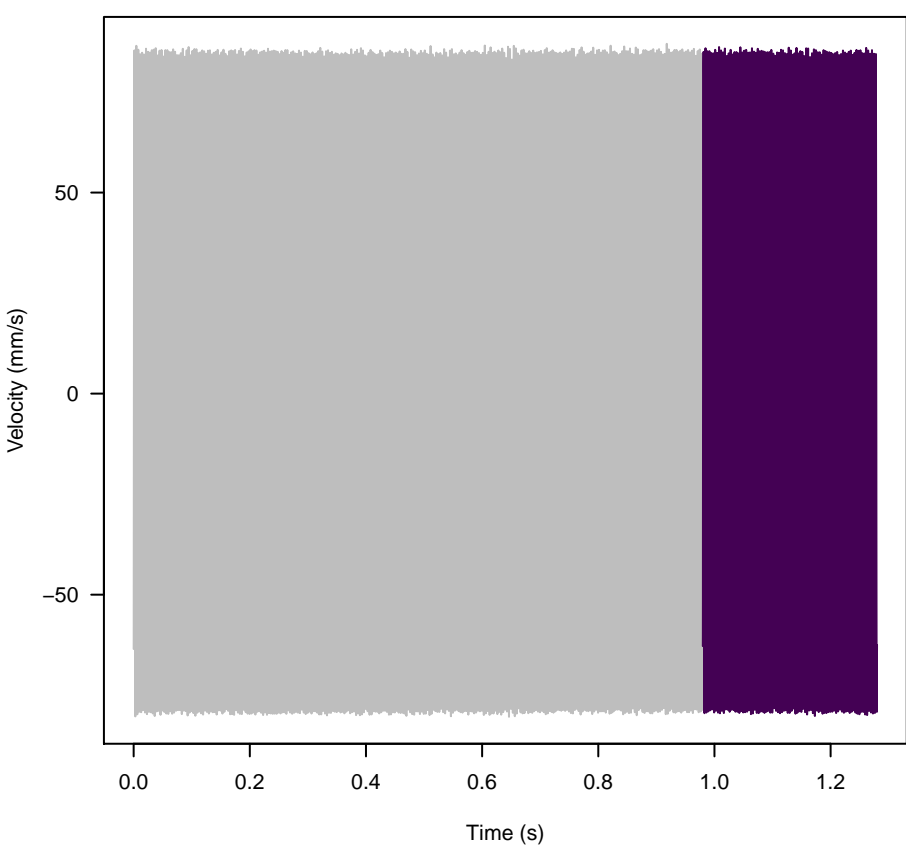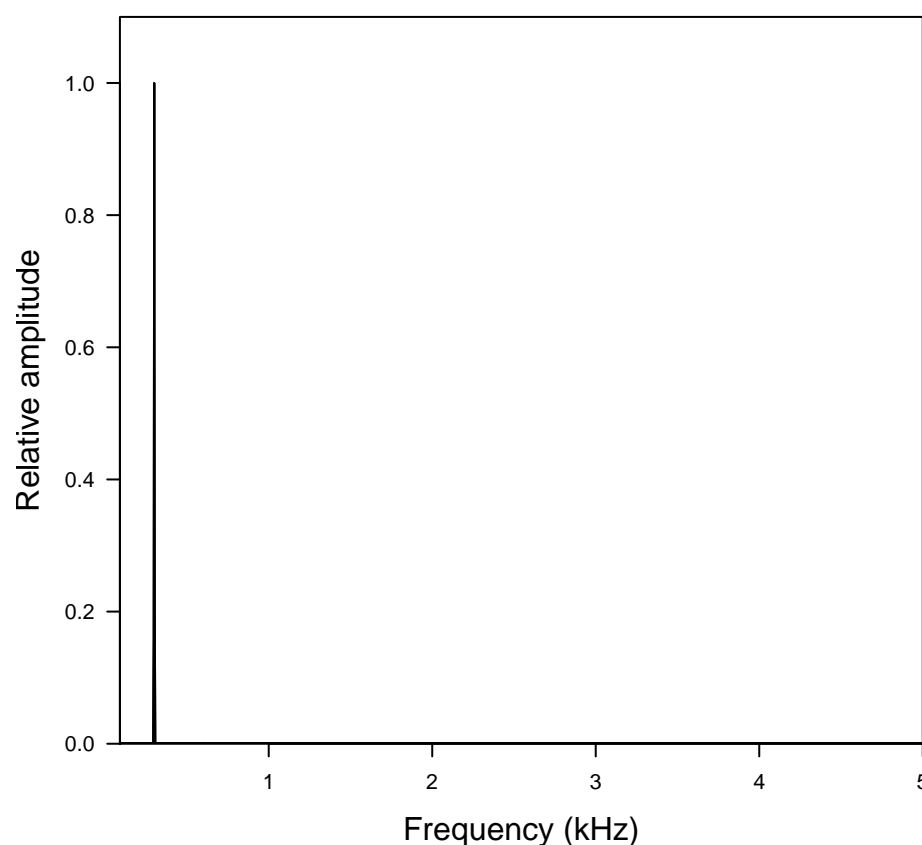

Vel. = 0.057 ; Str. = FA ; Axis = y ; Fl. accession = 10-s-81-1AB

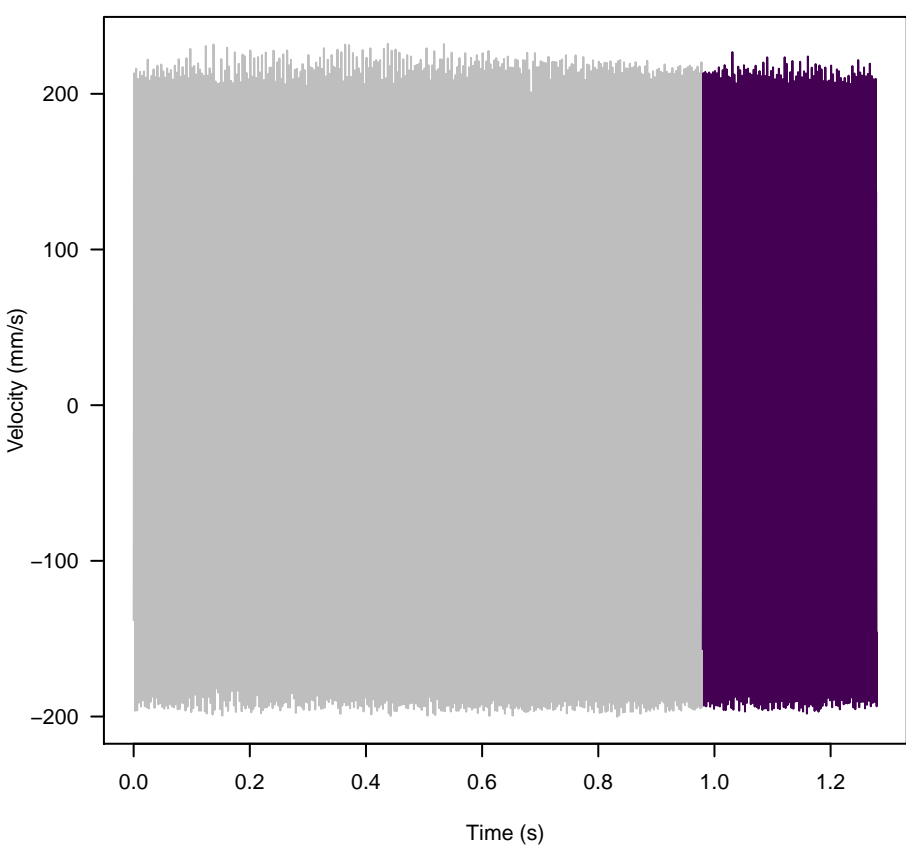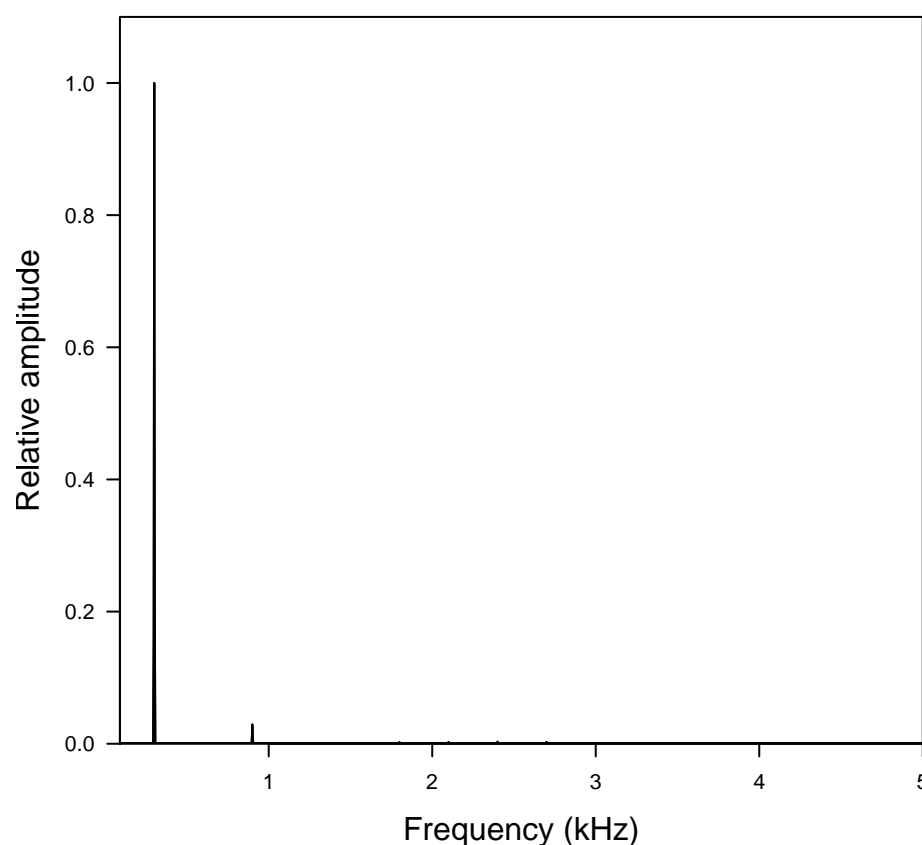

Vel. = 0.057 ; Str. = Receptacle ; Axis = y ; Fl. accession = 10-s-81-1AB

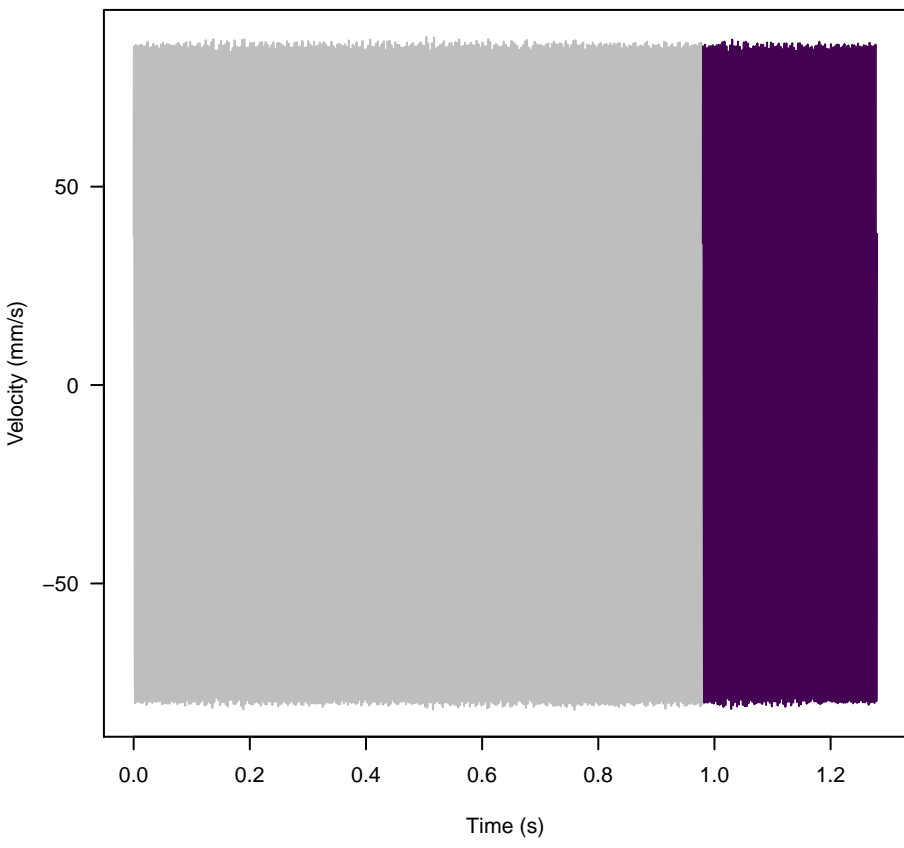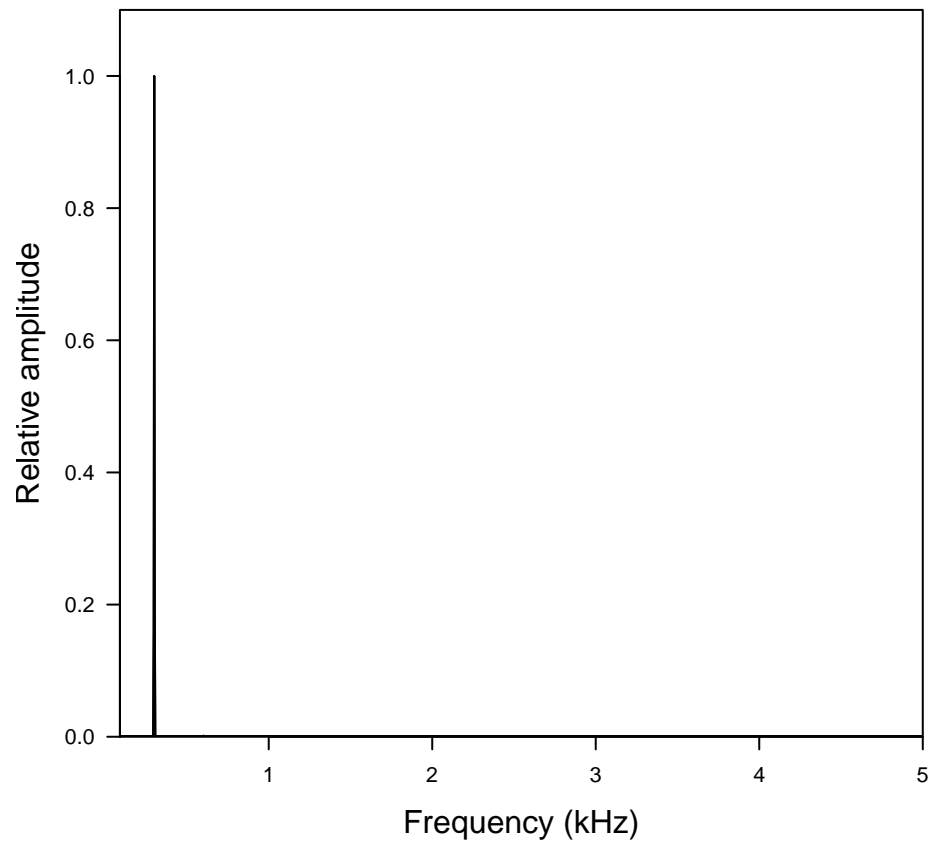

Vel. = 0.057 ; Str. = PA ; Axis = y ; Fl. accession = 10-s-81-1AB

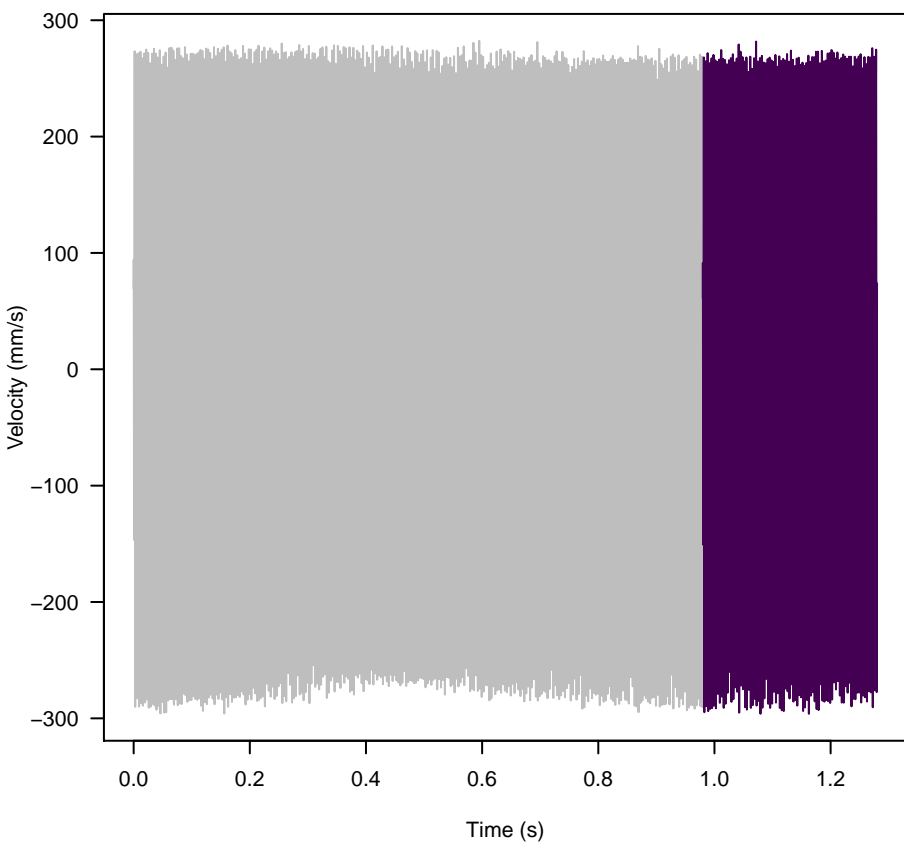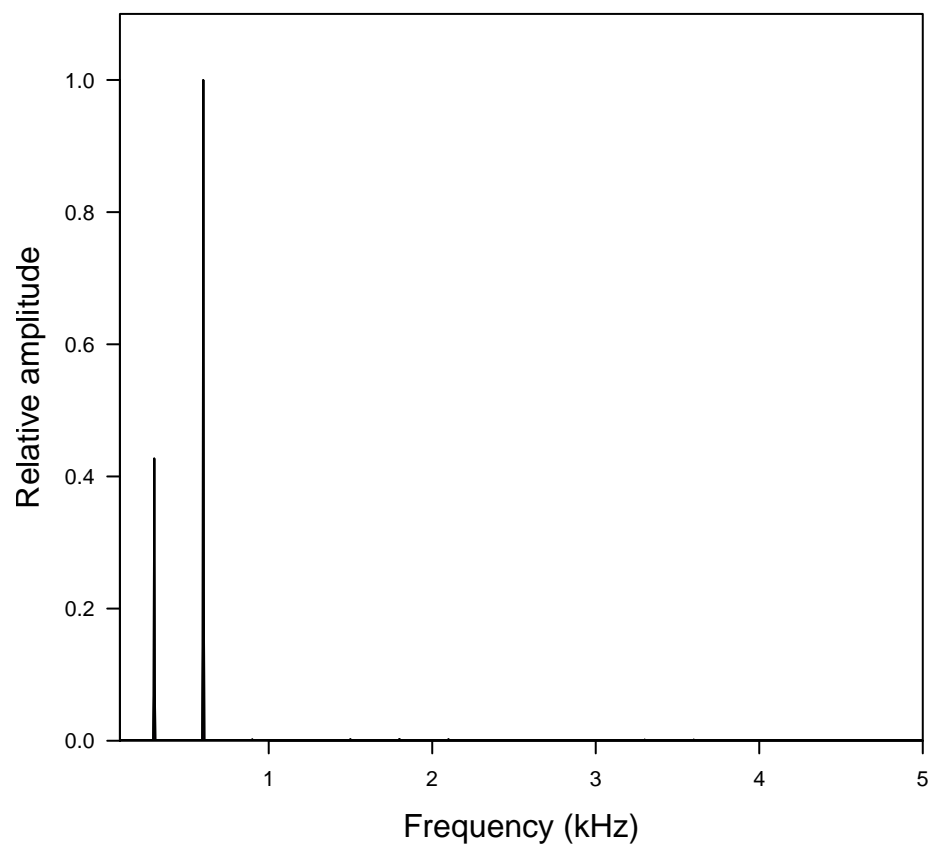

Vel. = 0.057 ; Str. = Receptacle ; Axis = y ; Fl. accession = 10-s-81-1AB

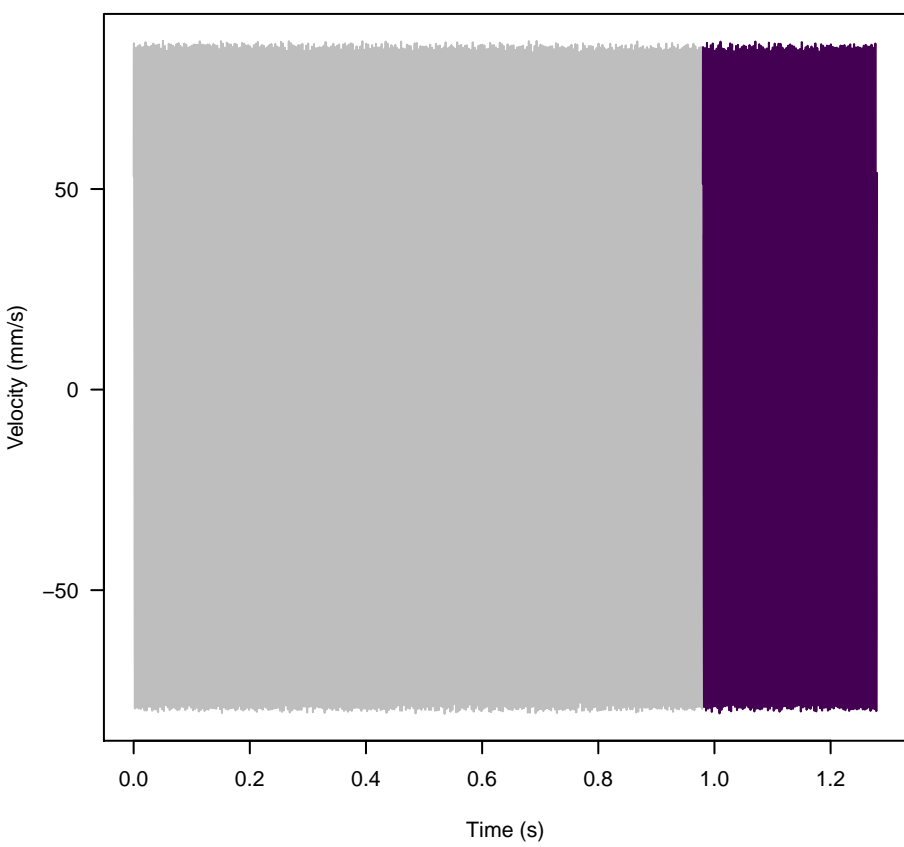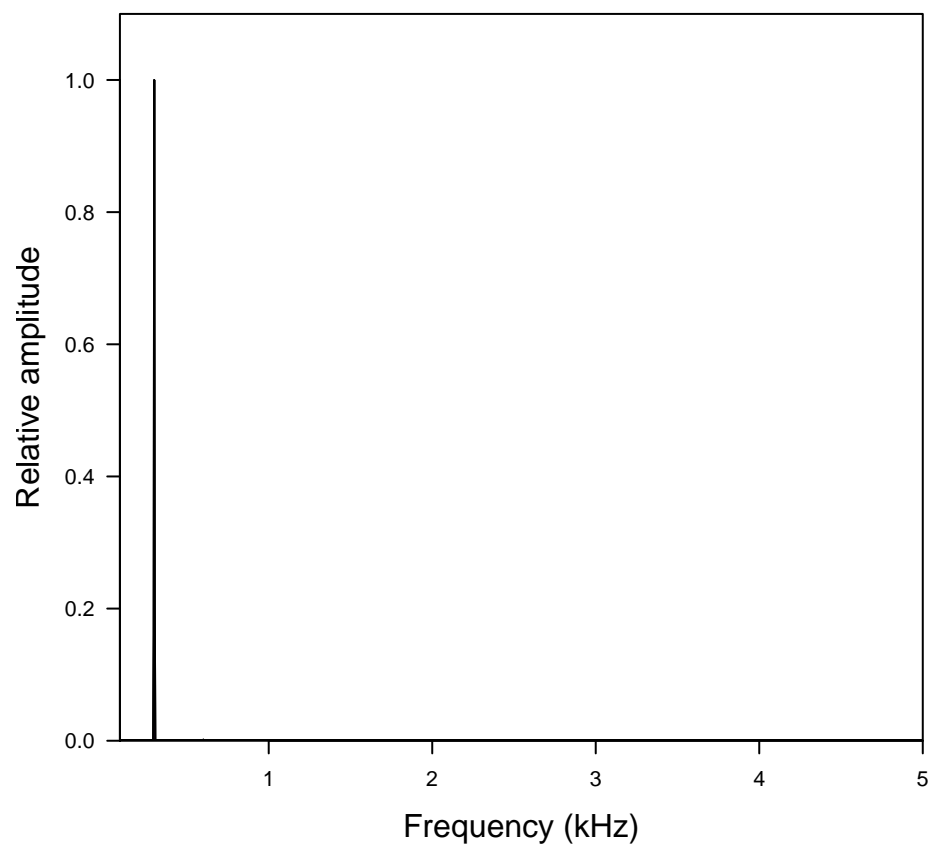

Vel. = 0.028 ; Str. = PA ; Axis = y ; Fl. accession = 10-s-81-1AB

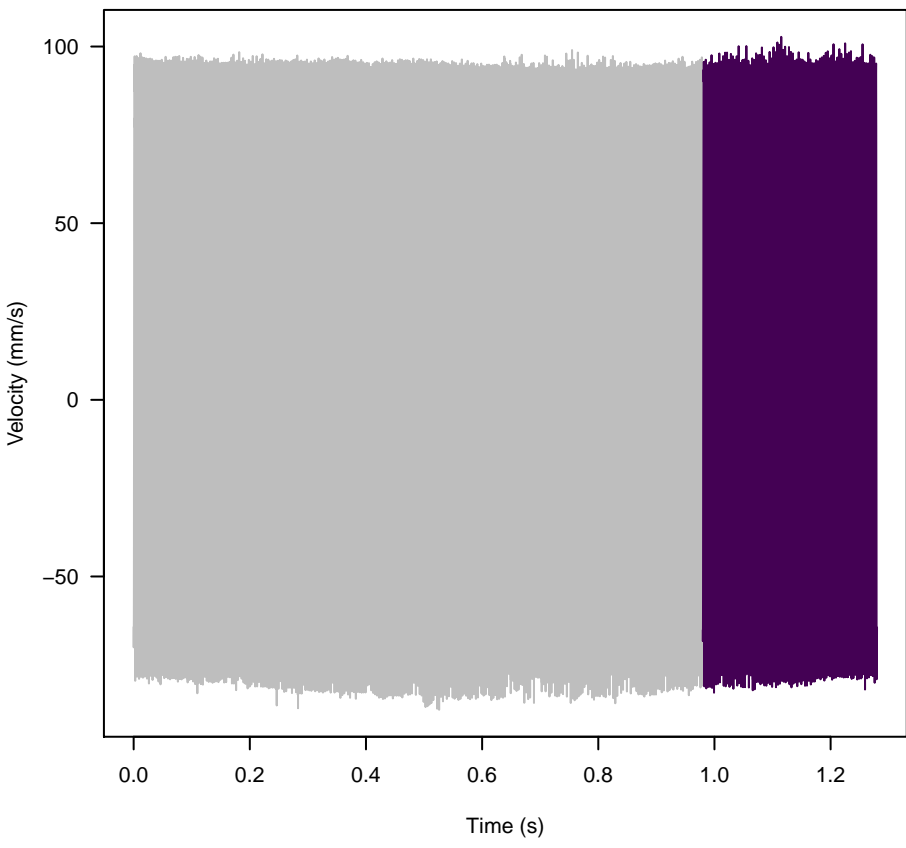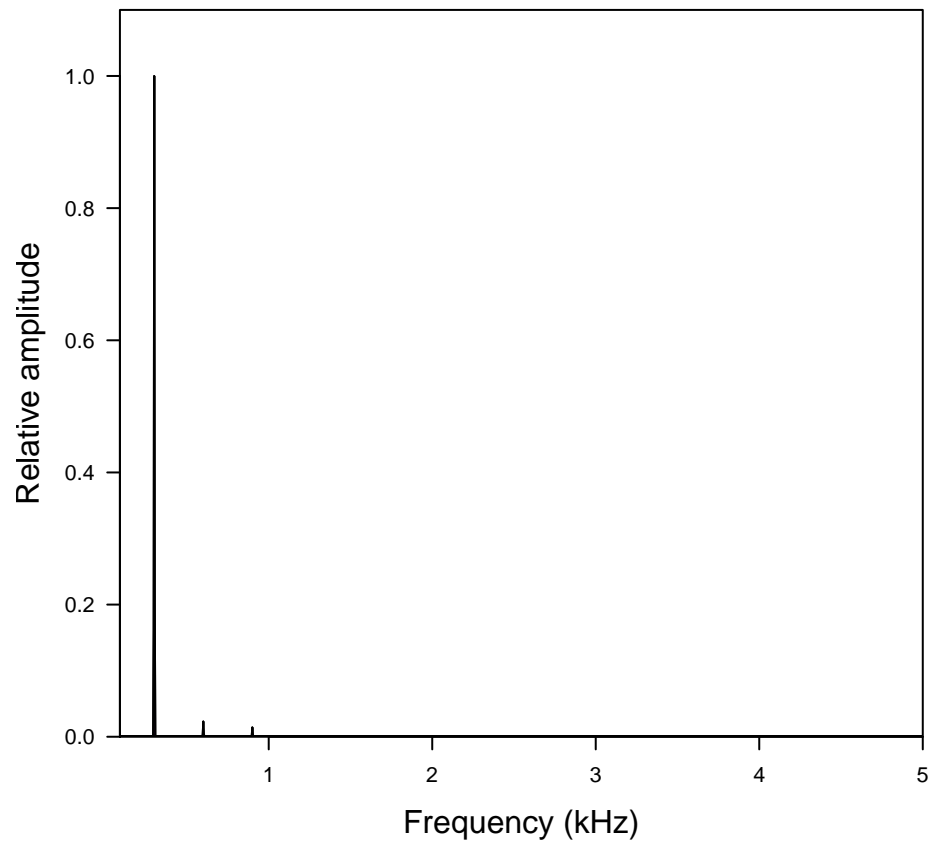

Vel. = 0.028 ; Str. = Receptacle ; Axis = y ; Fl. accession = 10-s-81-1AB

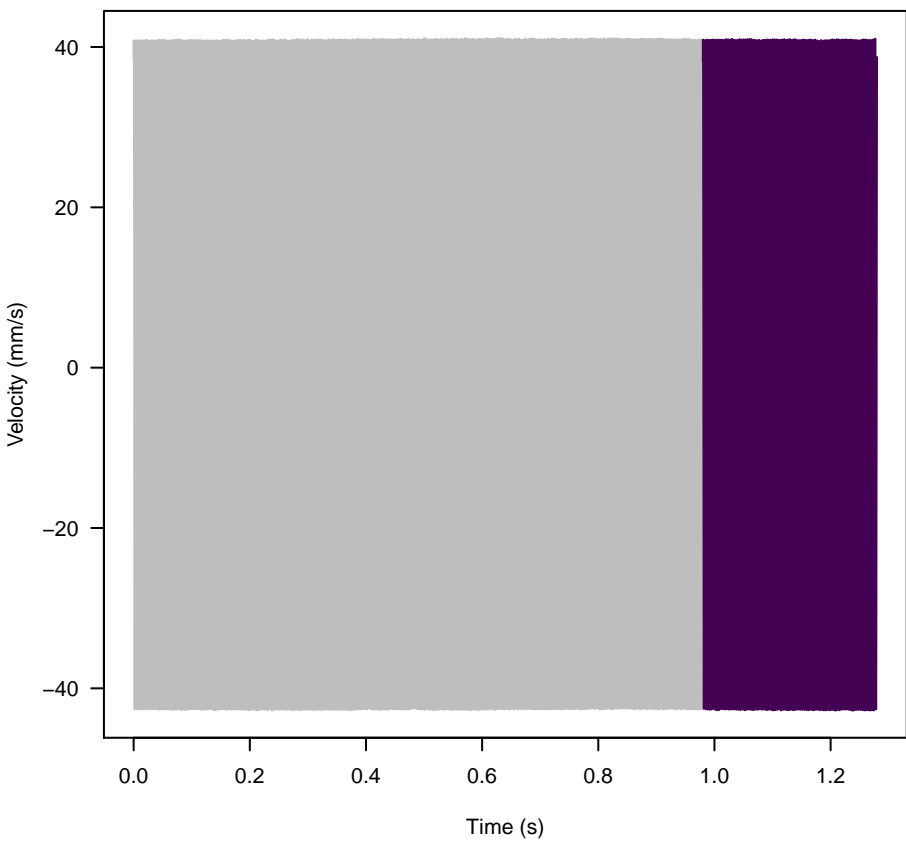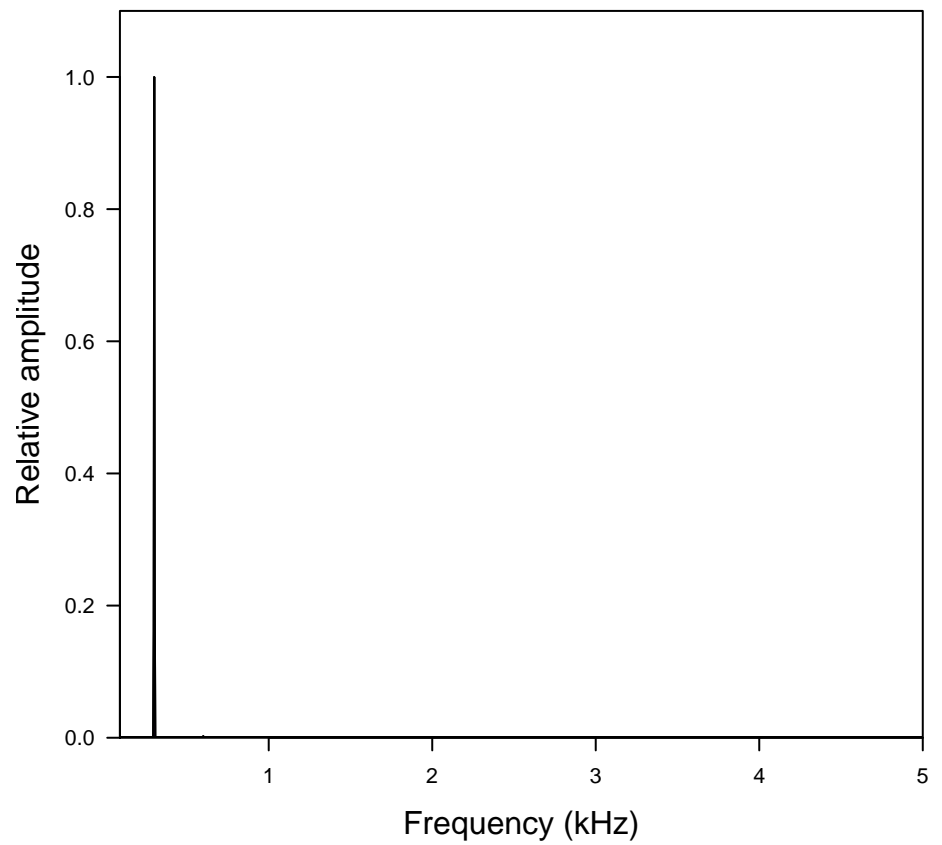

Vel. = 0.028 ; Str. = FA ; Axis = y ; Fl. accession = 10-s-81-1AB

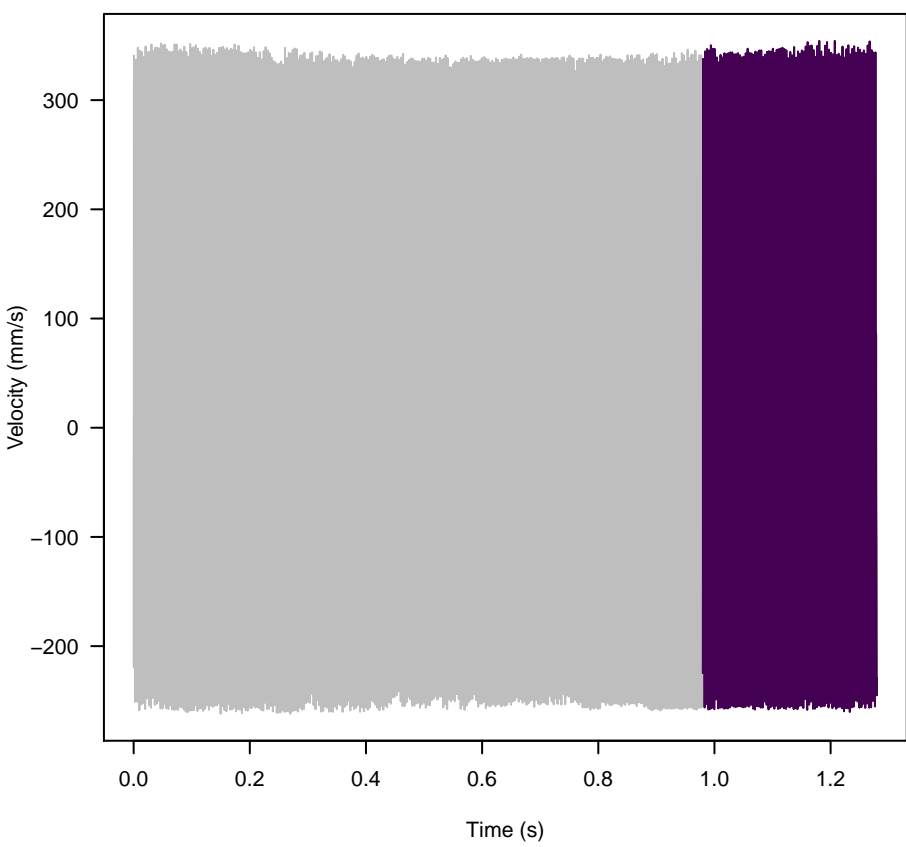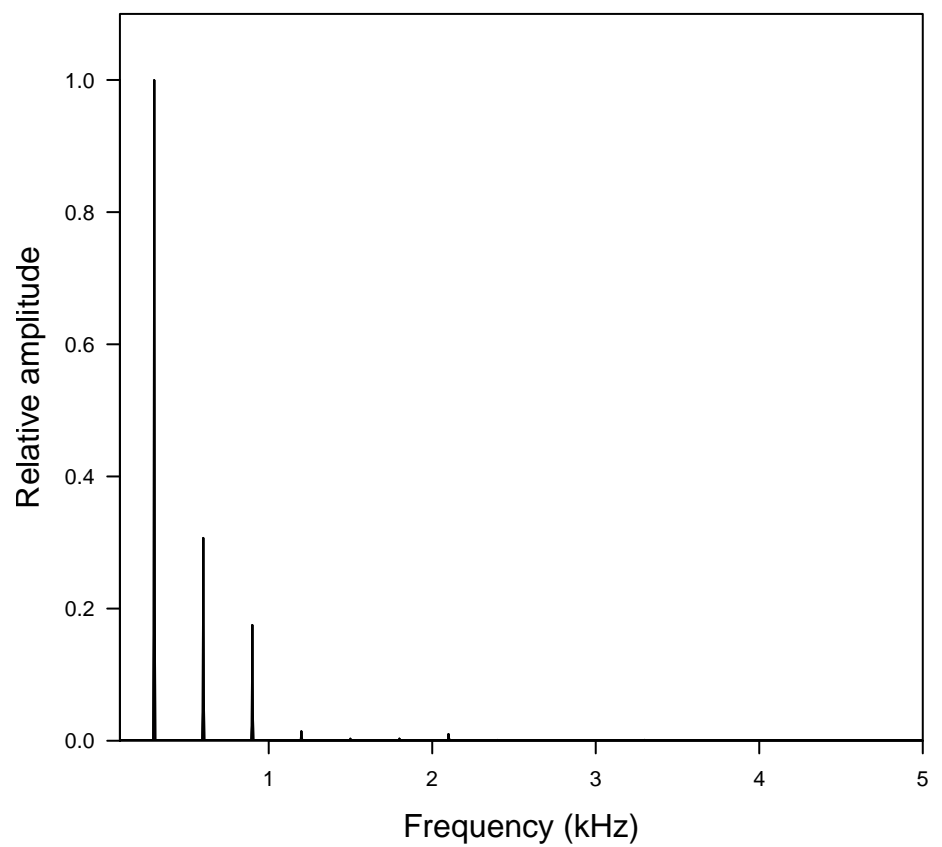

Vel. = 0.028 ; Str. = Receptacle ; Axis = y ; Fl. accession = 10-s-81-1AB

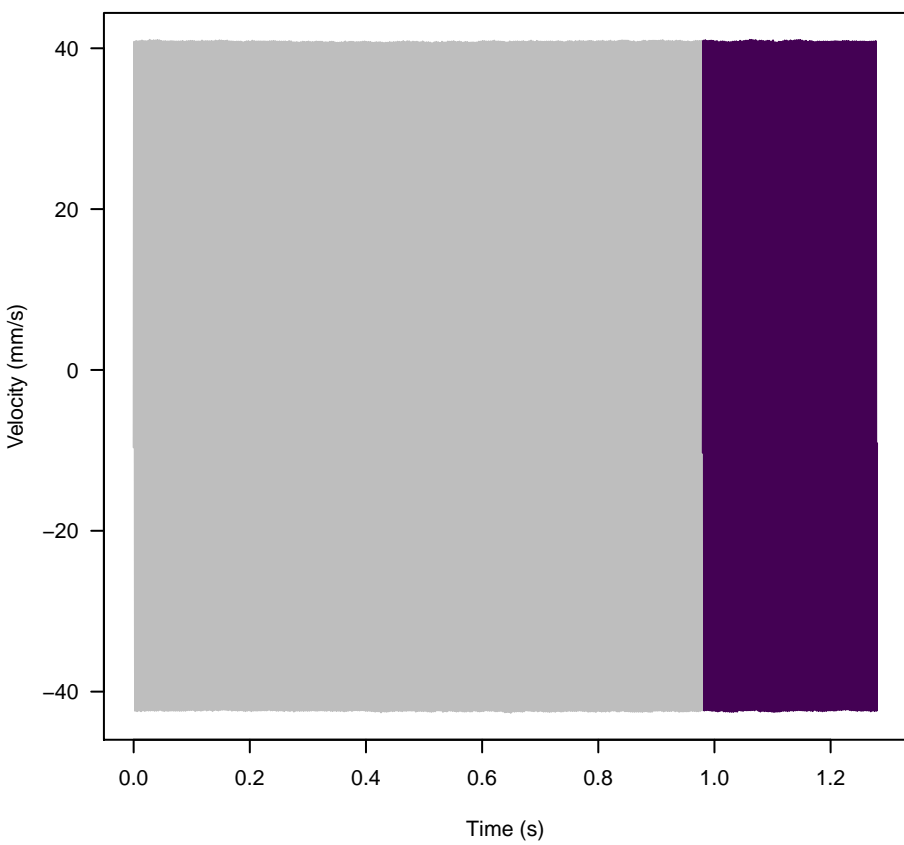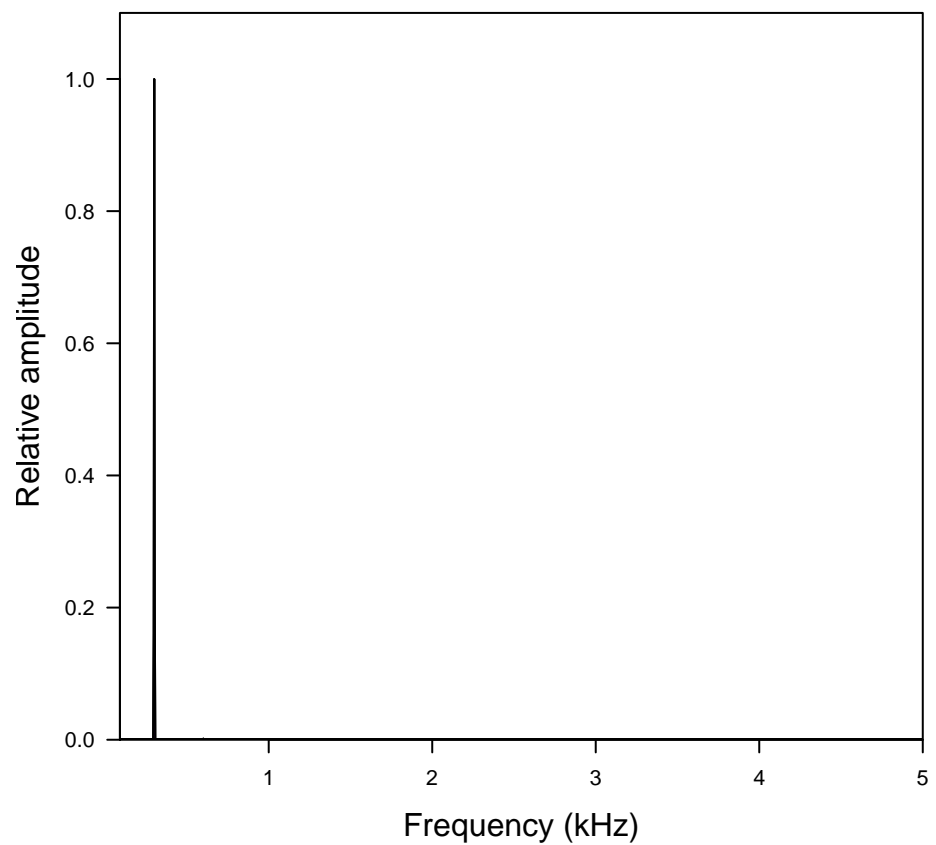

Vel. = 0.028 ; Str. = Corolla ; Axis = y ; Fl. accession = 10-s-81-1AB

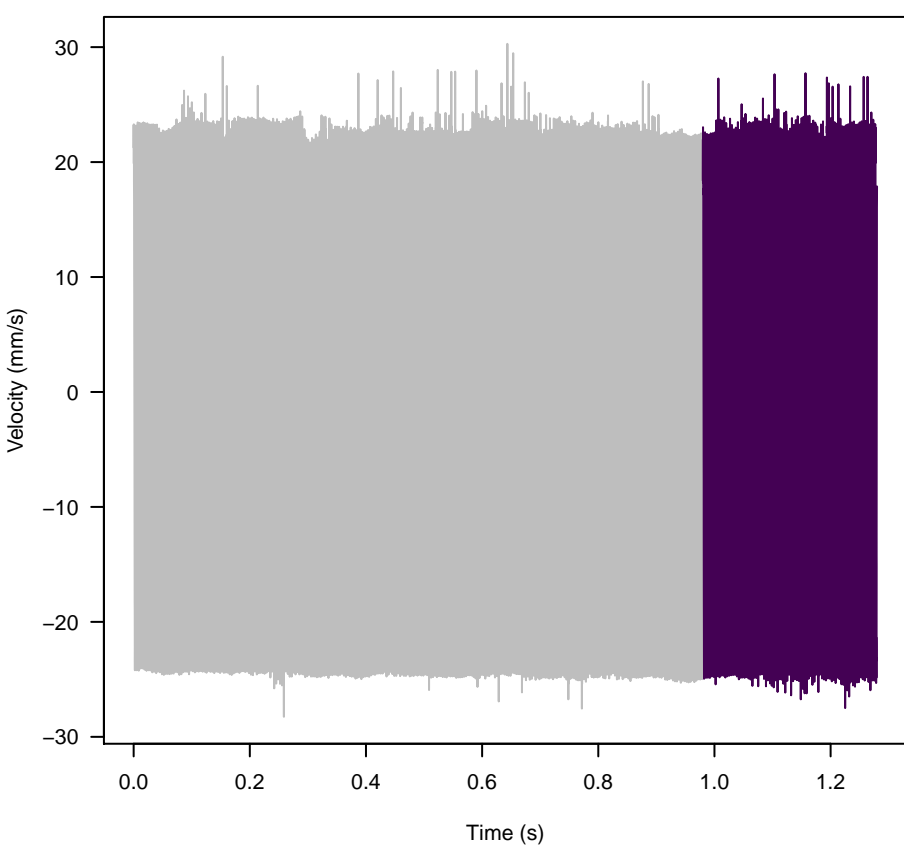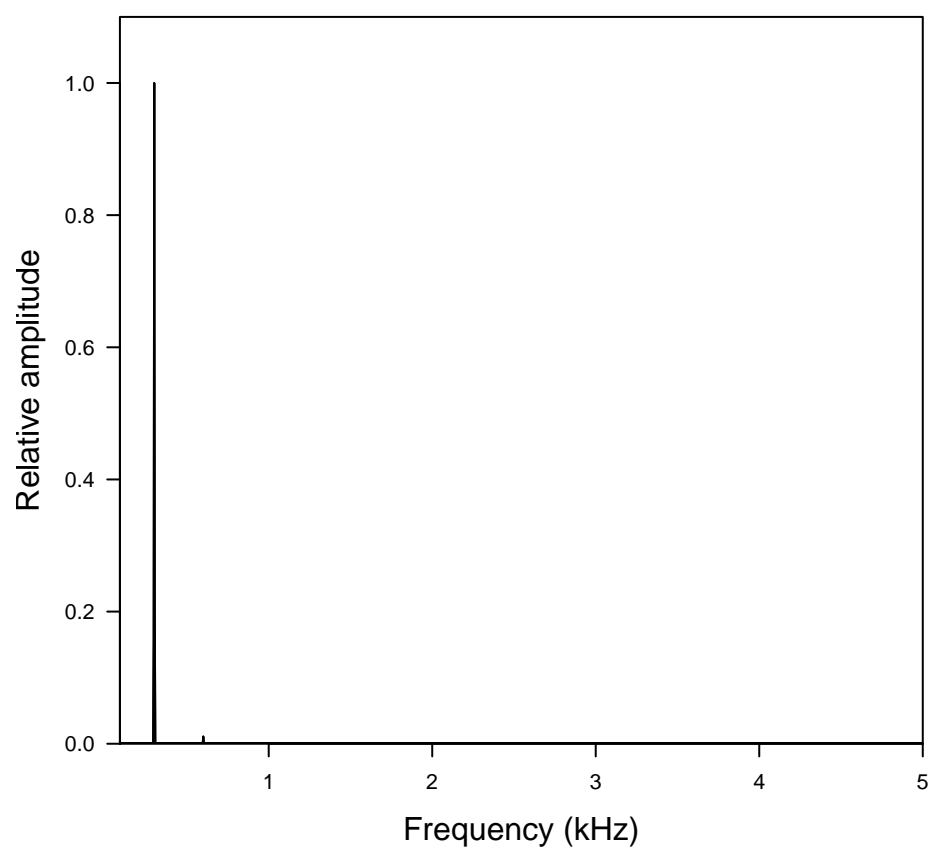

Vel. = 0.028 ; Str. = Receptacle ; Axis = y ; Fl. accession = 10-s-81-1AB

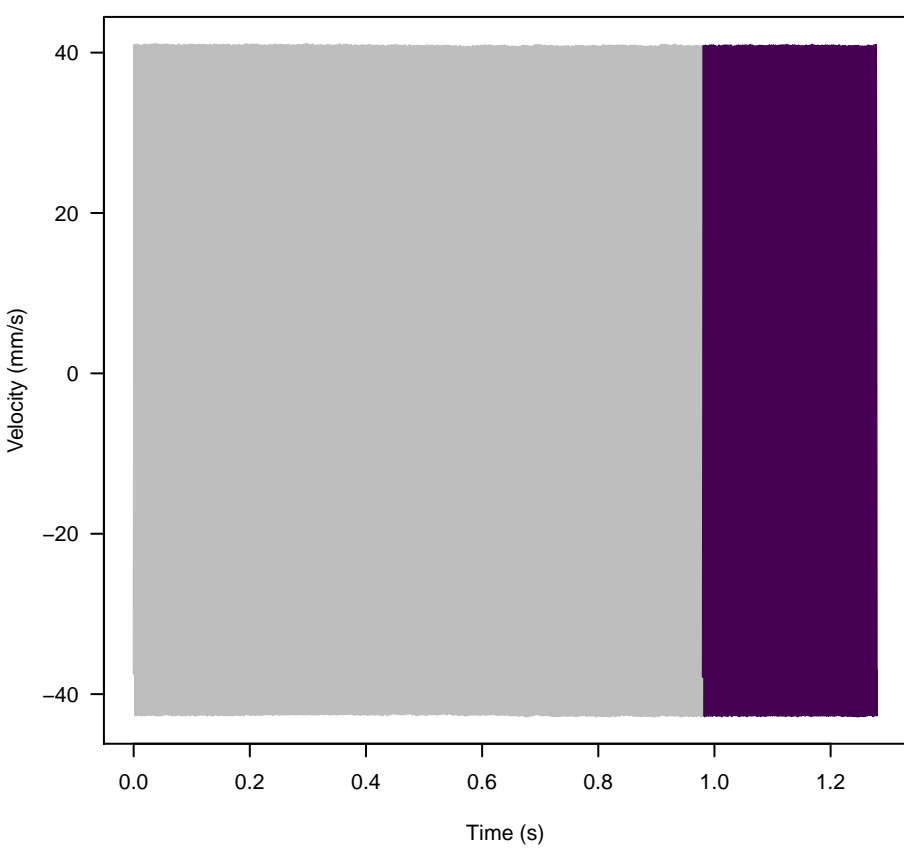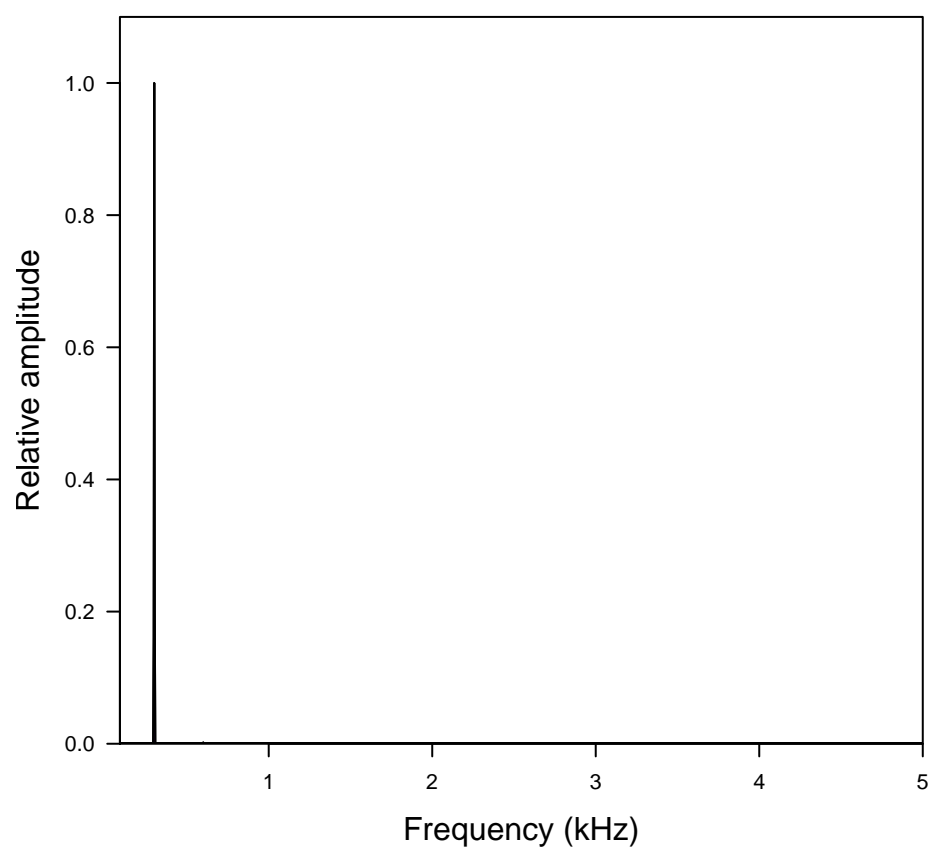

Vel. = 0.014 ; Str. = Corolla ; Axis = y ; Fl. accession = 10-s-81-1AB

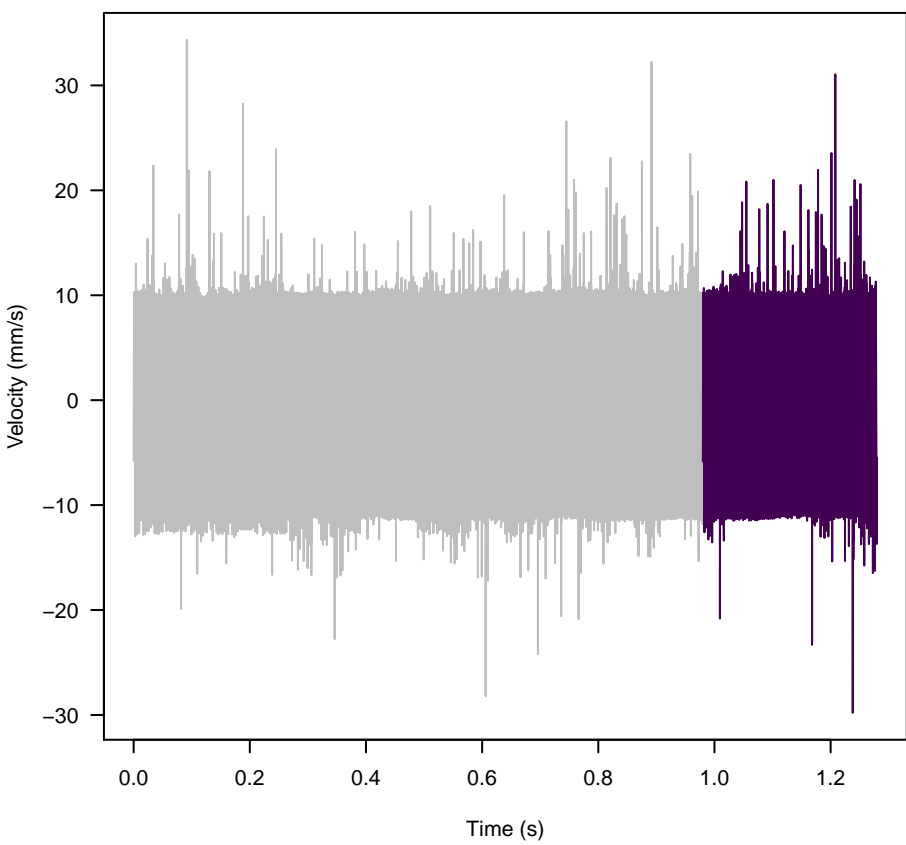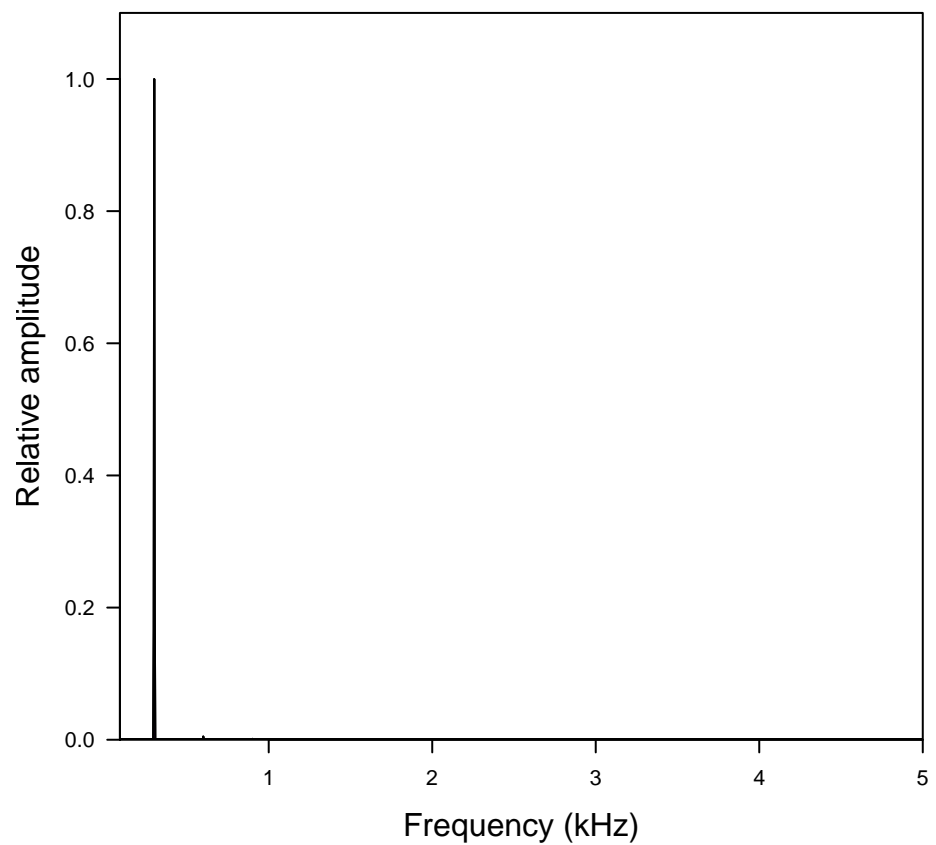

Vel. = 0.014 ; Str. = Receptacle ; Axis = y ; Fl. accession = 10-s-81-1AB

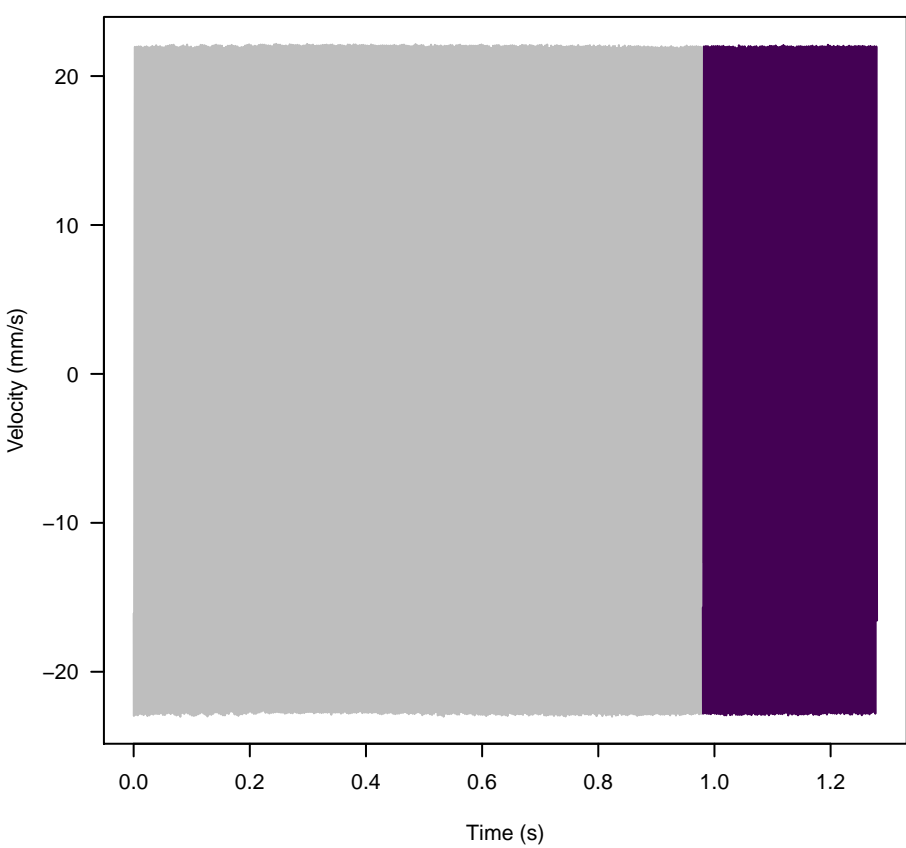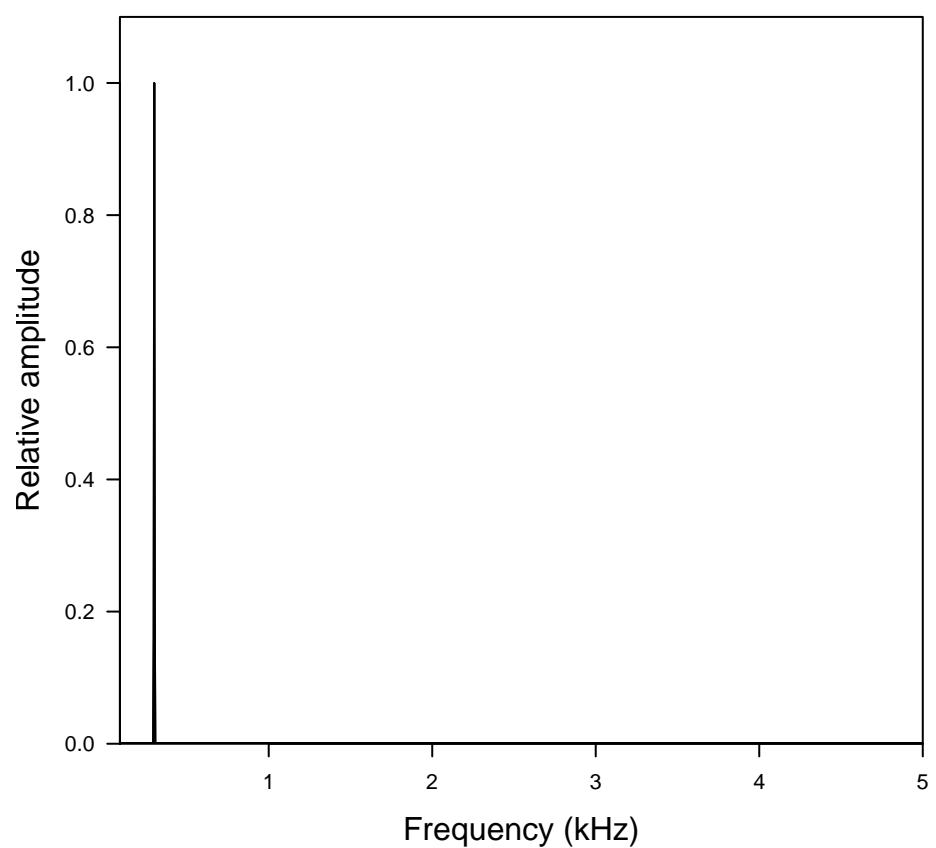

Vel. = 0.014 ; Str. = FA ; Axis = y ; Fl. accession = 10-s-81-1AB

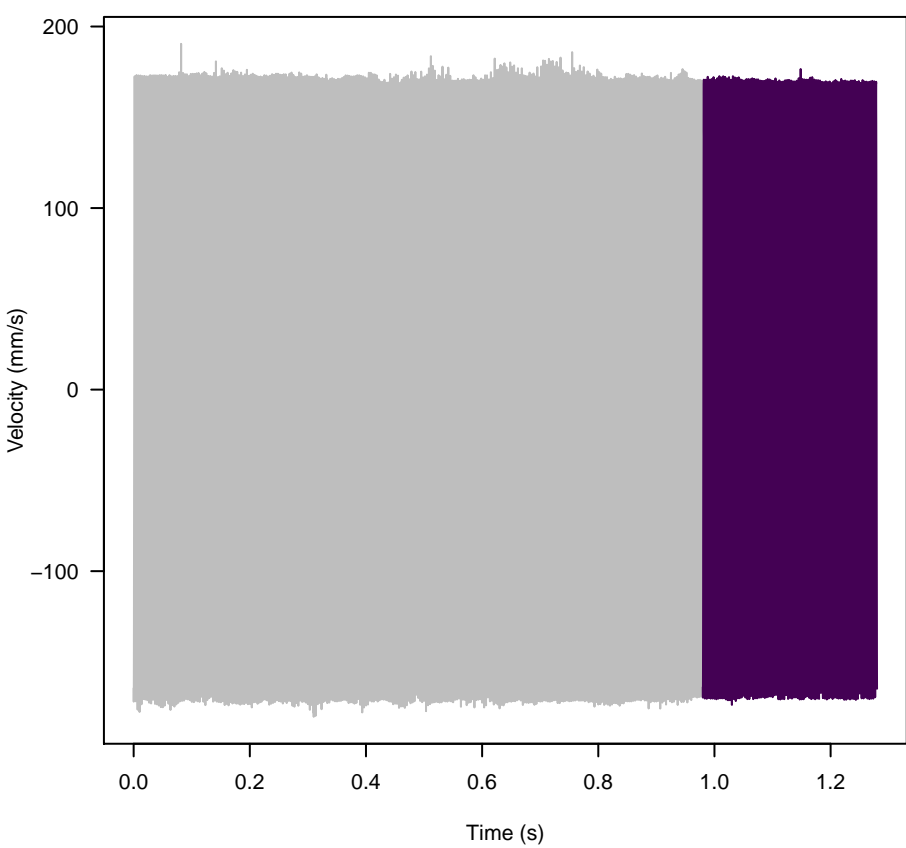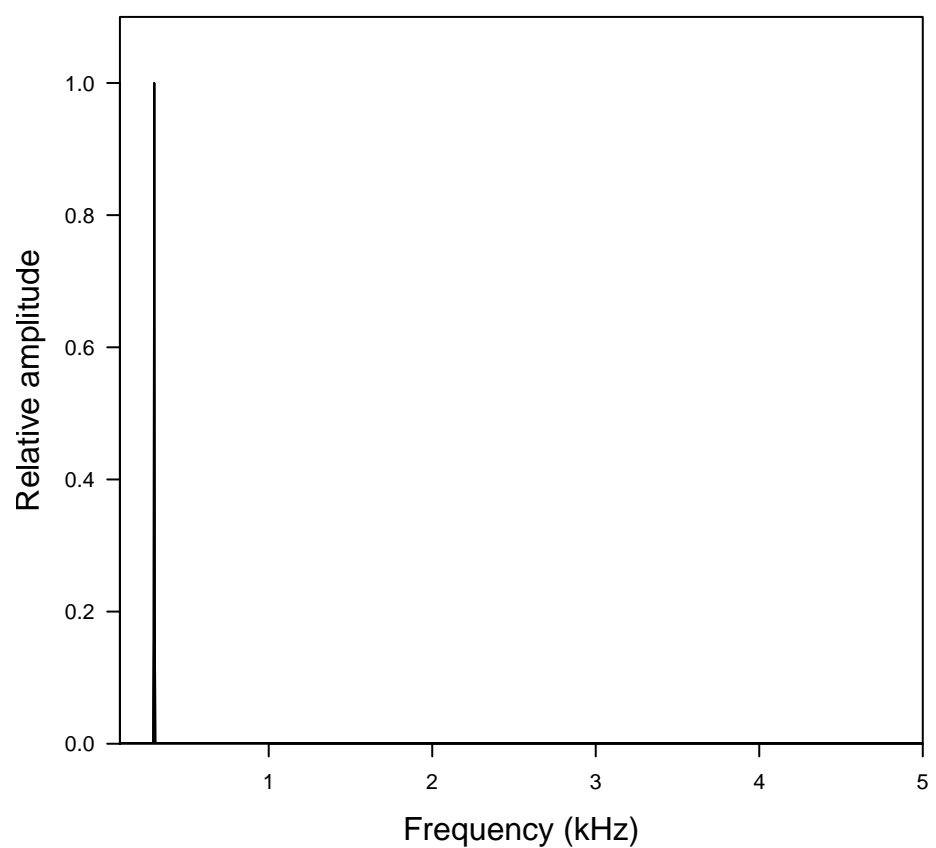

Vel. = 0.014 ; Str. = Receptacle ; Axis = y ; Fl. accession = 10-s-81-1AB

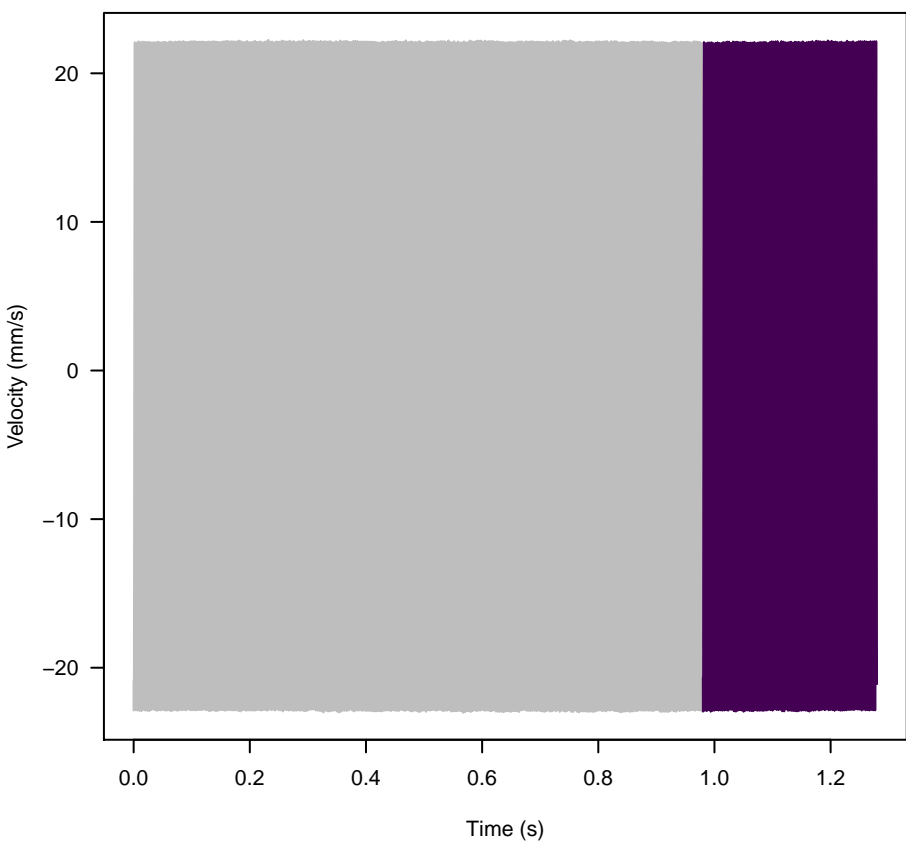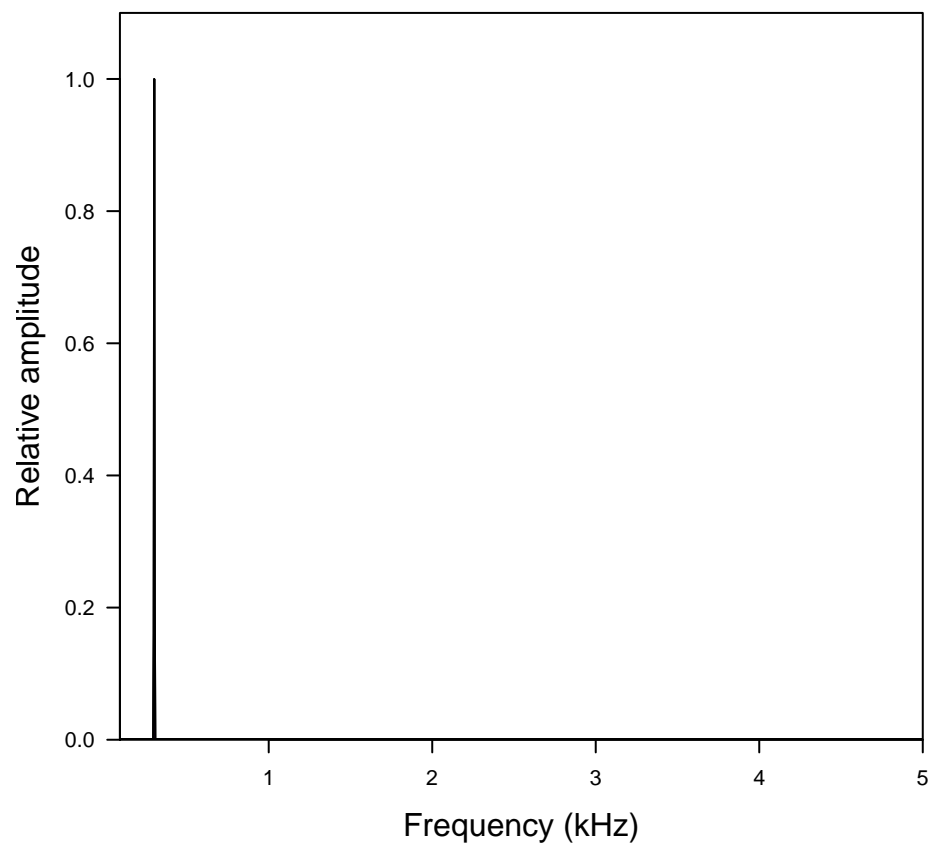

Vel. = 0.014 ; Str. = PA ; Axis = y ; Fl. accession = 10-s-81-1AB

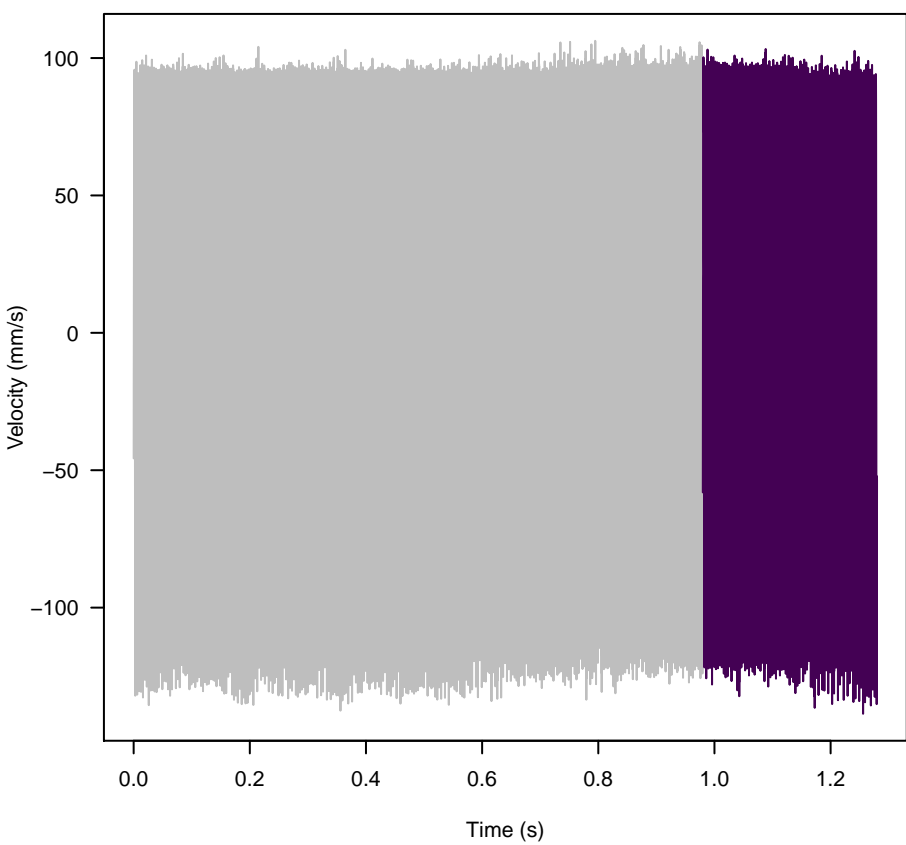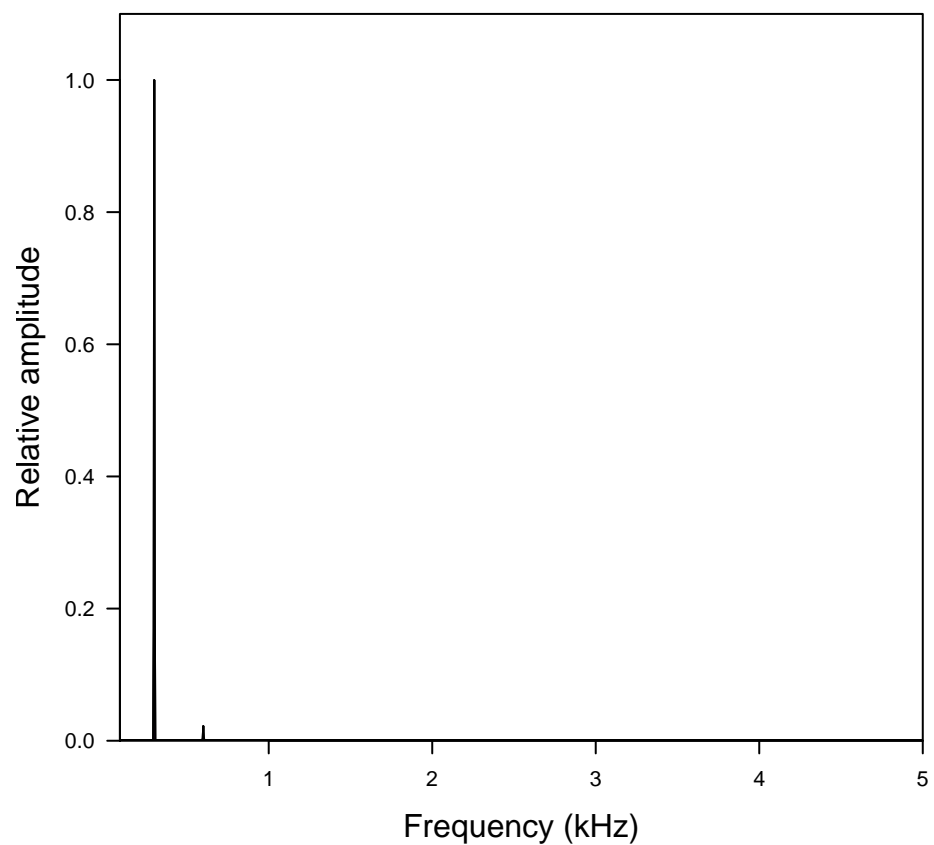

Vel. = 0.014 ; Str. = Receptacle ; Axis = y ; Fl. accession = 10-s-81-1AB

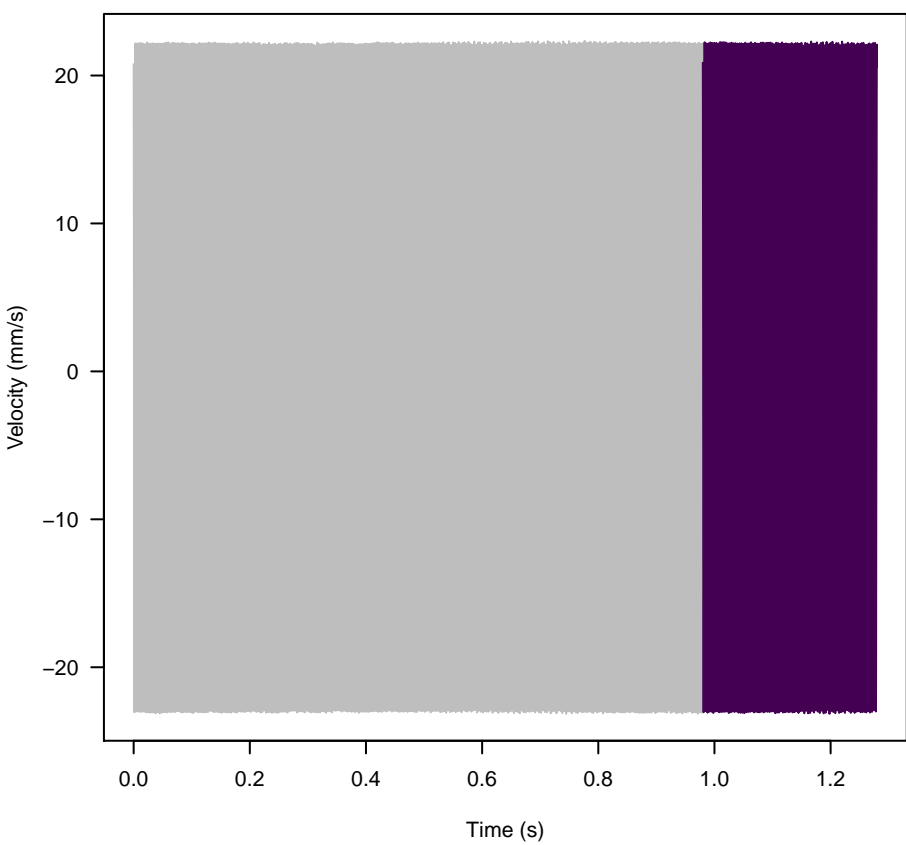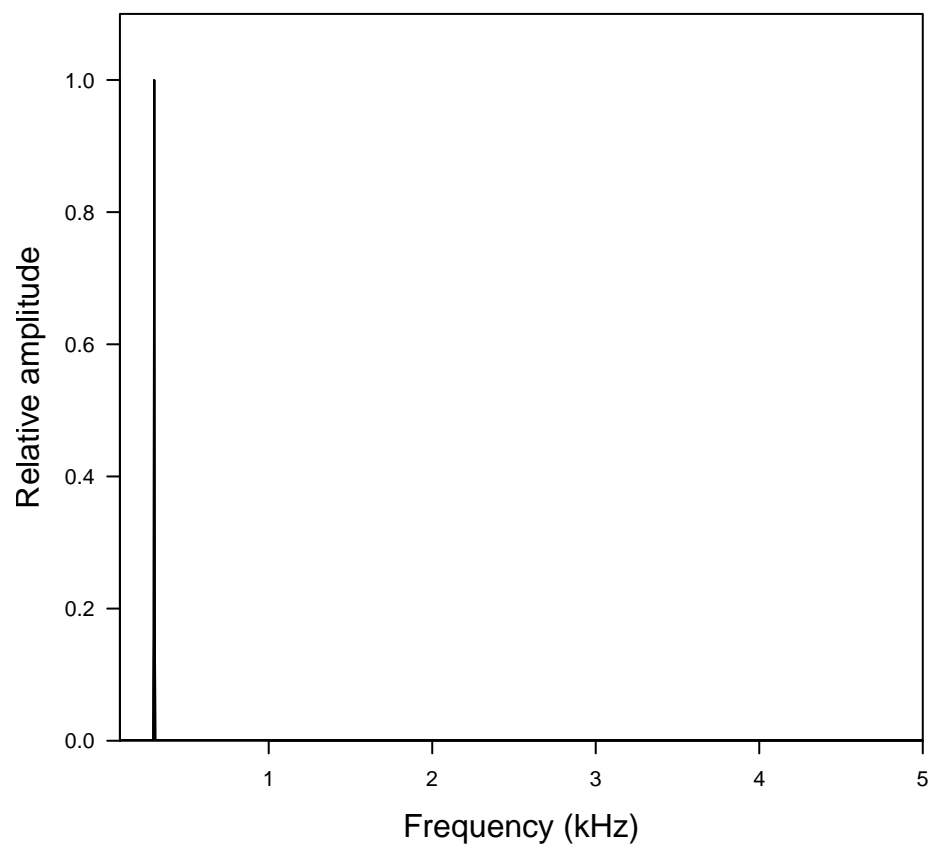



Vel. = 0.014 ; Str. = Corolla ; Axis = z ; Fl. accession = 10-s-81-1AB

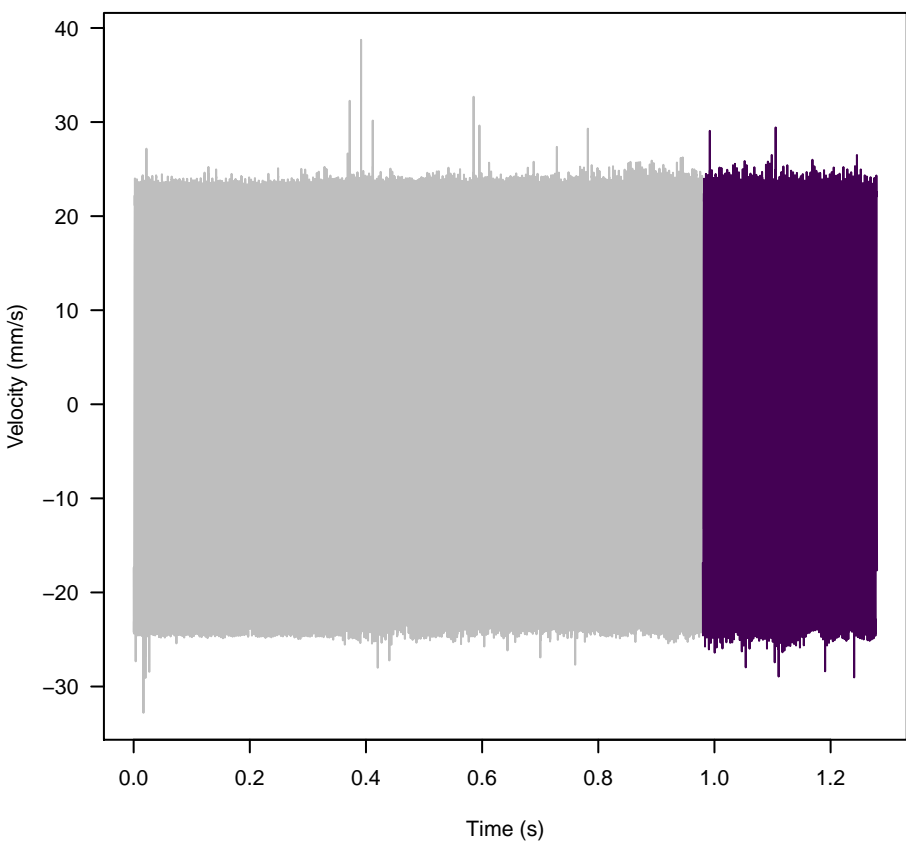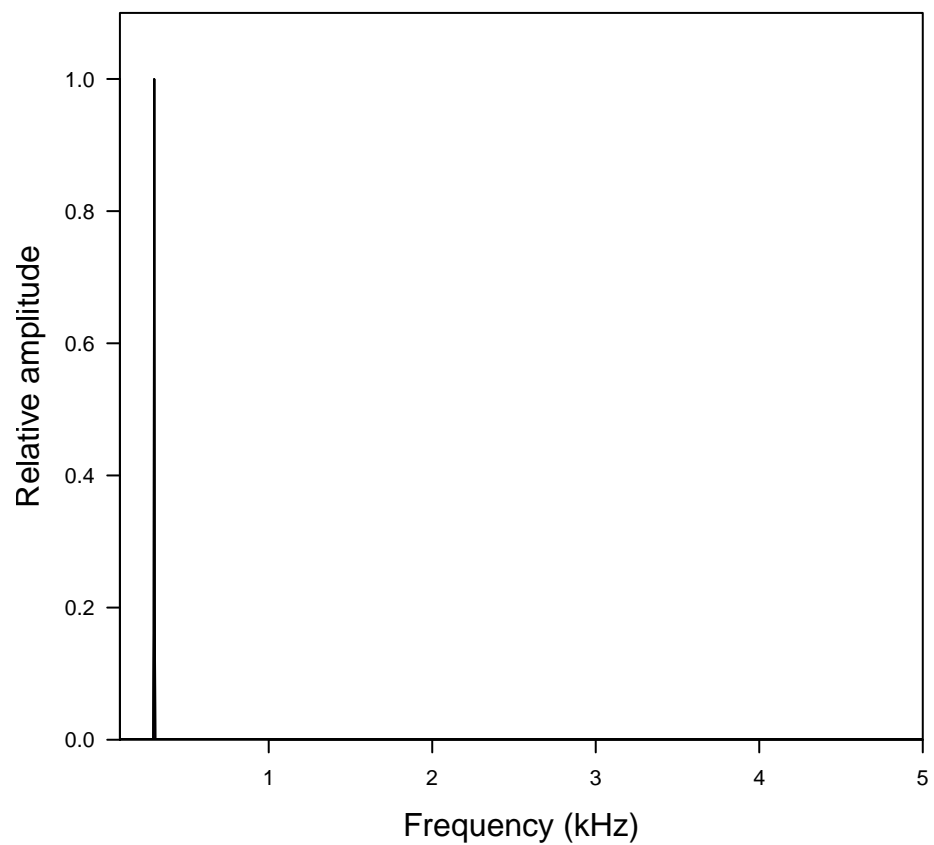

Vel. = 0.014 ; Str. = Receptacle ; Axis = z ; Fl. accession = 10-s-81-1AB

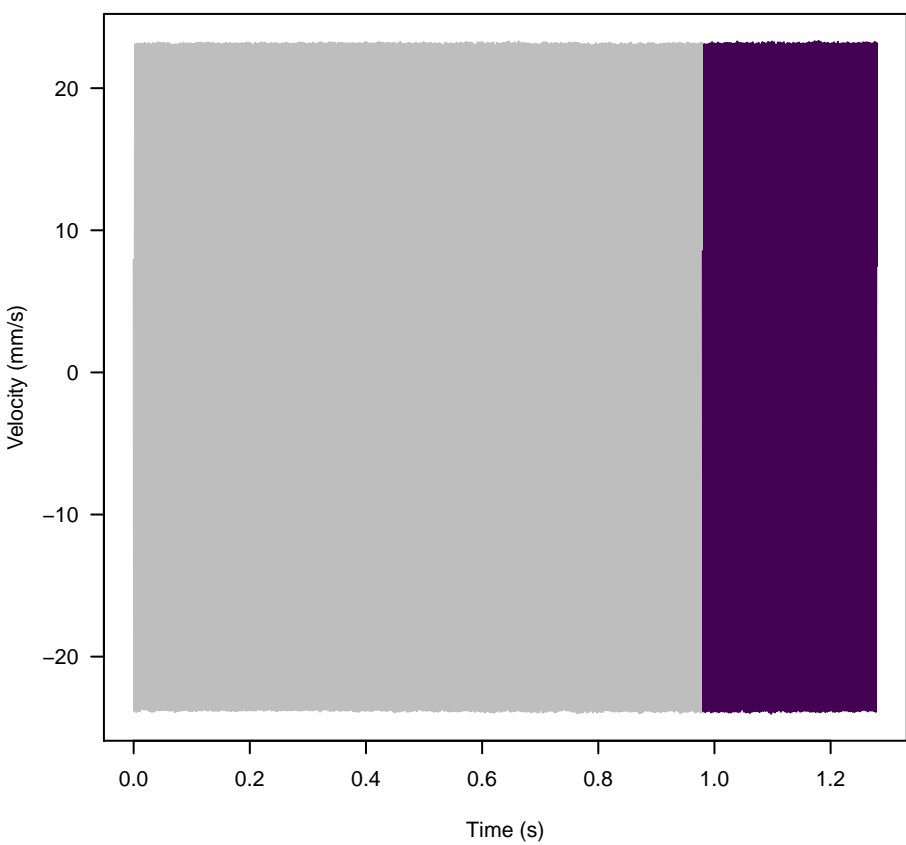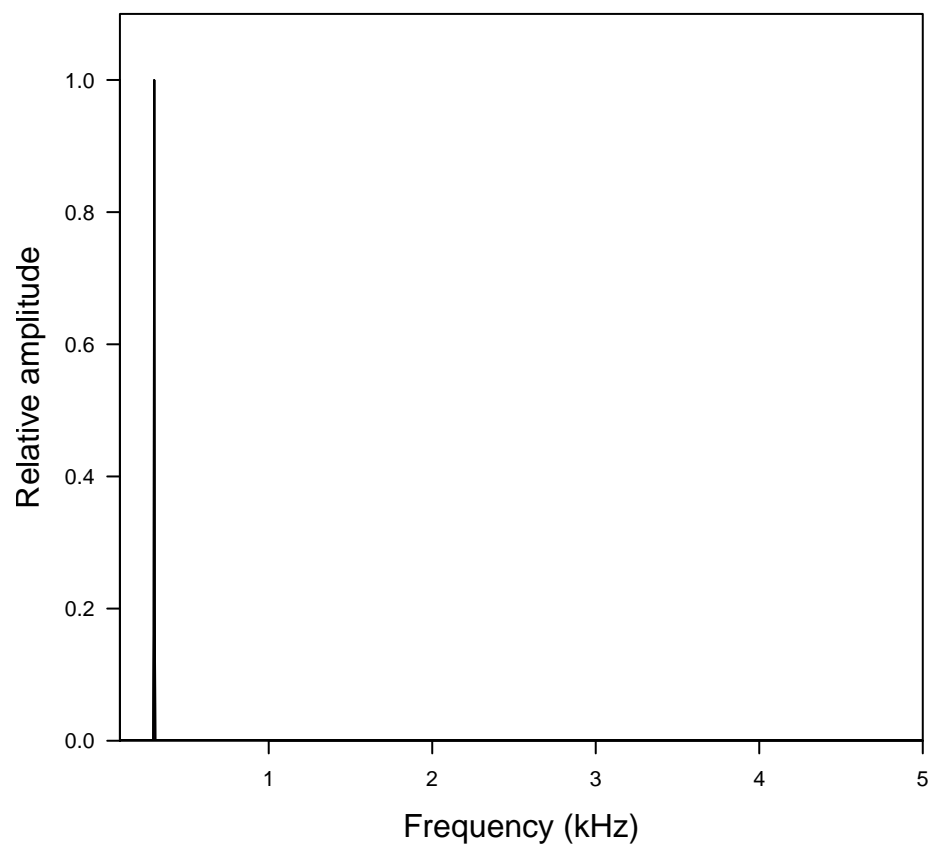

Vel. = 0.014 ; Str. = FA ; Axis = z ; Fl. accession = 10-s-81-1AB

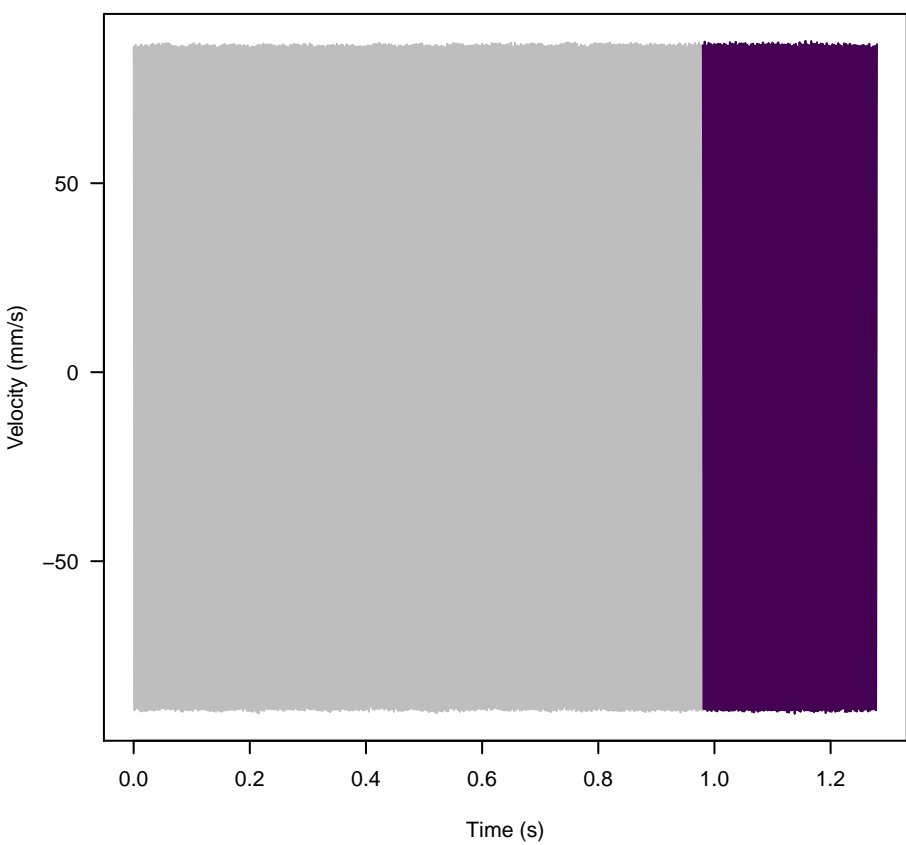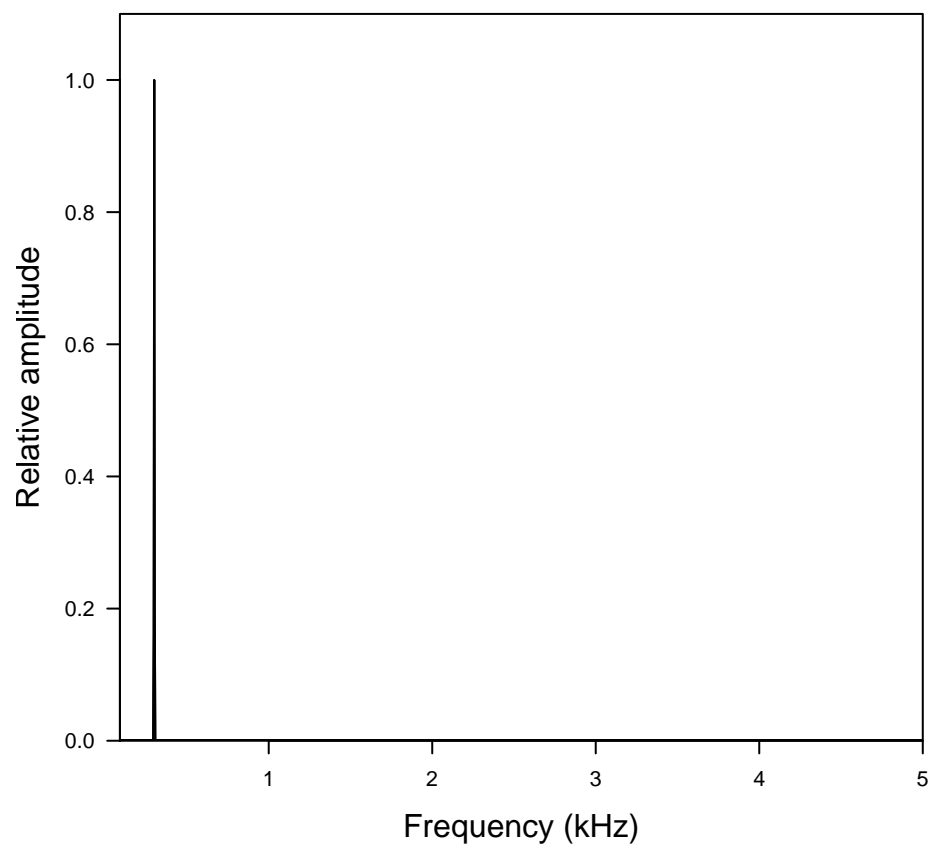

Vel. = 0.014 ; Str. = Receptacle ; Axis = z ; Fl. accession = 10-s-81-1AB

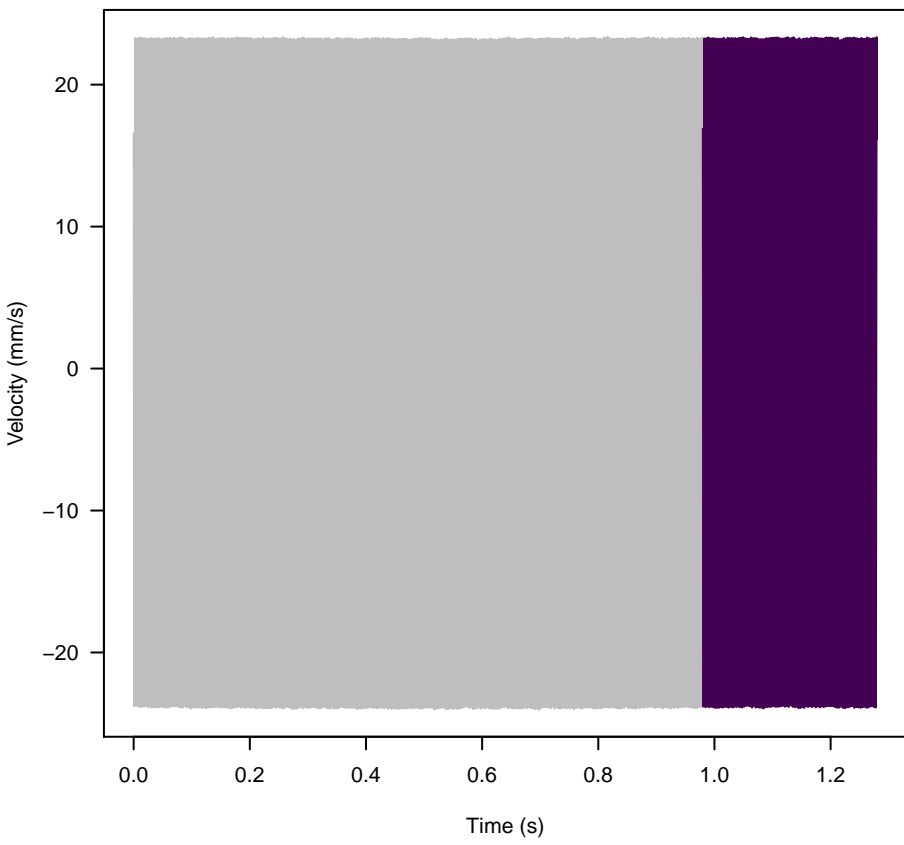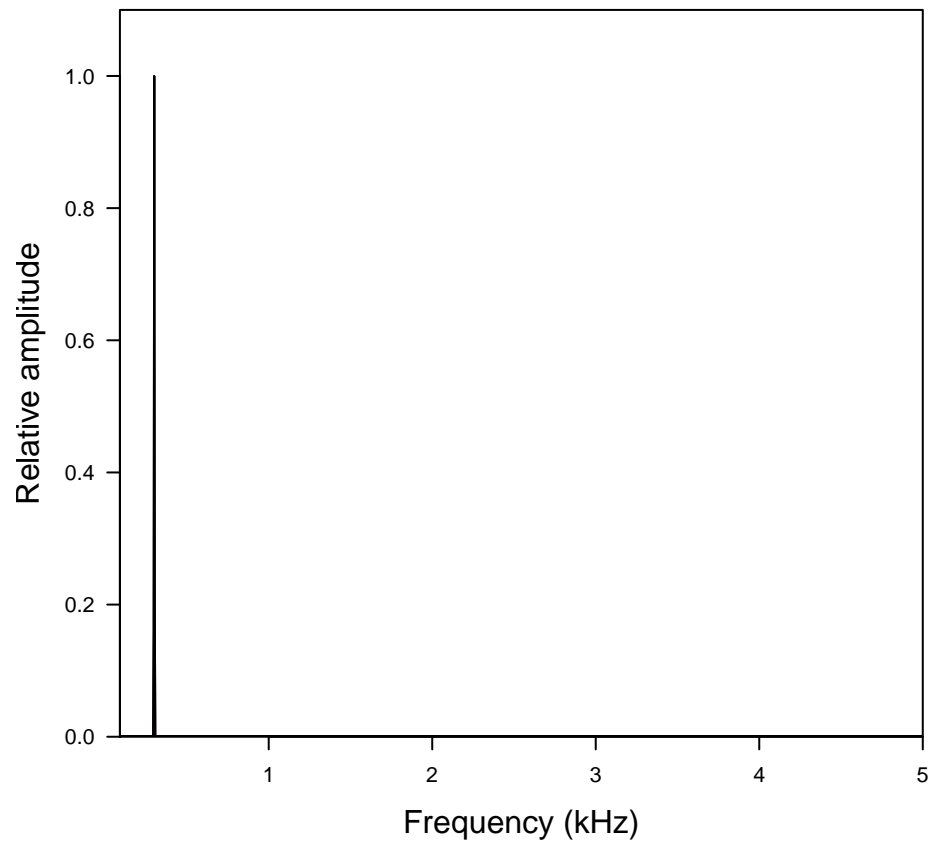

Vel. = 0.014 ; Str. = PA ; Axis = z ; Fl. accession = 10-s-81-1AB

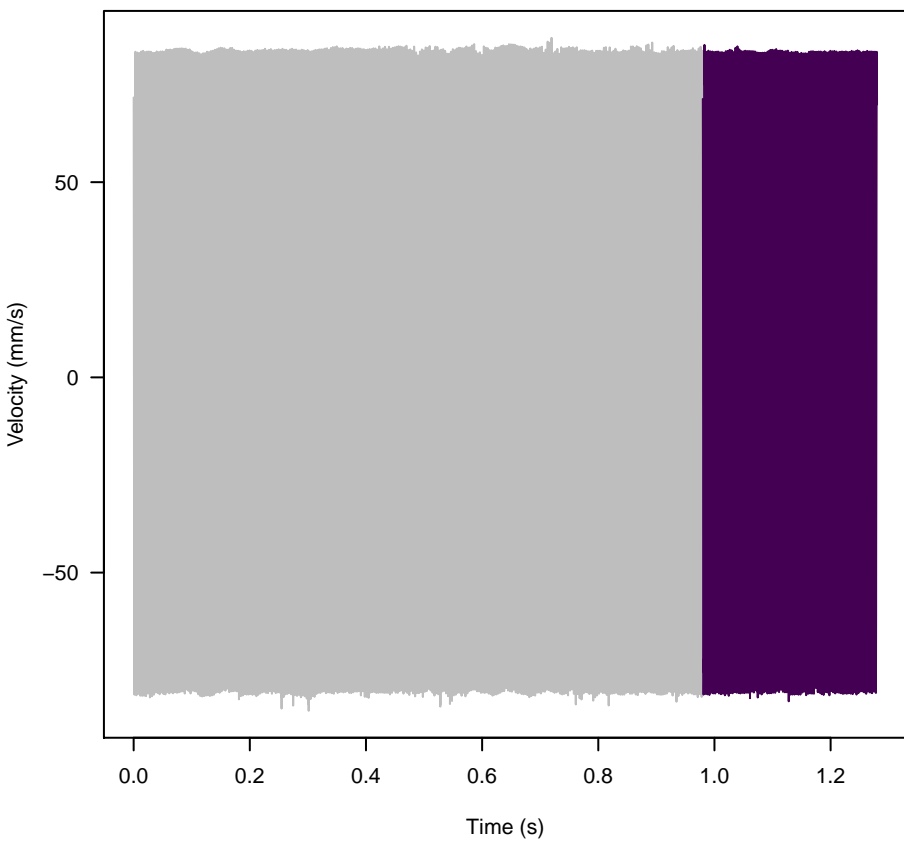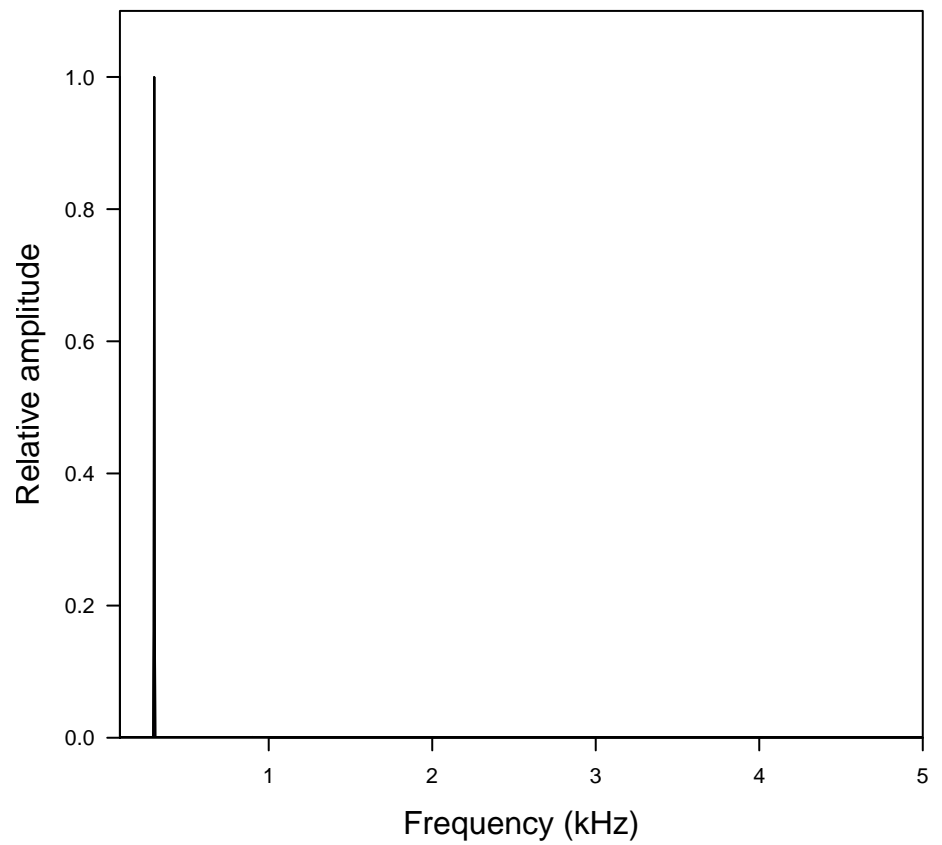

Vel. = 0.014 ; Str. = Receptacle ; Axis = z ; Fl. accession = 10-s-81-1AB

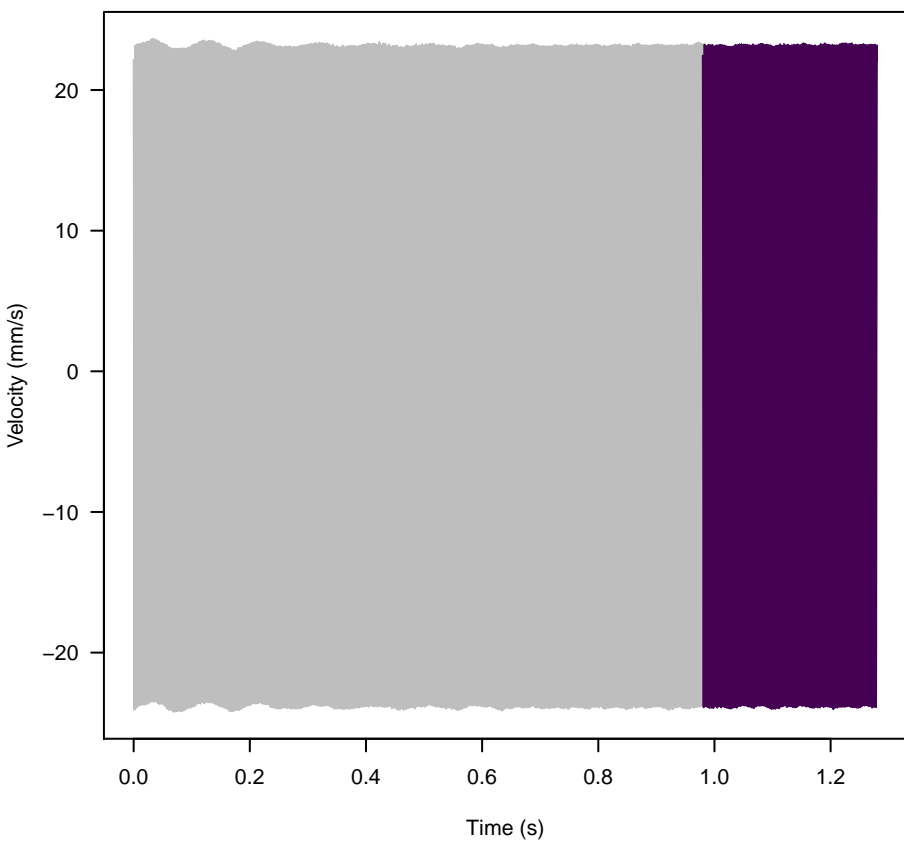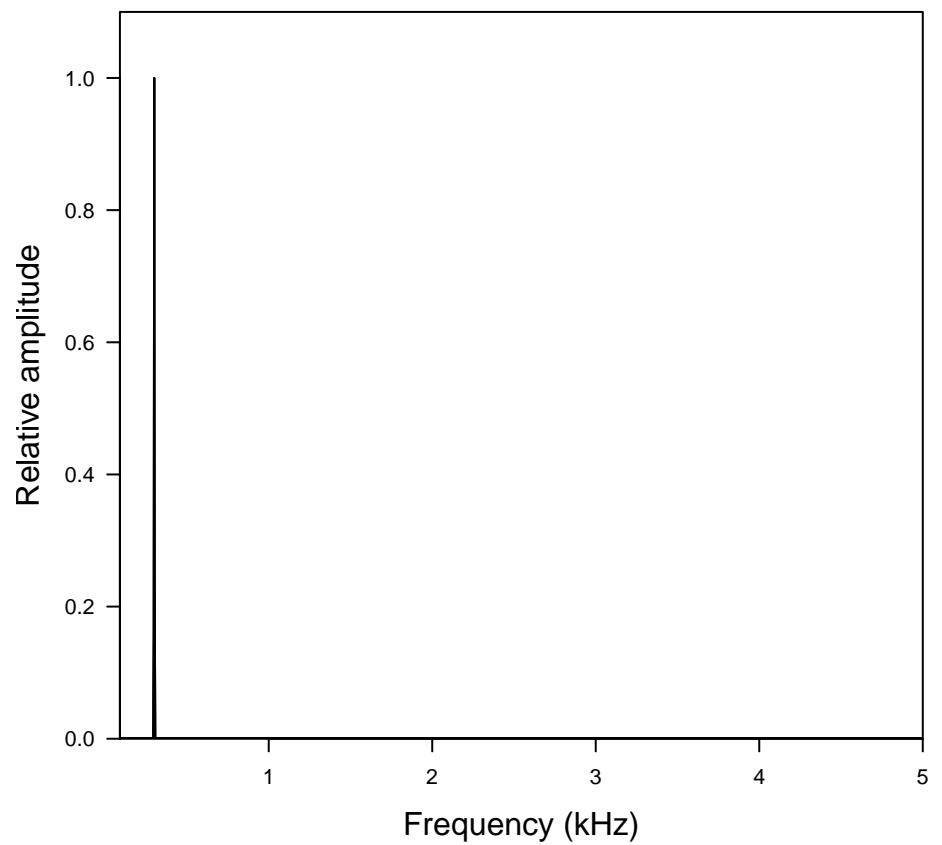

Vel. = 0.028 ; Str. = PA ; Axis = z ; Fl. accession = 10-s-81-1AB

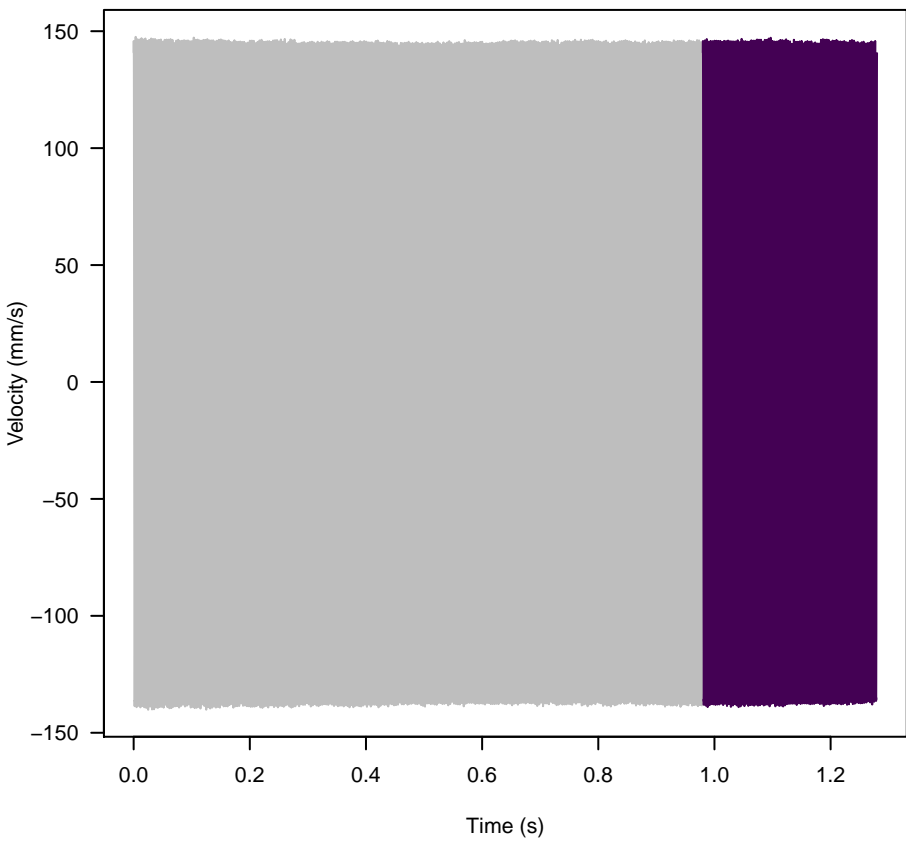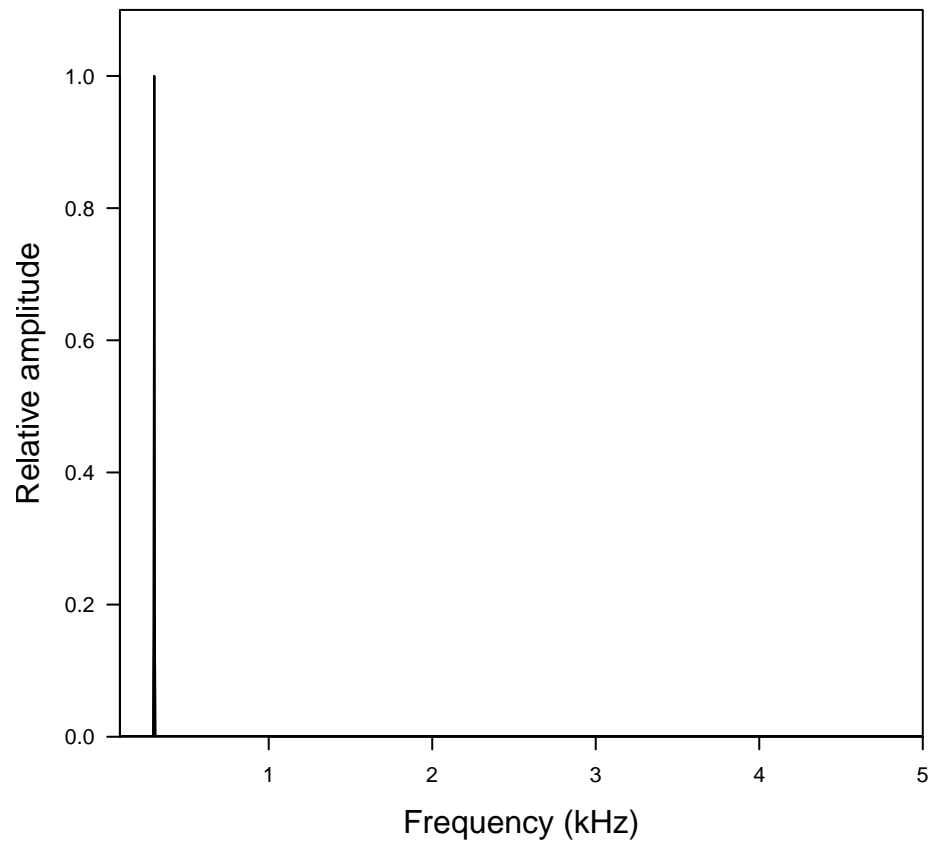

Vel. = 0.028 ; Str. = Receptacle ; Axis = z ; Fl. accession = 10-s-81-1AB

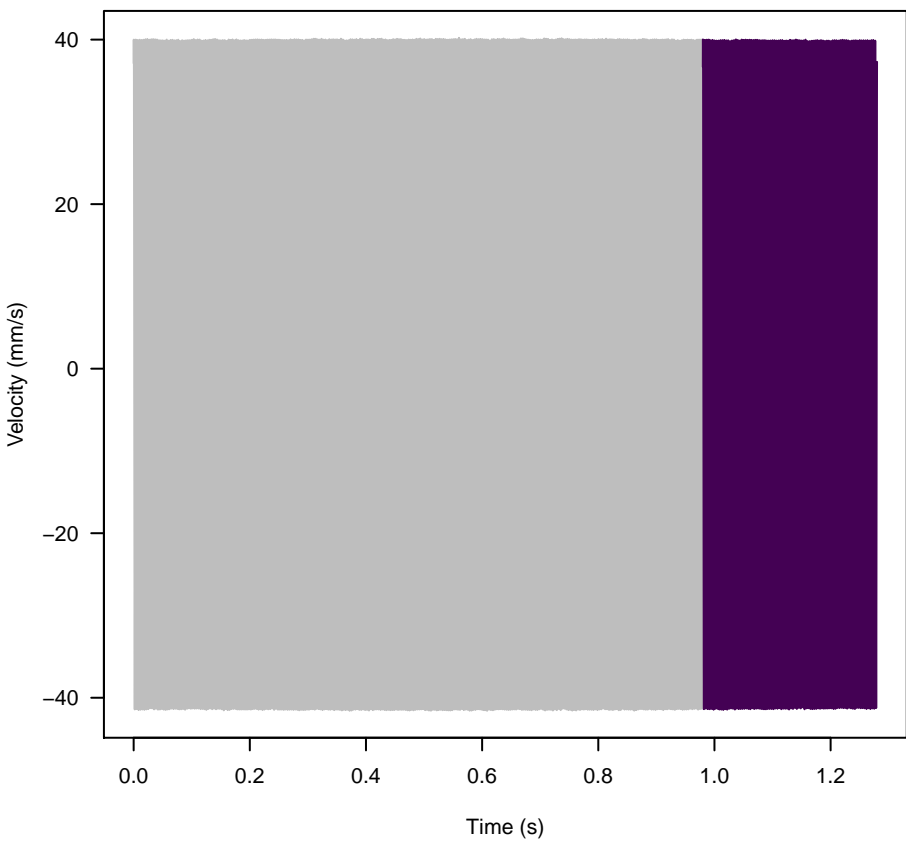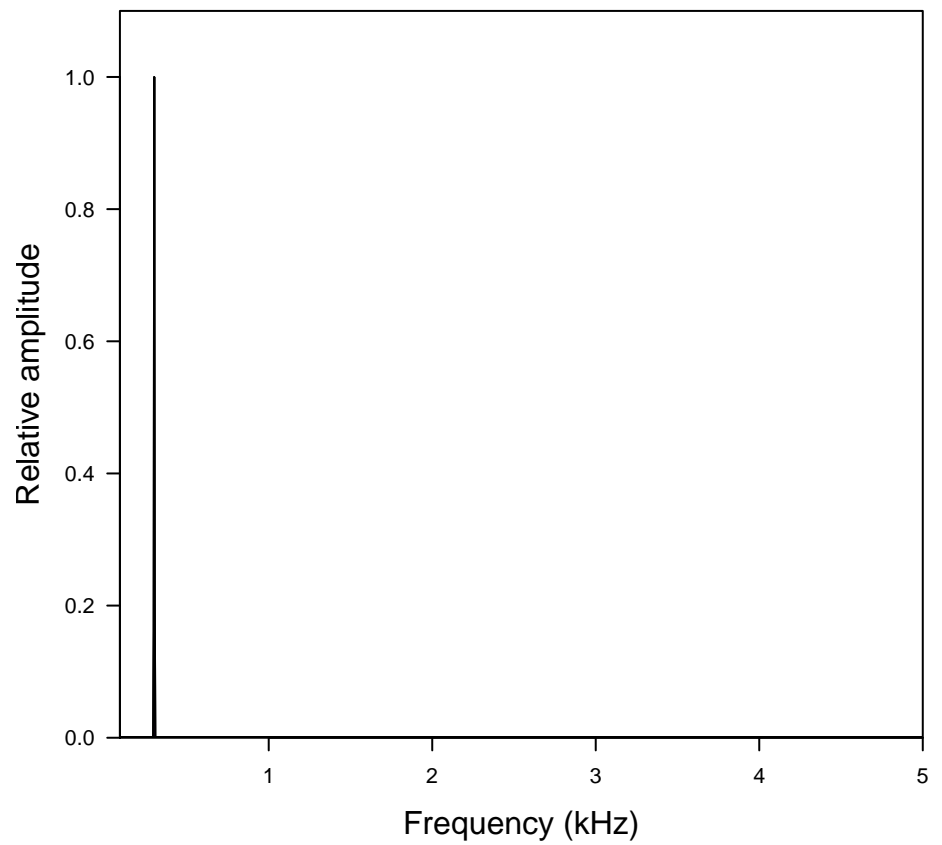

Vel. = 0.028 ; Str. = FA ; Axis = z ; Fl. accession = 10-s-81-1AB

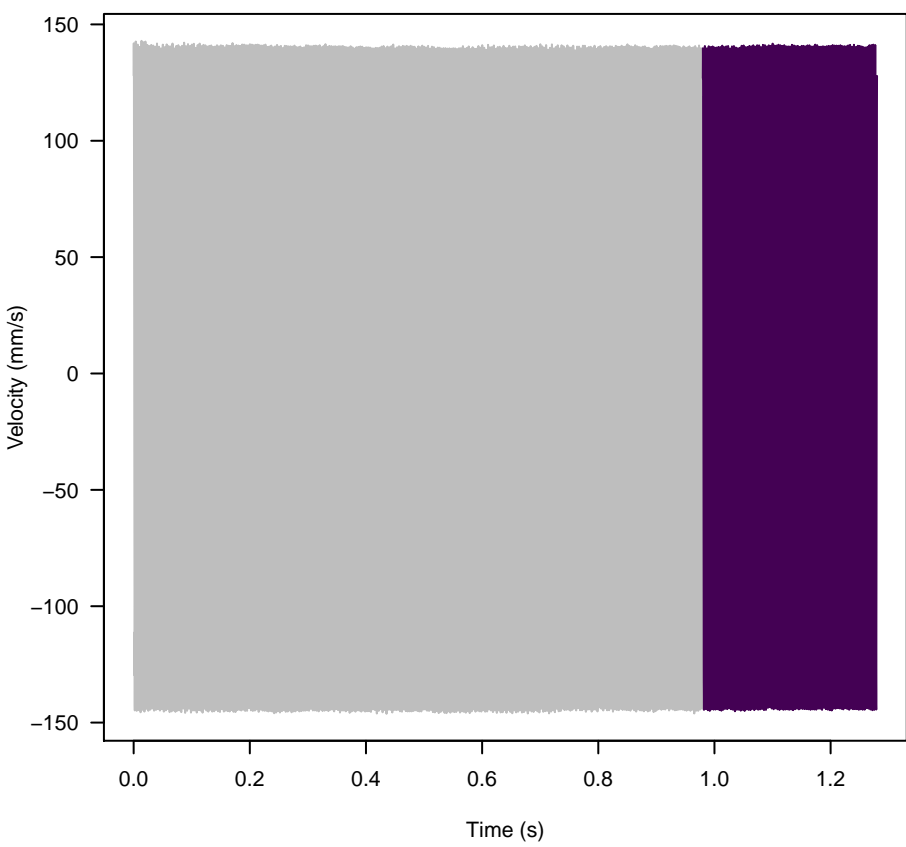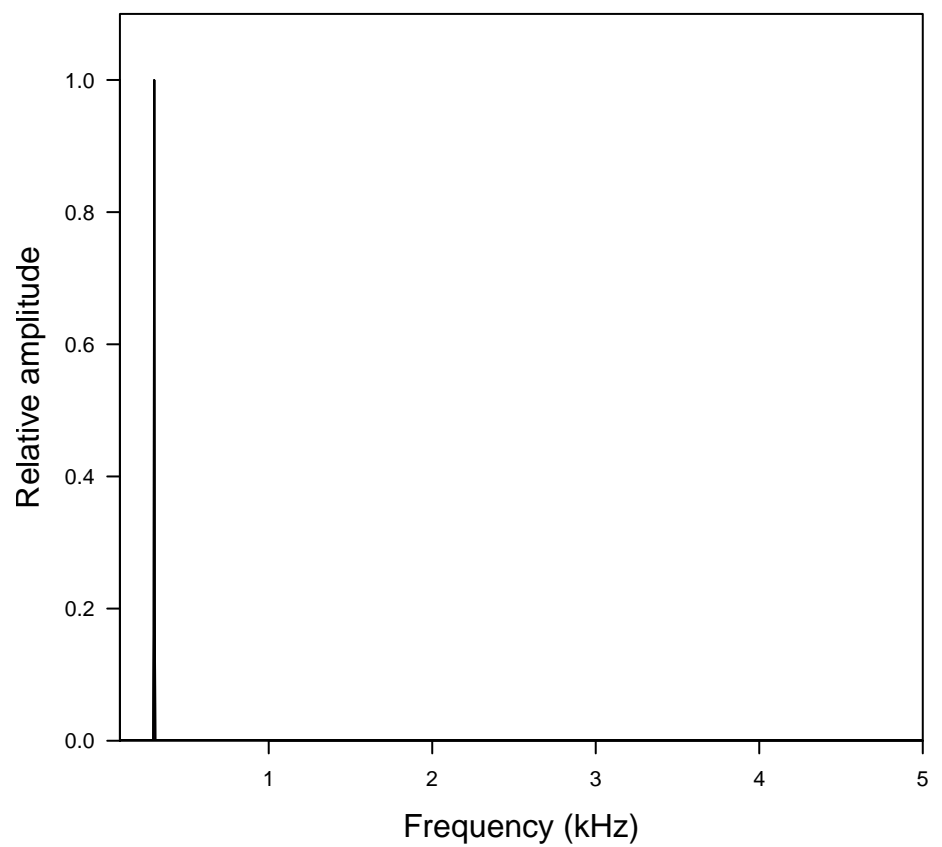

Vel. = 0.028 ; Str. = Receptacle ; Axis = z ; Fl. accession = 10-s-81-1AB

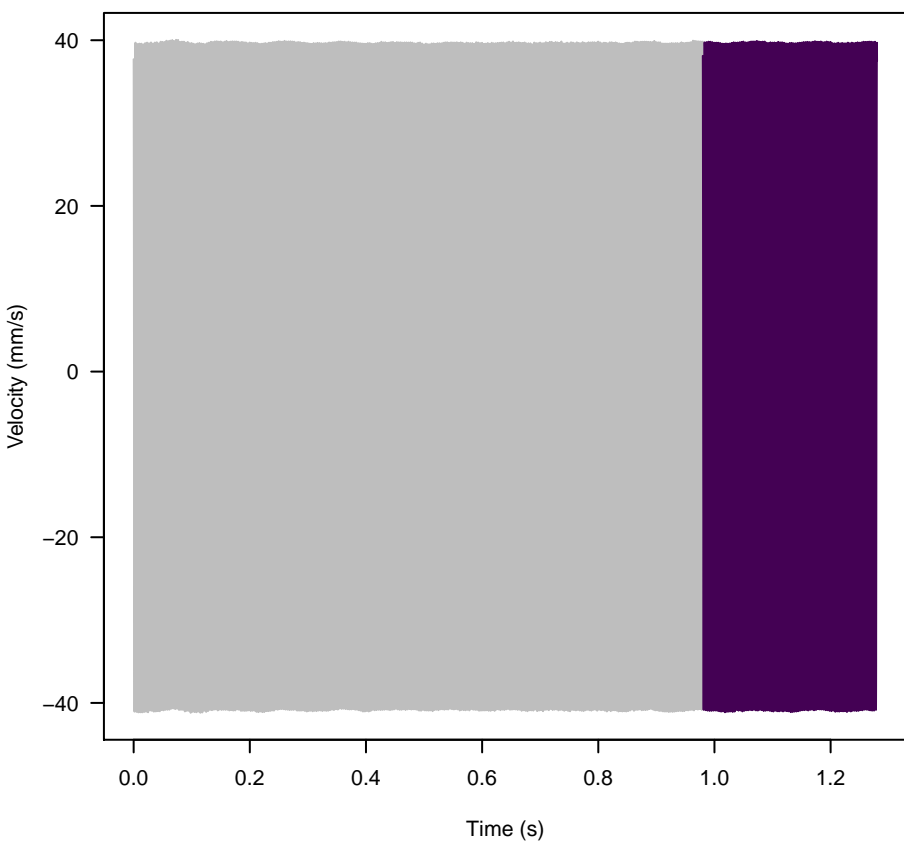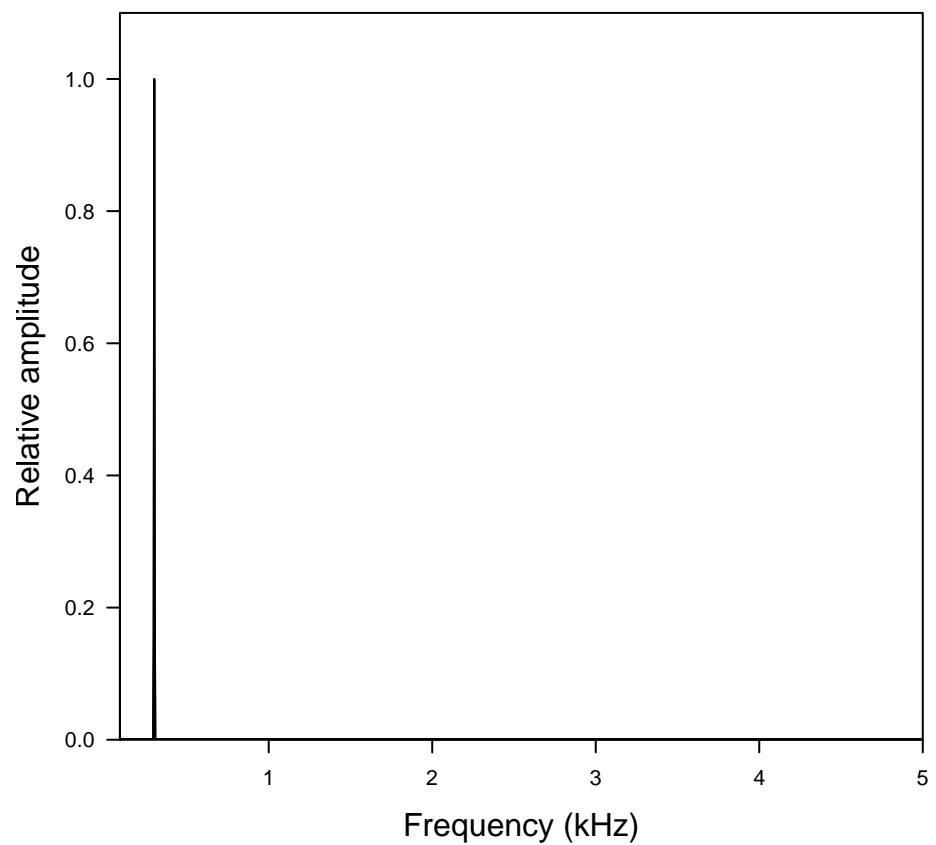

Vel. = 0.028 ; Str. = Corolla ; Axis = z ; Fl. accession = 10-s-81-1AB

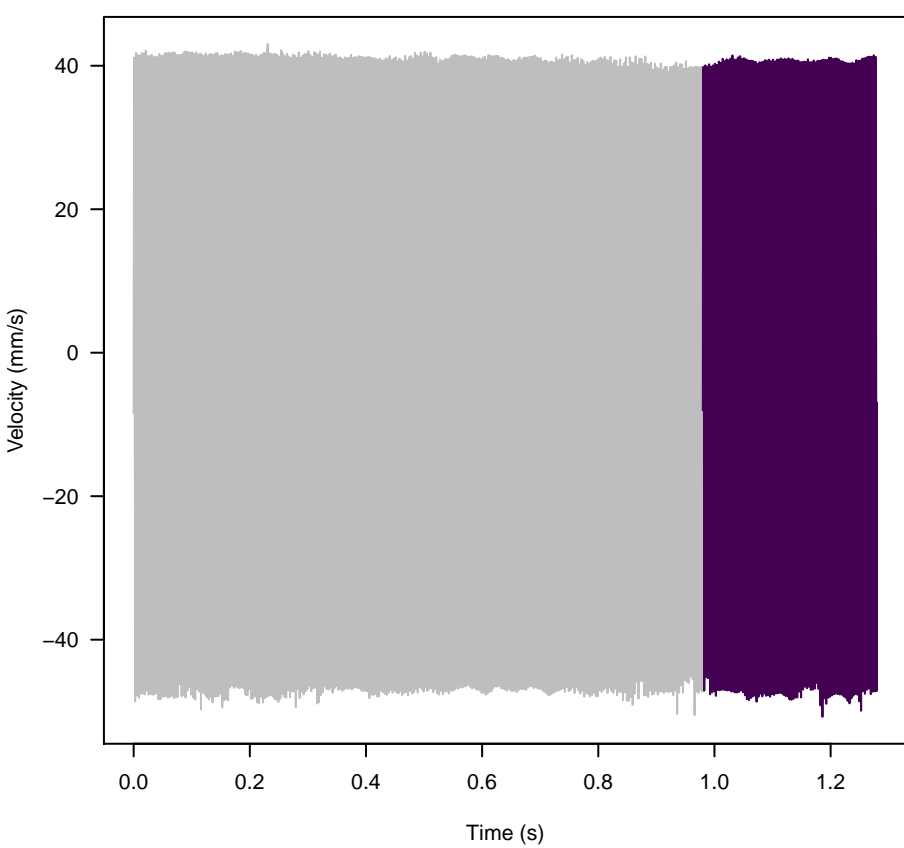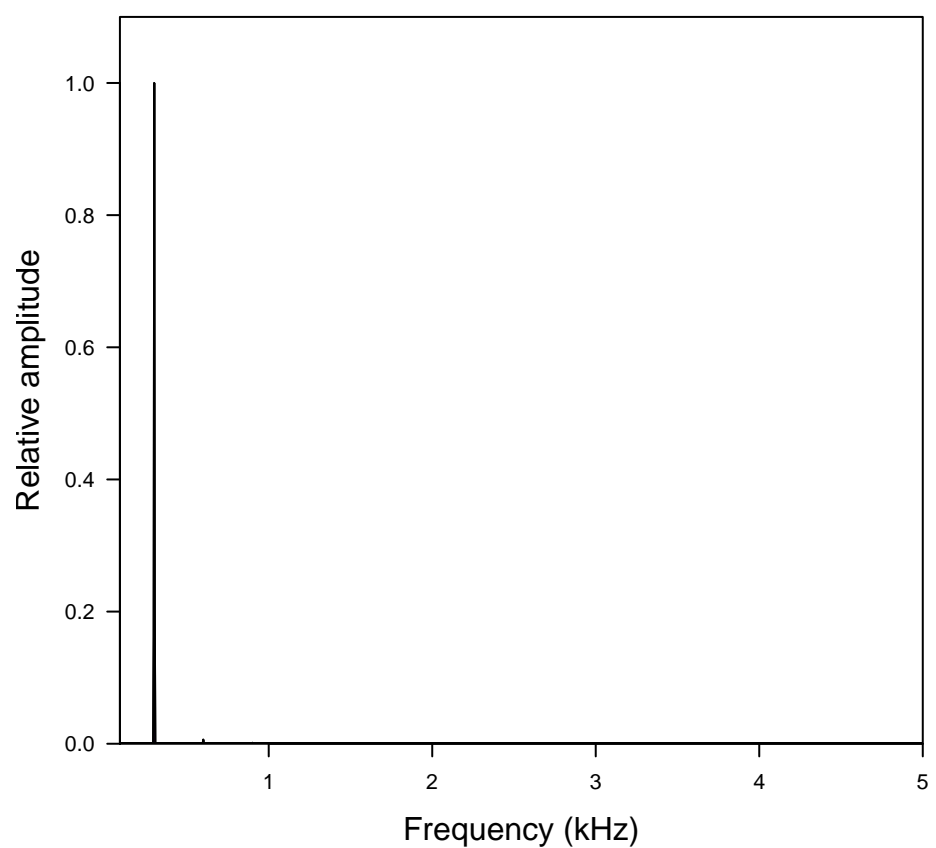

Vel. = 0.028 ; Str. = Receptacle ; Axis = z ; Fl. accession = 10-s-81-1AB

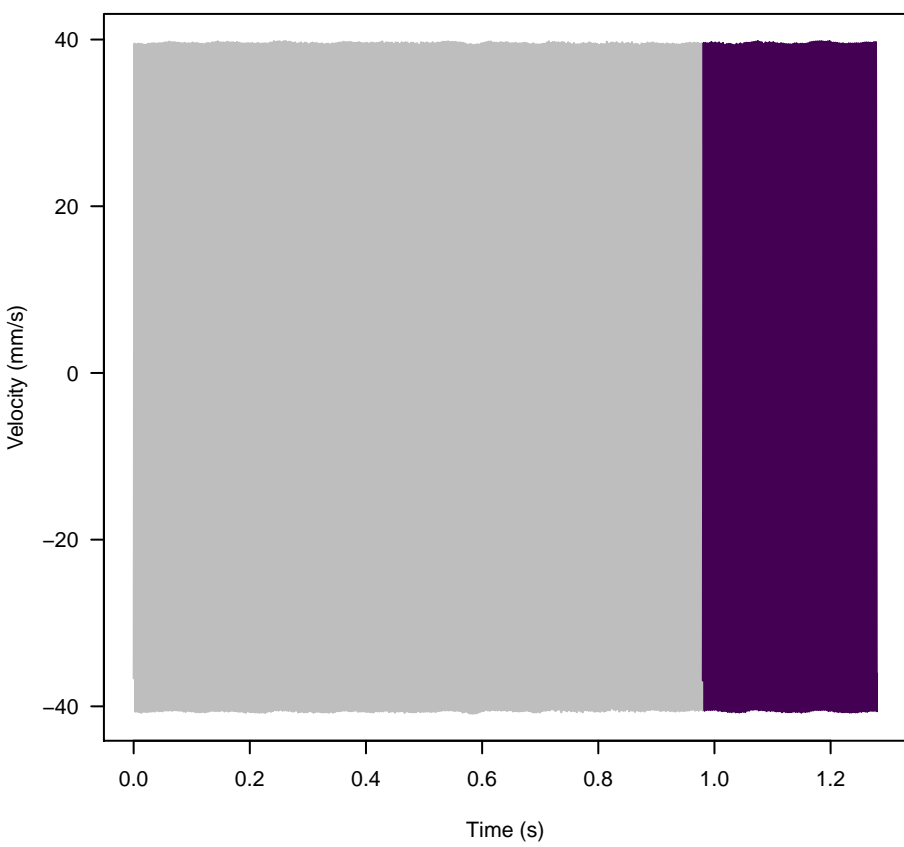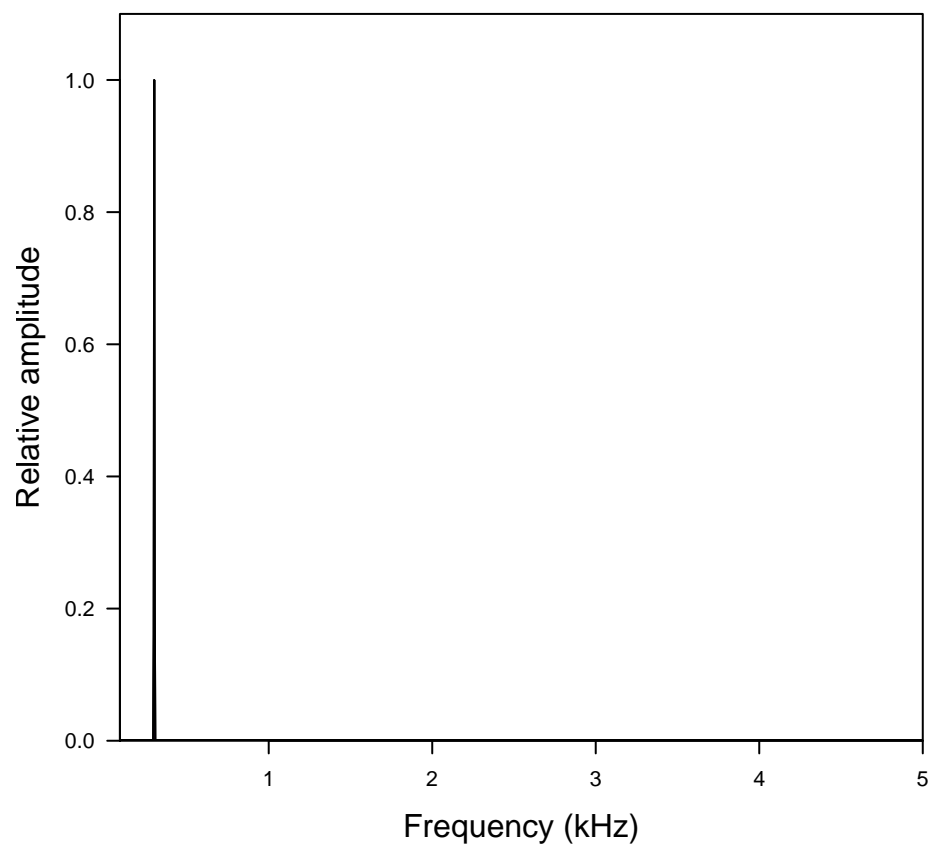

Vel. = 0.057 ; Str. = Corolla ; Axis = z ; Fl. accession = 10-s-81-1AB

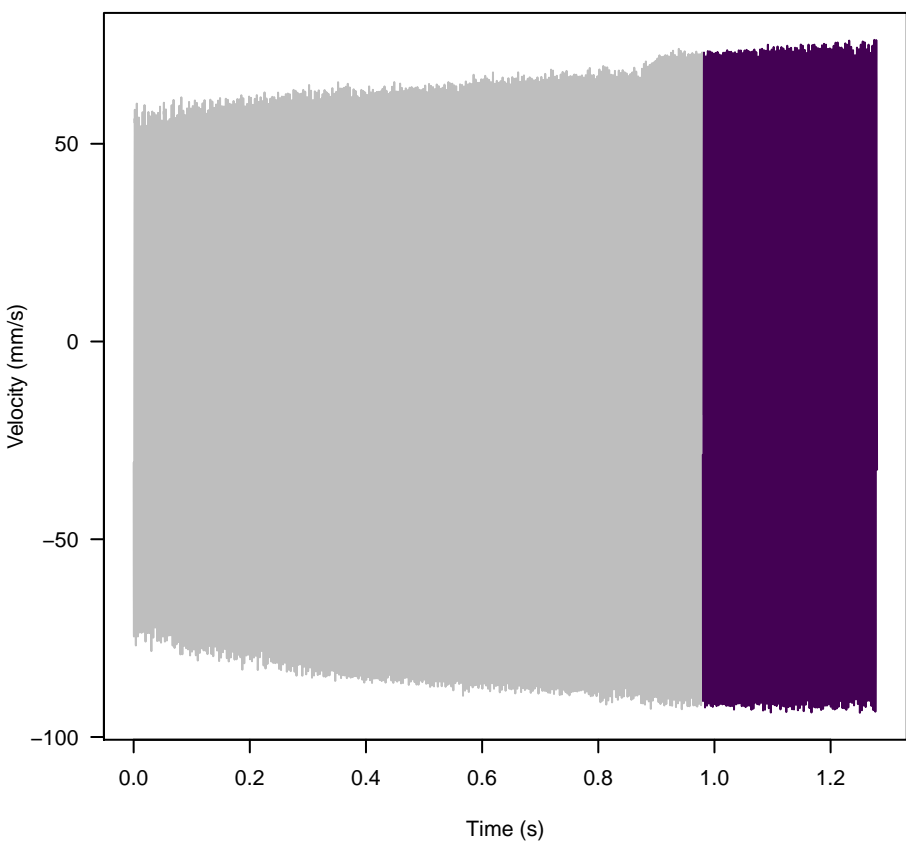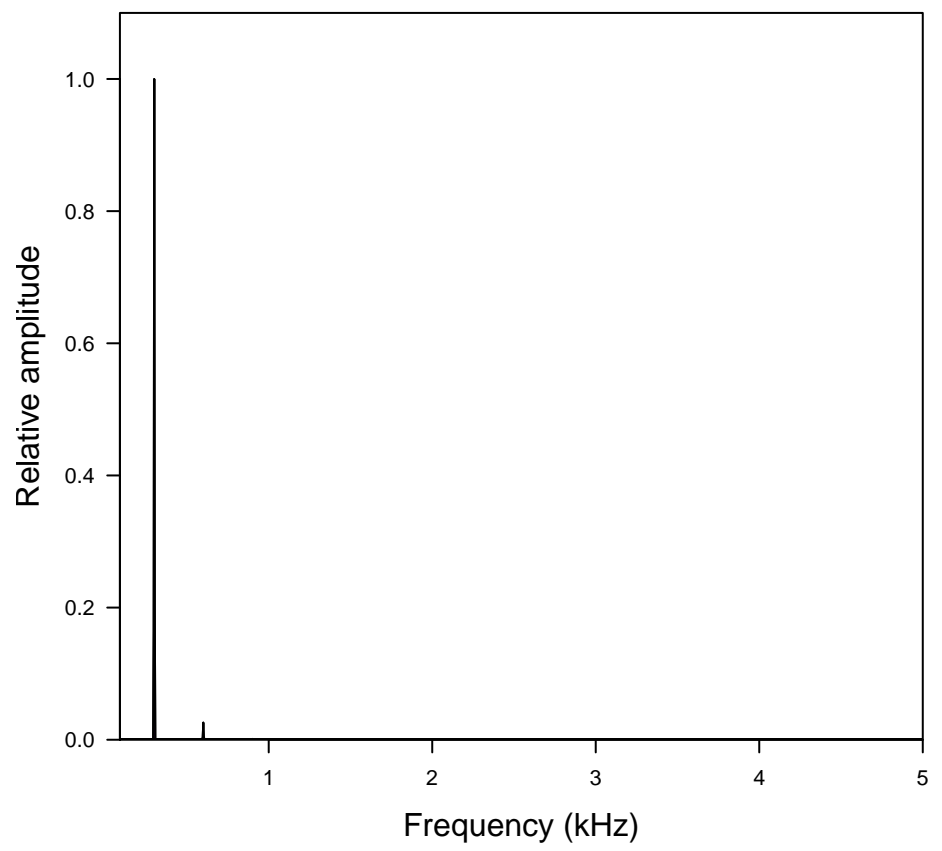

Vel. = 0.057 ; Str. = Receptacle ; Axis = z ; Fl. accession = 10-s-81-1AB

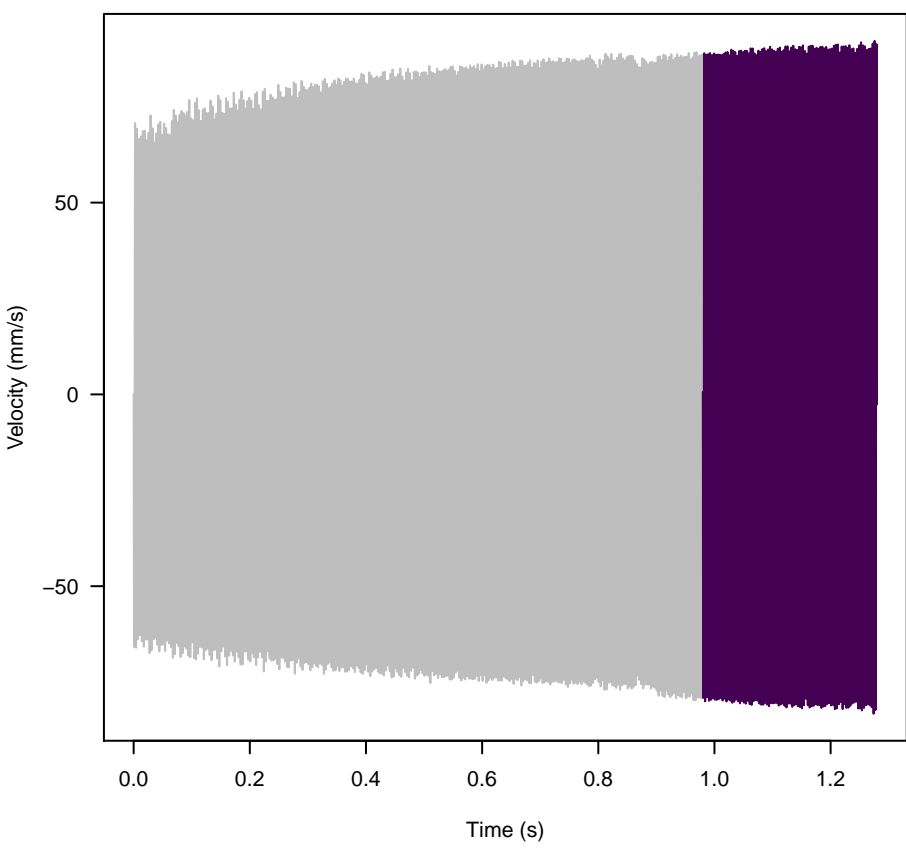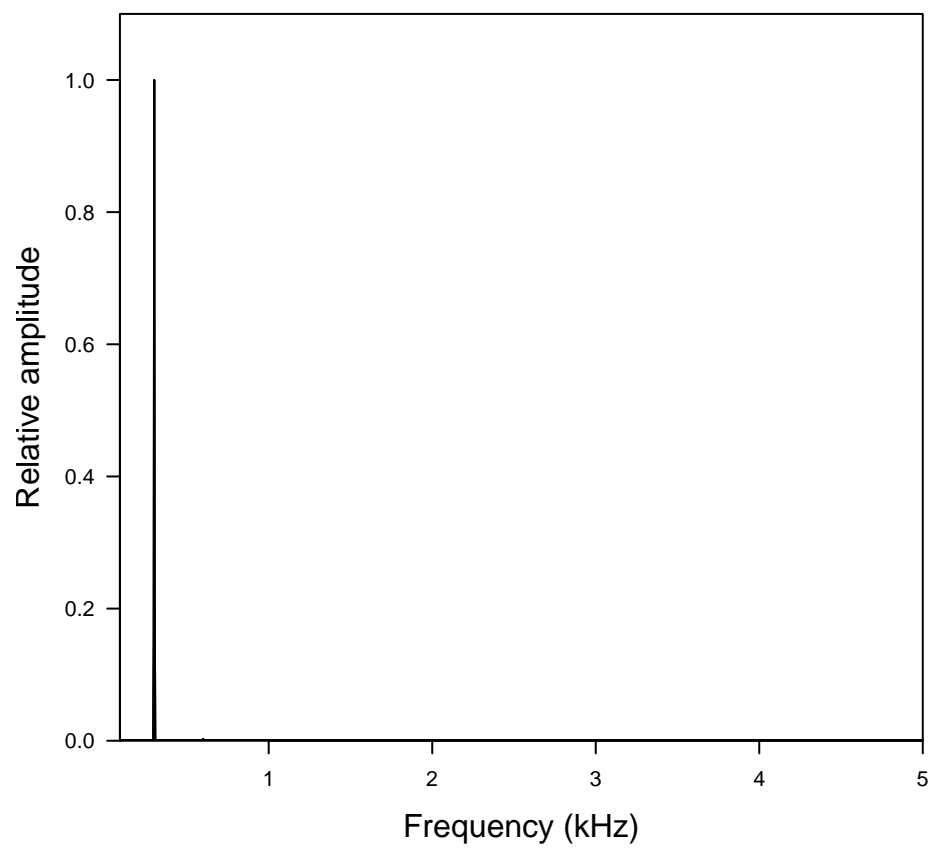

Vel. = 0.057 ; Str. = FA ; Axis = z ; Fl. accession = 10-s-81-1AB

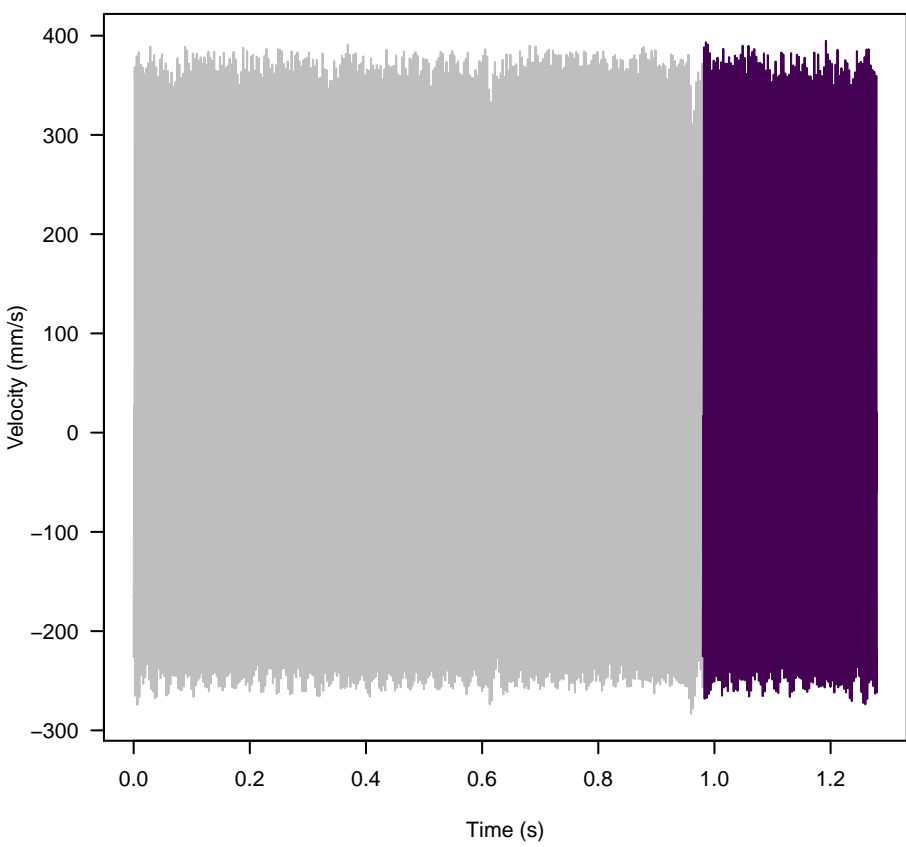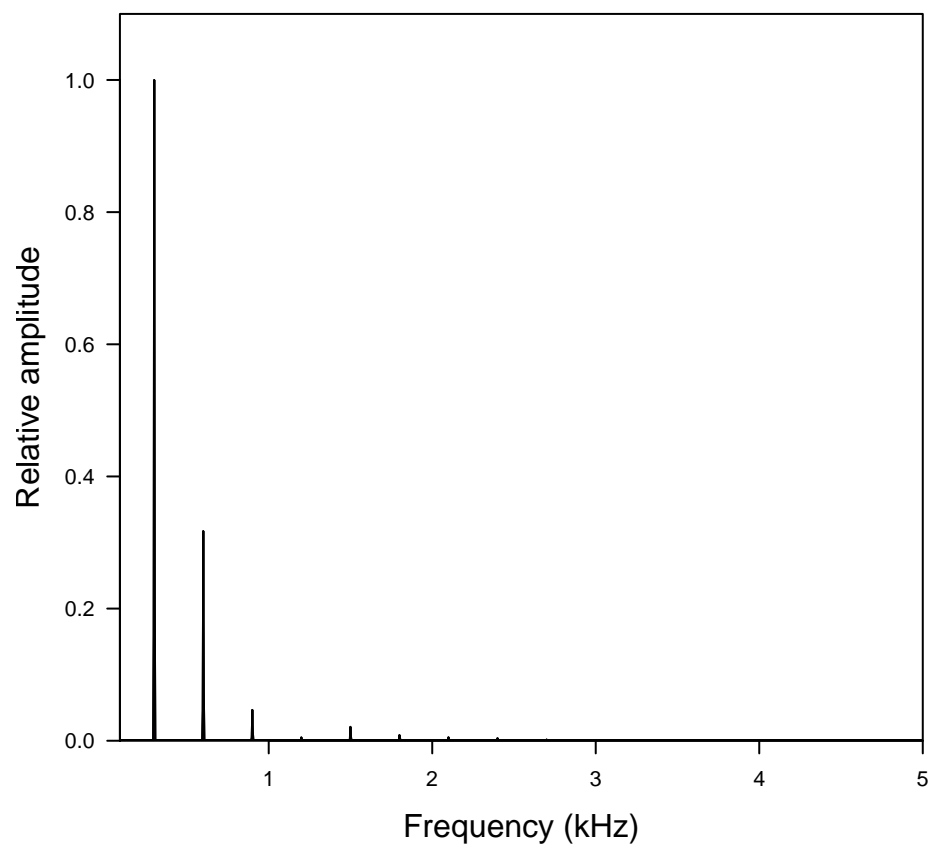

Vel. = 0.057 ; Str. = Receptacle ; Axis = z ; Fl. accession = 10-s-81-1AB

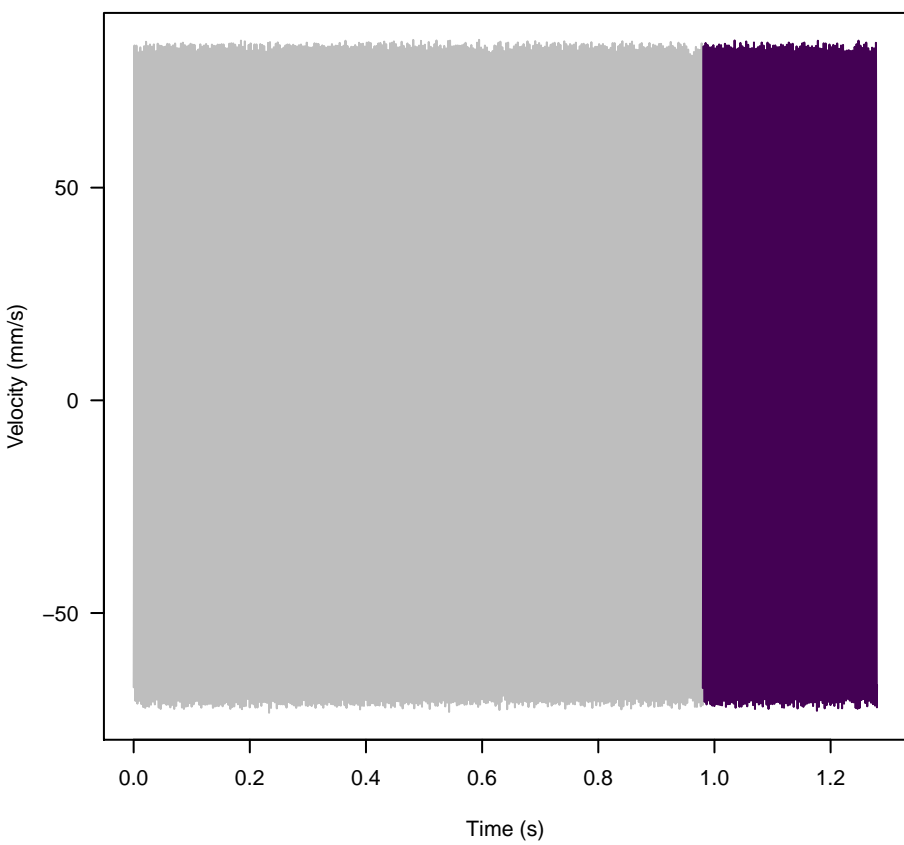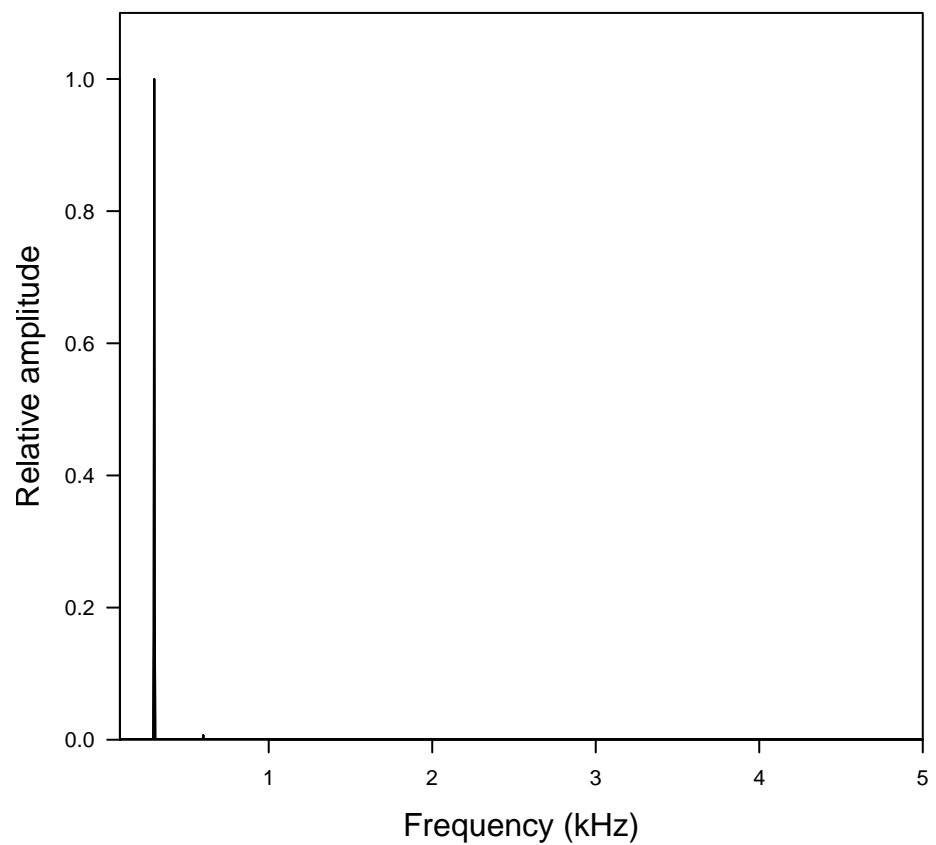

Vel. = 0.057 ; Str. = PA ; Axis = z ; Fl. accession = 10-s-81-1AB

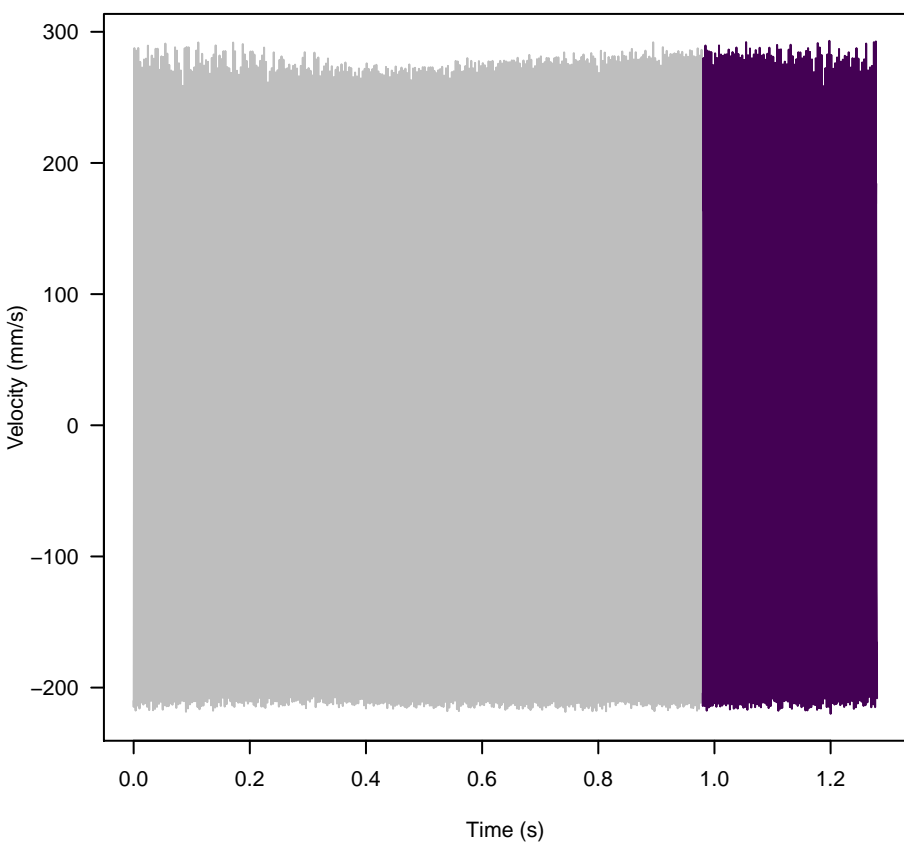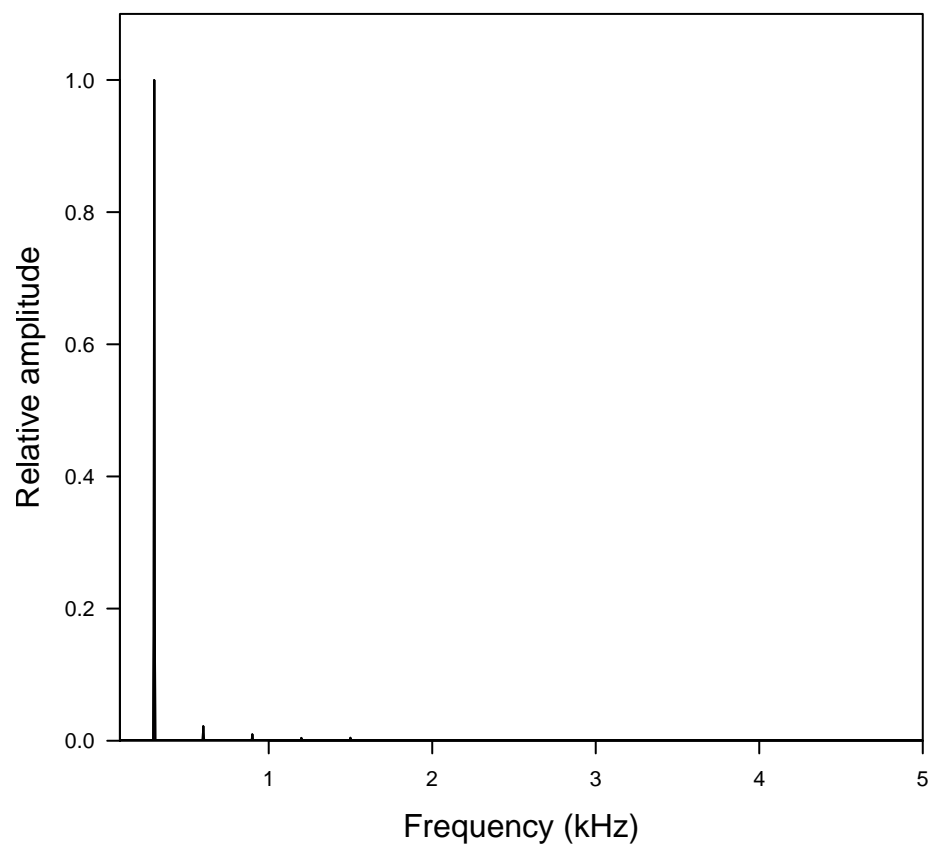

Vel. = 0.057 ; Str. = Receptacle ; Axis = z ; Fl. accession = 10-s-81-1AB

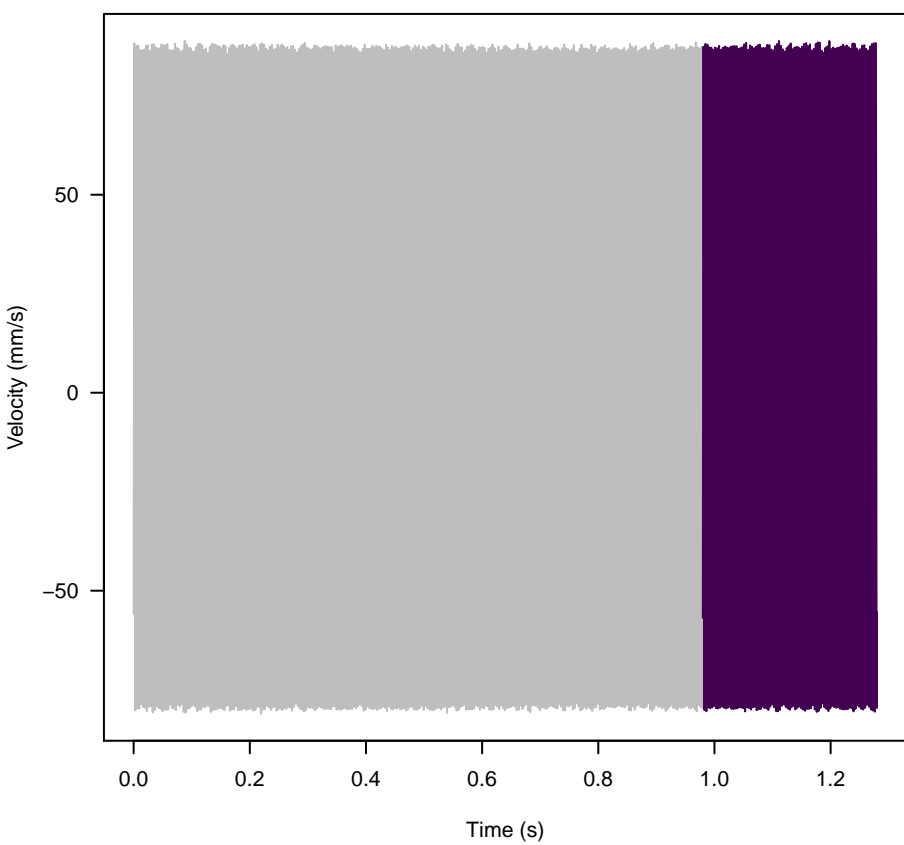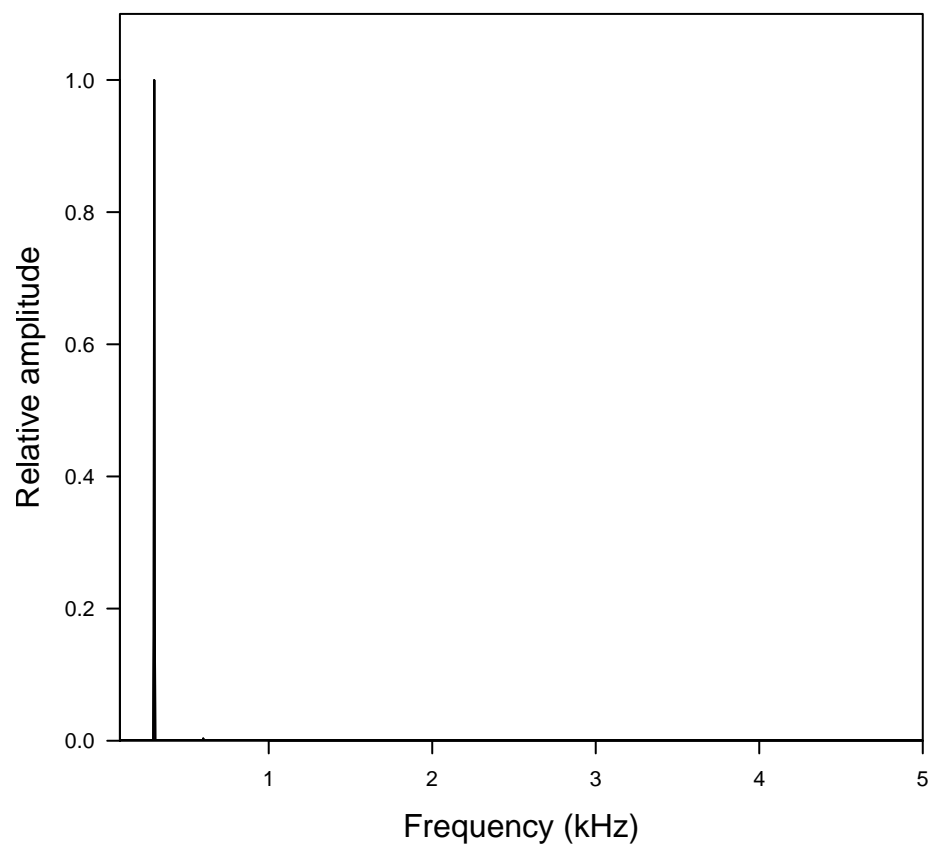

Vel. = 0.057 ; Str. = Corolla ; Axis = x ; Fl. accession = 10-s-81-1AB

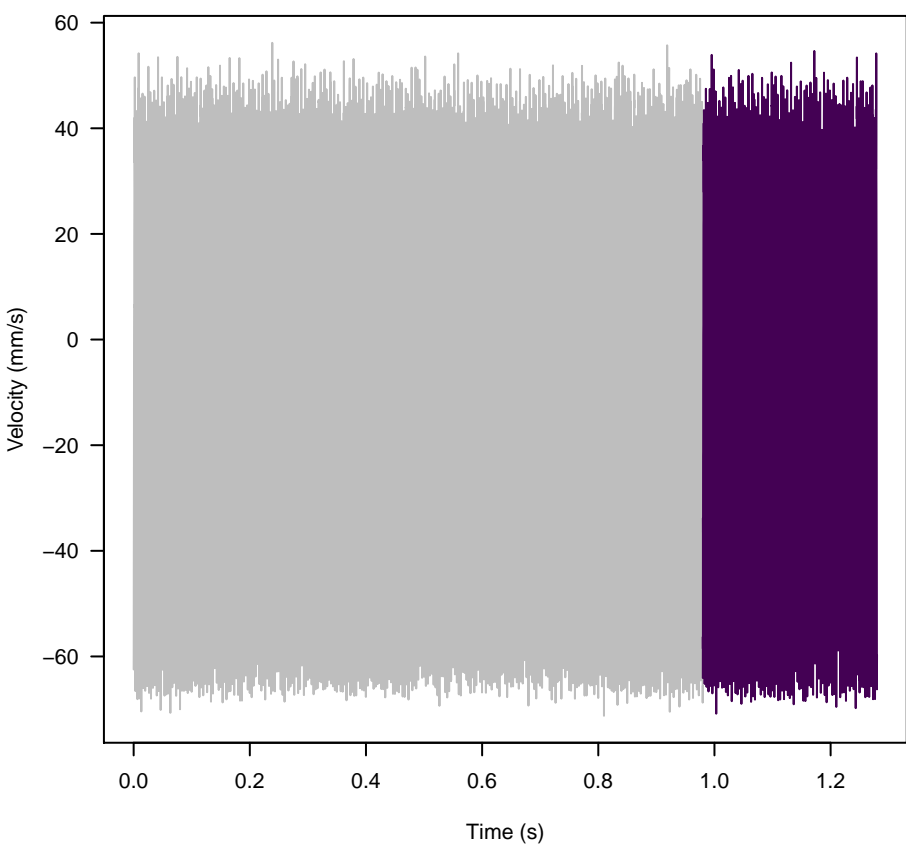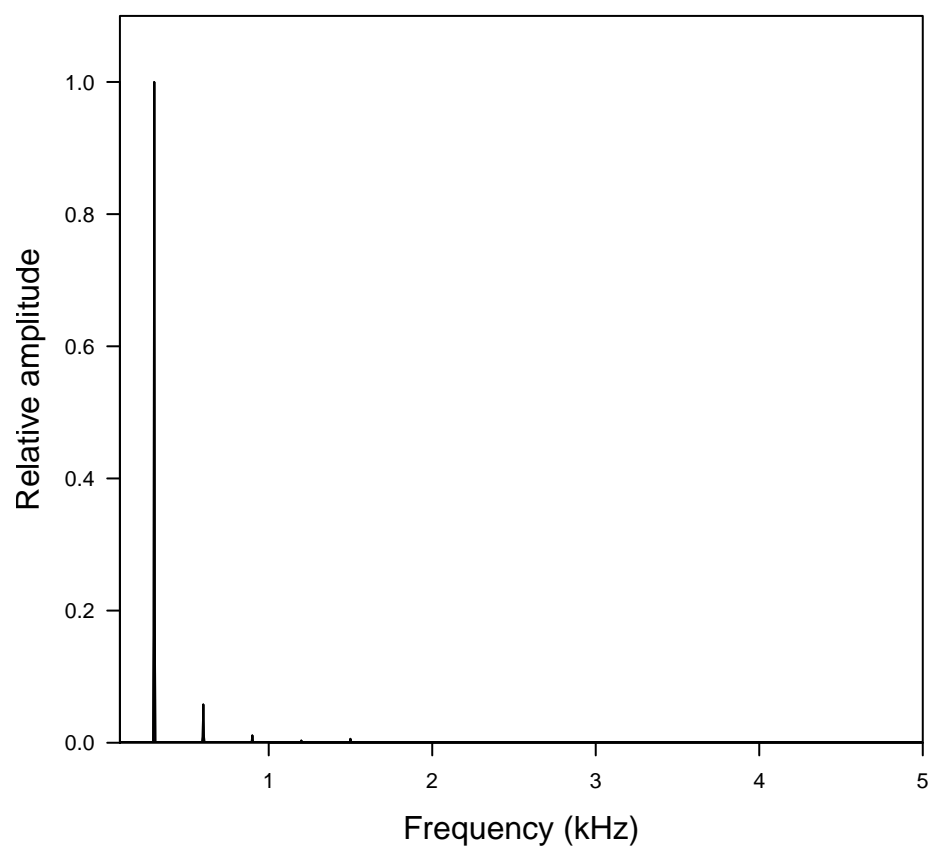

Vel. = 0.057 ; Str. = Receptacle ; Axis = x ; Fl. accession = 10-s-81-1AB

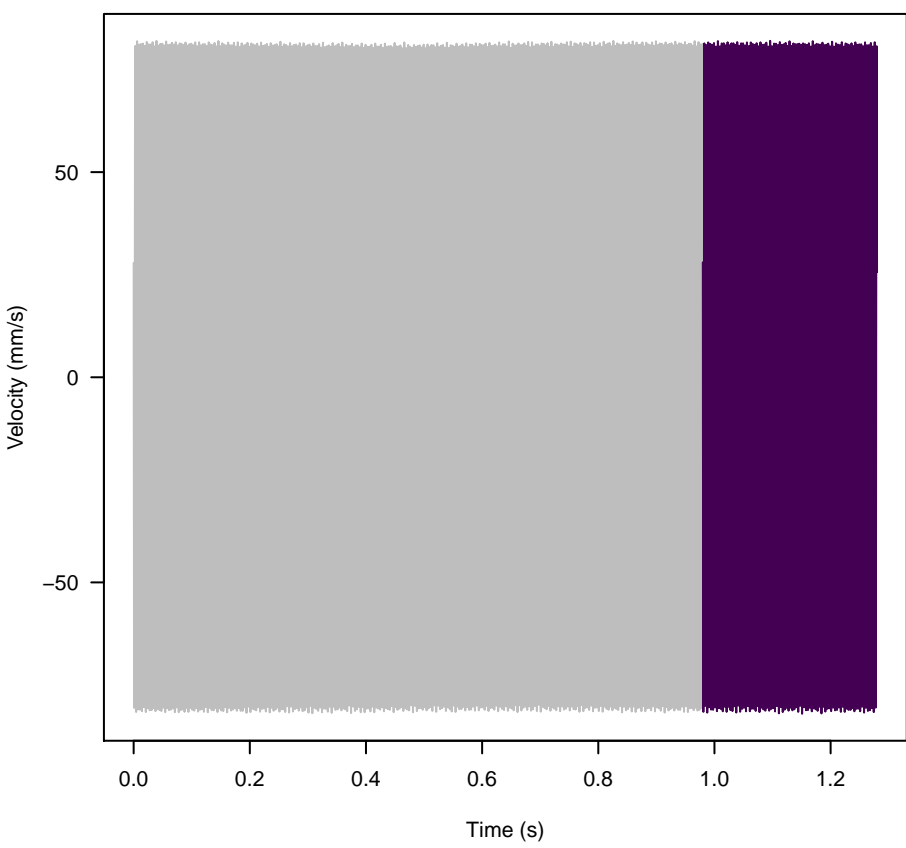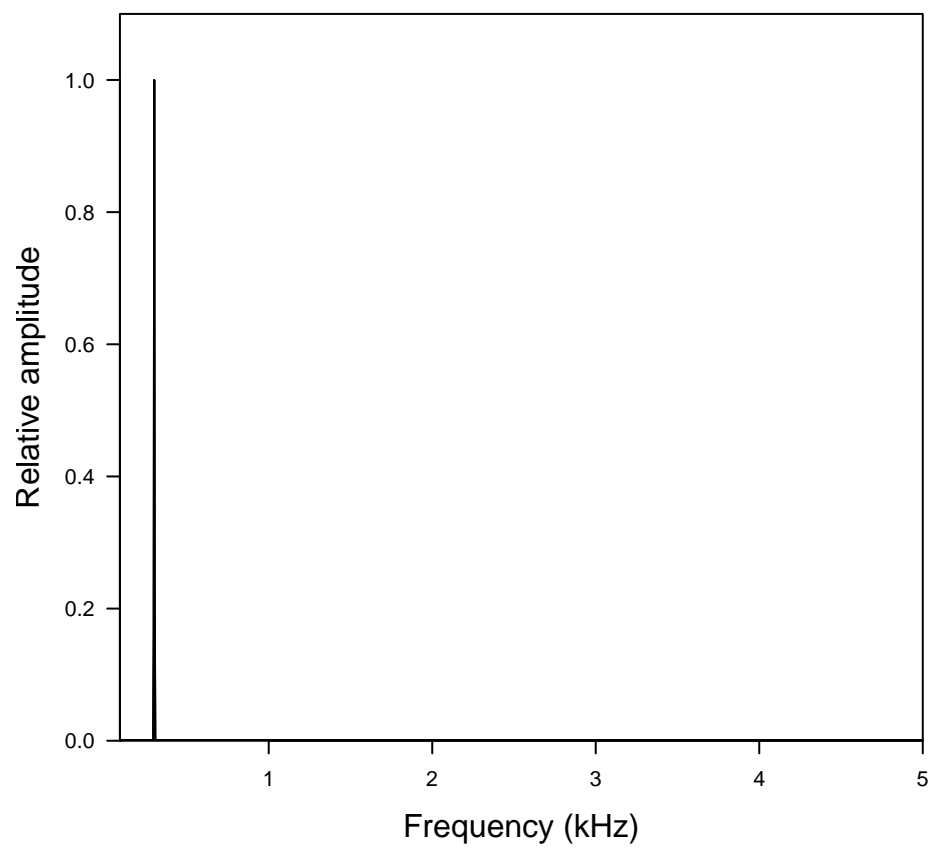

Vel. = 0.057 ; Str. = FA ; Axis = x ; Fl. accession = 10-s-81-1AB

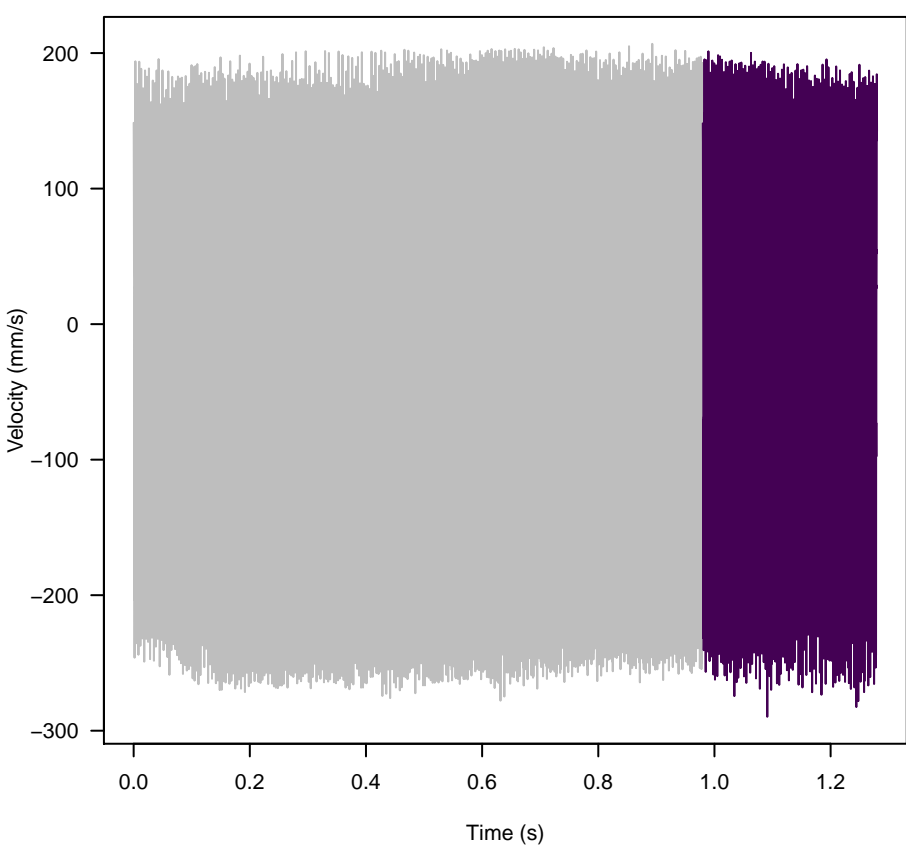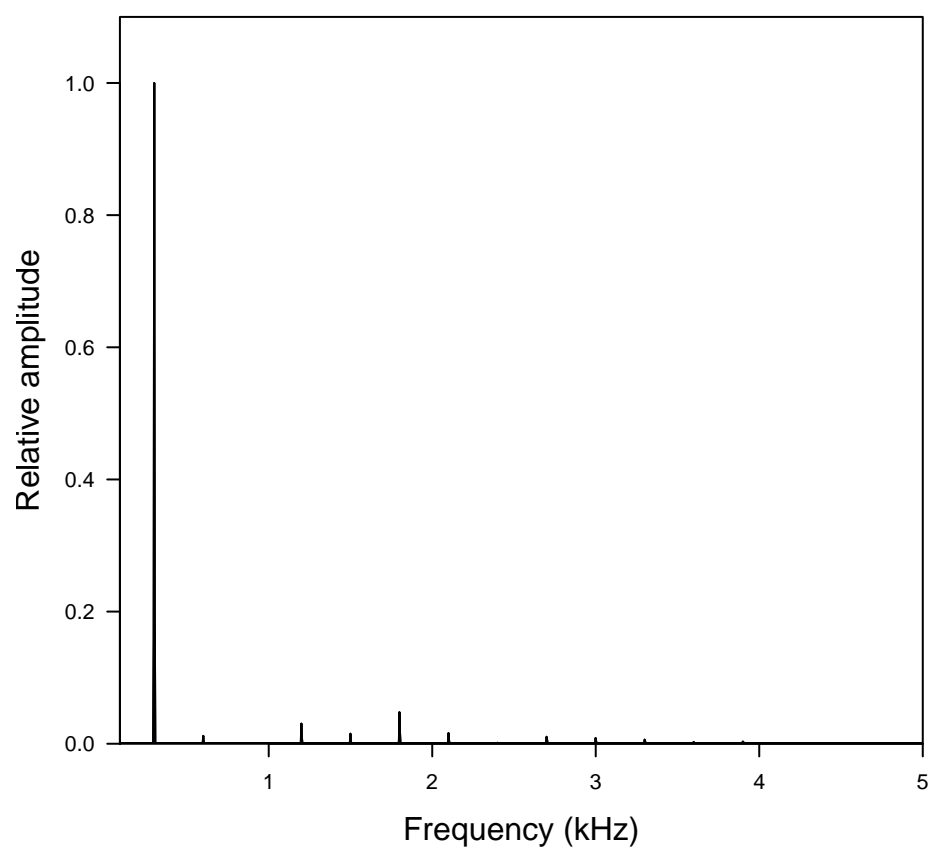

Vel. = 0.057 ; Str. = Receptacle ; Axis = x ; Fl. accession = 10-s-81-1AB

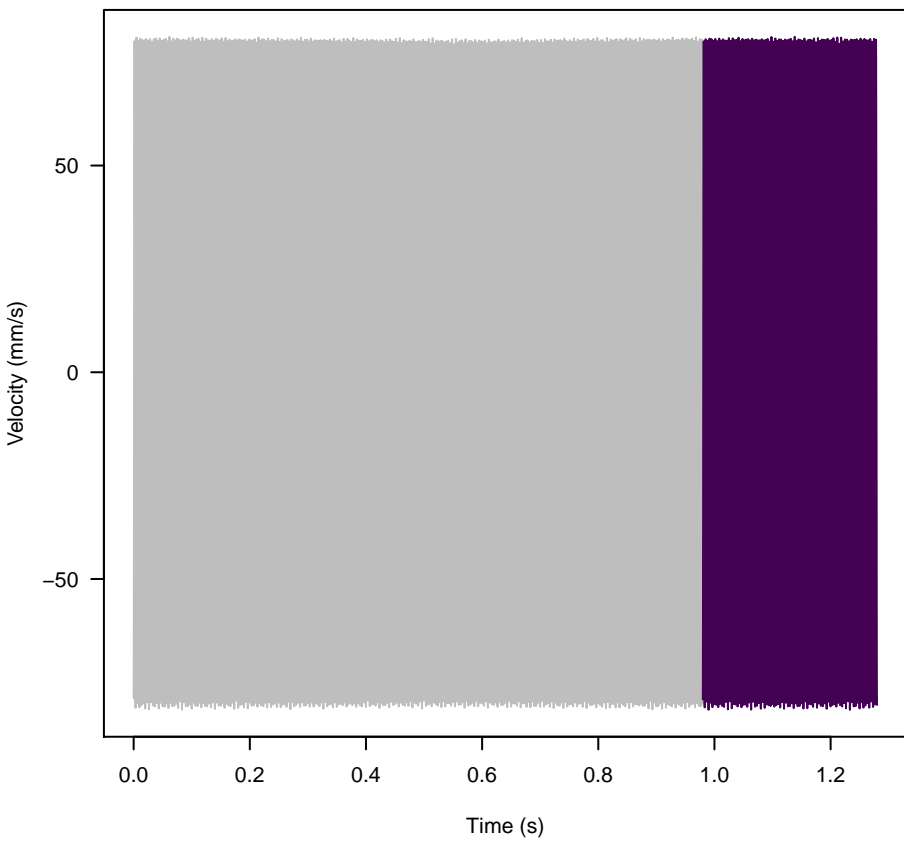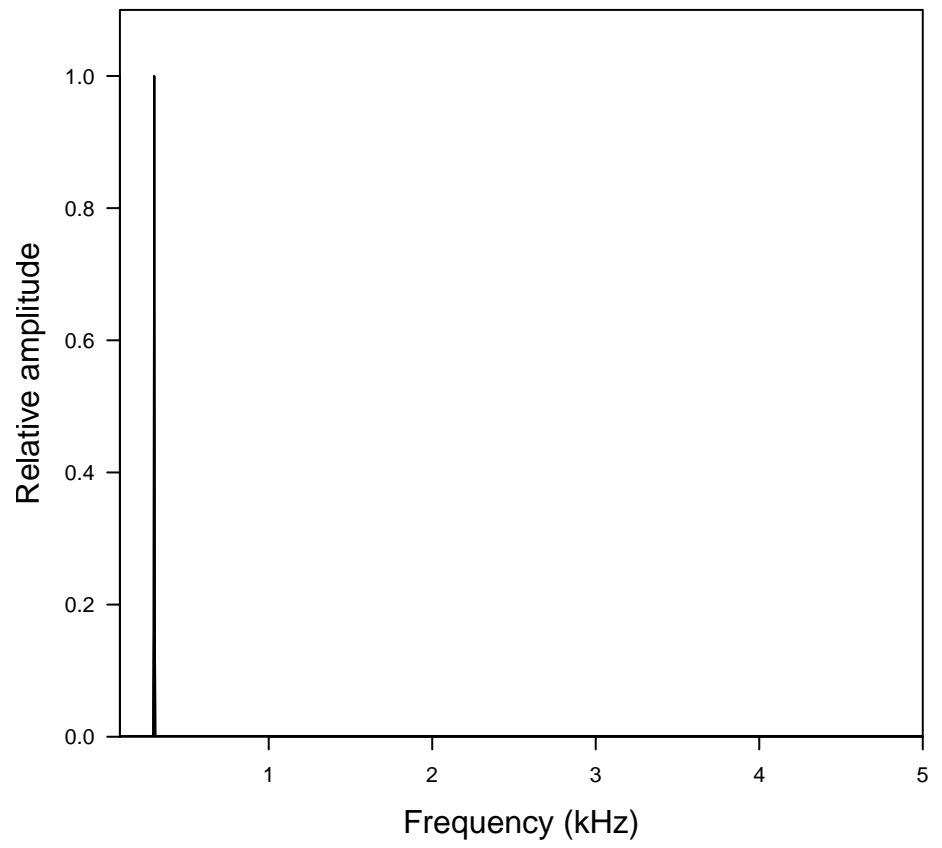

Vel. = 0.057 ; Str. = PA ; Axis = x ; Fl. accession = 10-s-81-1AB

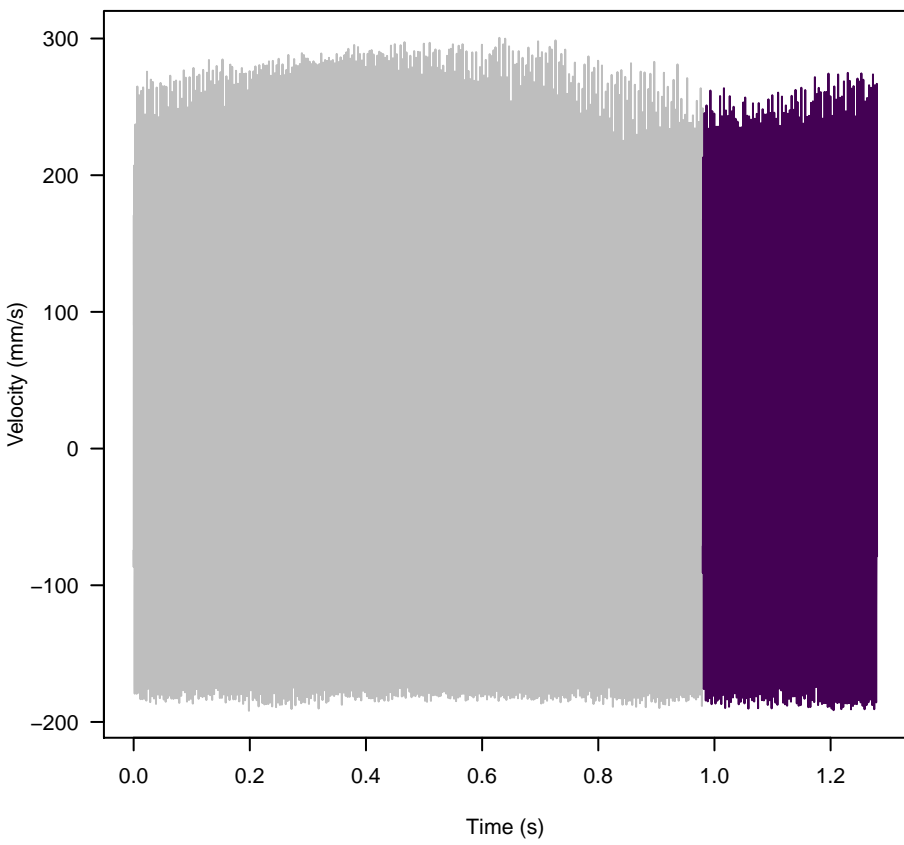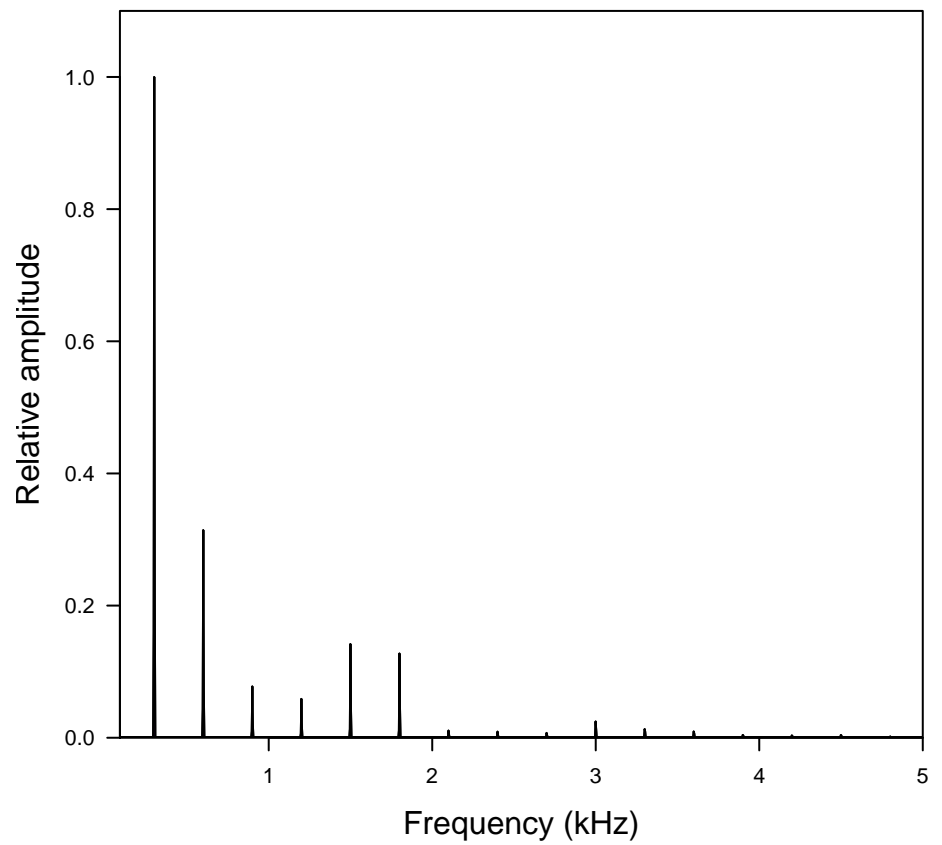

Vel. = 0.057 ; Str. = Receptacle ; Axis = x ; Fl. accession = 10-s-81-1AB

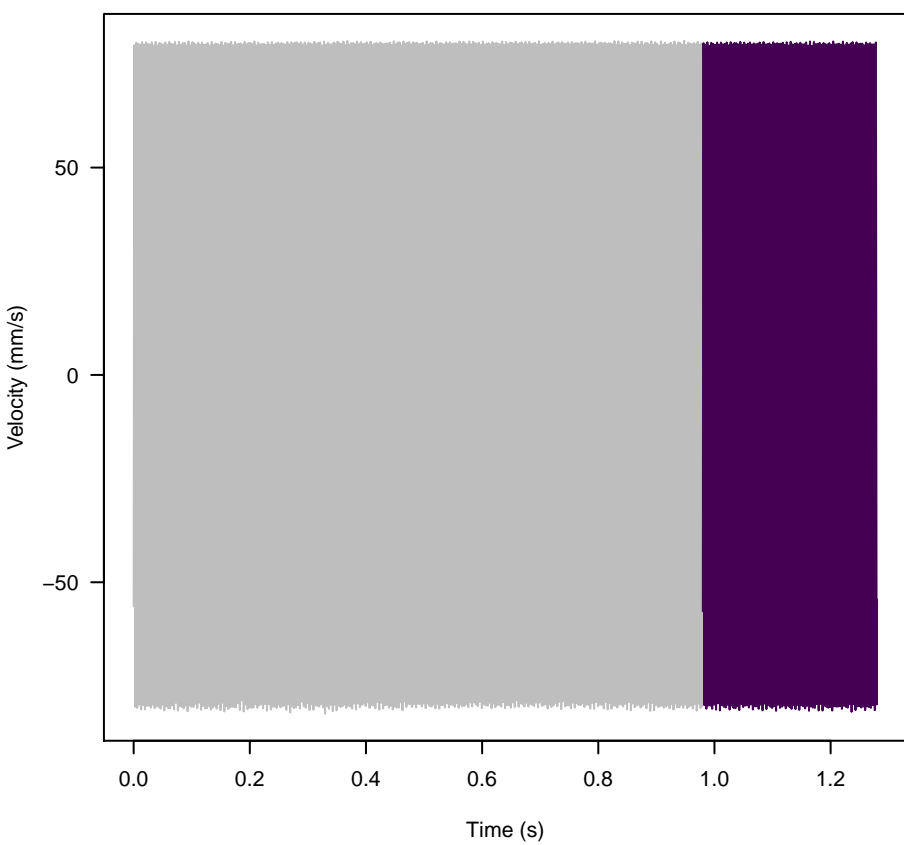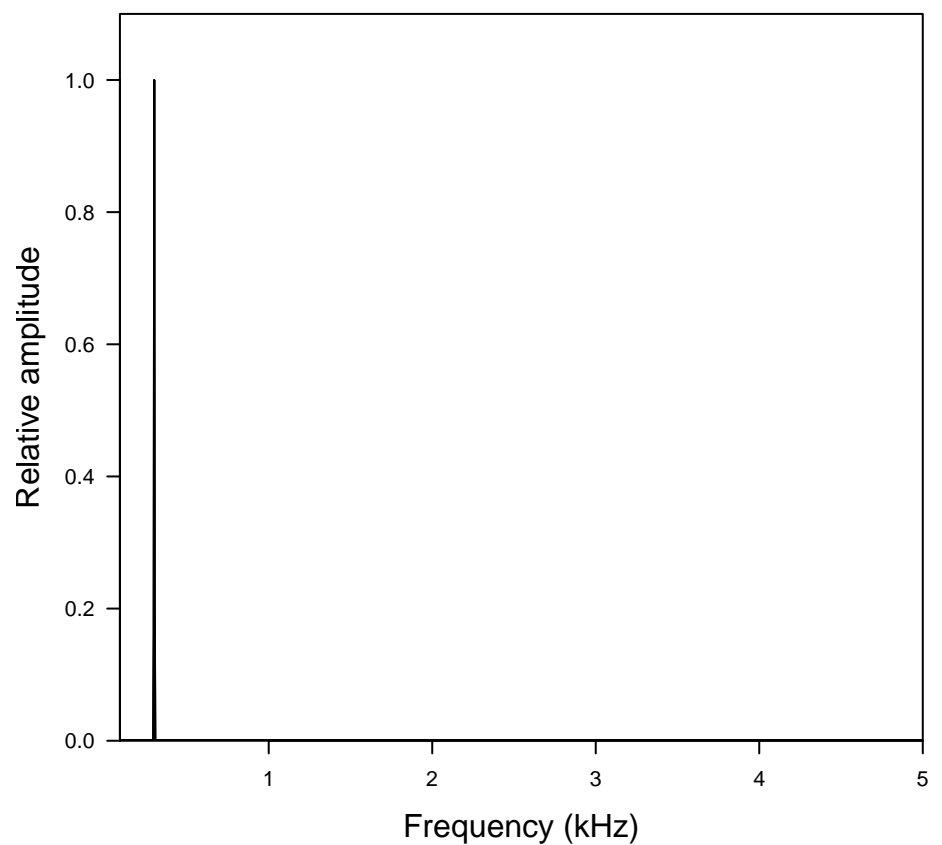



Vel. = 0.028 ; Str. = PA ; Axis = x ; Fl. accession = 10-s-81-1AB

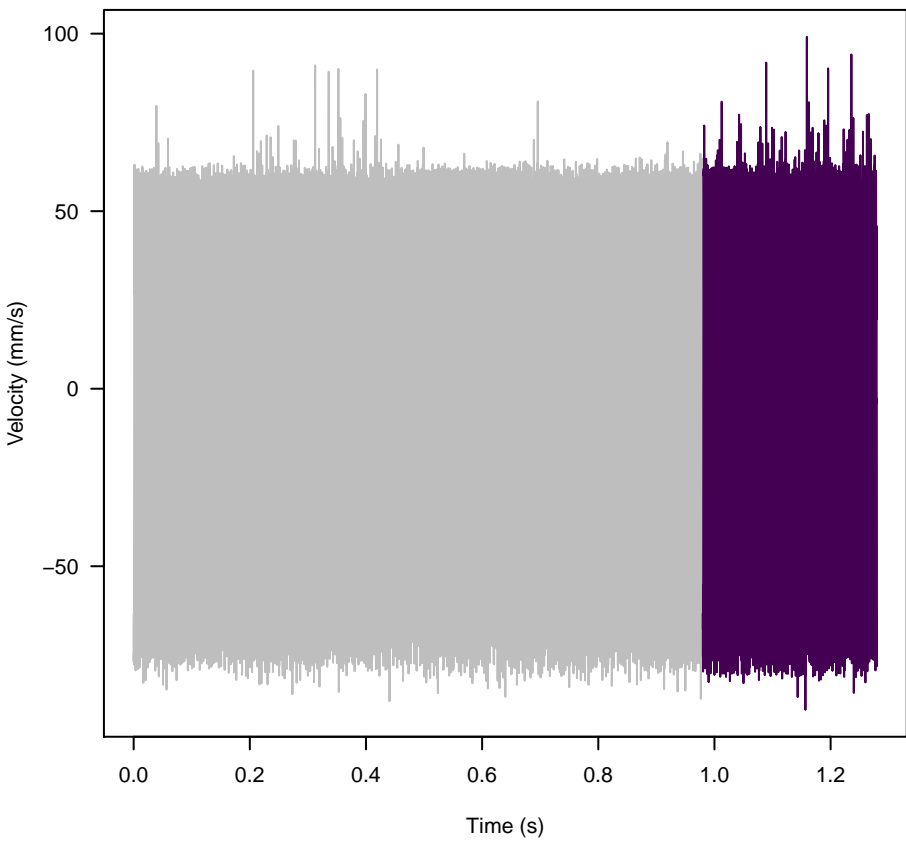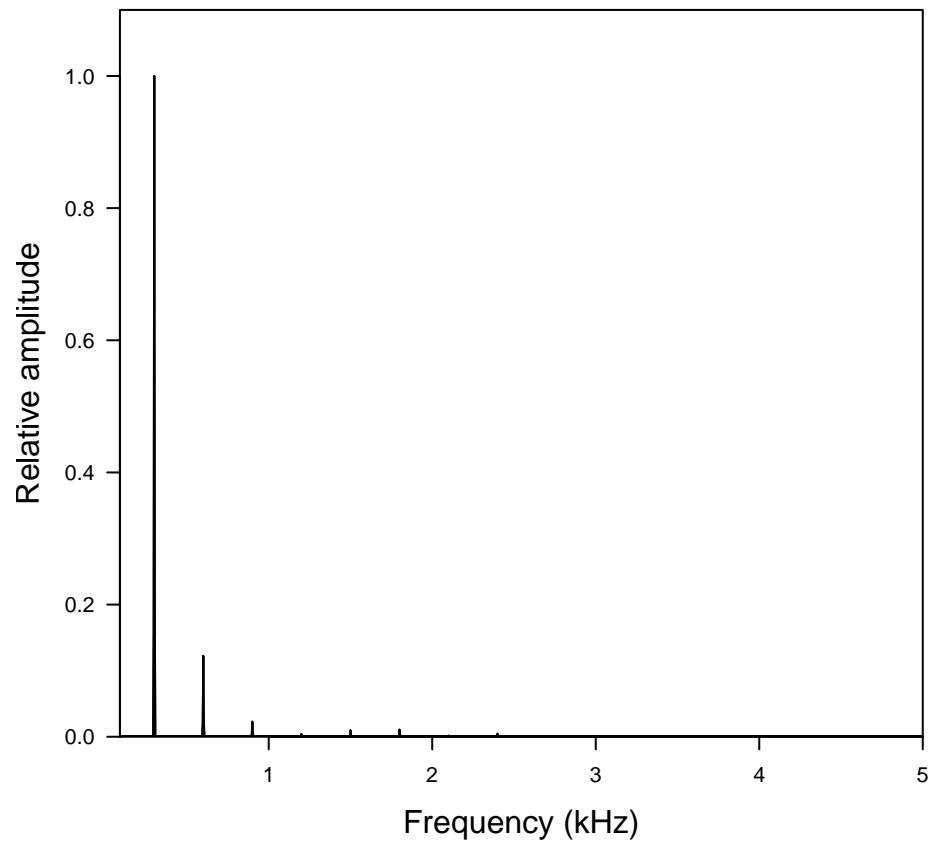

Vel. = 0.028 ; Str. = Receptacle ; Axis = x ; Fl. accession = 10-s-81-1AB

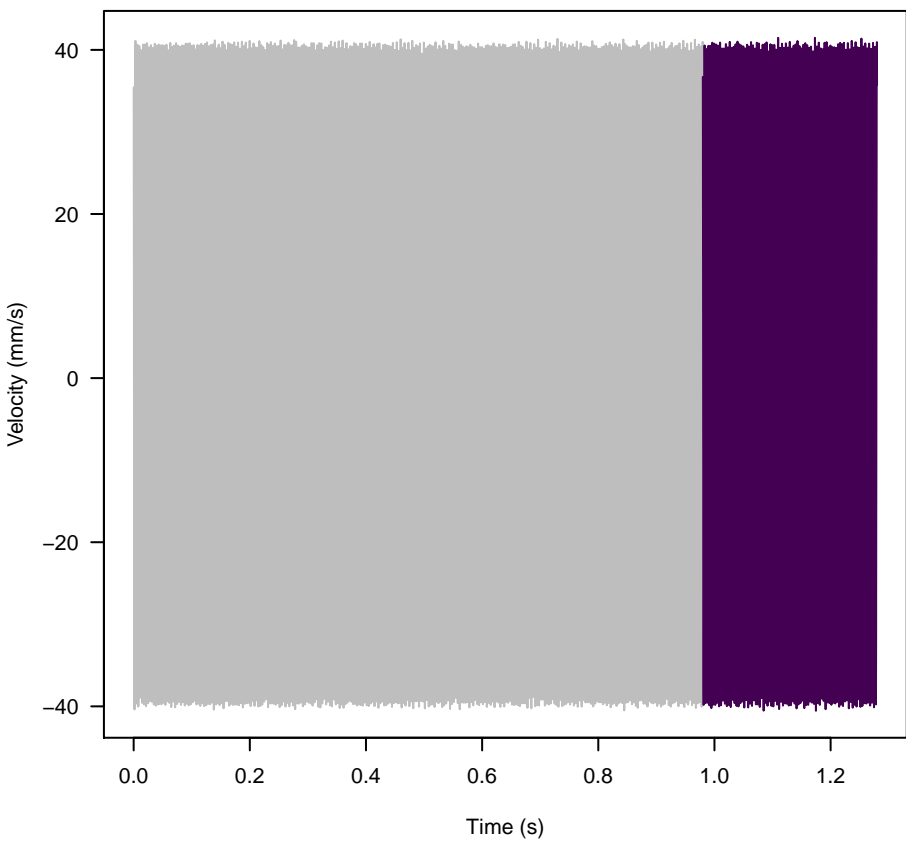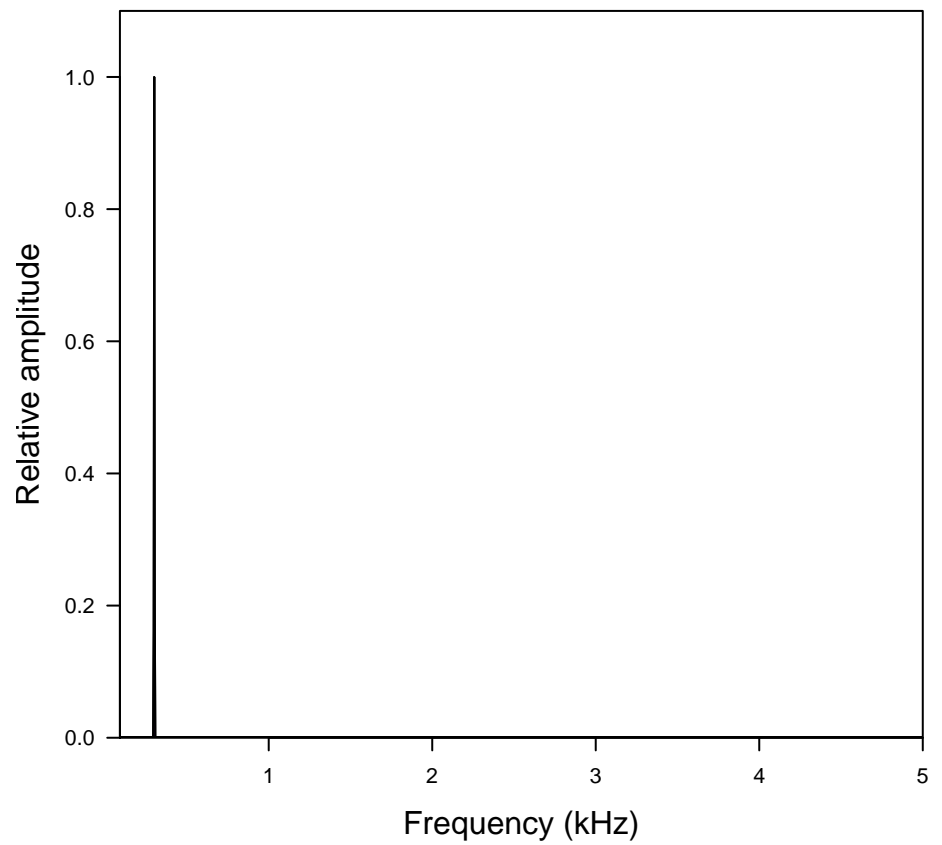

Vel. = 0.028 ; Str. = FA ; Axis = x ; Fl. accession = 10-s-81-1AB

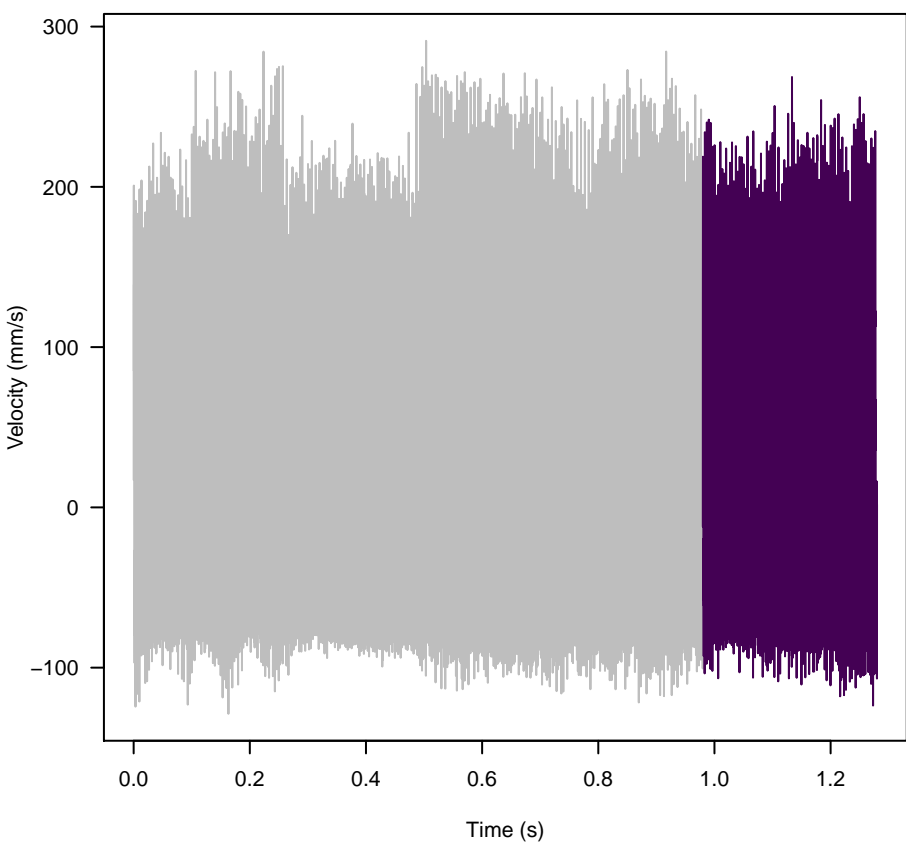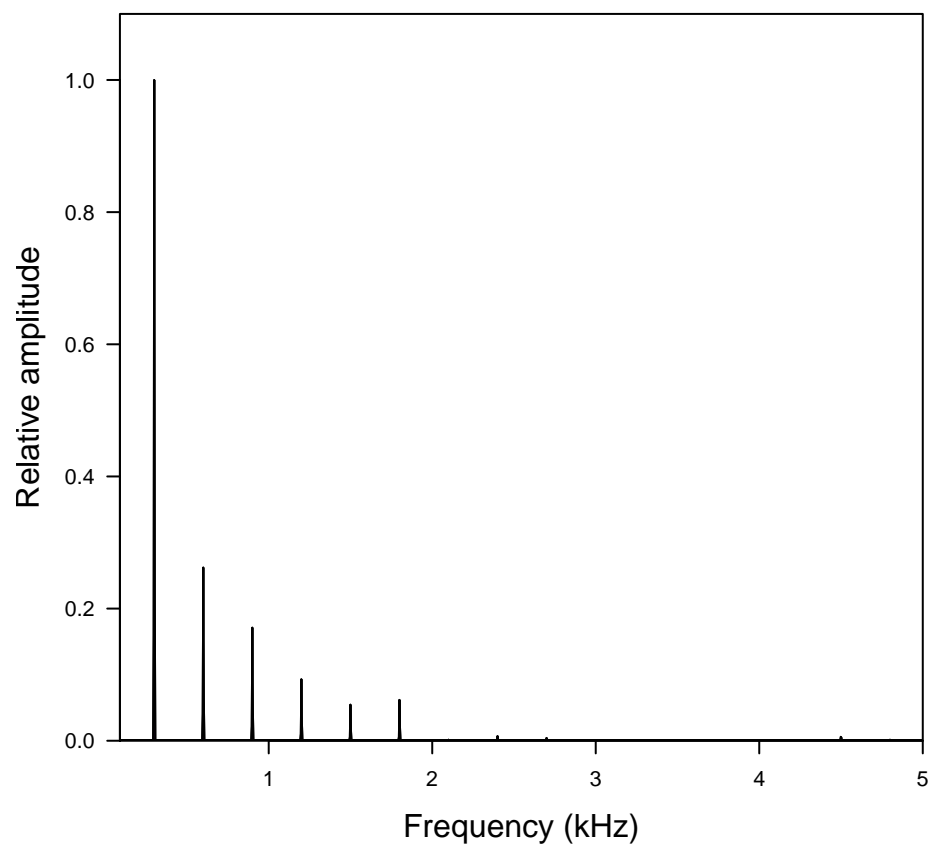

Vel. = 0.028 ; Str. = Receptacle ; Axis = x ; Fl. accession = 10-s-81-1AB

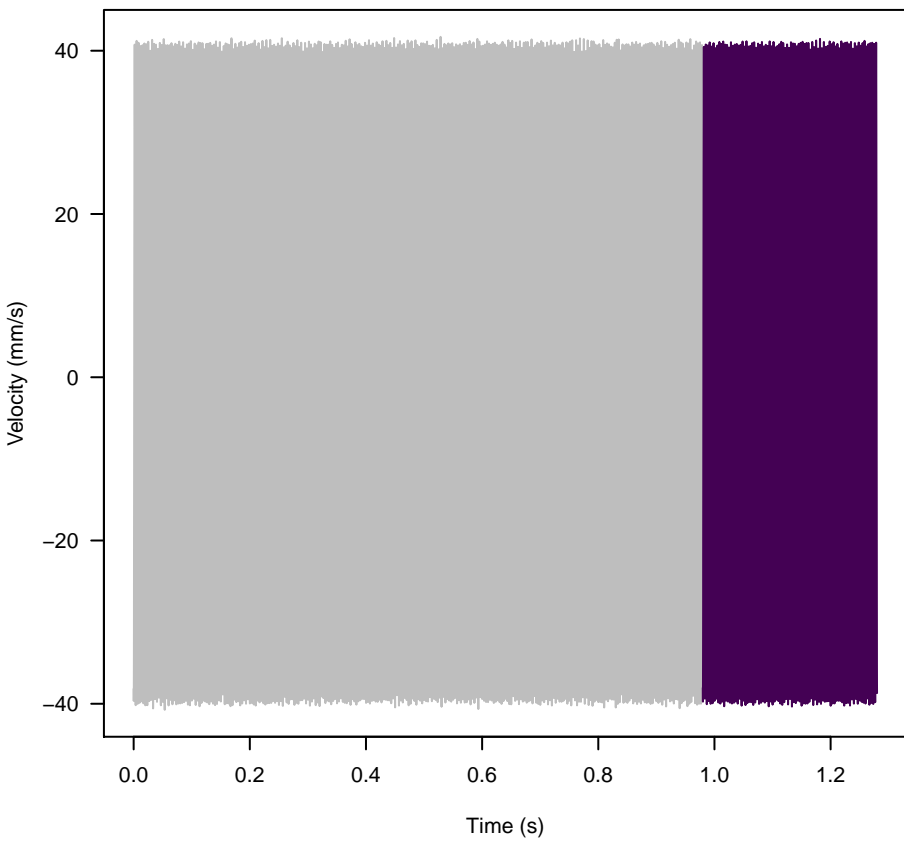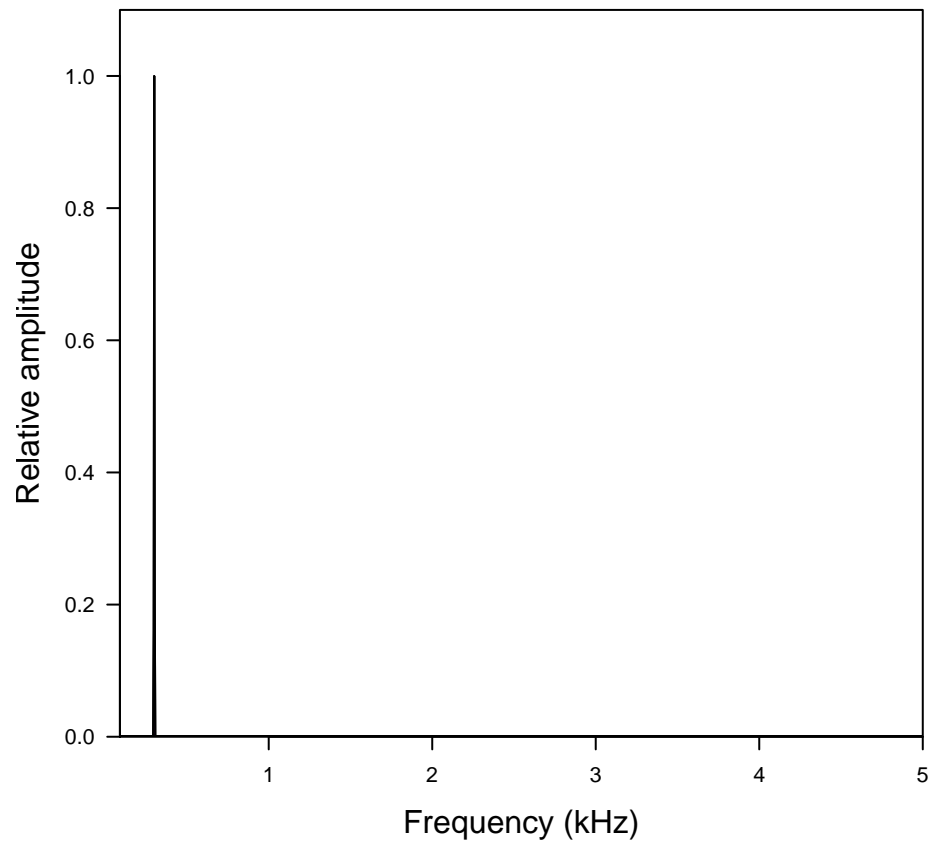

Vel. = 0.028 ; Str. = Corolla ; Axis = x ; Fl. accession = 10-s-81-1AB

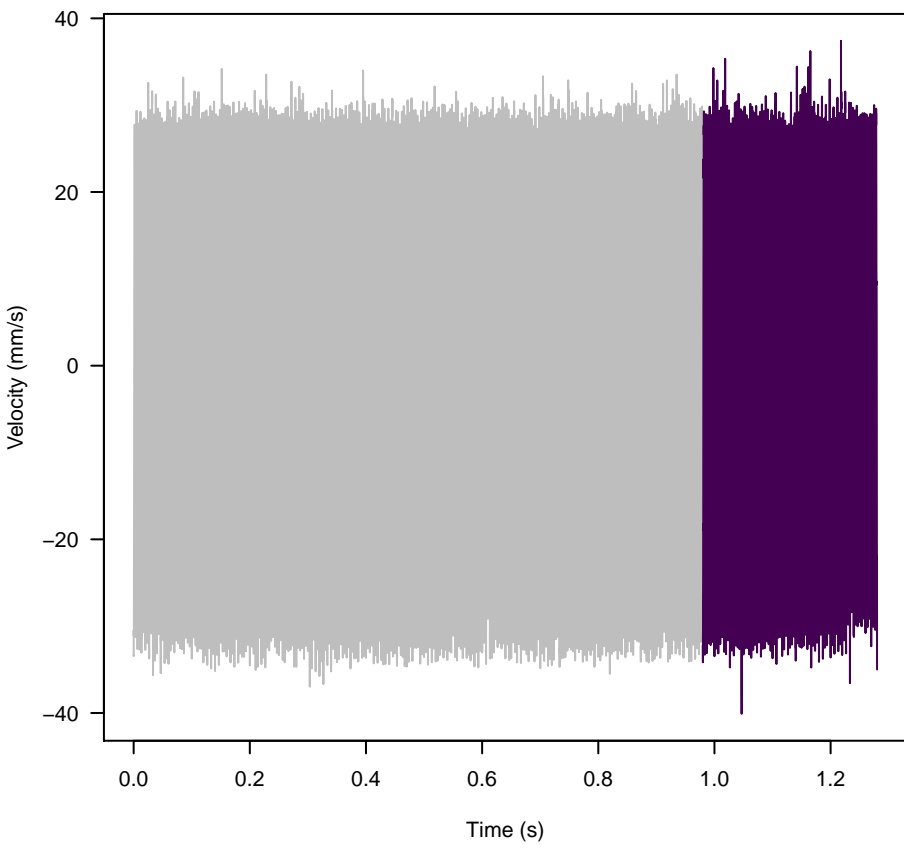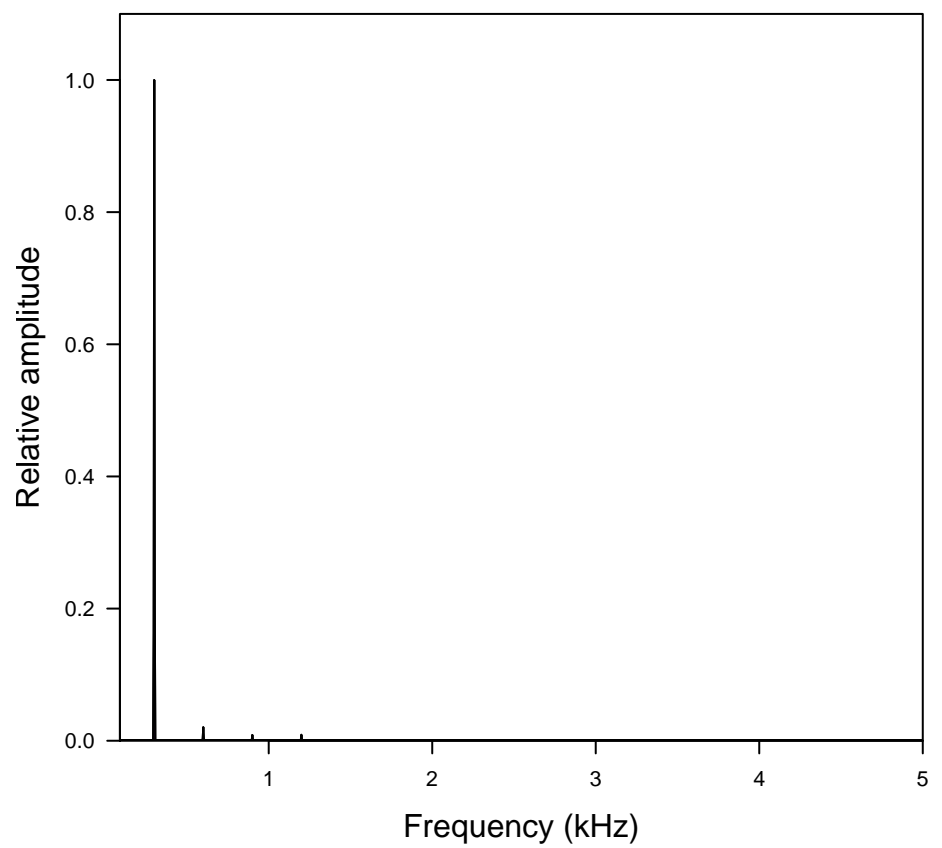

Vel. = 0.028 ; Str. = Receptacle ; Axis = x ; Fl. accession = 10-s-81-1AB

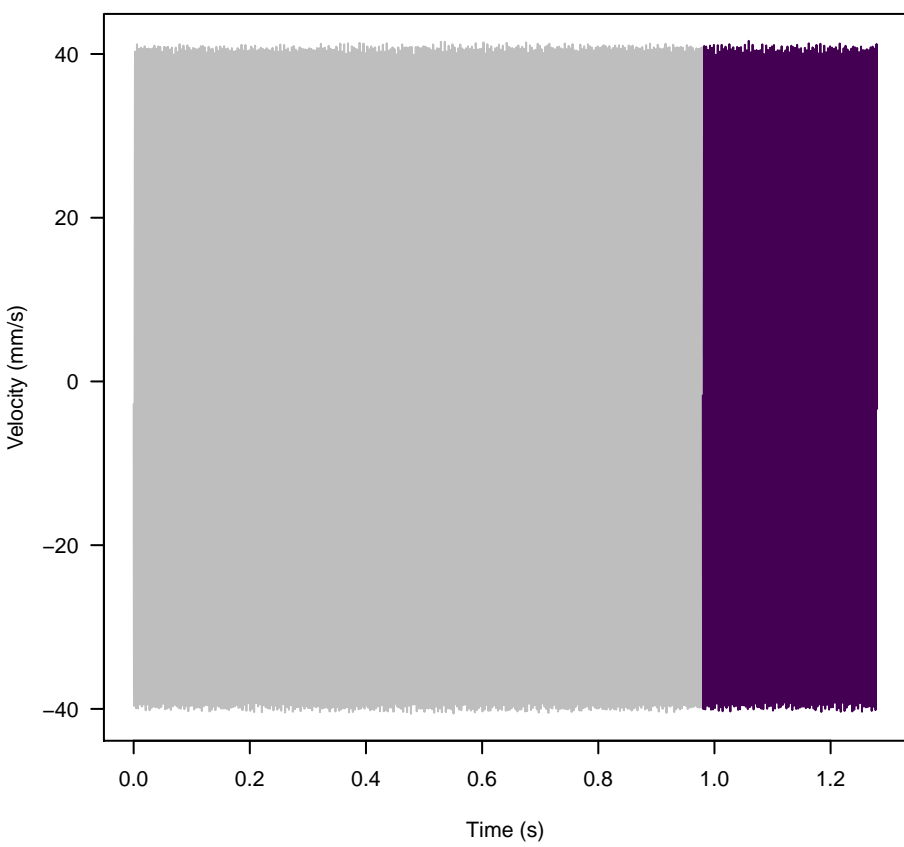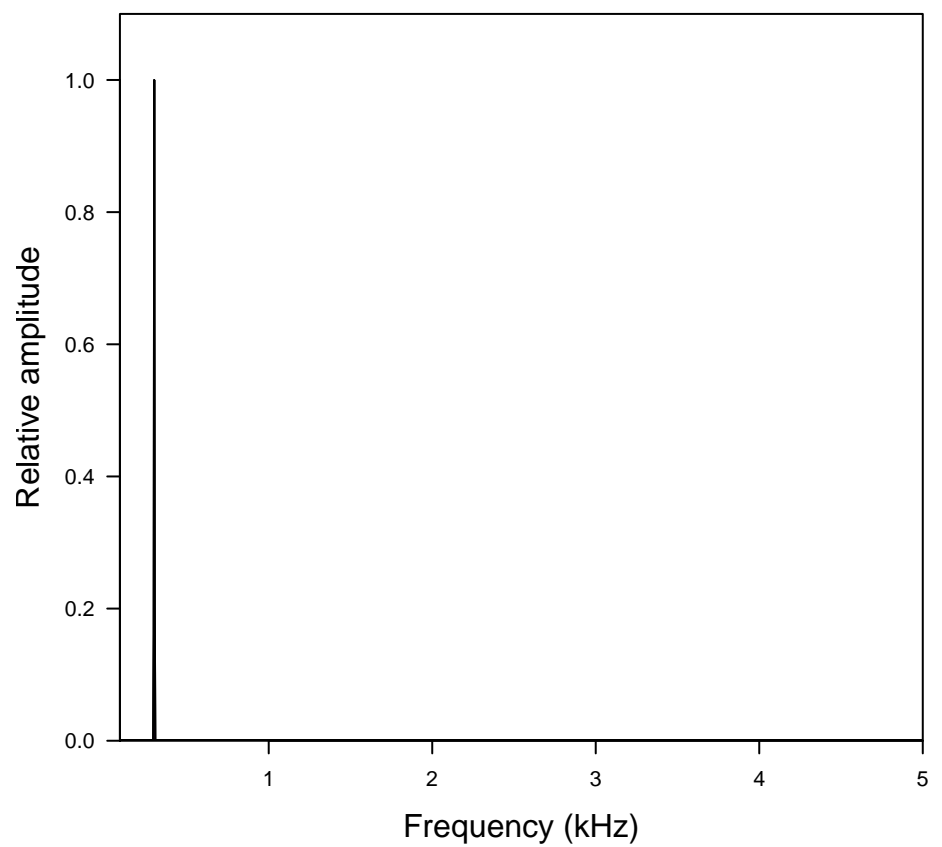

Vel. = 0.014 ; Str. = Corolla ; Axis = x ; Fl. accession = 10-s-81-1AB

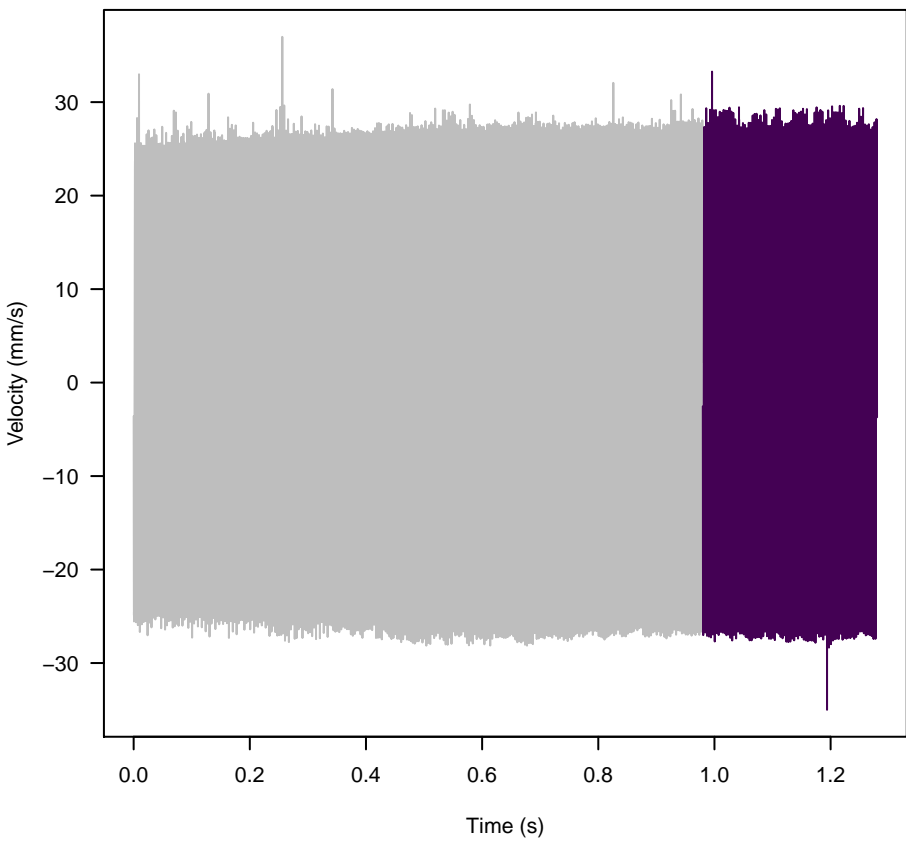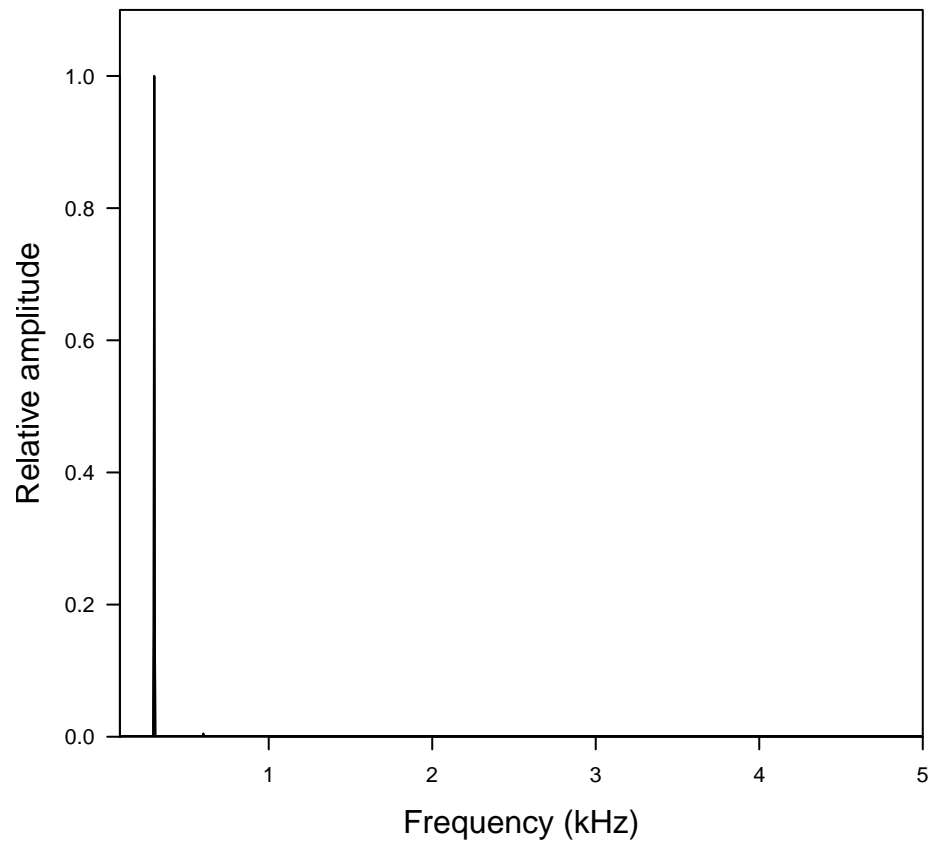

Vel. = 0.014 ; Str. = Receptacle ; Axis = x ; Fl. accession = 10-s-81-1AB

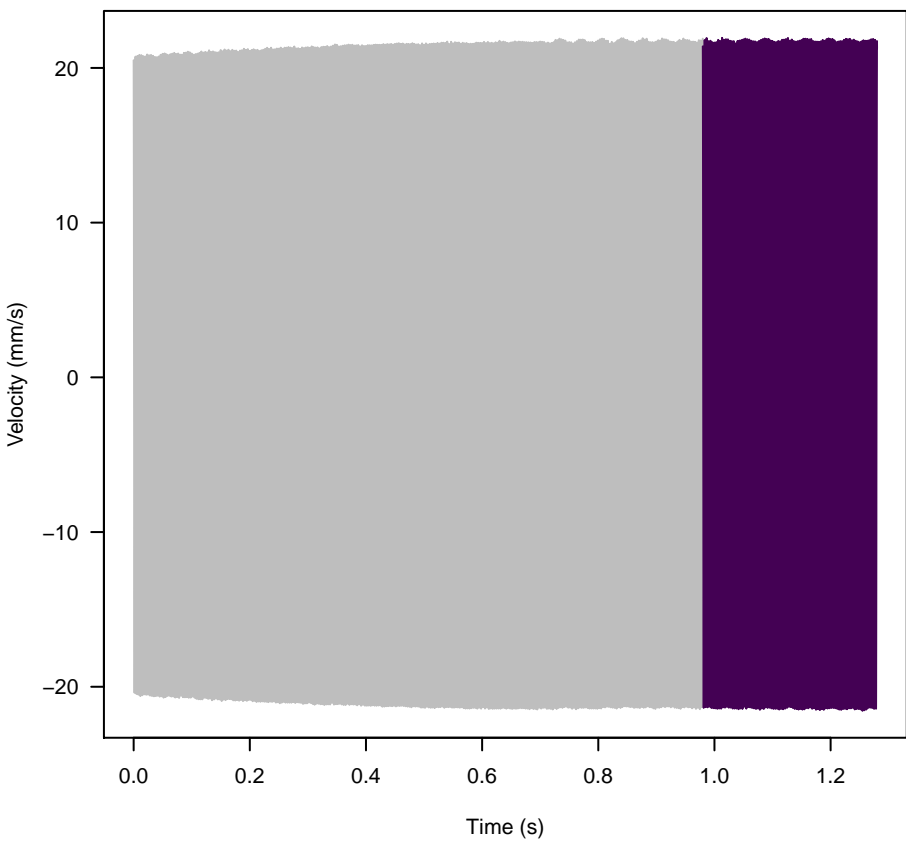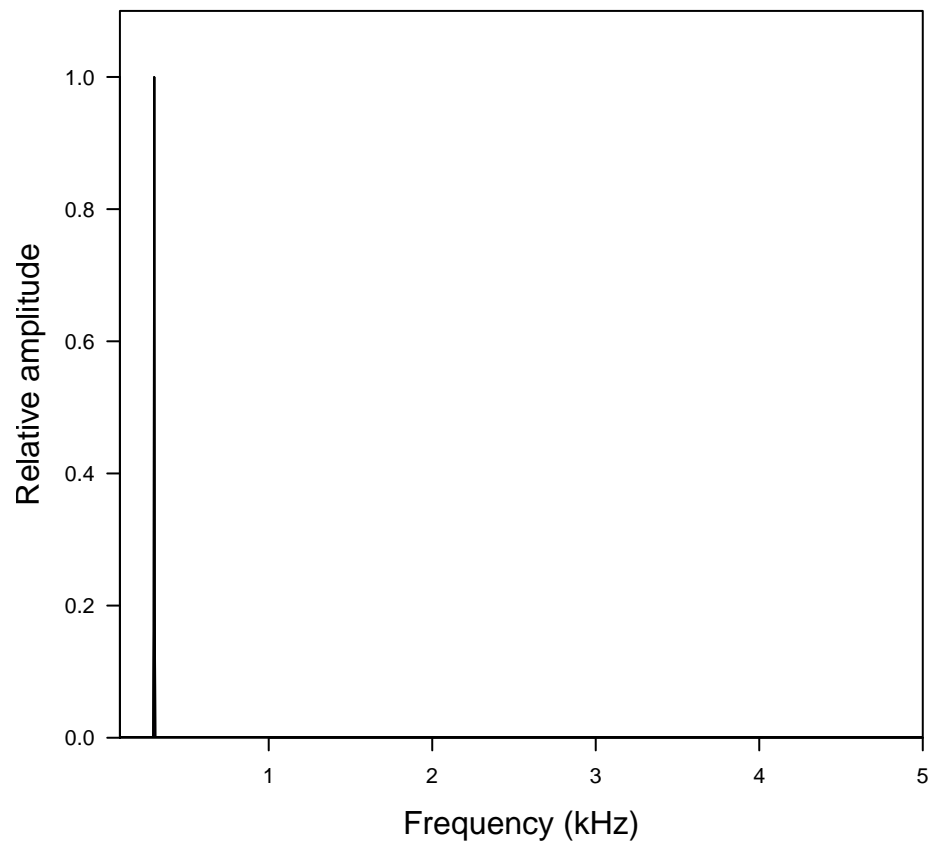

Vel. = 0.014 ; Str. = FA ; Axis = x ; Fl. accession = 10-s-81-1AB

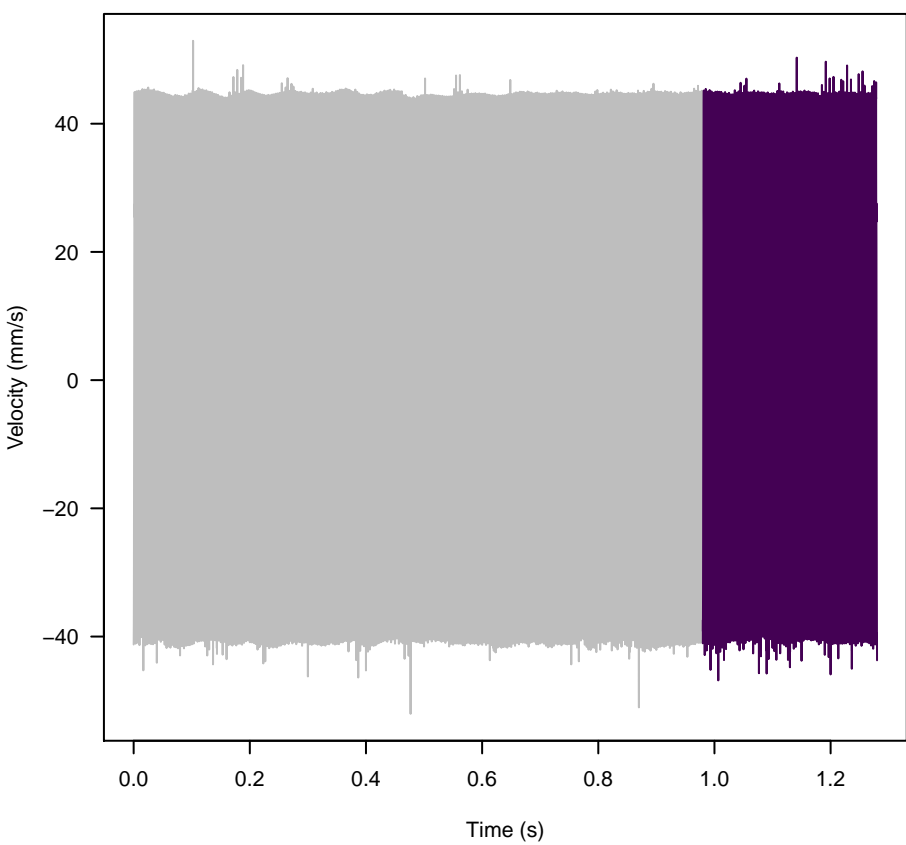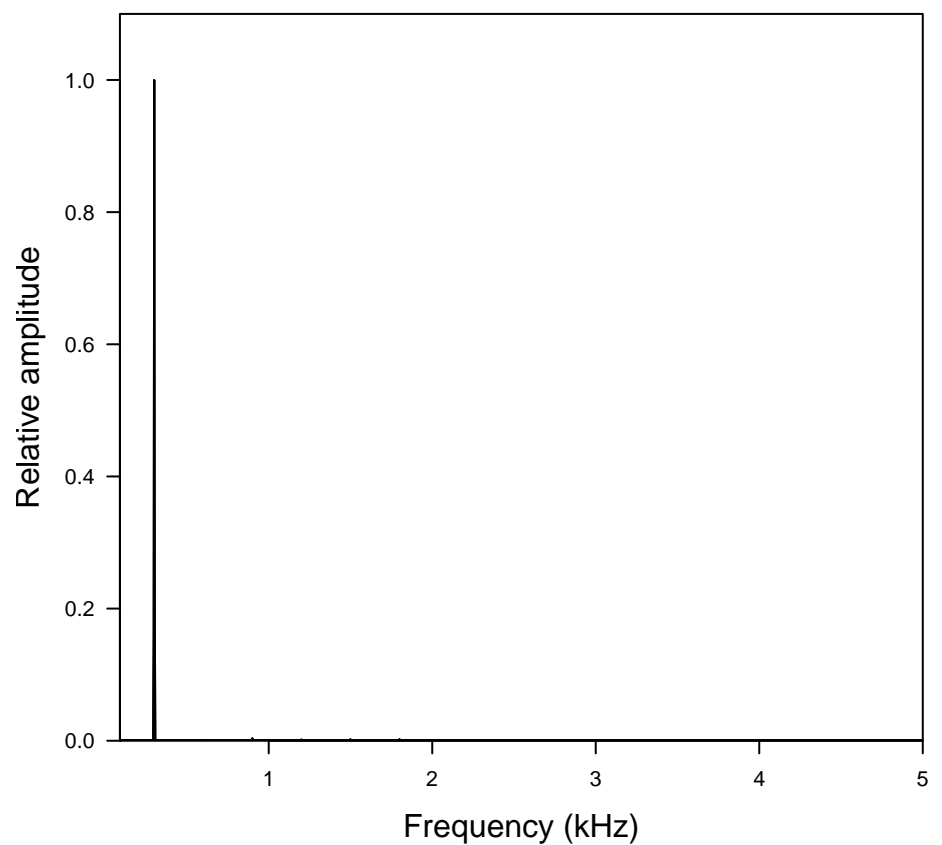

Vel. = 0.014 ; Str. = Receptacle ; Axis = x ; Fl. accession = 10-s-81-1AB

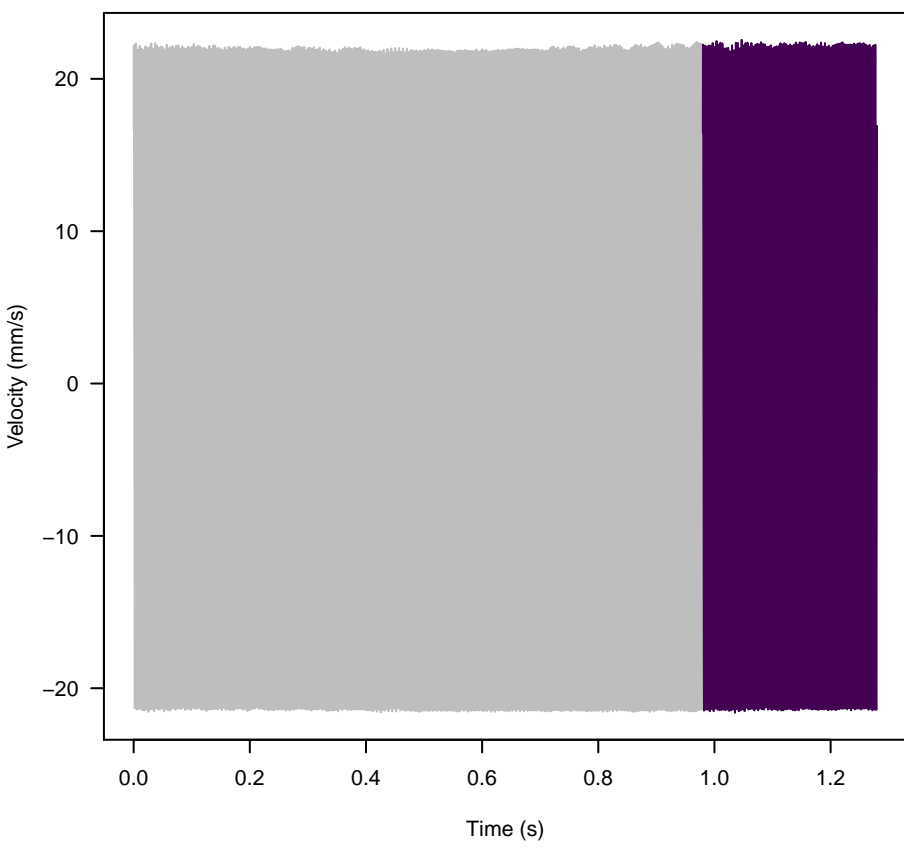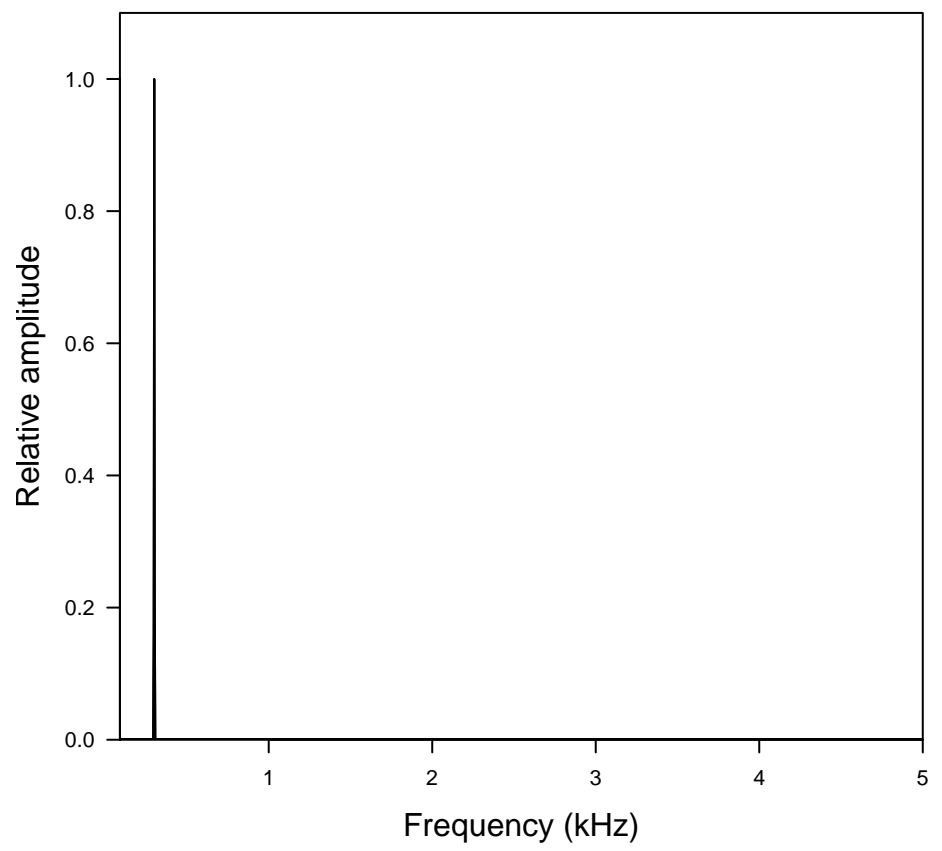

Vel. = 0.014 ; Str. = PA ; Axis = x ; Fl. accession = 10-s-81-1AB

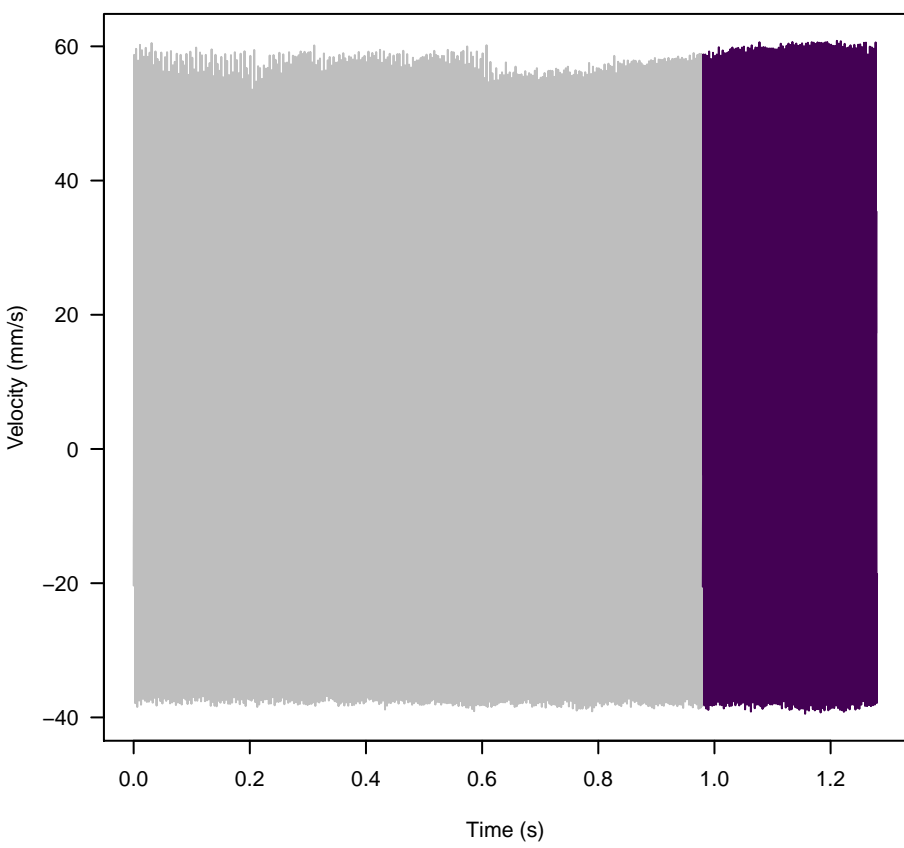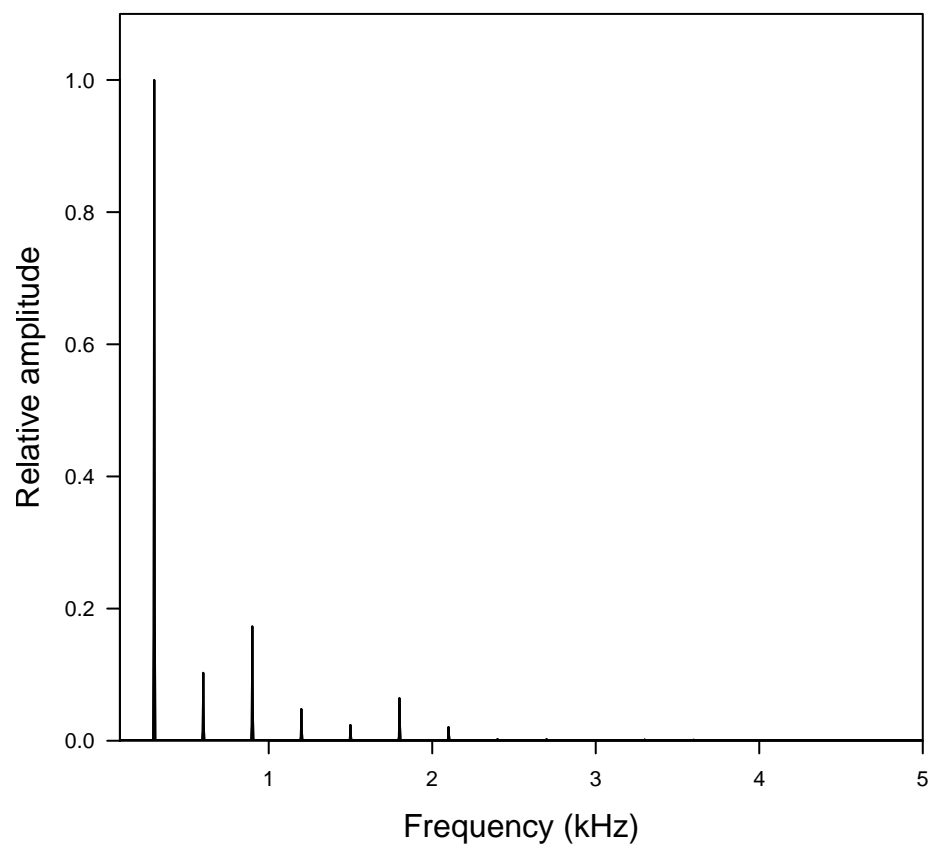

Vel. = 0.014 ; Str. = Receptacle ; Axis = x ; Fl. accession = 10-s-81-1AB

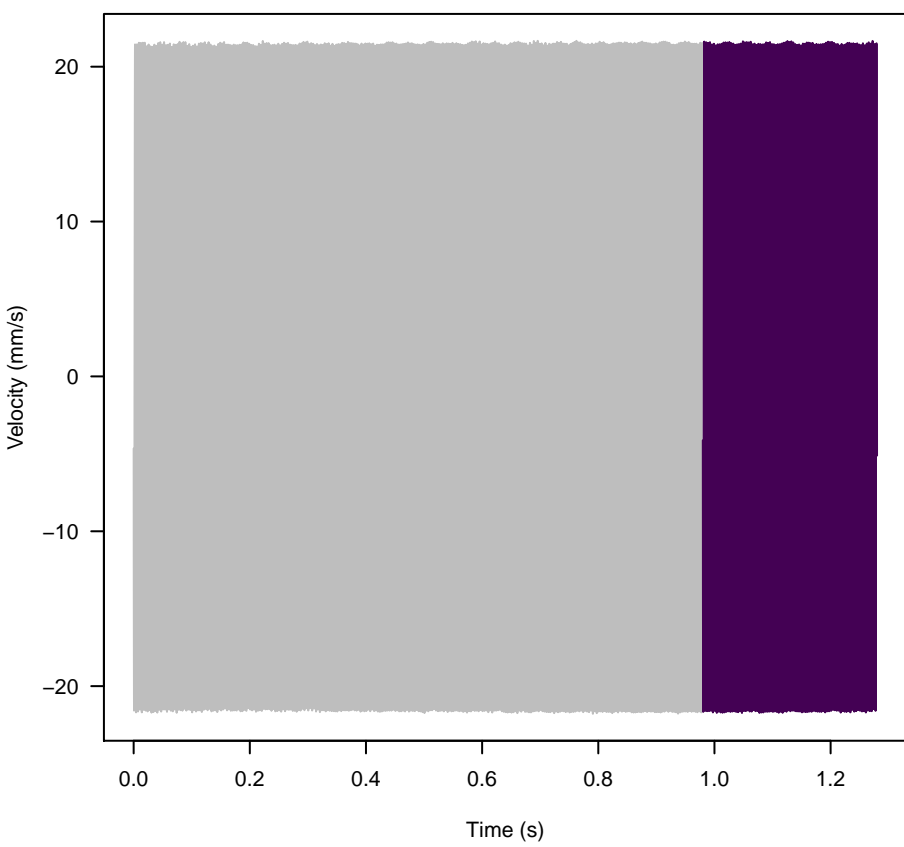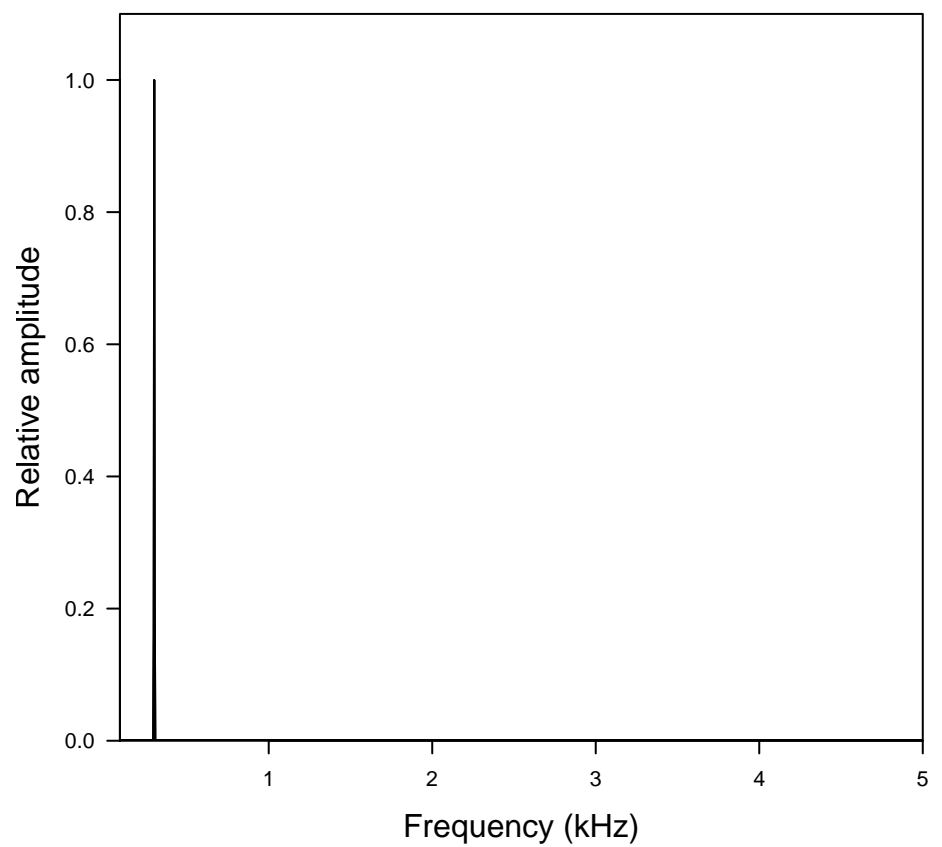

Vel. = 0.014 ; Str. = Corolla ; Axis = x ; Fl. accession = 10-s-81-8

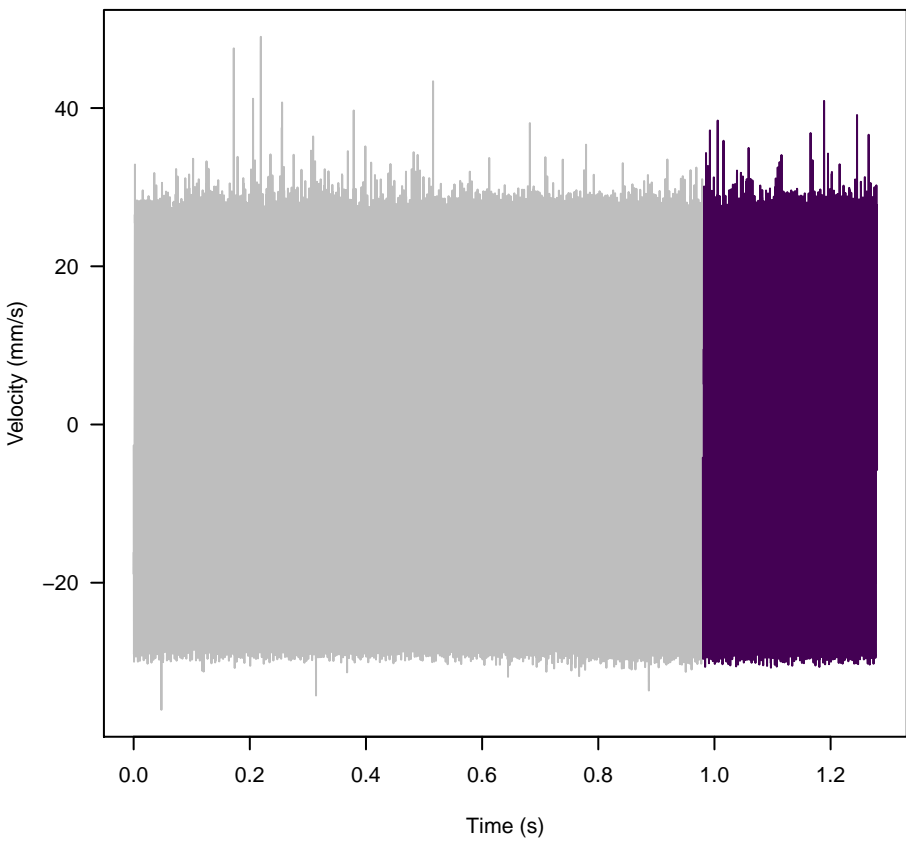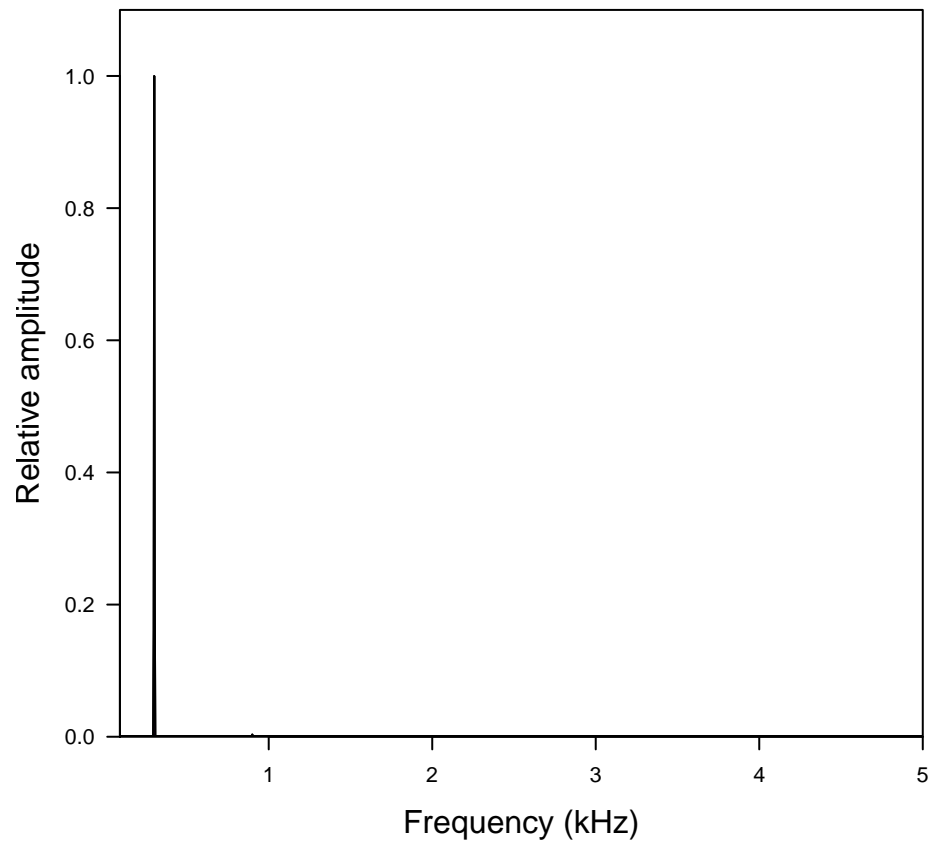

Vel. = 0.014 ; Str. = Receptacle ; Axis = x ; Fl. accession = 10-s-81-8

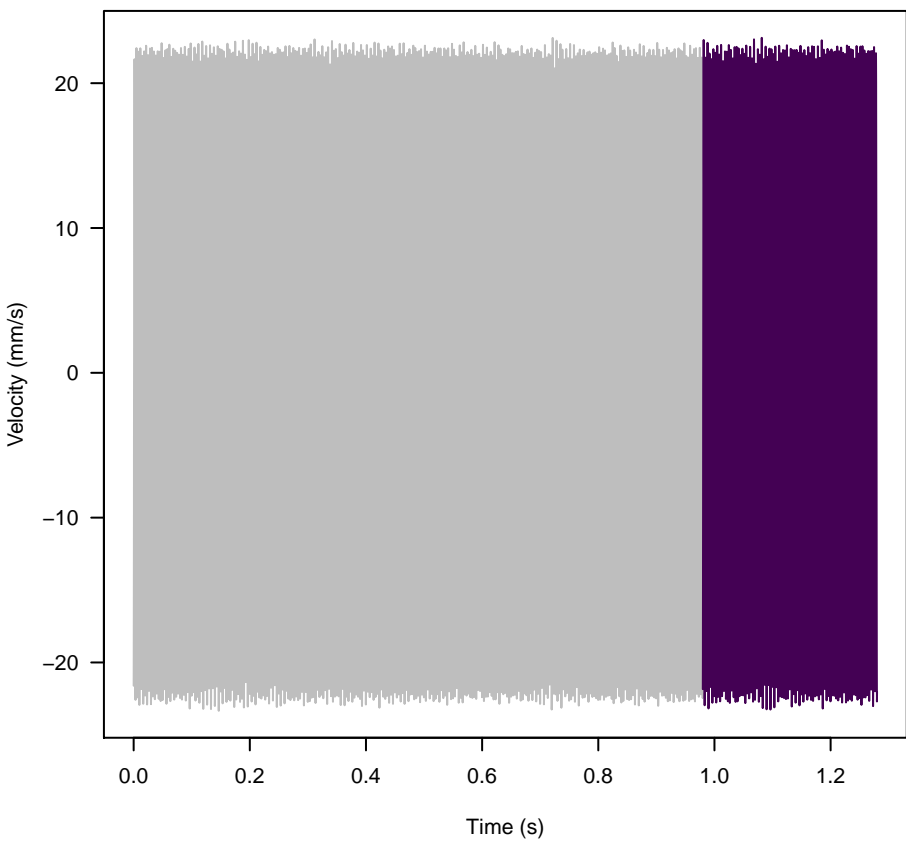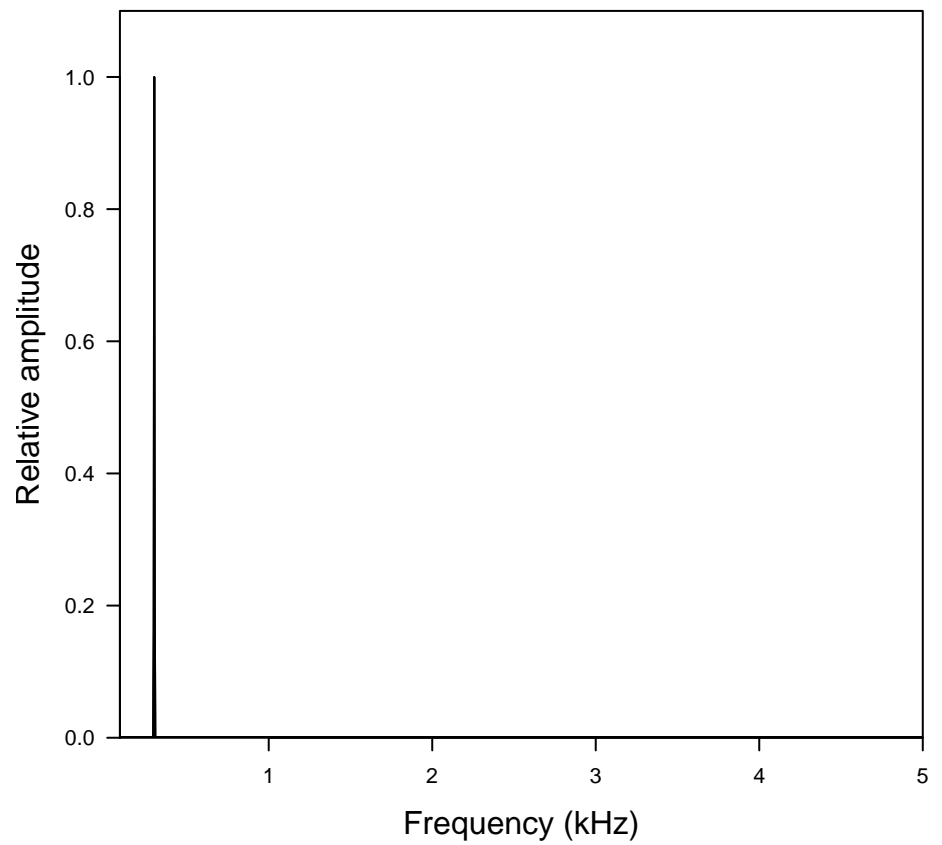

Vel. = 0.014 ; Str. = FA ; Axis = x ; Fl. accession = 10-s-81-8

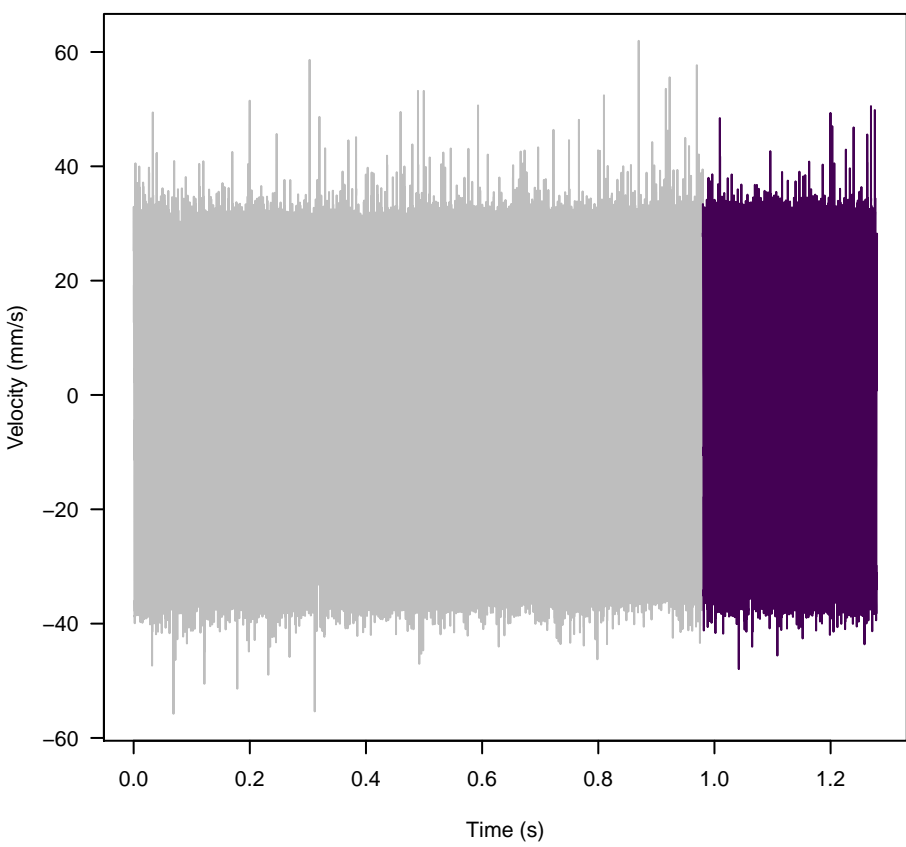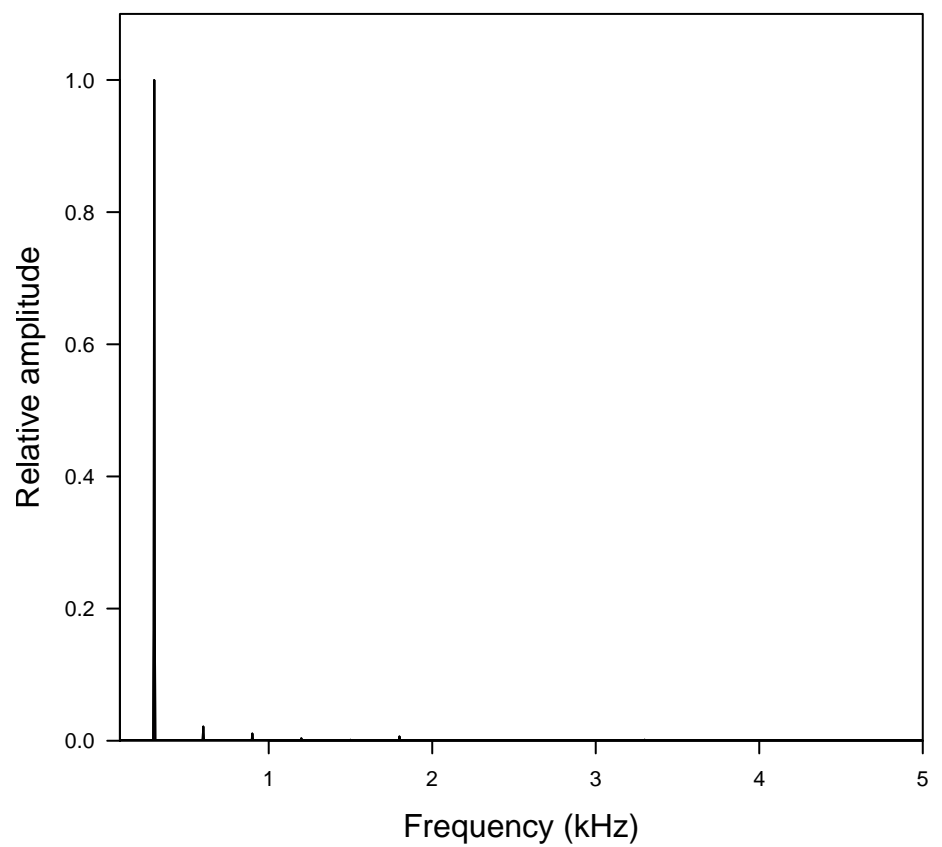

Vel. = 0.014 ; Str. = Receptacle ; Axis = x ; Fl. accession = 10-s-81-8

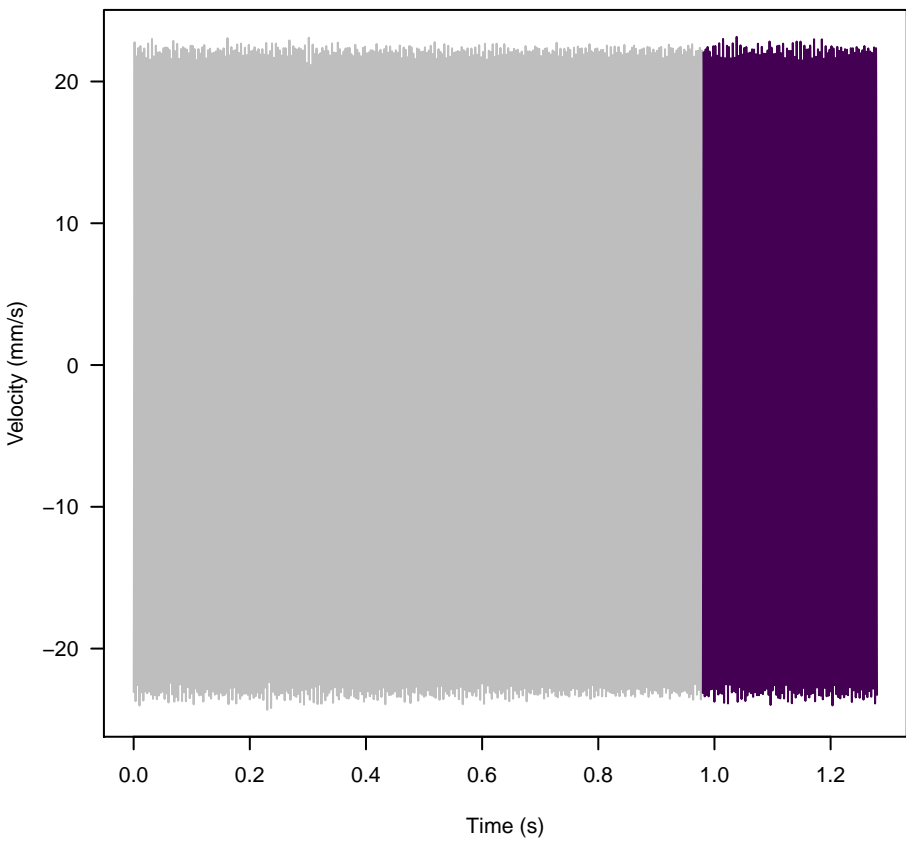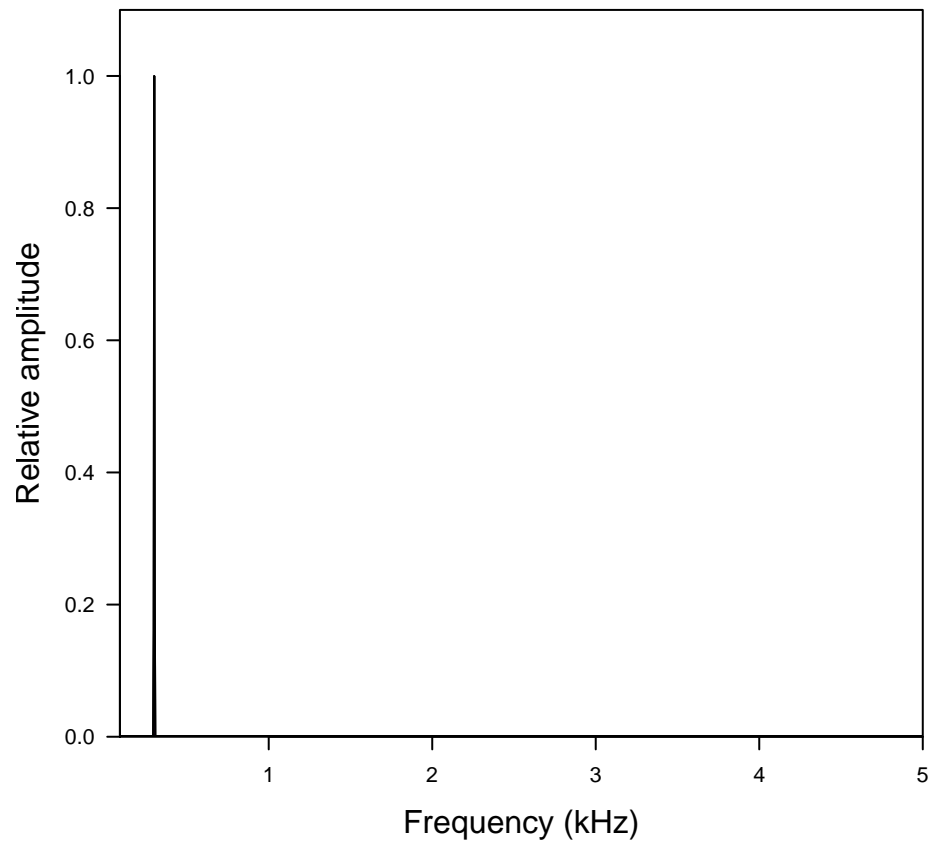

Vel. = 0.014 ; Str. = PA ; Axis = x ; Fl. accession = 10-s-81-8

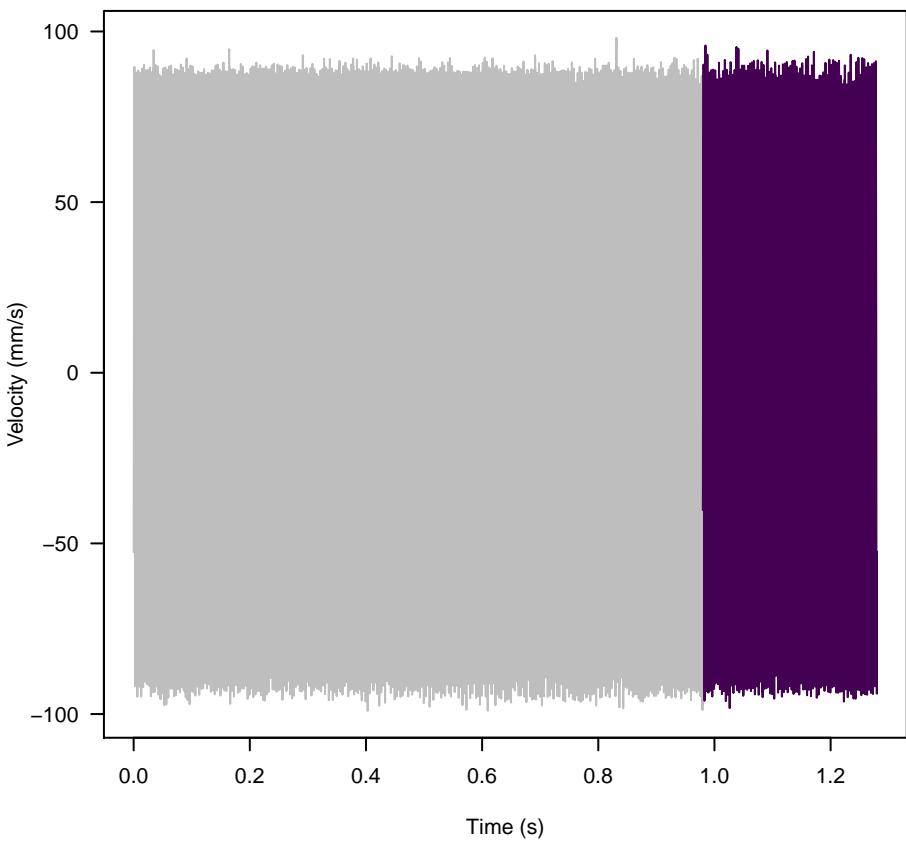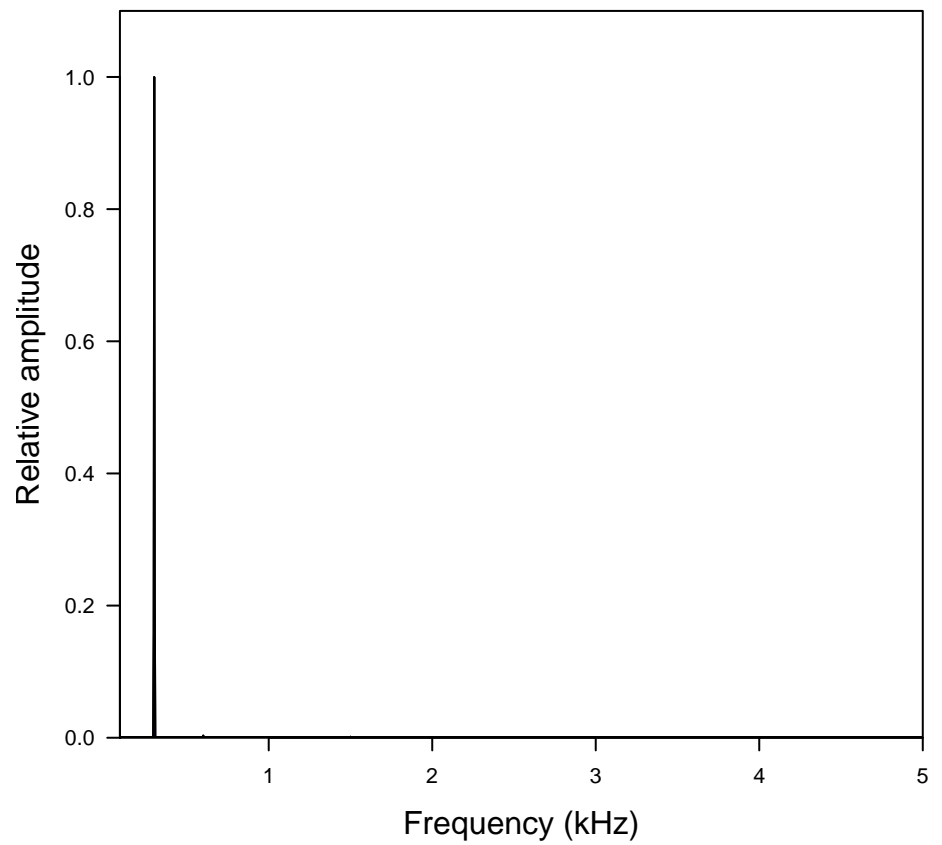

Vel. = 0.014 ; Str. = Receptacle ; Axis = x ; Fl. accession = 10-s-81-8

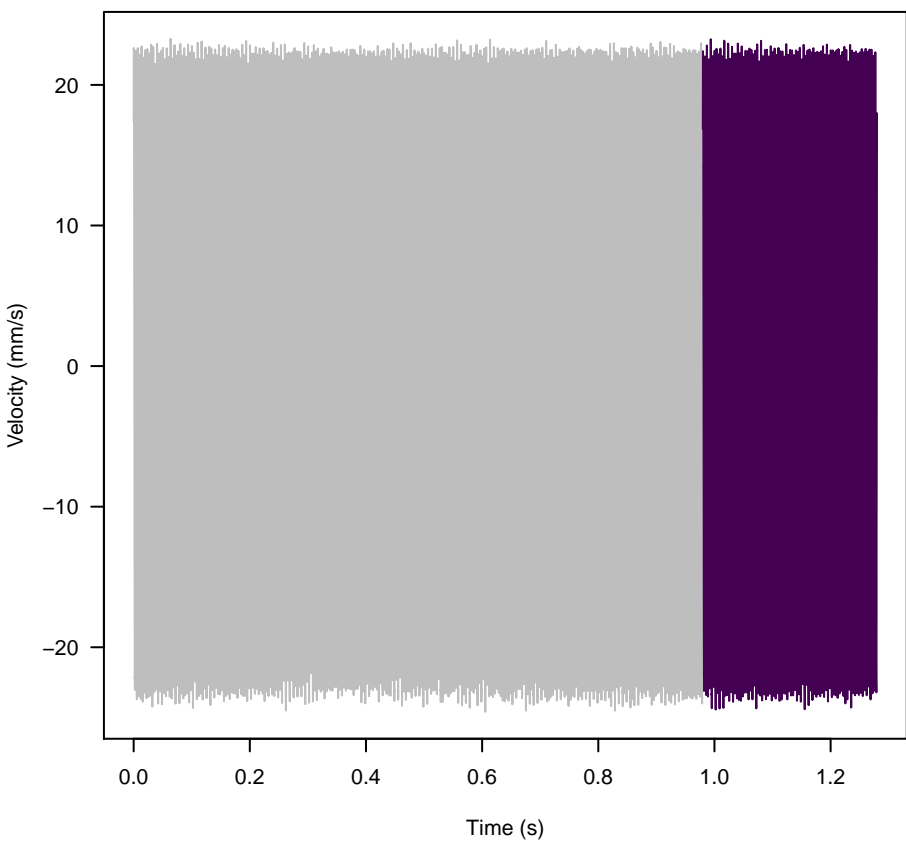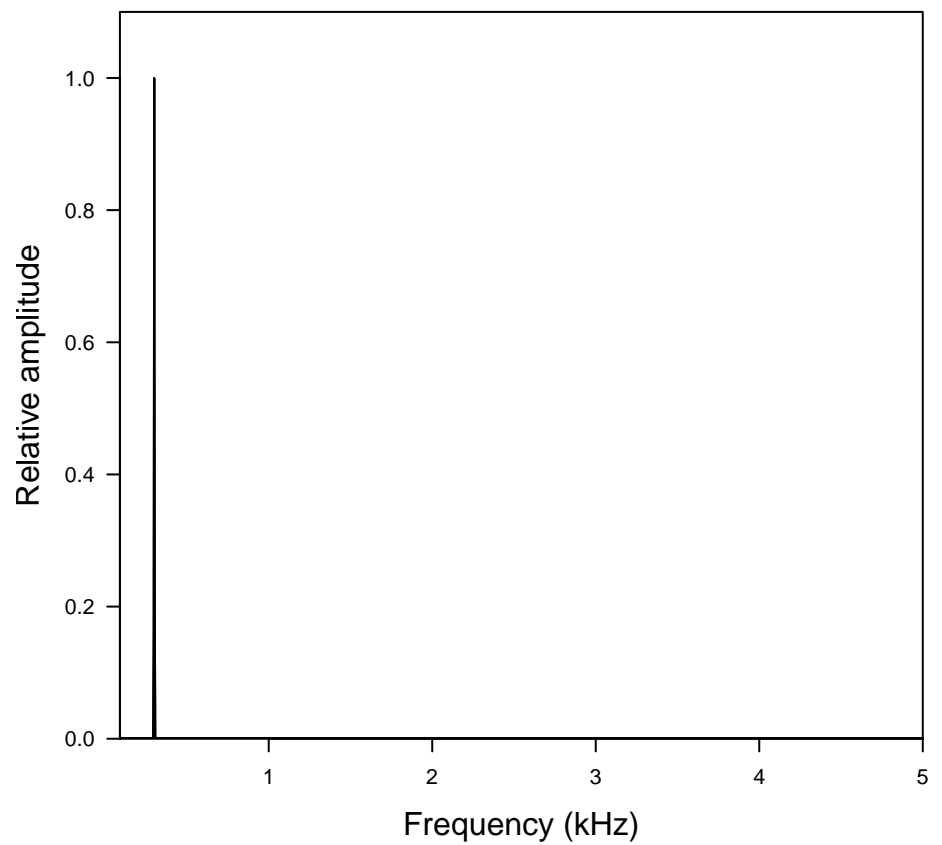

Vel. = 0.028 ; Str. = PA ; Axis = x ; Fl. accession = 10-s-81-8

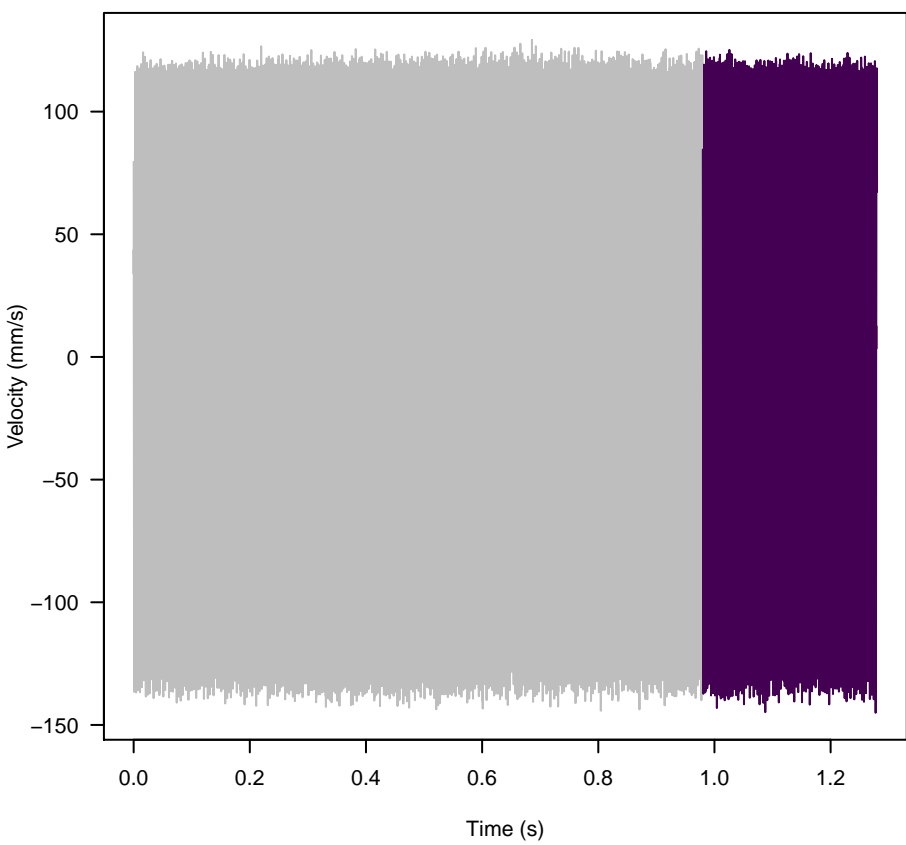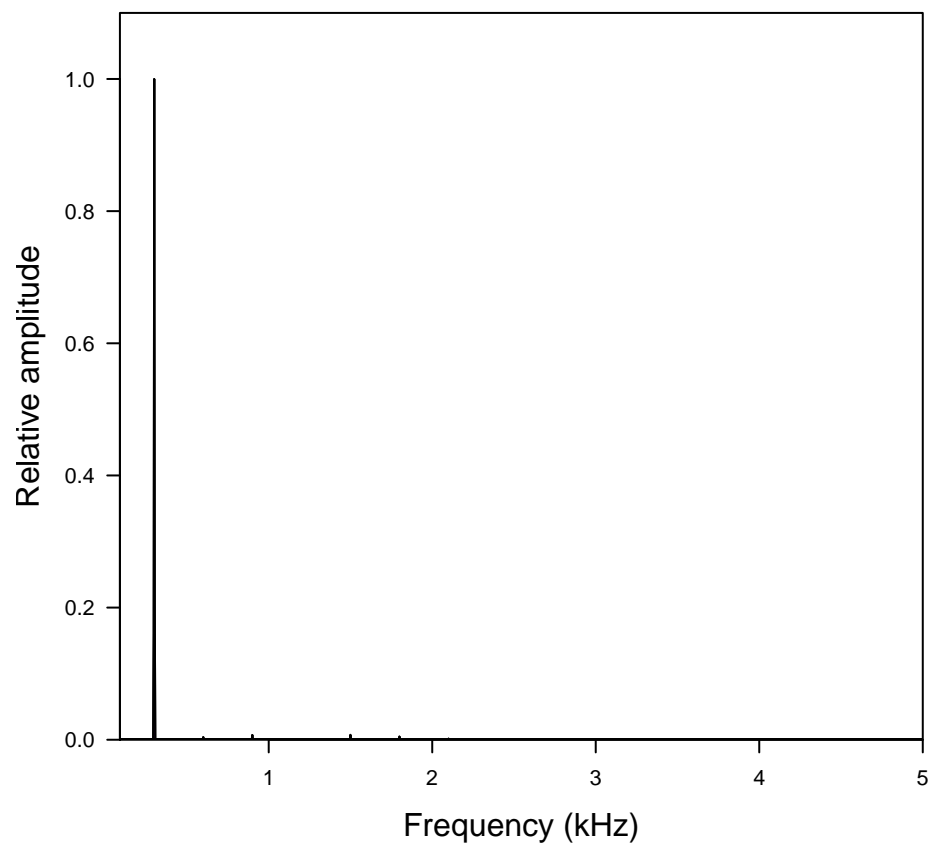

Vel. = 0.028 ; Str. = Receptacle ; Axis = x ; Fl. accession = 10-s-81-8

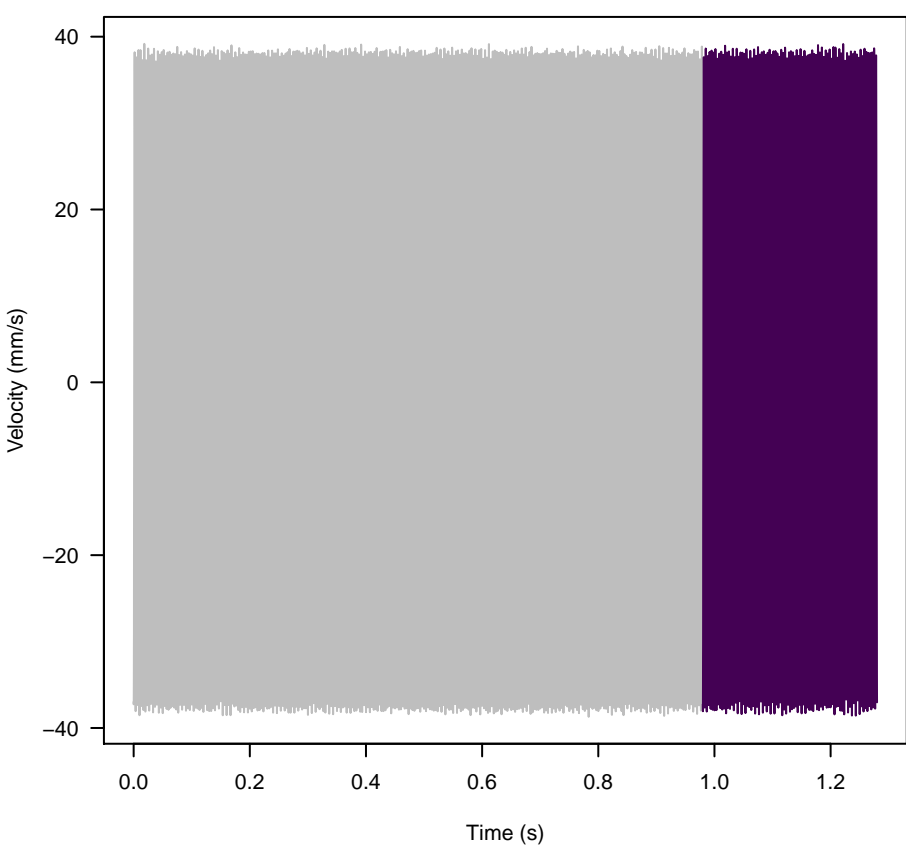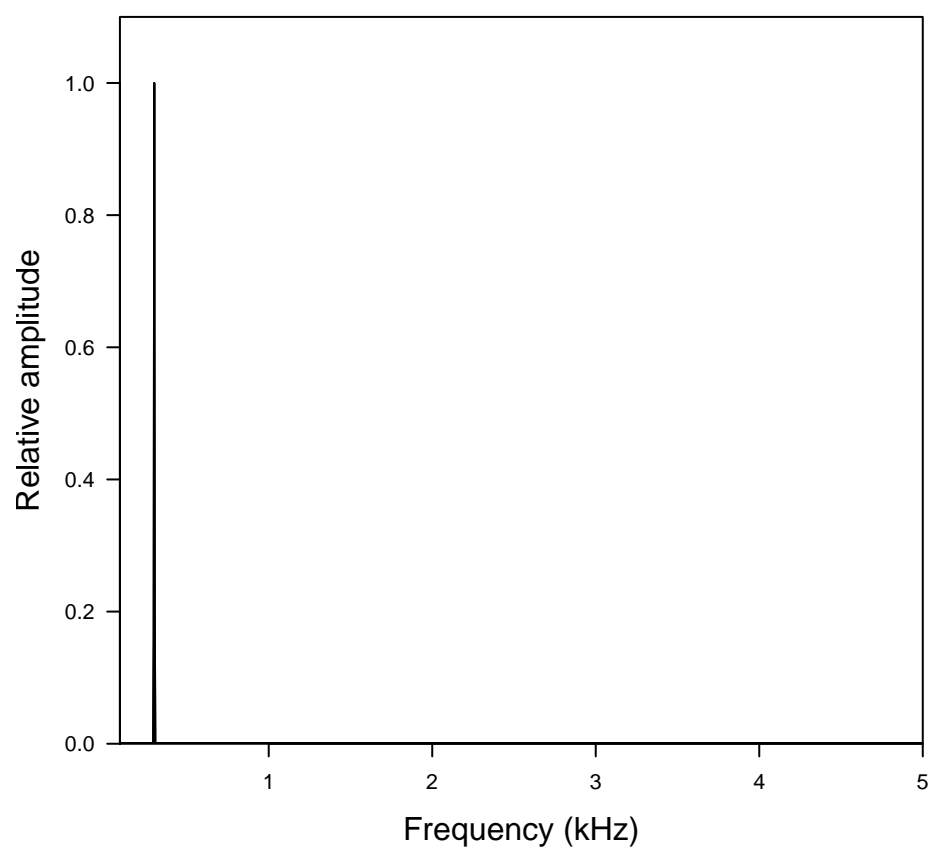

Vel. = 0.028 ; Str. = FA ; Axis = x ; Fl. accession = 10-s-81-8

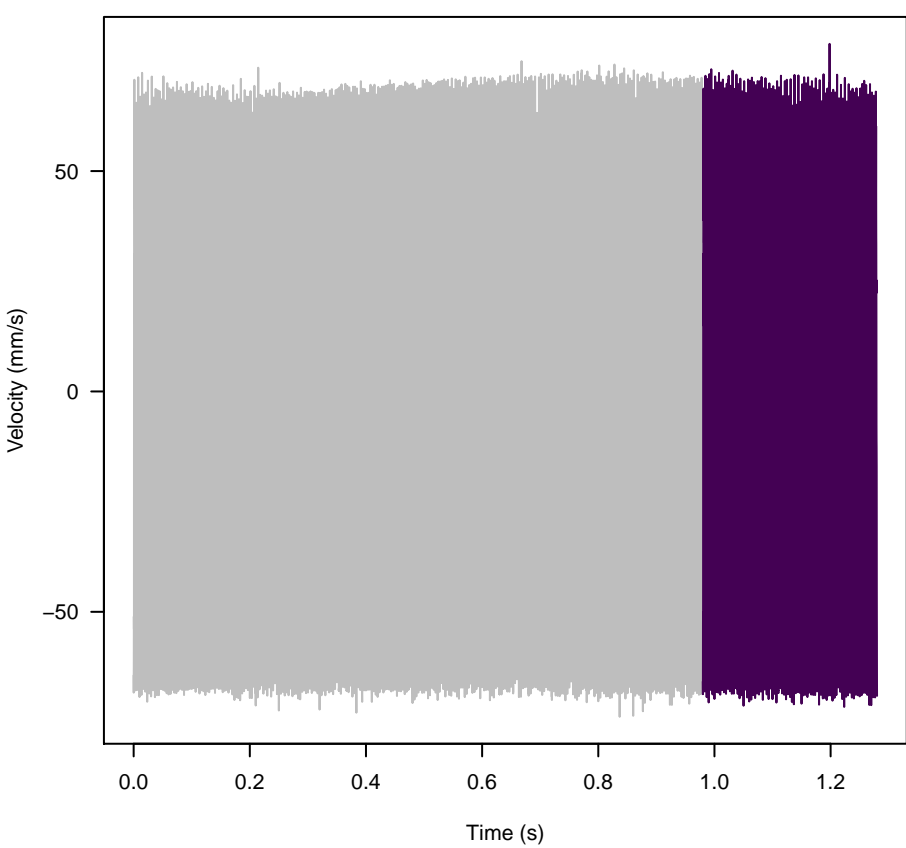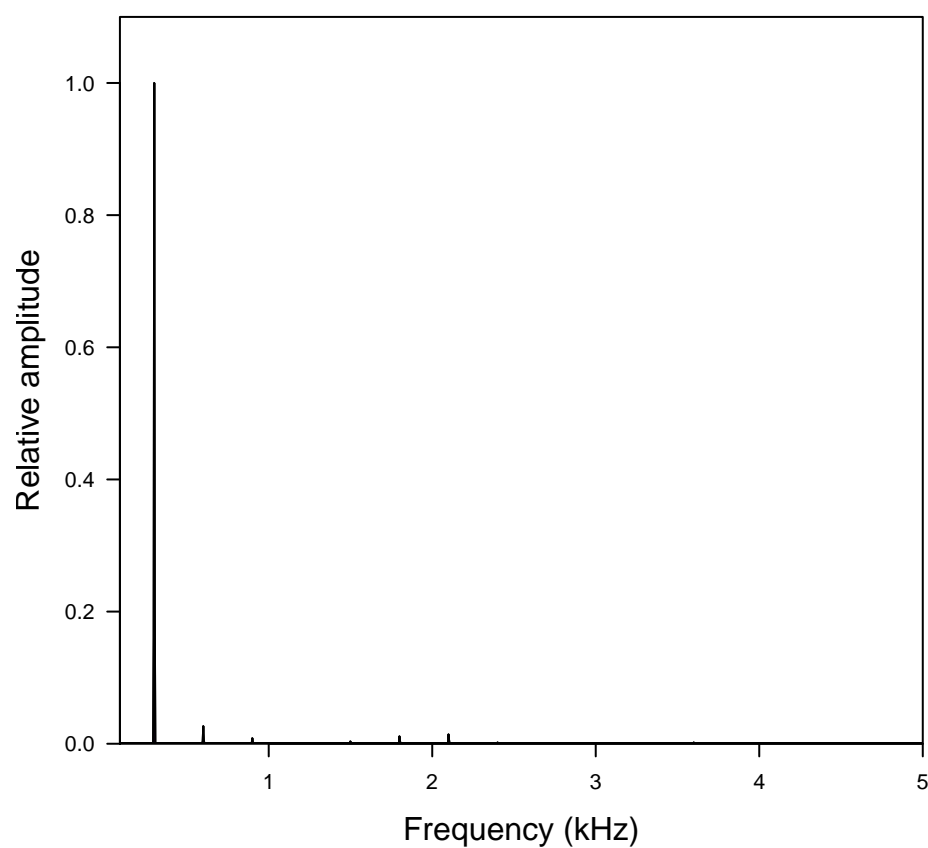

Vel. = 0.028 ; Str. = Receptacle ; Axis = x ; Fl. accession = 10-s-81-8

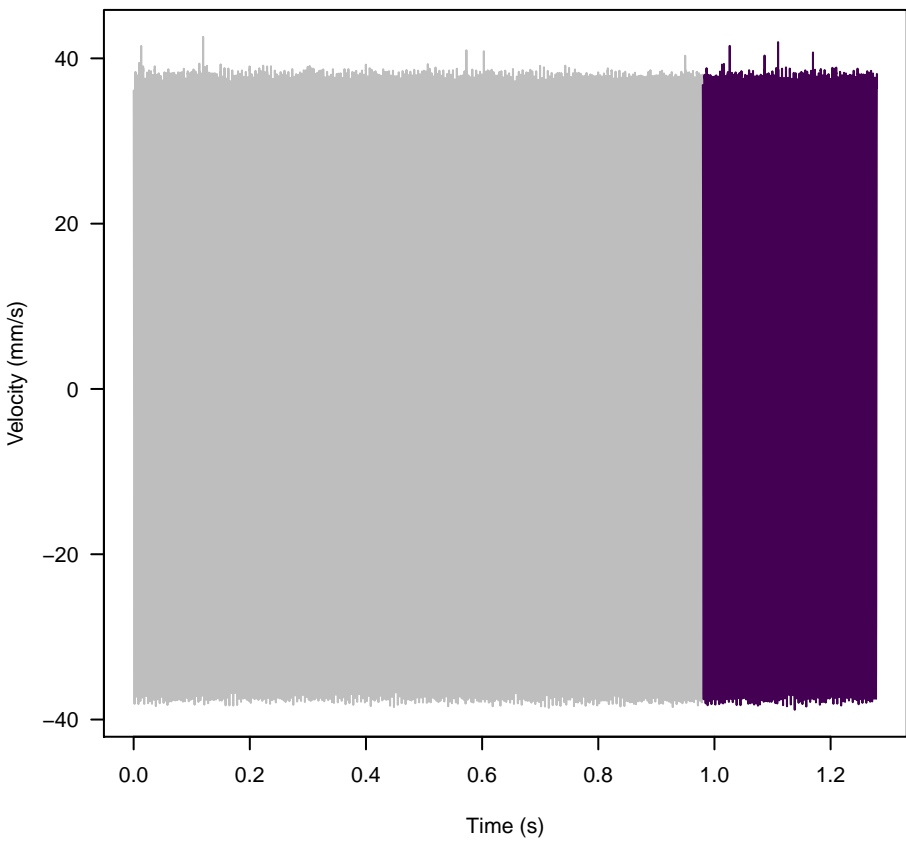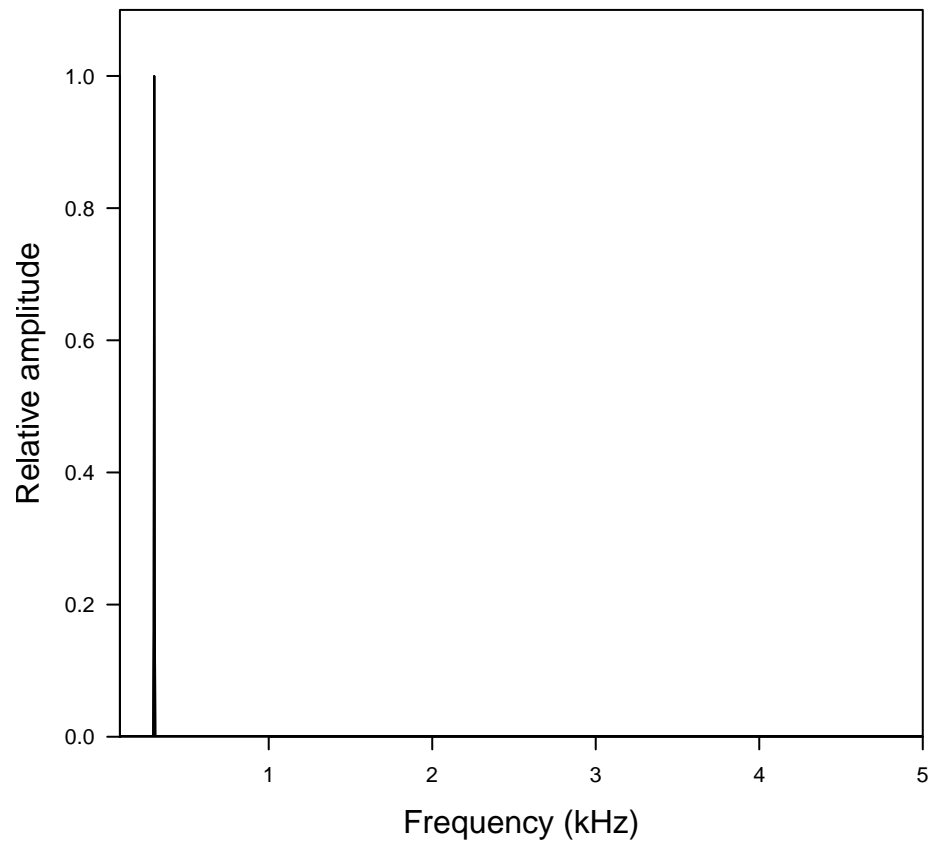

Vel. = 0.028 ; Str. = Corolla ; Axis = x ; Fl. accession = 10-s-81-8

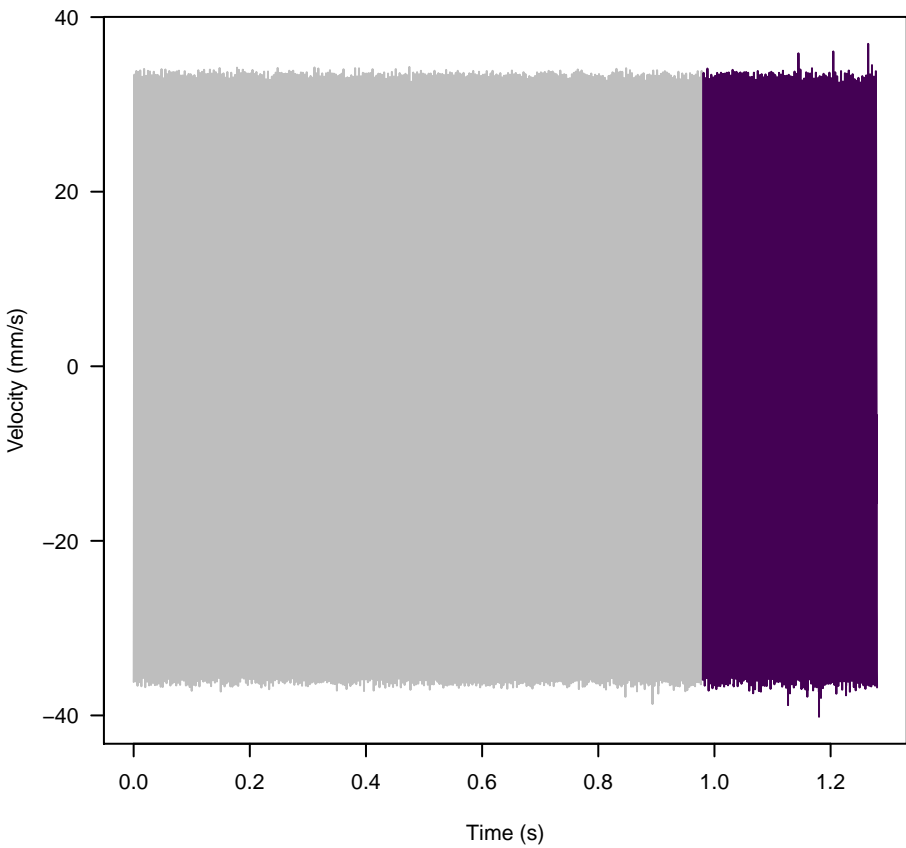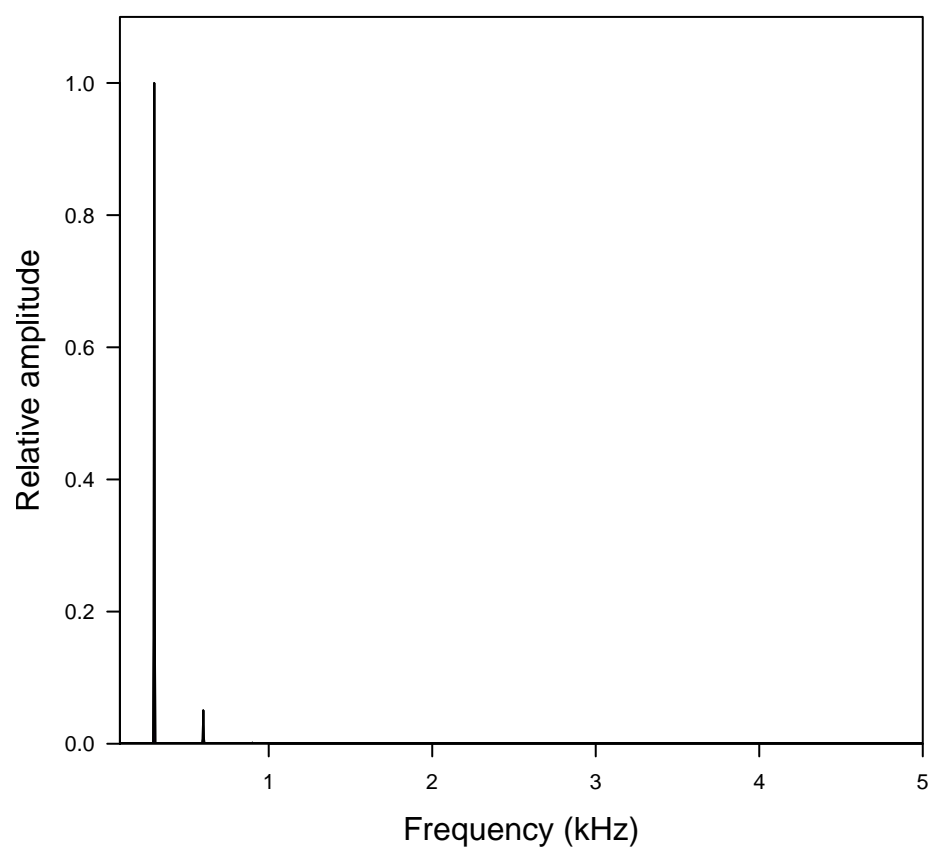

Vel. = 0.028 ; Str. = Receptacle ; Axis = x ; Fl. accession = 10-s-81-8

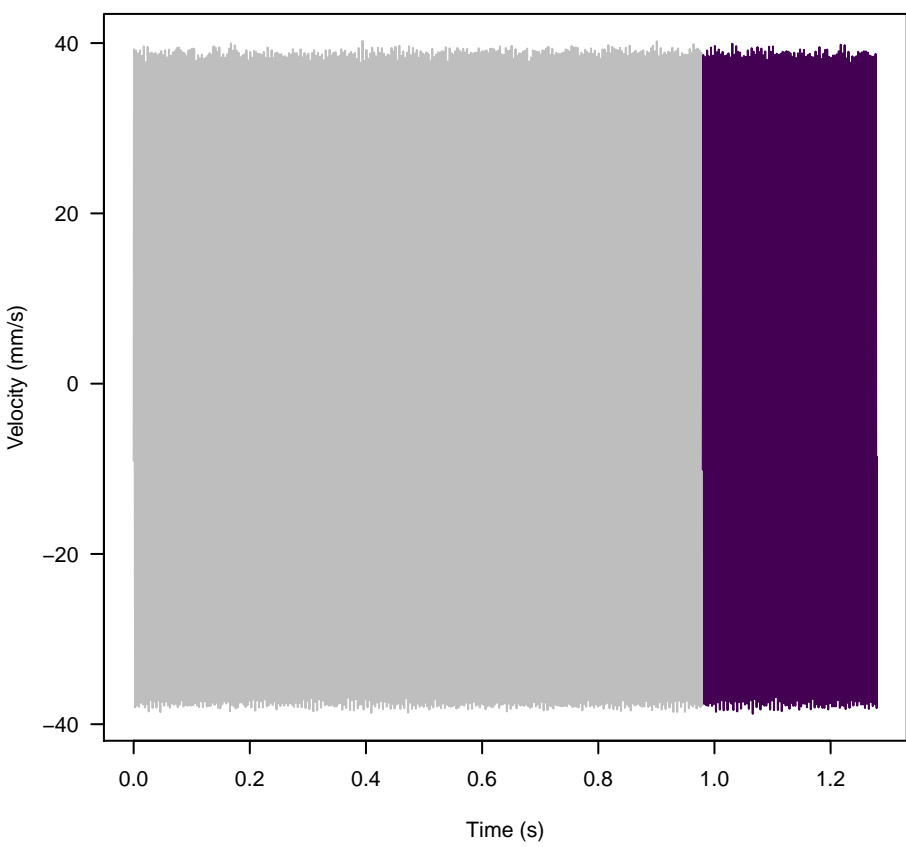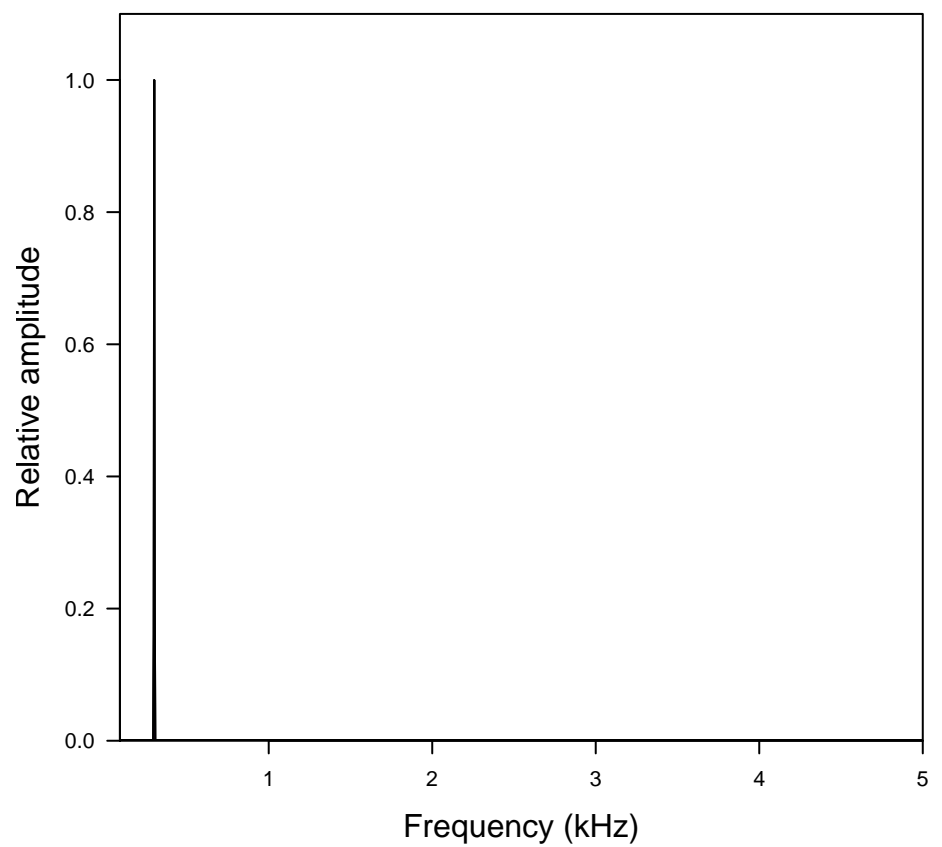



Vel. = 0.057 ; Str. = Corolla ; Axis = x ; Fl. accession = 10-s-81-8

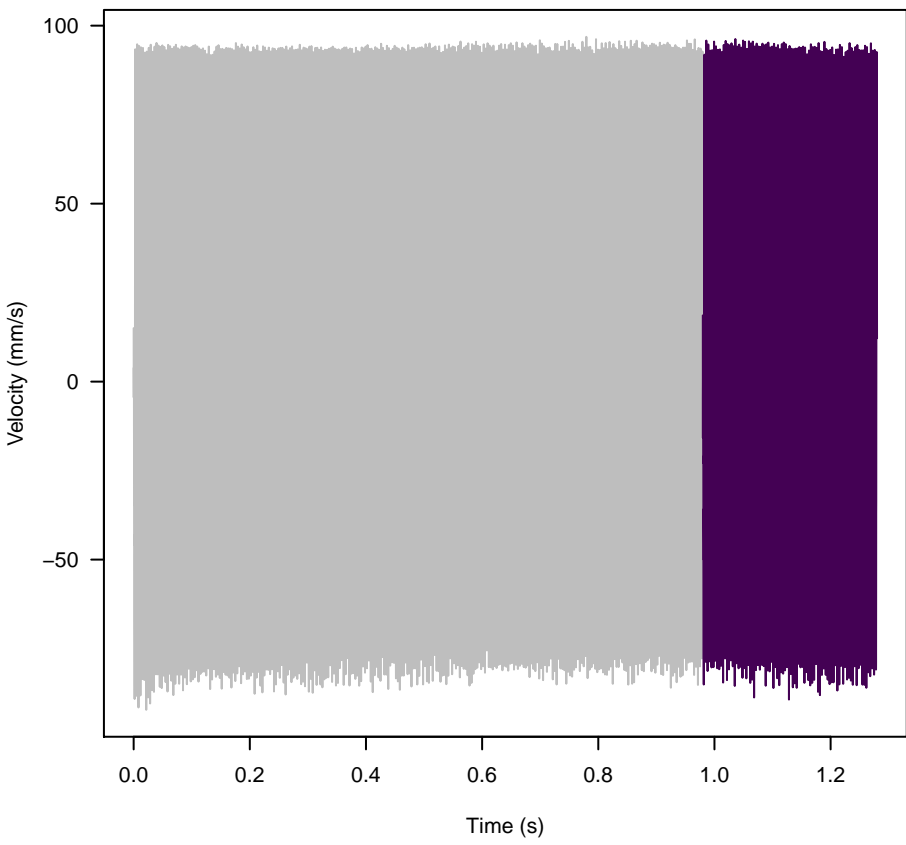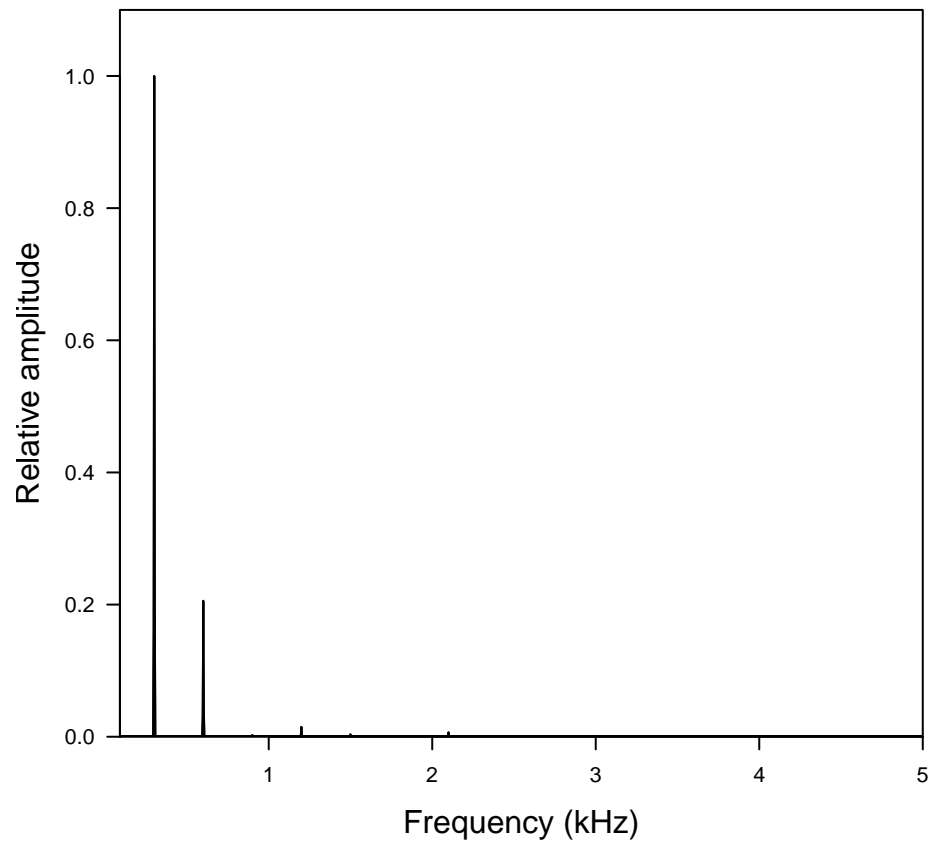

Vel. = 0.057 ; Str. = Receptacle ; Axis = x ; Fl. accession = 10-s-81-8

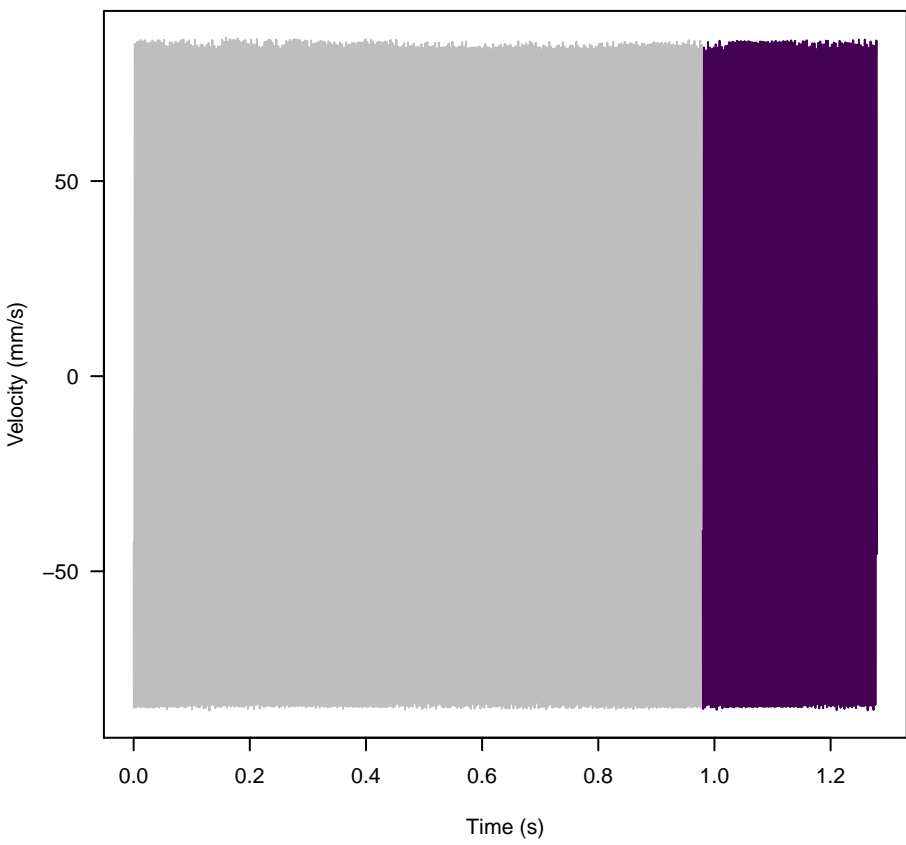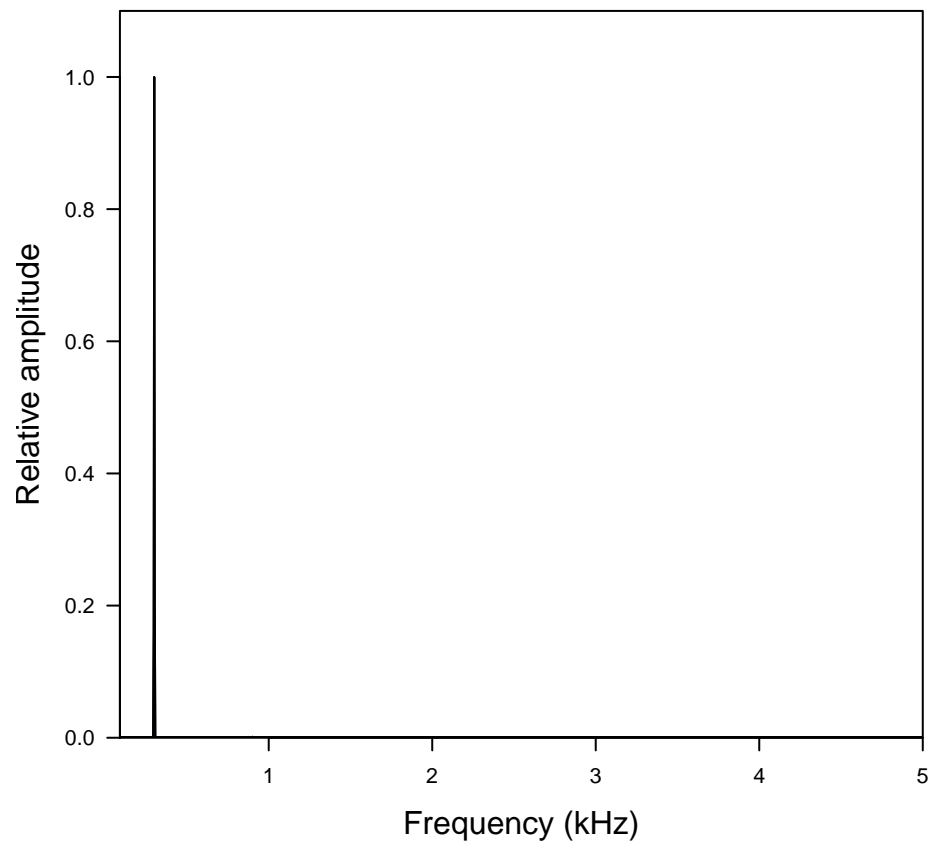

Vel. = 0.057 ; Str. = FA ; Axis = x ; Fl. accession = 10-s-81-8

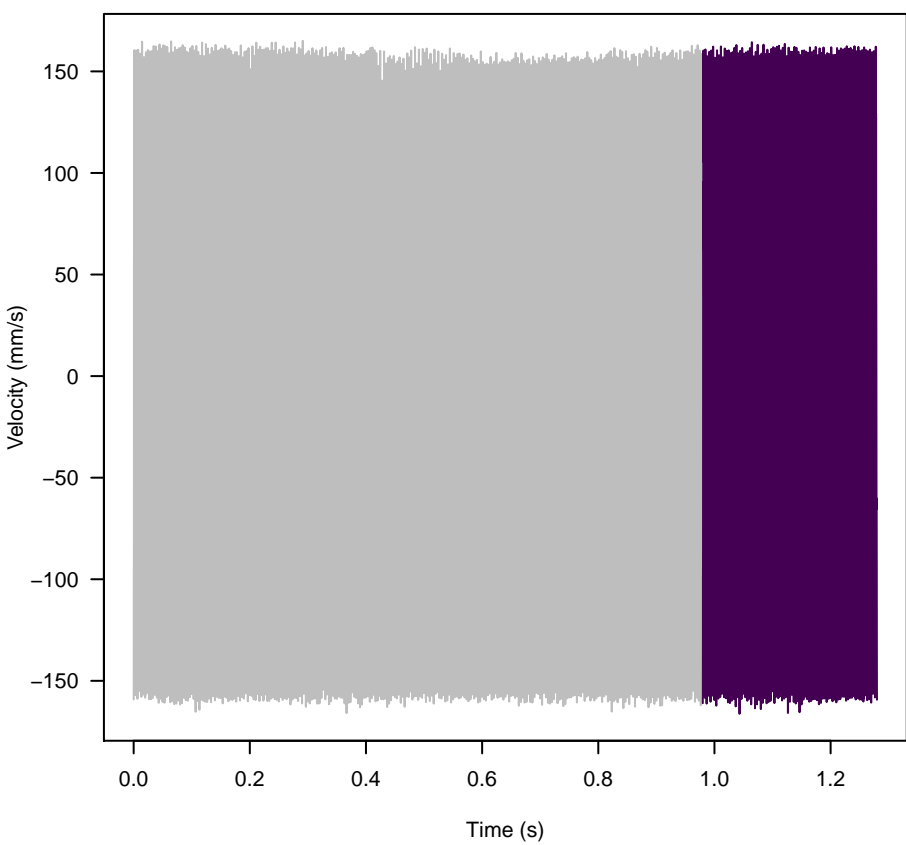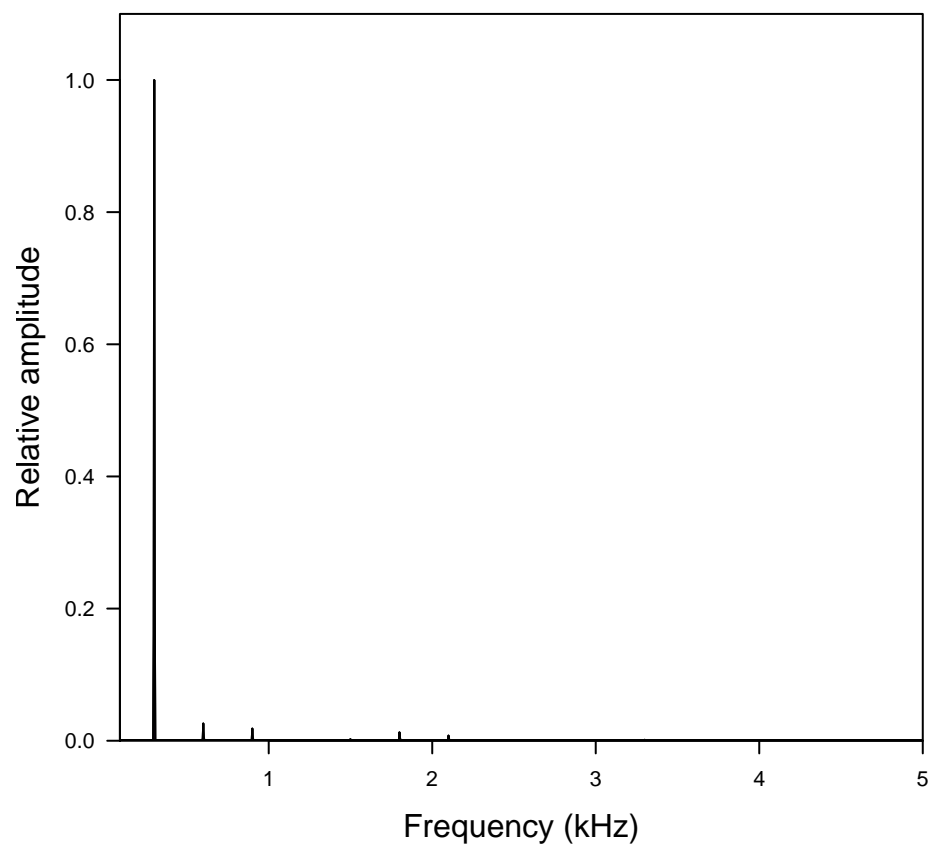

Vel. = 0.057 ; Str. = Receptacle ; Axis = x ; Fl. accession = 10-s-81-8

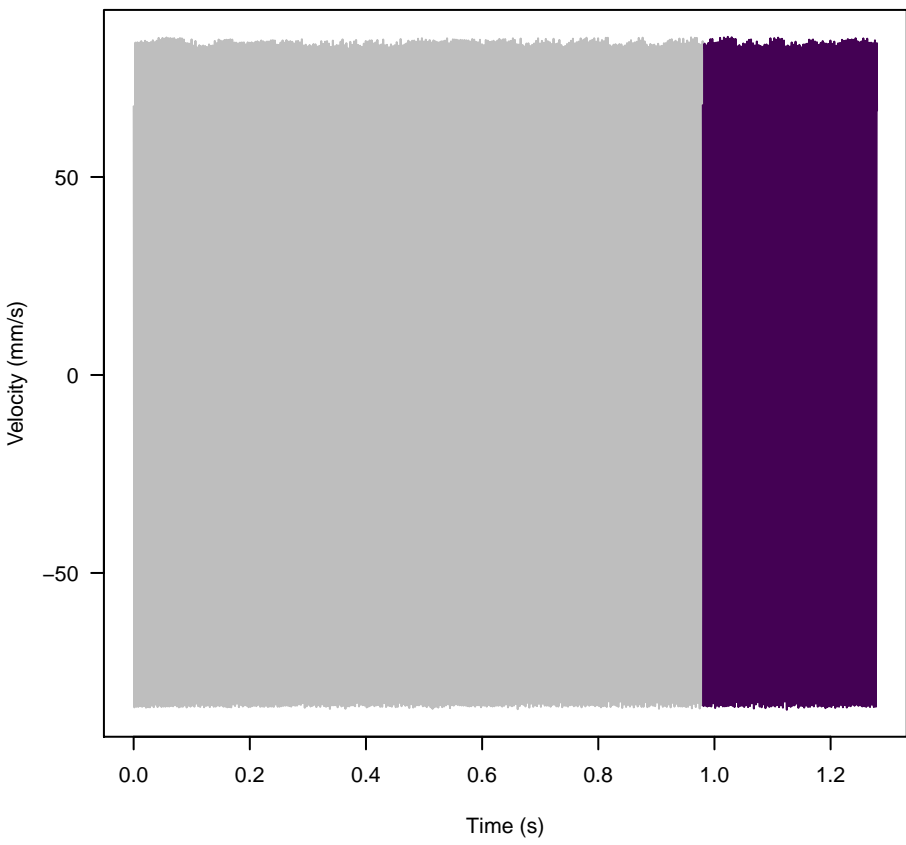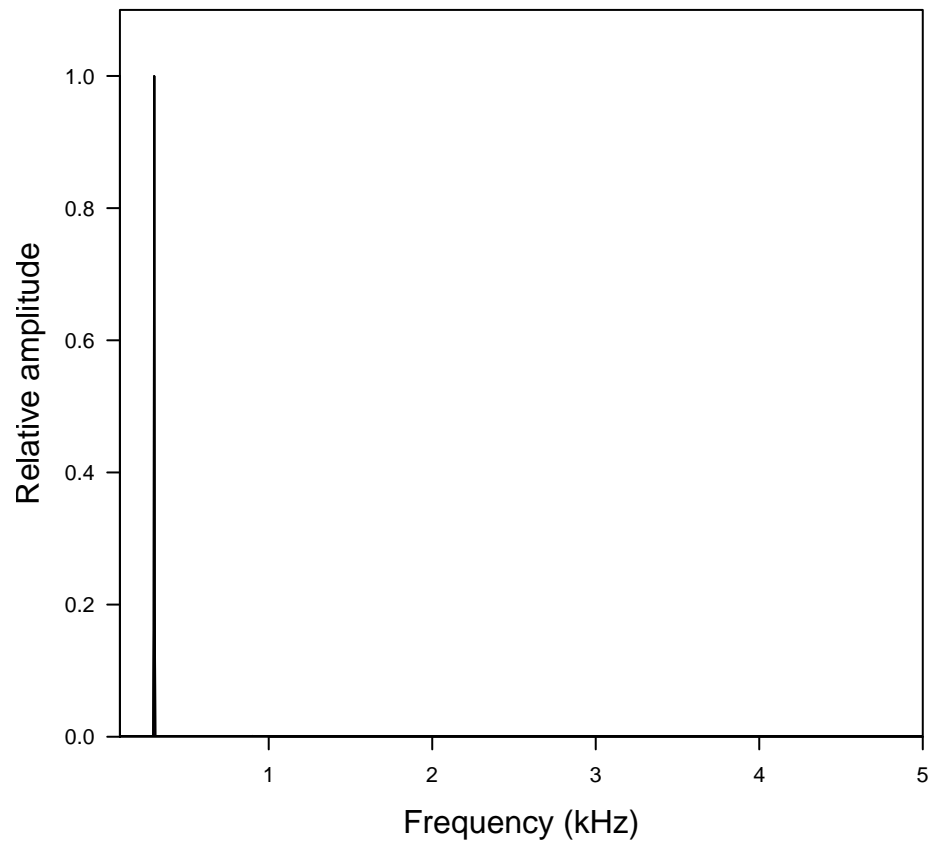

Vel. = 0.057 ; Str. = PA ; Axis = x ; Fl. accession = 10-s-81-8

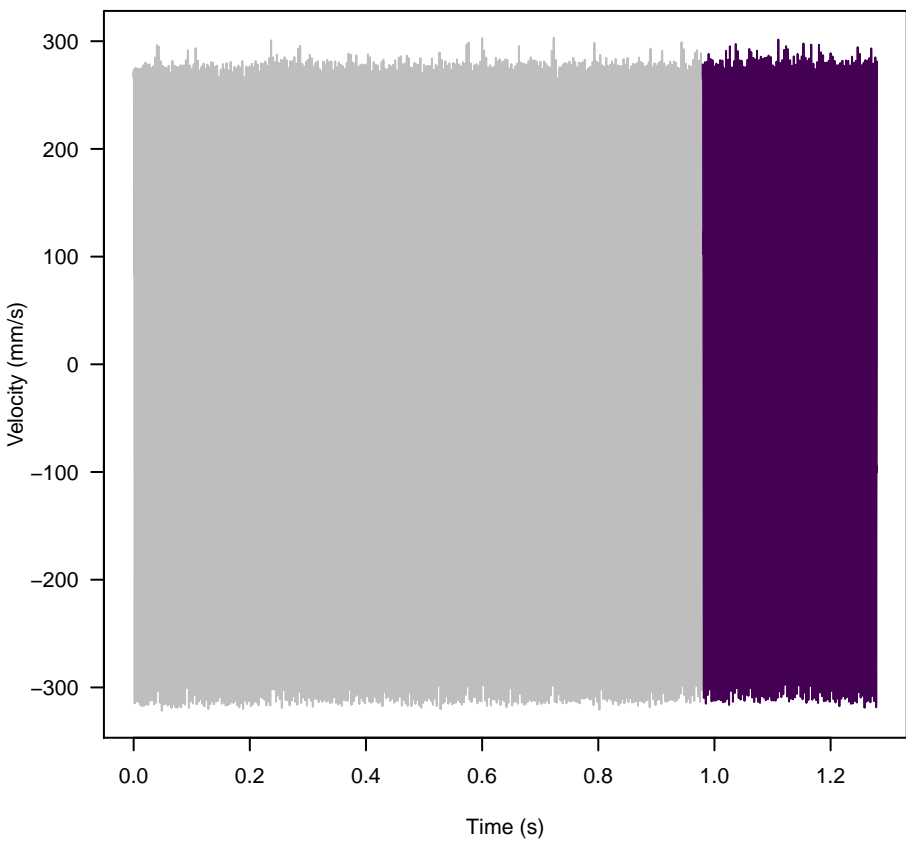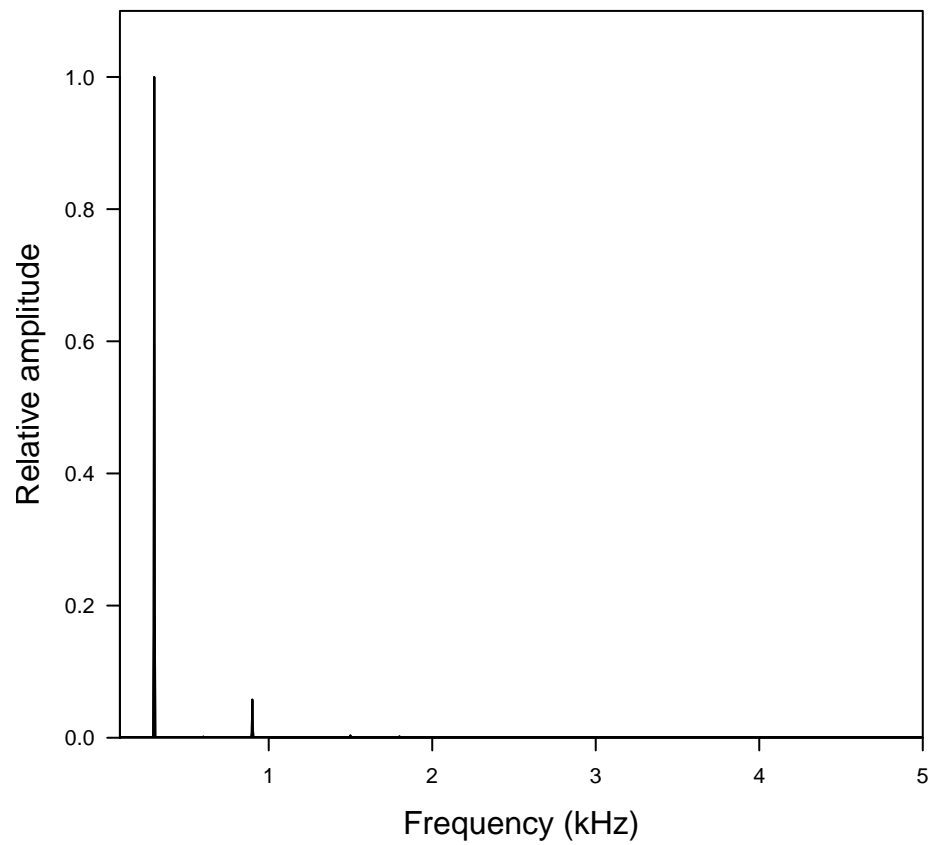

Vel. = 0.057 ; Str. = Receptacle ; Axis = x ; Fl. accession = 10-s-81-8

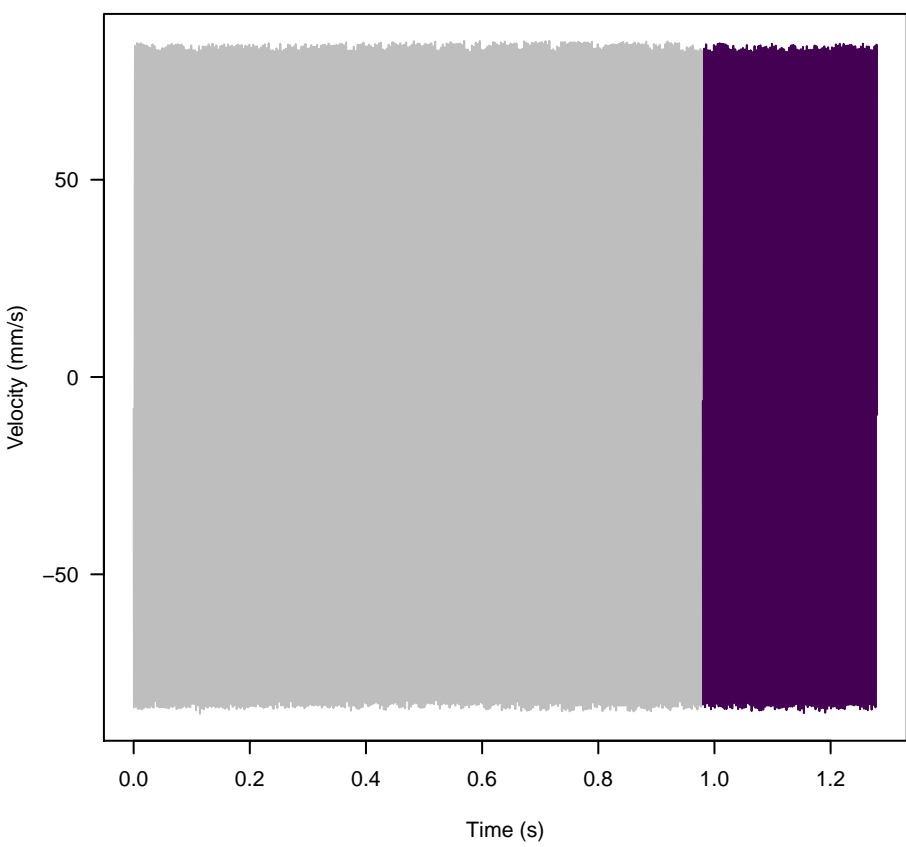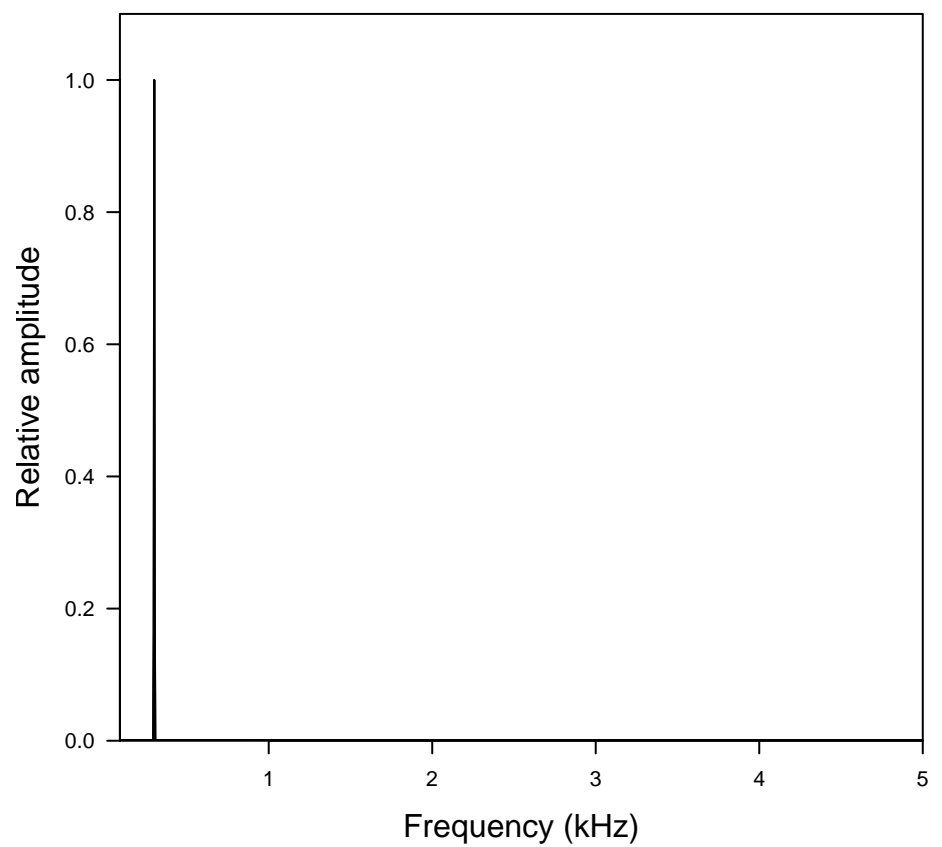

Vel. = 0.057 ; Str. = Corolla ; Axis = z ; Fl. accession = 10-s-81-8

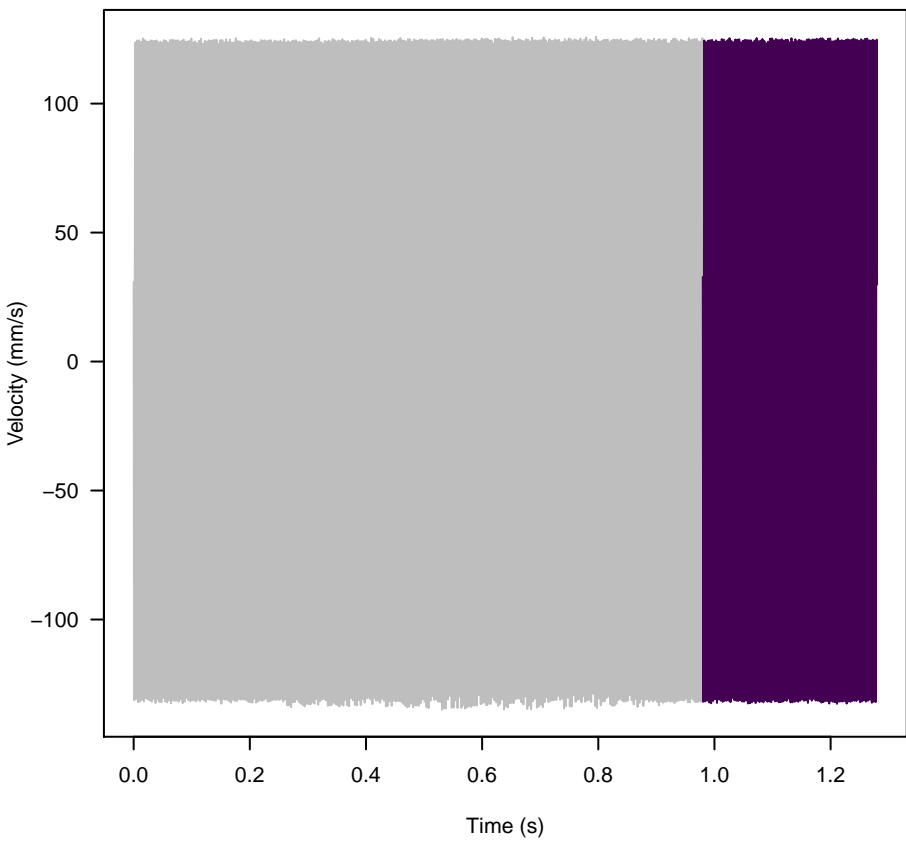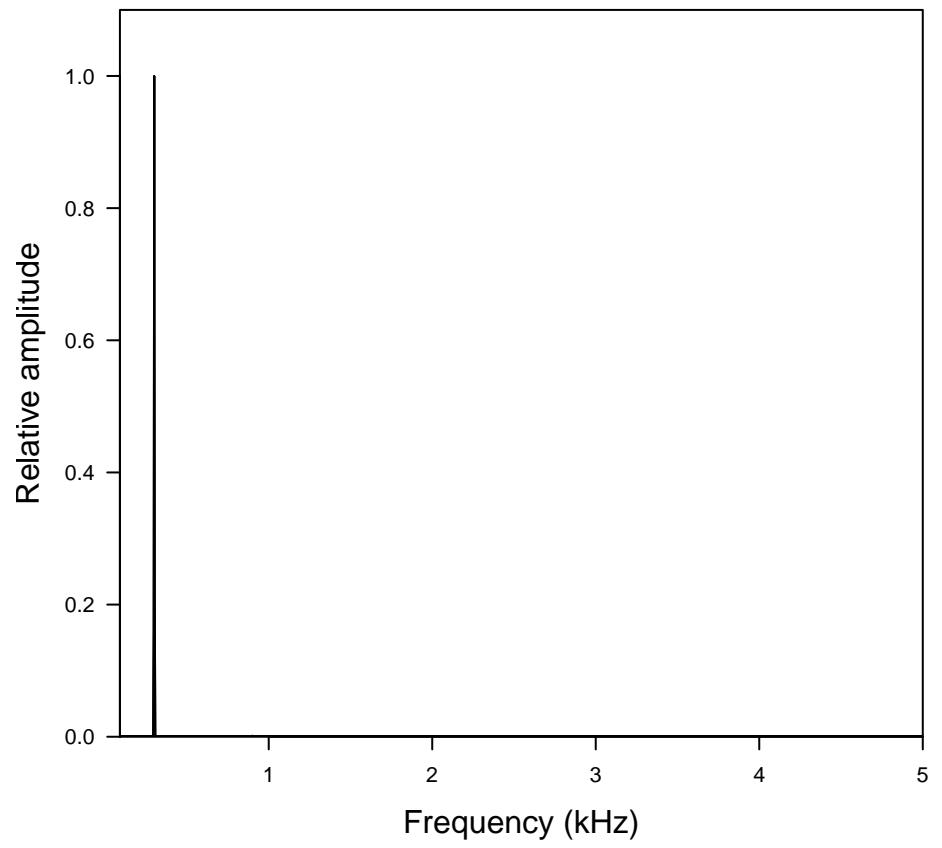

Vel. = 0.057 ; Str. = Receptacle ; Axis = z ; Fl. accession = 10-s-81-8

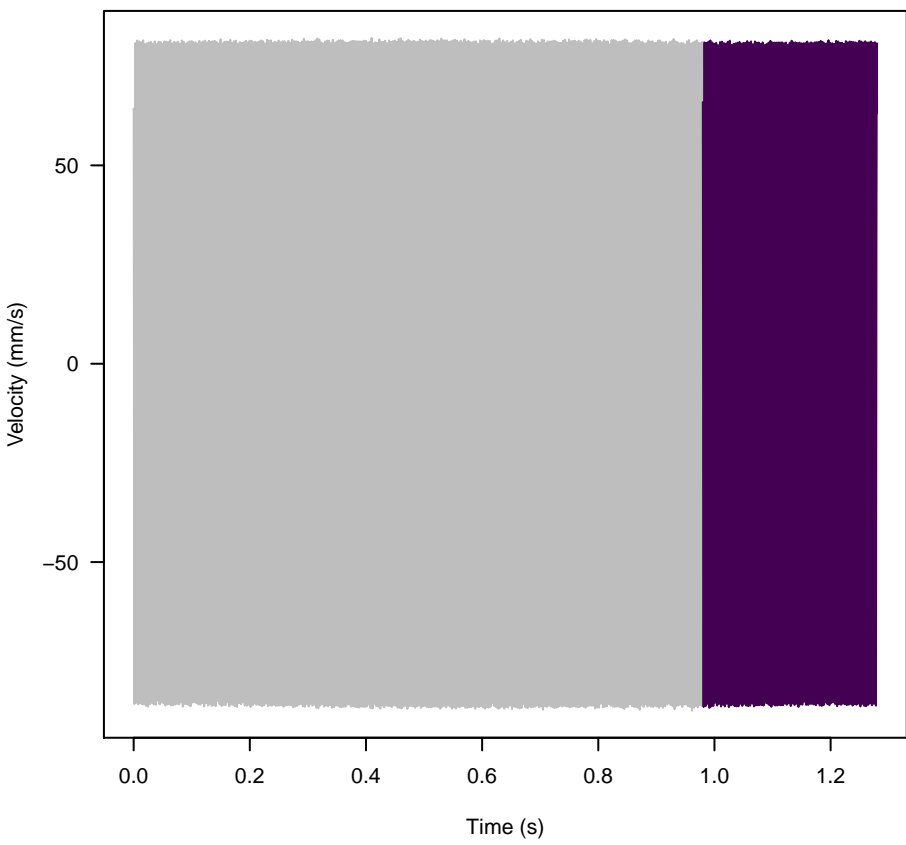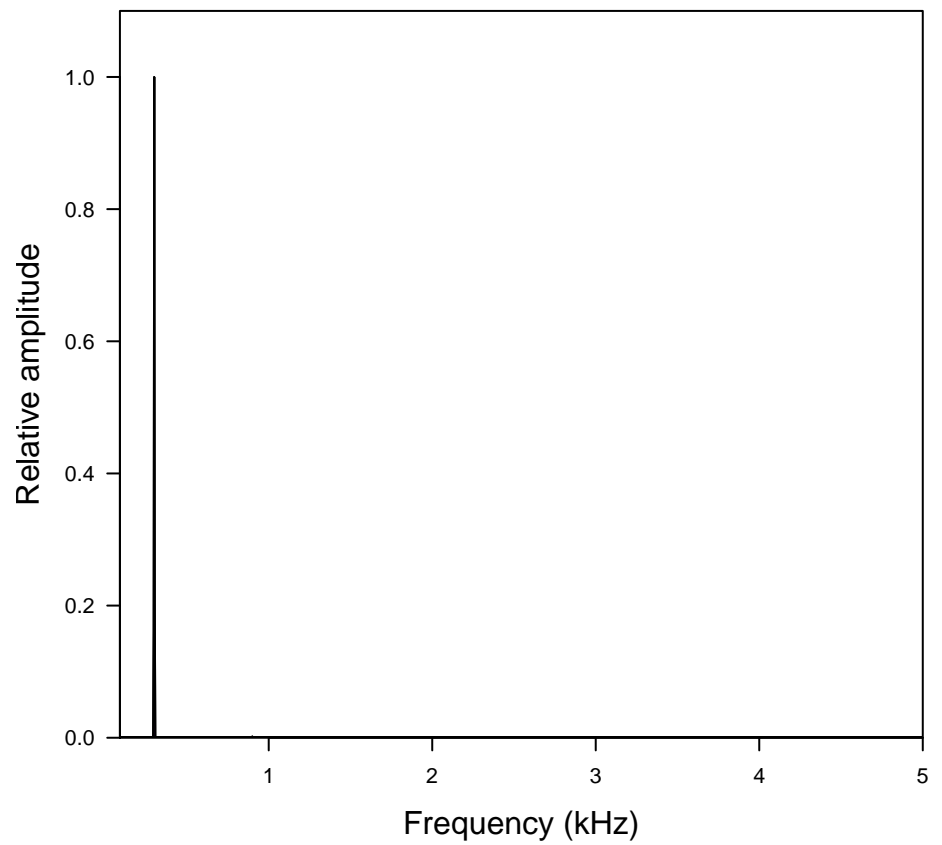

Vel. = 0.057 ; Str. = FA ; Axis = z ; Fl. accession = 10-s-81-8

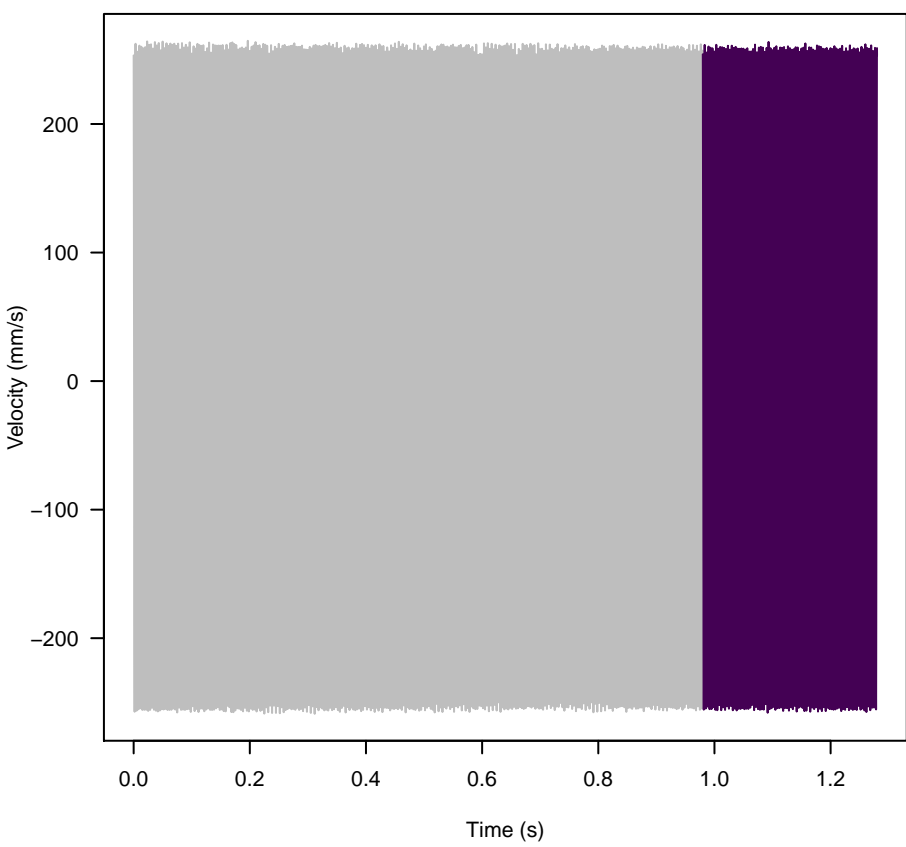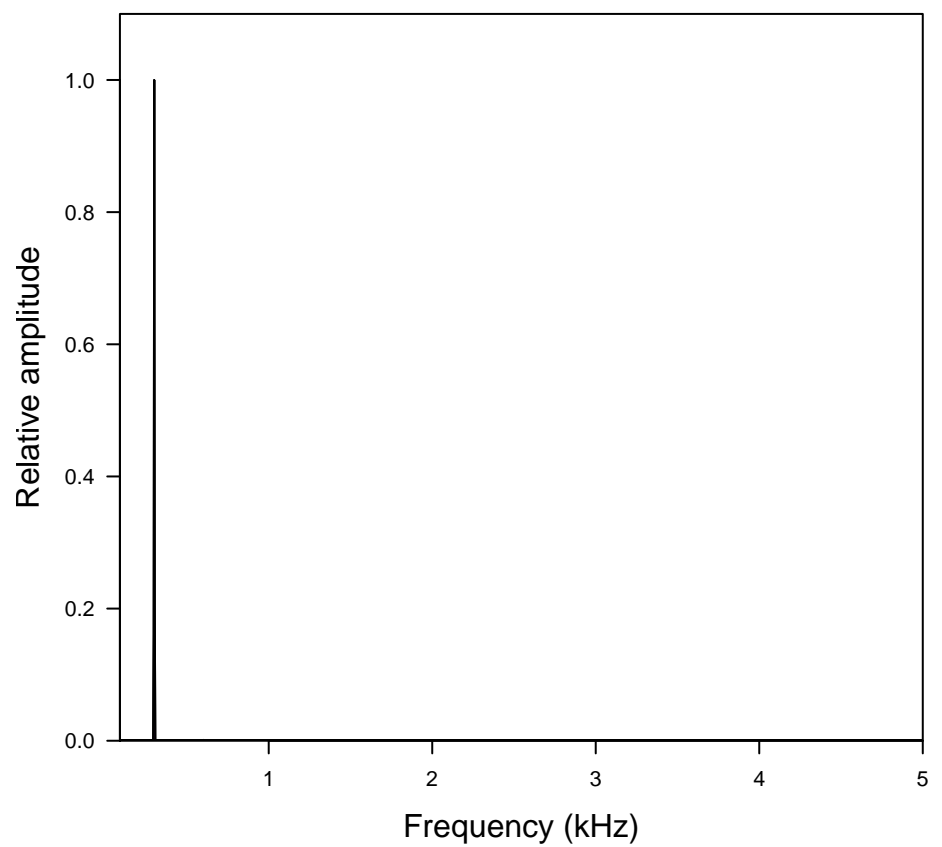

Vel. = 0.057 ; Str. = Receptacle ; Axis = z ; Fl. accession = 10-s-81-8

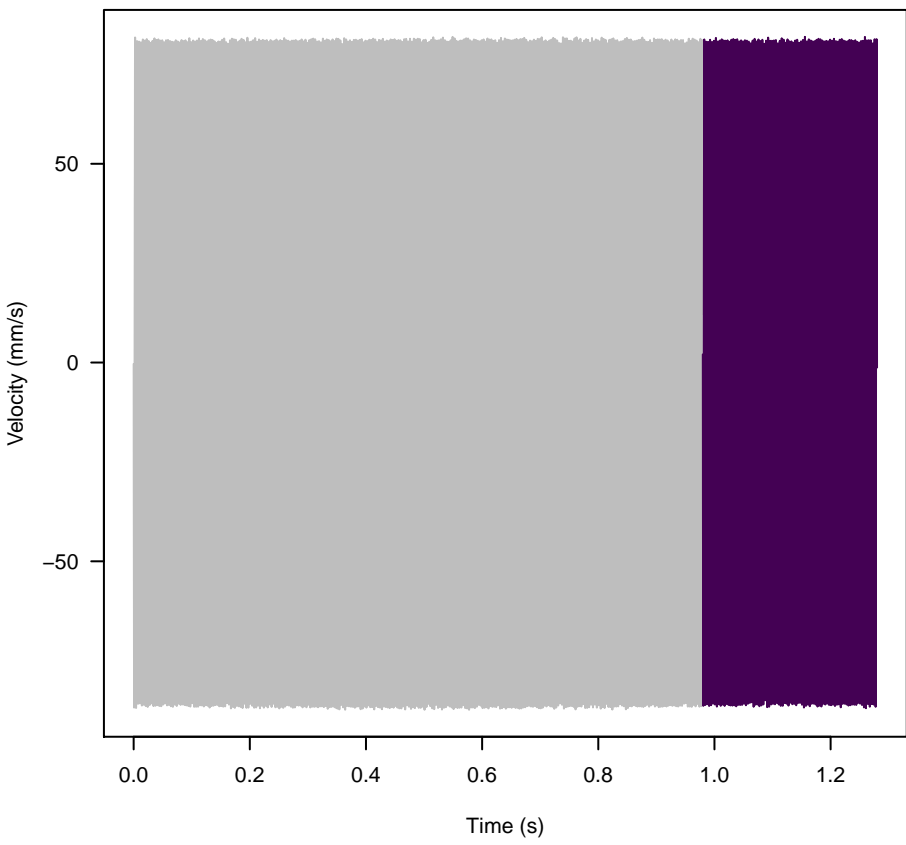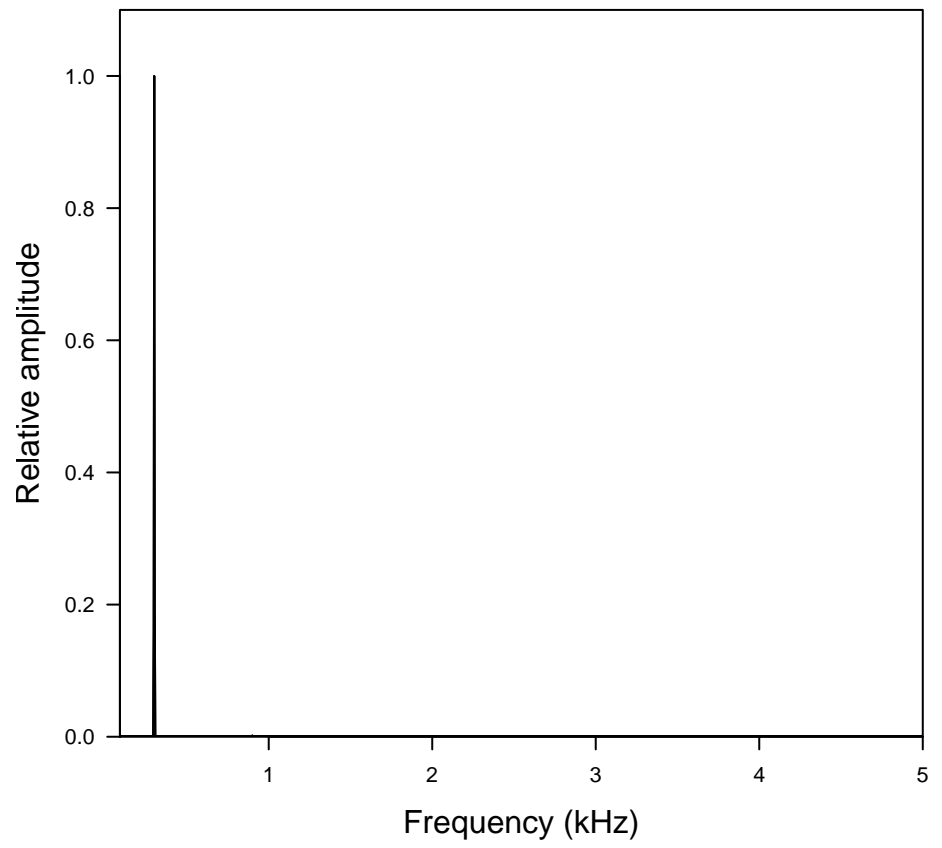

Vel. = 0.057 ; Str. = PA ; Axis = z ; Fl. accession = 10-s-81-8

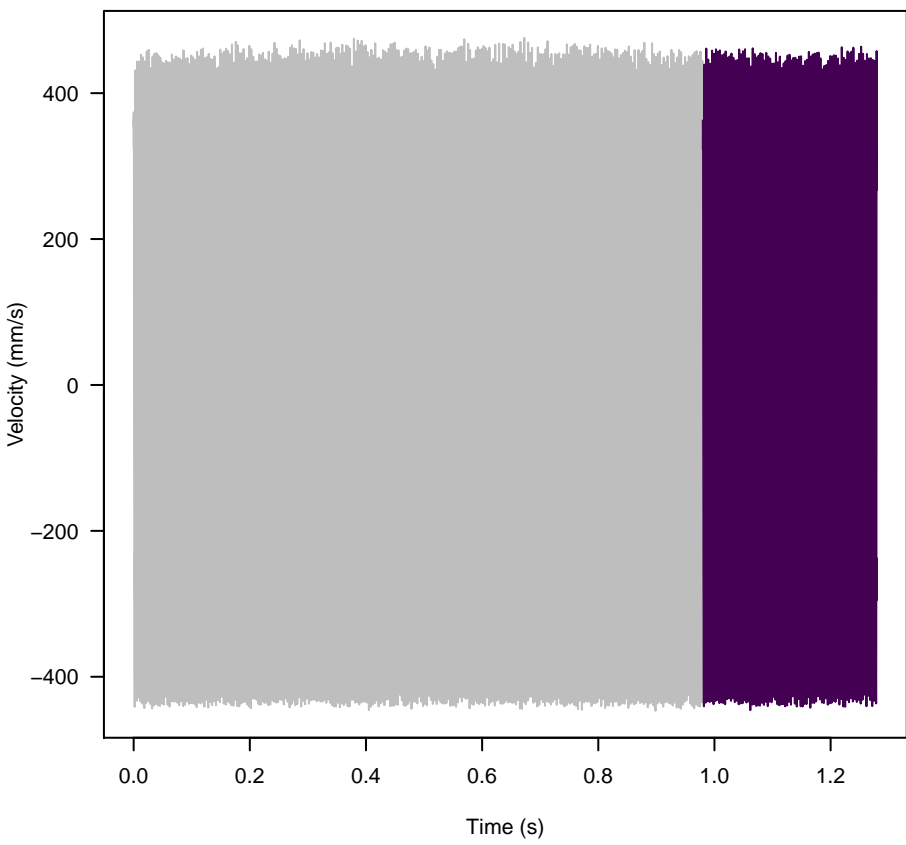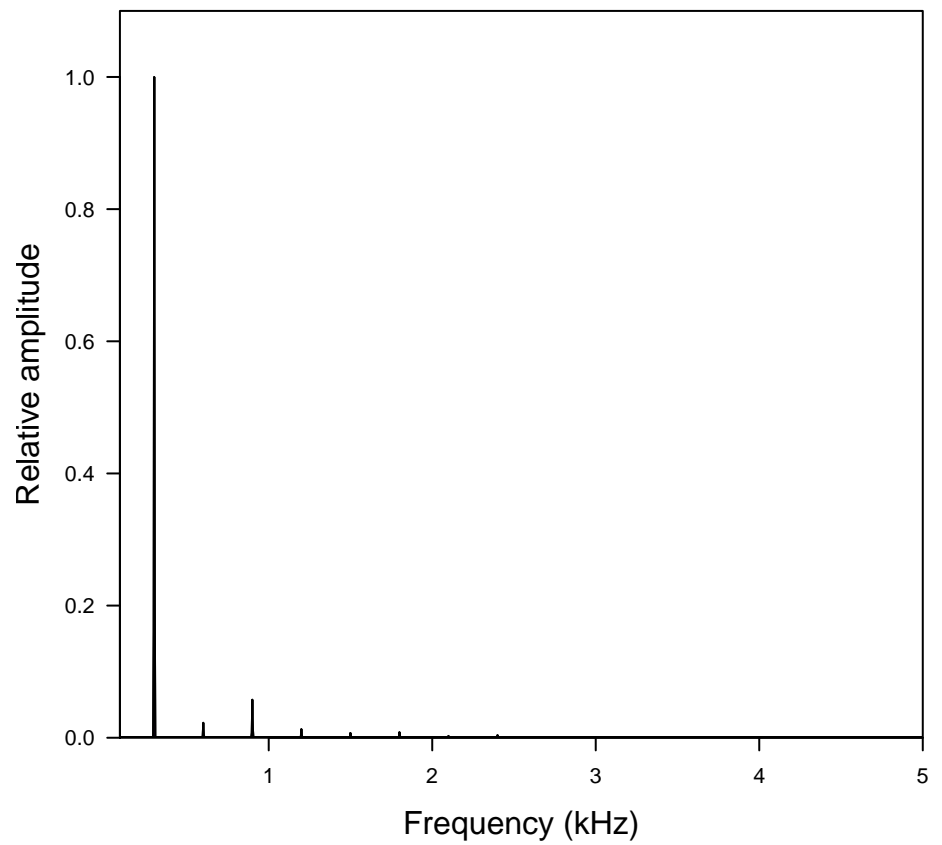

Vel. = 0.057 ; Str. = Receptacle ; Axis = z ; Fl. accession = 10-s-81-8

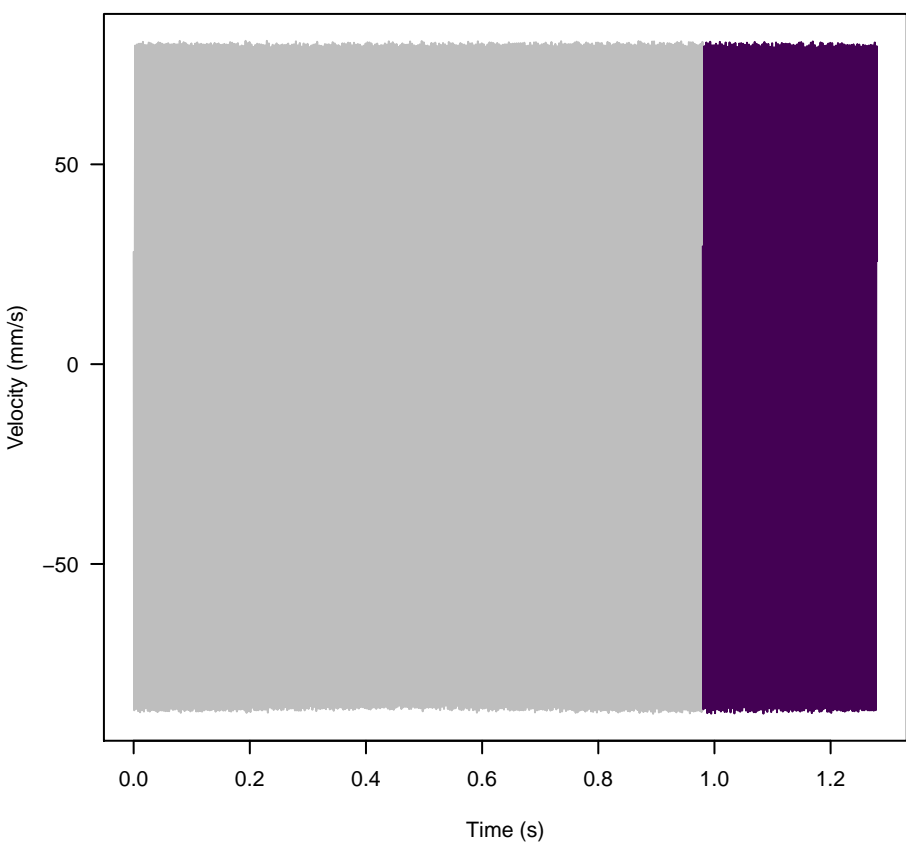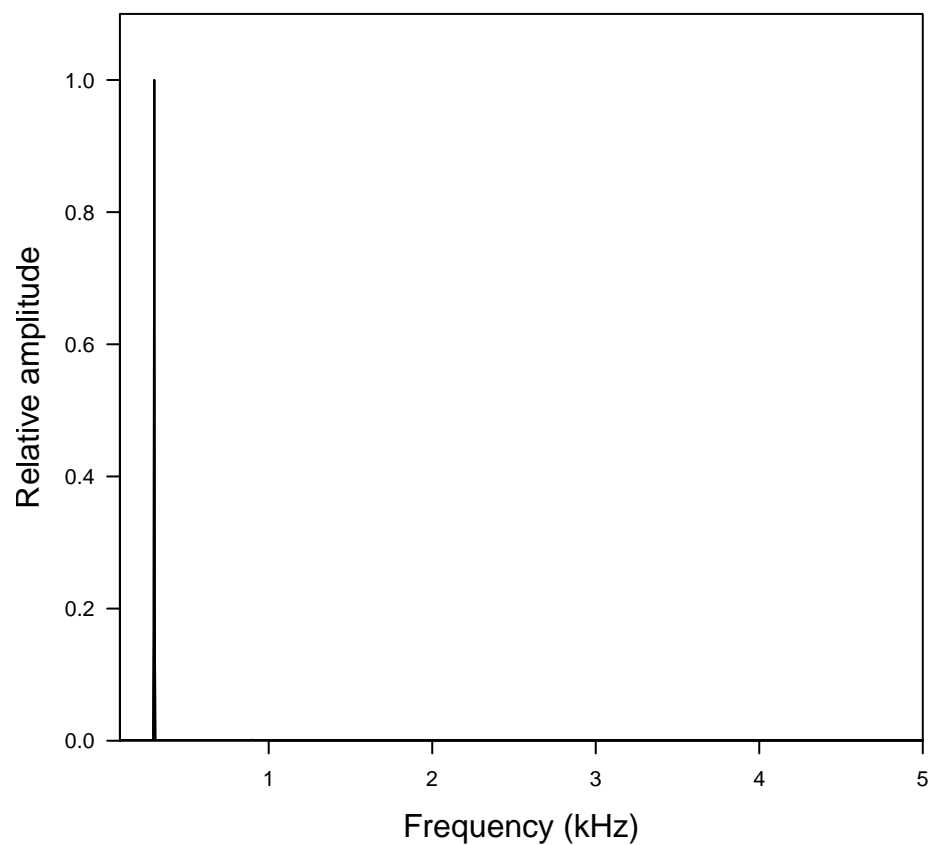

Vel. = 0.028 ; Str. = PA ; Axis = z ; Fl. accession = 10-s-81-8

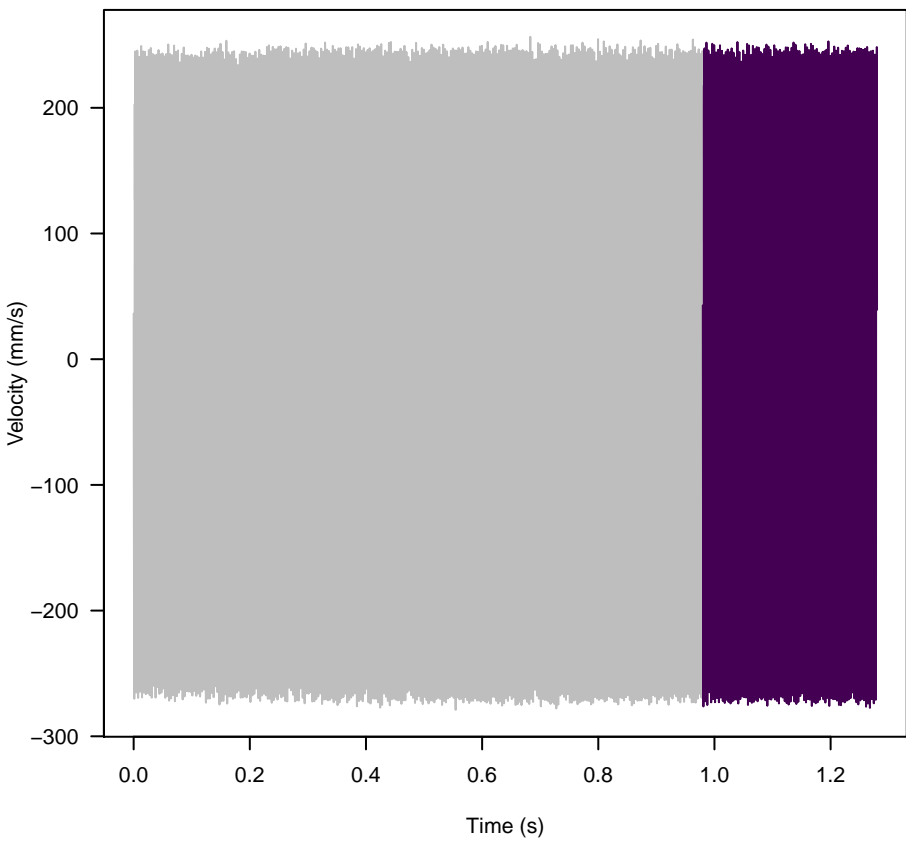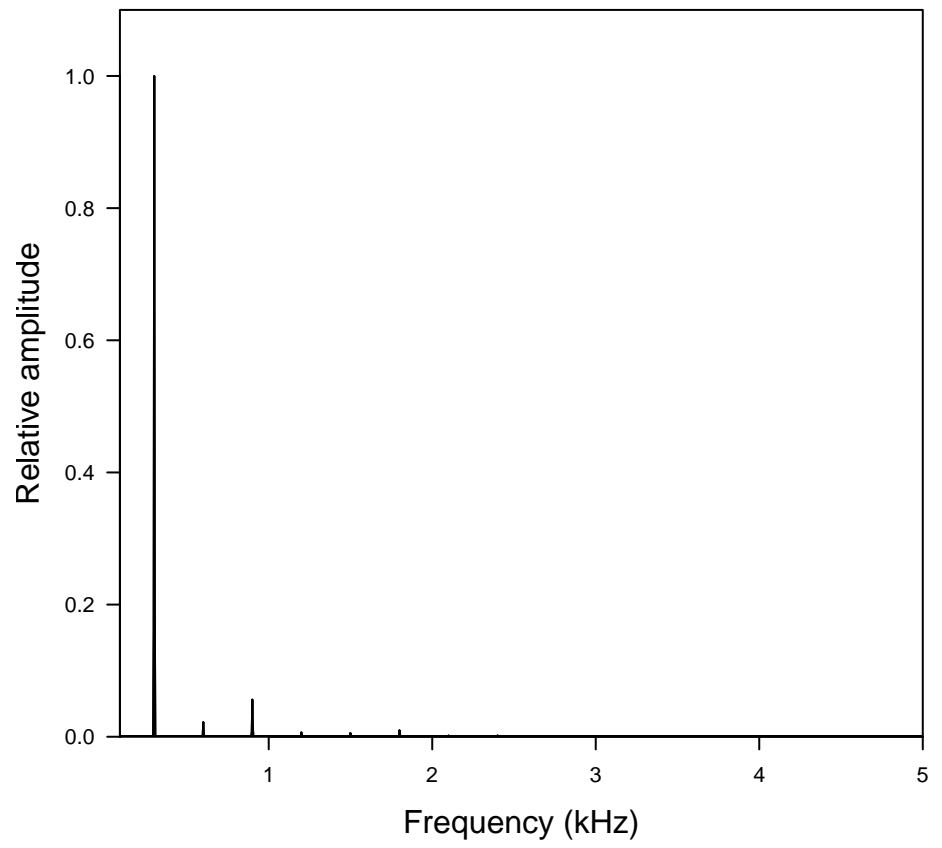

Vel. = 0.028 ; Str. = Receptacle ; Axis = z ; Fl. accession = 10-s-81-8

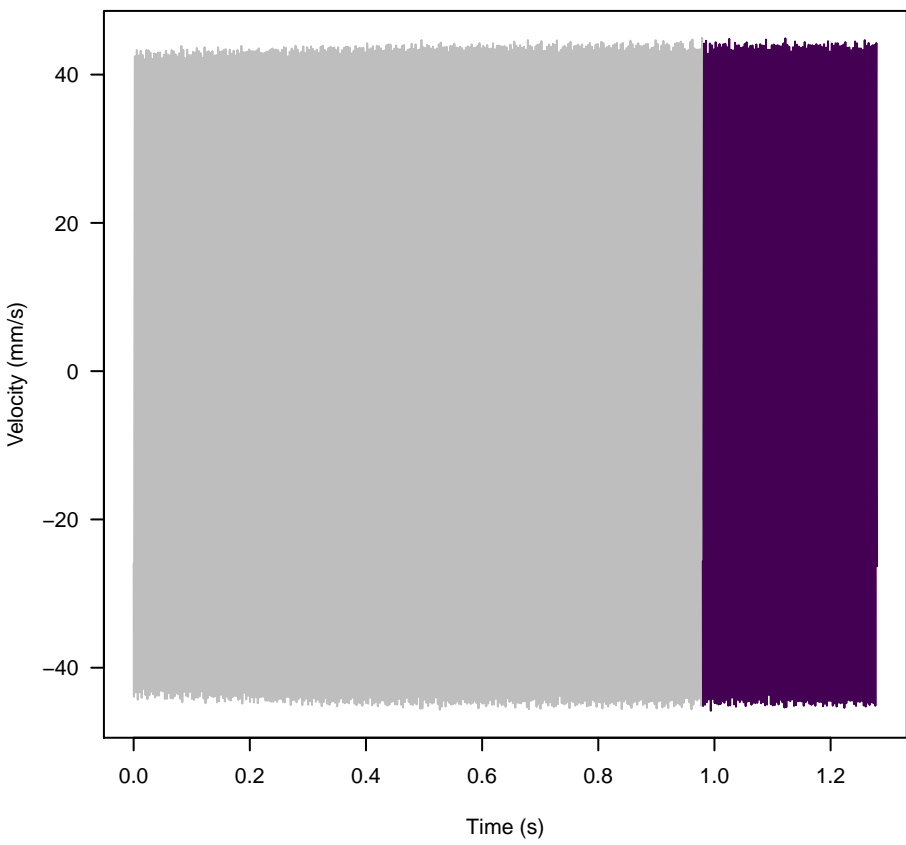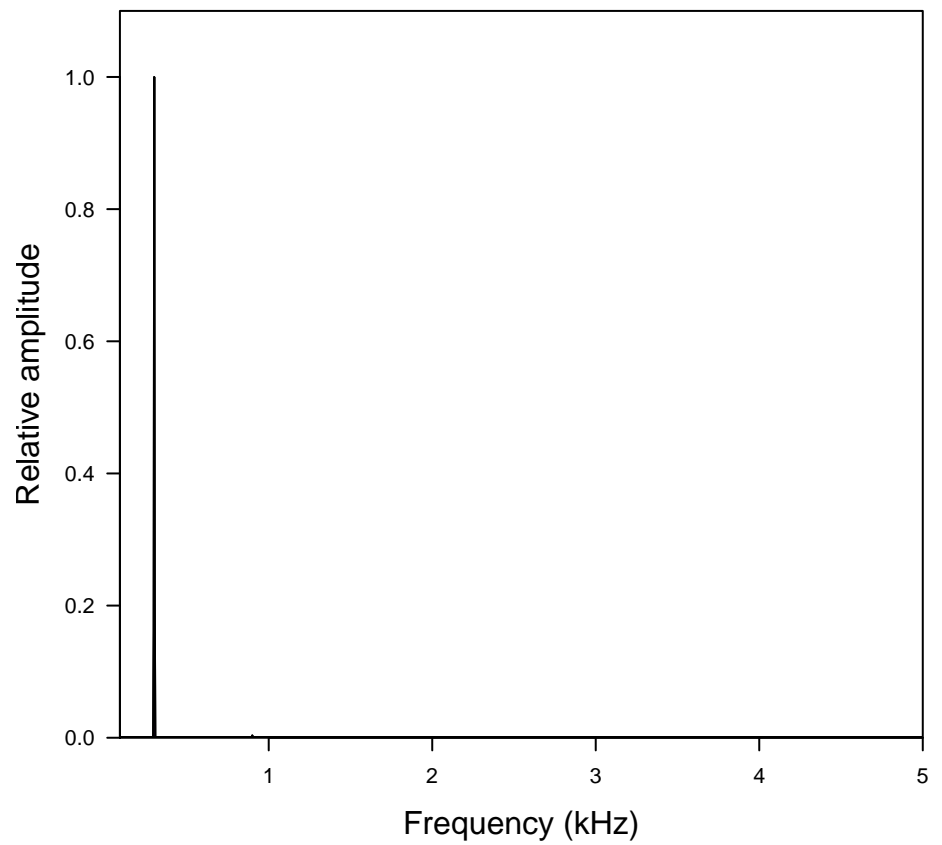

Vel. = 0.028 ; Str. = FA ; Axis = z ; Fl. accession = 10-s-81-8

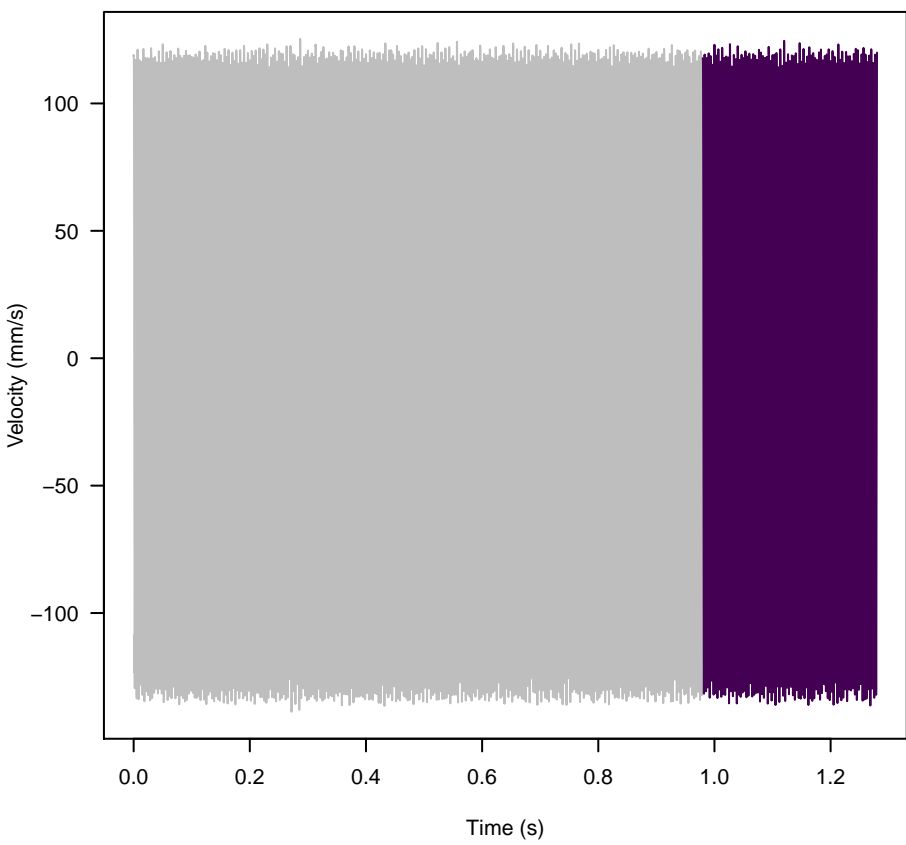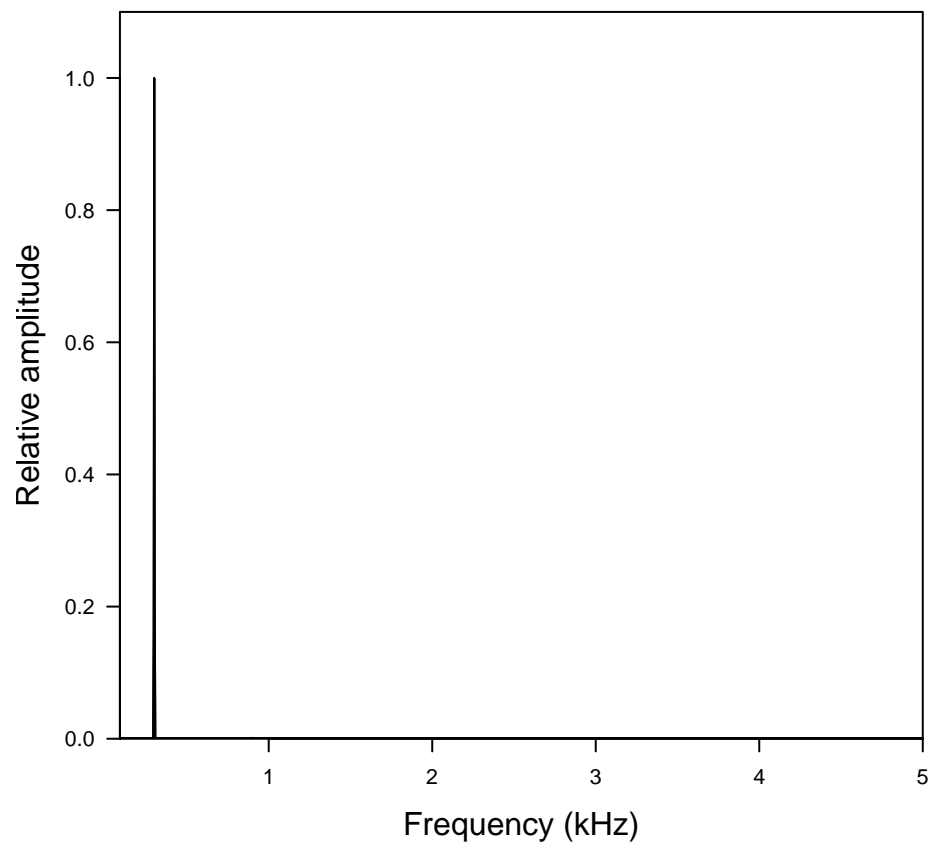

Vel. = 0.028 ; Str. = Receptacle ; Axis = z ; Fl. accession = 10-s-81-8

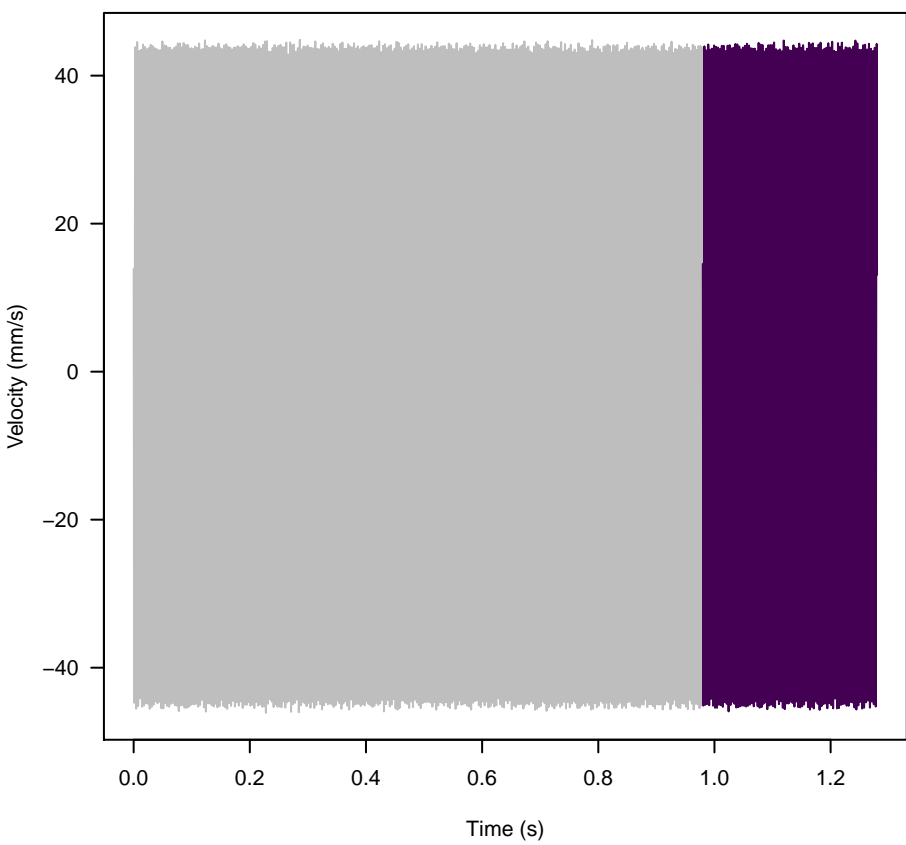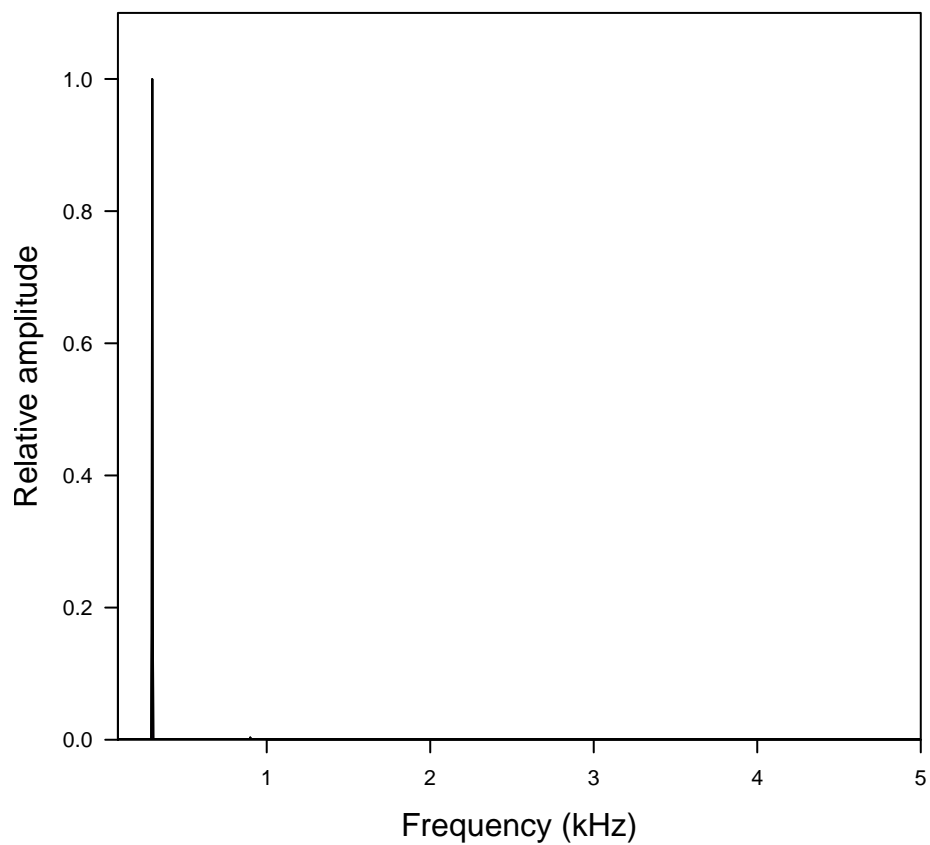

Vel. = 0.028 ; Str. = Corolla ; Axis = z ; Fl. accession = 10-s-81-8

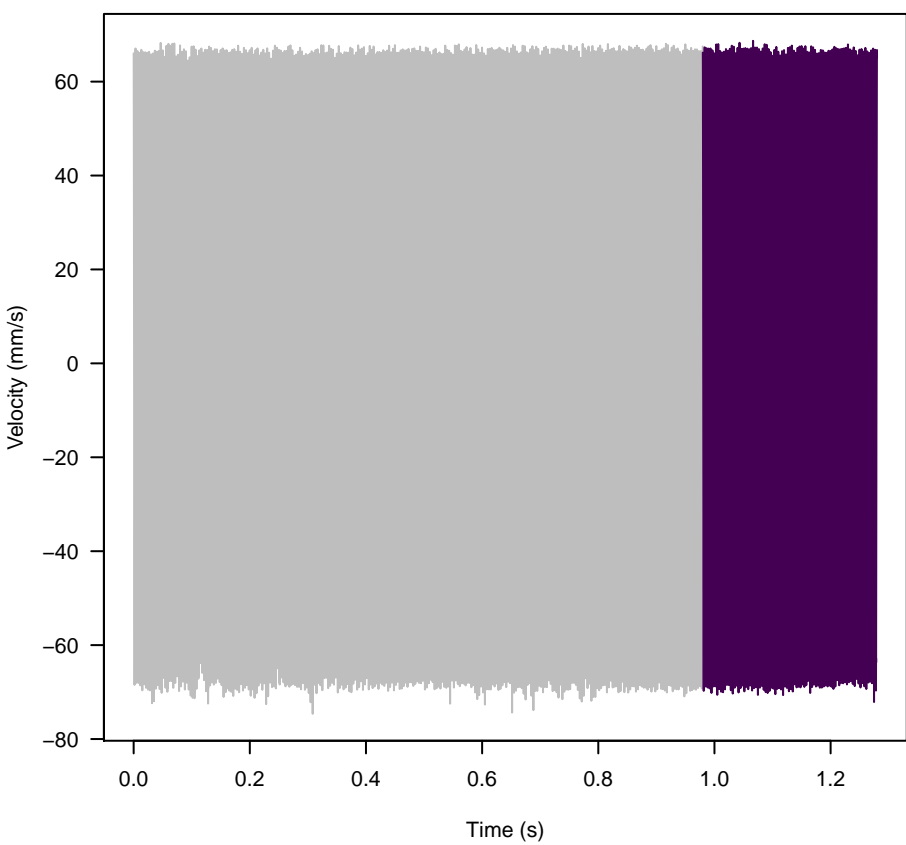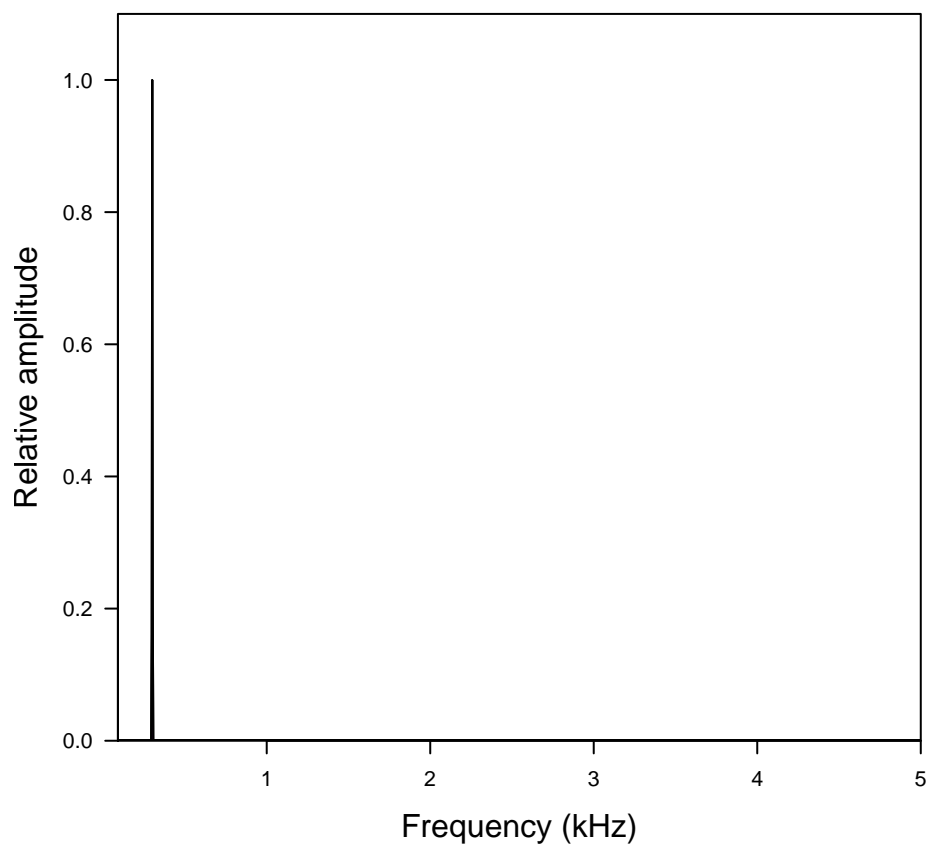

Vel. = 0.028 ; Str. = Receptacle ; Axis = z ; Fl. accession = 10-s-81-8

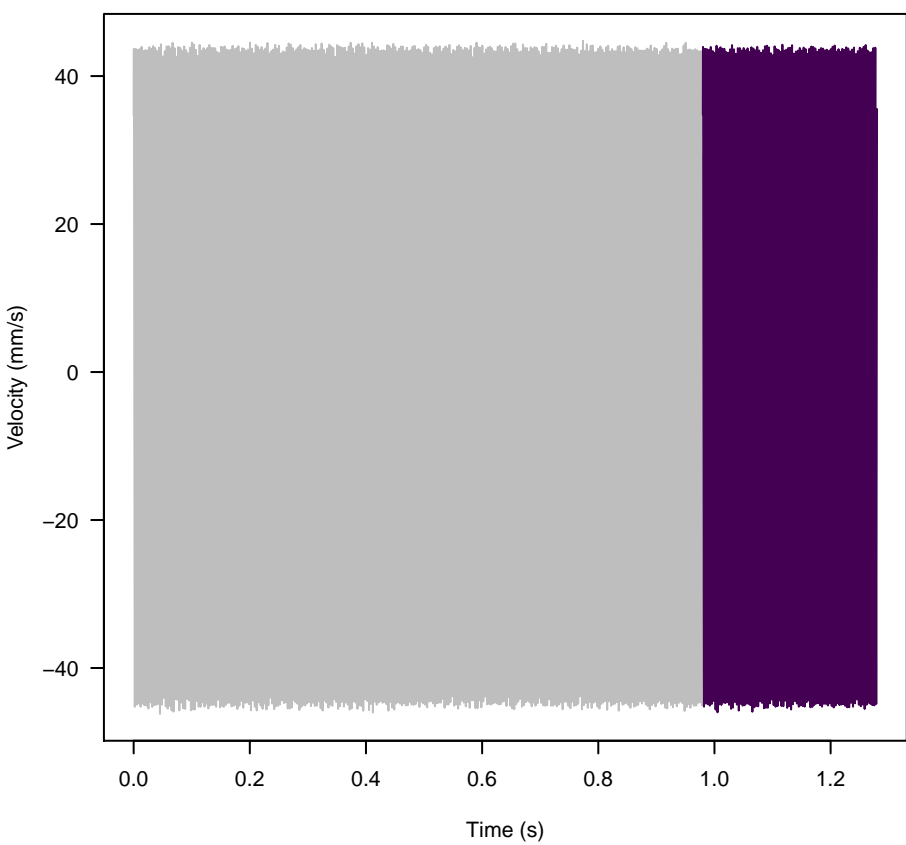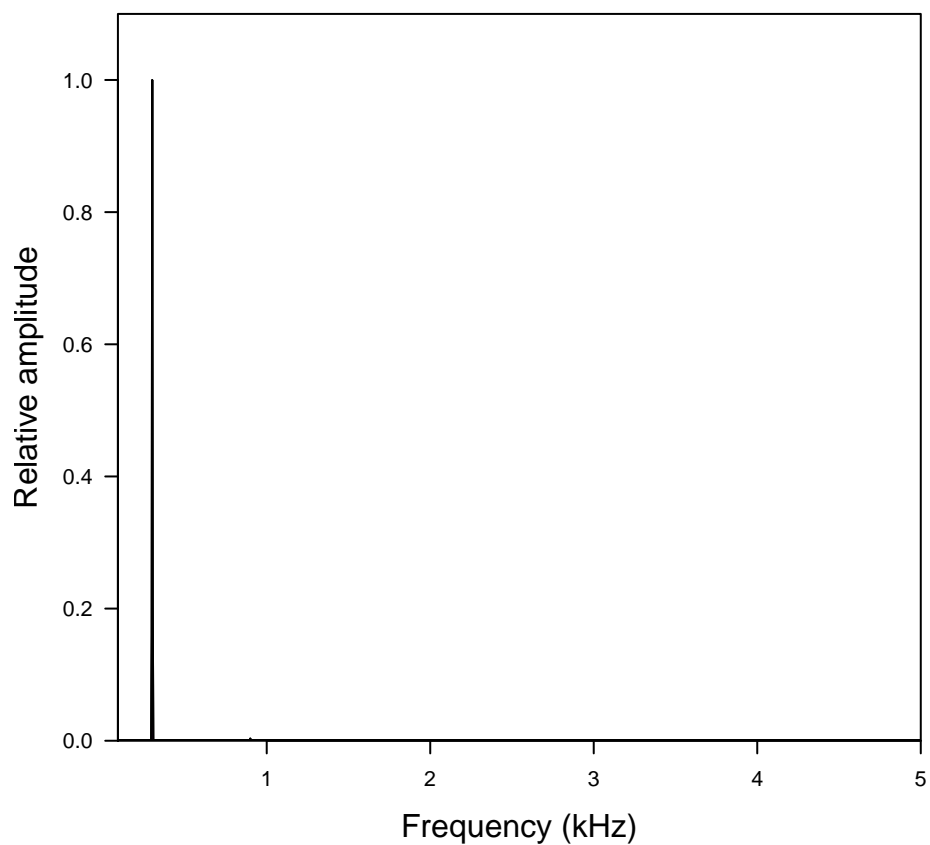

Vel. = 0.014 ; Str. = Corolla ; Axis = z ; Fl. accession = 10-s-81-8

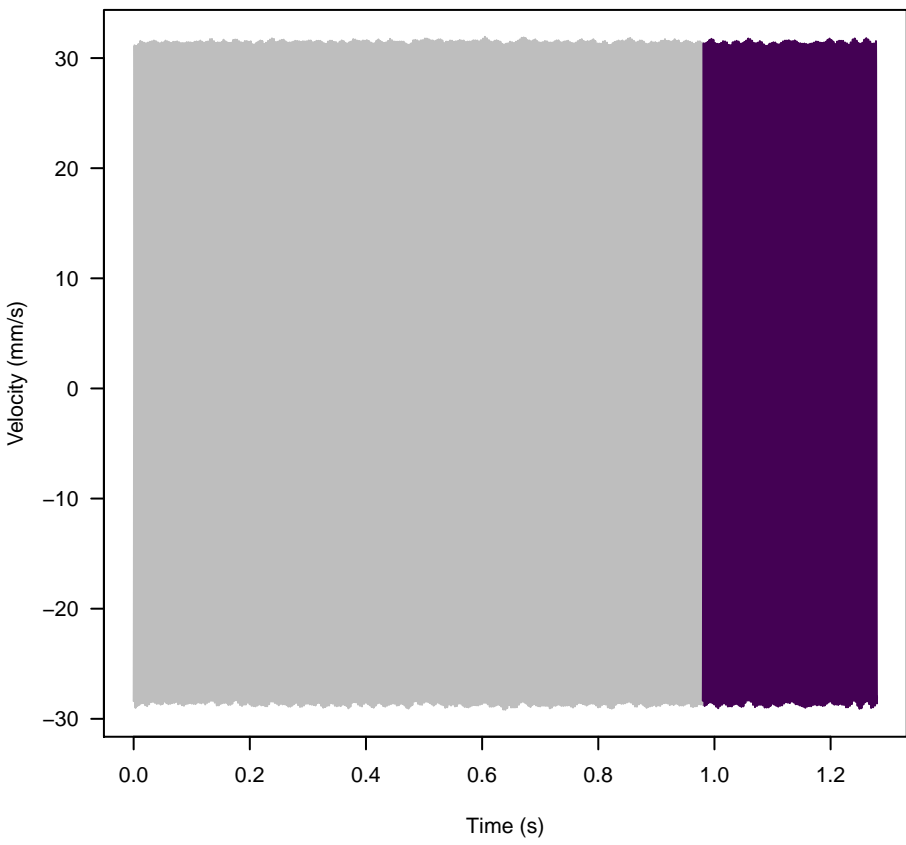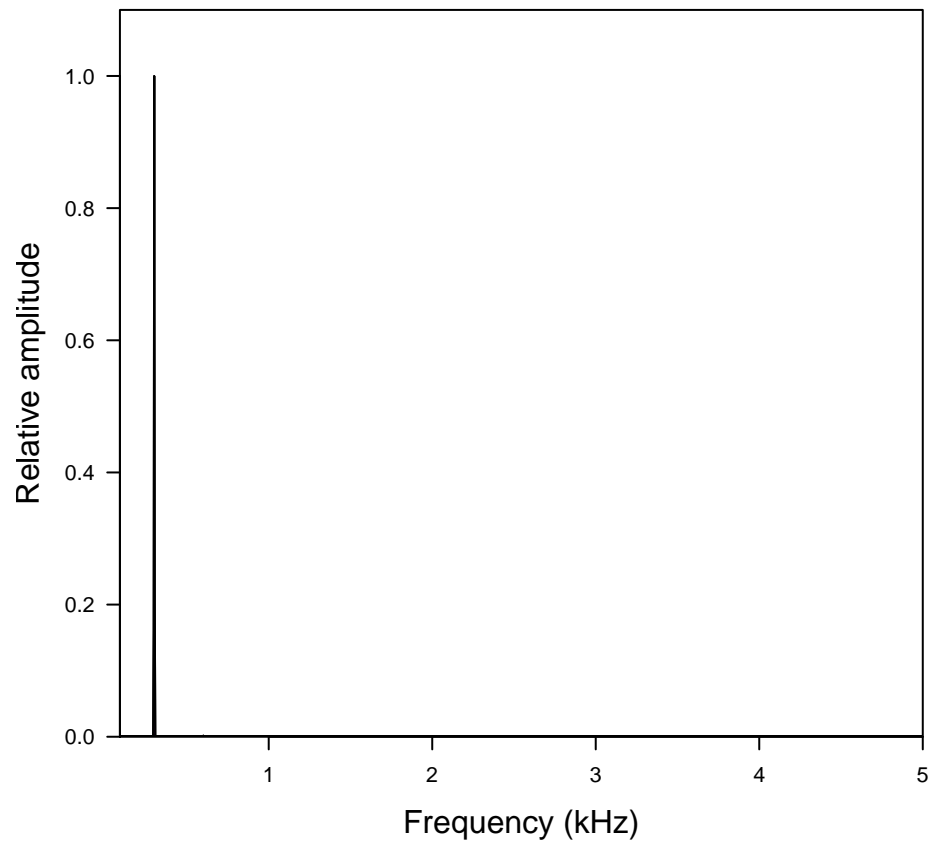

Vel. = 0.014 ; Str. = Receptacle ; Axis = z ; Fl. accession = 10-s-81-8

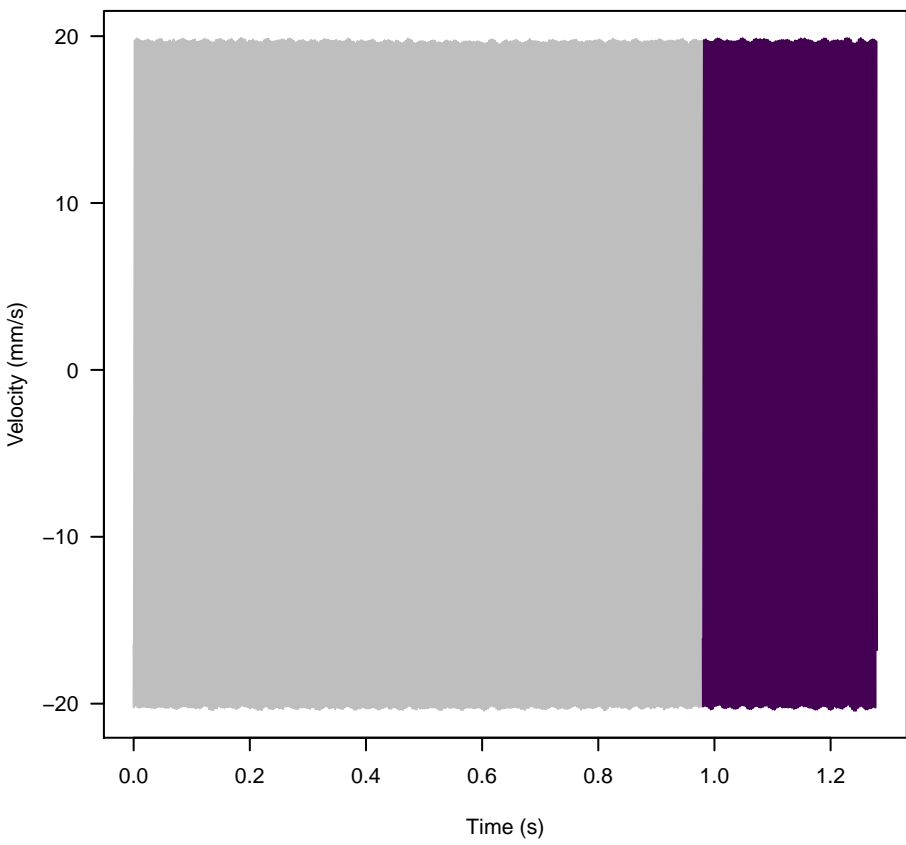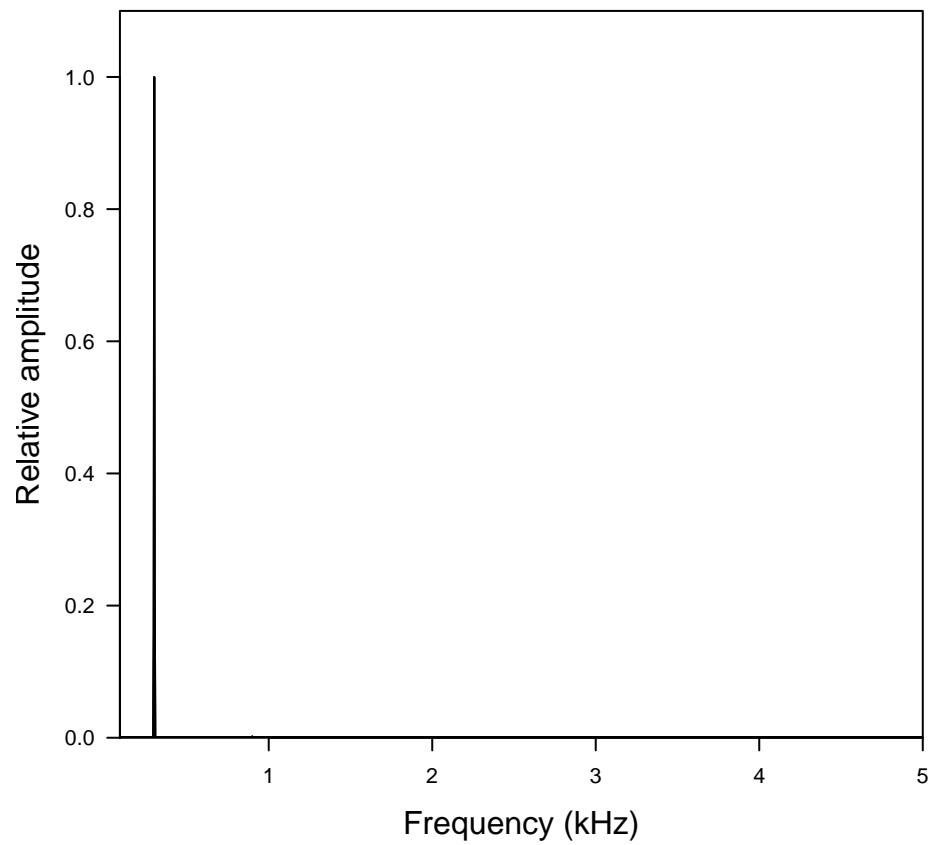

Vel. = 0.014 ; Str. = FA ; Axis = z ; Fl. accession = 10-s-81-8

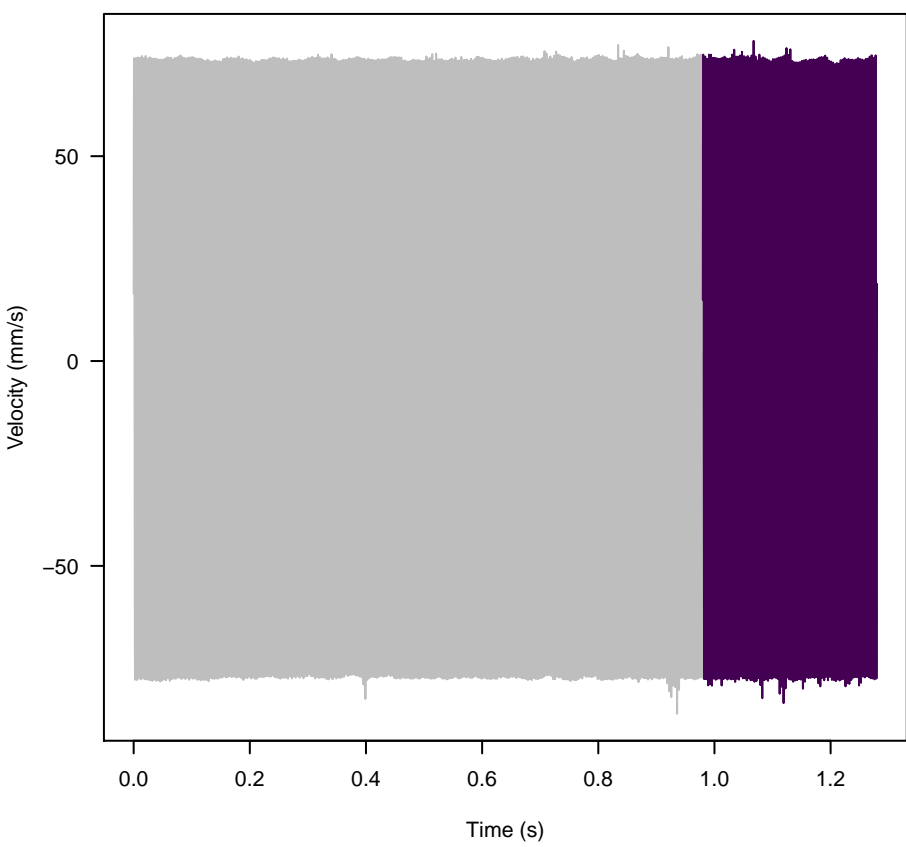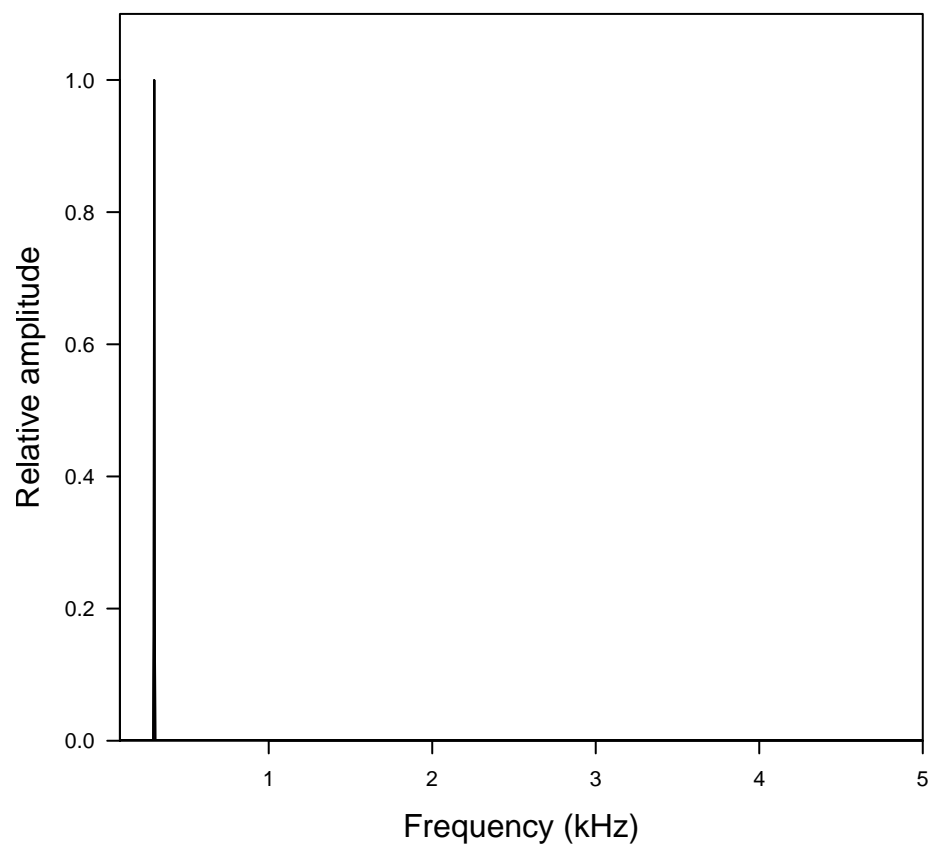

Vel. = 0.014 ; Str. = Receptacle ; Axis = z ; Fl. accession = 10-s-81-8

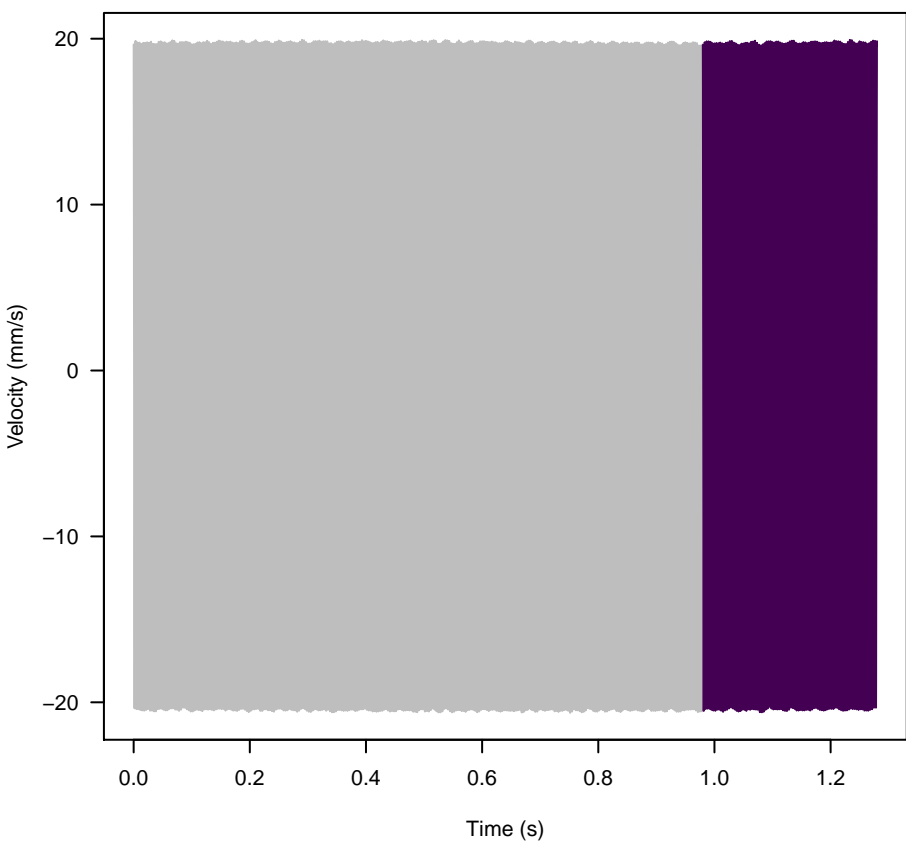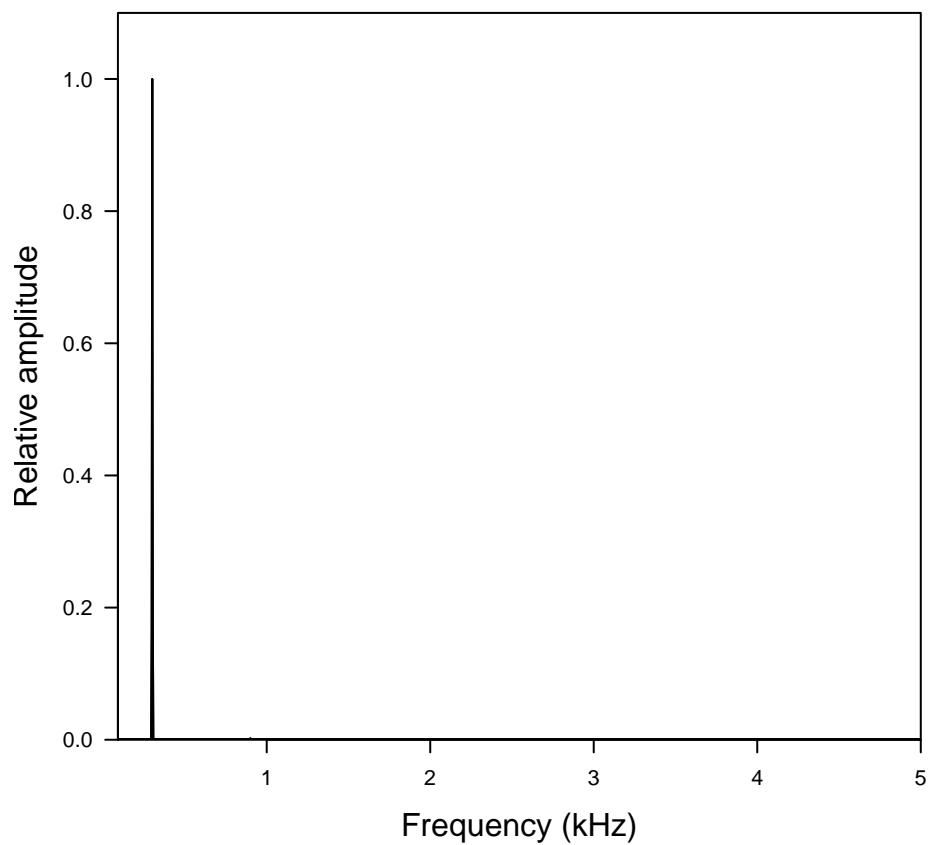

Vel. = 0.014 ; Str. = PA ; Axis = z ; Fl. accession = 10-s-81-8

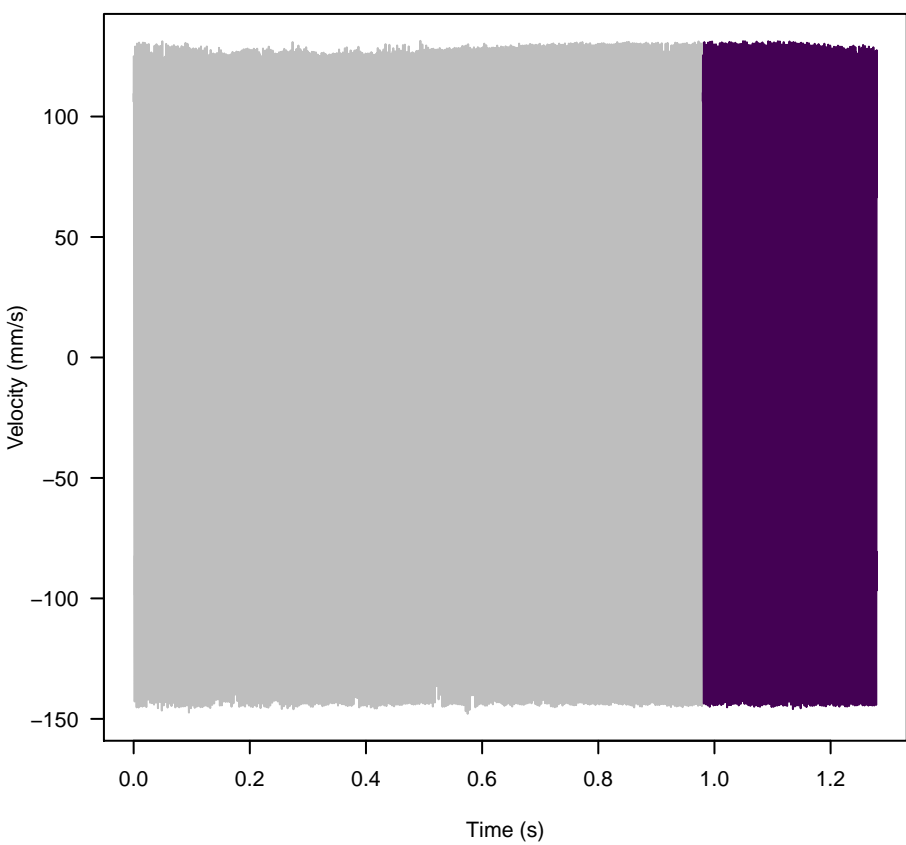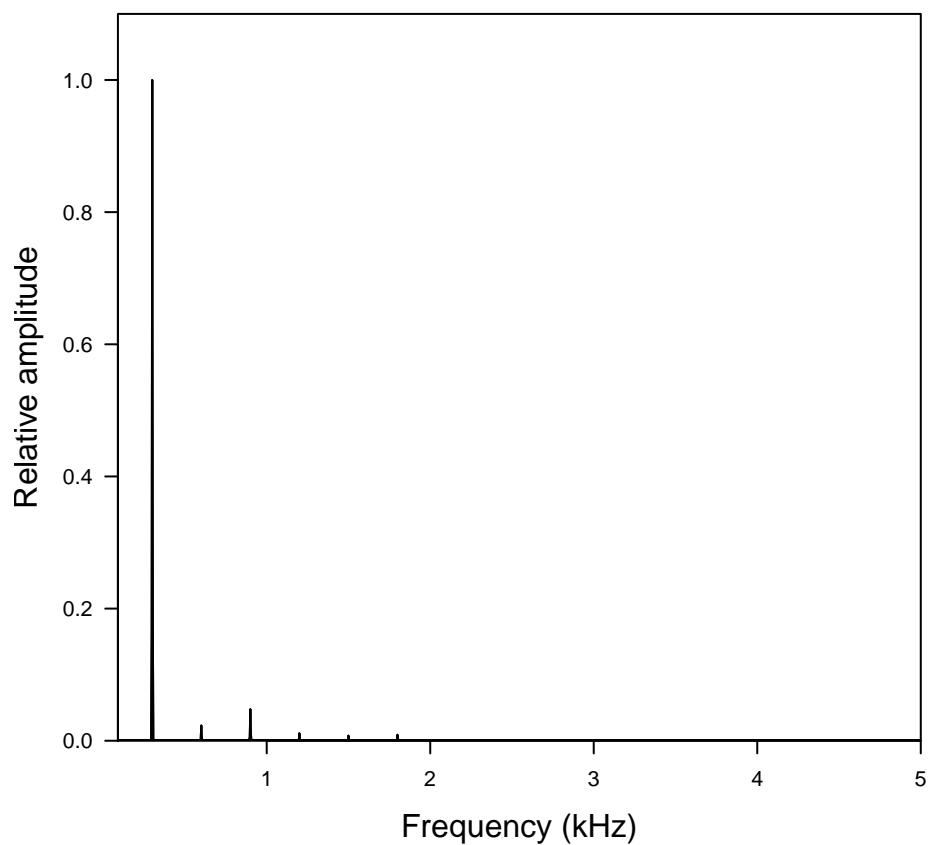

Vel. = 0.014 ; Str. = Receptacle ; Axis = z ; Fl. accession = 10-s-81-8

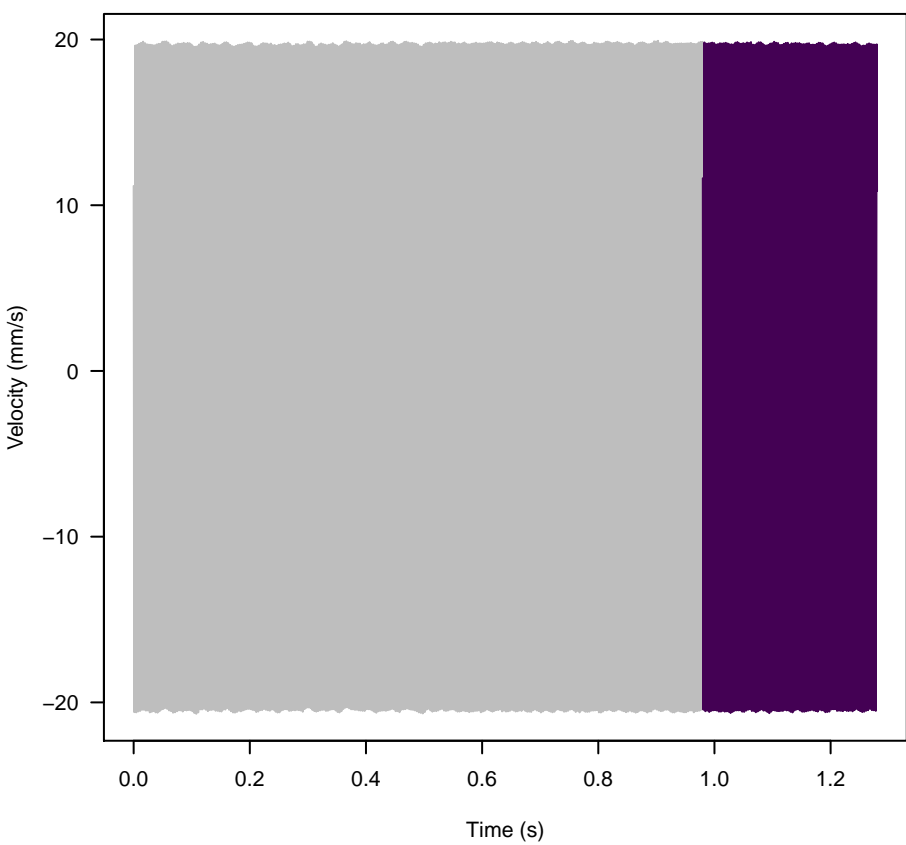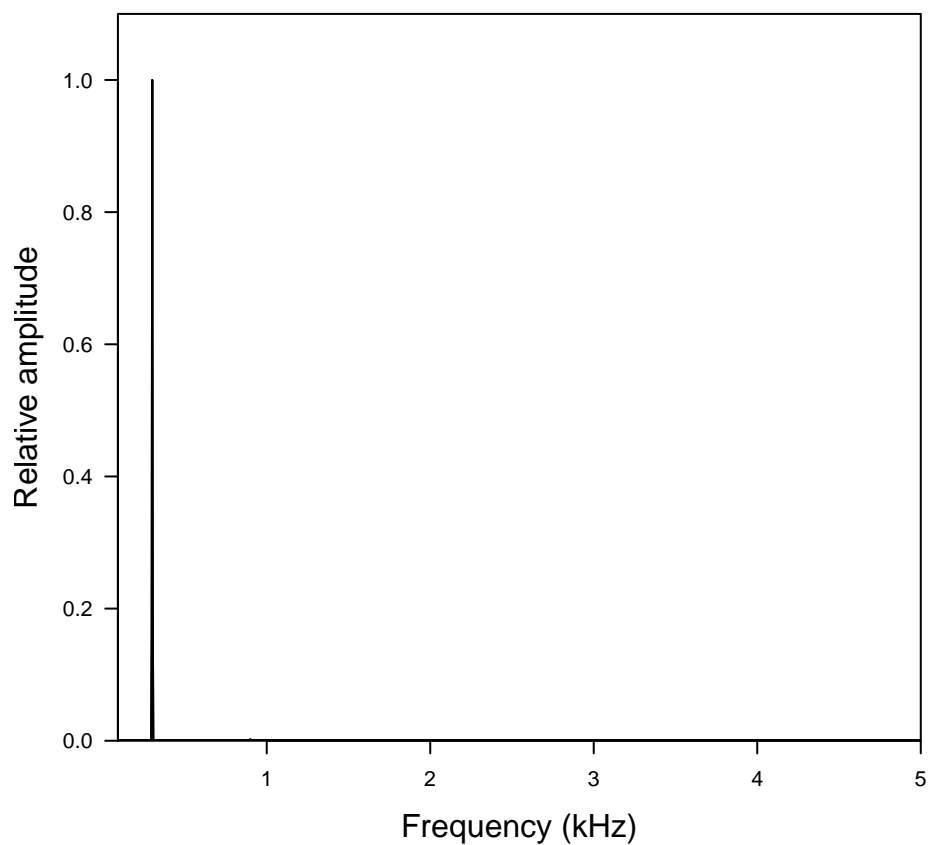



Vel. = 0.014 ; Str. = Corolla ; Axis = y ; Fl. accession = 10-s-81-8

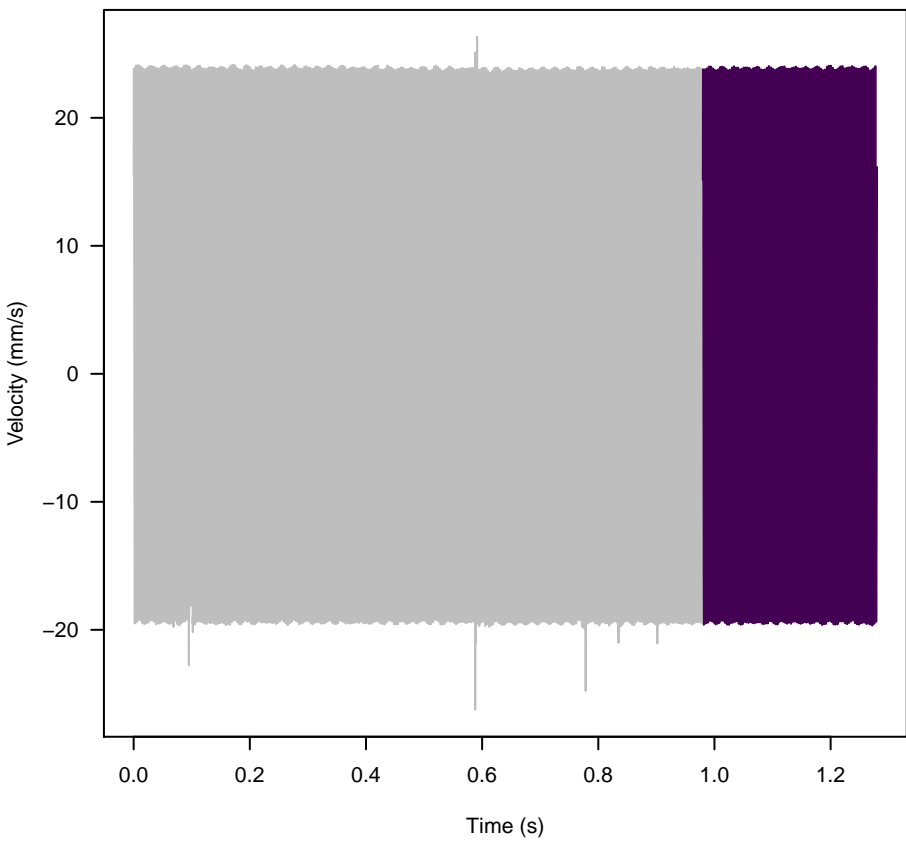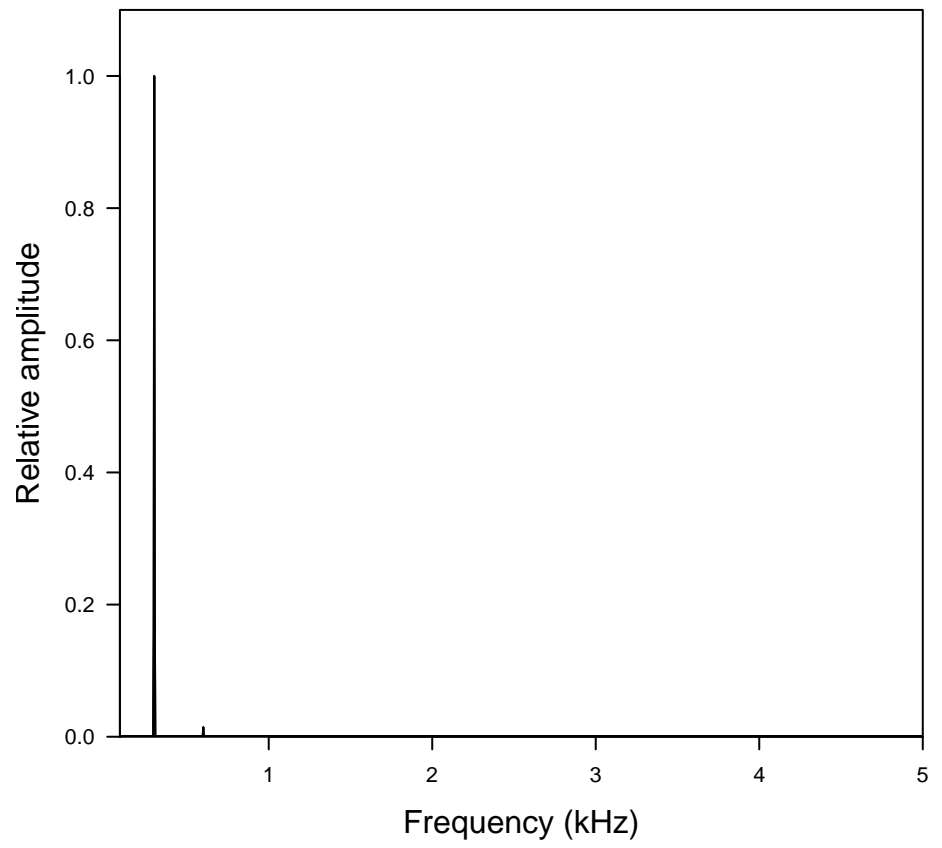

Vel. = 0.014 ; Str. = Receptacle ; Axis = y ; Fl. accession = 10-s-81-8

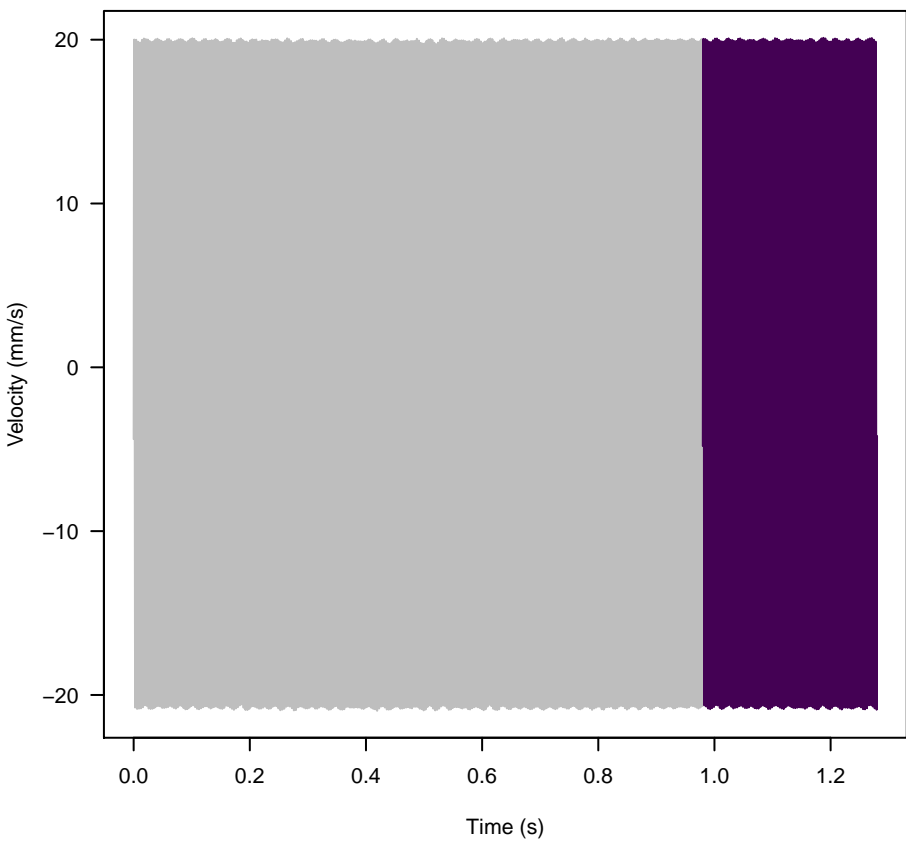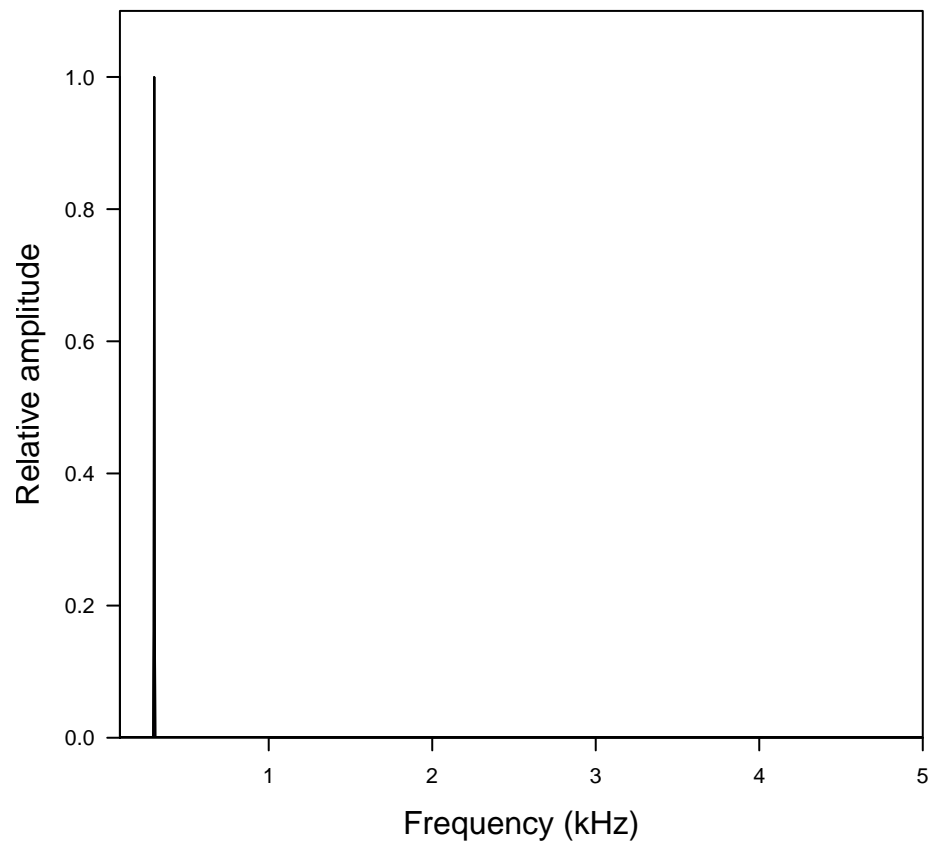

Vel. = 0.014 ; Str. = FA ; Axis = y ; Fl. accession = 10-s-81-8

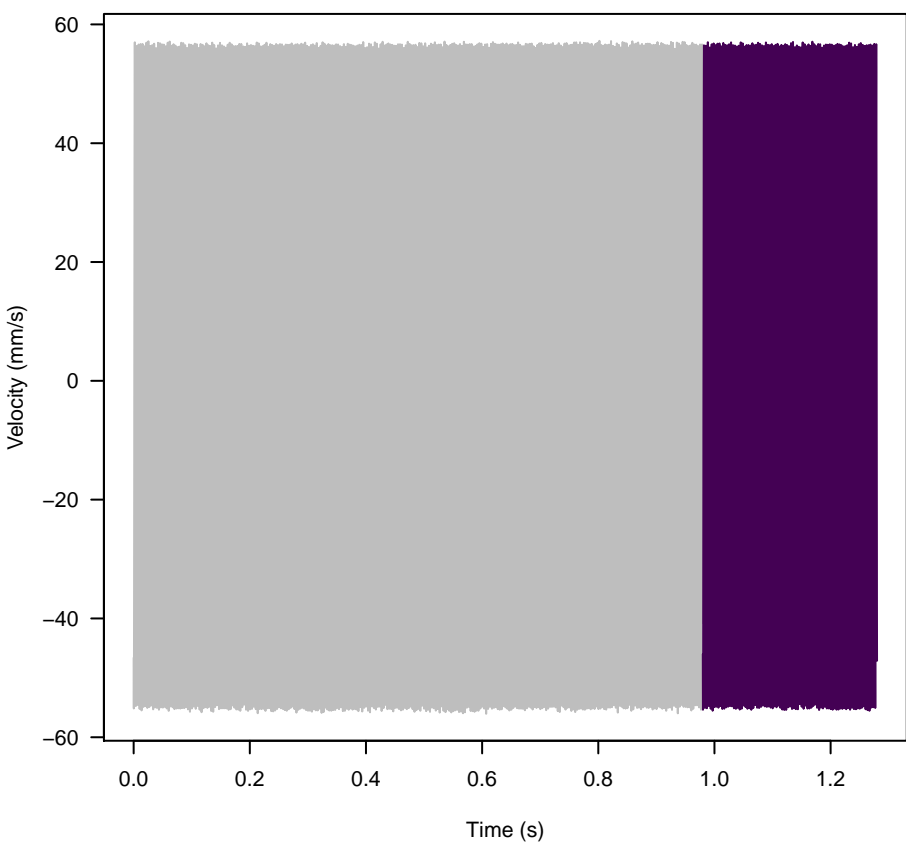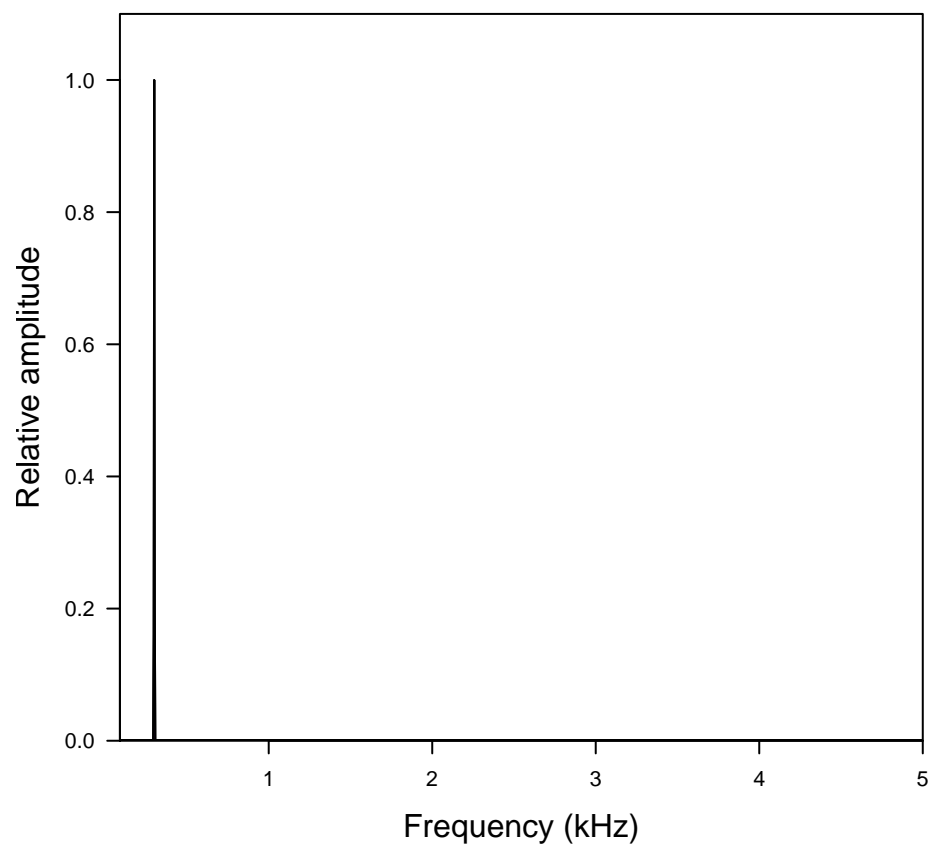

Vel. = 0.014 ; Str. = Receptacle ; Axis = y ; Fl. accession = 10-s-81-8

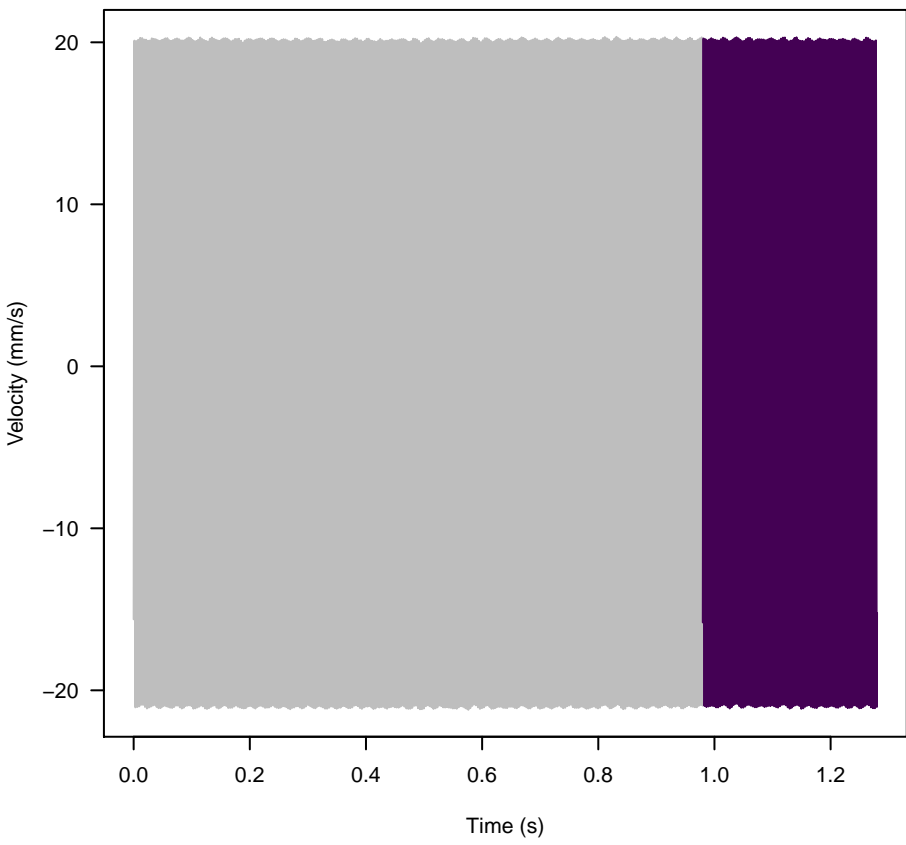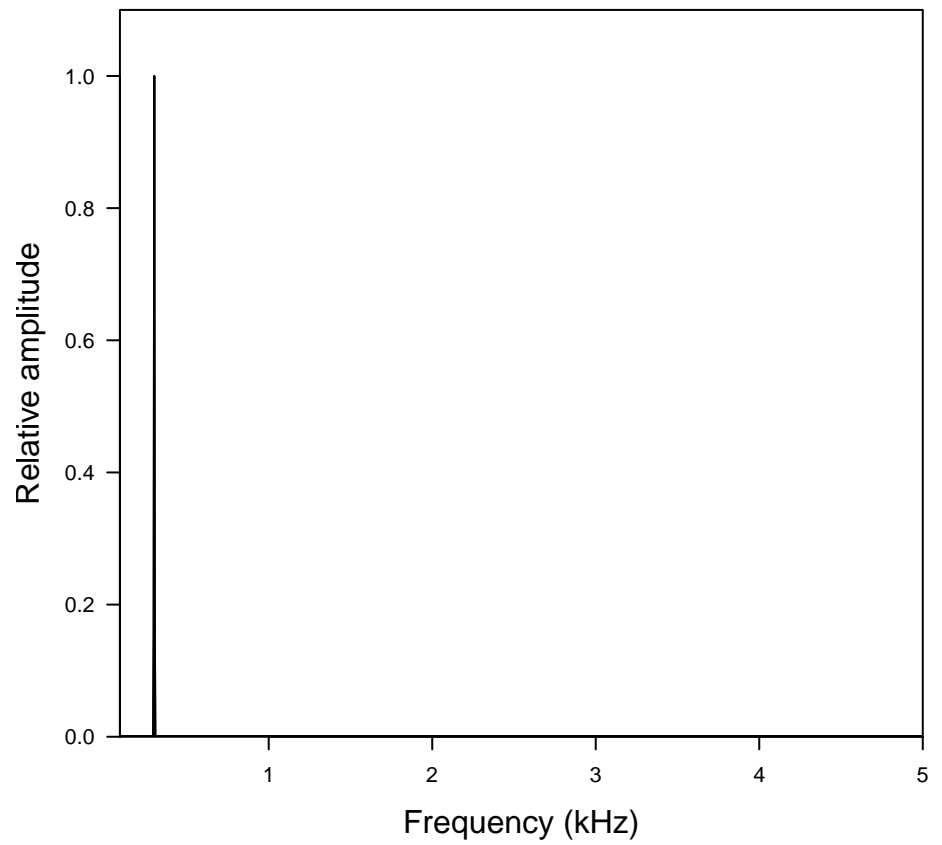

Vel. = 0.014 ; Str. = PA ; Axis = y ; Fl. accession = 10-s-81-8

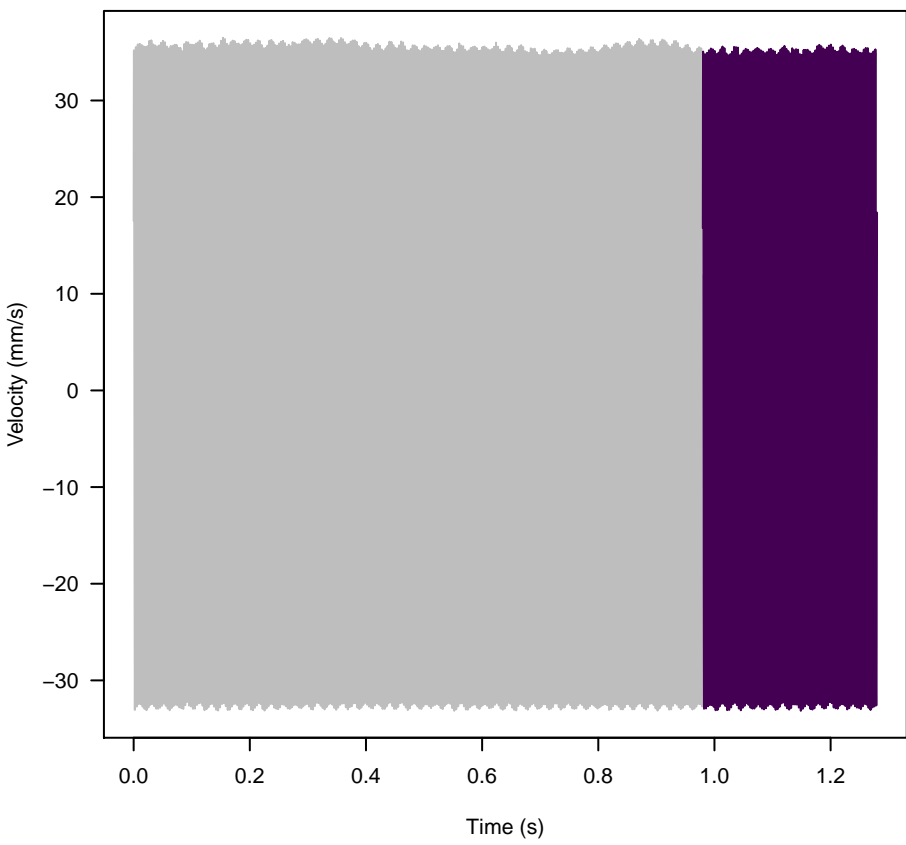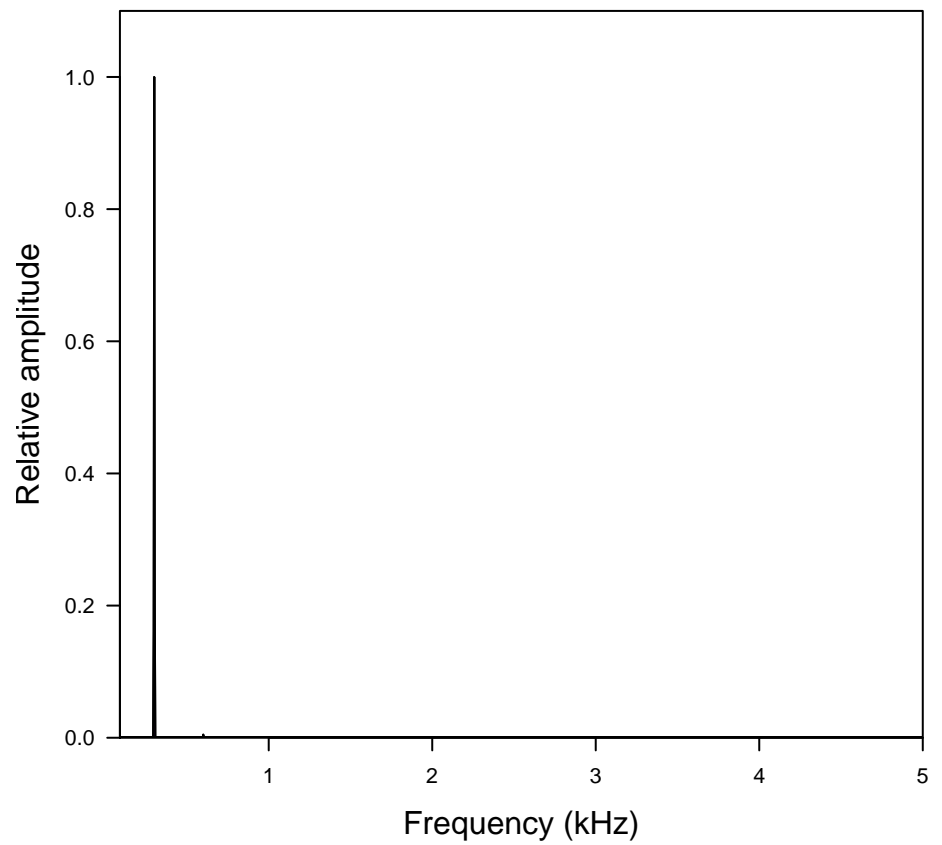

Vel. = 0.014 ; Str. = Receptacle ; Axis = y ; Fl. accession = 10-s-81-8

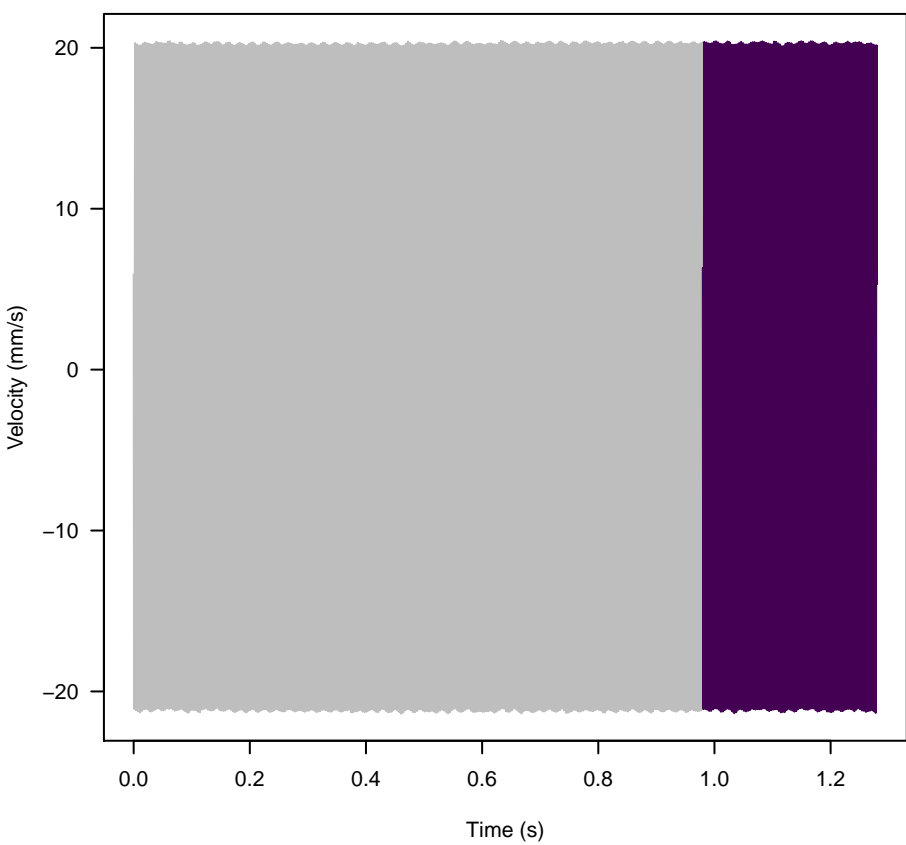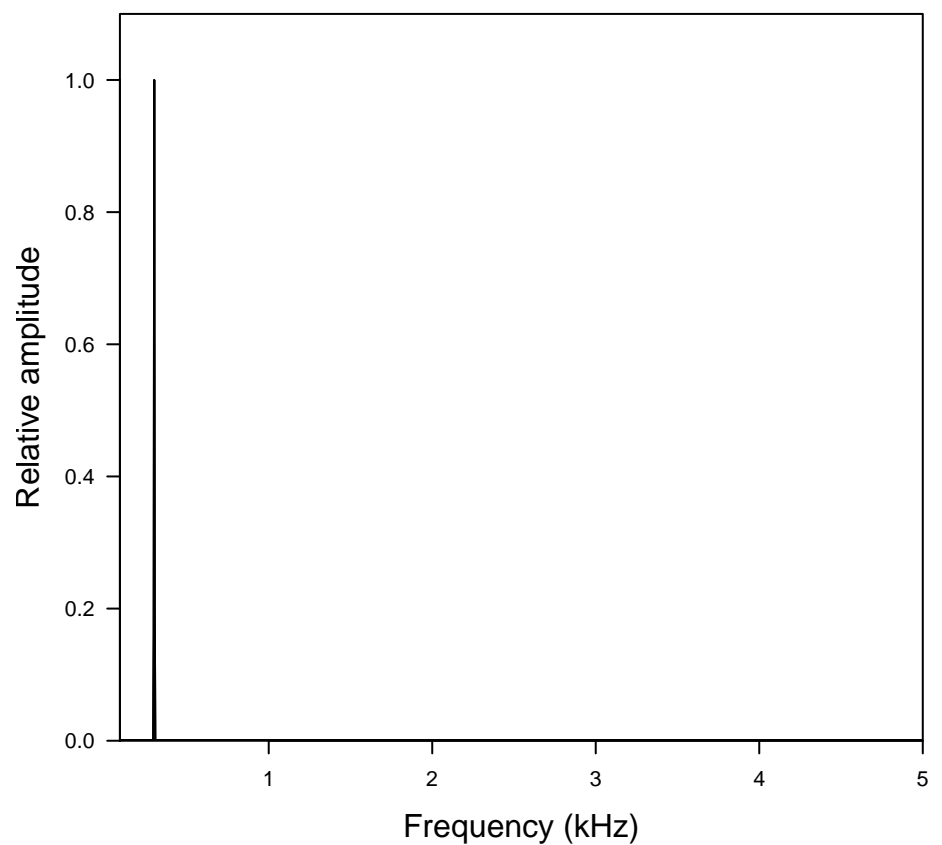

Vel. = 0.028 ; Str. = PA ; Axis = y ; Fl. accession = 10-s-81-8

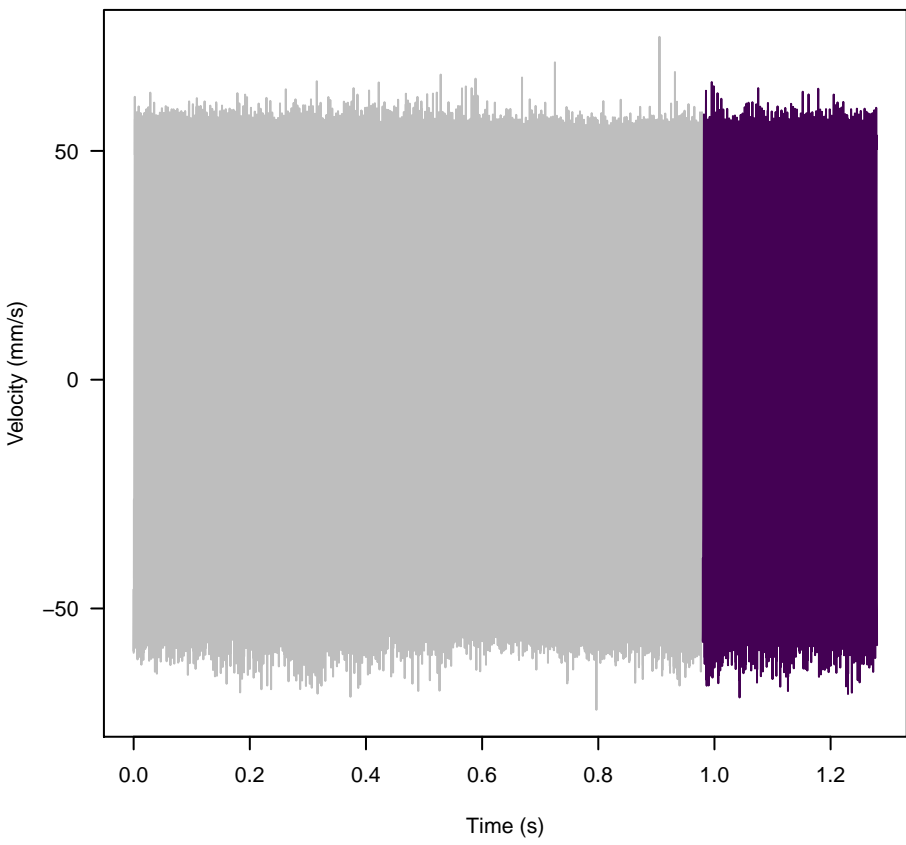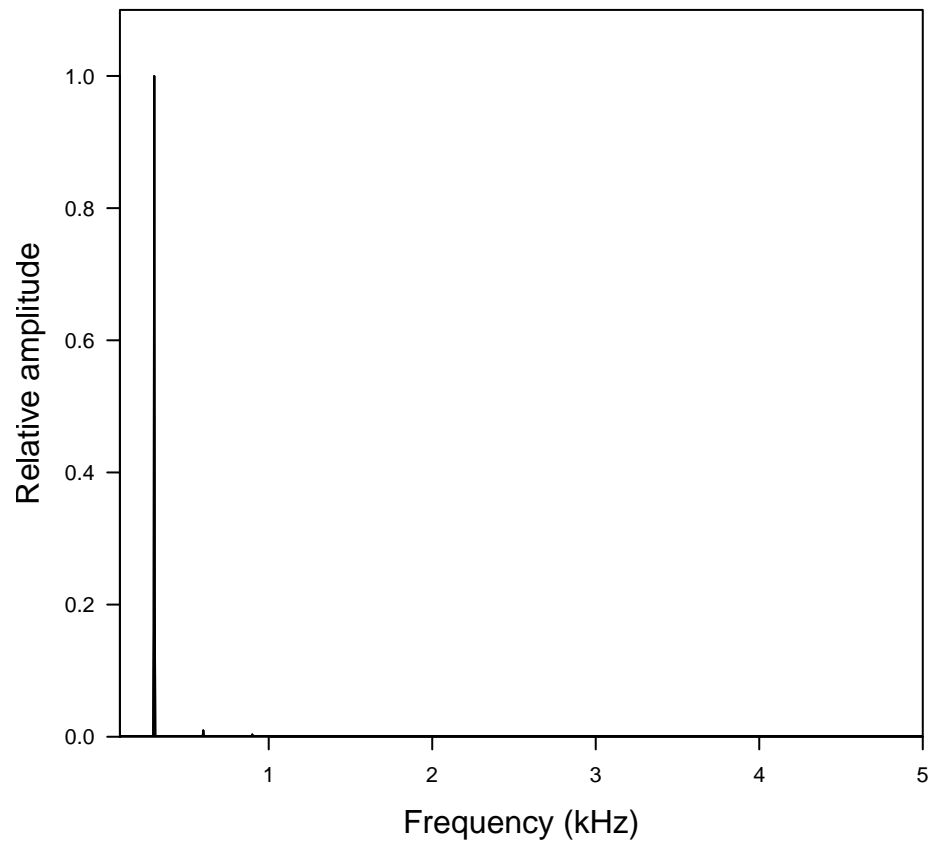

Vel. = 0.028 ; Str. = Receptacle ; Axis = y ; Fl. accession = 10-s-81-8

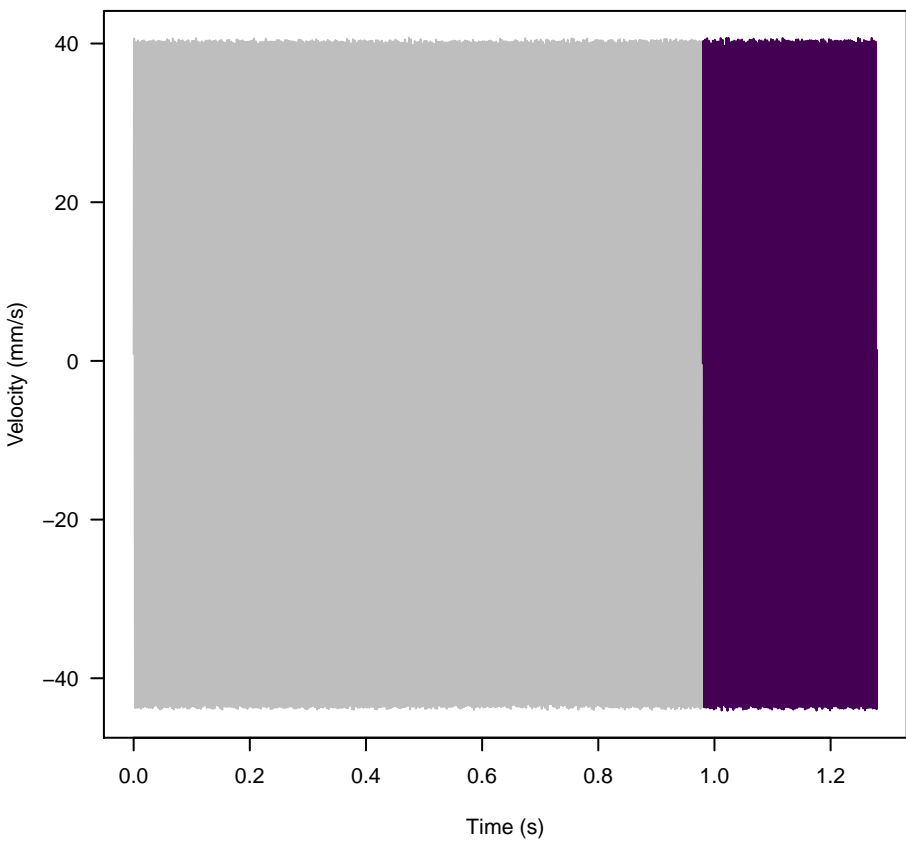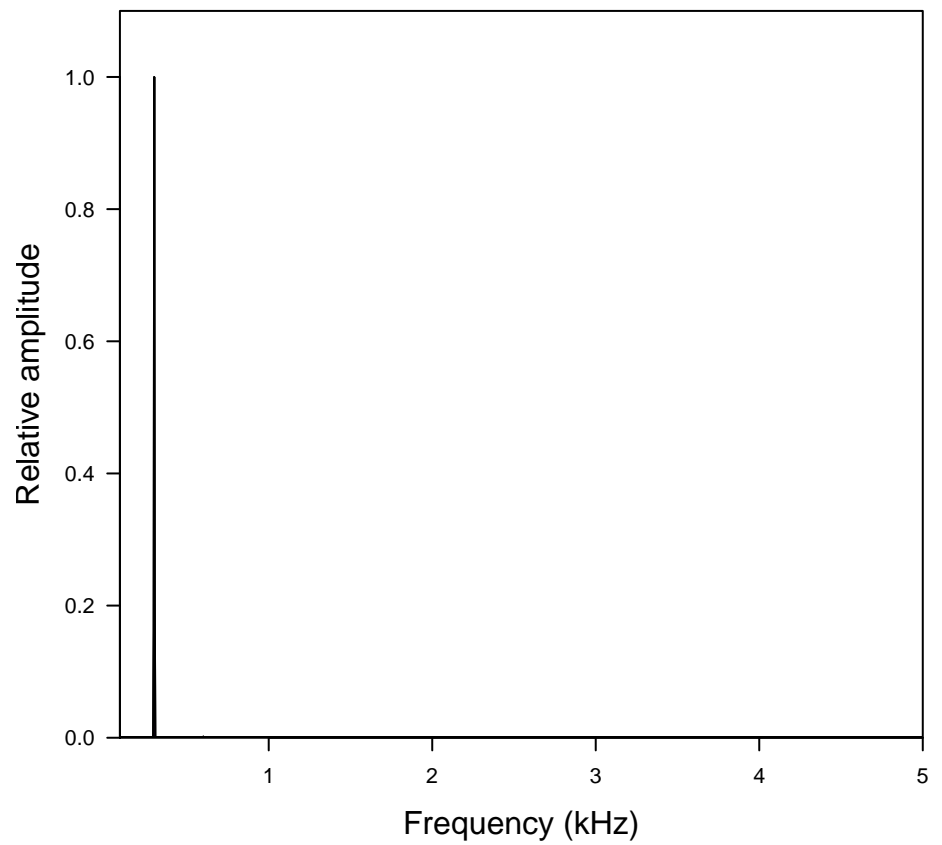

Vel. = 0.028 ; Str. = FA ; Axis = y ; Fl. accession = 10-s-81-8

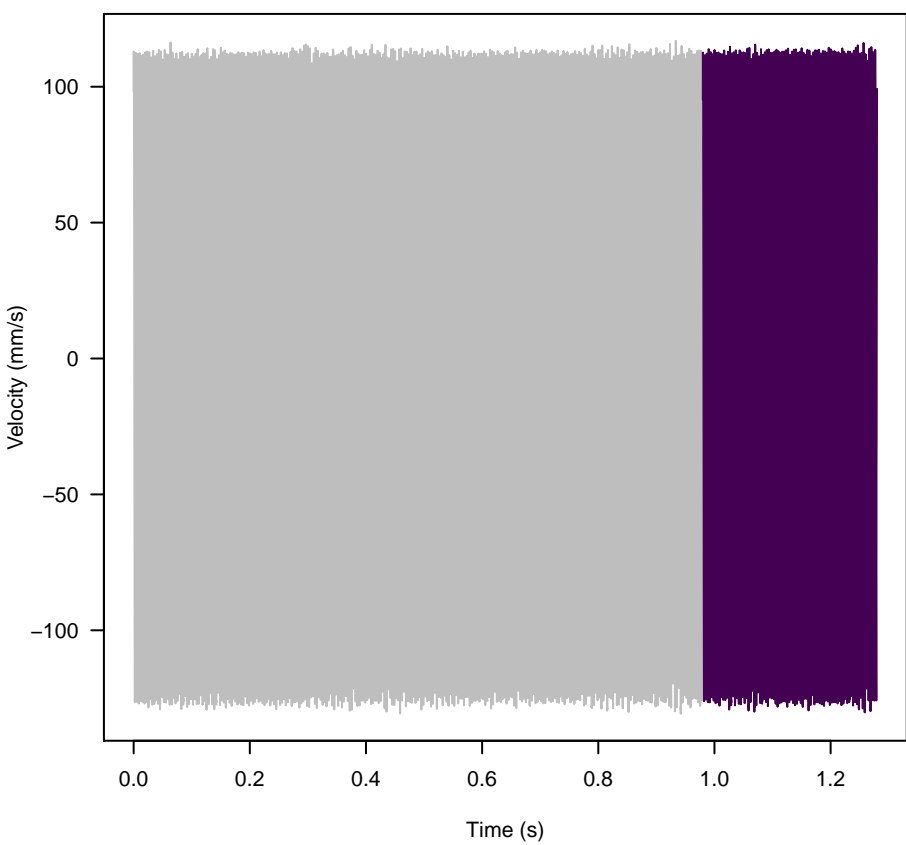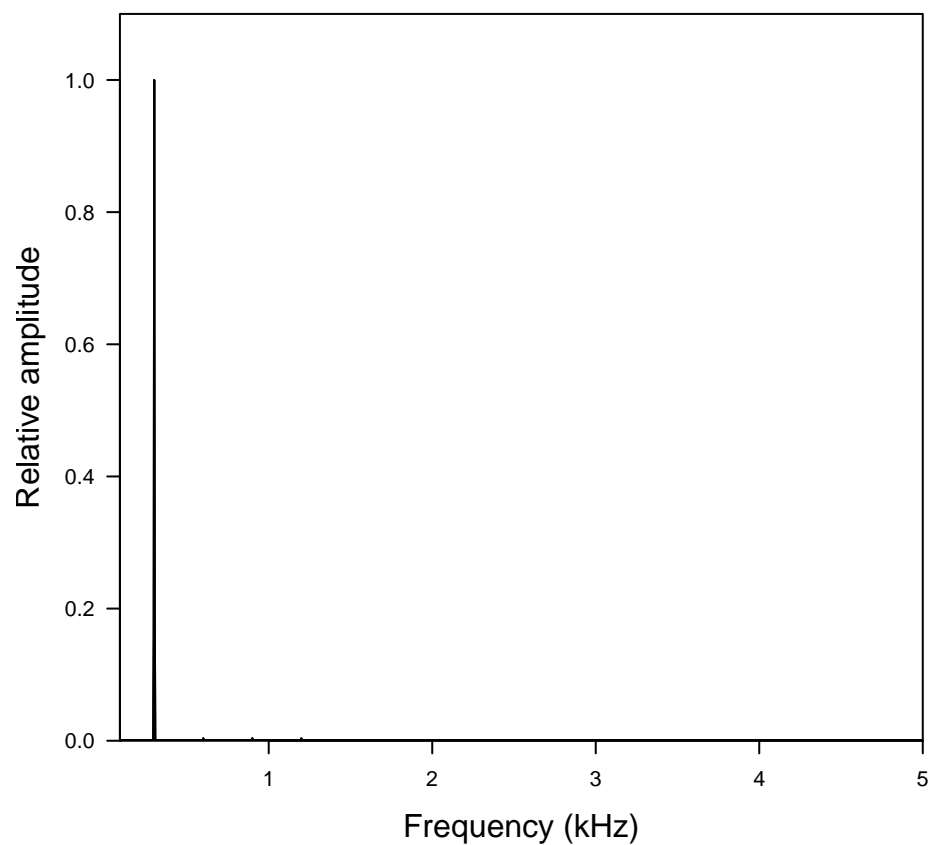

Vel. = 0.028 ; Str. = Receptacle ; Axis = y ; Fl. accession = 10-s-81-8

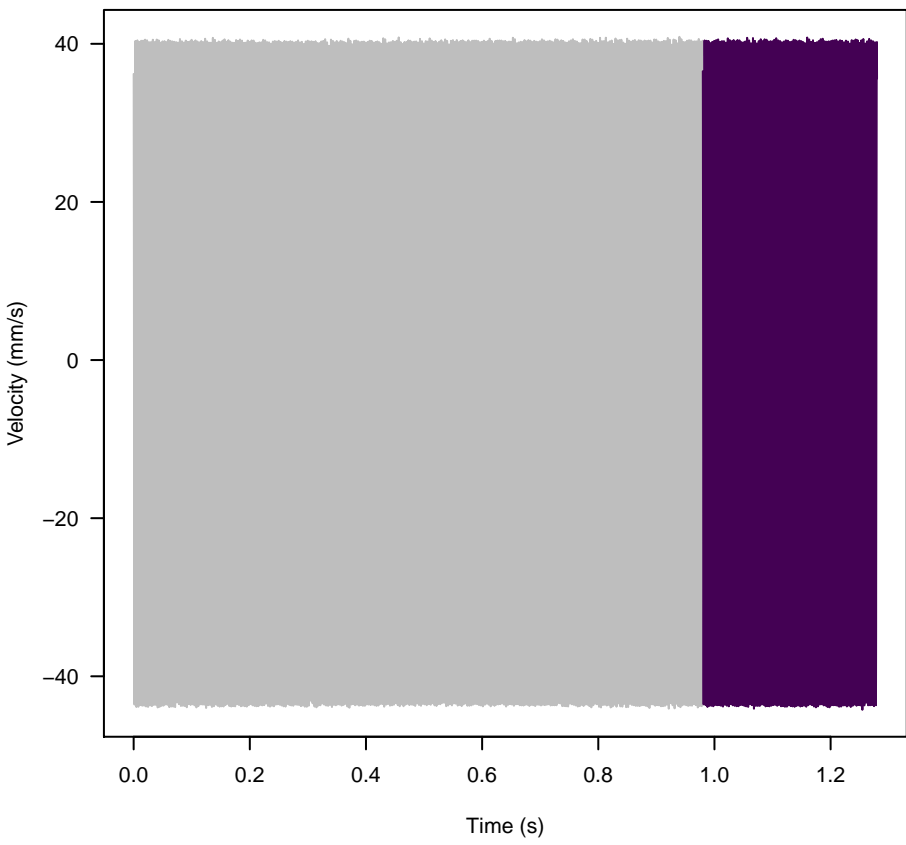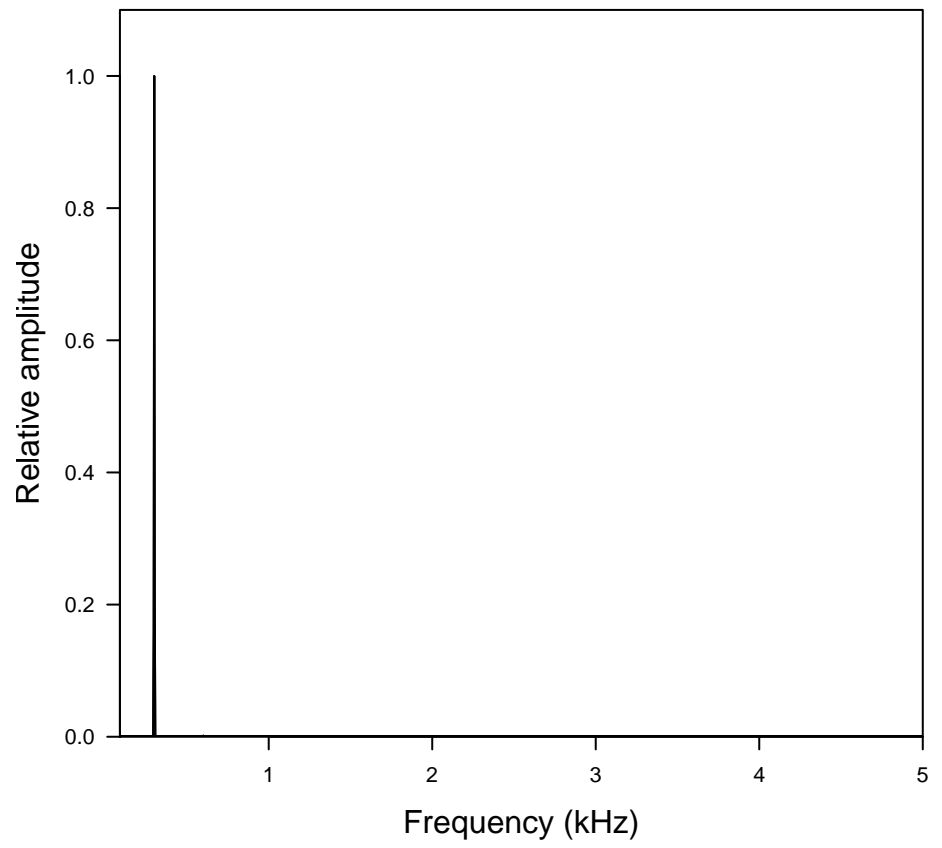

Vel. = 0.028 ; Str. = Corolla ; Axis = y ; Fl. accession = 10-s-81-8

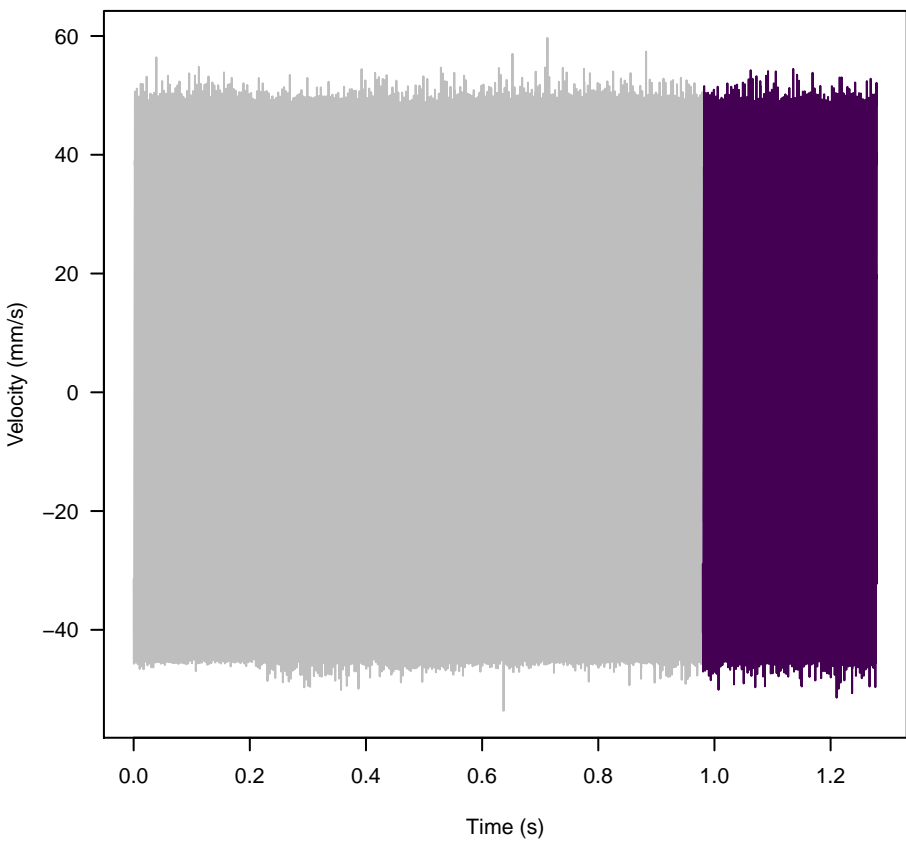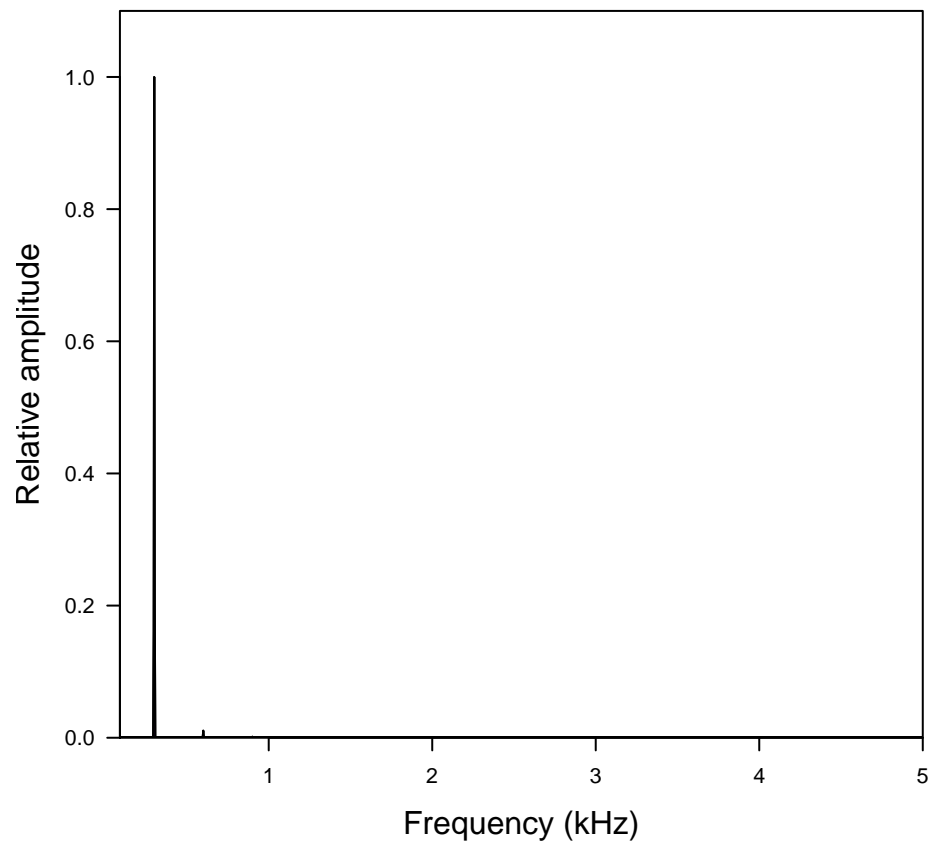

Vel. = 0.028 ; Str. = Receptacle ; Axis = y ; Fl. accession = 10-s-81-8

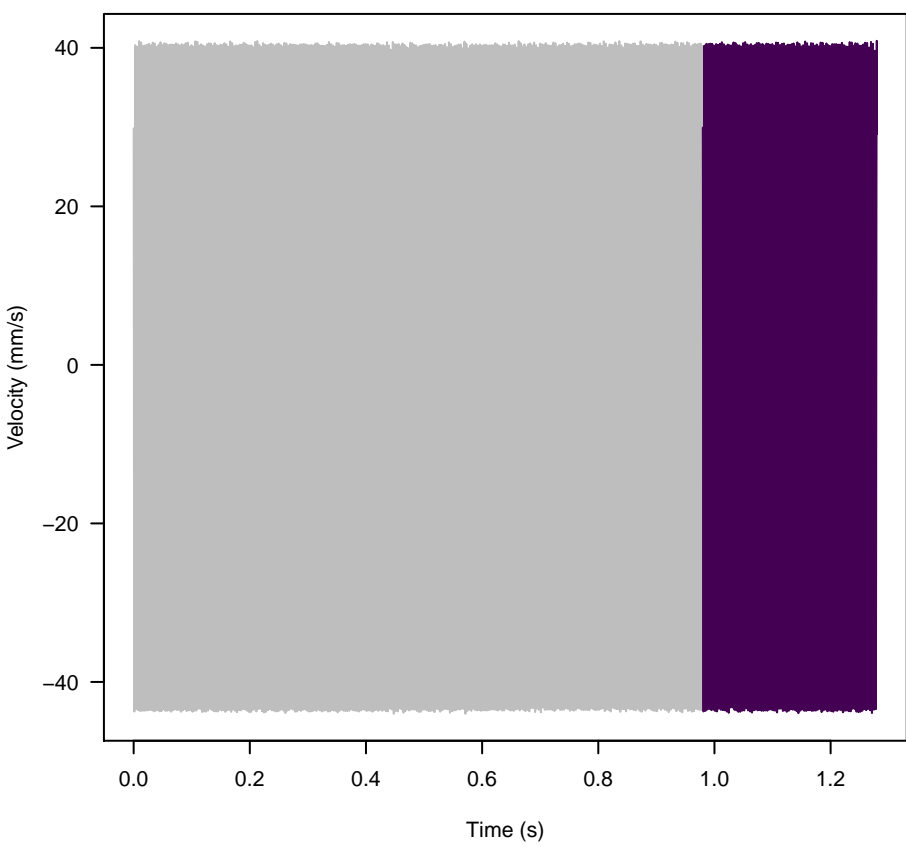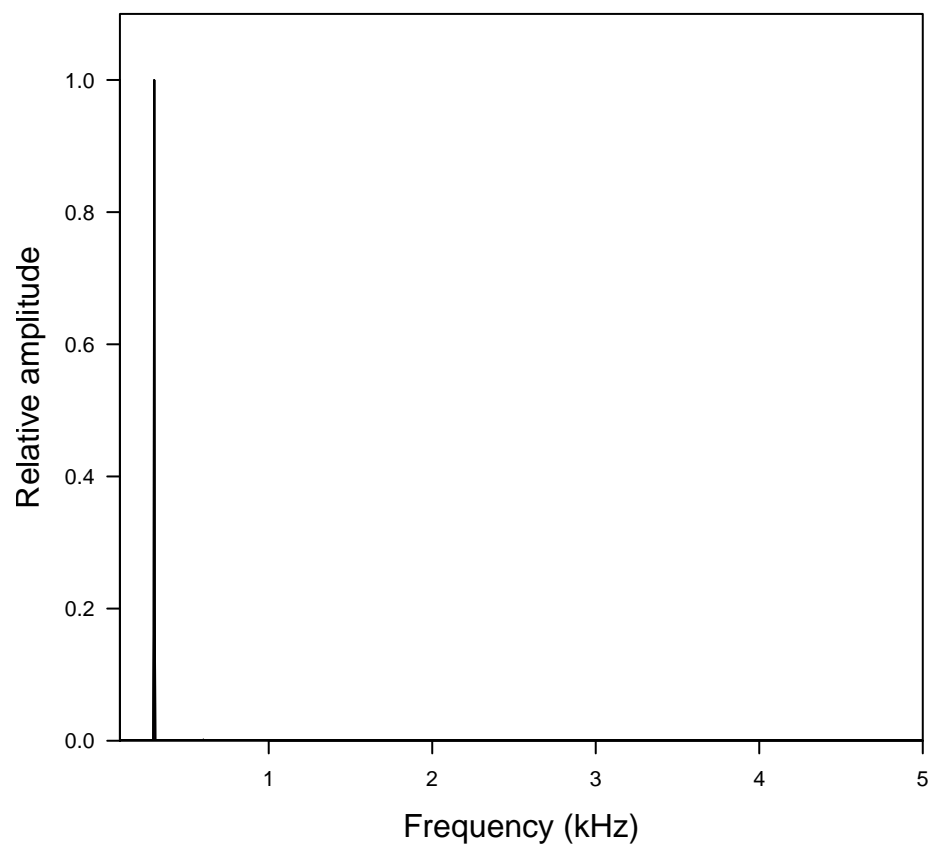

Vel. = 0.057 ; Str. = Corolla ; Axis = y ; Fl. accession = 10-s-81-8

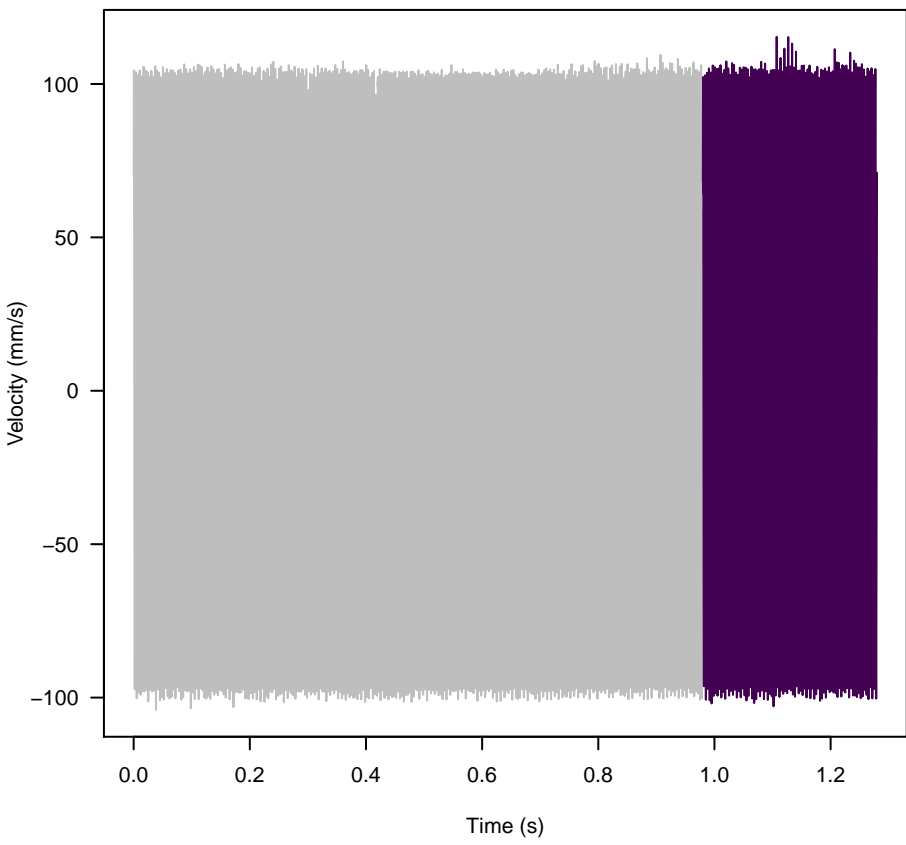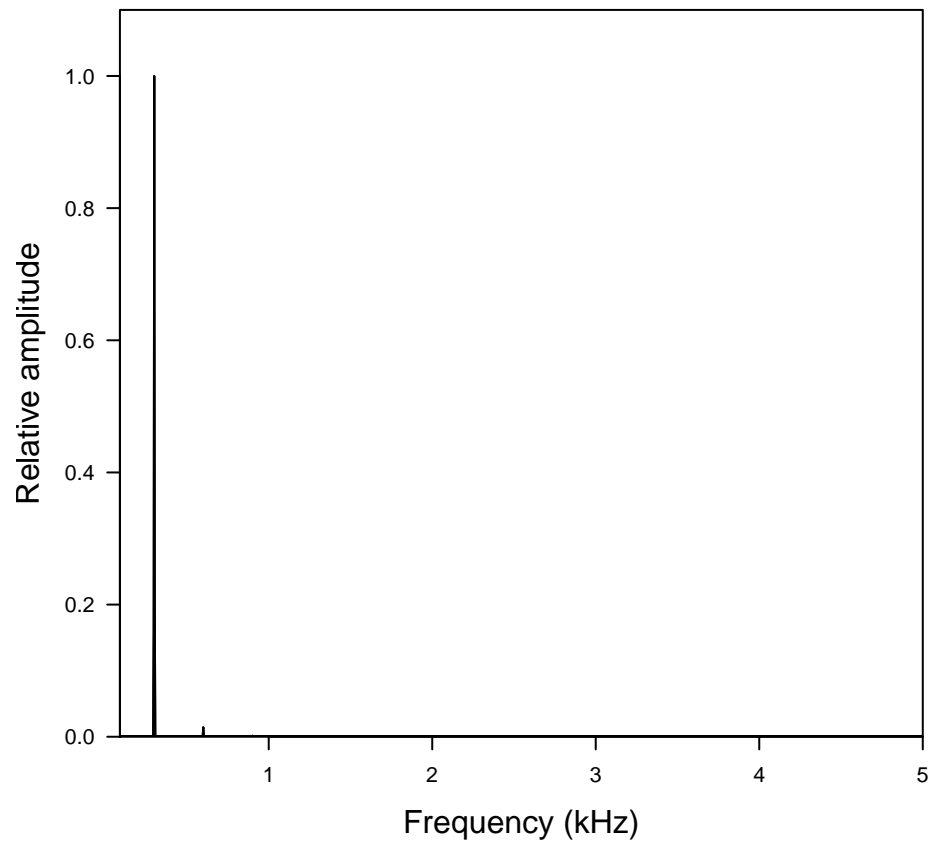

Vel. = 0.057 ; Str. = Receptacle ; Axis = y ; Fl. accession = 10-s-81-8

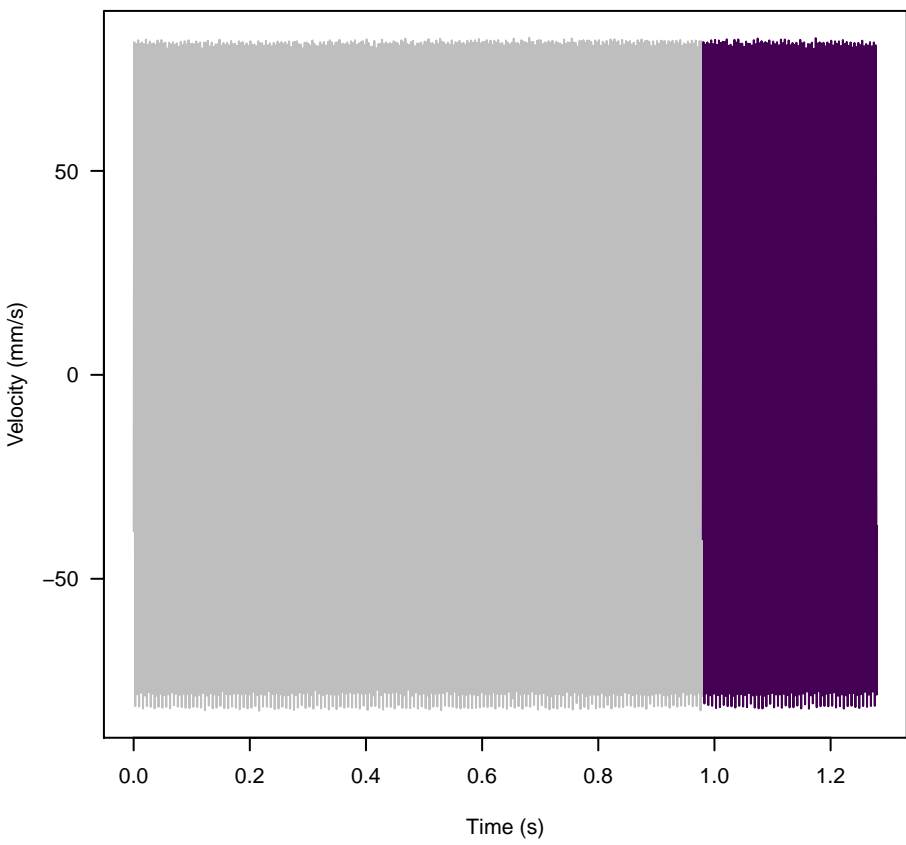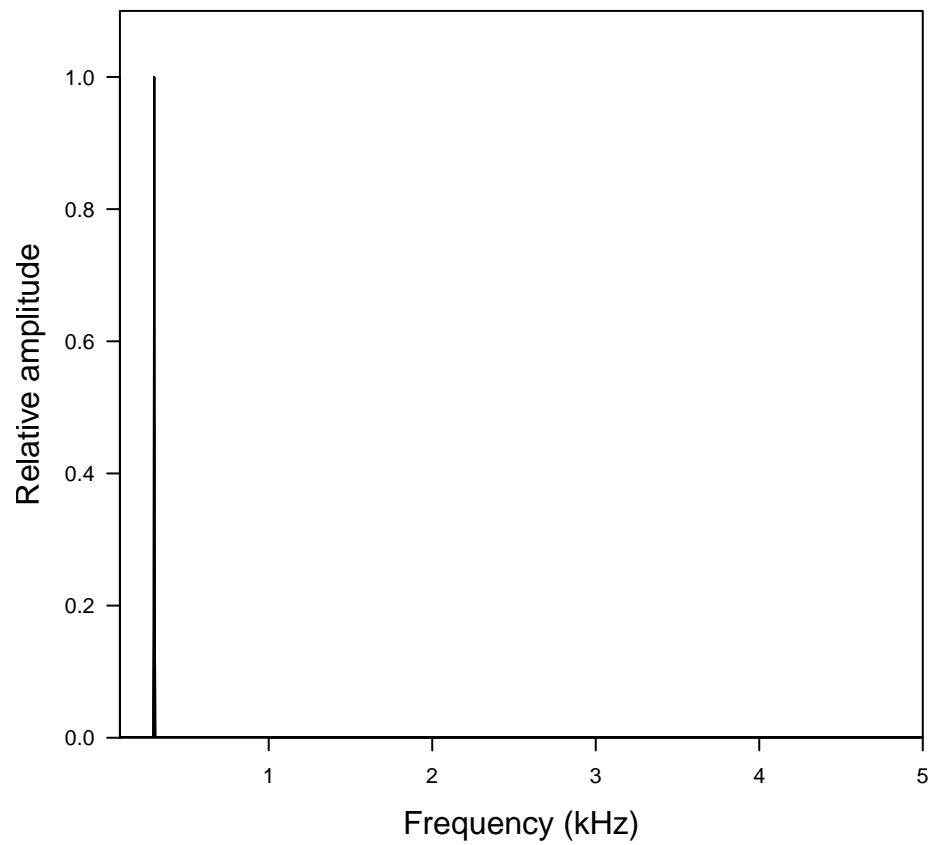

Vel. = 0.057 ; Str. = FA ; Axis = y ; Fl. accession = 10-s-81-8

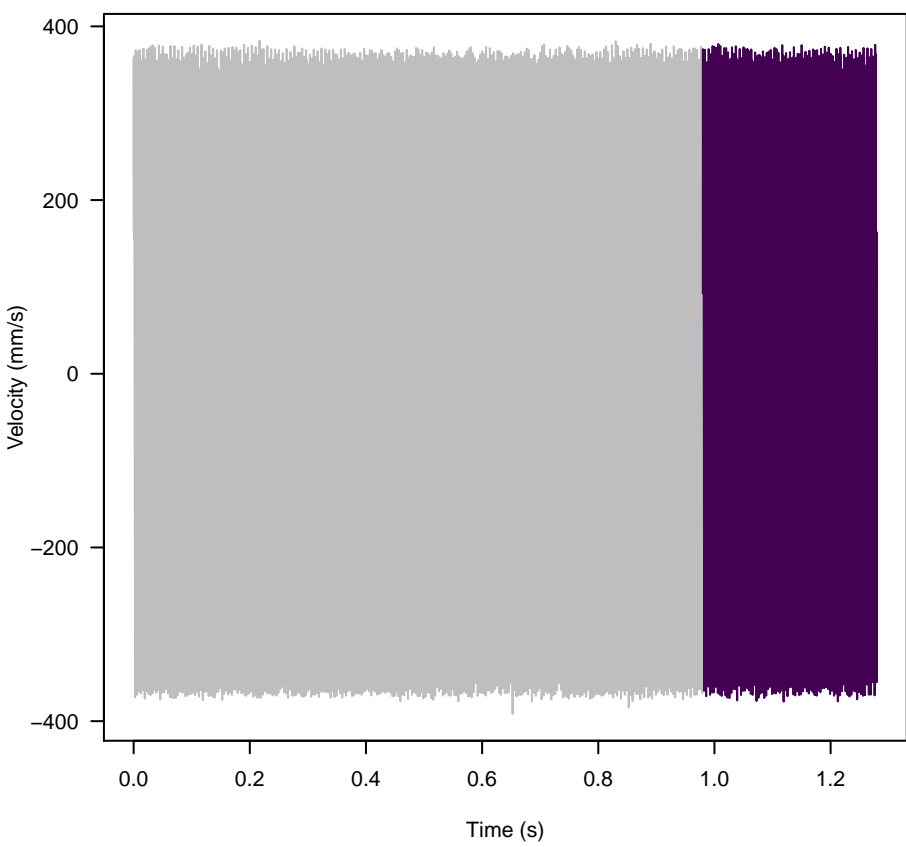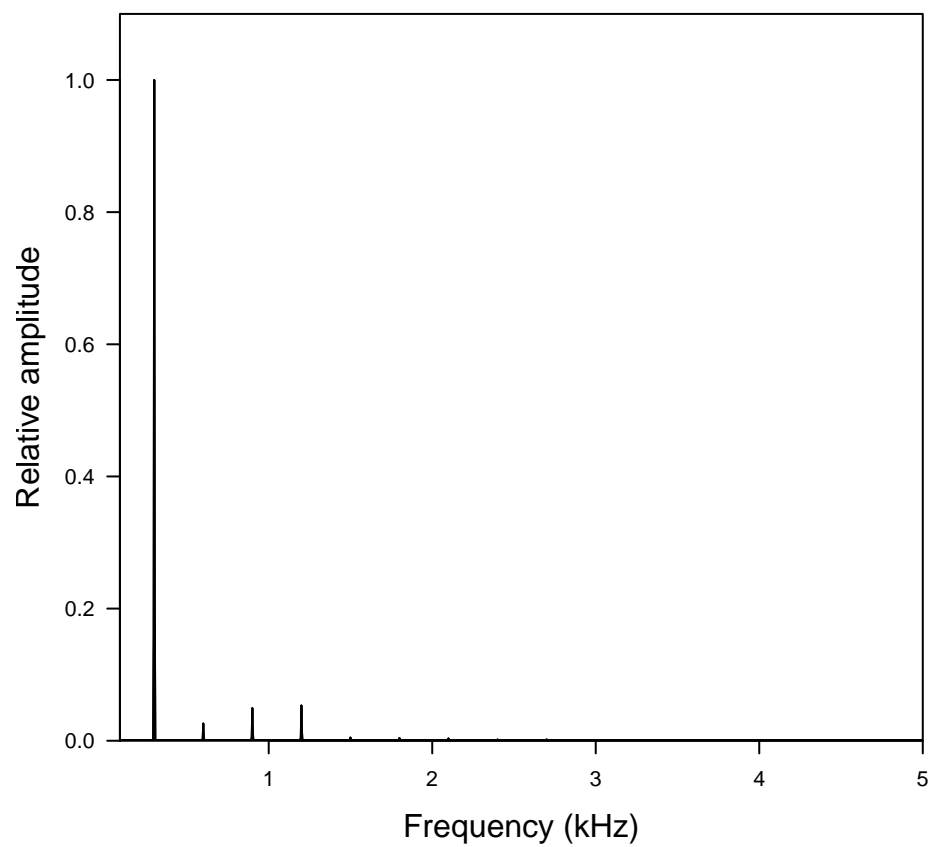

Vel. = 0.057 ; Str. = Receptacle ; Axis = y ; Fl. accession = 10-s-81-8

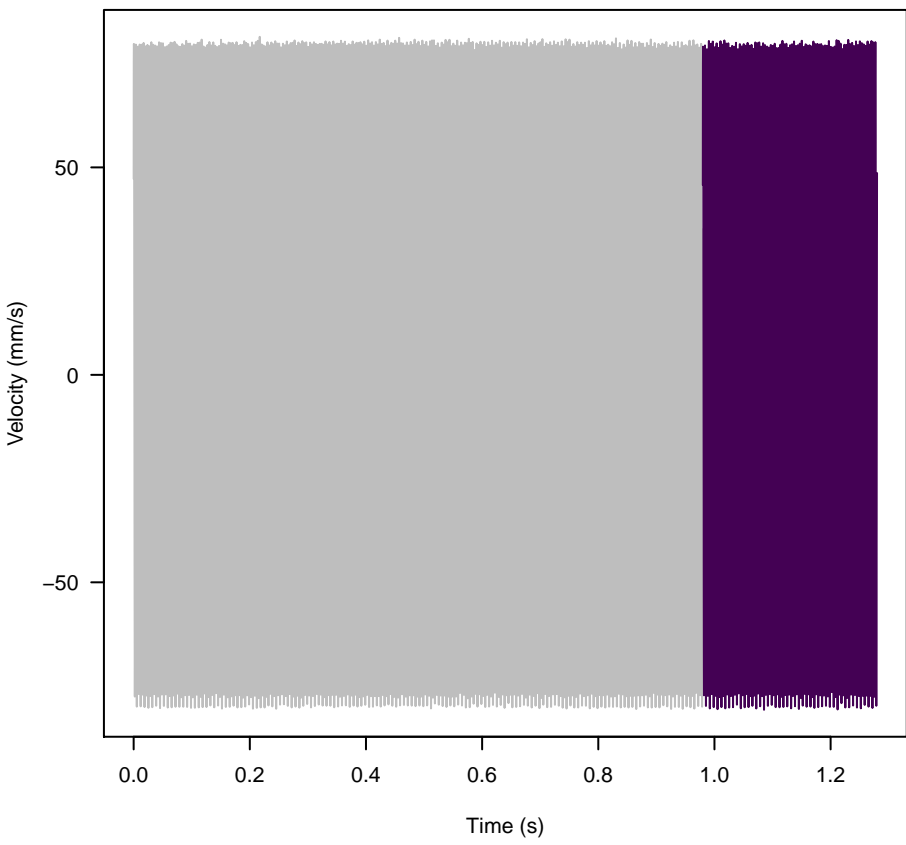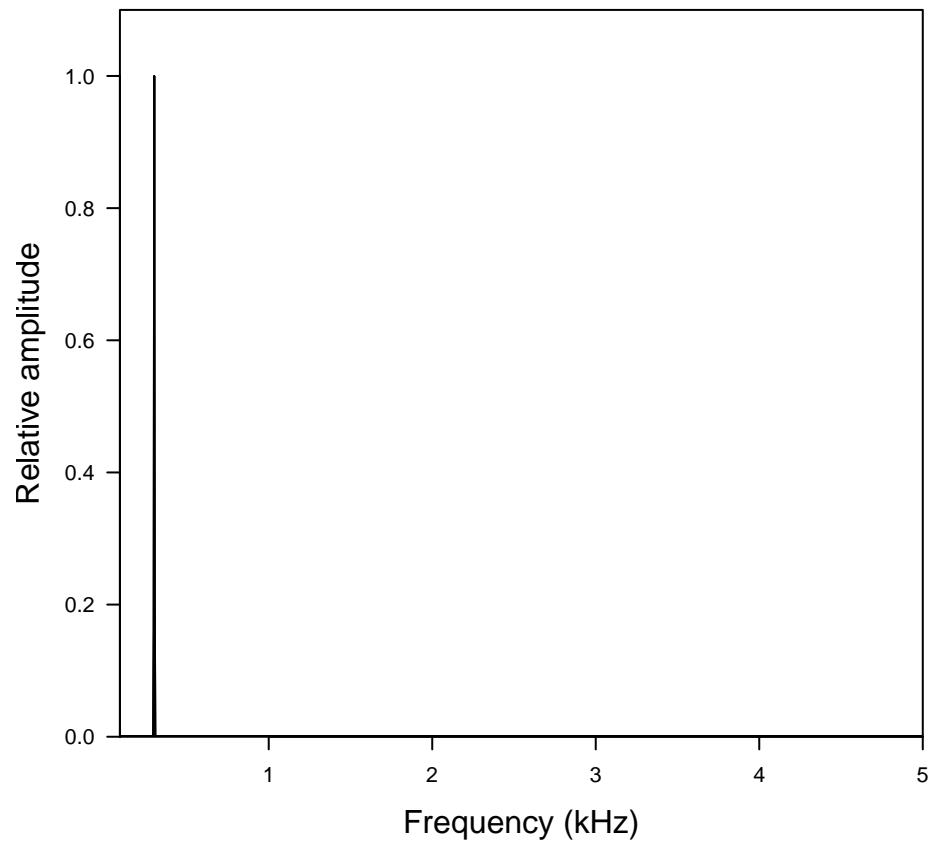

Vel. = 0.057 ; Str. = PA ; Axis = y ; Fl. accession = 10-s-81-8

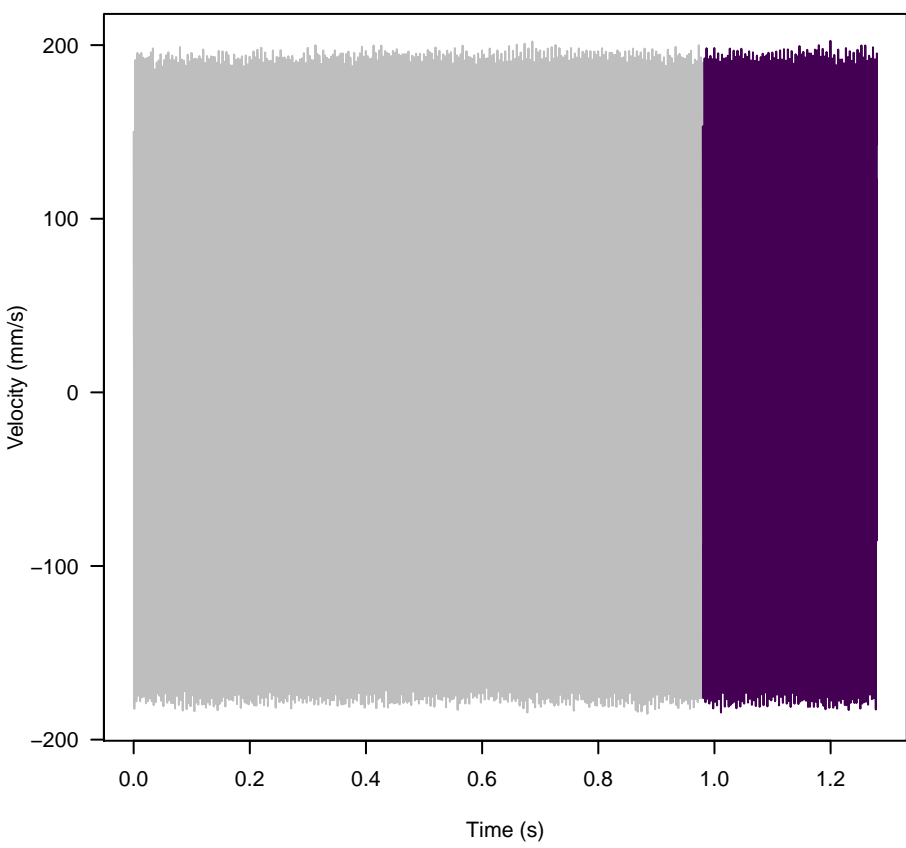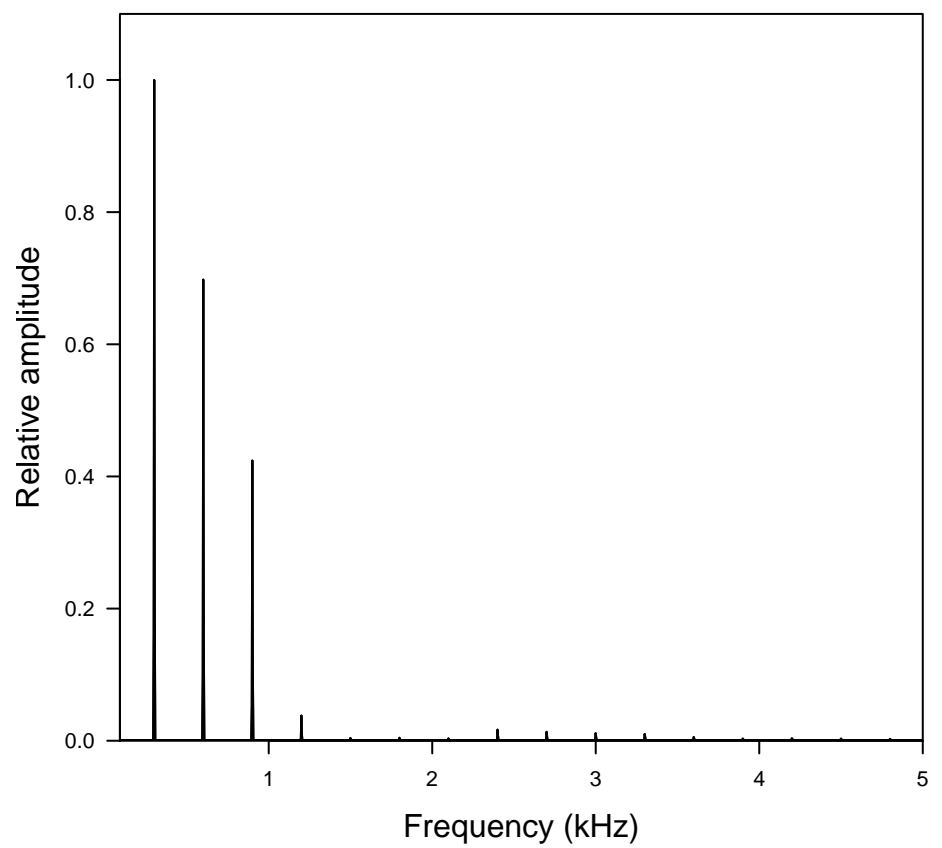

Vel. = 0.057 ; Str. = Receptacle ; Axis = y ; Fl. accession = 10-s-81-8

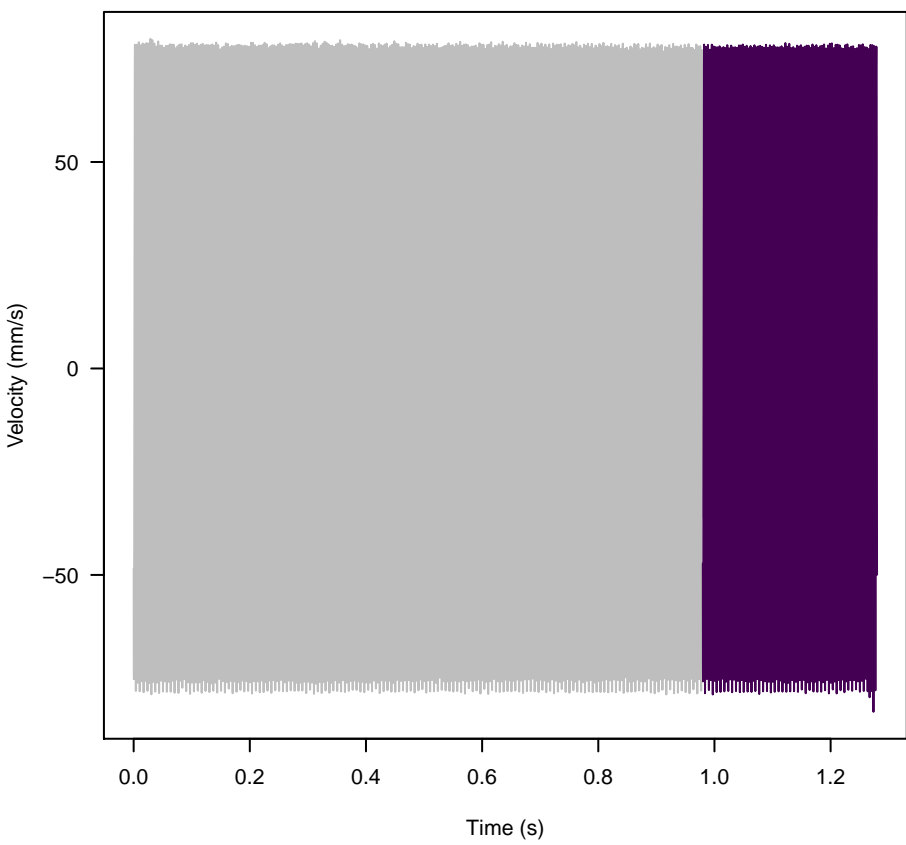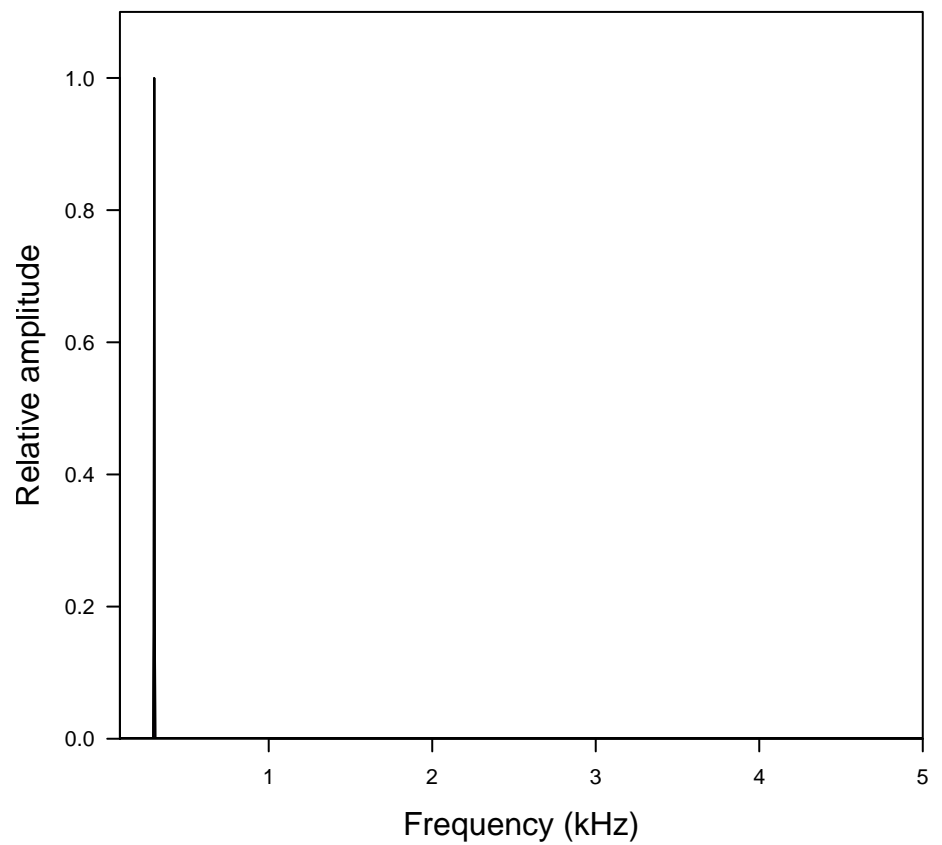

Vel. = 0.057 ; Str. = Corolla ; Axis = y ; Fl. accession = 10-s-79-2

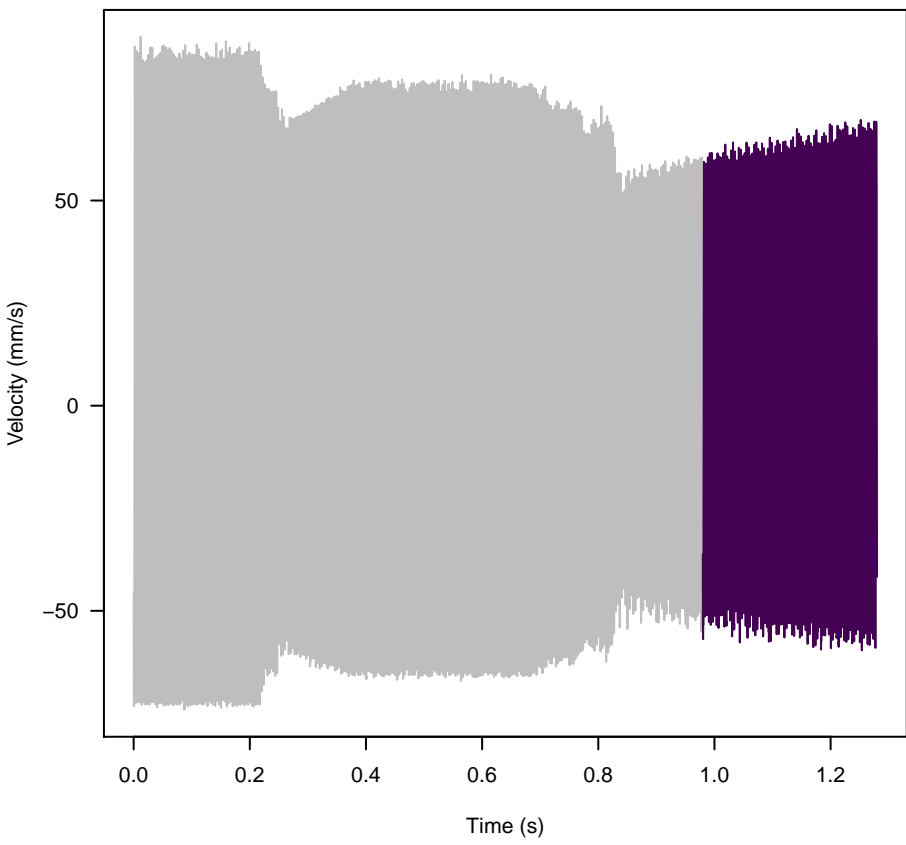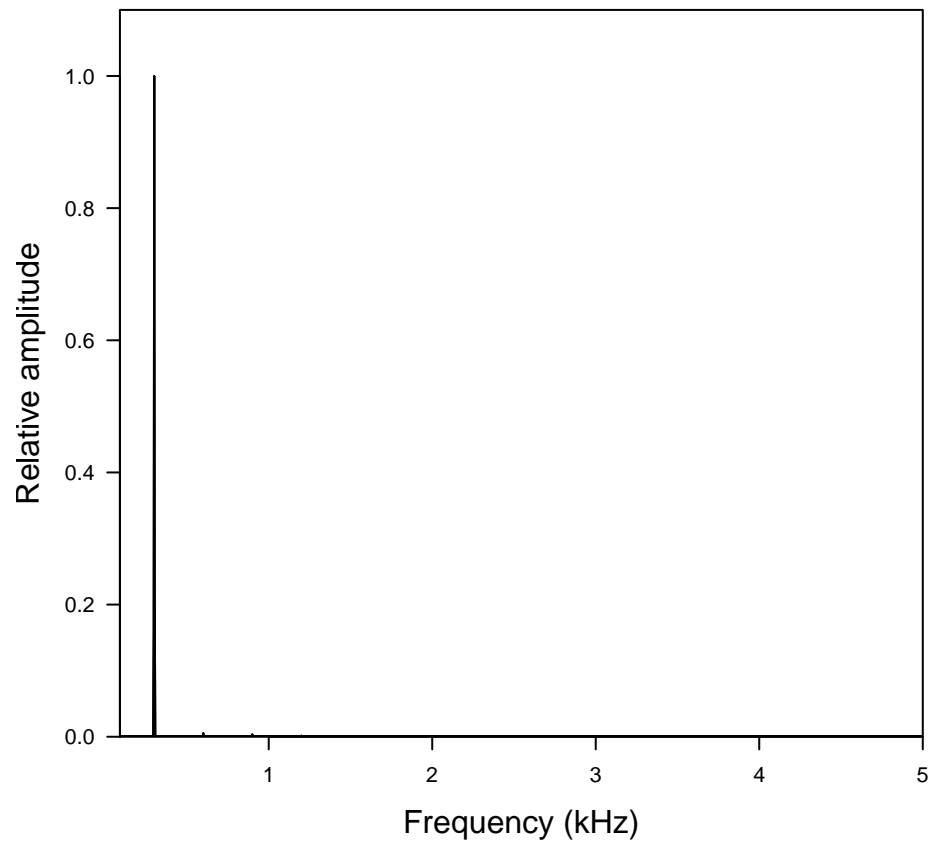

Vel. = 0.057 ; Str. = Receptacle ; Axis = y ; Fl. accession = 10-s-79-2

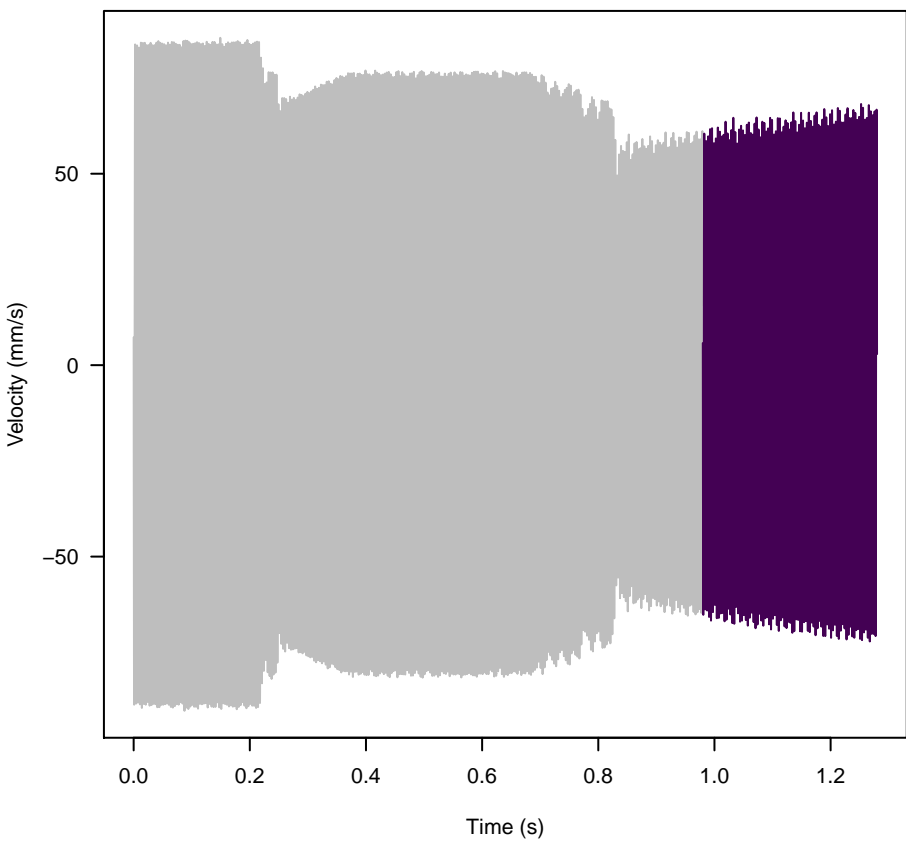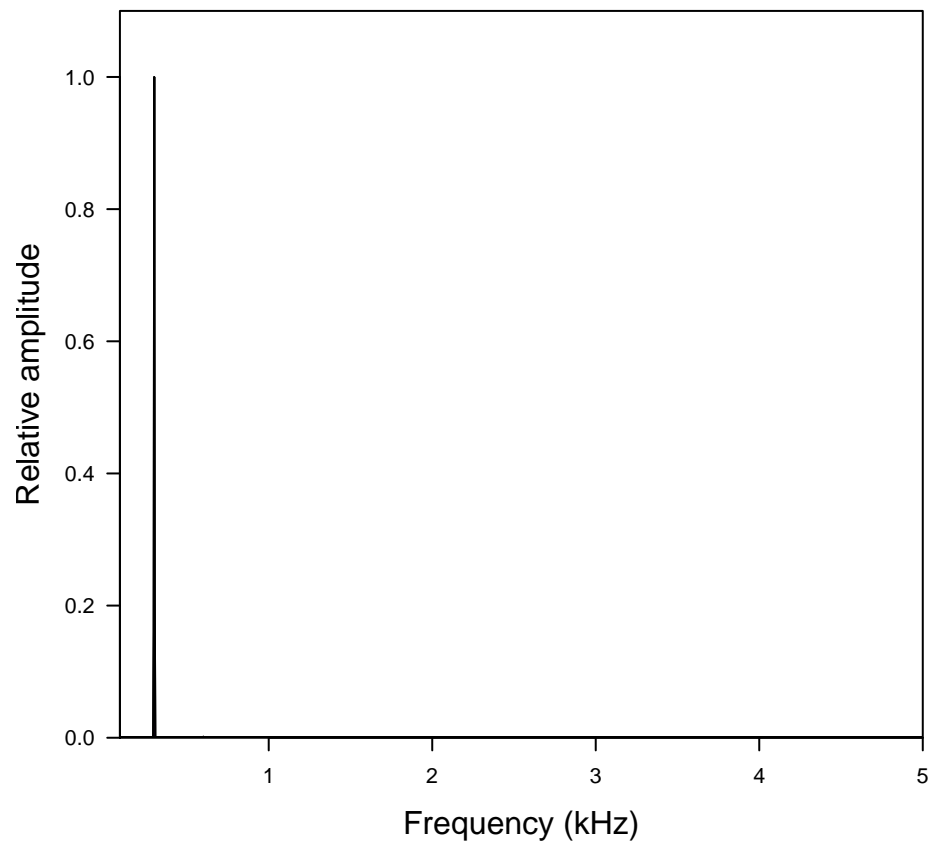

Vel. = 0.057 ; Str. = FA ; Axis = y ; Fl. accession = 10-s-79-2

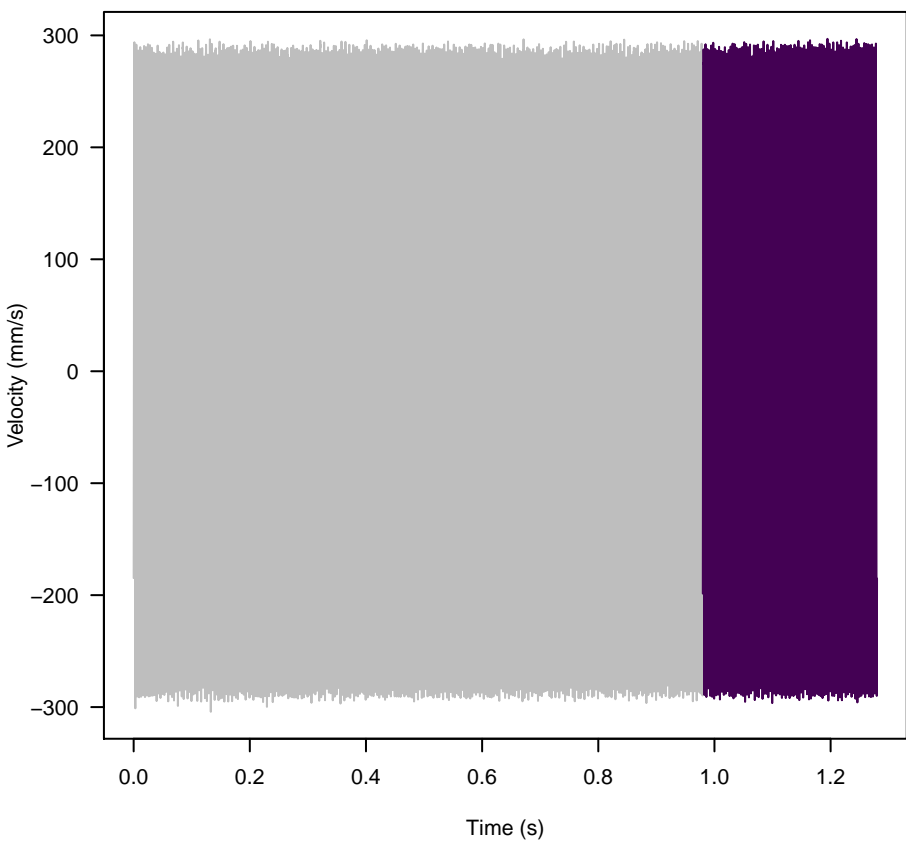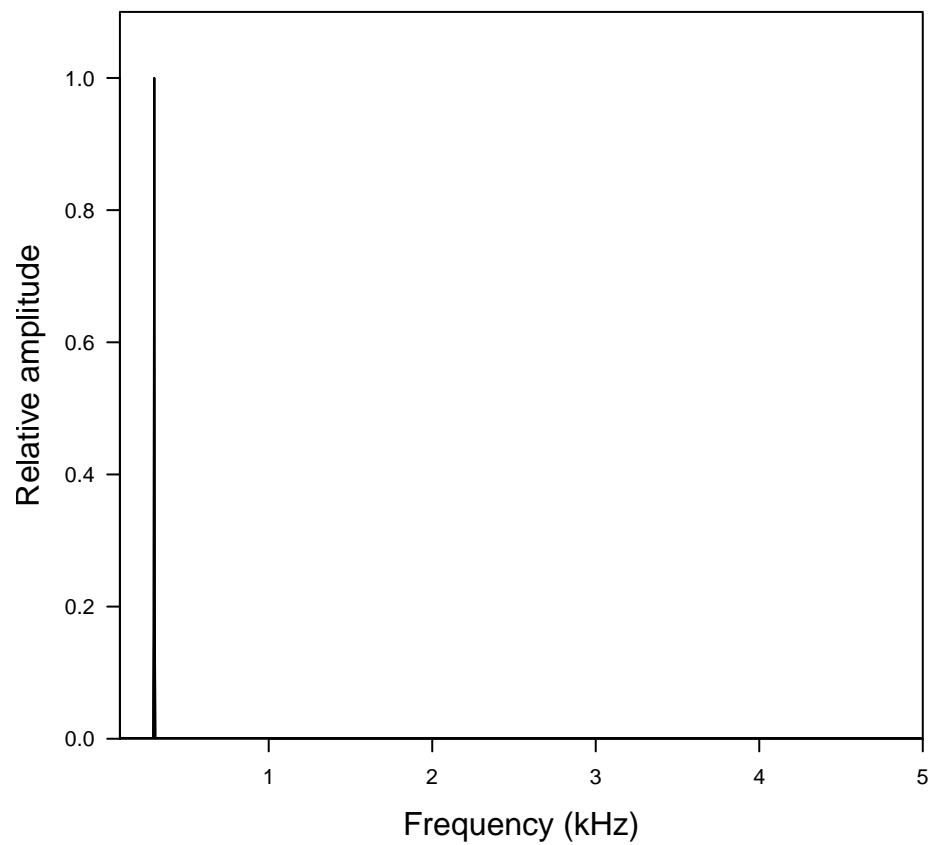

Vel. = 0.057 ; Str. = Receptacle ; Axis = y ; Fl. accession = 10-s-79-2

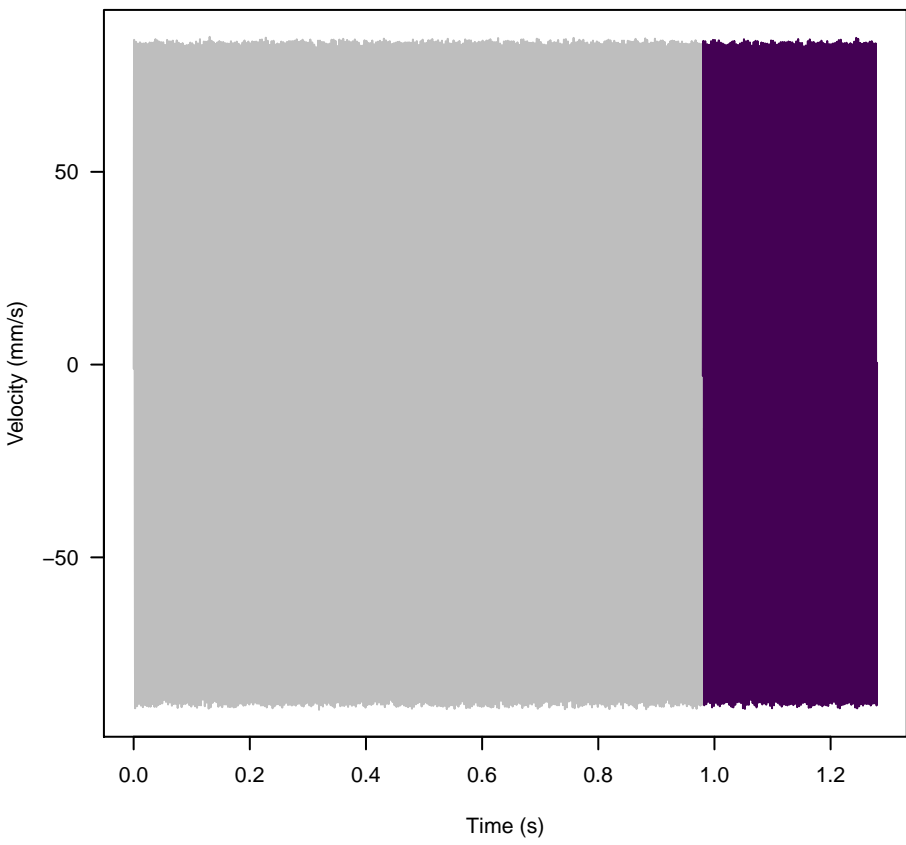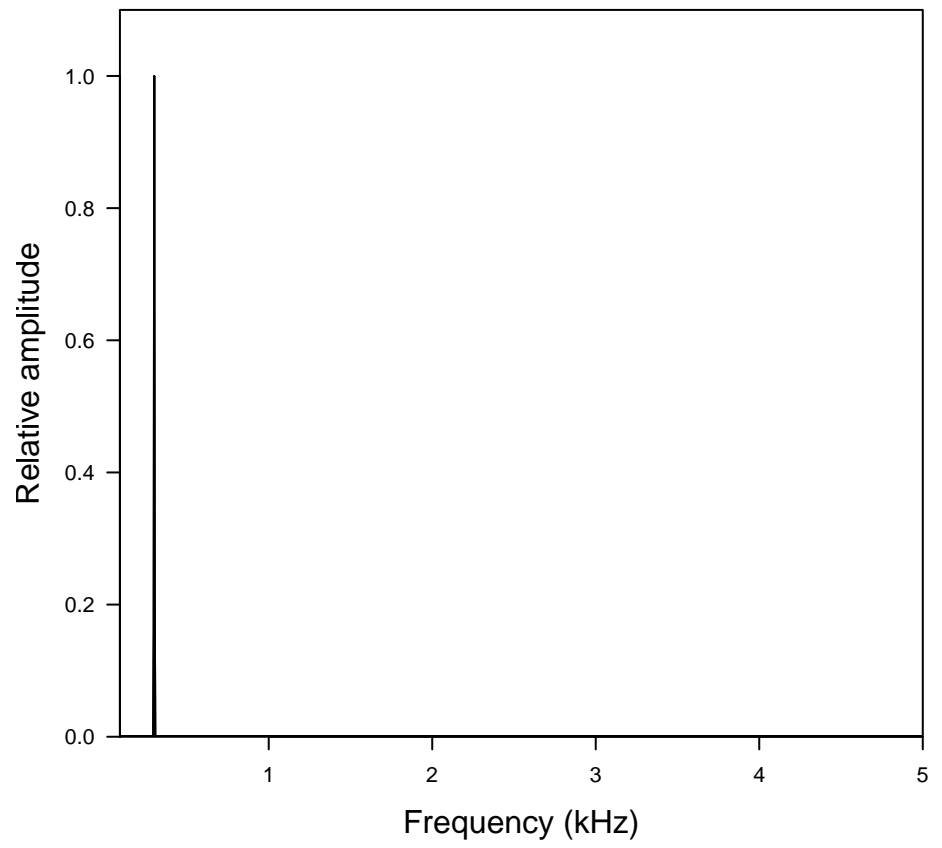

Vel. = 0.057 ; Str. = PA ; Axis = y ; Fl. accession = 10-s-79-2

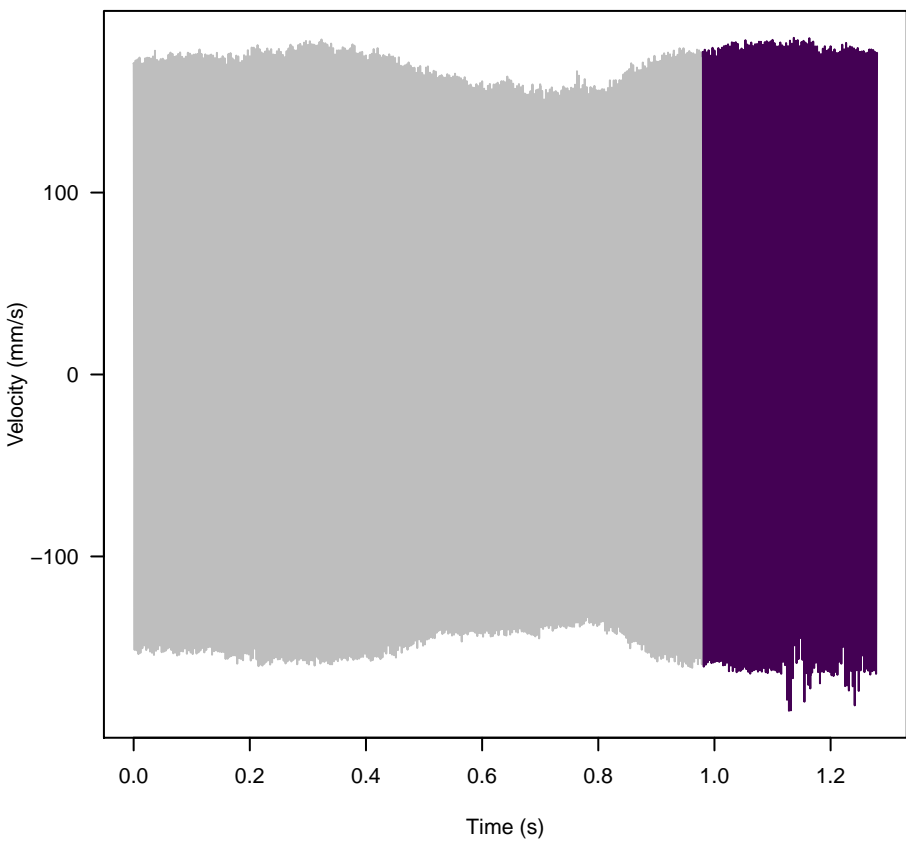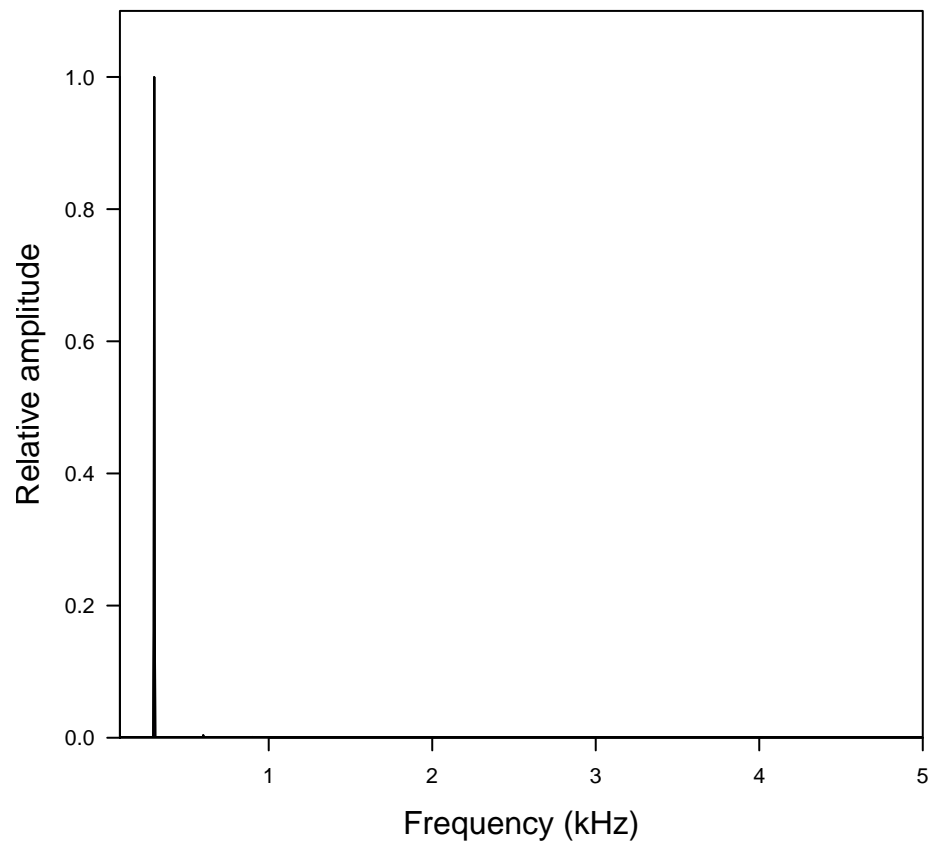

Vel. = 0.057 ; Str. = Receptacle ; Axis = y ; Fl. accession = 10-s-79-2

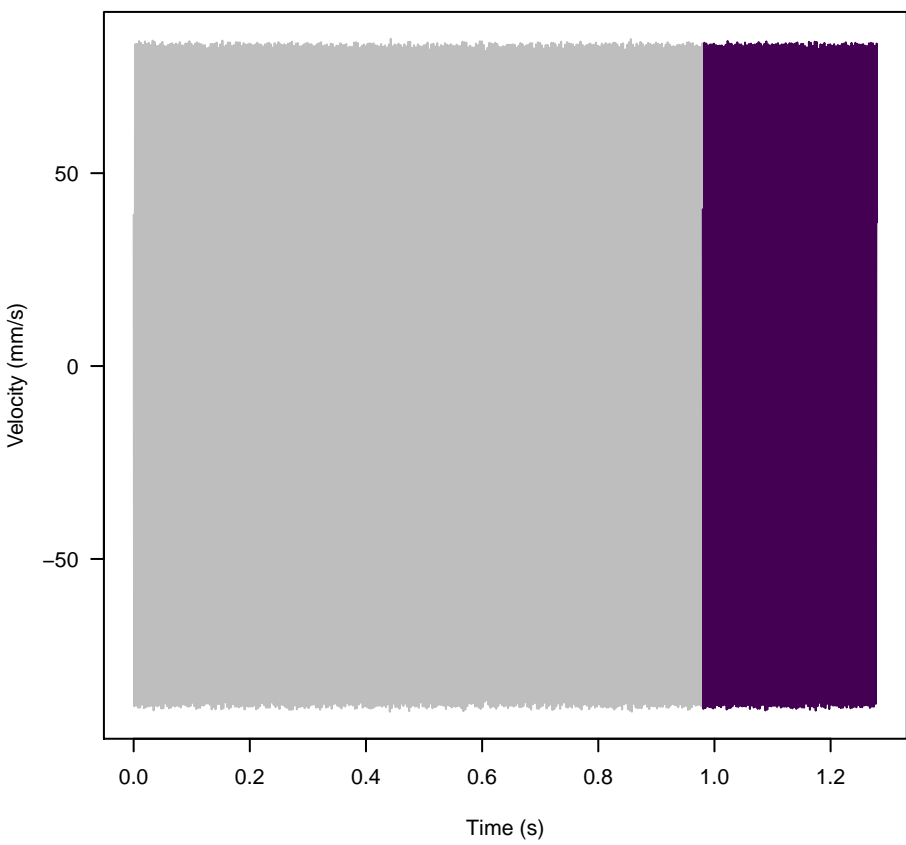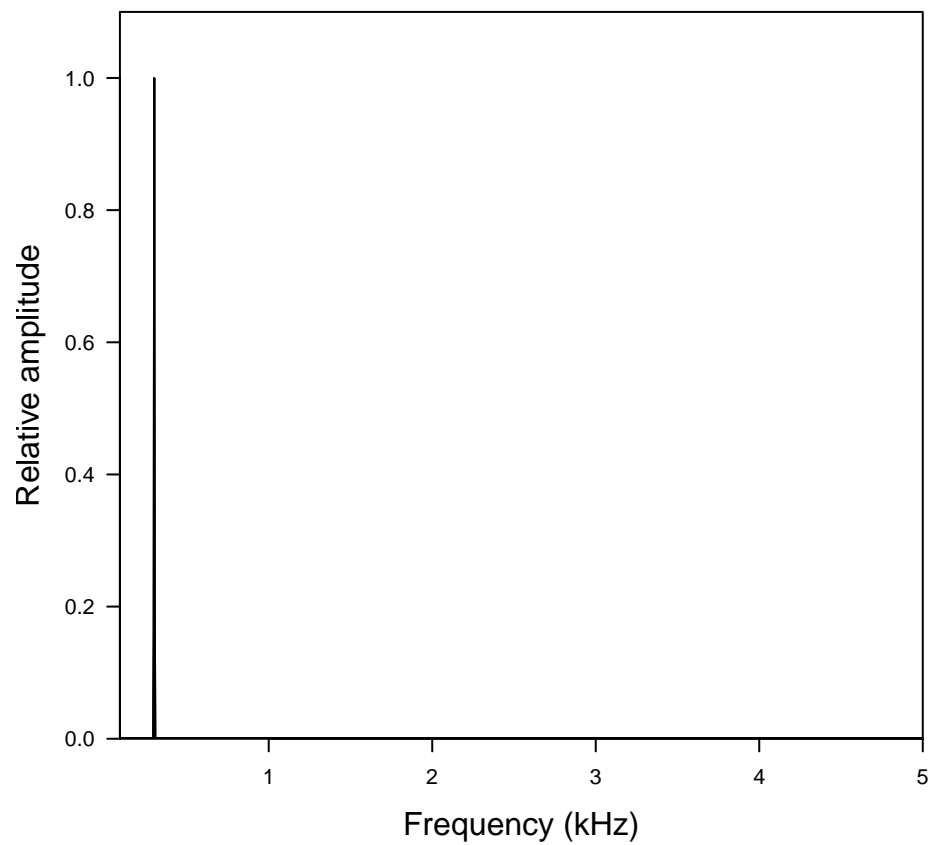



Vel. = 0.028 ; Str. = PA ; Axis = y ; Fl. accession = 10-s-79-2

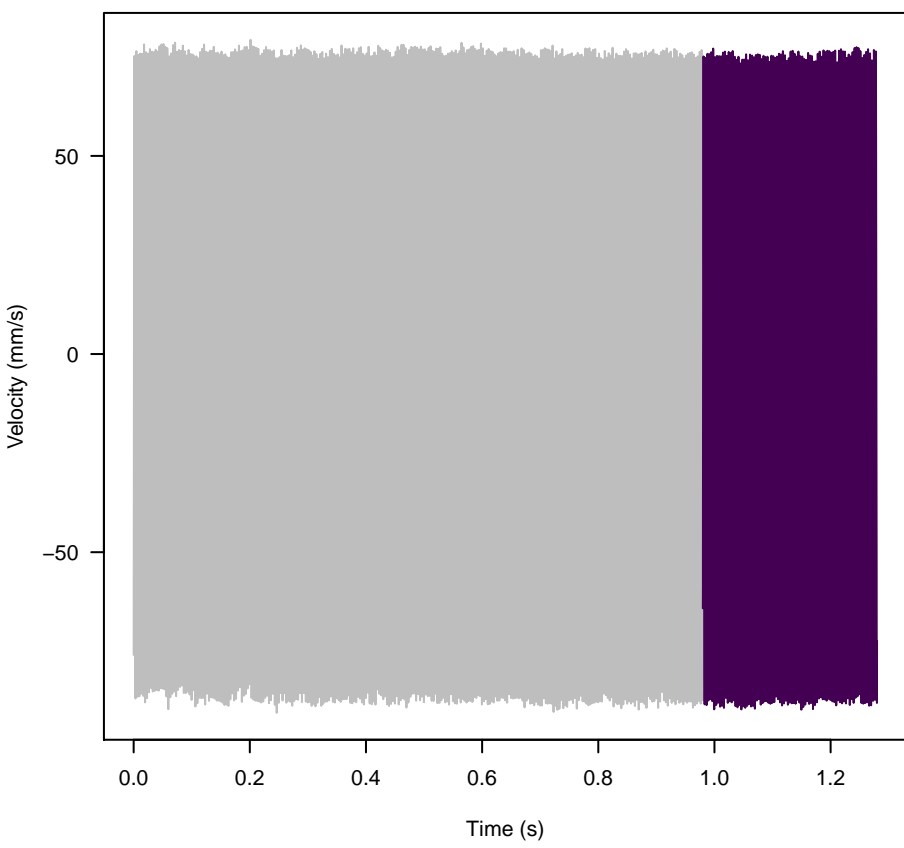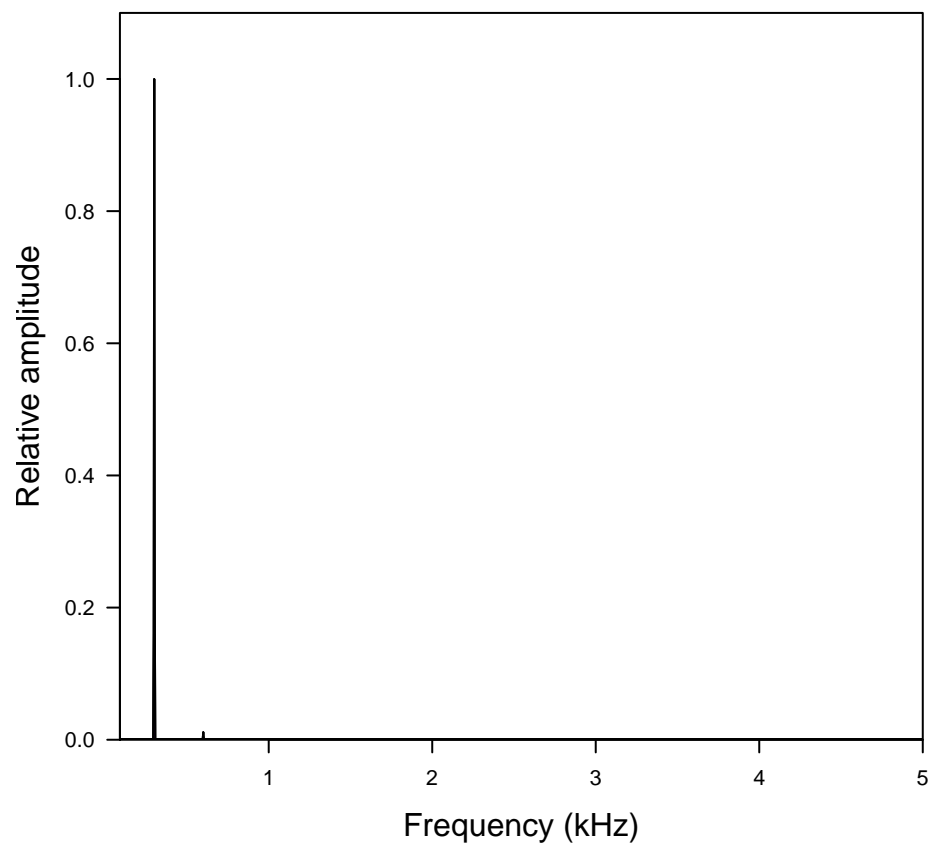

Vel. = 0.028 ; Str. = Receptacle ; Axis = y ; Fl. accession = 10-s-79-2

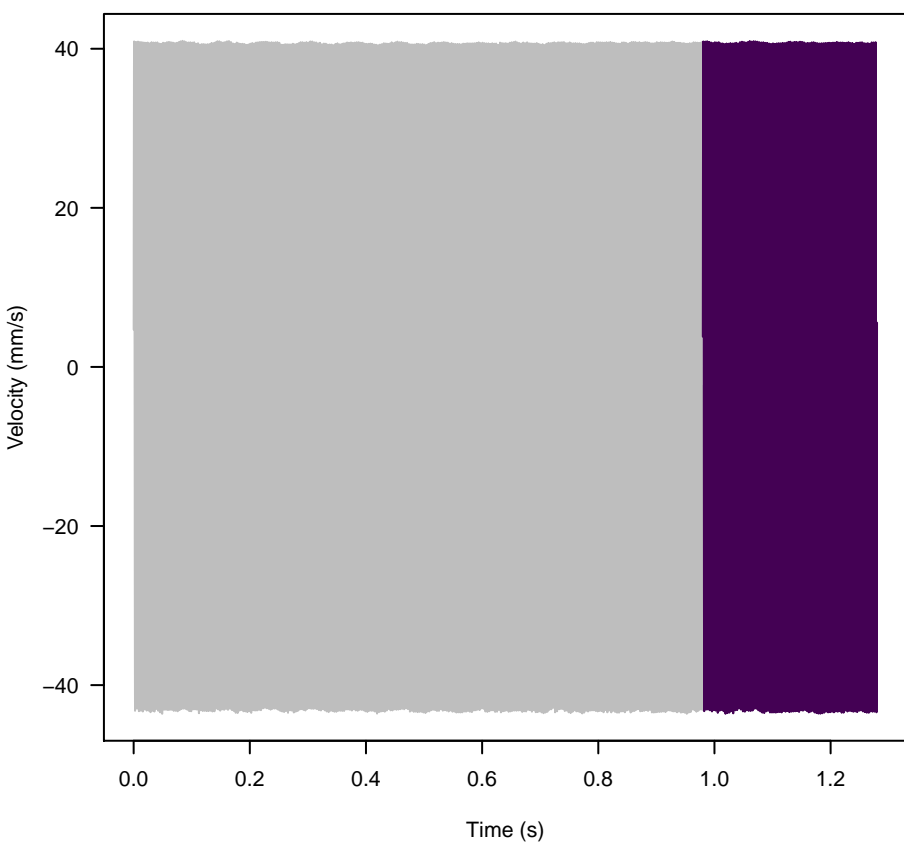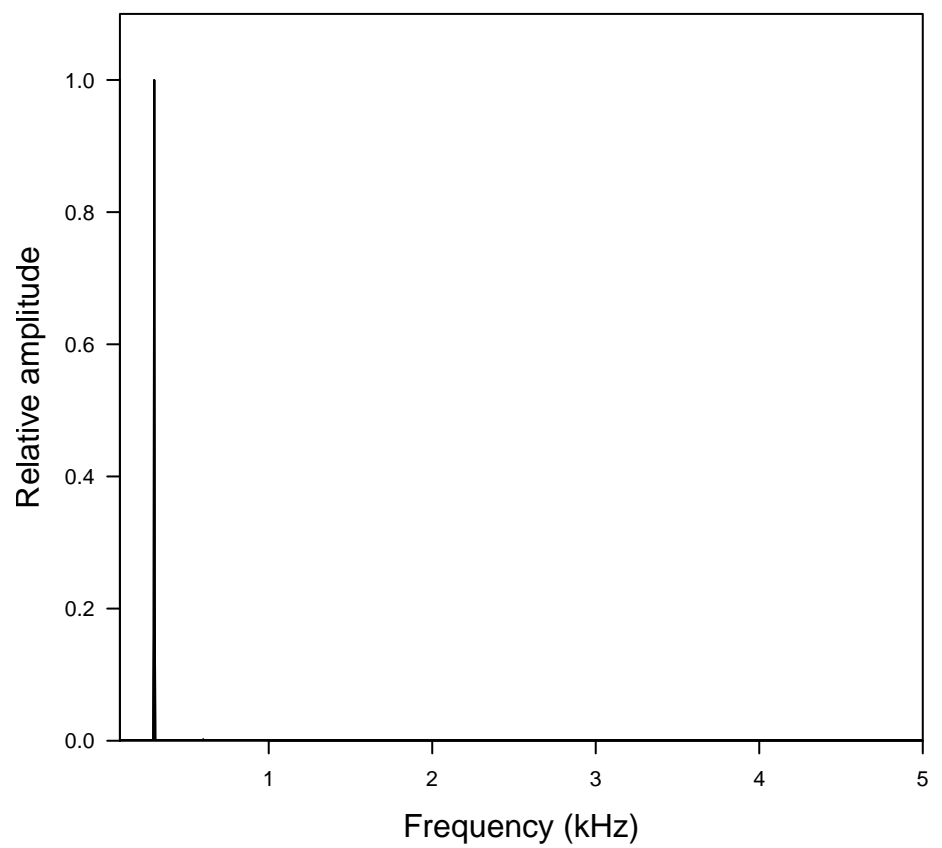

Vel. = 0.028 ; Str. = FA ; Axis = y ; Fl. accession = 10-s-79-2

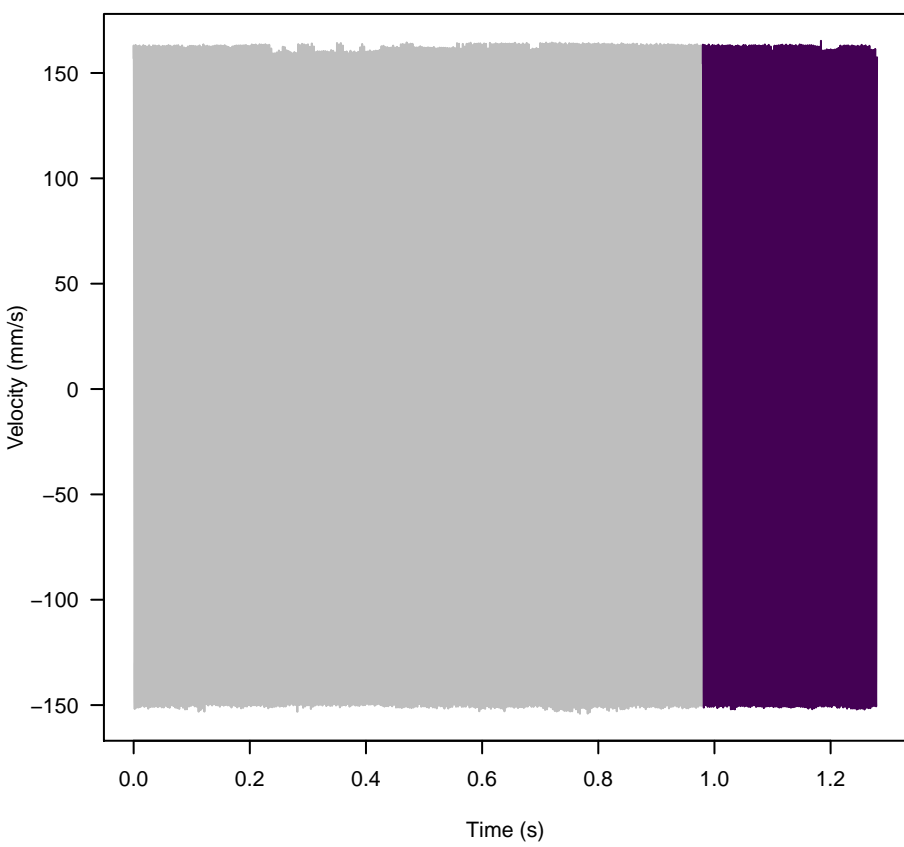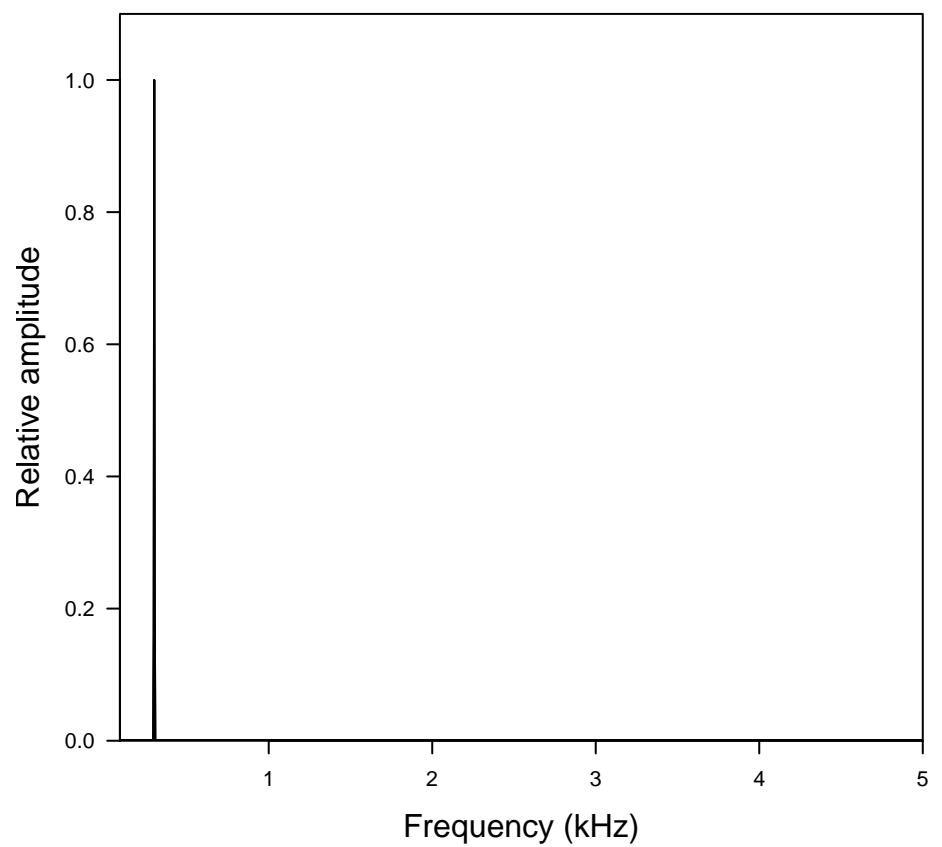

Vel. = 0.028 ; Str. = Receptacle ; Axis = y ; Fl. accession = 10-s-79-2

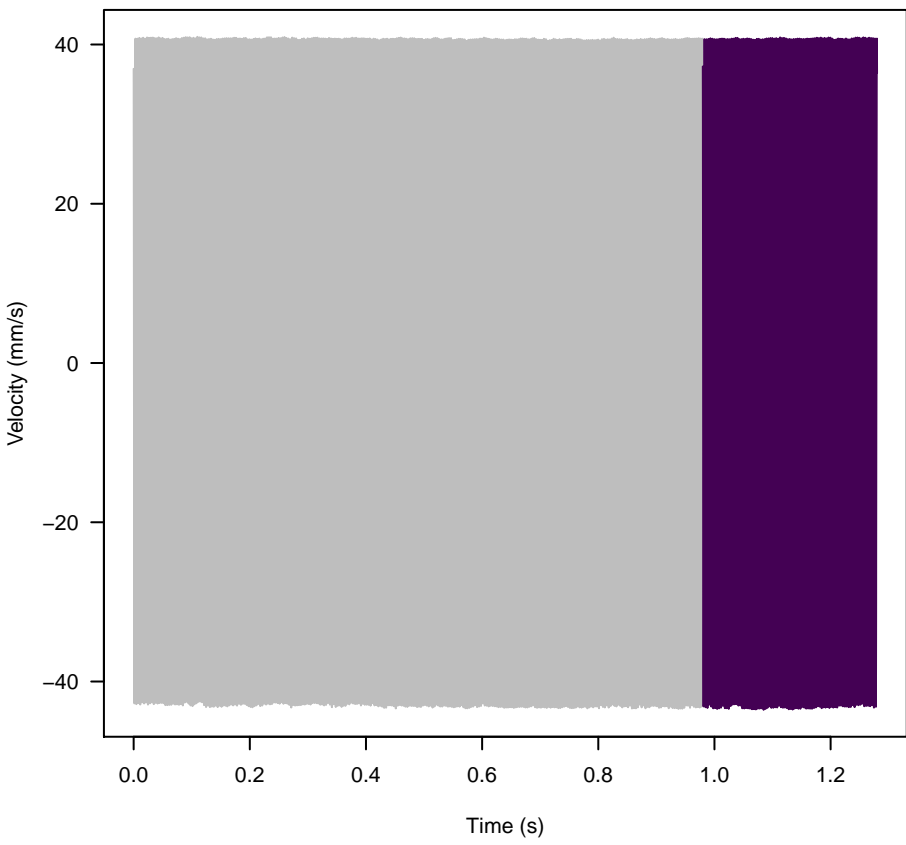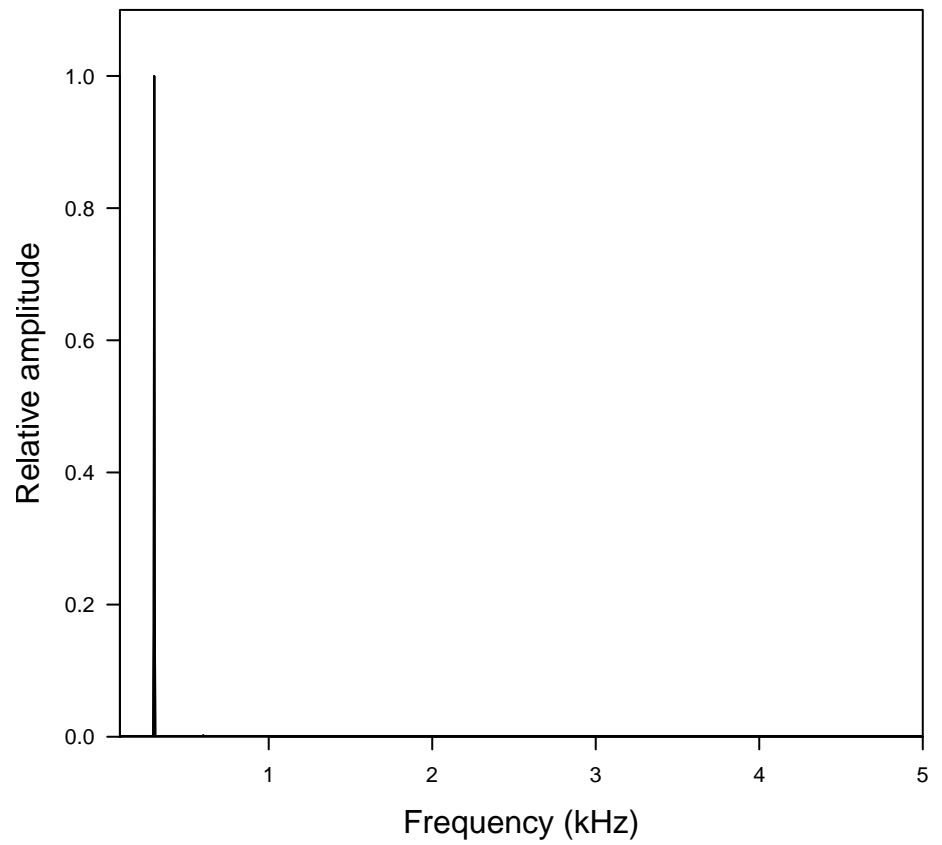

Vel. = 0.028 ; Str. = Corolla ; Axis = y ; Fl. accession = 10-s-79-2

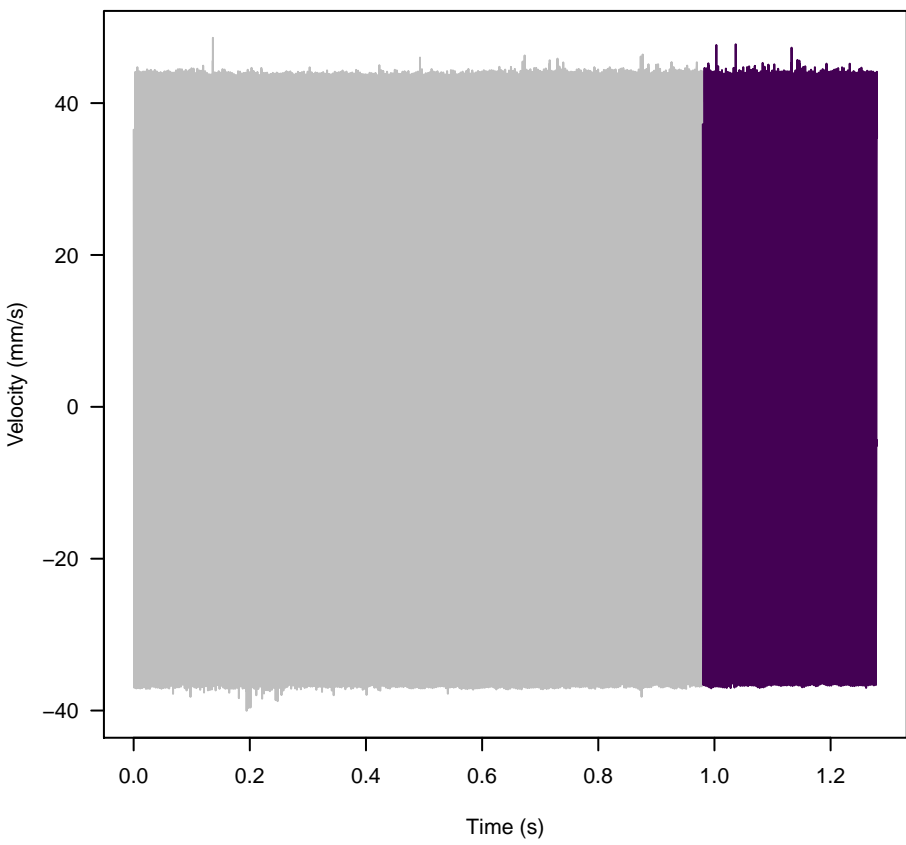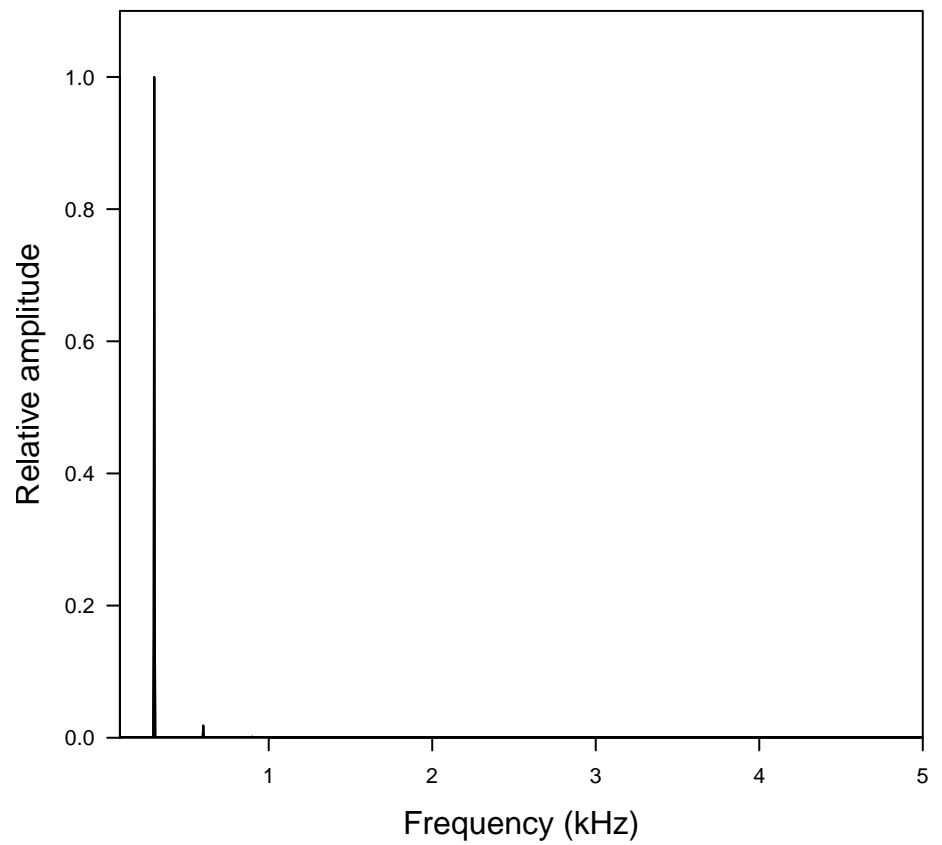

Vel. = 0.028 ; Str. = Receptacle ; Axis = y ; Fl. accession = 10-s-79-2

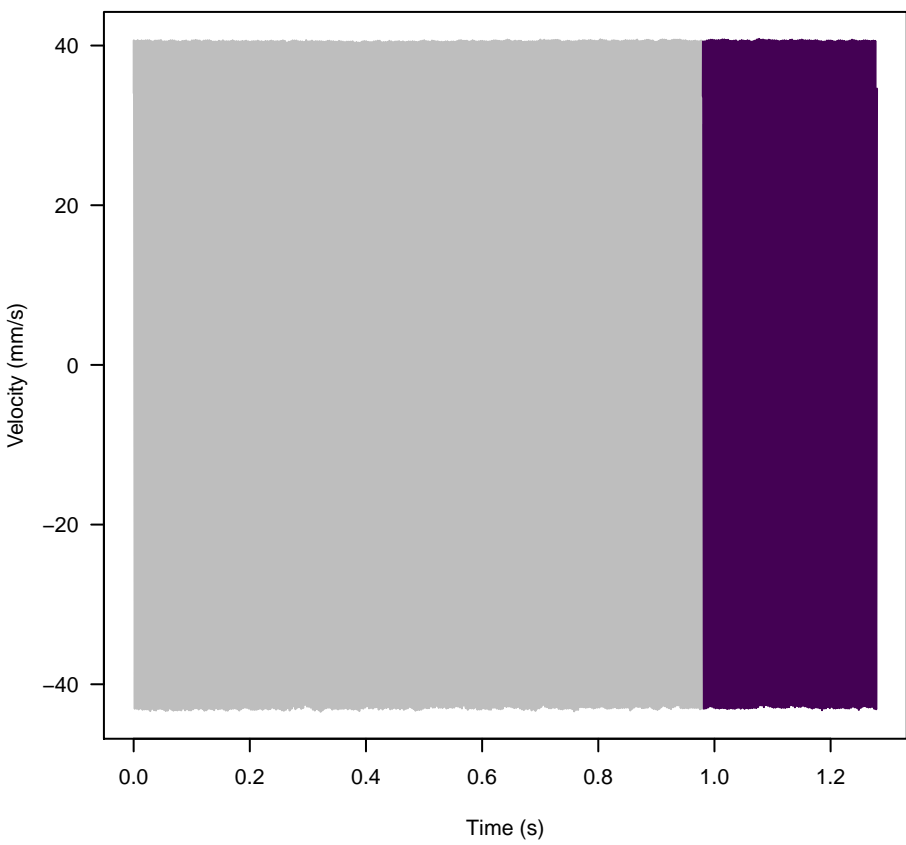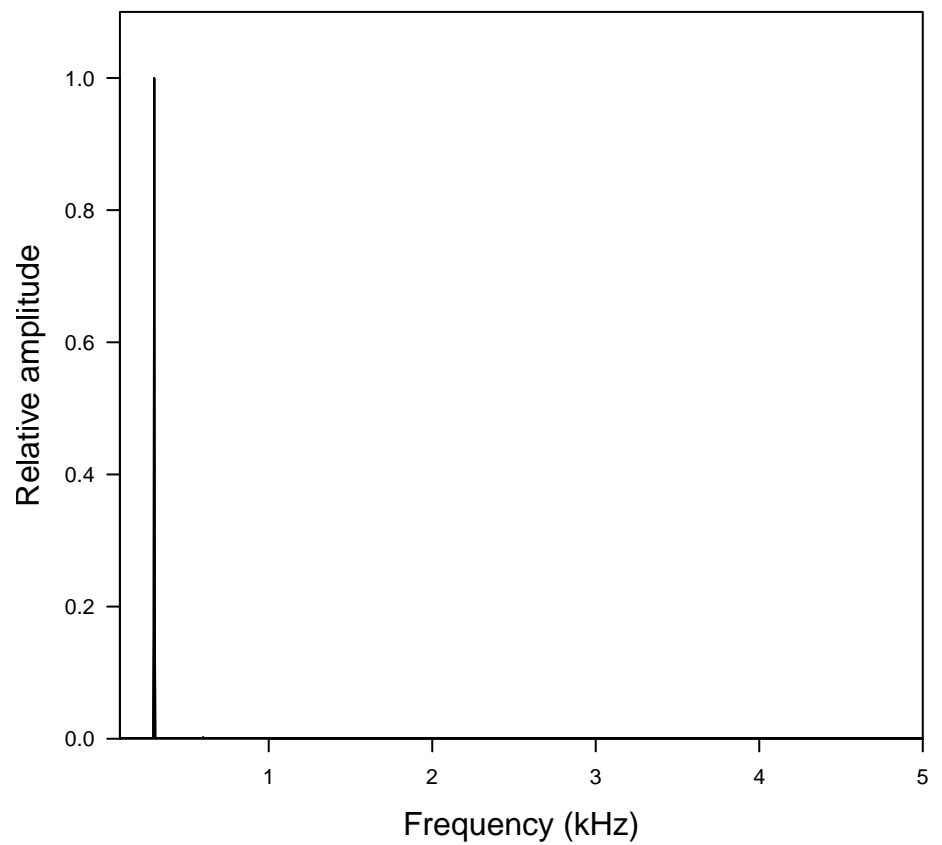

Vel. = 0.014 ; Str. = Corolla ; Axis = y ; Fl. accession = 10-s-79-2

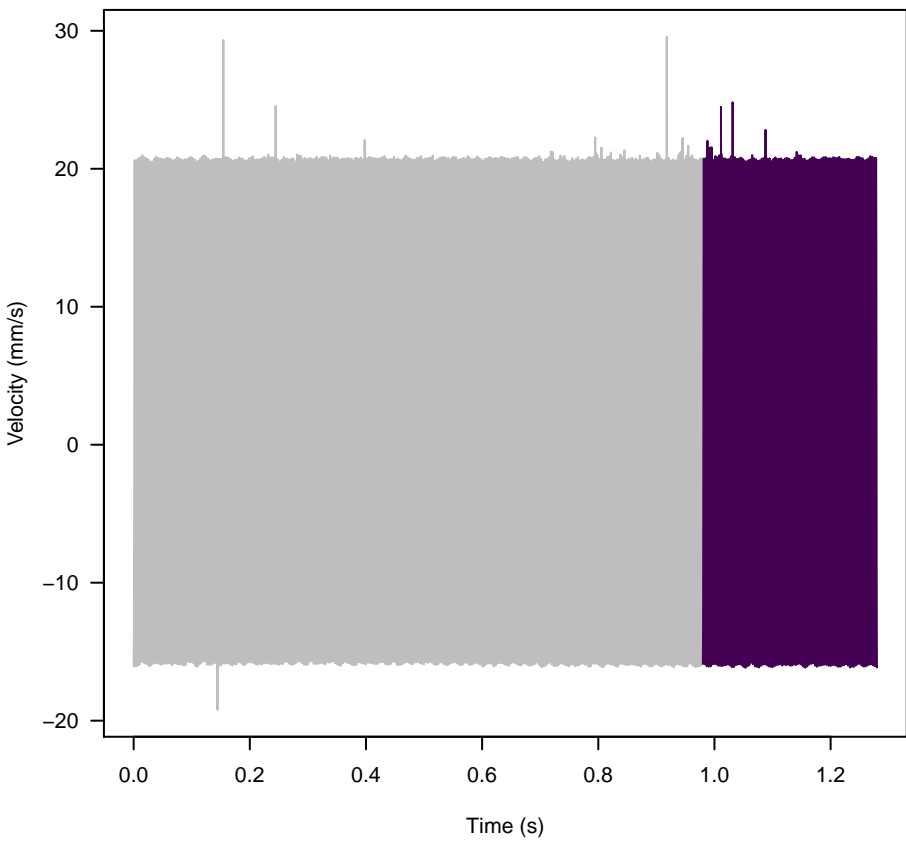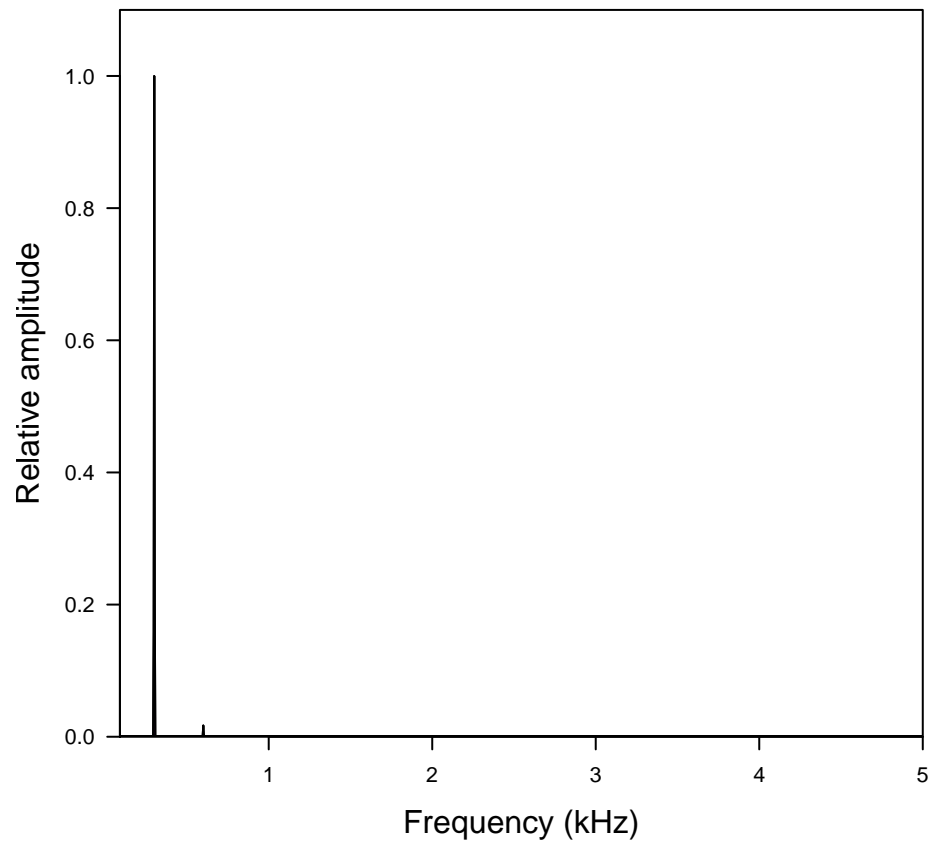

Vel. = 0.014 ; Str. = Receptacle ; Axis = y ; Fl. accession = 10-s-79-2

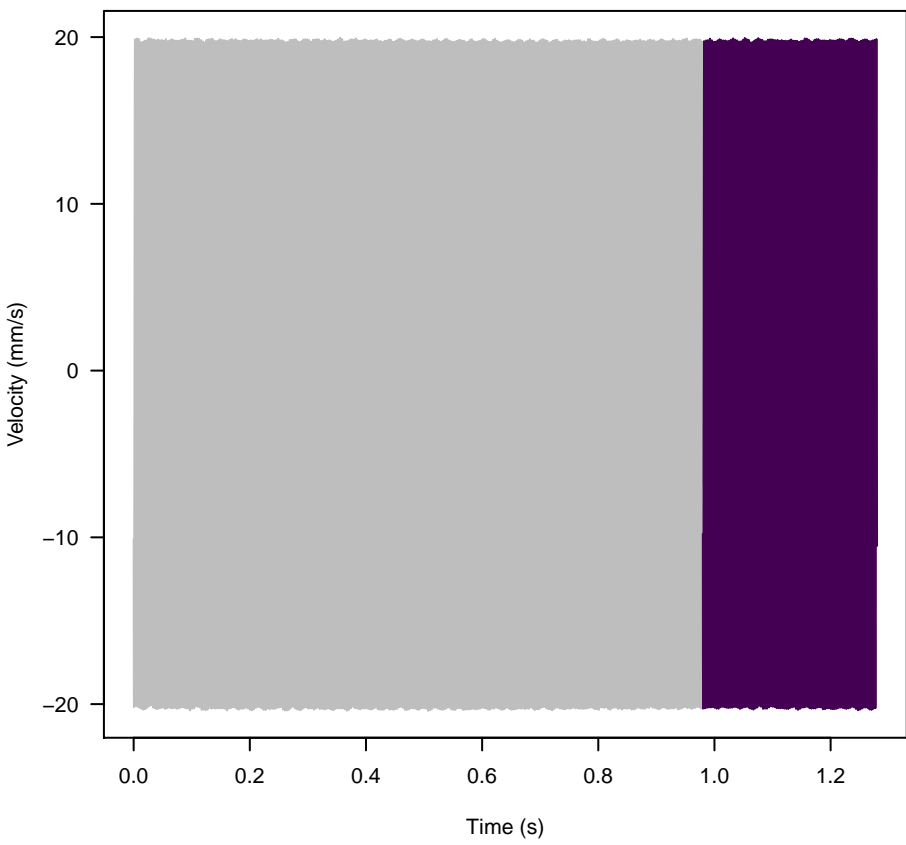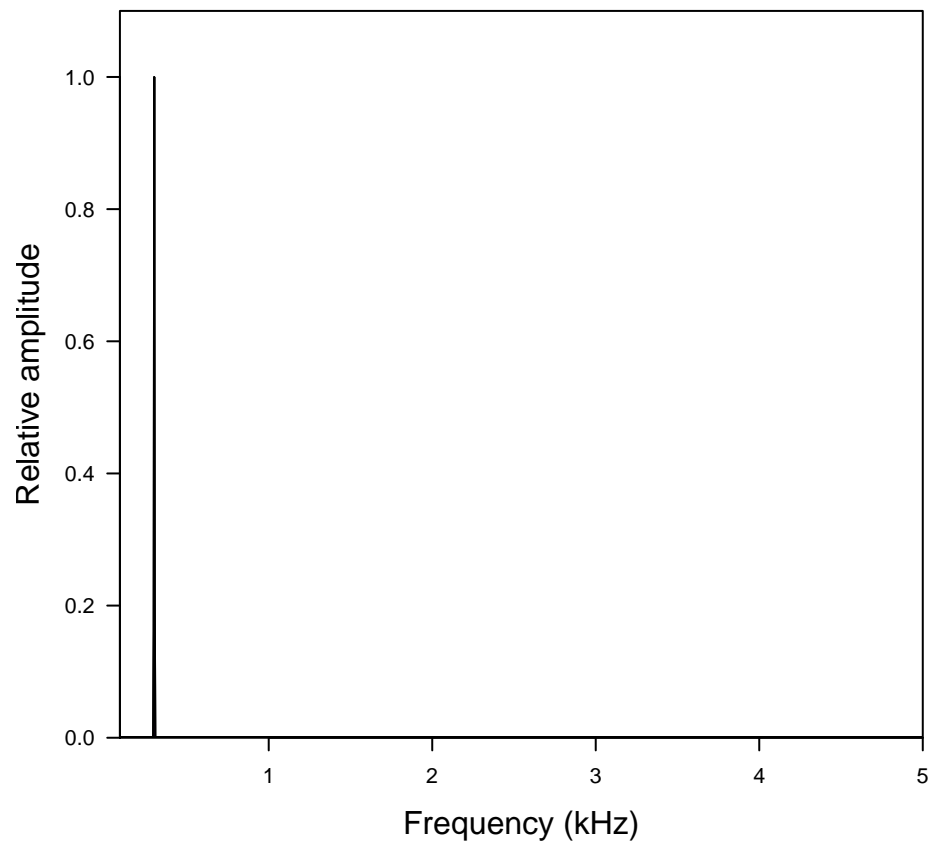

Vel. = 0.014 ; Str. = FA ; Axis = y ; Fl. accession = 10-s-79-2

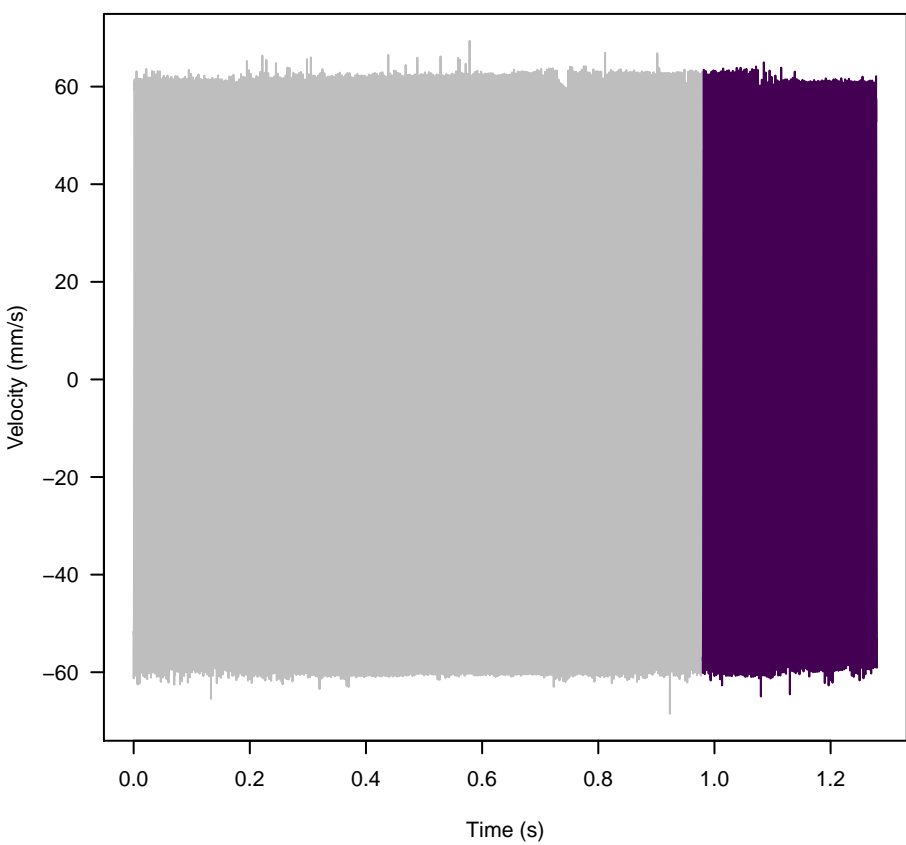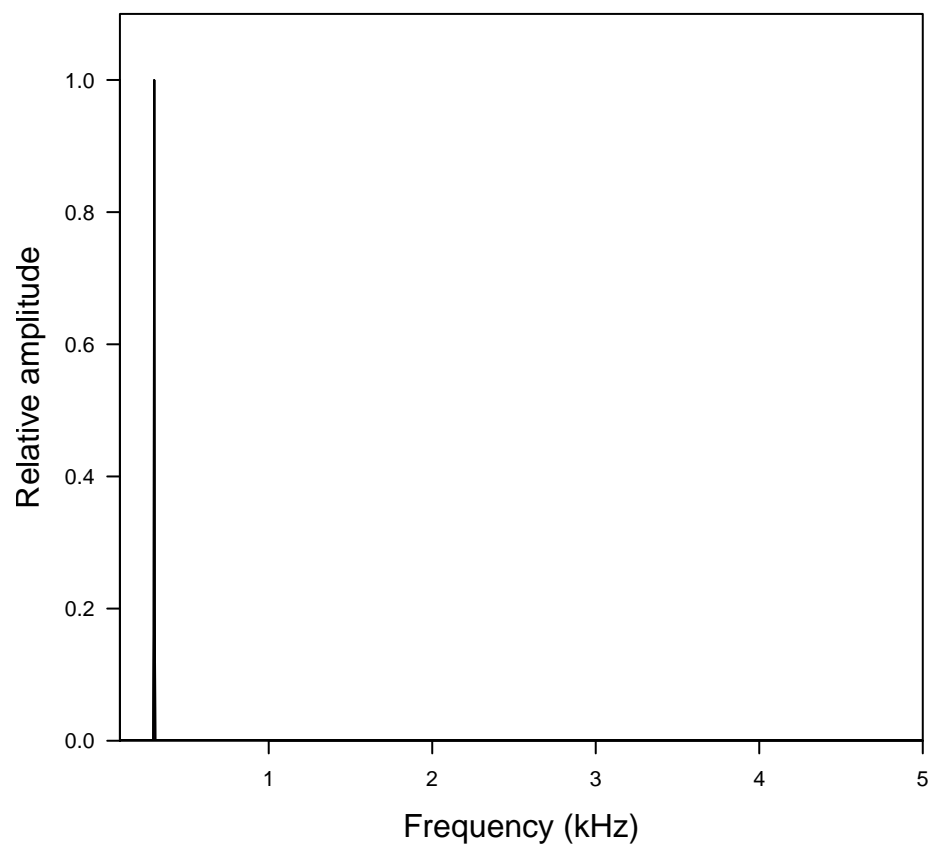

Vel. = 0.014 ; Str. = Receptacle ; Axis = y ; Fl. accession = 10-s-79-2

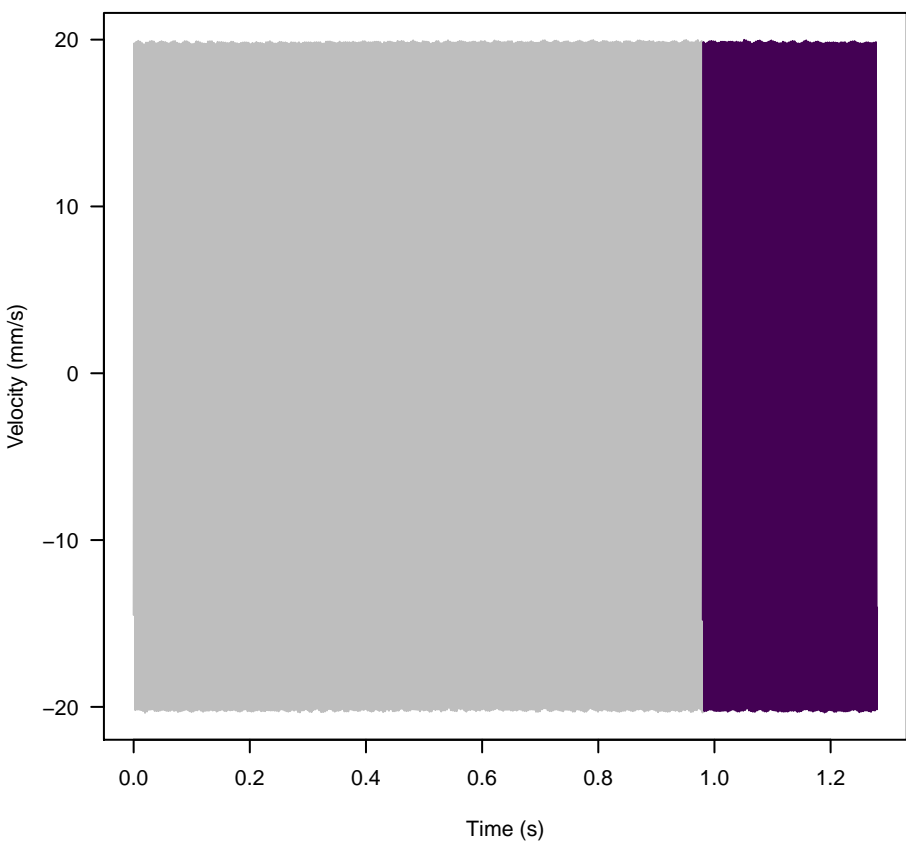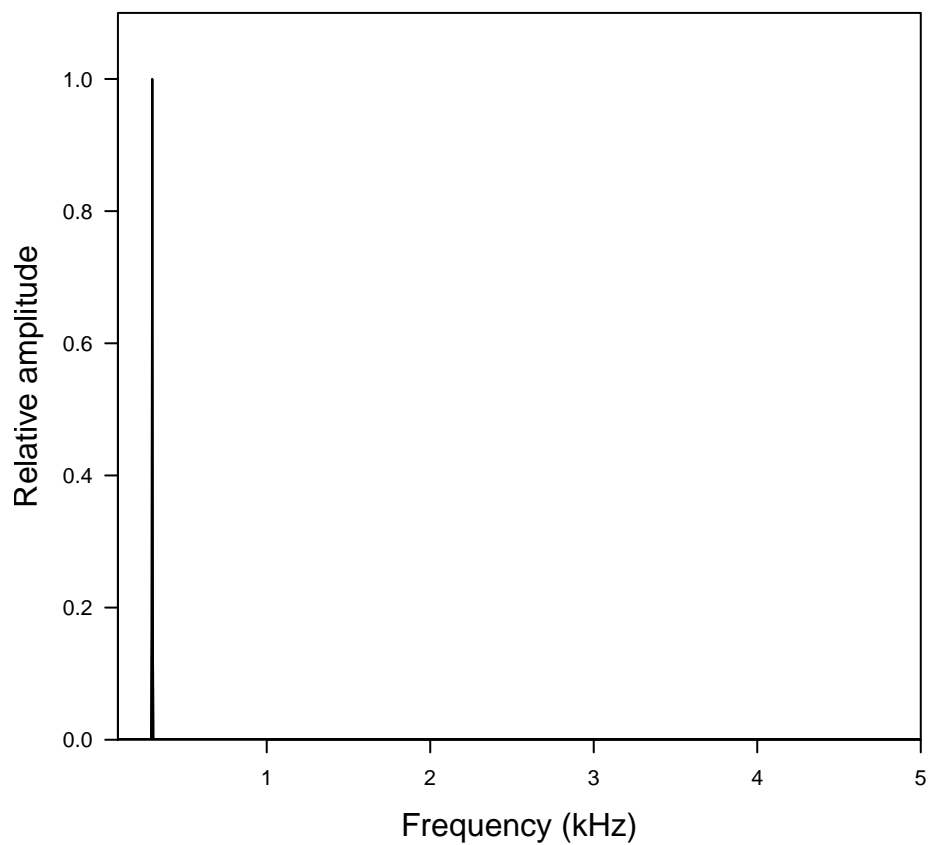

Vel. = 0.014 ; Str. = PA ; Axis = y ; Fl. accession = 10-s-79-2

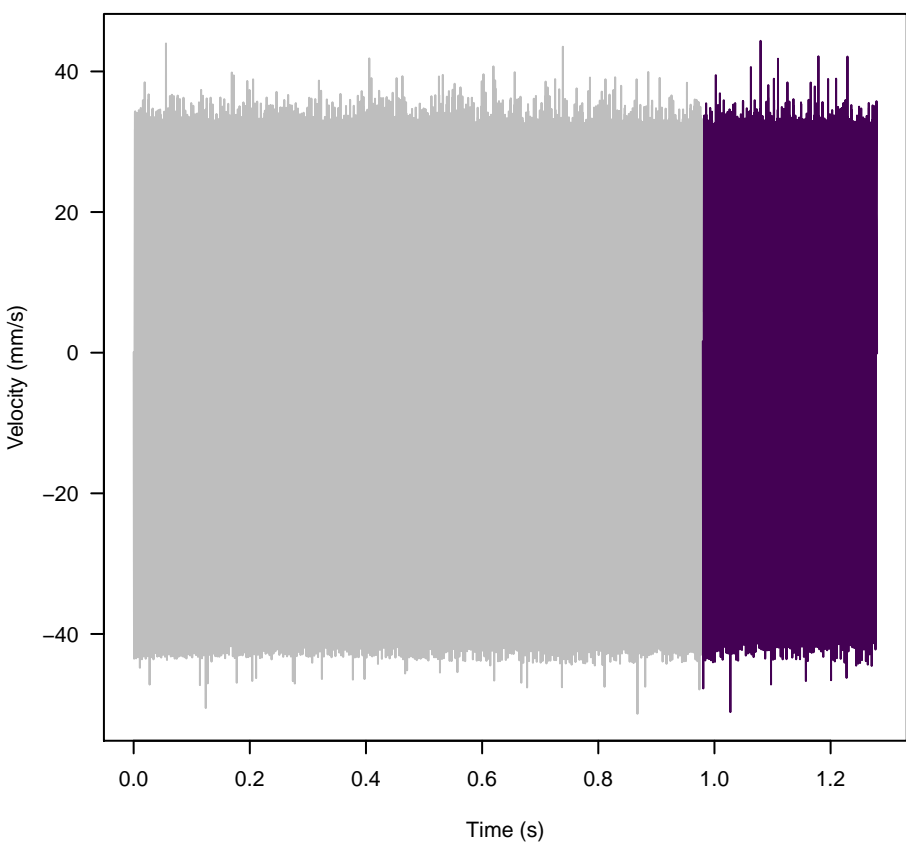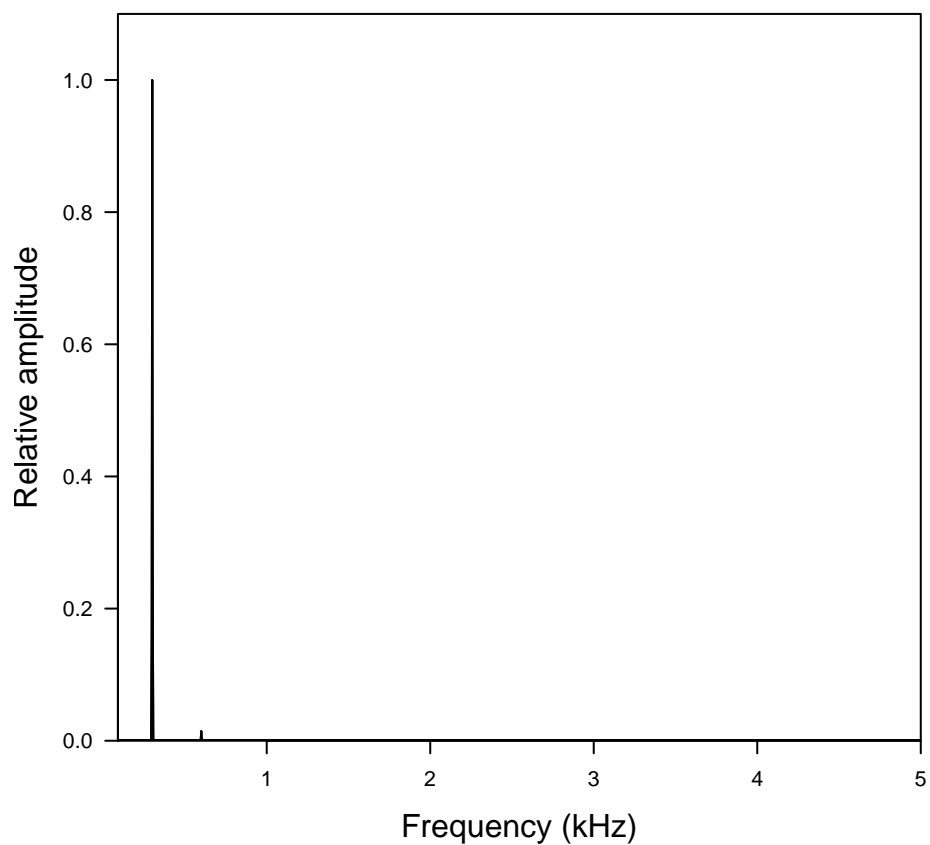

Vel. = 0.014 ; Str. = Receptacle ; Axis = y ; Fl. accession = 10-s-79-2

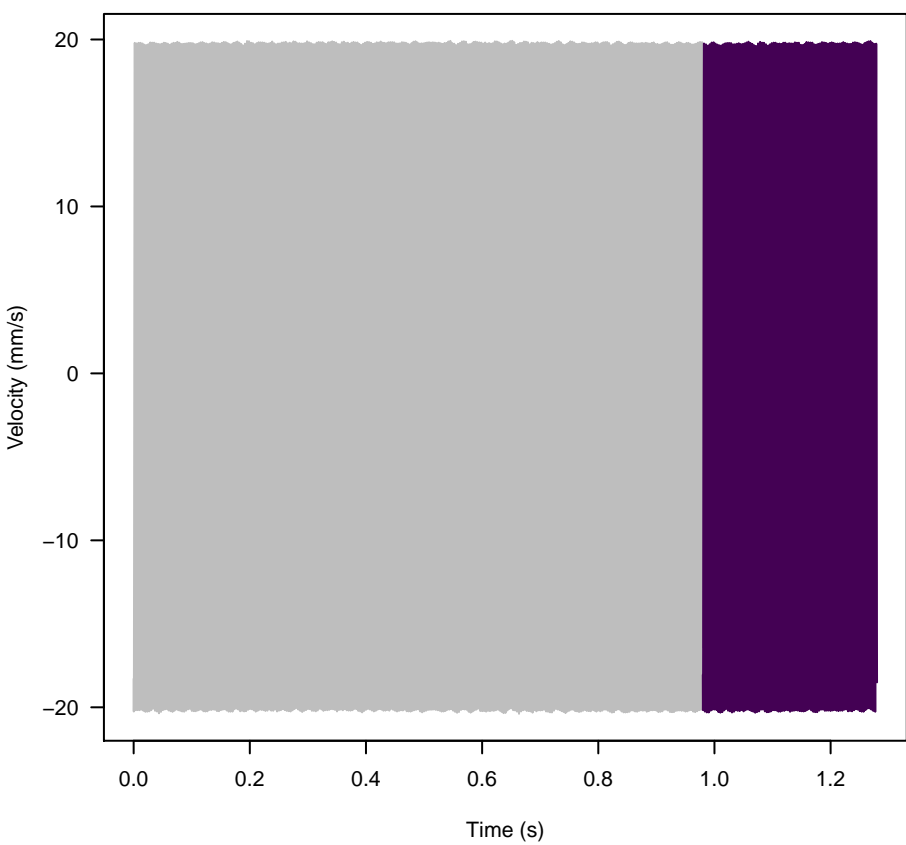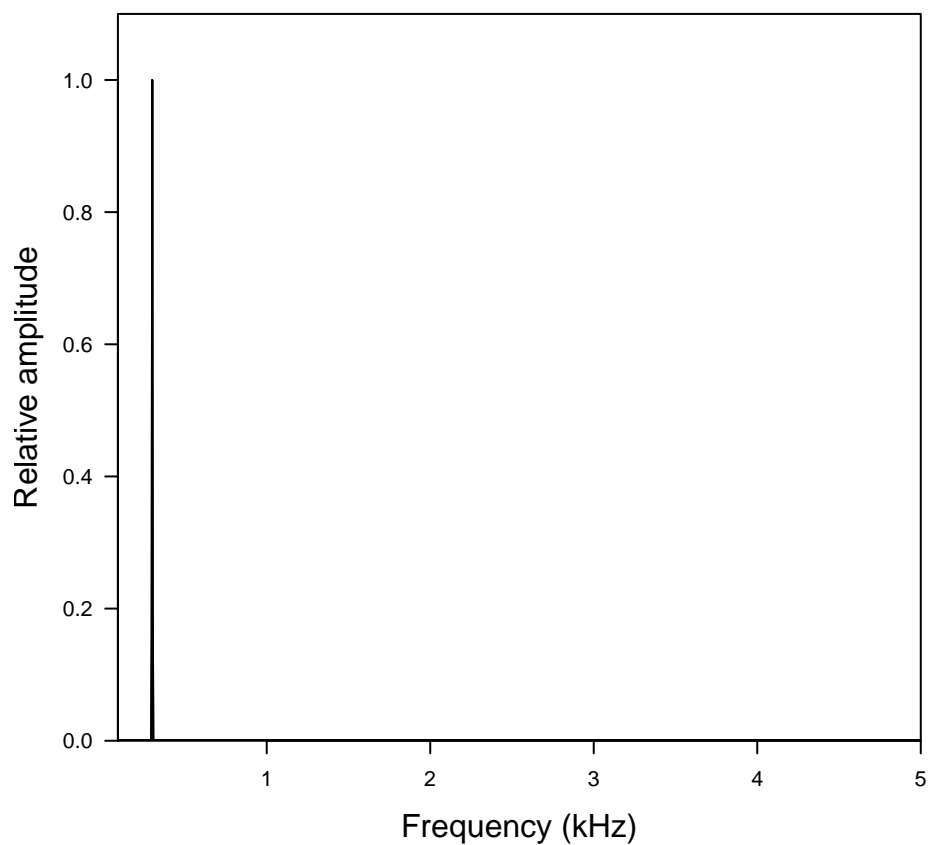

Vel. = 0.014 ; Str. = Corolla ; Axis = z ; Fl. accession = 10-s-79-2

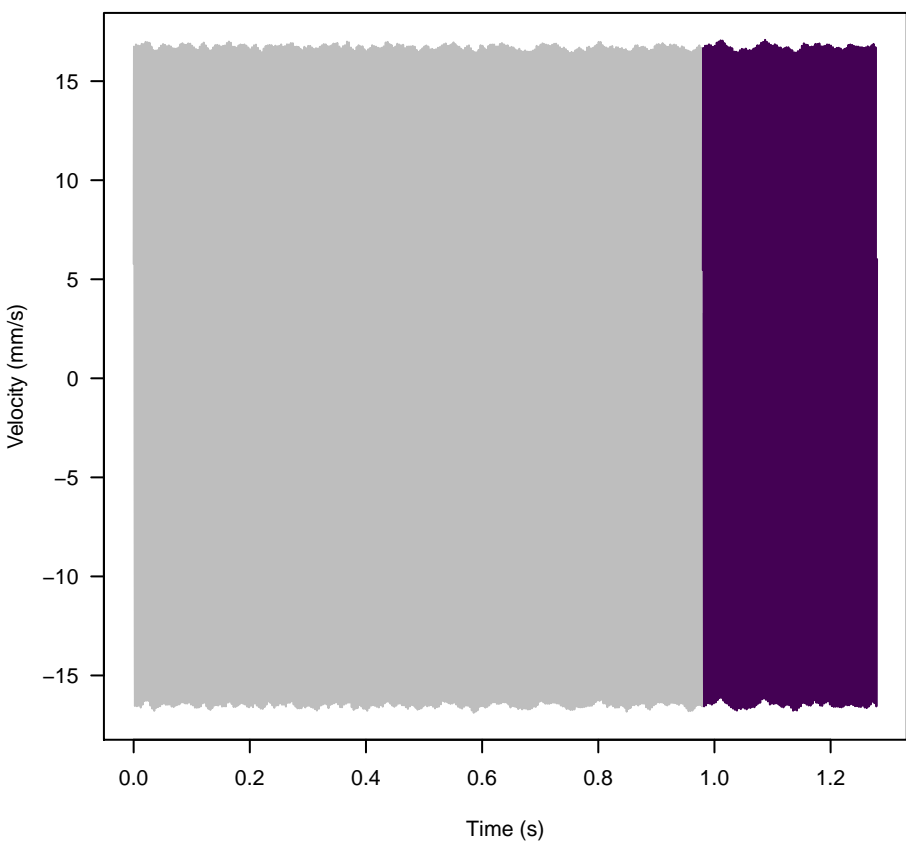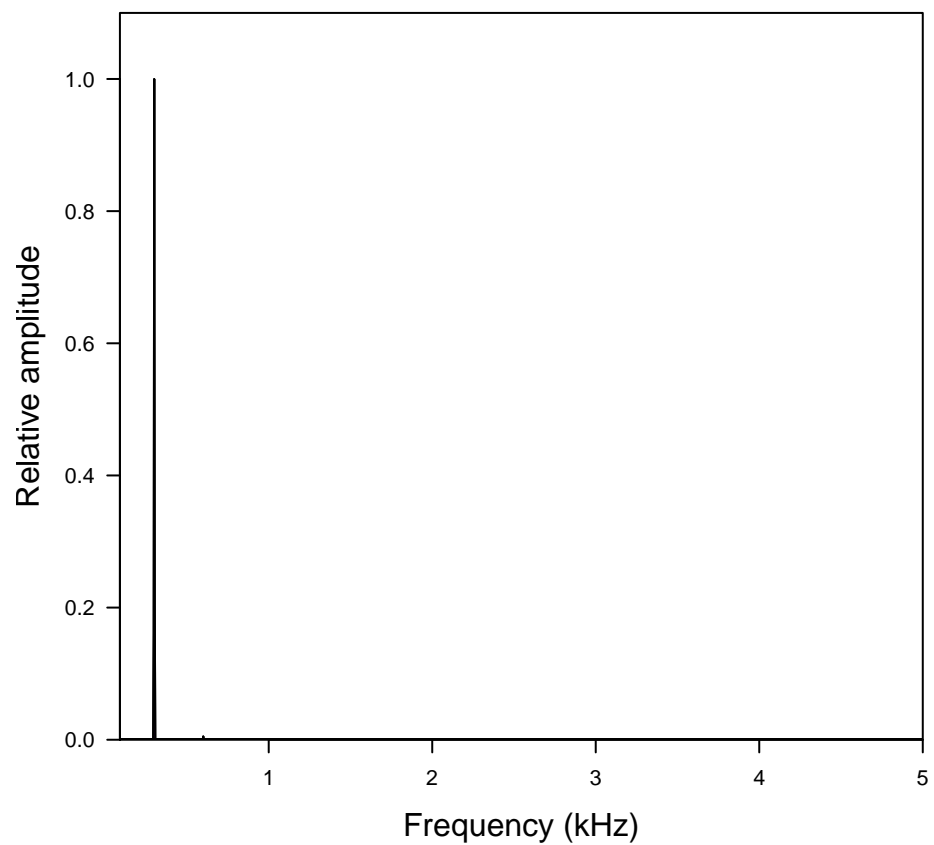

Vel. = 0.014 ; Str. = Receptacle ; Axis = z ; Fl. accession = 10-s-79-2

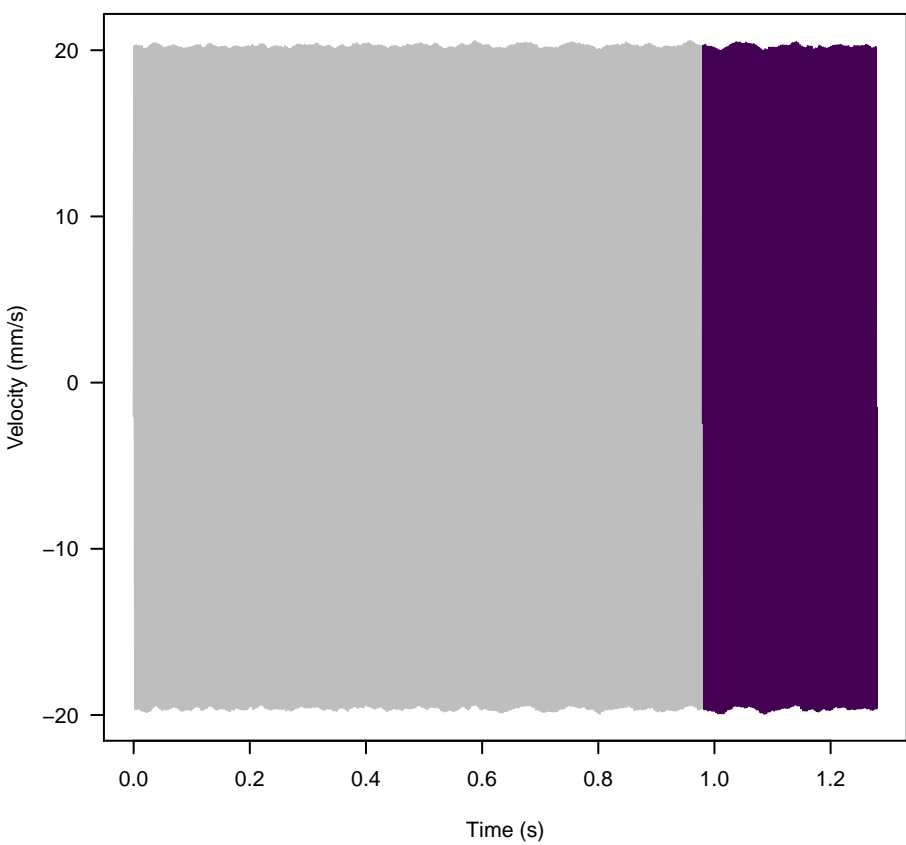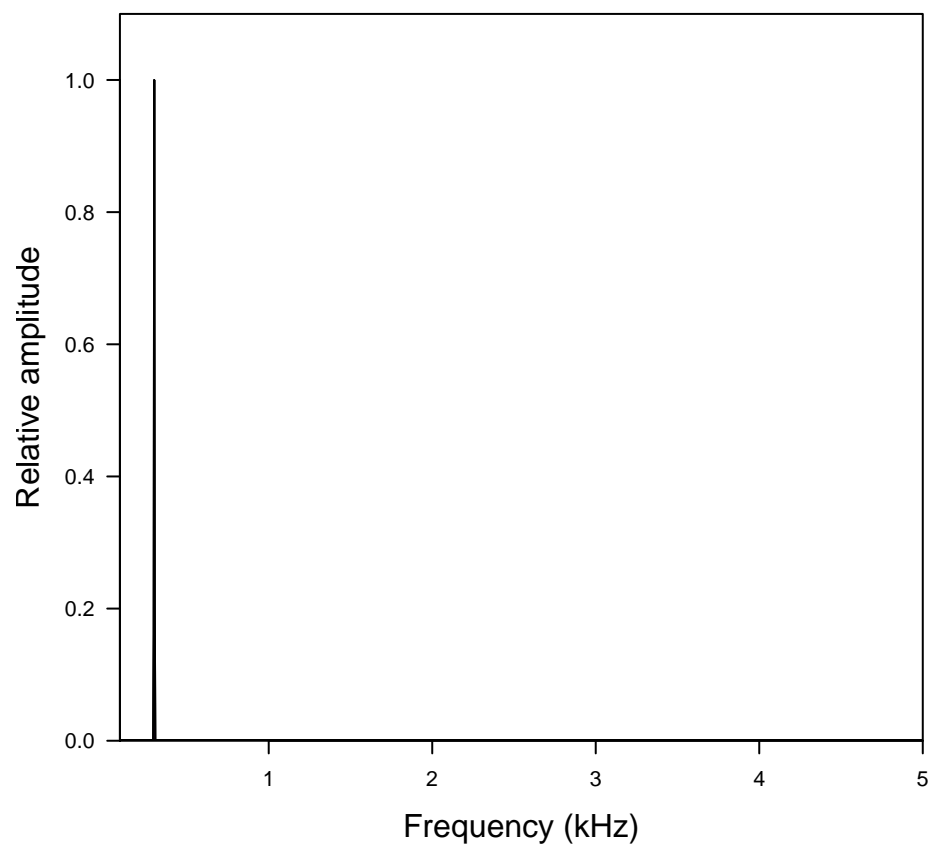

Vel. = 0.014 ; Str. = FA ; Axis = z ; Fl. accession = 10-s-79-2

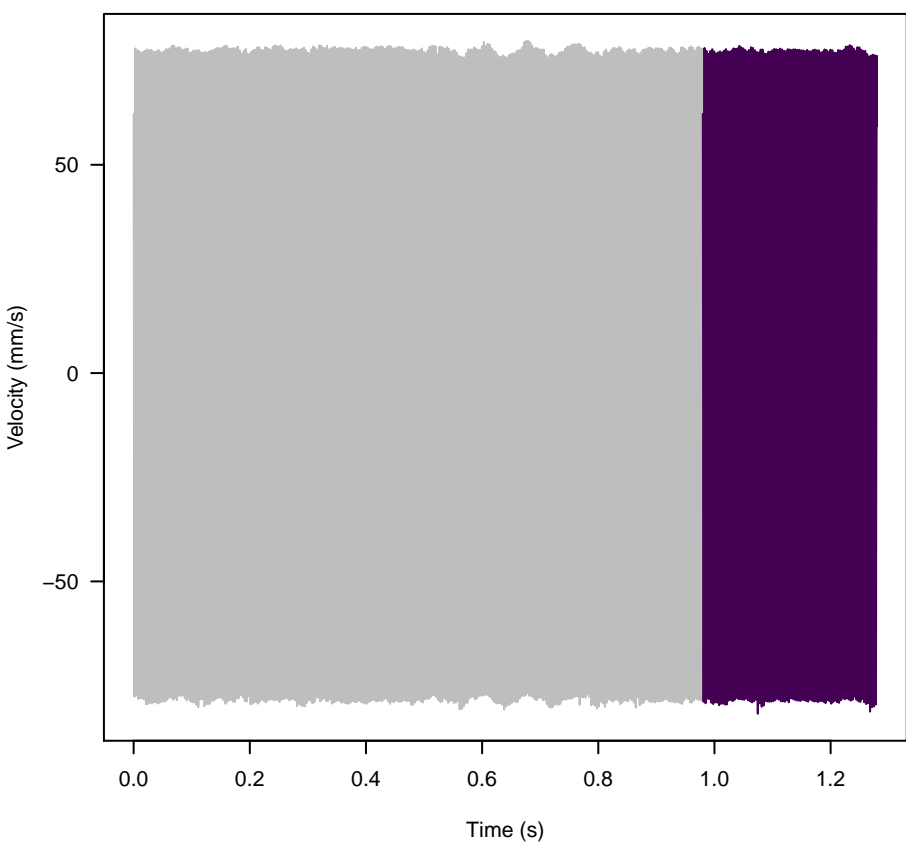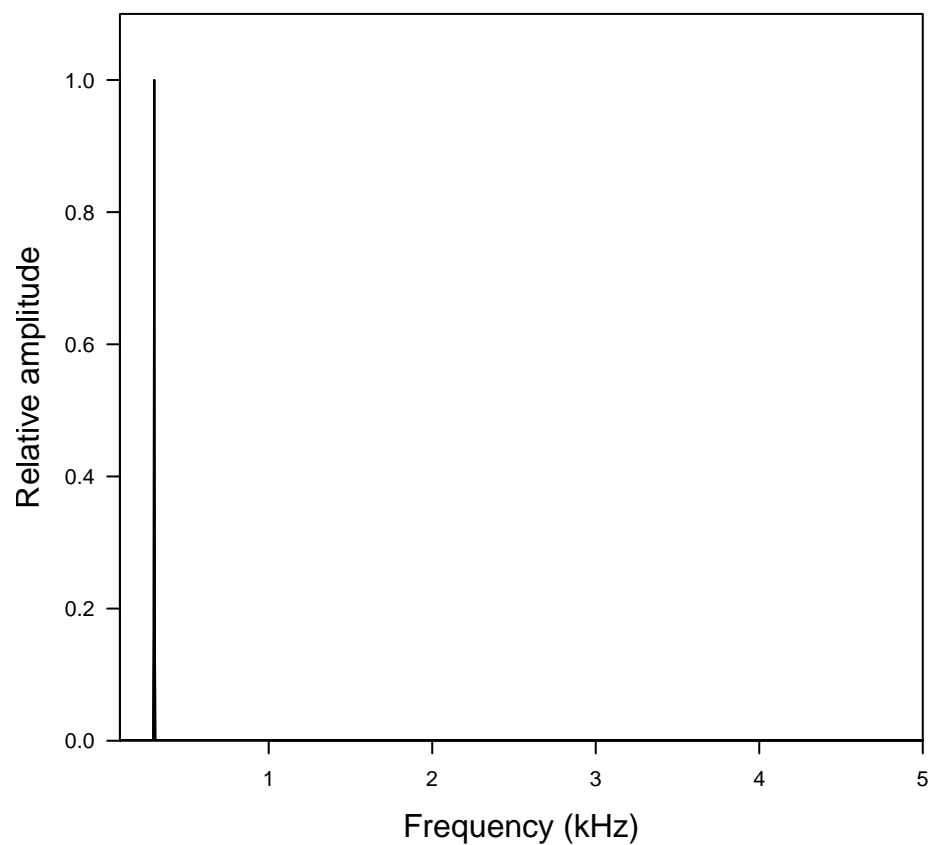

Vel. = 0.014 ; Str. = Receptacle ; Axis = z ; Fl. accession = 10-s-79-2

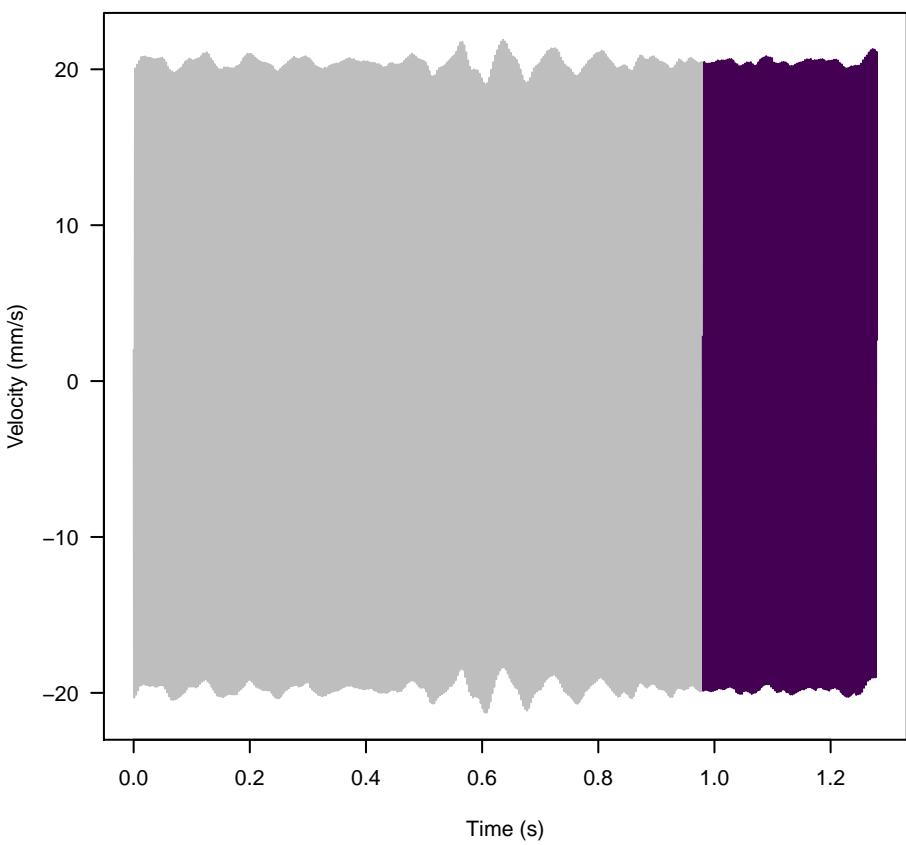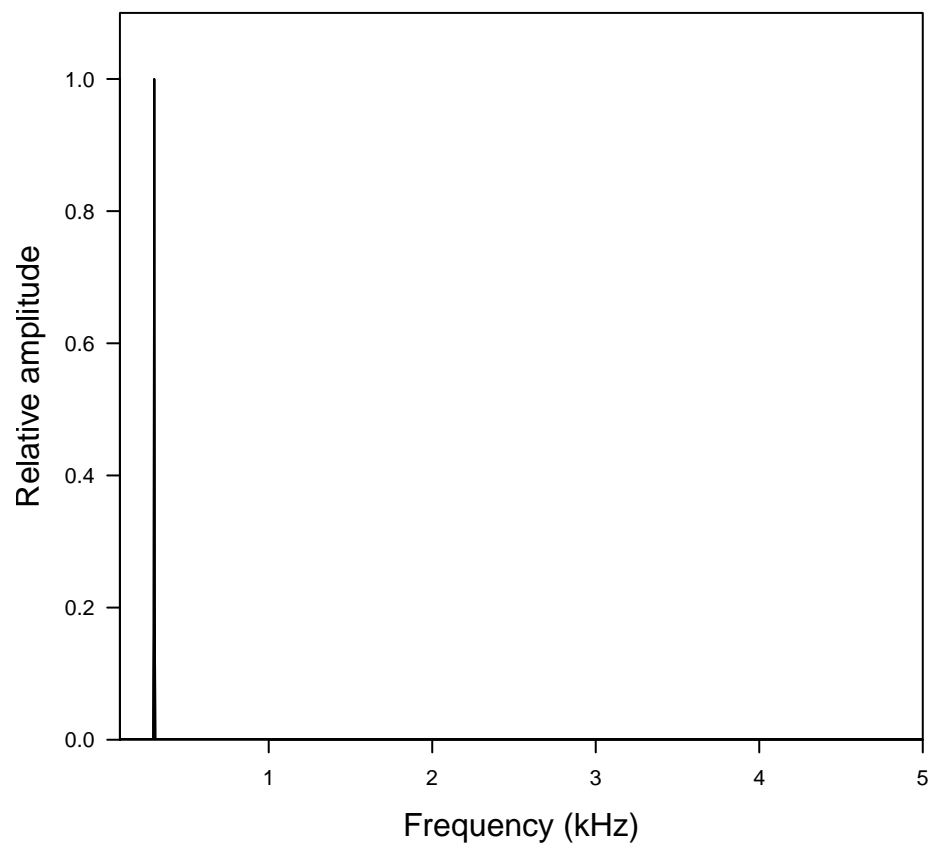

Vel. = 0.014 ; Str. = PA ; Axis = z ; Fl. accession = 10-s-79-2

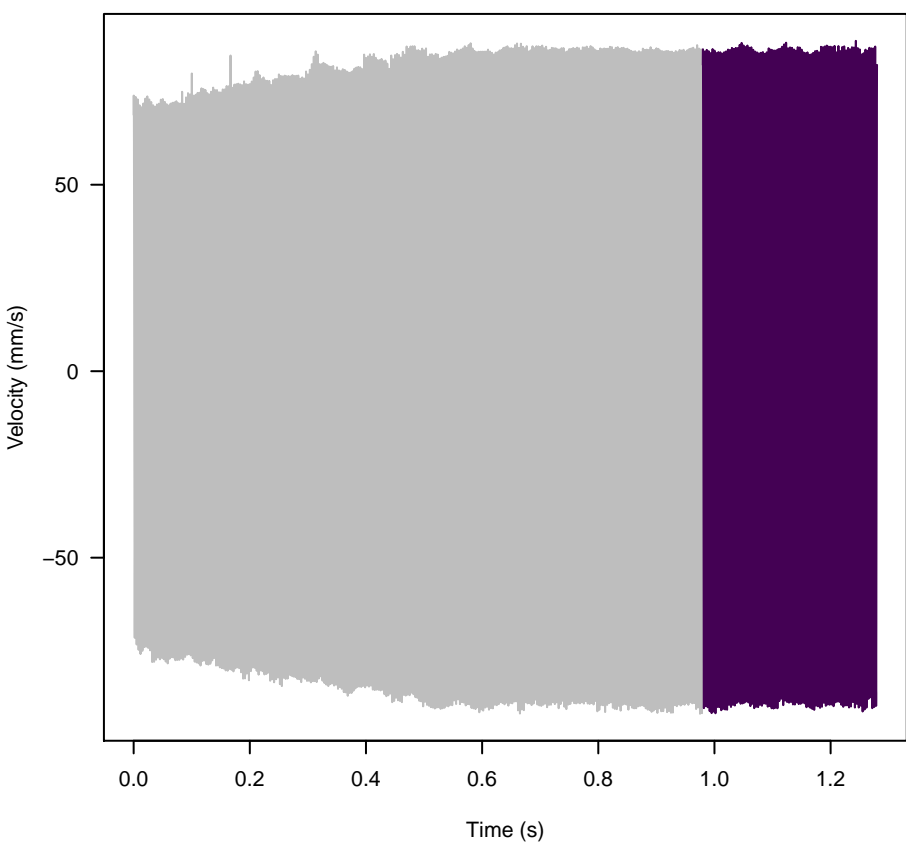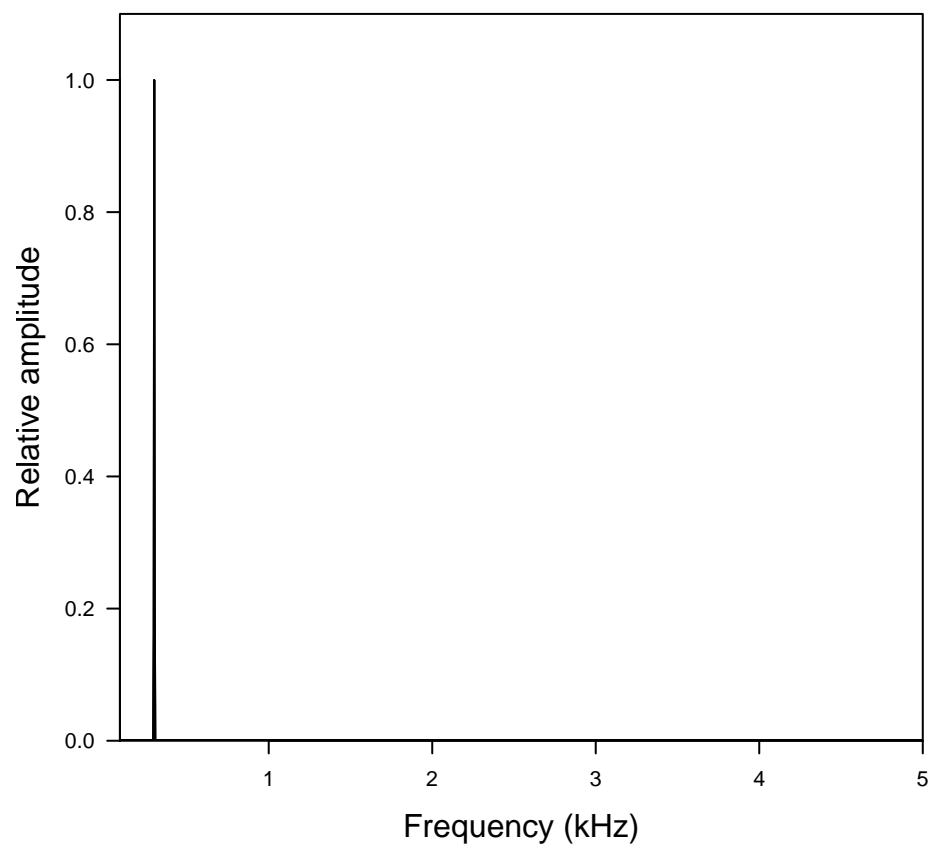

Vel. = 0.014 ; Str. = Receptacle ; Axis = z ; Fl. accession = 10-s-79-2

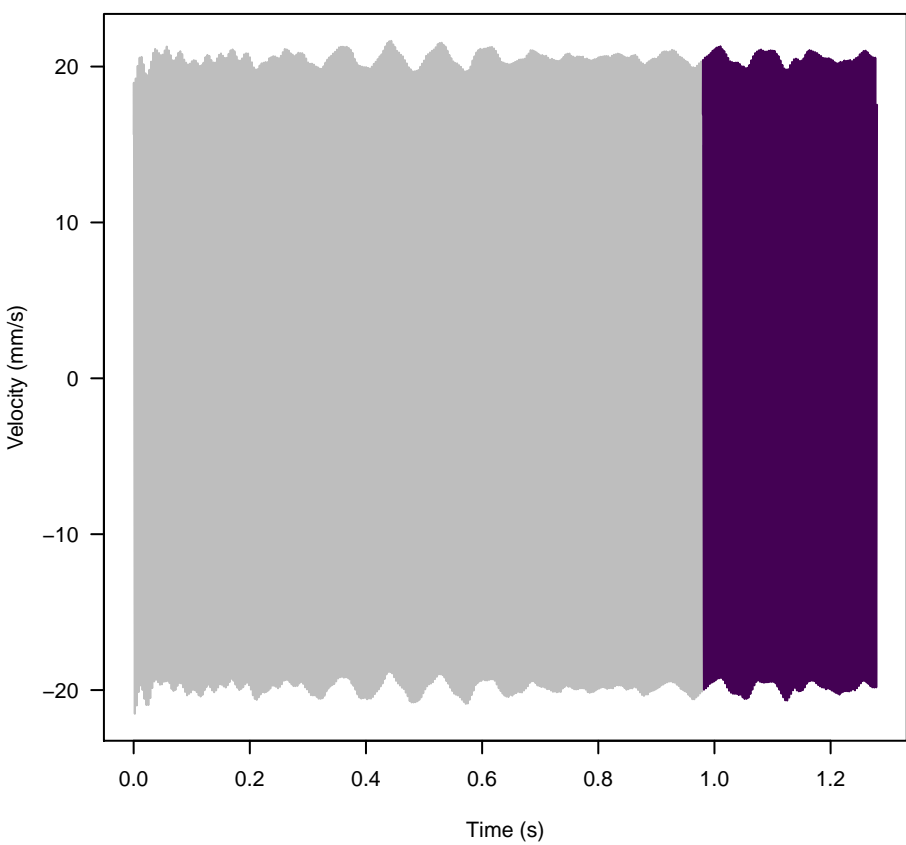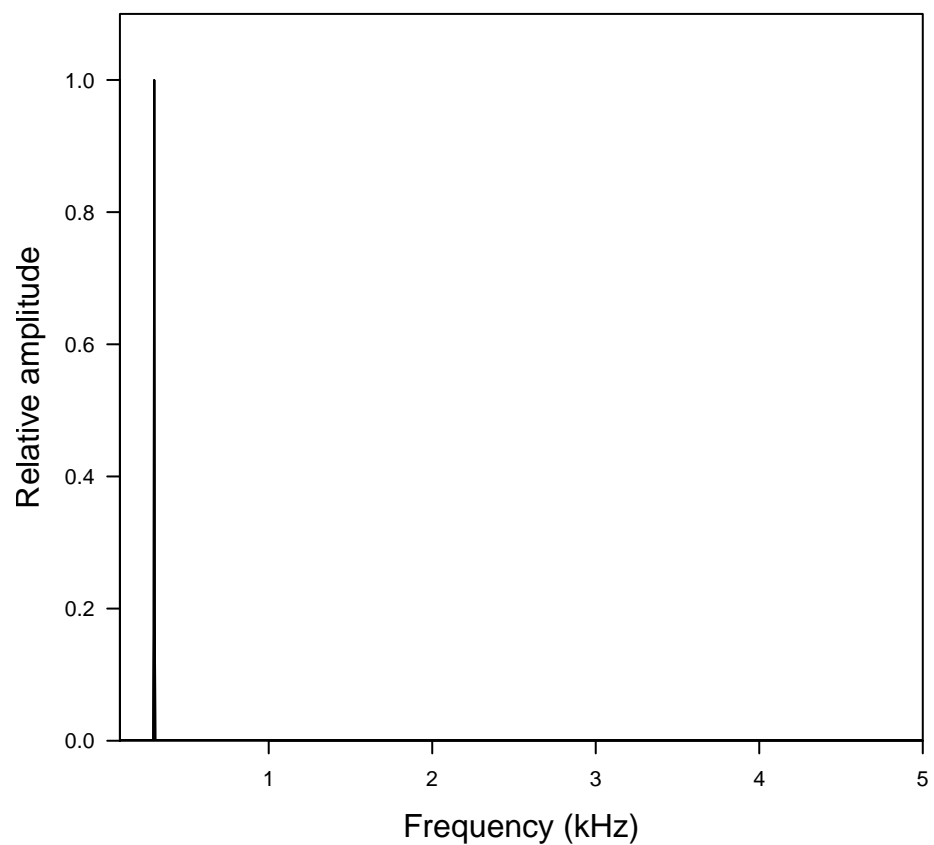

Vel. = 0.028 ; Str. = PA ; Axis = z ; Fl. accession = 10-s-79-2

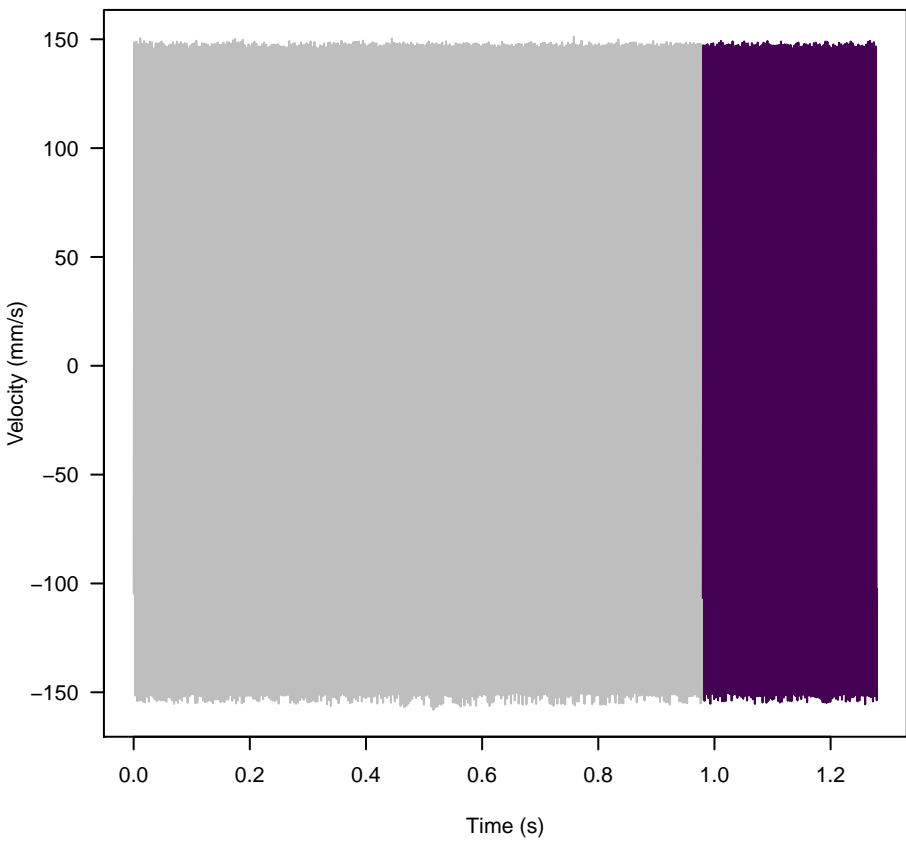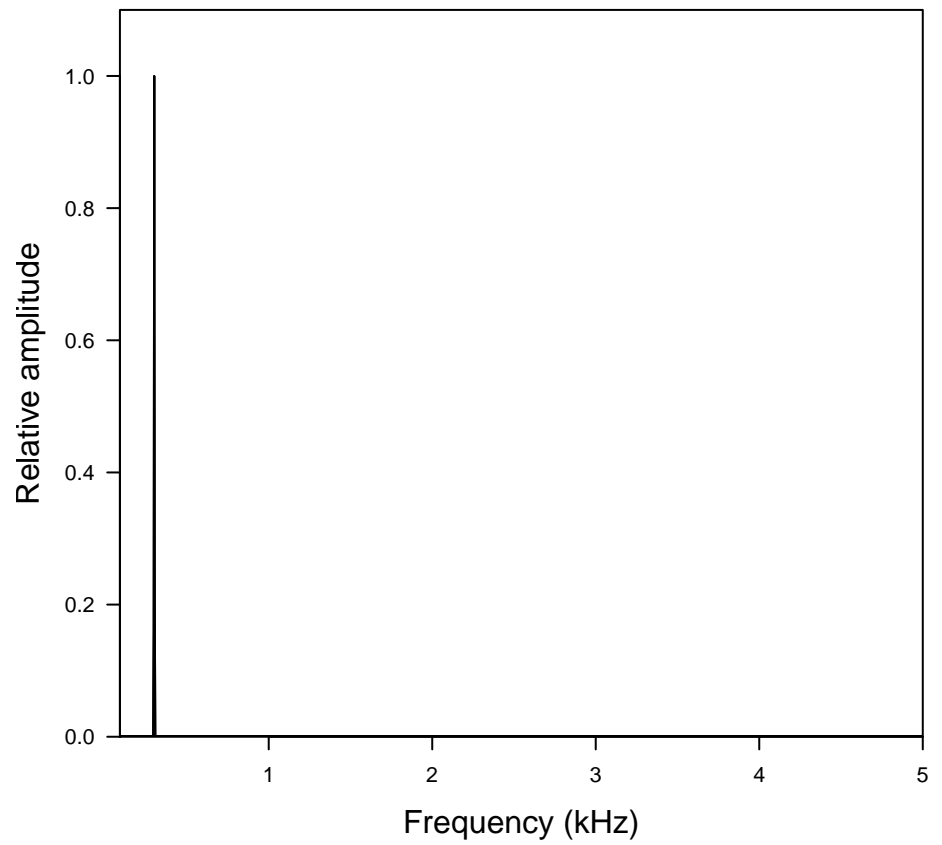

Vel. = 0.028 ; Str. = Receptacle ; Axis = z ; Fl. accession = 10-s-79-2

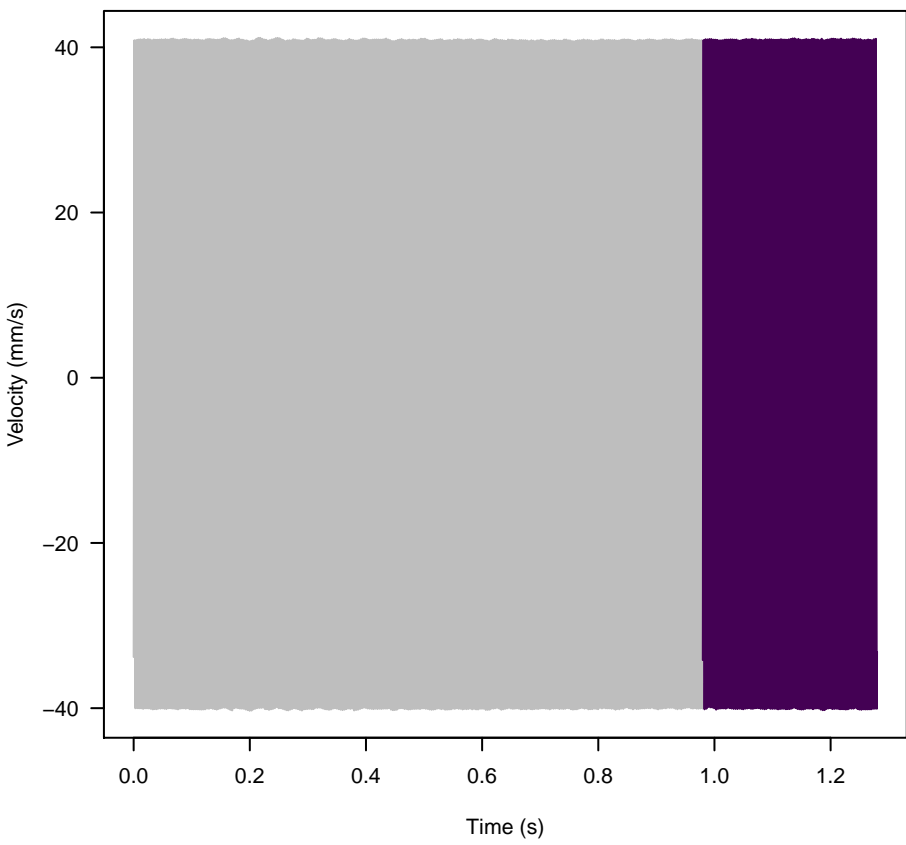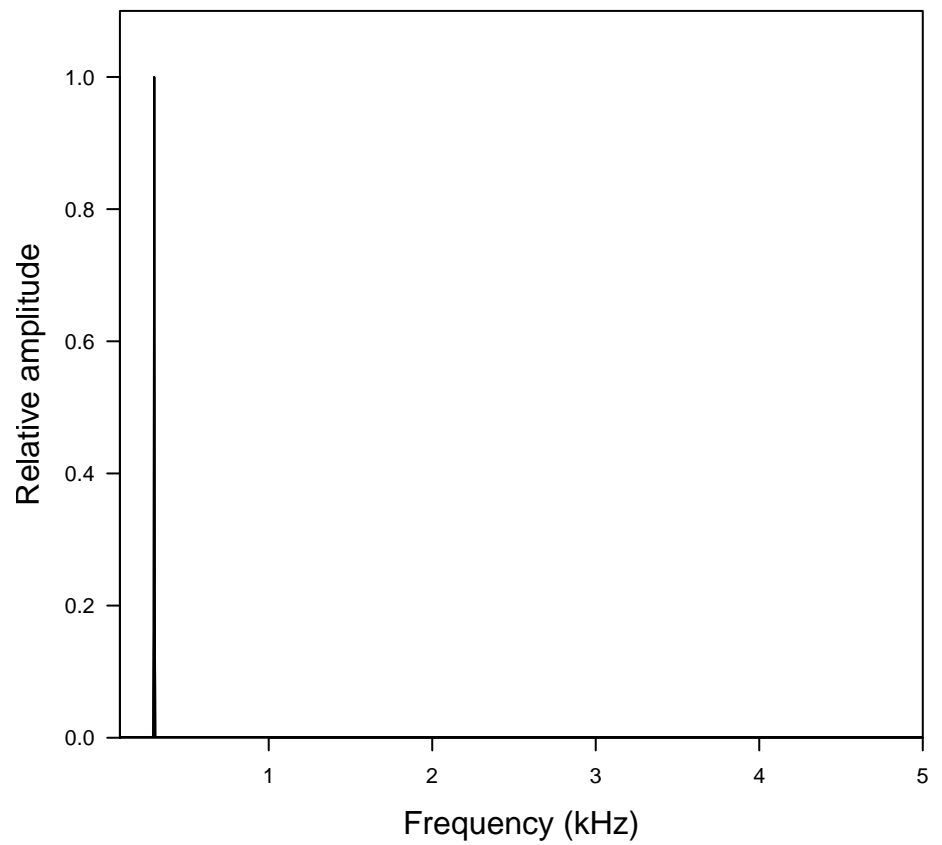

Vel. = 0.028 ; Str. = FA ; Axis = z ; Fl. accession = 10-s-79-2

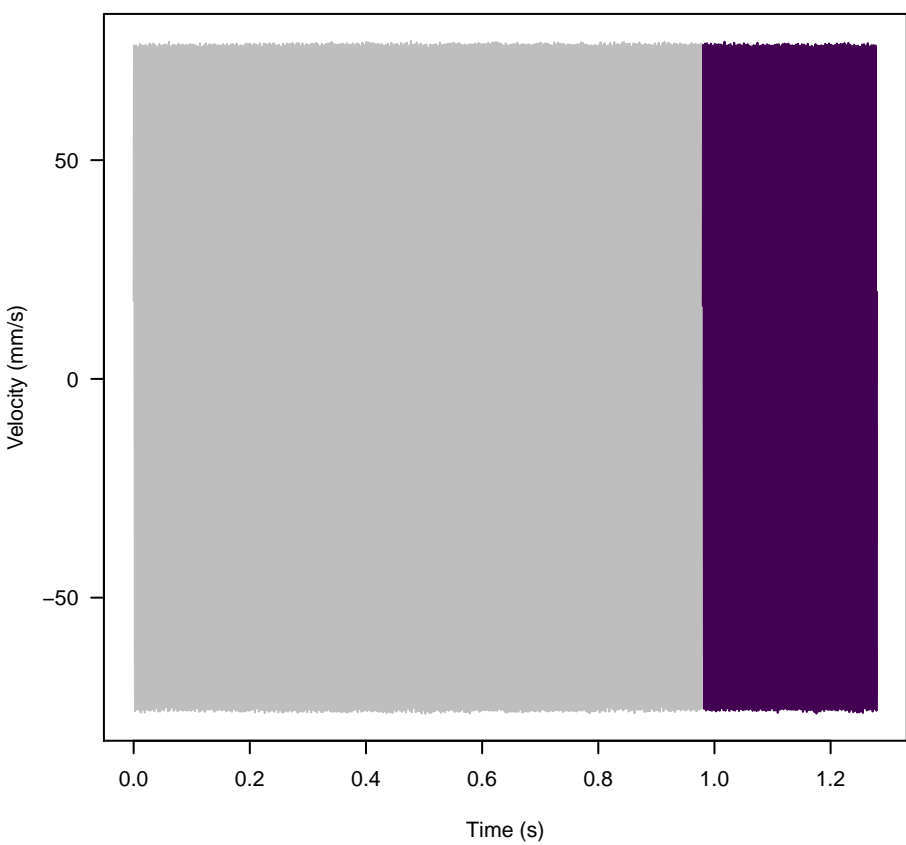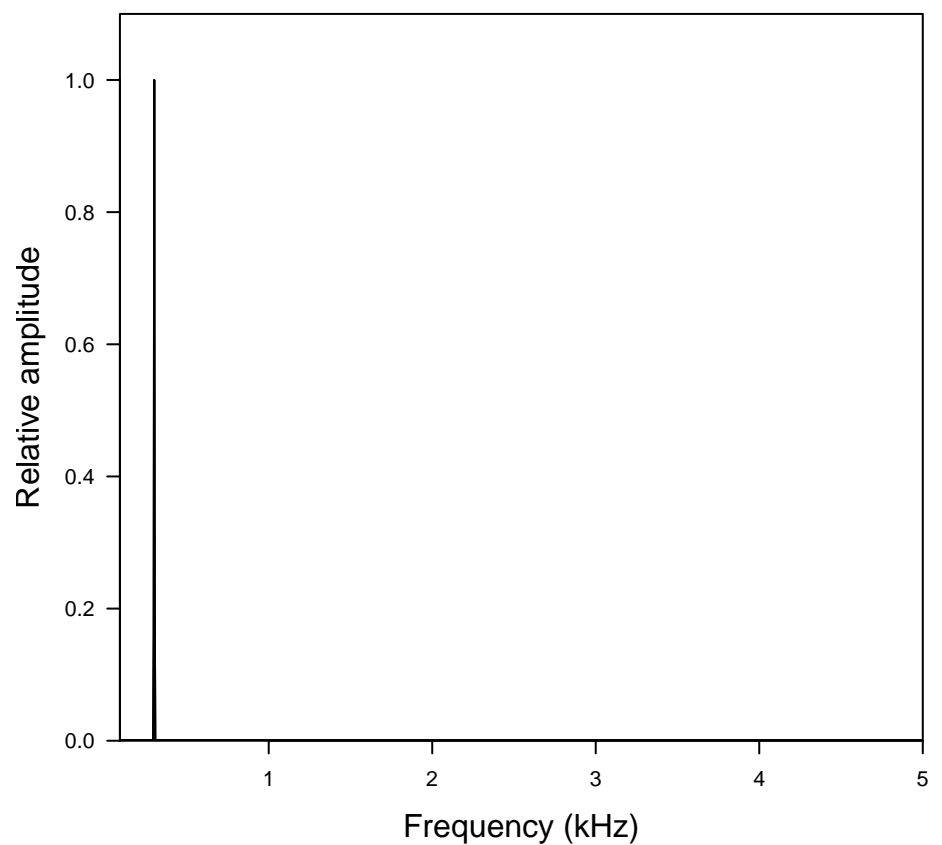

Vel. = 0.028 ; Str. = Receptacle ; Axis = z ; Fl. accession = 10-s-79-2

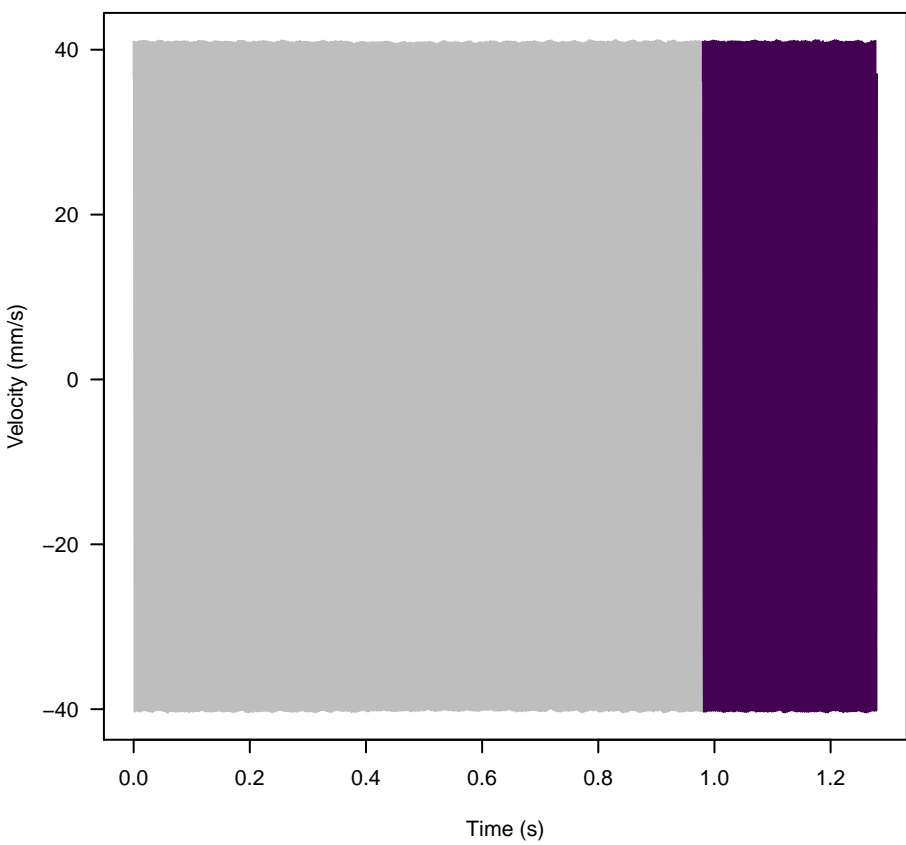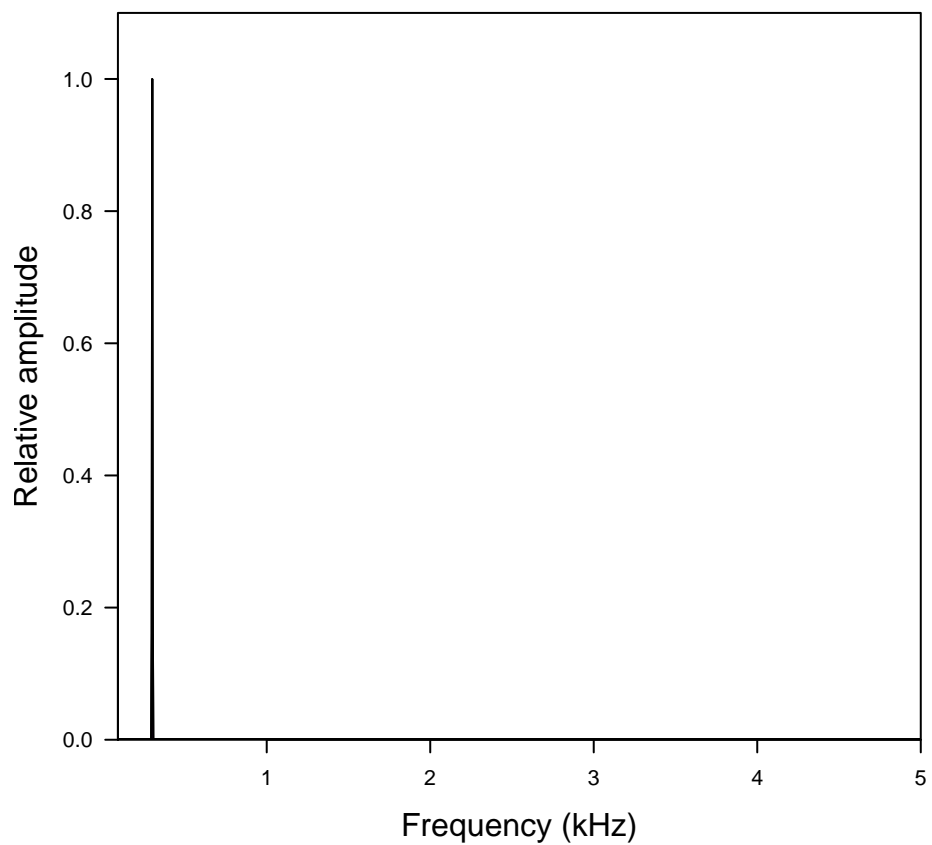

Vel. = 0.028 ; Str. = Corolla ; Axis = z ; Fl. accession = 10-s-79-2

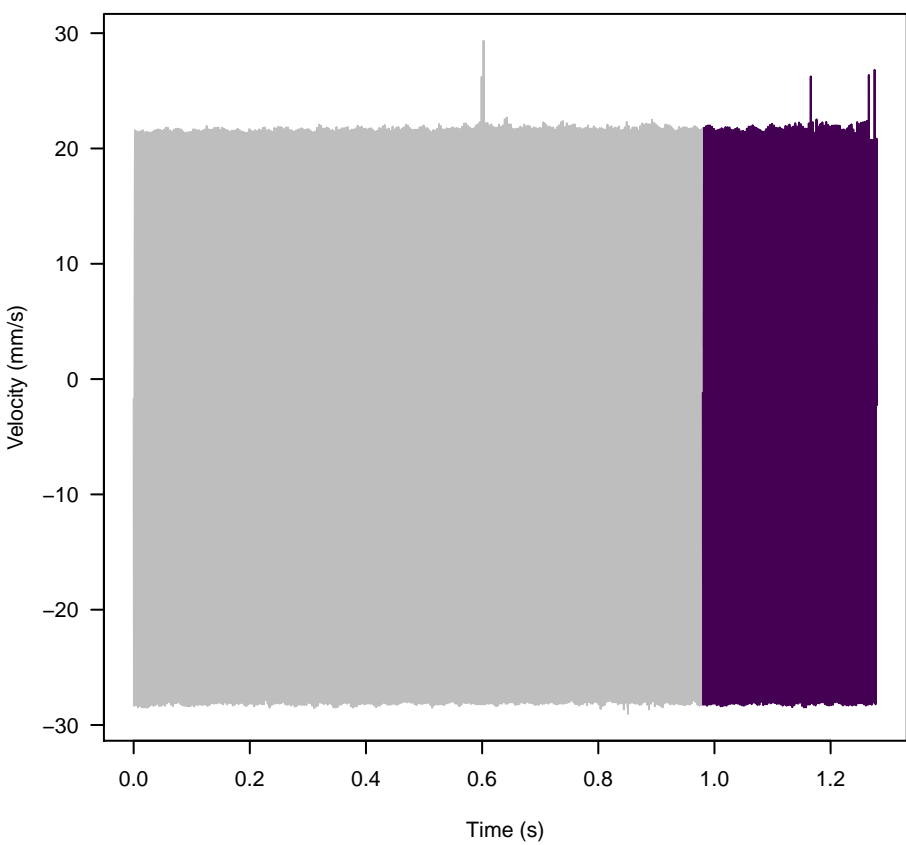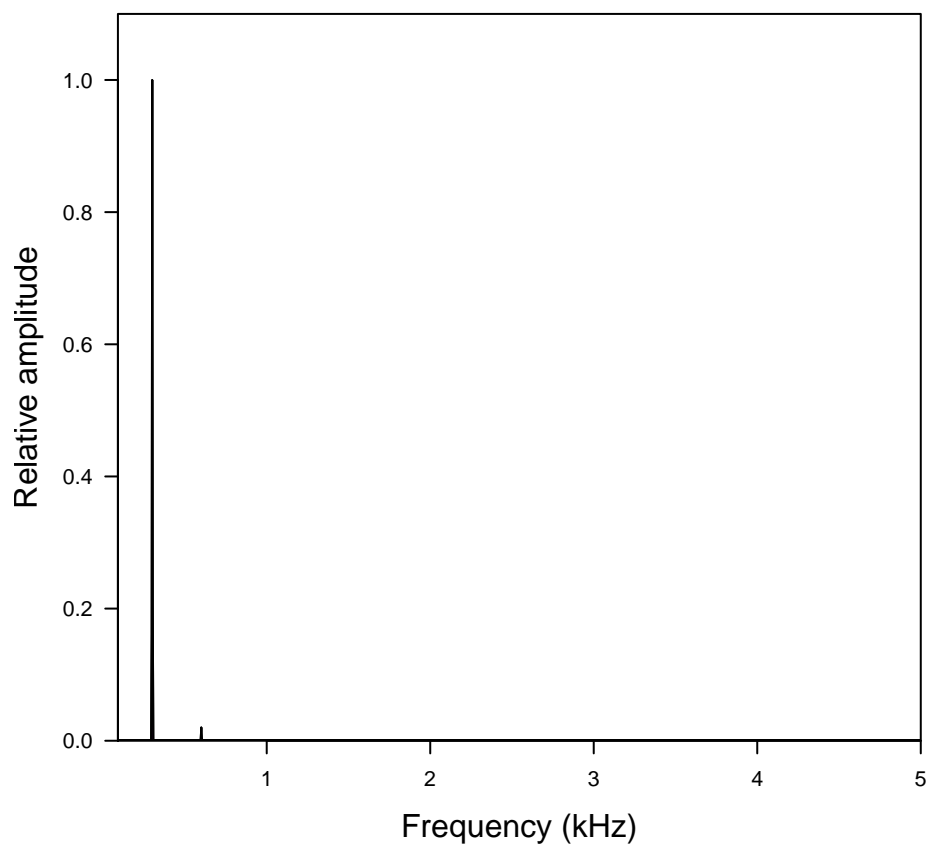

Vel. = 0.028 ; Str. = Receptacle ; Axis = z ; Fl. accession = 10-s-79-2

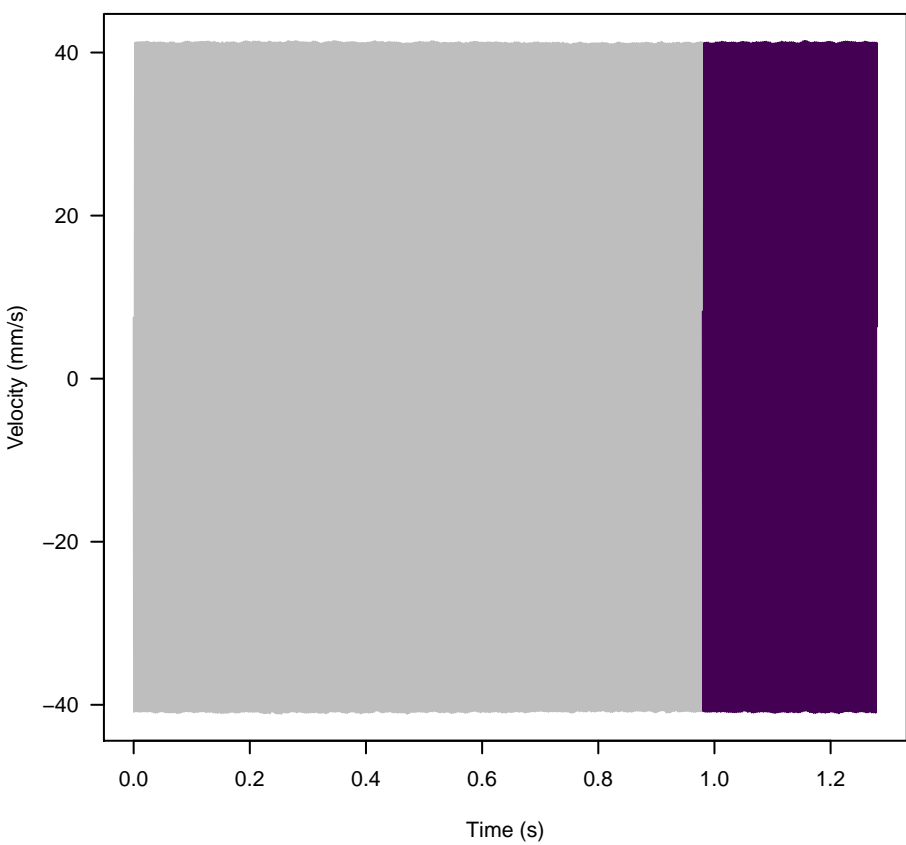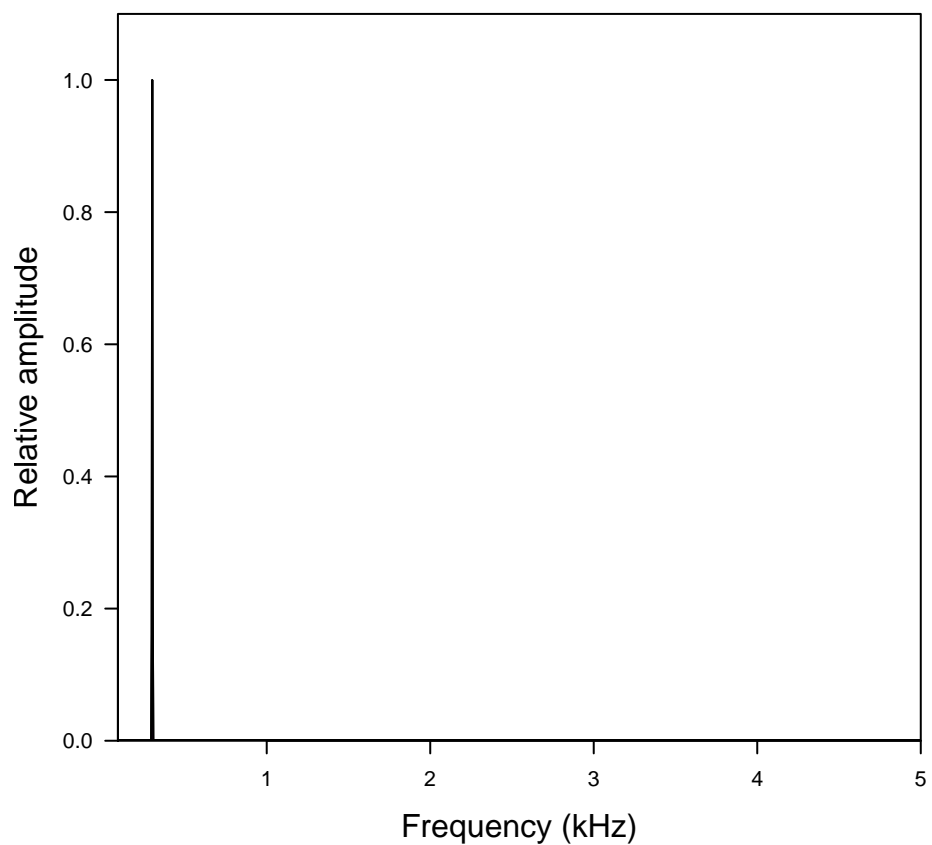



Vel. = 0.057 ; Str. = Corolla ; Axis = z ; Fl. accession = 10-s-79-2

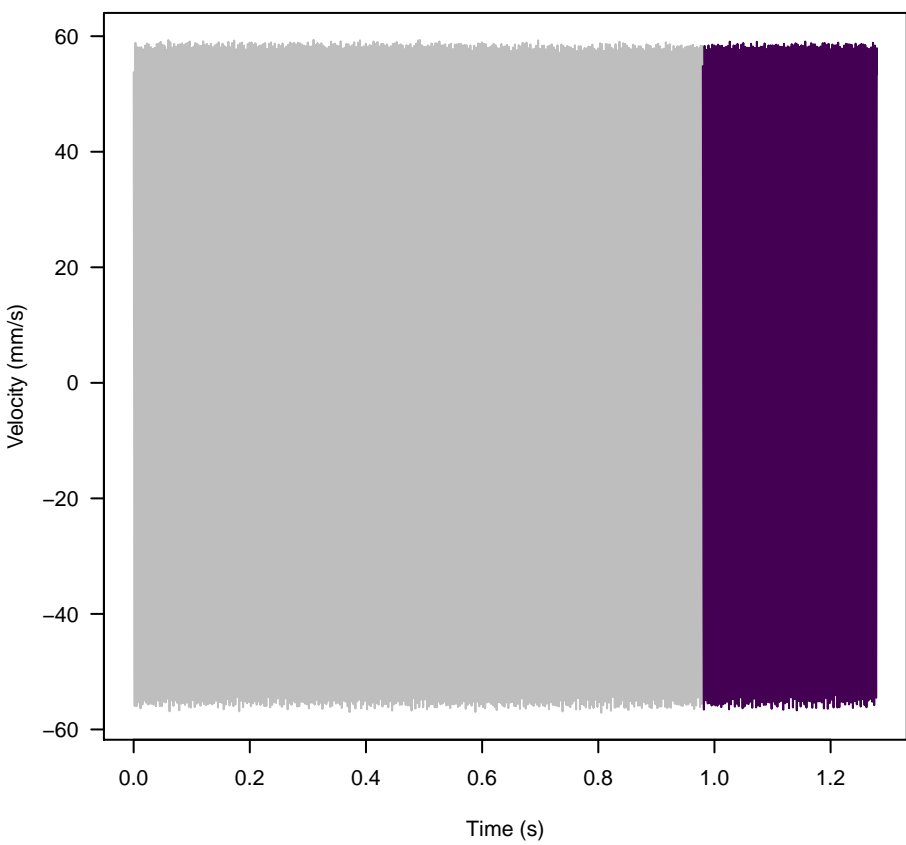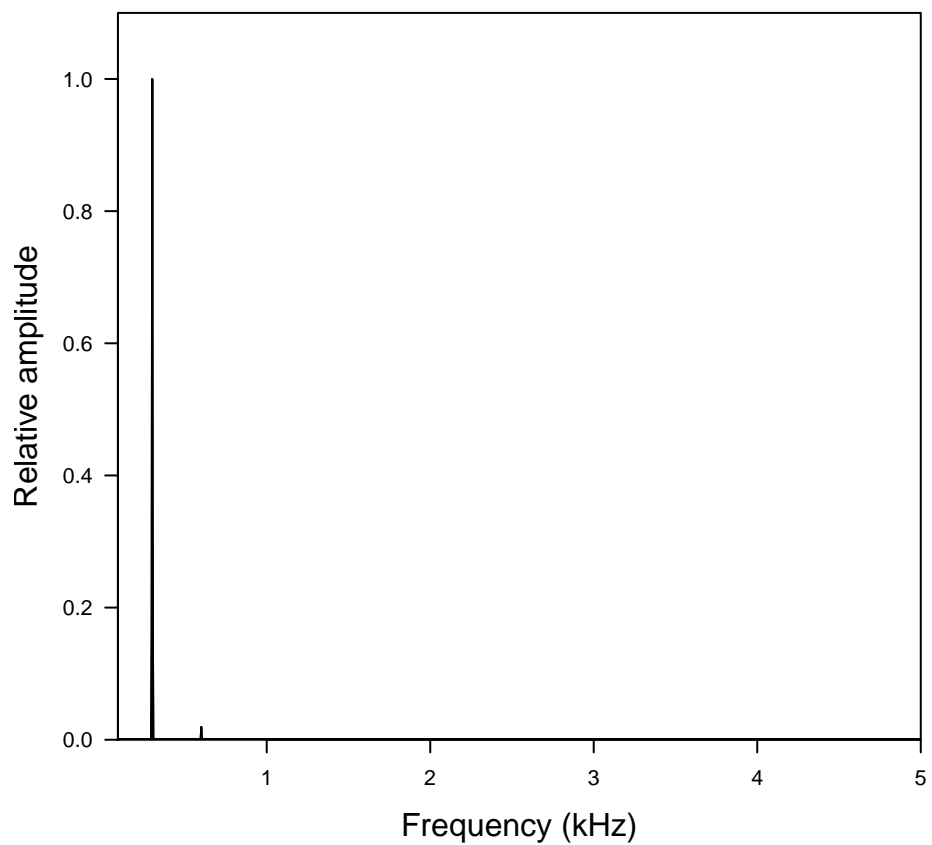

Vel. = 0.057 ; Str. = Receptacle ; Axis = z ; Fl. accession = 10-s-79-2

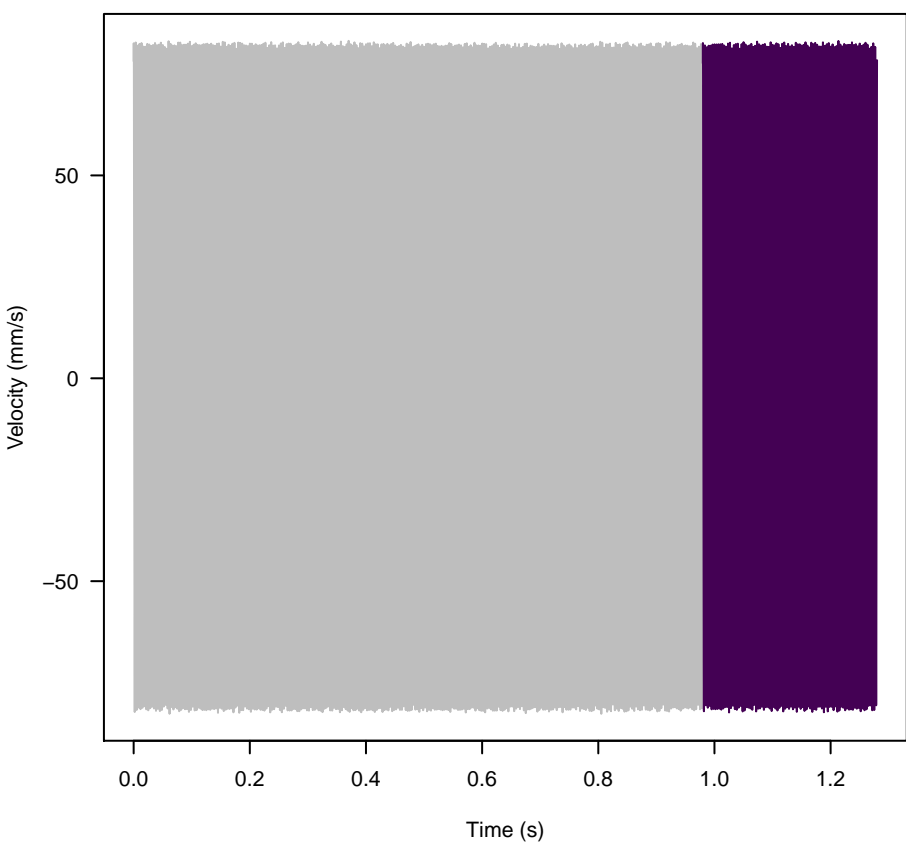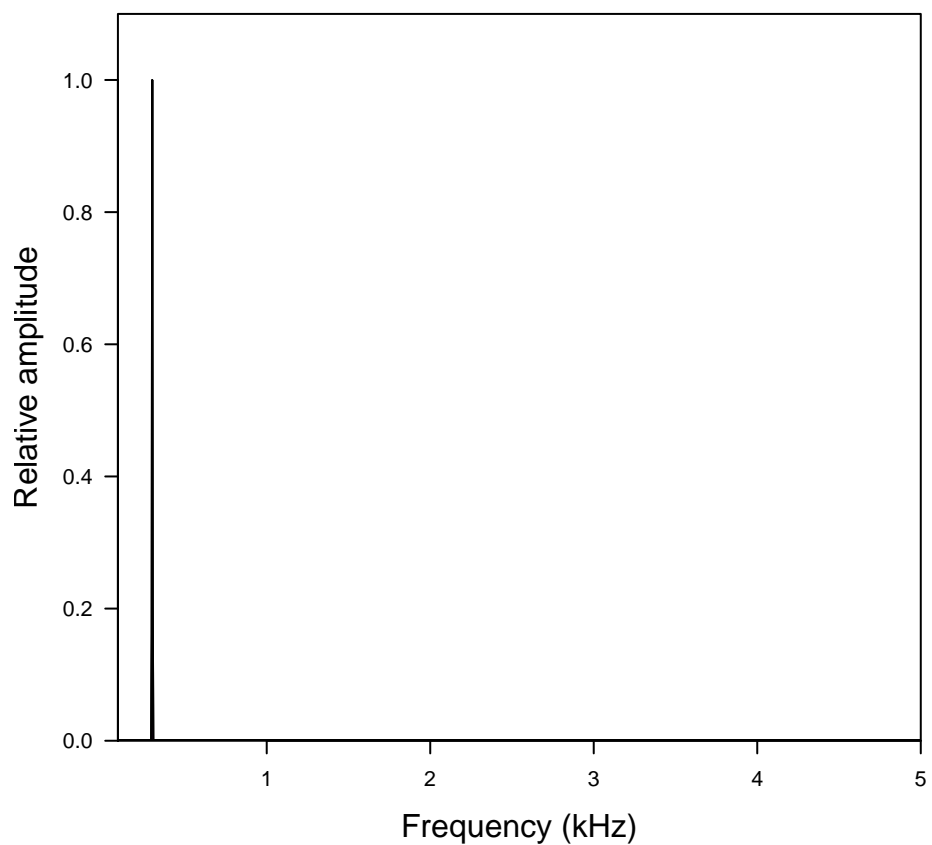

Vel. = 0.057 ; Str. = FA ; Axis = z ; Fl. accession = 10-s-79-2

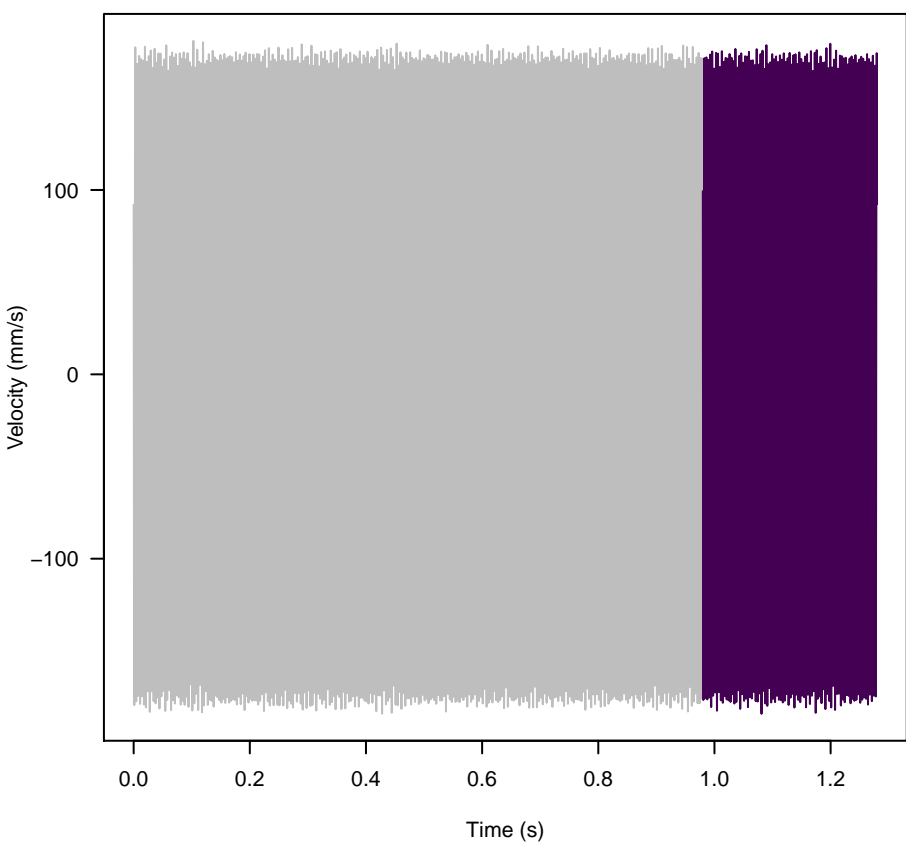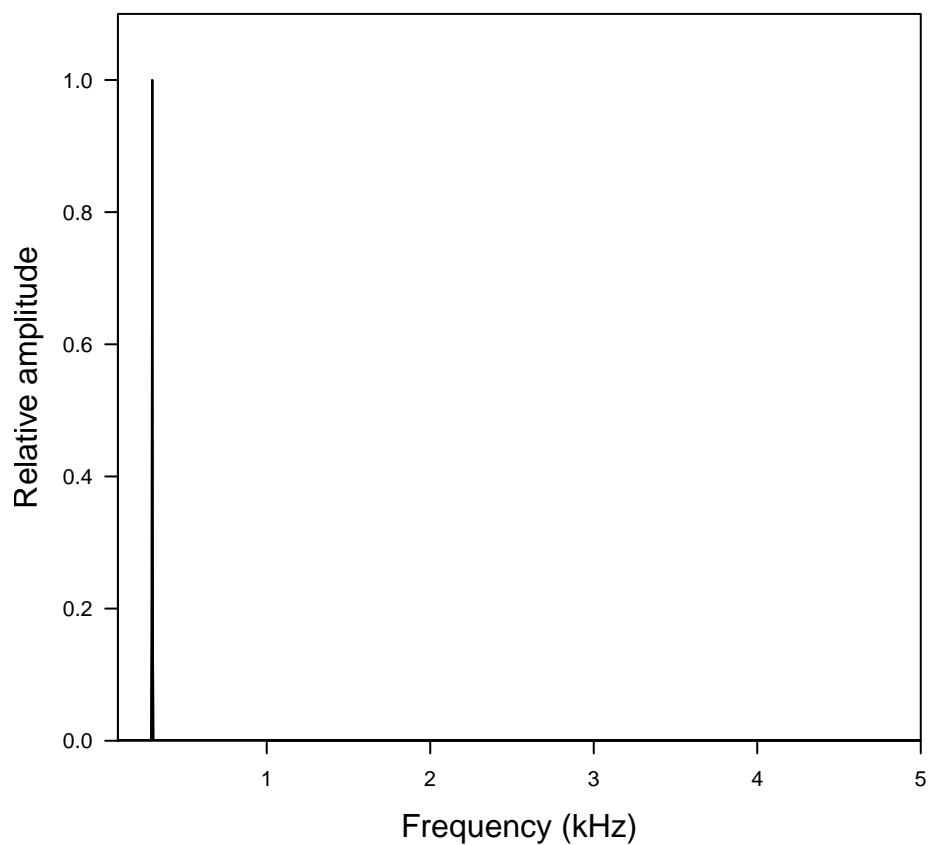

Vel. = 0.057 ; Str. = Receptacle ; Axis = z ; Fl. accession = 10-s-79-2

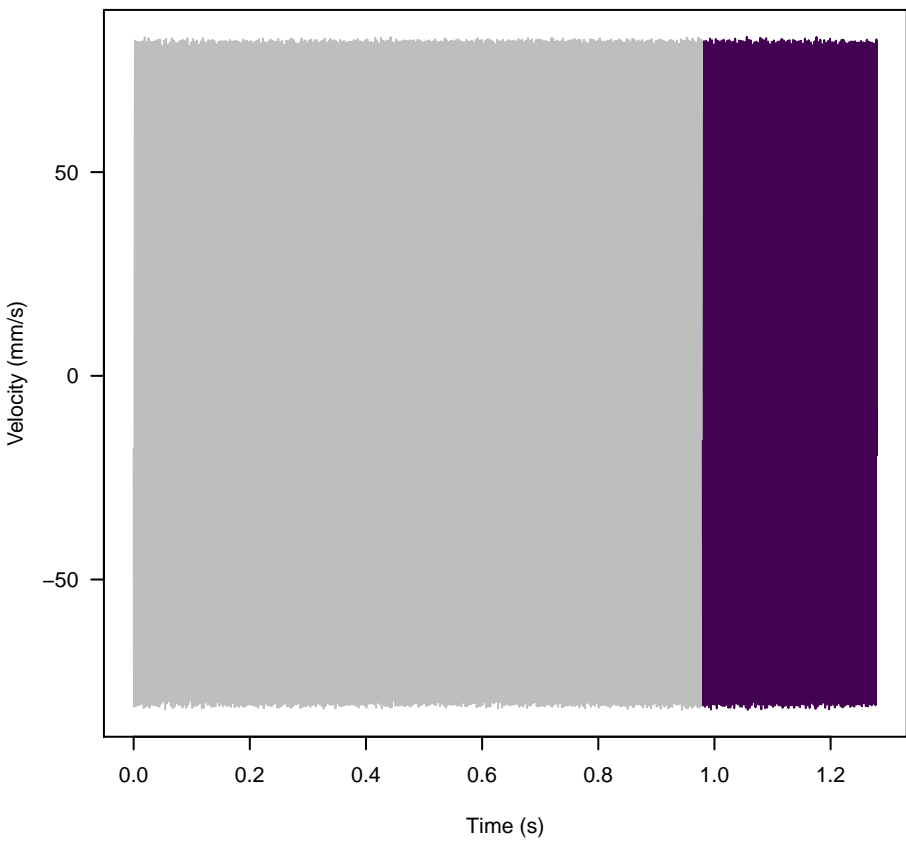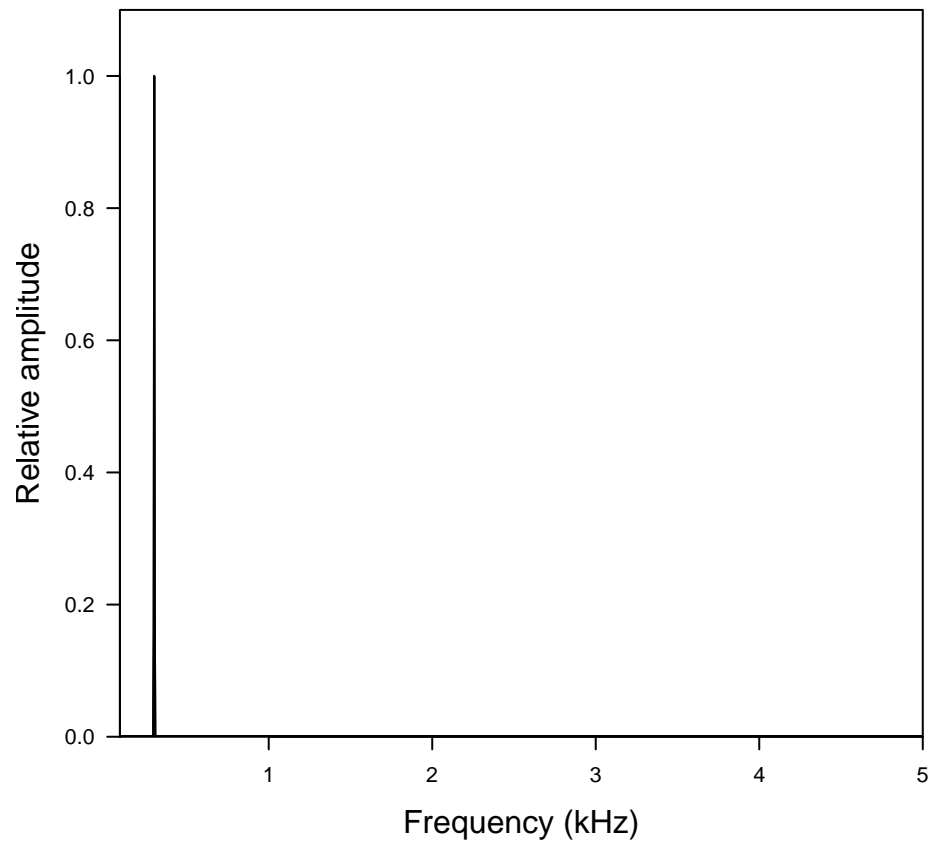

Vel. = 0.057 ; Str. = PA ; Axis = z ; Fl. accession = 10-s-79-2

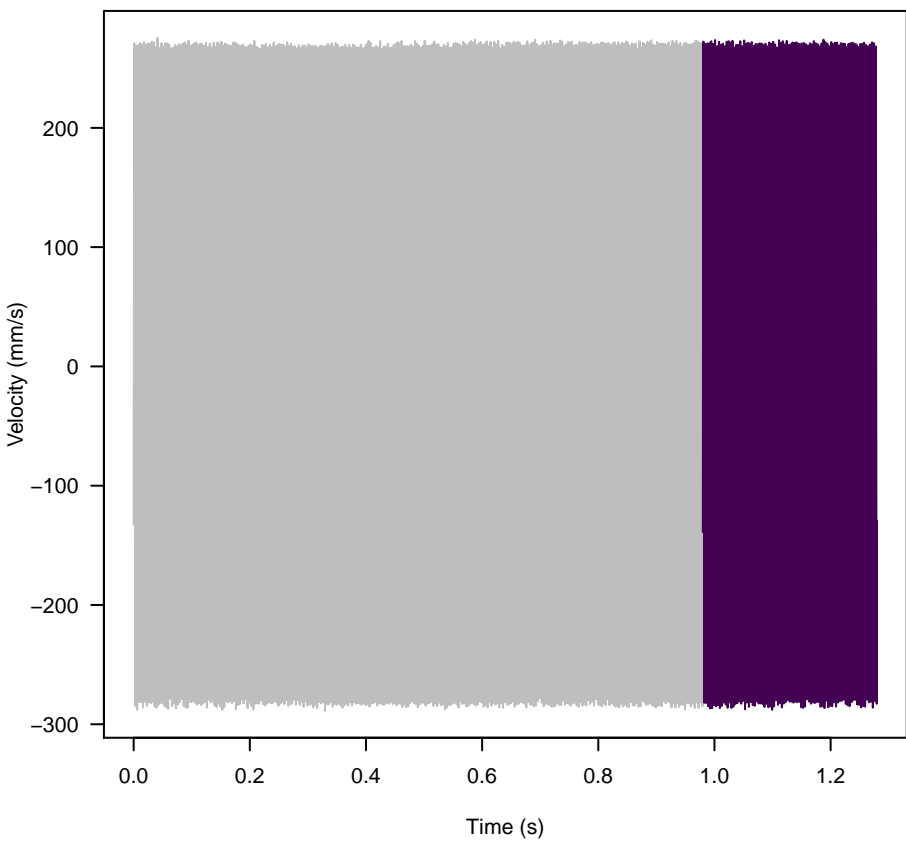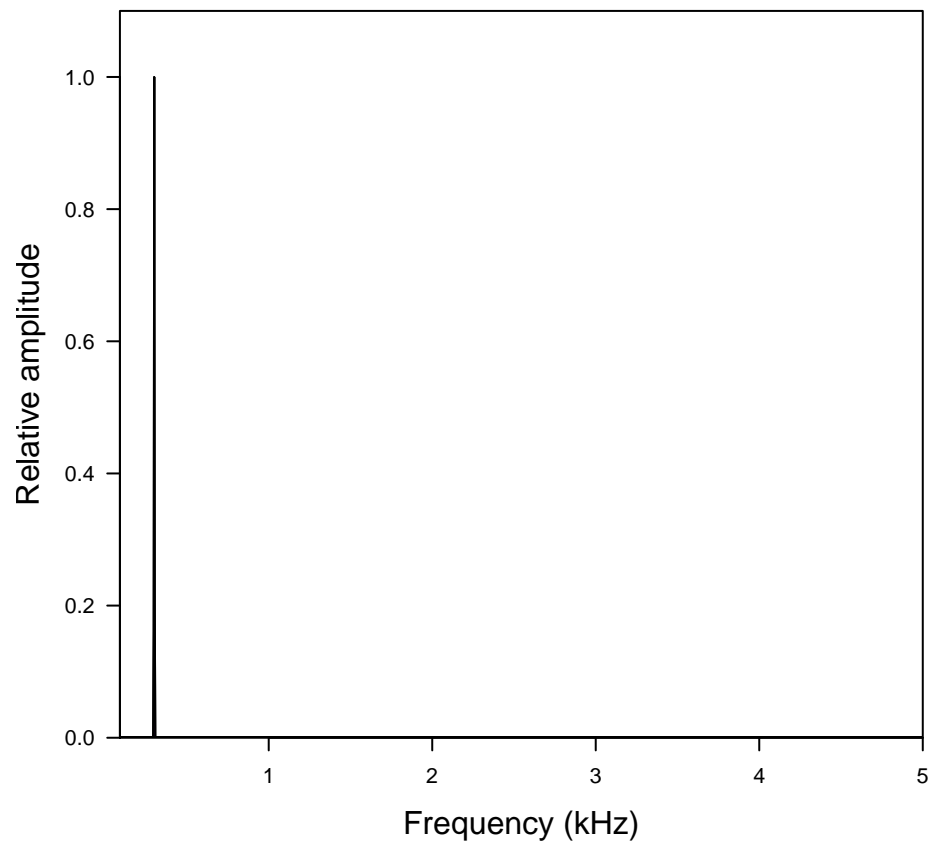

Vel. = 0.057 ; Str. = Receptacle ; Axis = z ; Fl. accession = 10-s-79-2

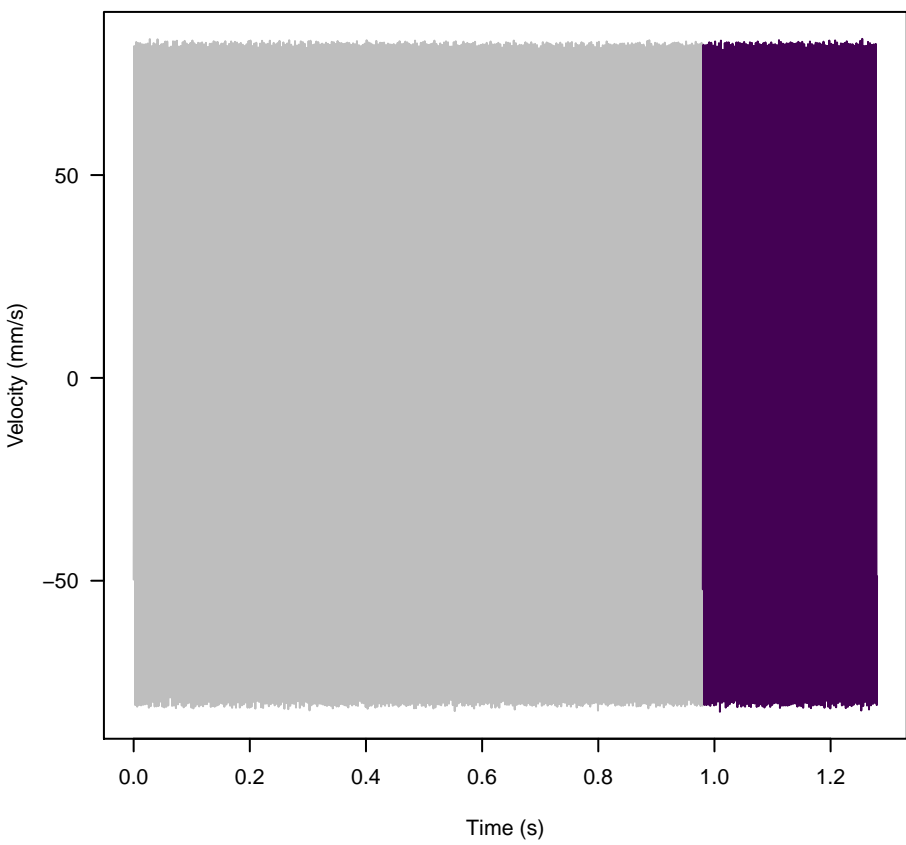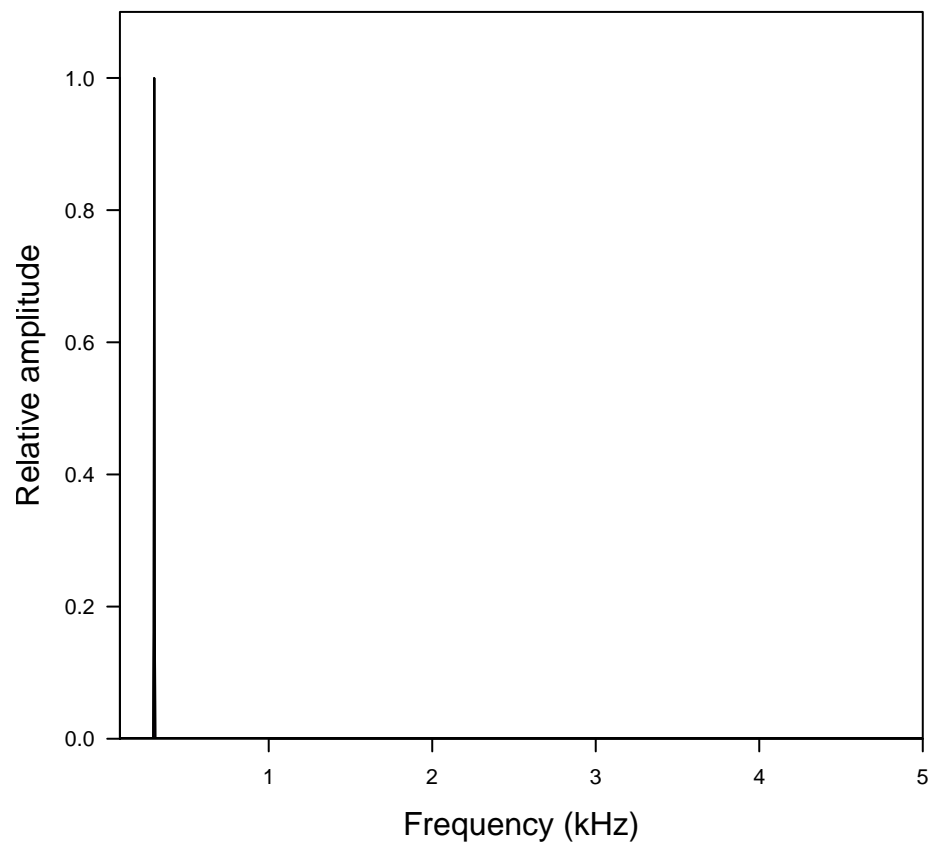

Vel. = 0.057 ; Str. = Corolla ; Axis = x ; Fl. accession = 10-s-79-2

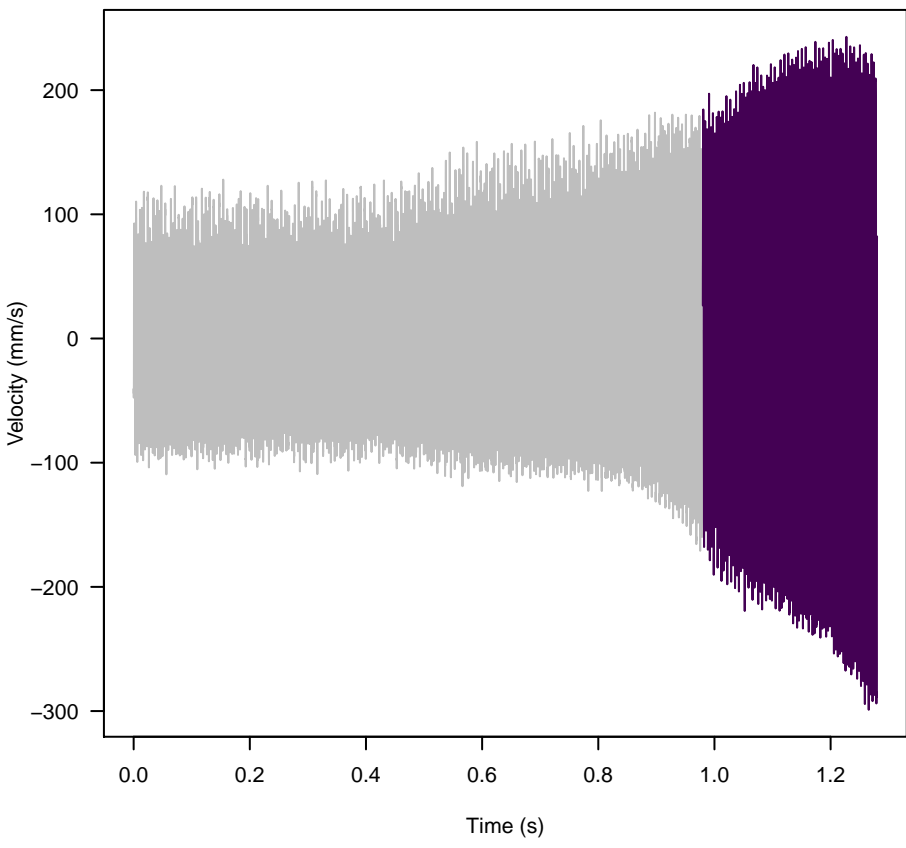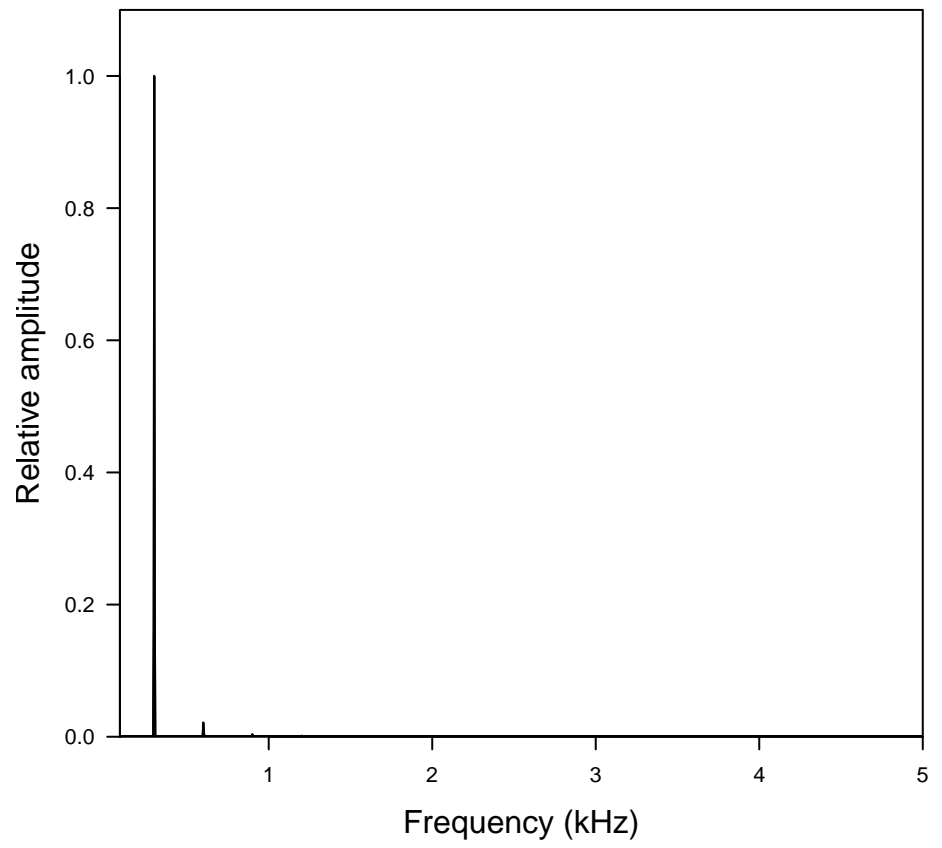

Vel. = 0.057 ; Str. = Receptacle ; Axis = x ; Fl. accession = 10-s-79-2

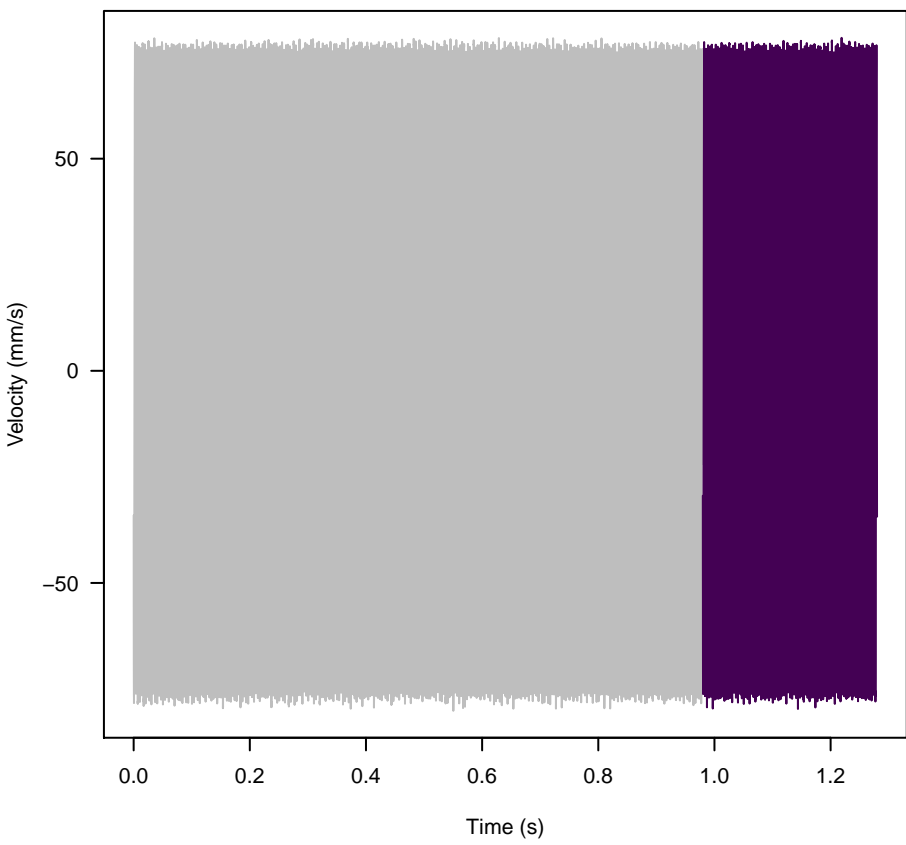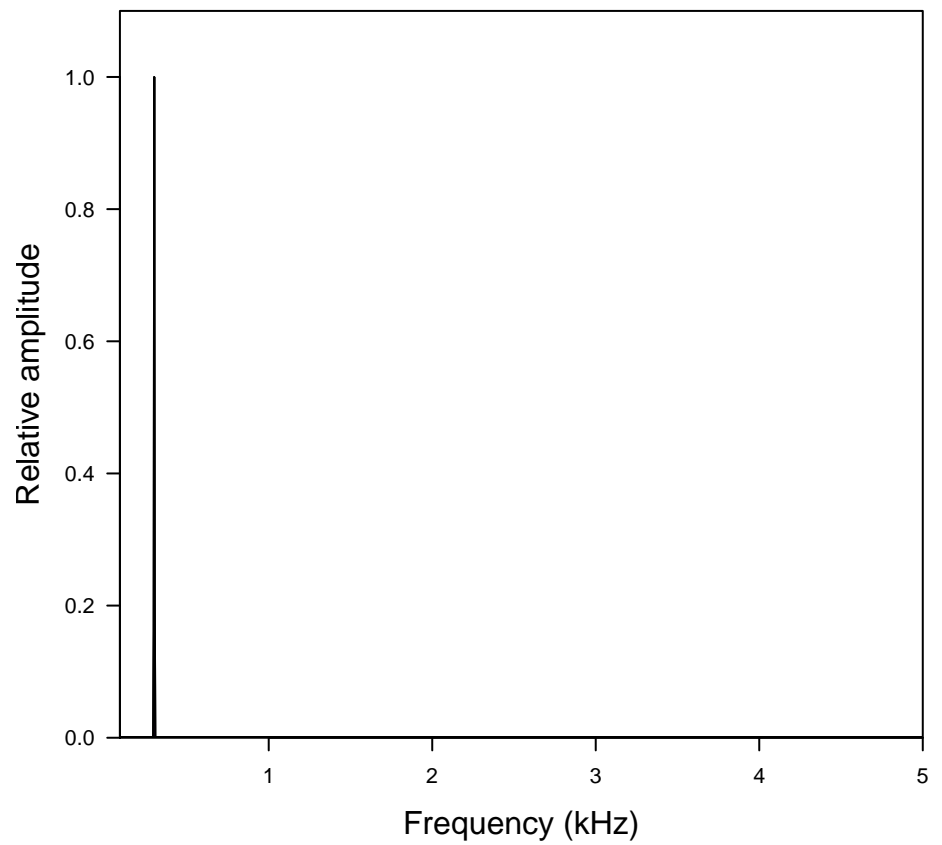

Vel. = 0.057 ; Str. = FA ; Axis = x ; Fl. accession = 10-s-79-2

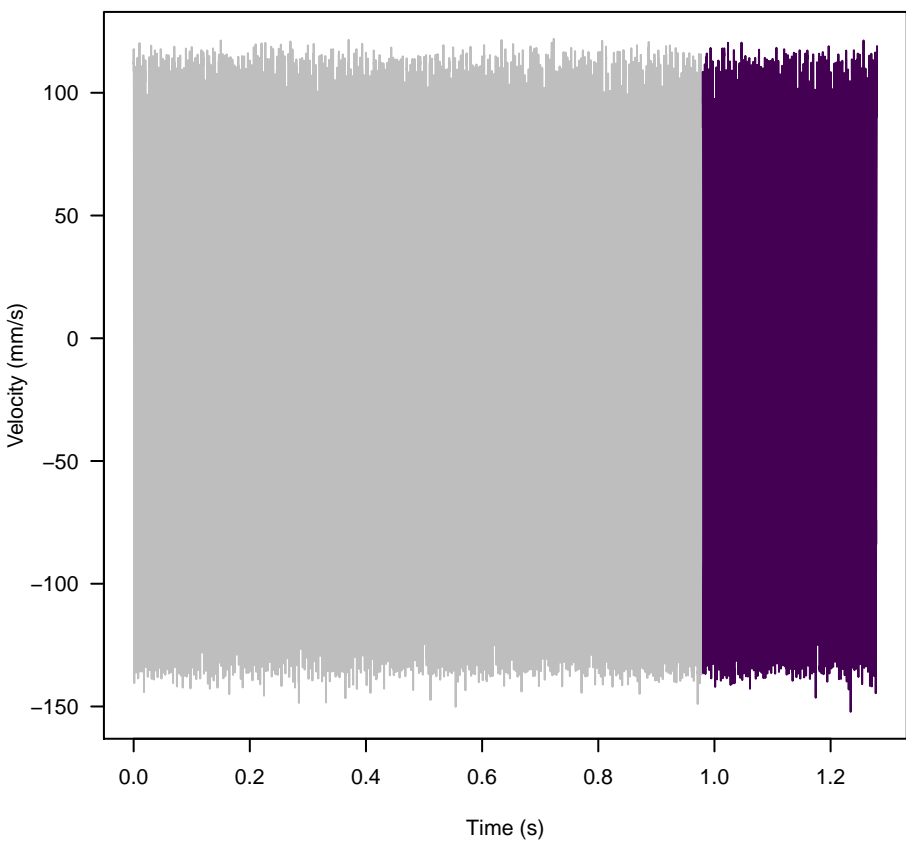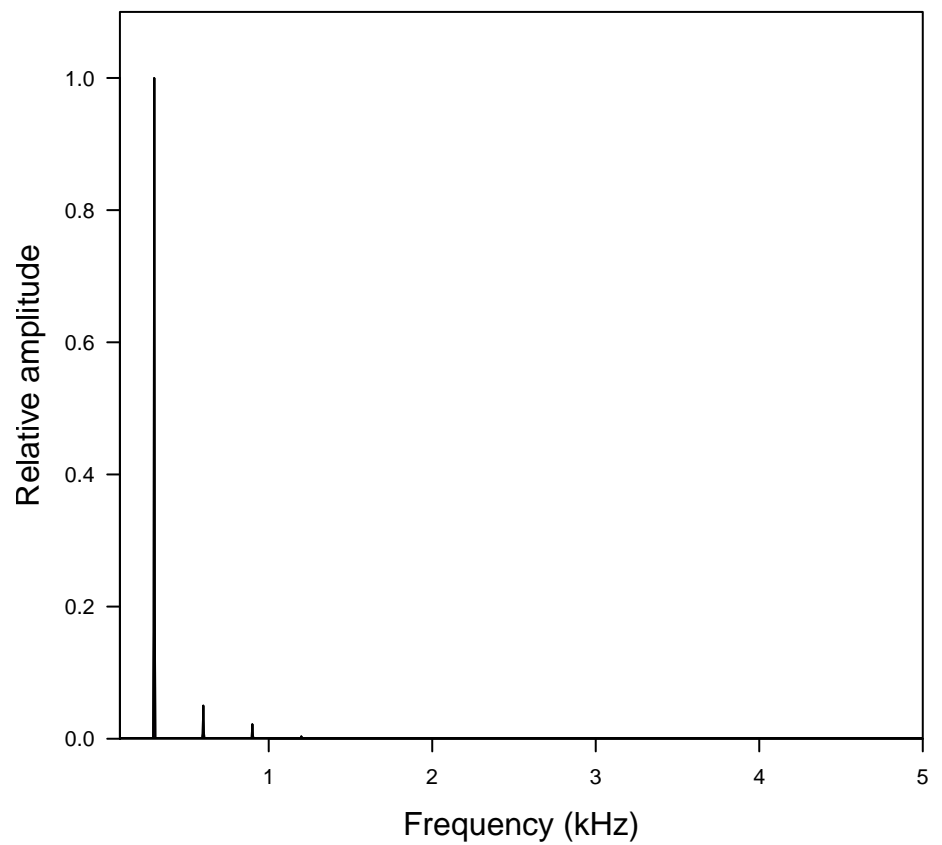

Vel. = 0.057 ; Str. = Receptacle ; Axis = x ; Fl. accession = 10-s-79-2

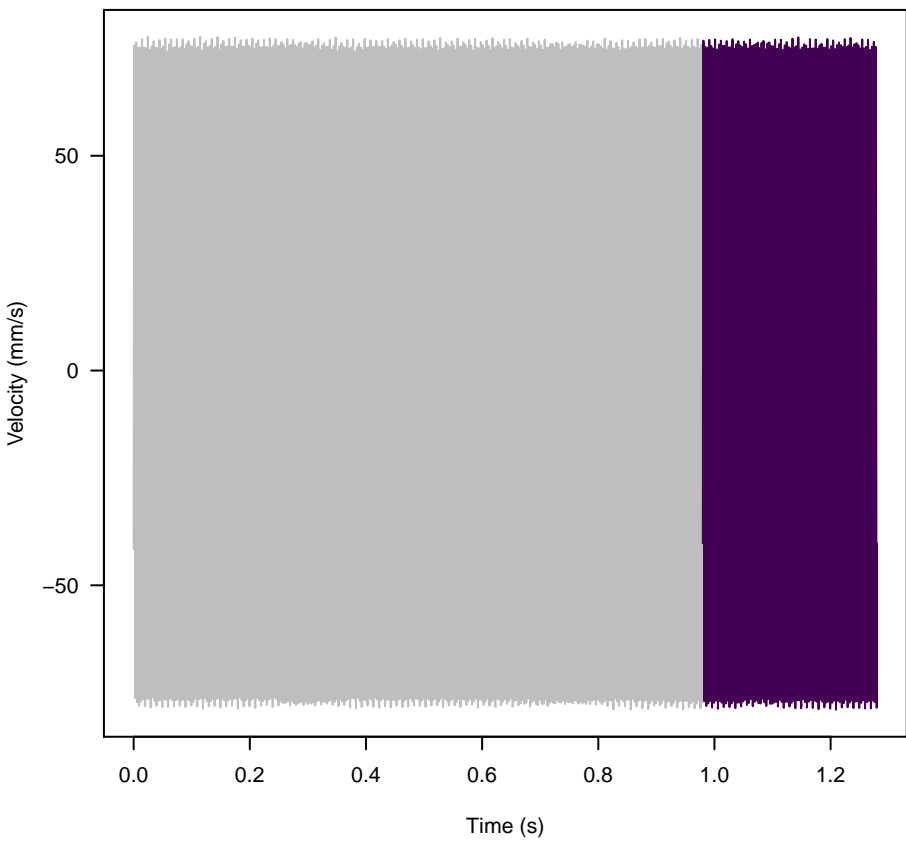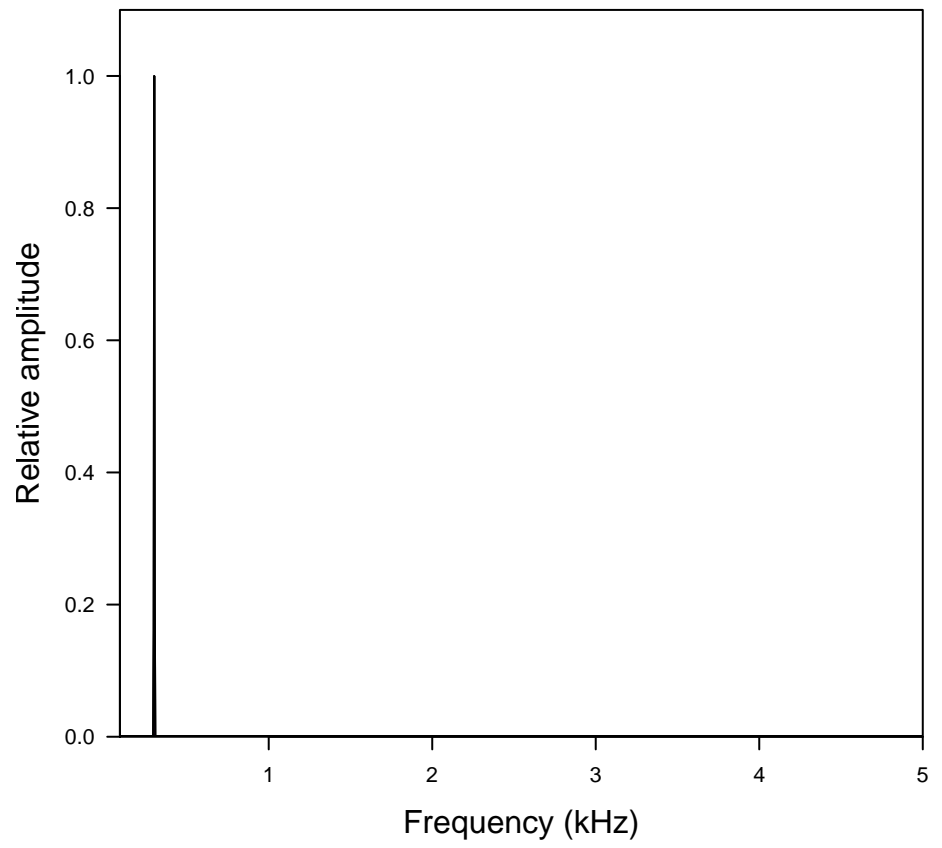

Vel. = 0.057 ; Str. = PA ; Axis = x ; Fl. accession = 10-s-79-2

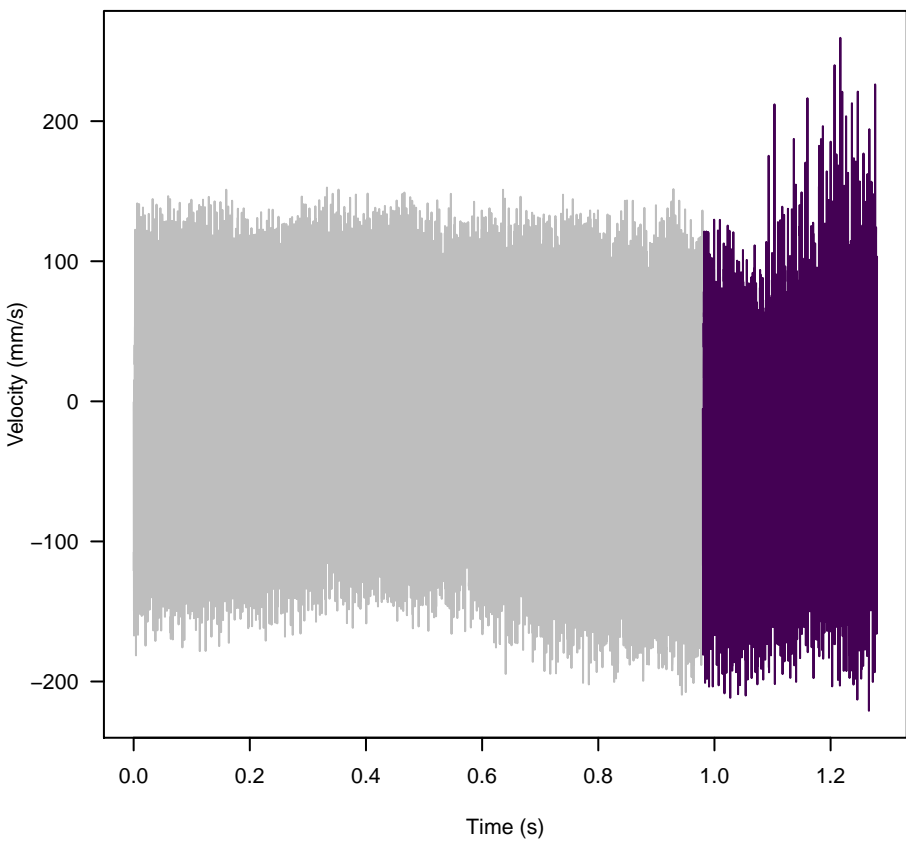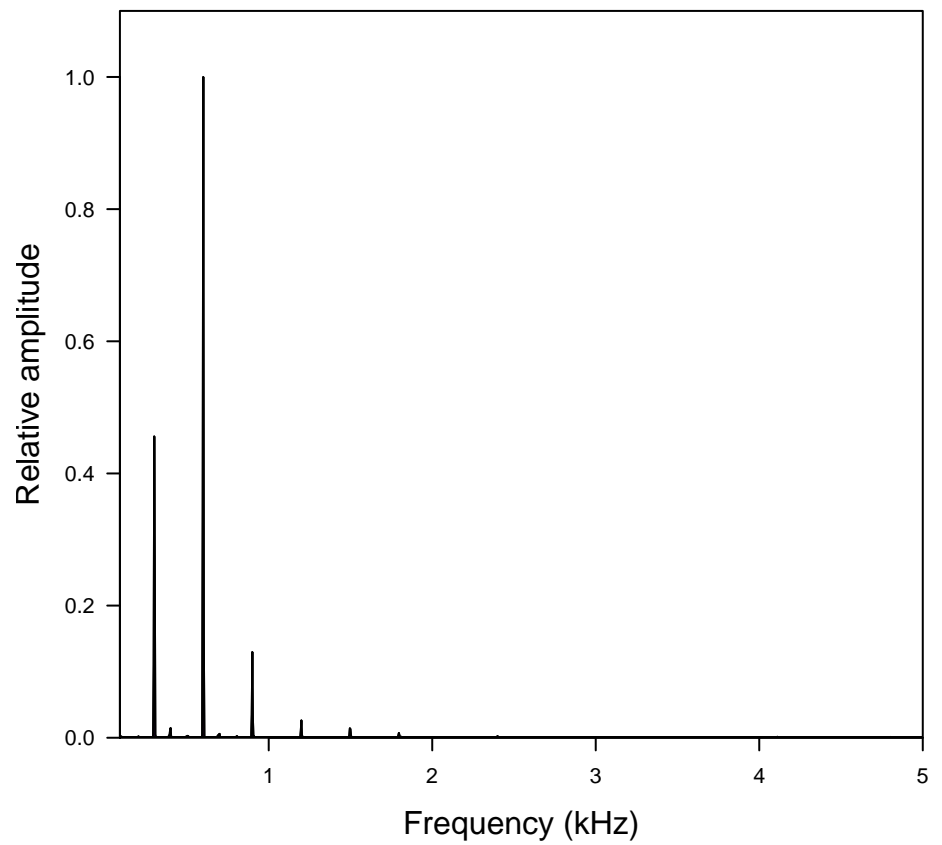

Vel. = 0.057 ; Str. = Receptacle ; Axis = x ; Fl. accession = 10-s-79-2

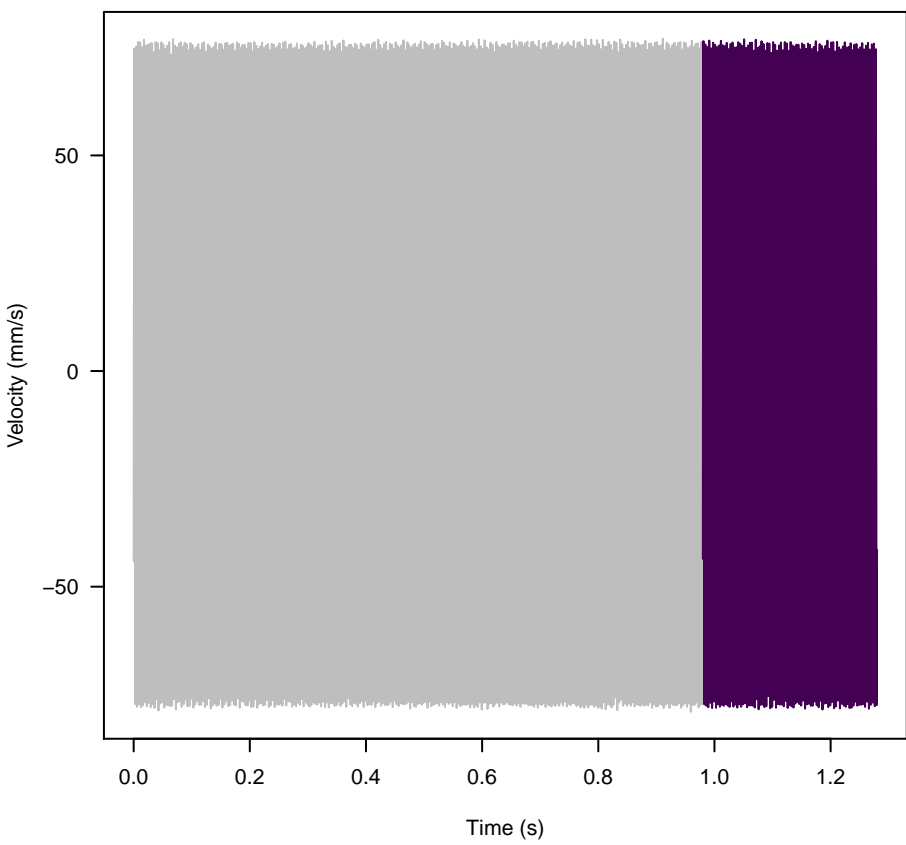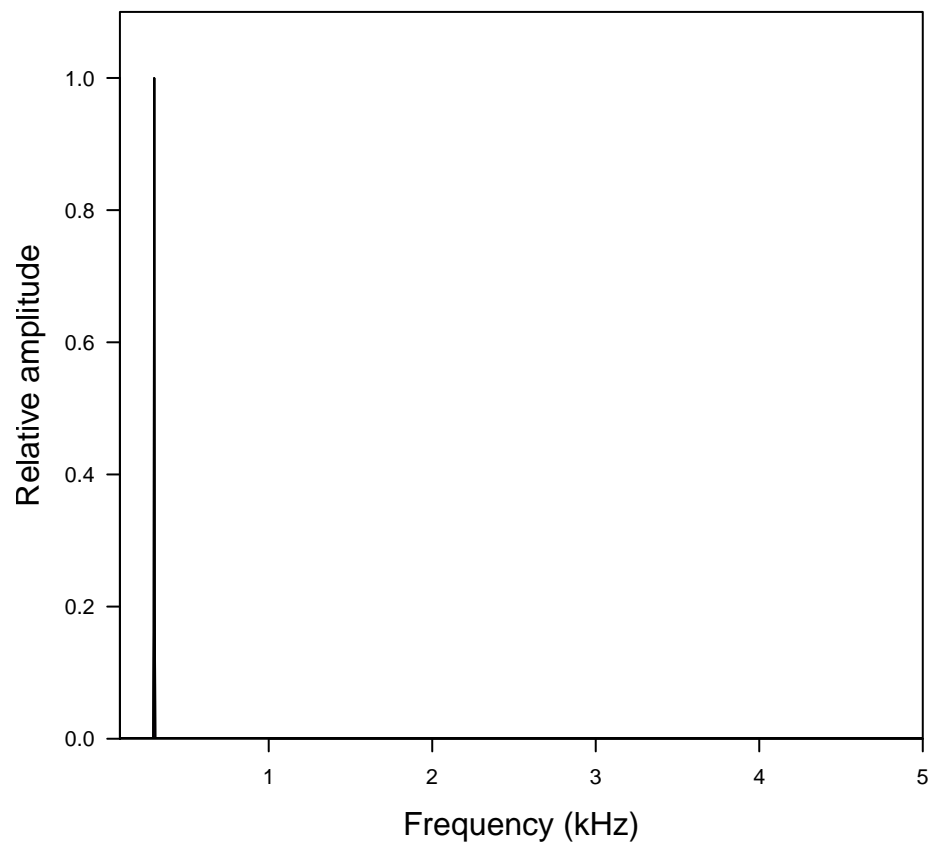

Vel. = 0.028 ; Str. = PA ; Axis = x ; Fl. accession = 10-s-79-2

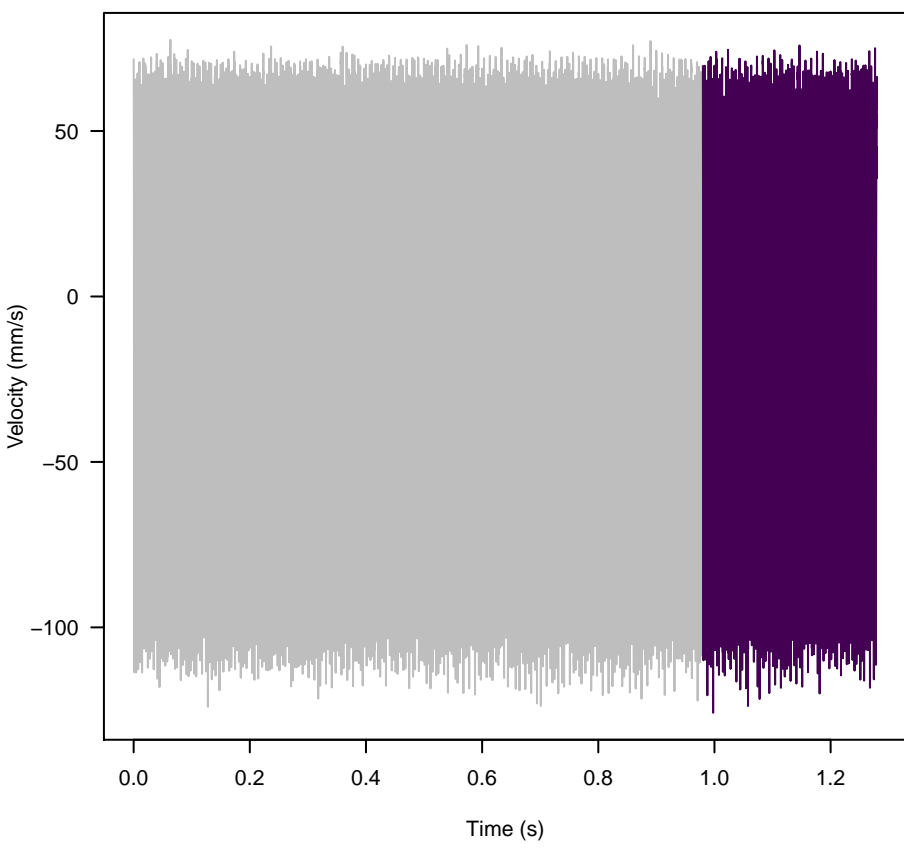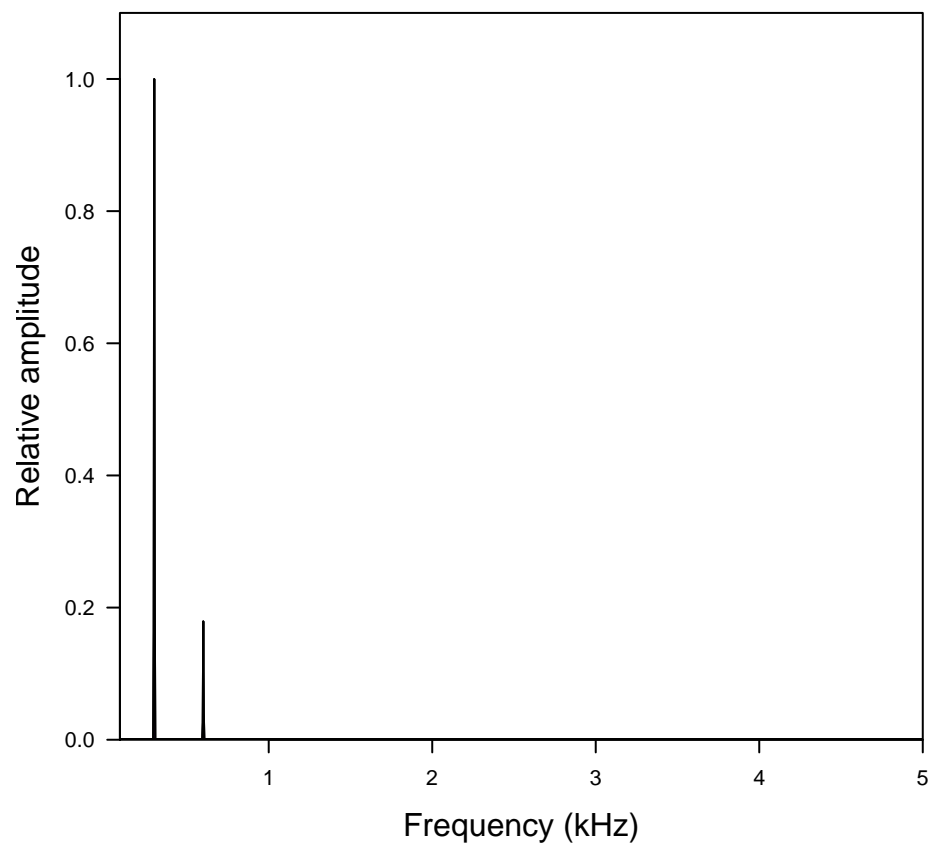

Vel. = 0.028 ; Str. = Receptacle ; Axis = x ; Fl. accession = 10-s-79-2

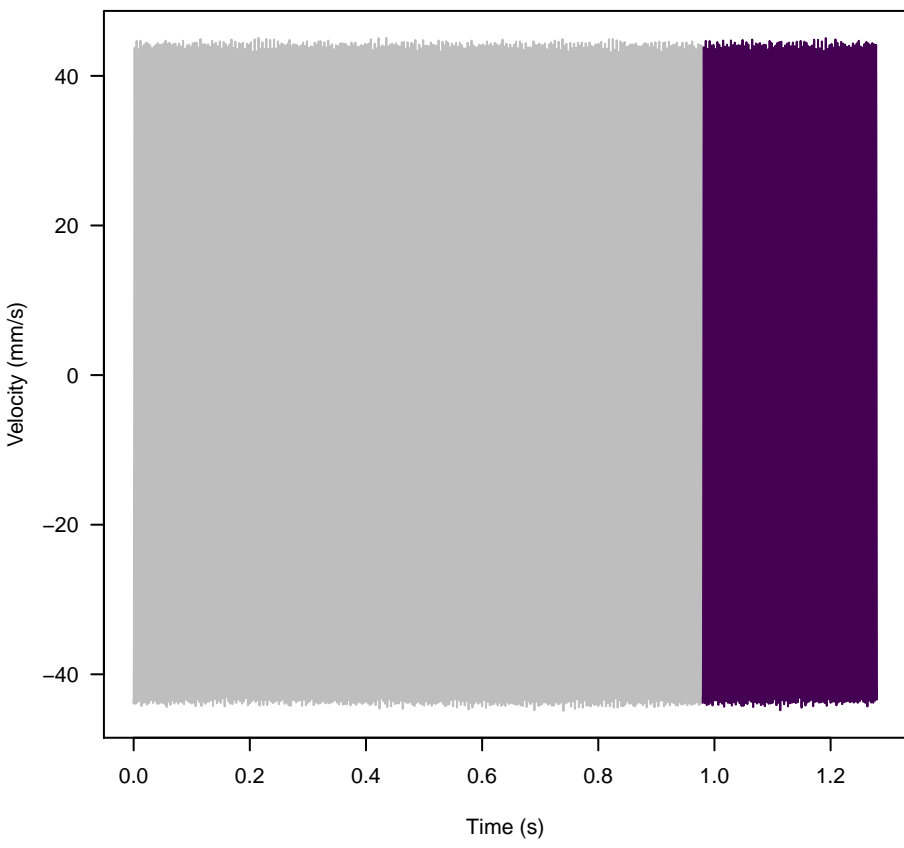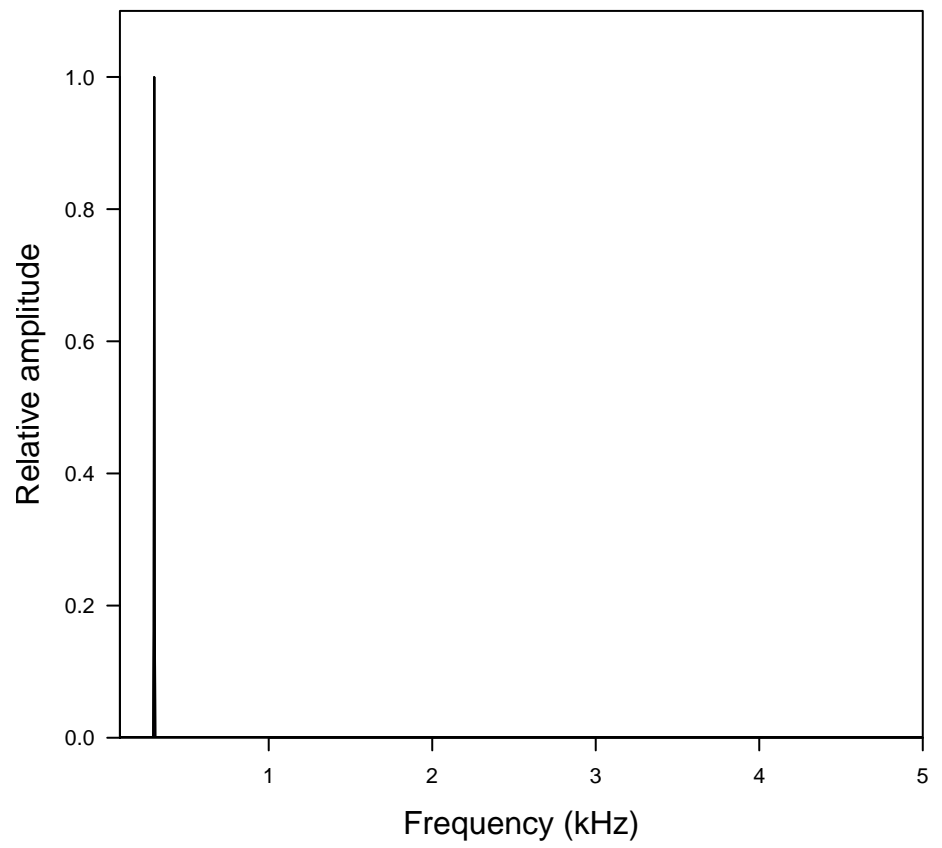

Vel. = 0.028 ; Str. = FA ; Axis = x ; Fl. accession = 10-s-79-2

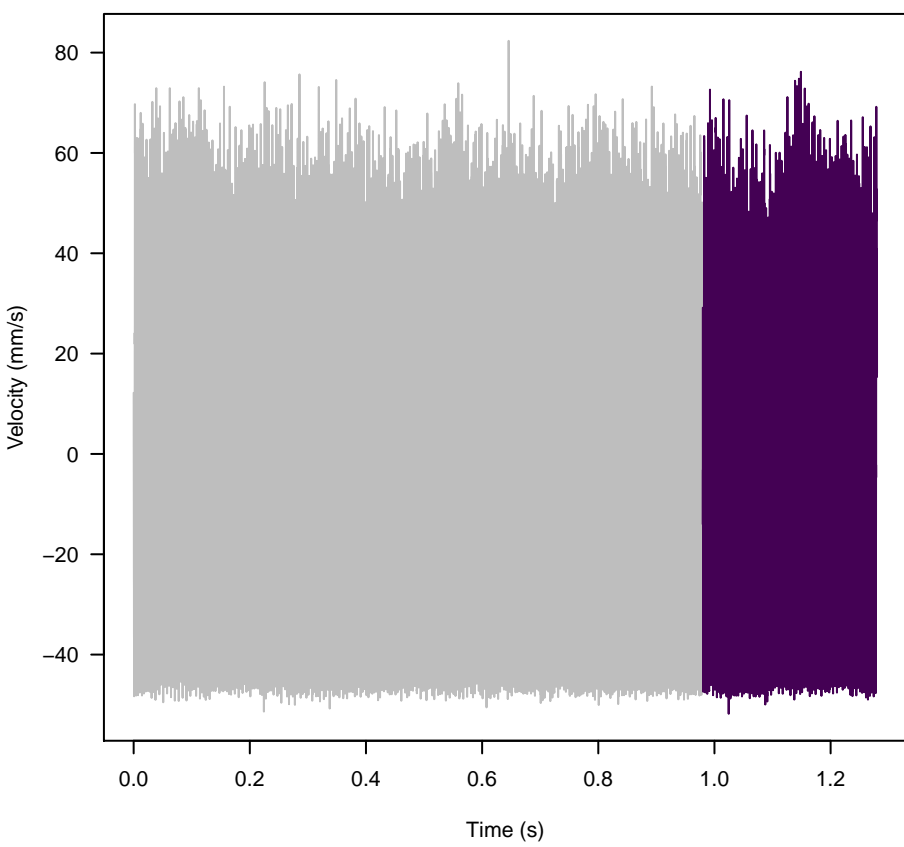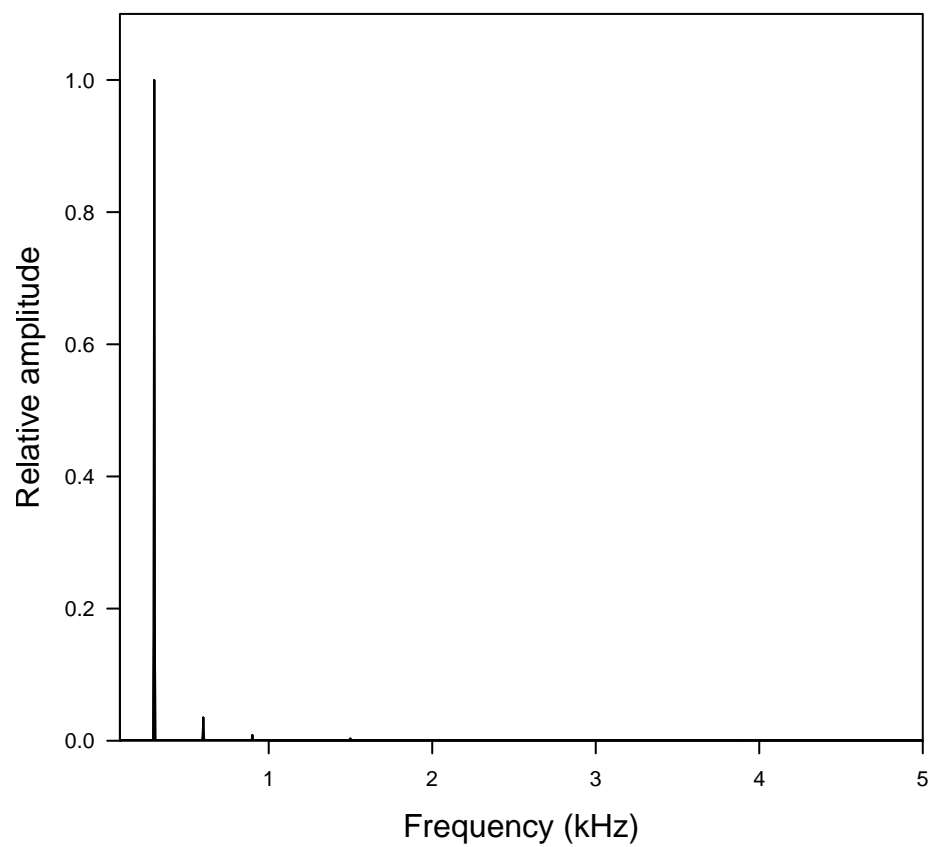

Vel. = 0.028 ; Str. = Receptacle ; Axis = x ; Fl. accession = 10-s-79-2

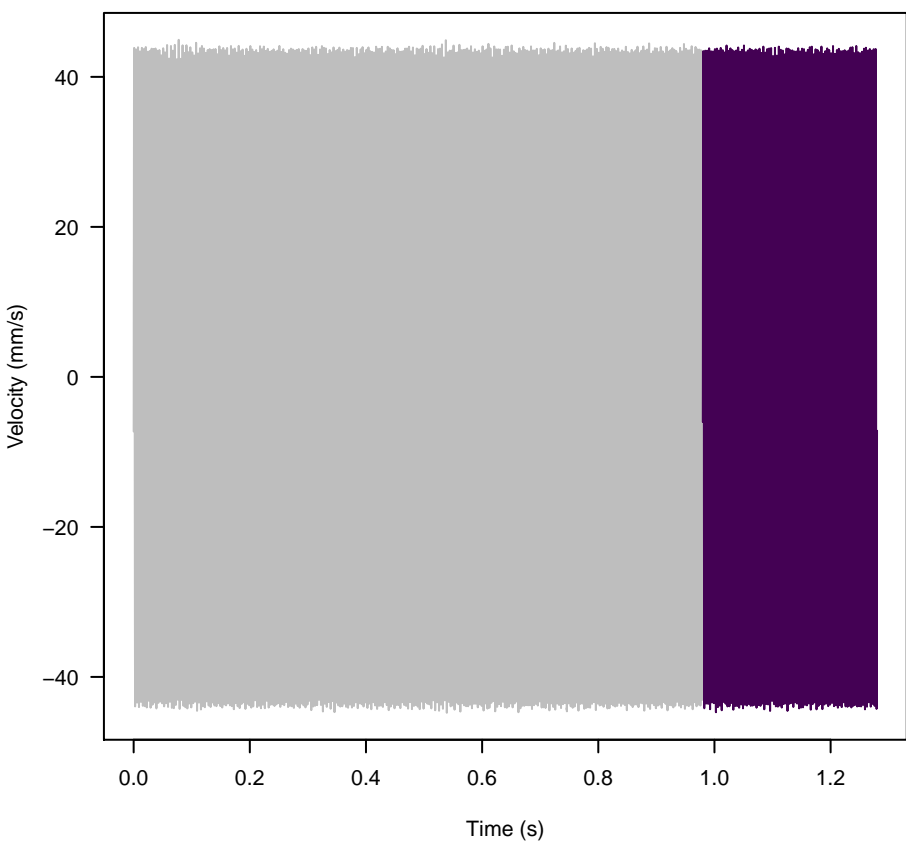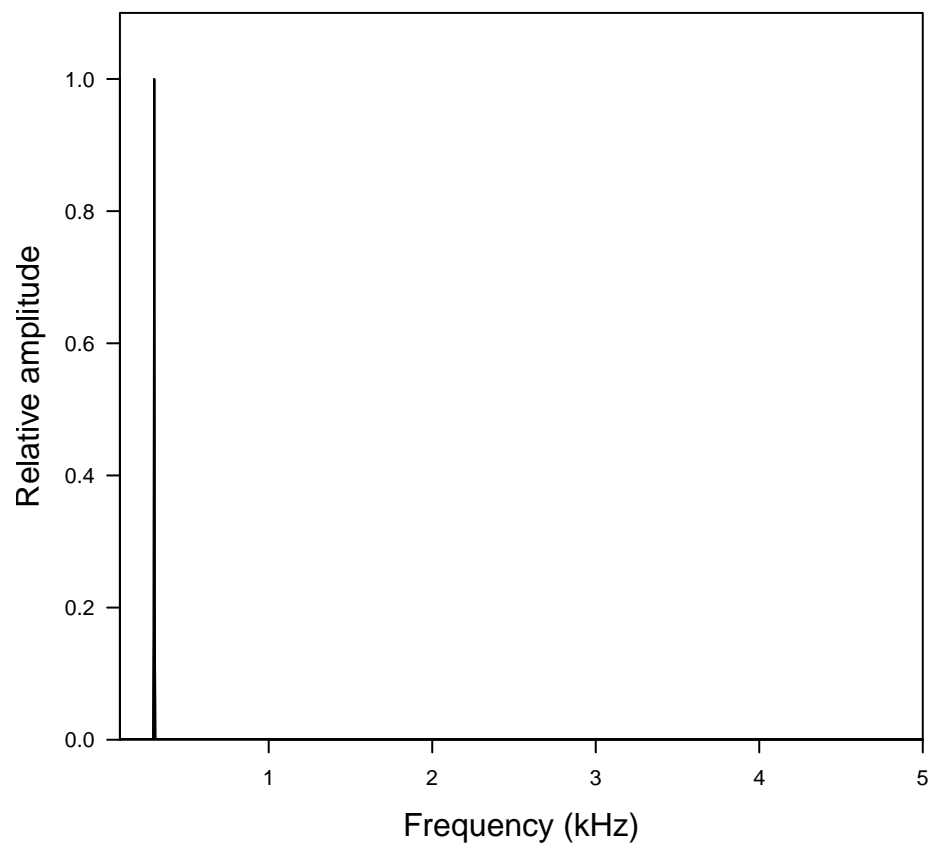

Vel. = 0.028 ; Str. = Corolla ; Axis = x ; Fl. accession = 10-s-79-2

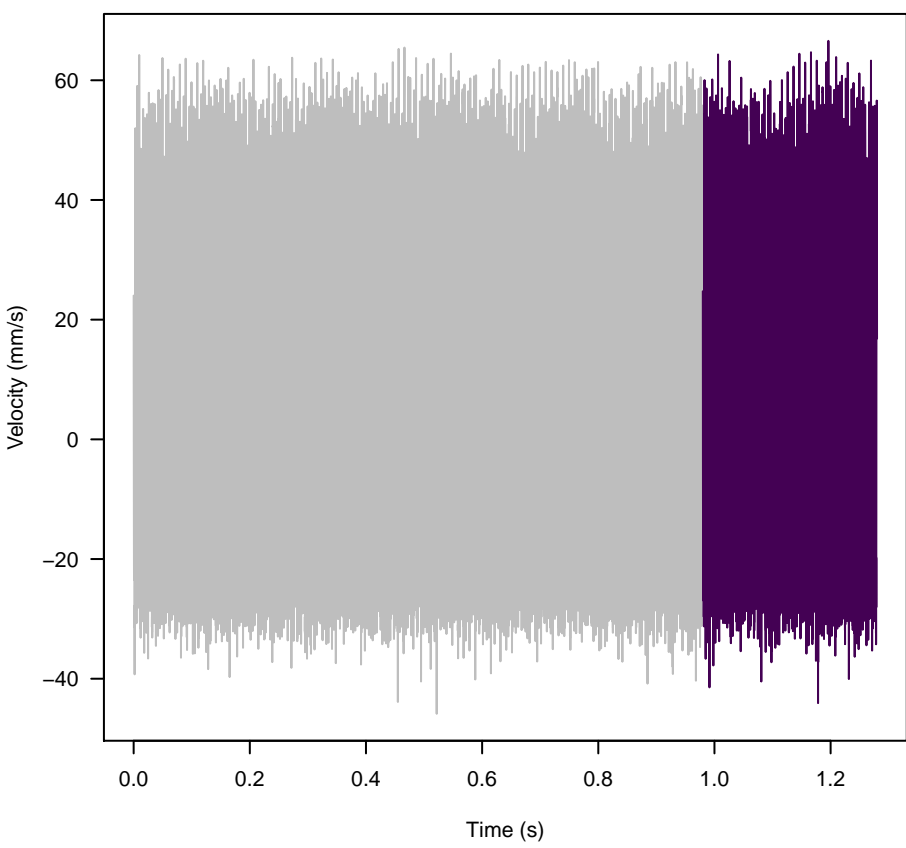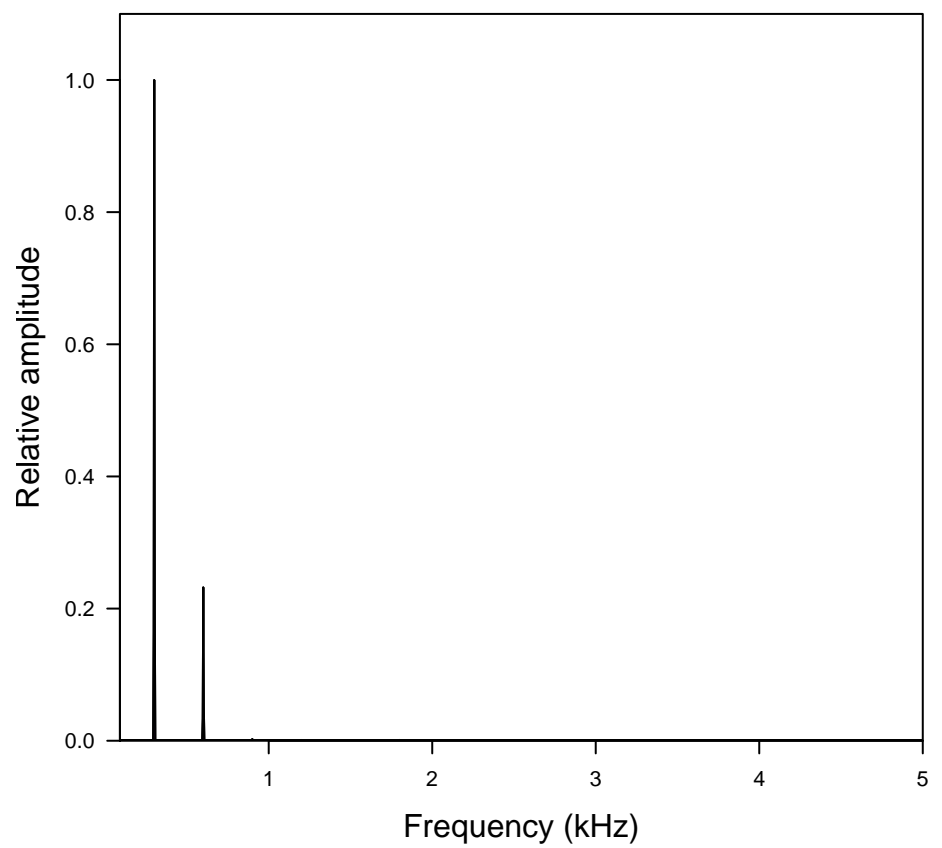

Vel. = 0.028 ; Str. = Receptacle ; Axis = x ; Fl. accession = 10-s-79-2

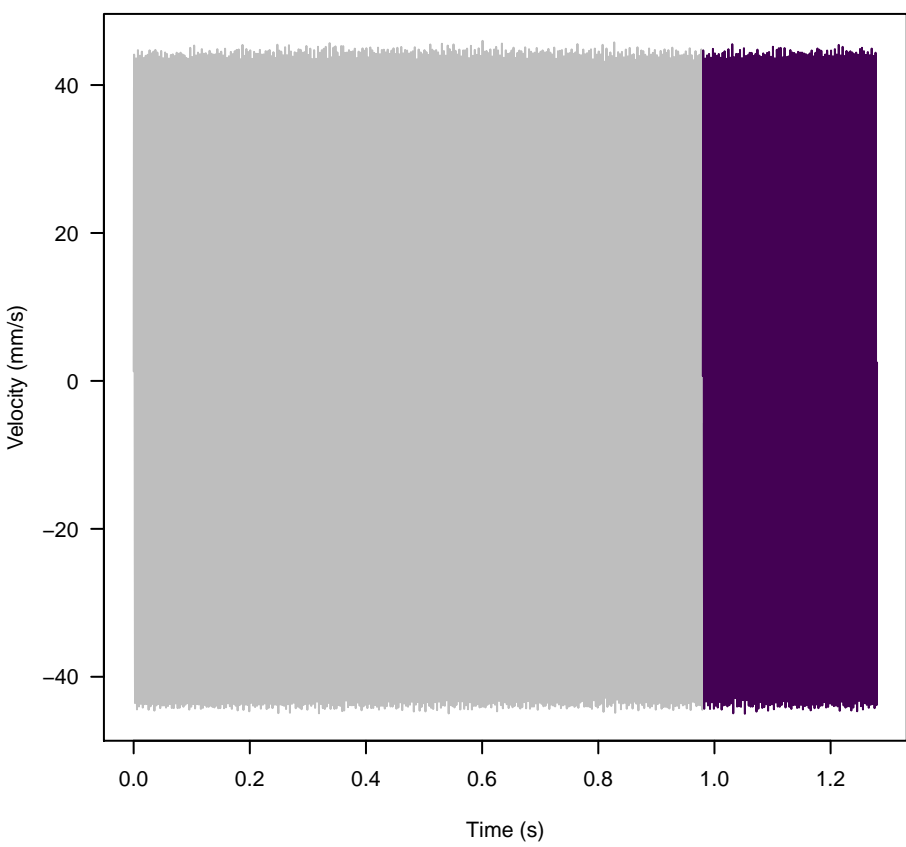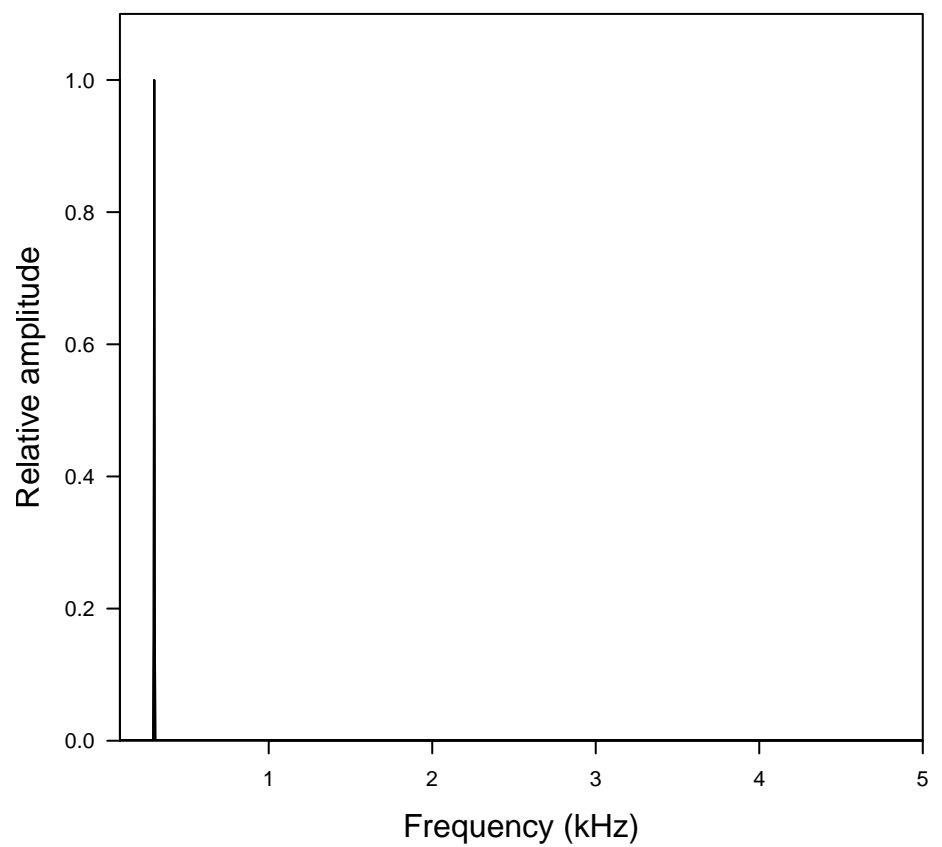

Vel. = 0.014 ; Str. = Corolla ; Axis = x ; Fl. accession = 10-s-79-2

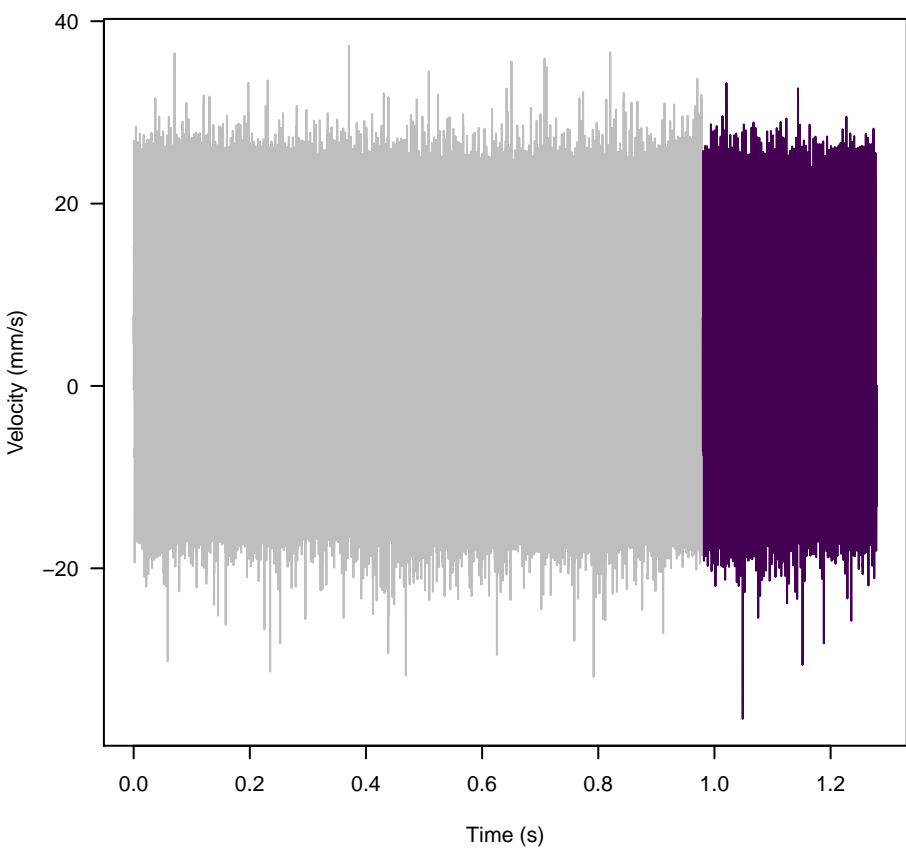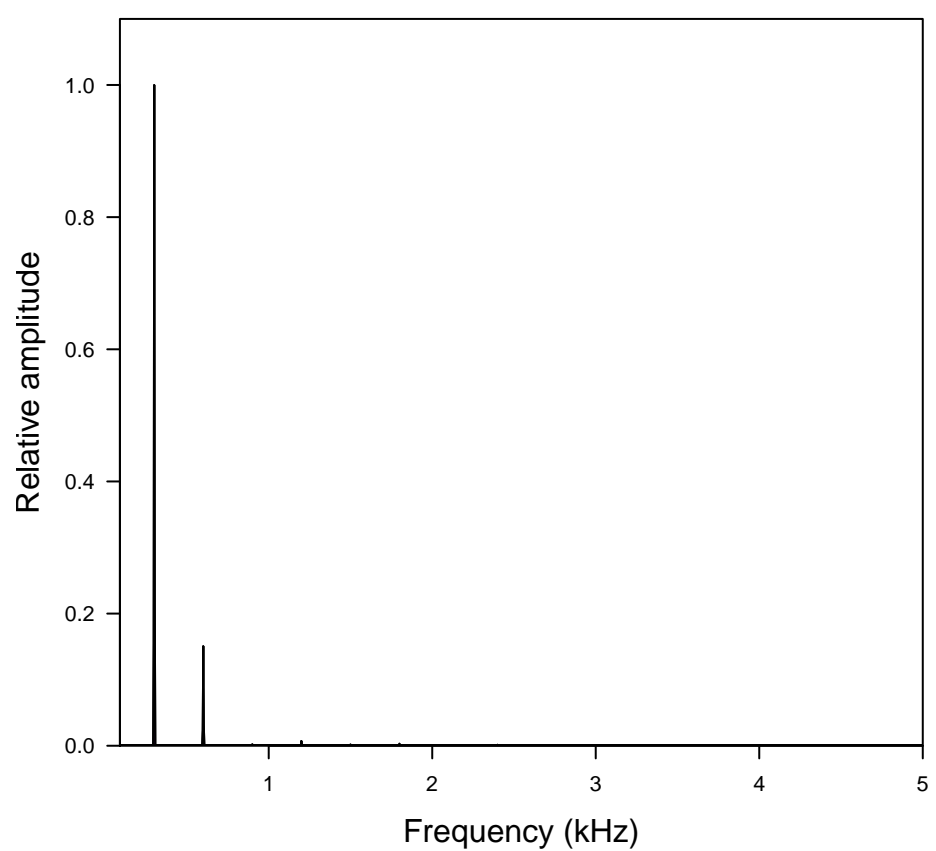

Vel. = 0.014 ; Str. = Receptacle ; Axis = x ; Fl. accession = 10-s-79-2

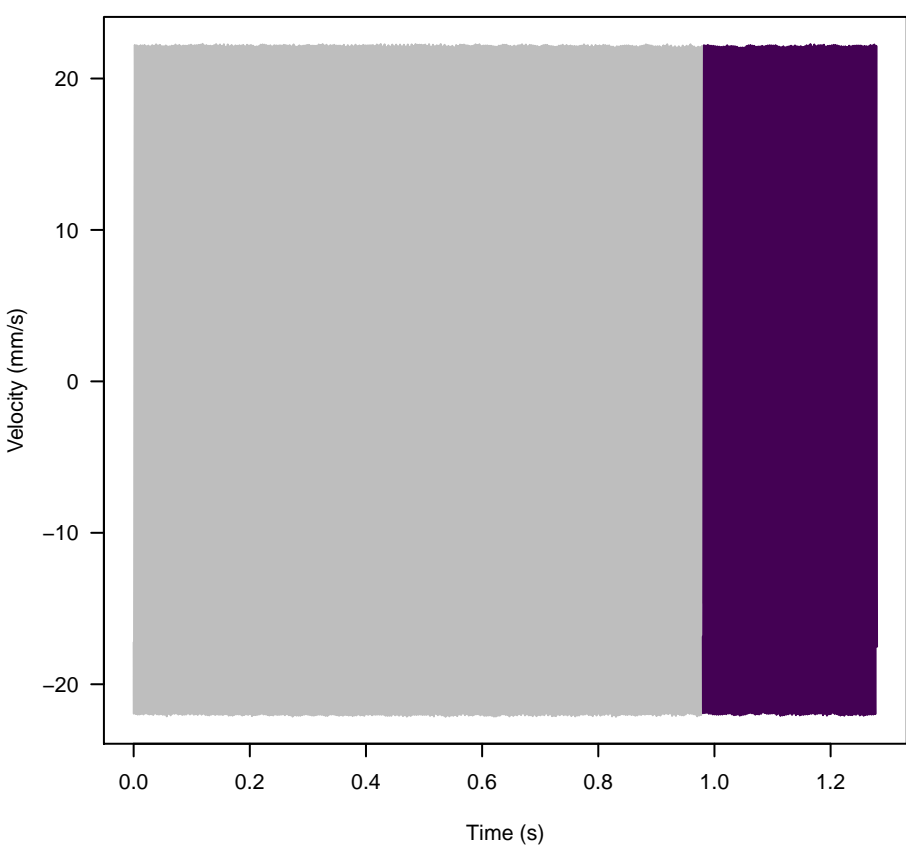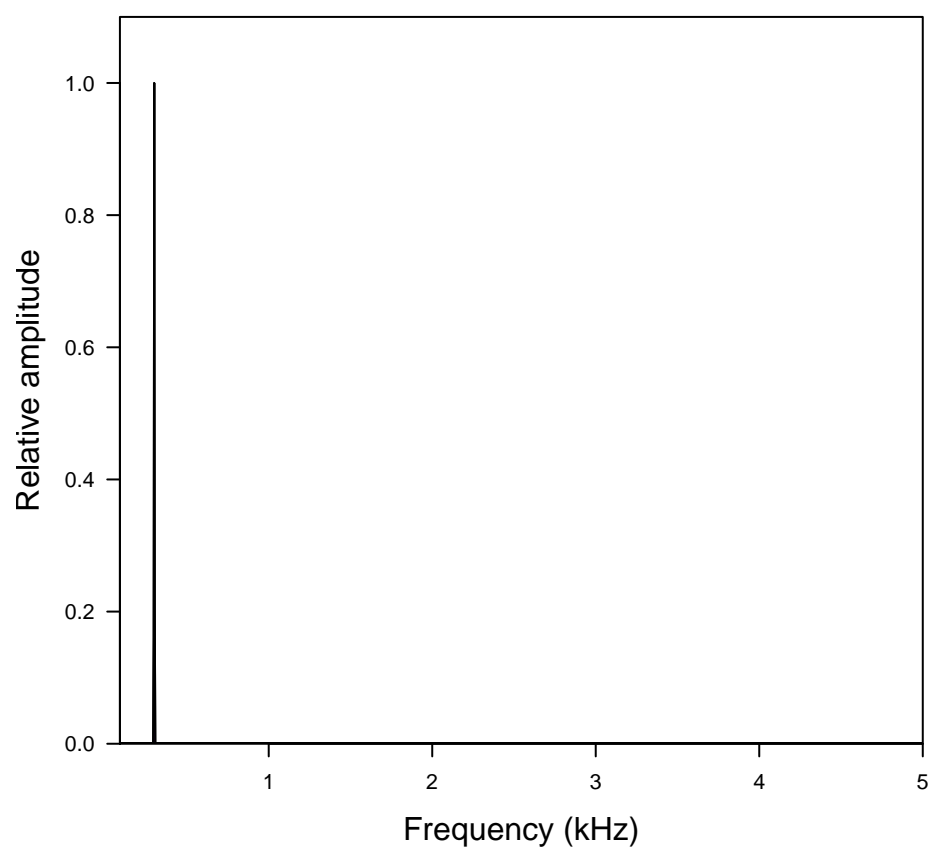

Vel. = 0.014 ; Str. = FA ; Axis = x ; Fl. accession = 10-s-79-2

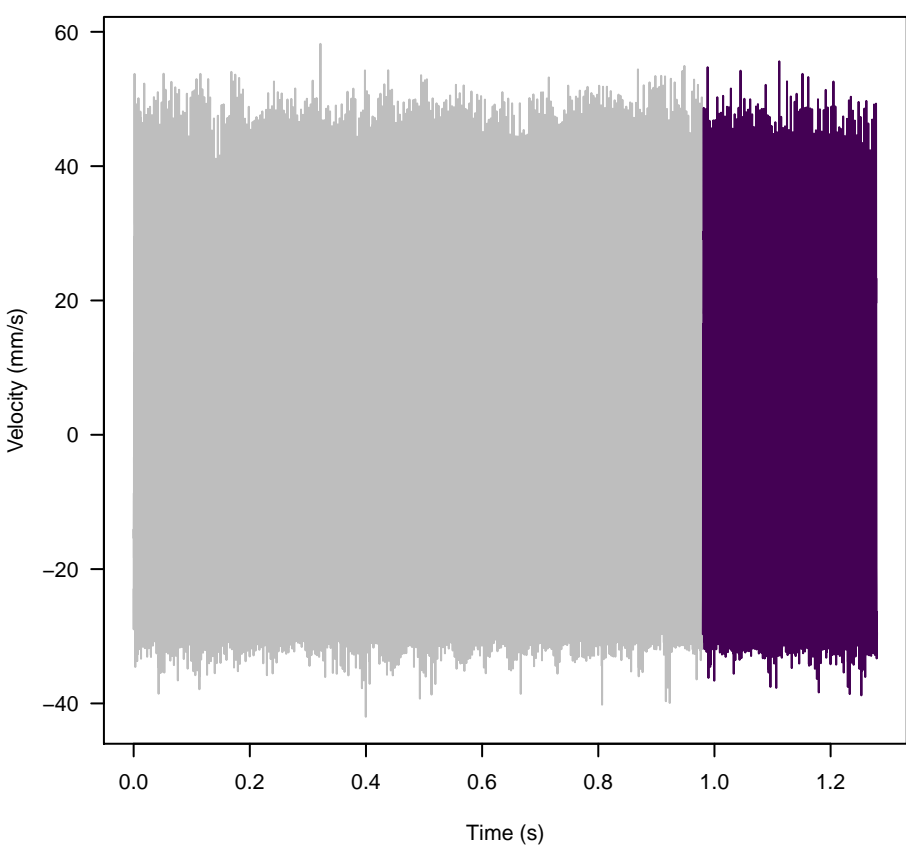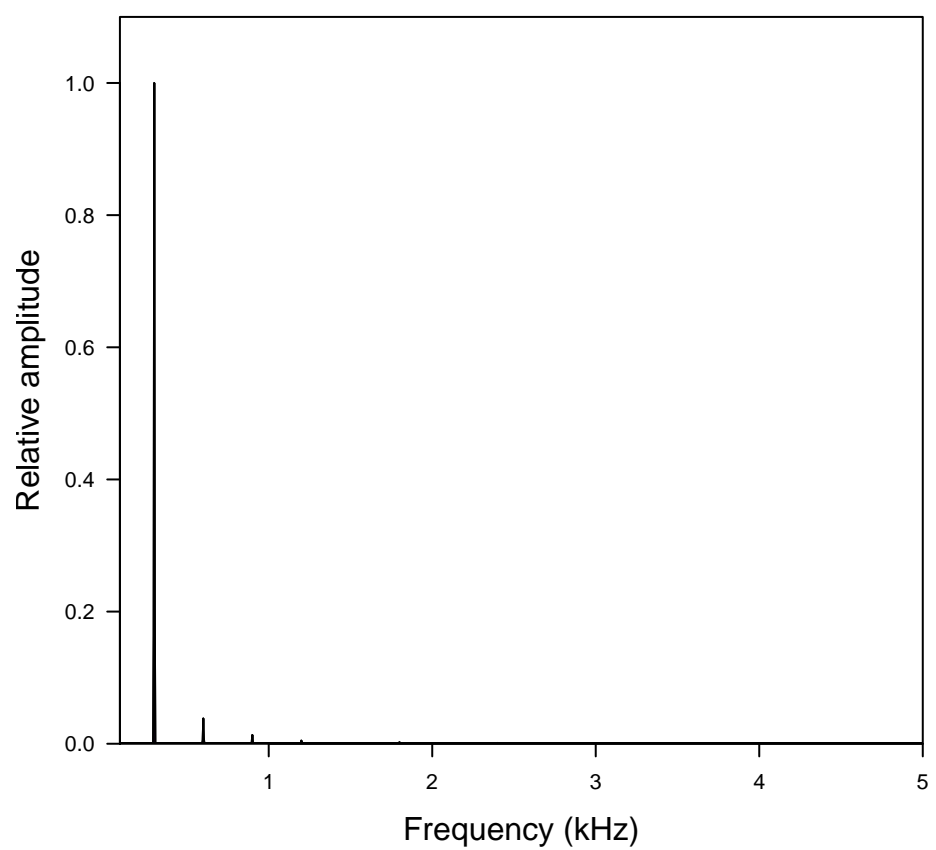

Vel. = 0.014 ; Str. = Receptacle ; Axis = x ; Fl. accession = 10-s-79-2

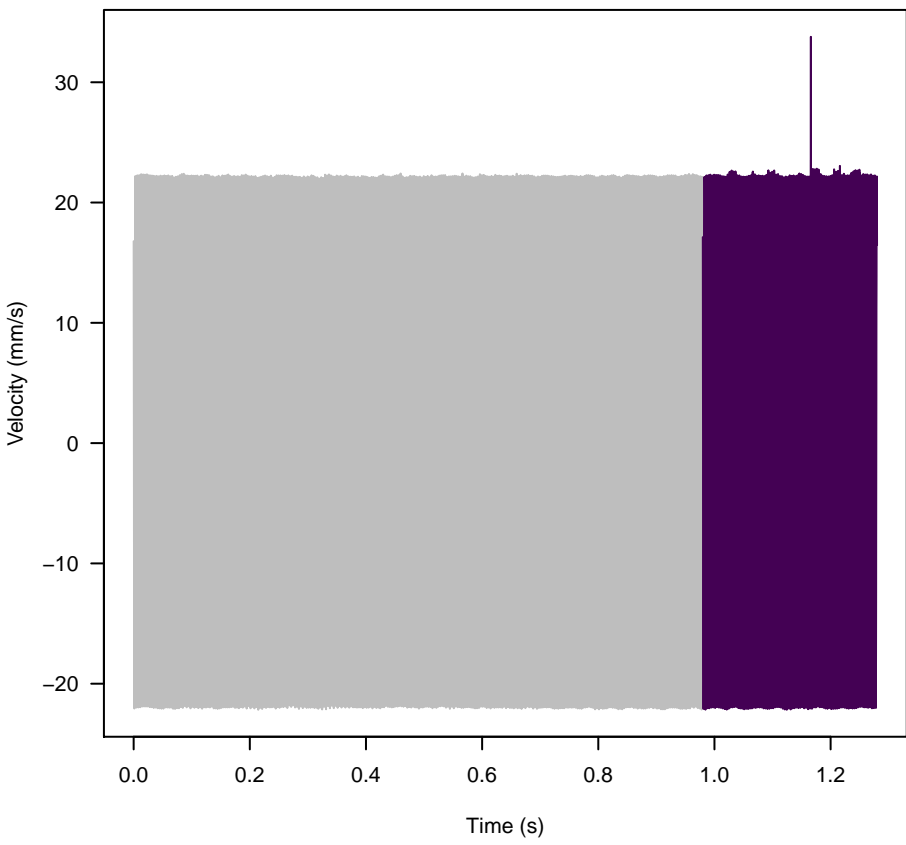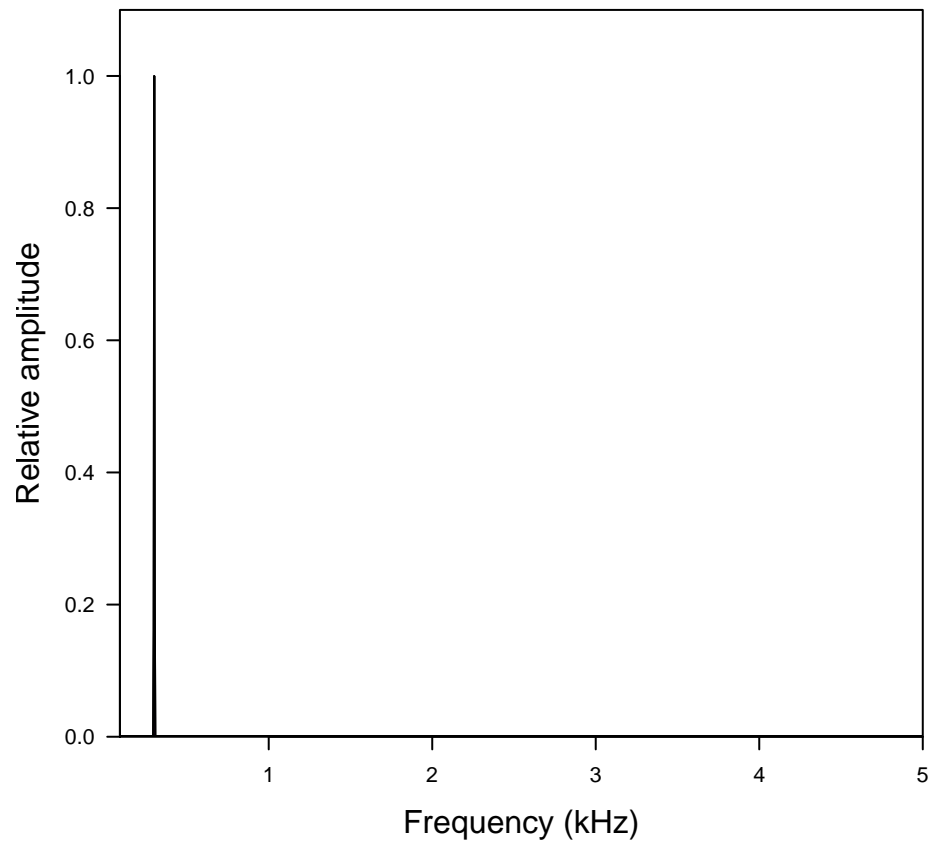

Vel. = 0.014 ; Str. = PA ; Axis = x ; Fl. accession = 10-s-79-2

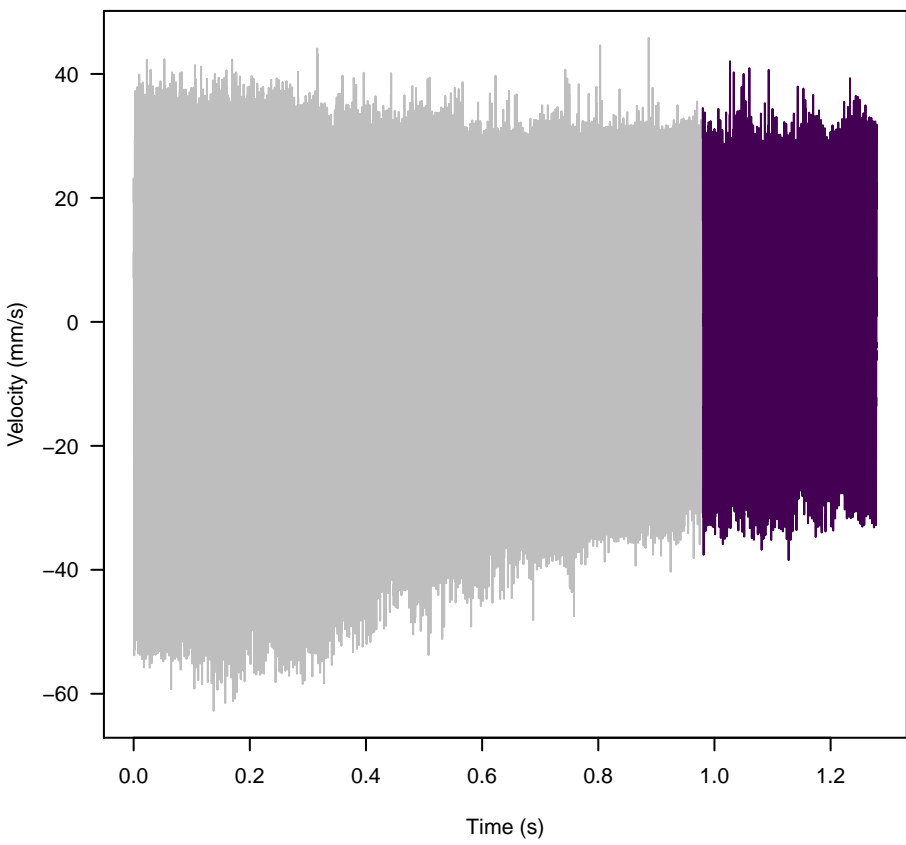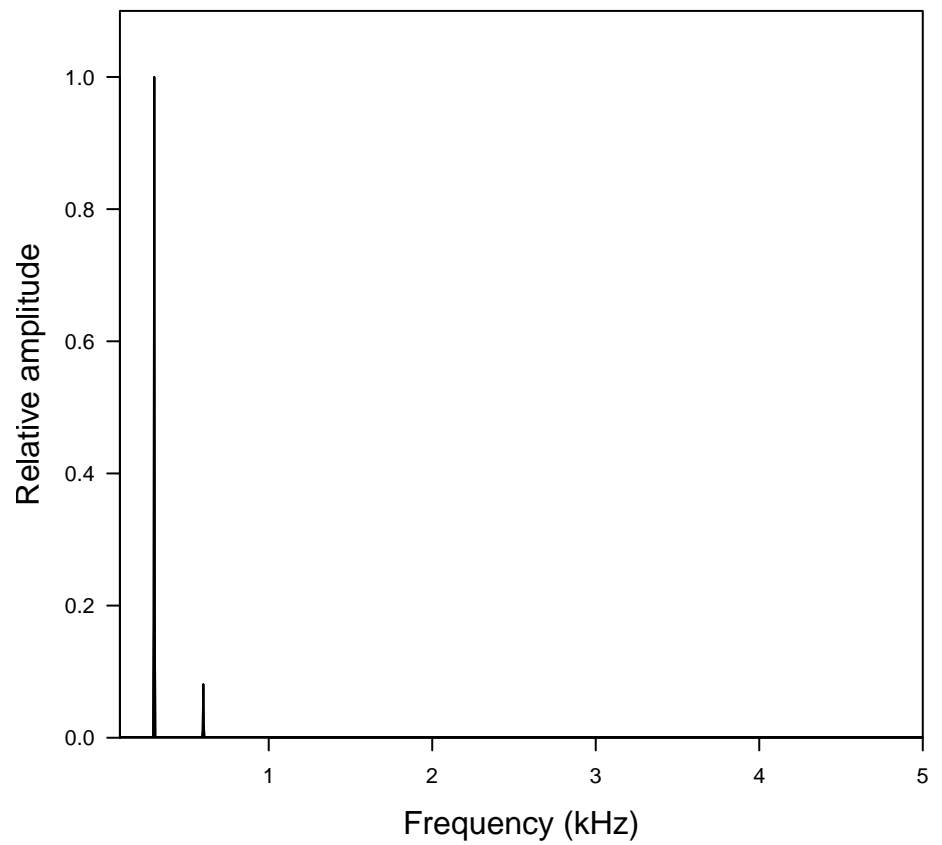

Vel. = 0.014 ; Str. = Receptacle ; Axis = x ; Fl. accession = 10-s-79-2

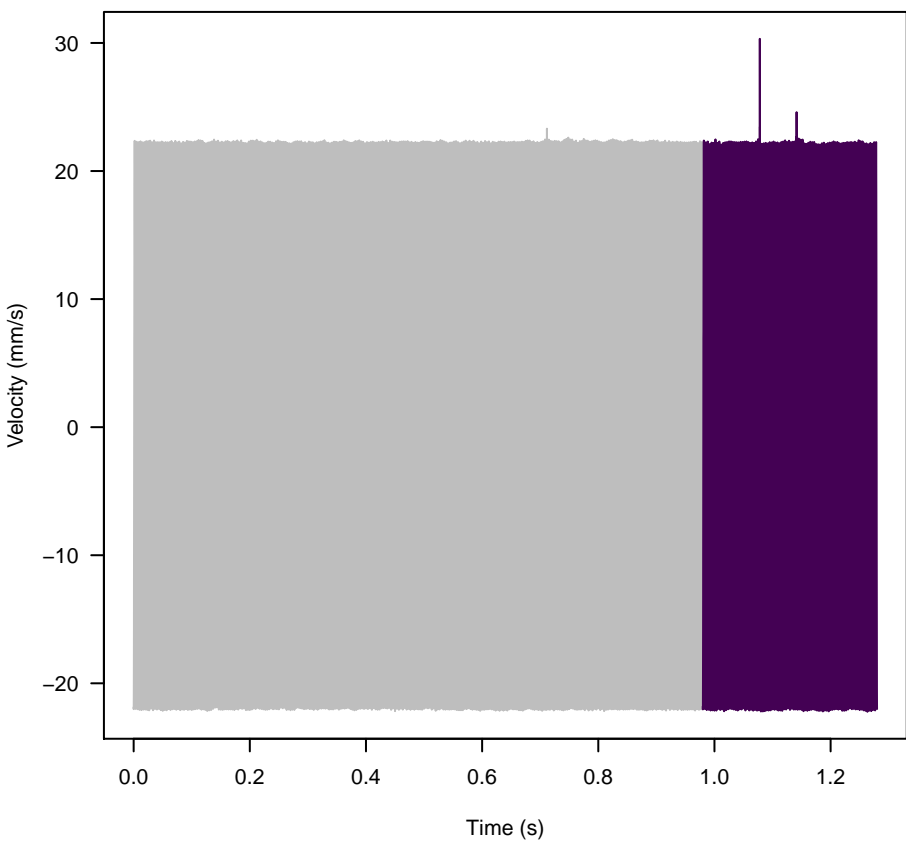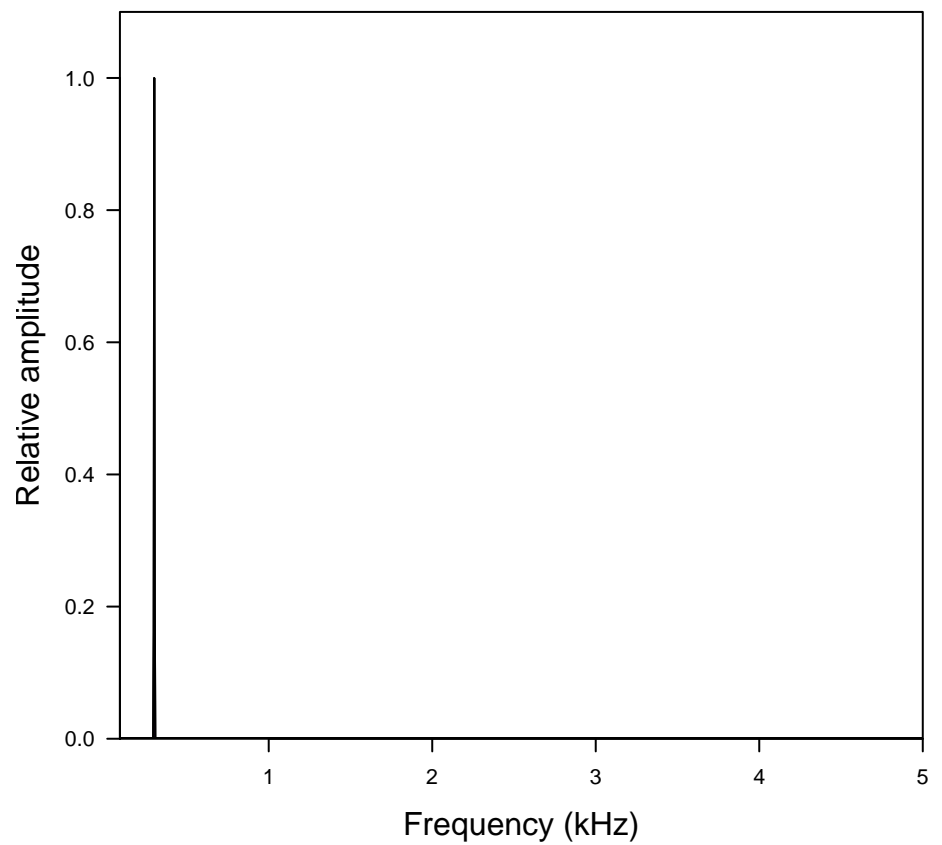



Vel. = 0.014 ; Str. = Corolla ; Axis = x ; Fl. accession = 10-s-77-12

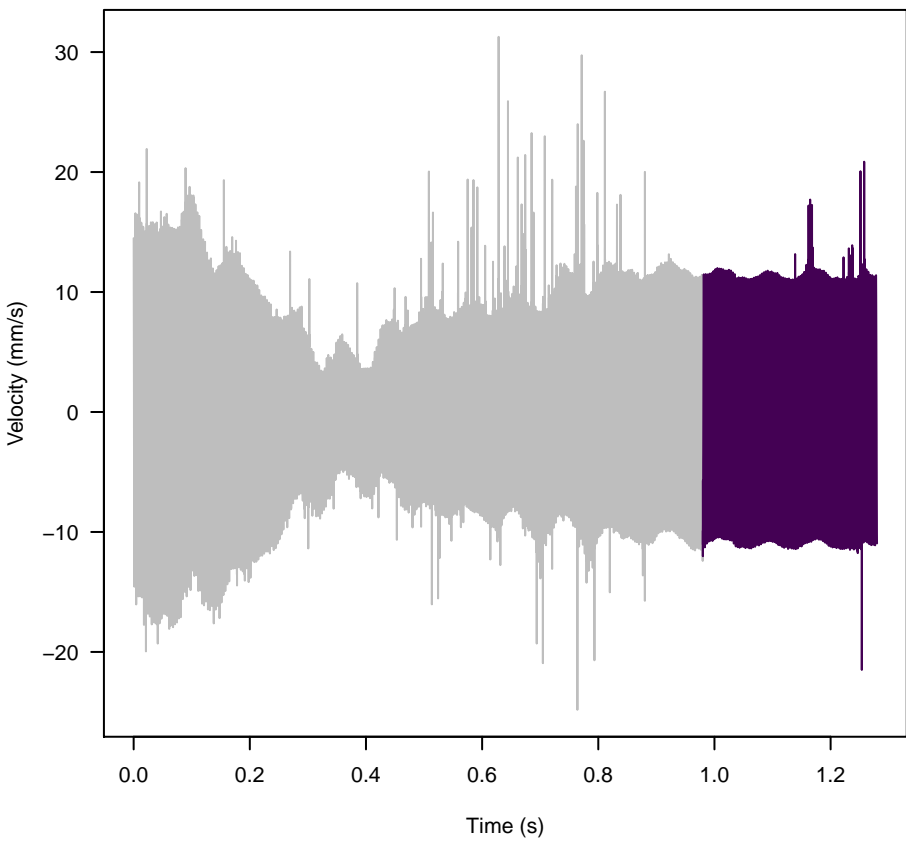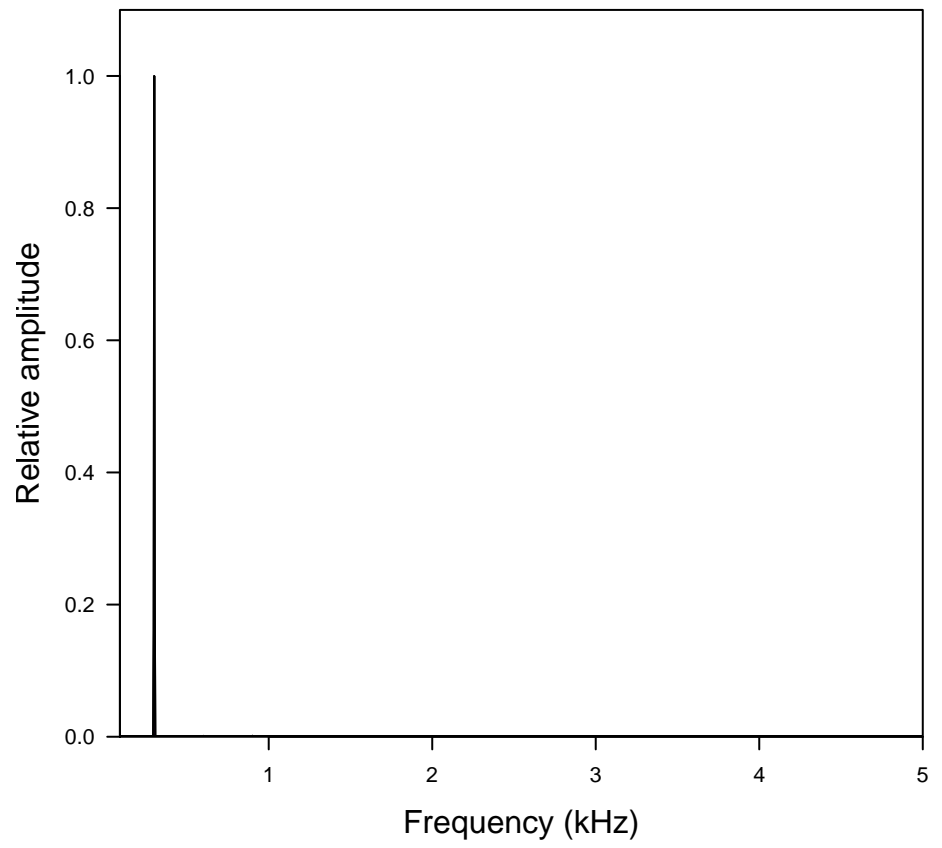

Vel. = 0.014 ; Str. = Receptacle ; Axis = x ; Fl. accession = 10-s-77-12

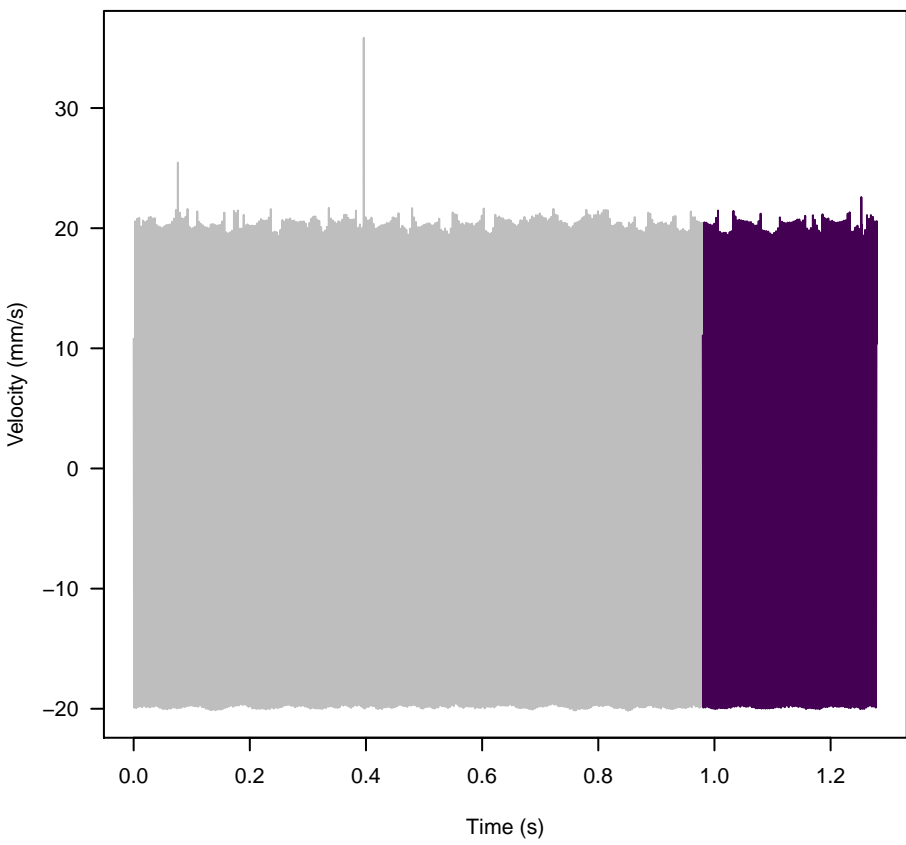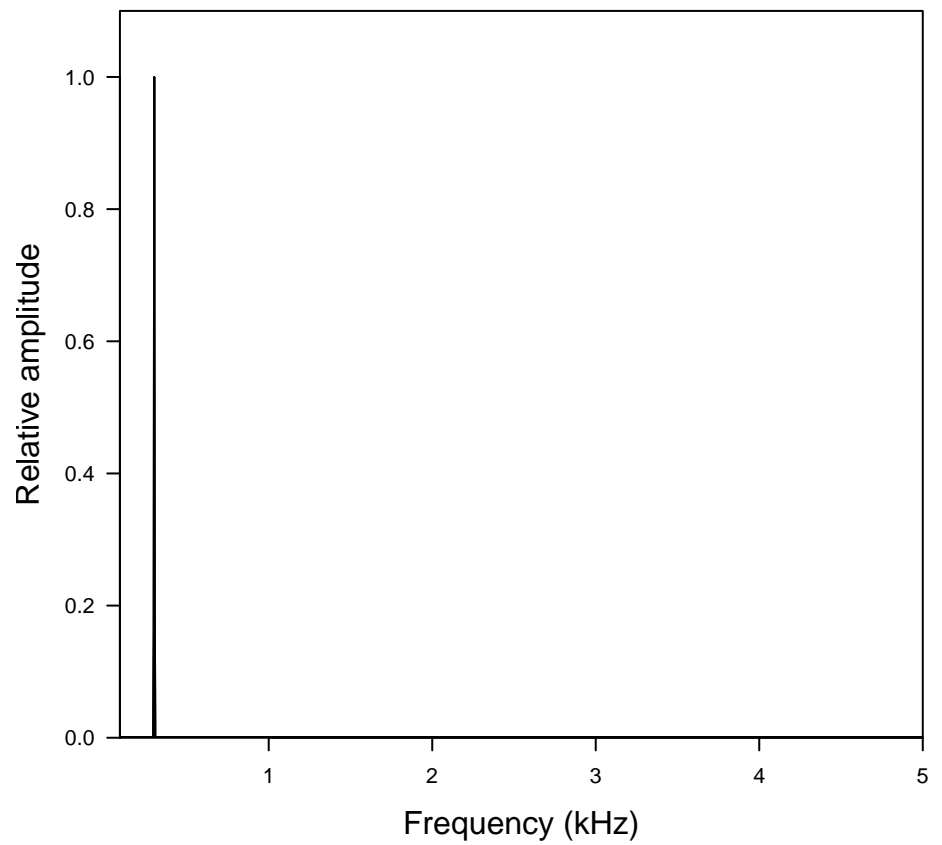

Vel. = 0.014 ; Str. = FA ; Axis = x ; Fl. accession = 10-s-77-12

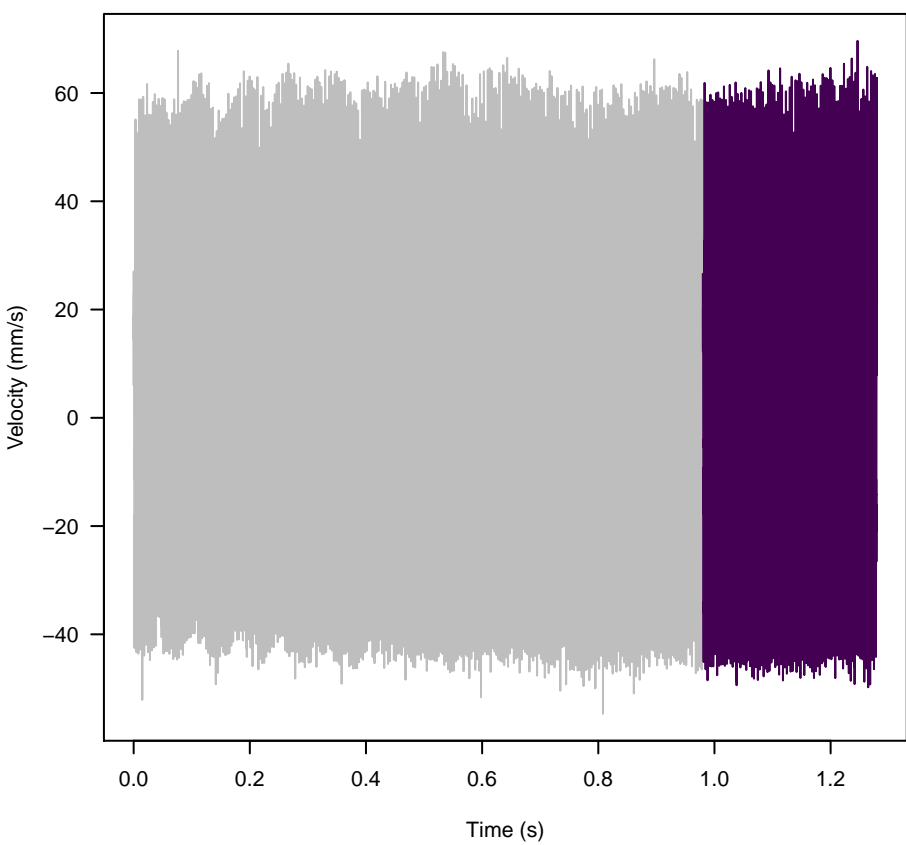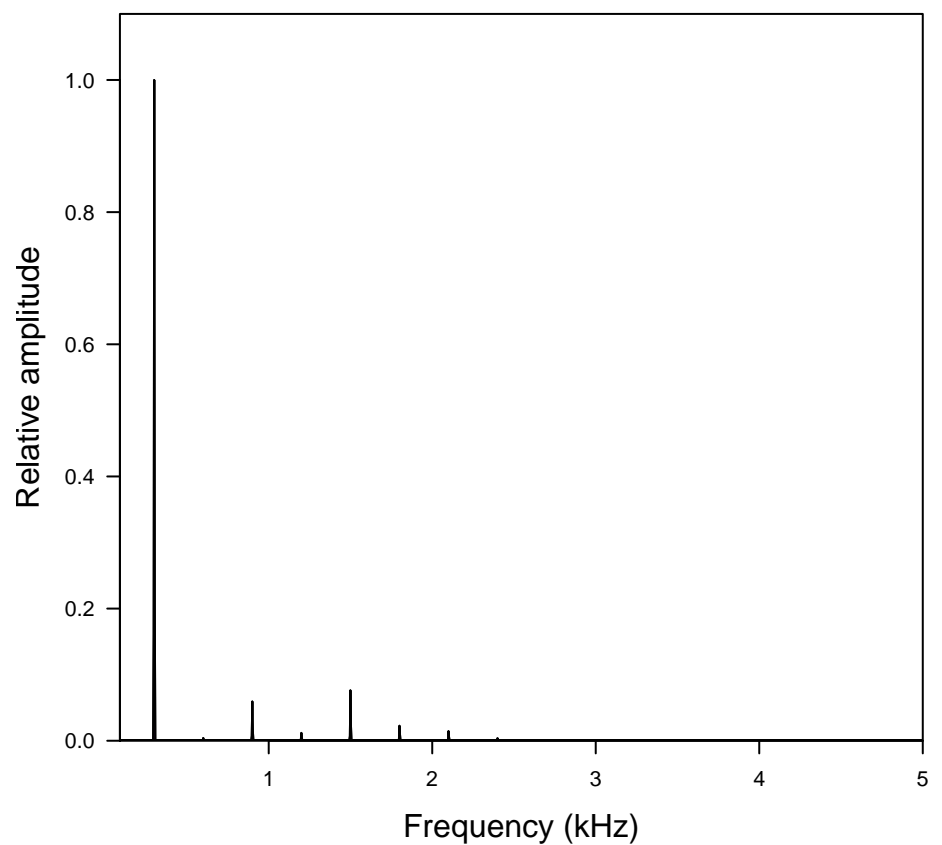

Vel. = 0.014 ; Str. = Receptacle ; Axis = x ; Fl. accession = 10-s-77-12

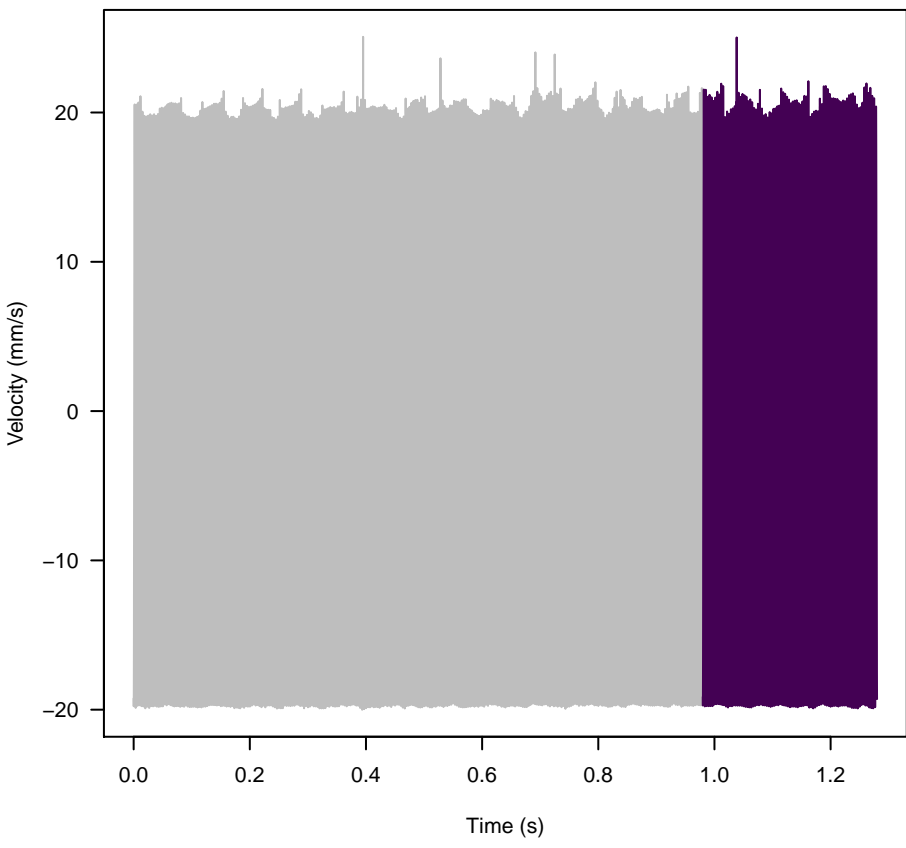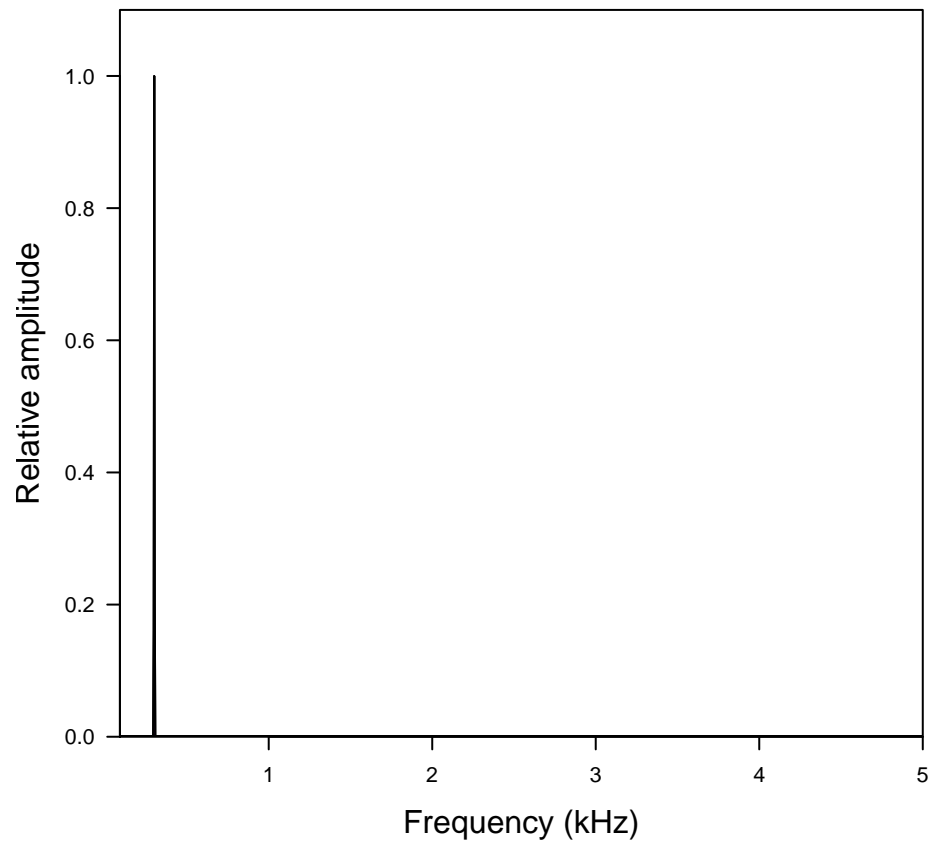

Vel. = 0.014 ; Str. = PA ; Axis = x ; Fl. accession = 10-s-77-12

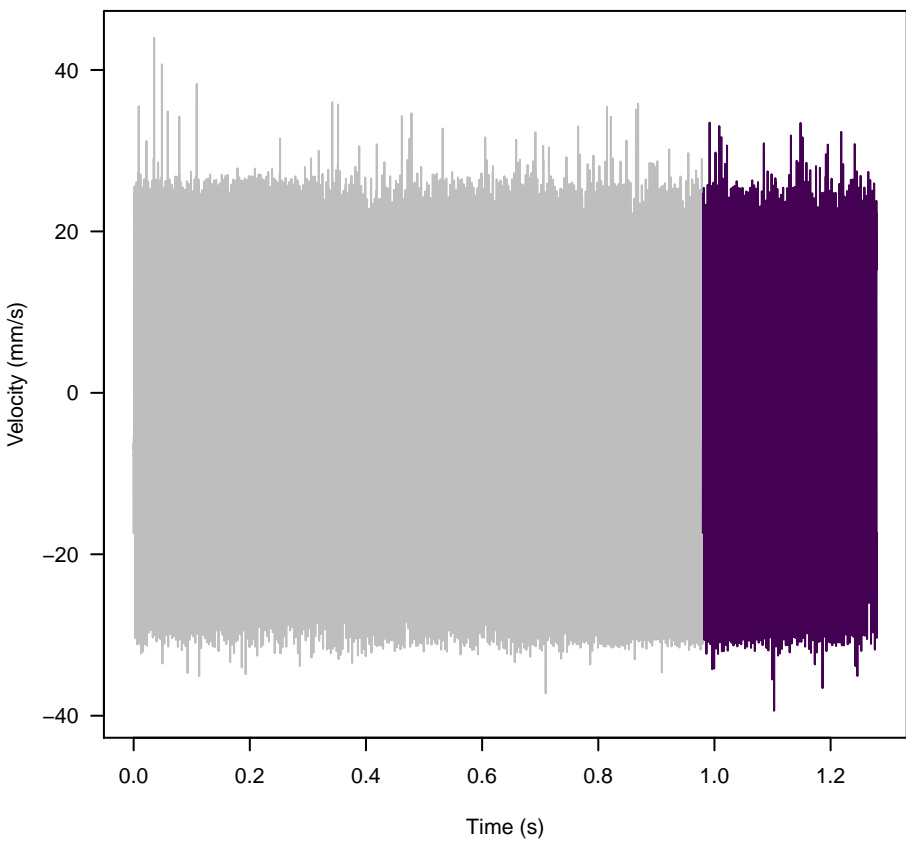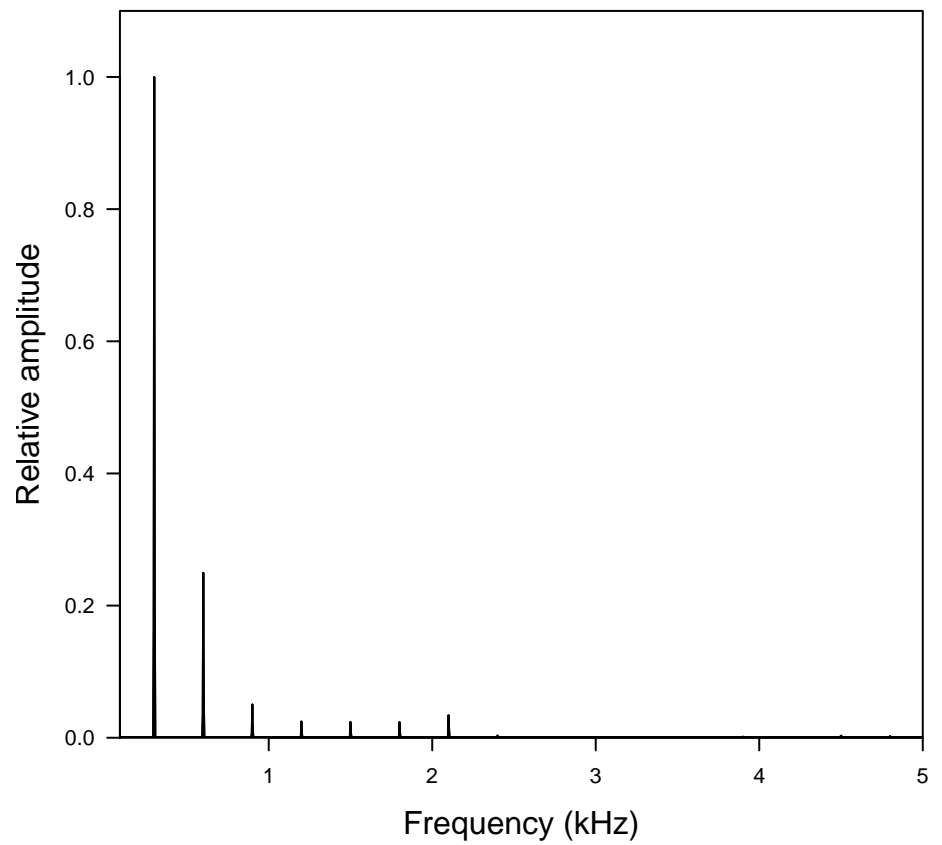

Vel. = 0.014 ; Str. = Receptacle ; Axis = x ; Fl. accession = 10-s-77-12

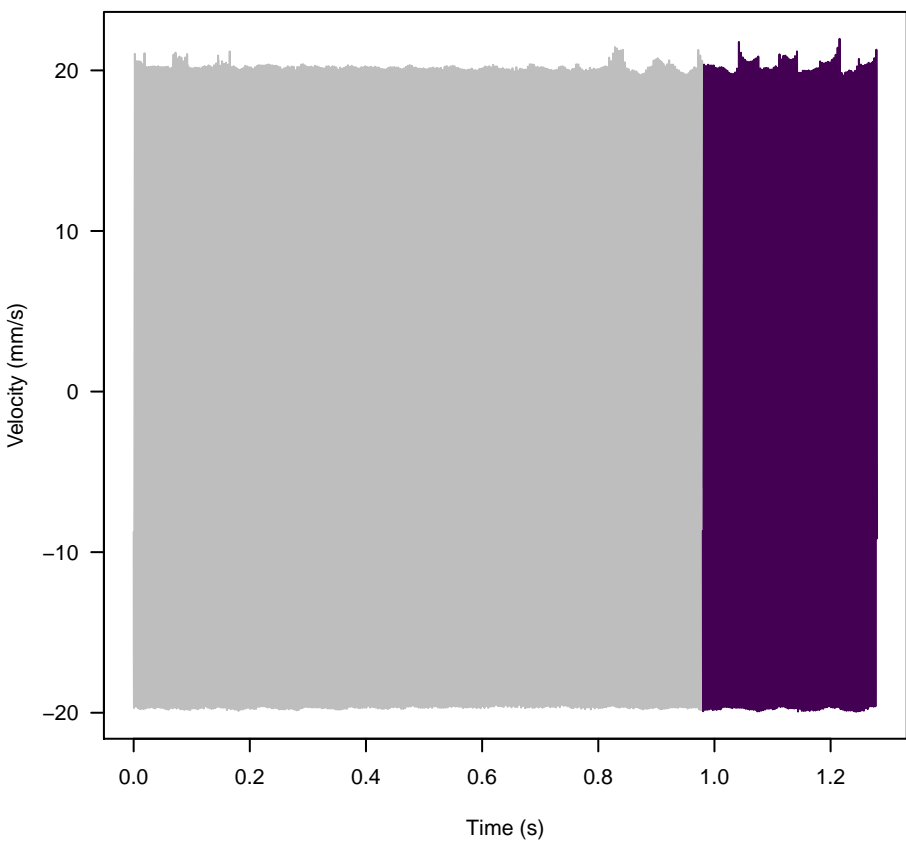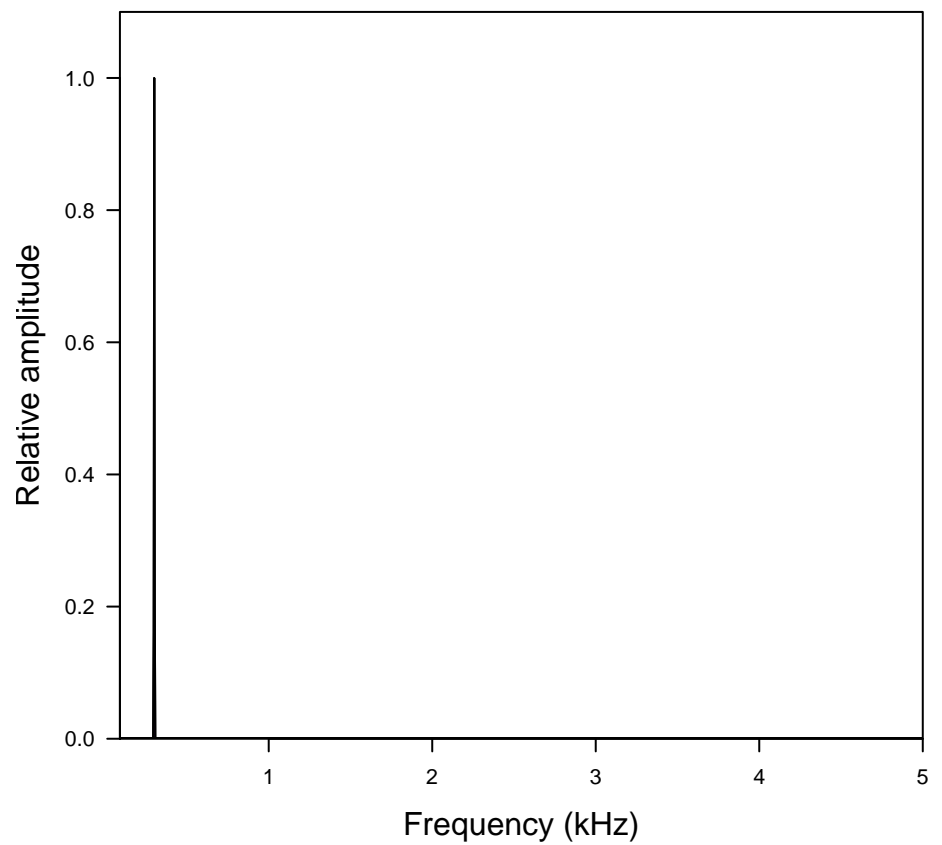

Vel. = 0.028 ; Str. = PA ; Axis = x ; Fl. accession = 10-s-77-12

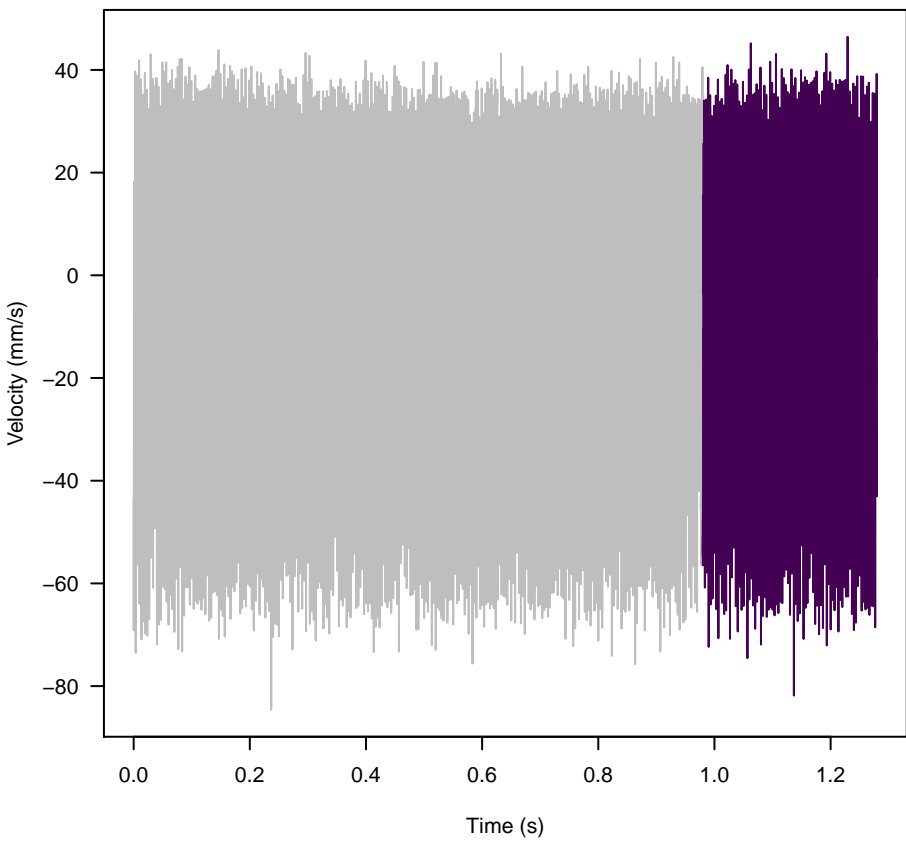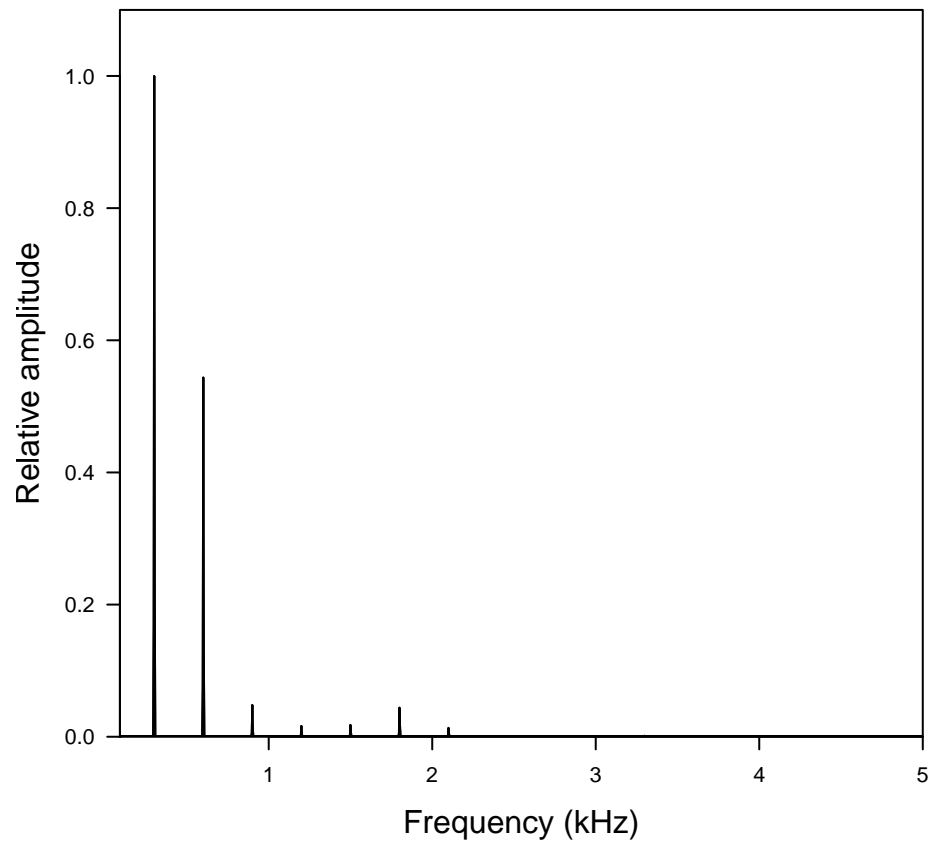

Vel. = 0.028 ; Str. = Receptacle ; Axis = x ; Fl. accession = 10-s-77-12

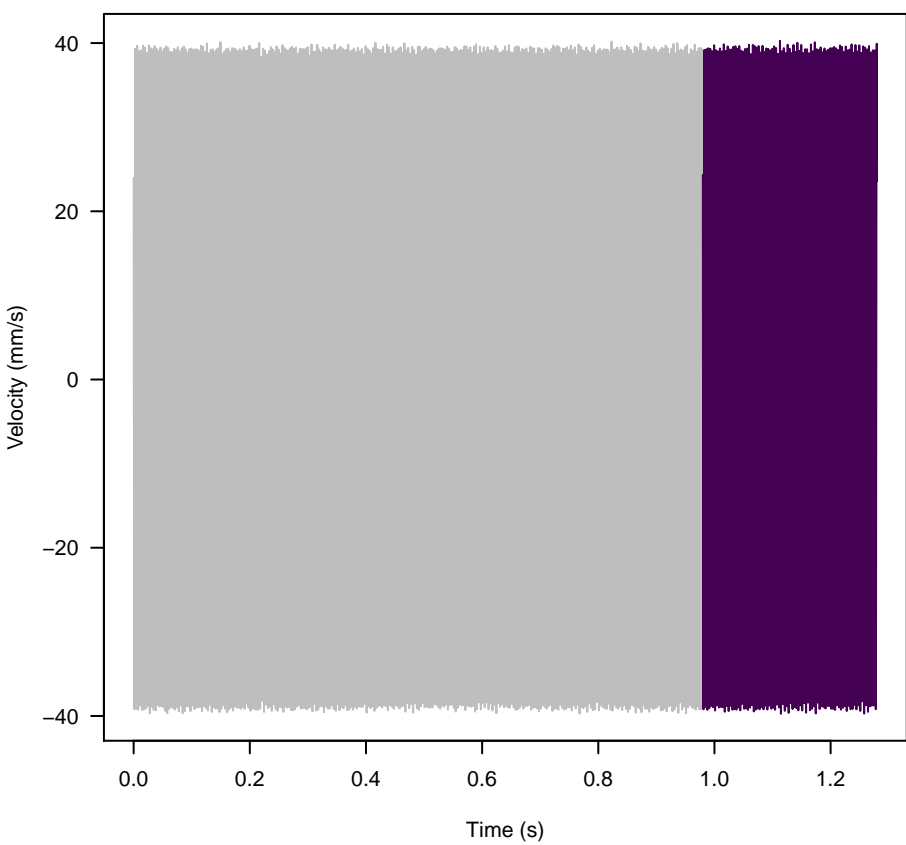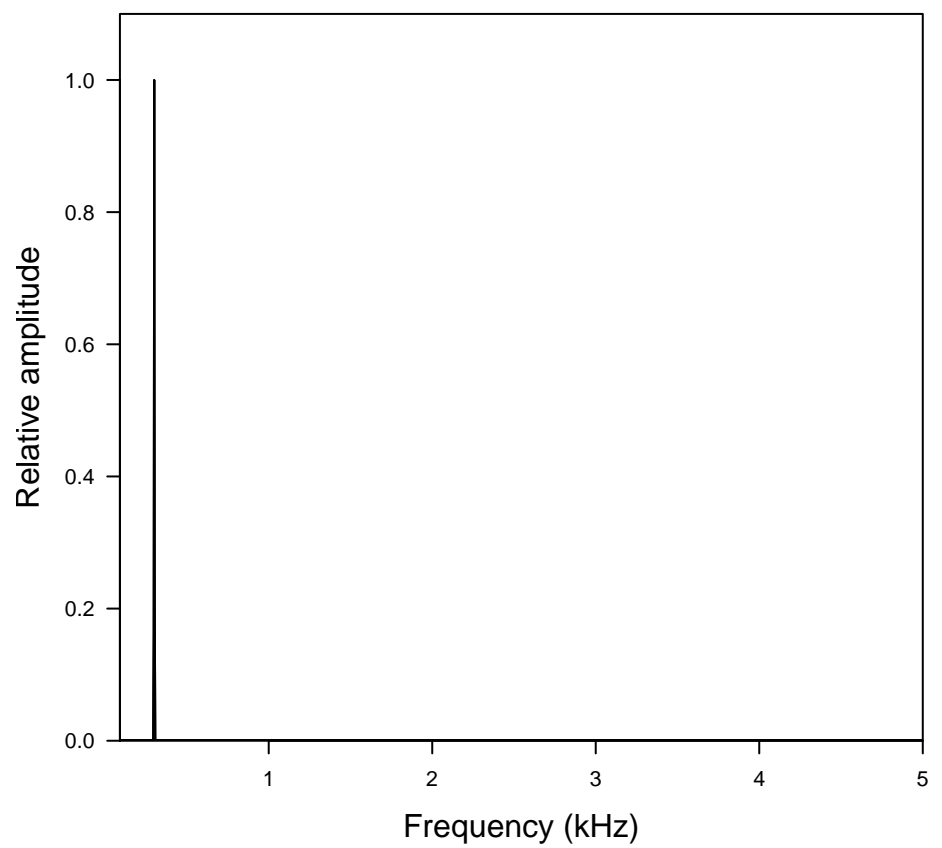

Vel. = 0.028 ; Str. = FA ; Axis = x ; Fl. accession = 10-s-77-12

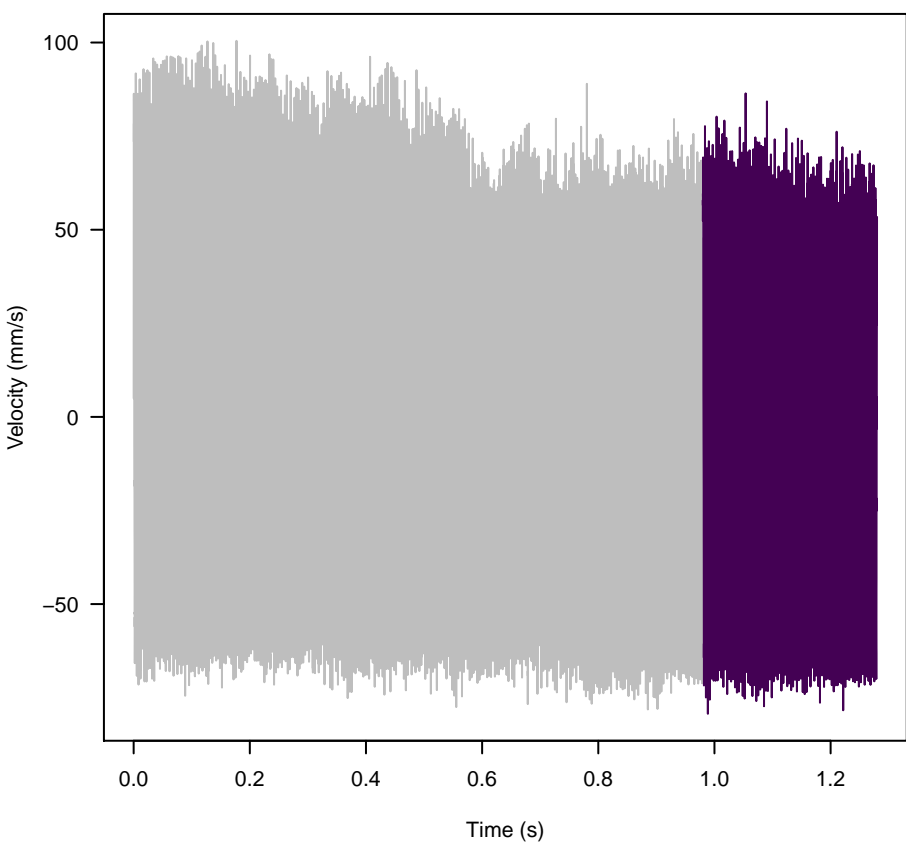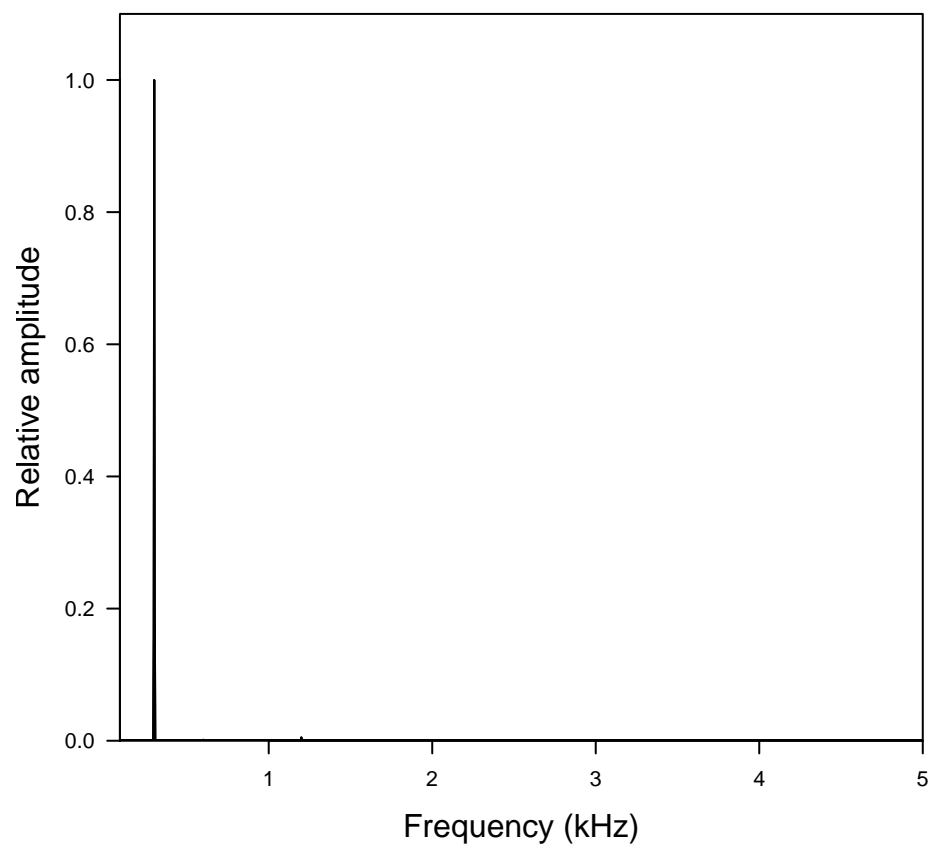

Vel. = 0.028 ; Str. = Receptacle ; Axis = x ; Fl. accession = 10-s-77-12

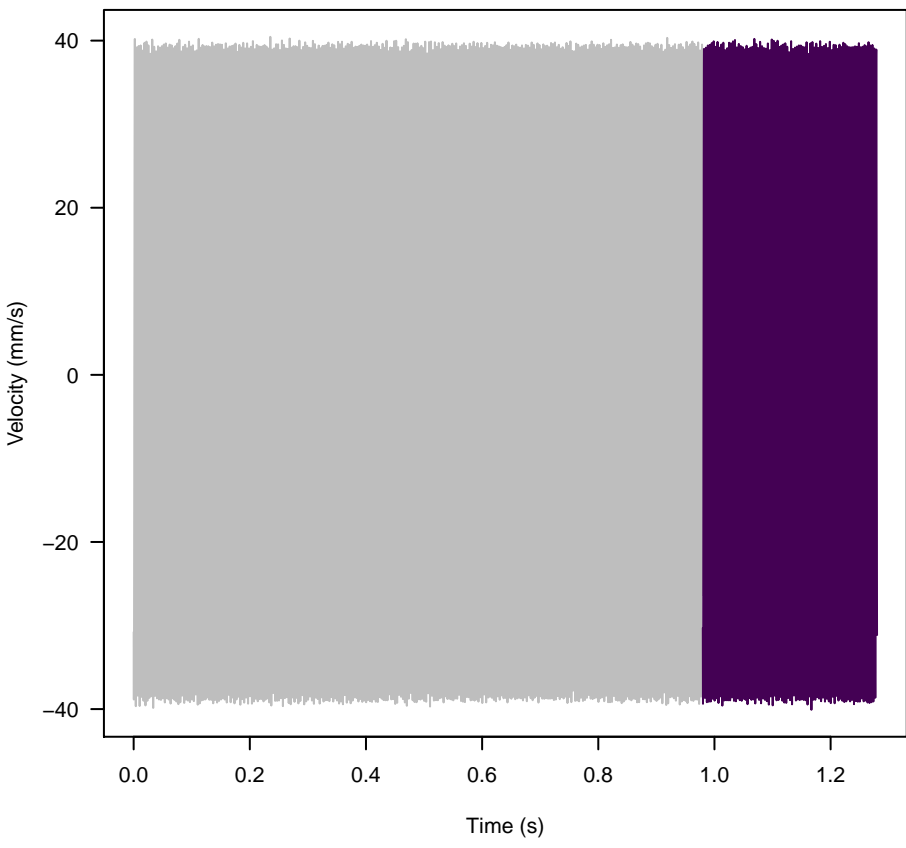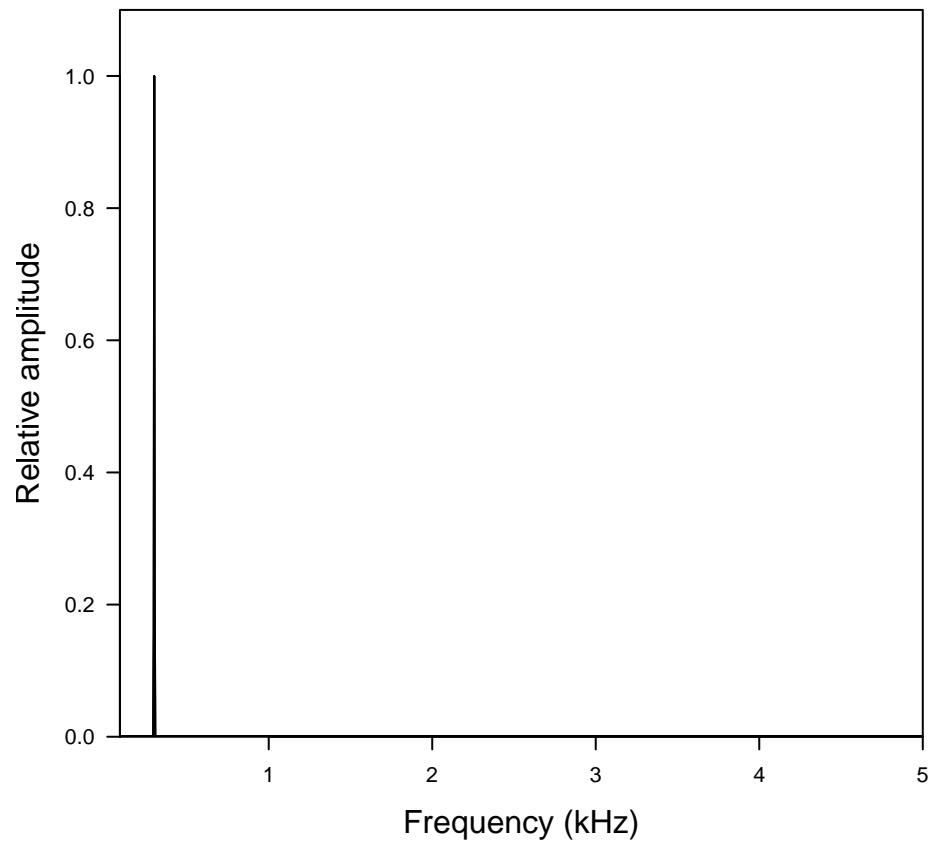

Vel. = 0.028 ; Str. = Corolla ; Axis = x ; Fl. accession = 10-s-77-12

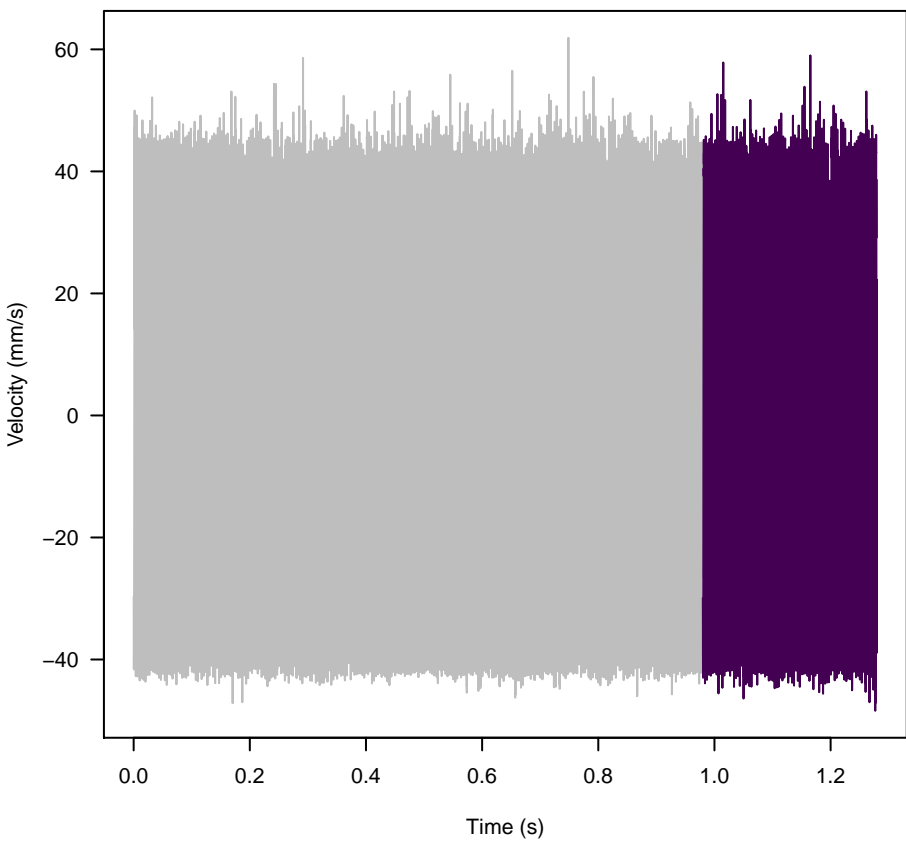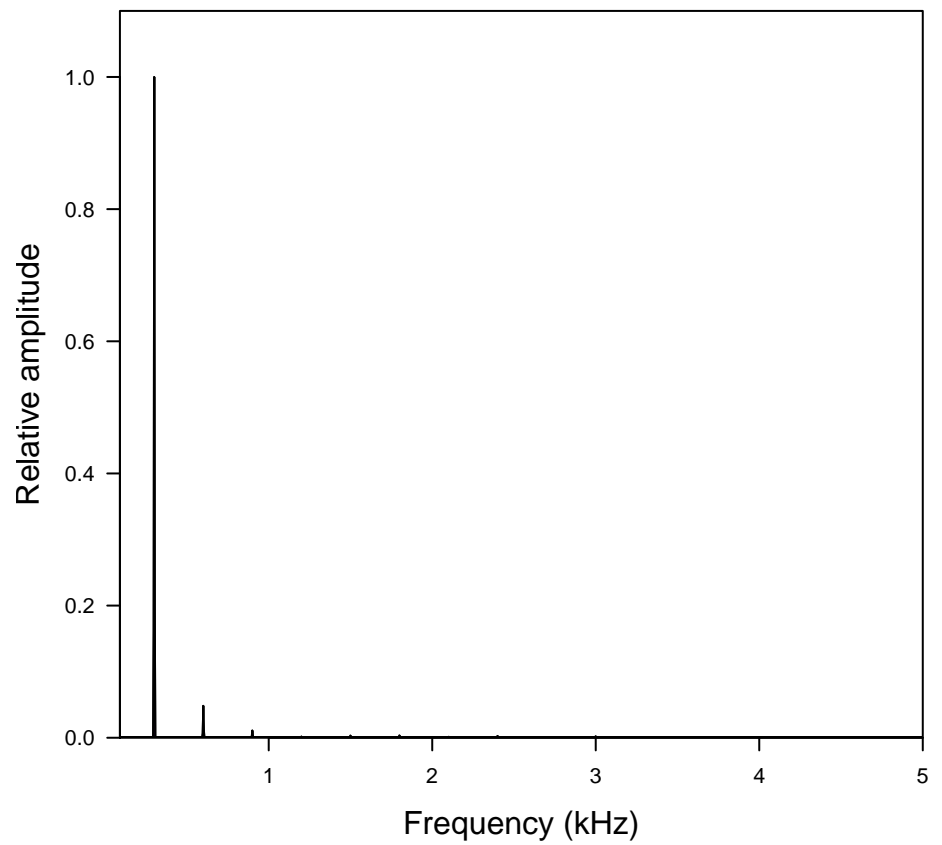

Vel. = 0.028 ; Str. = Receptacle ; Axis = x ; Fl. accession = 10-s-77-12

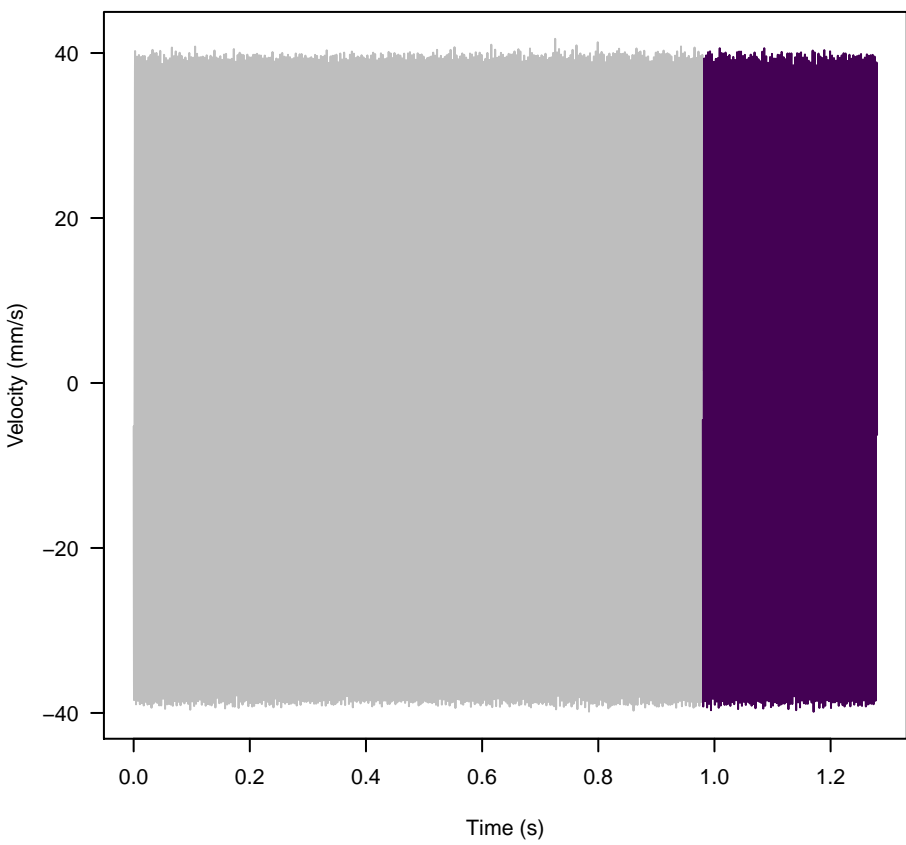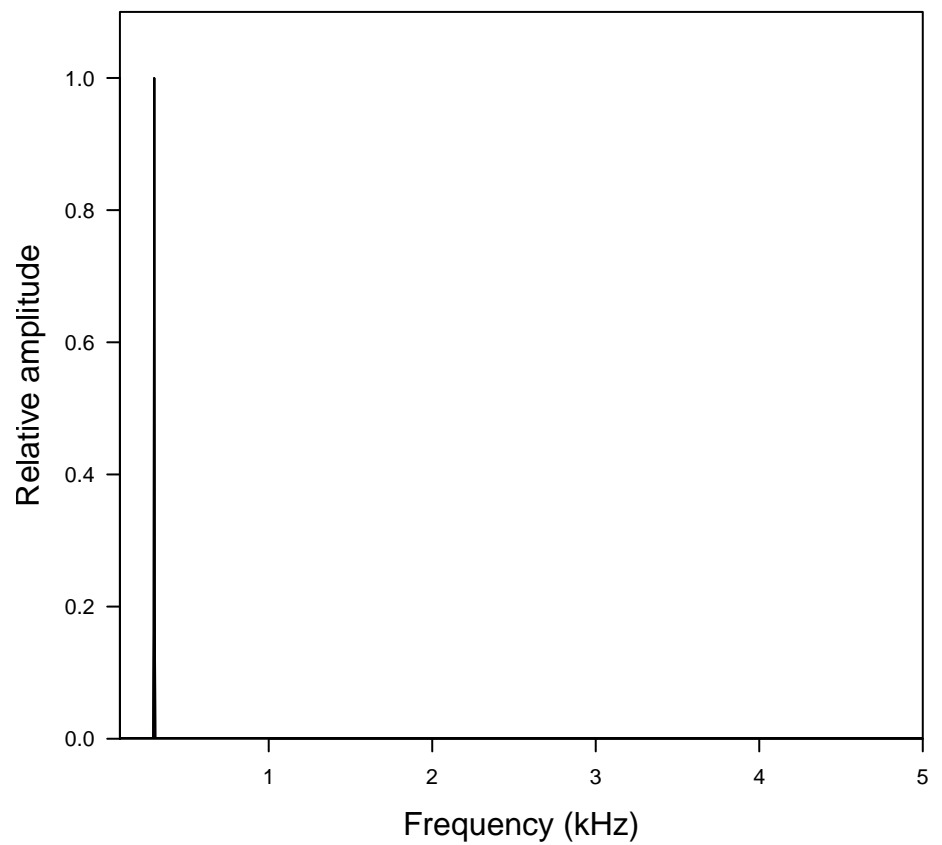

Vel. = 0.057 ; Str. = Corolla ; Axis = x ; Fl. accession = 10-s-77-12

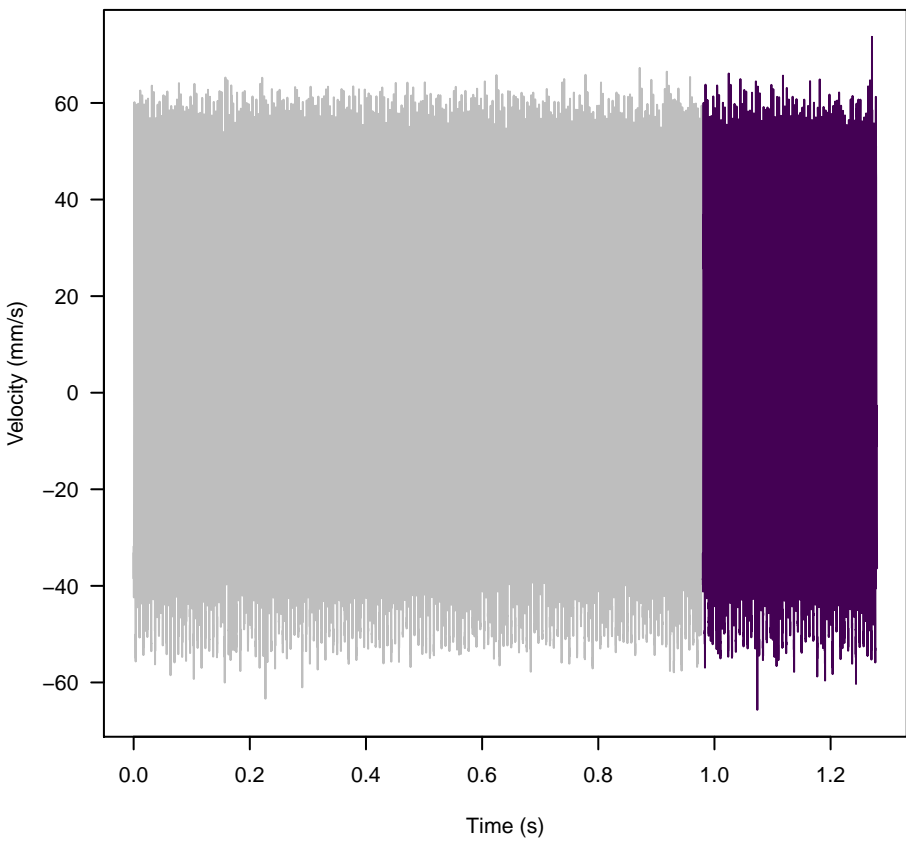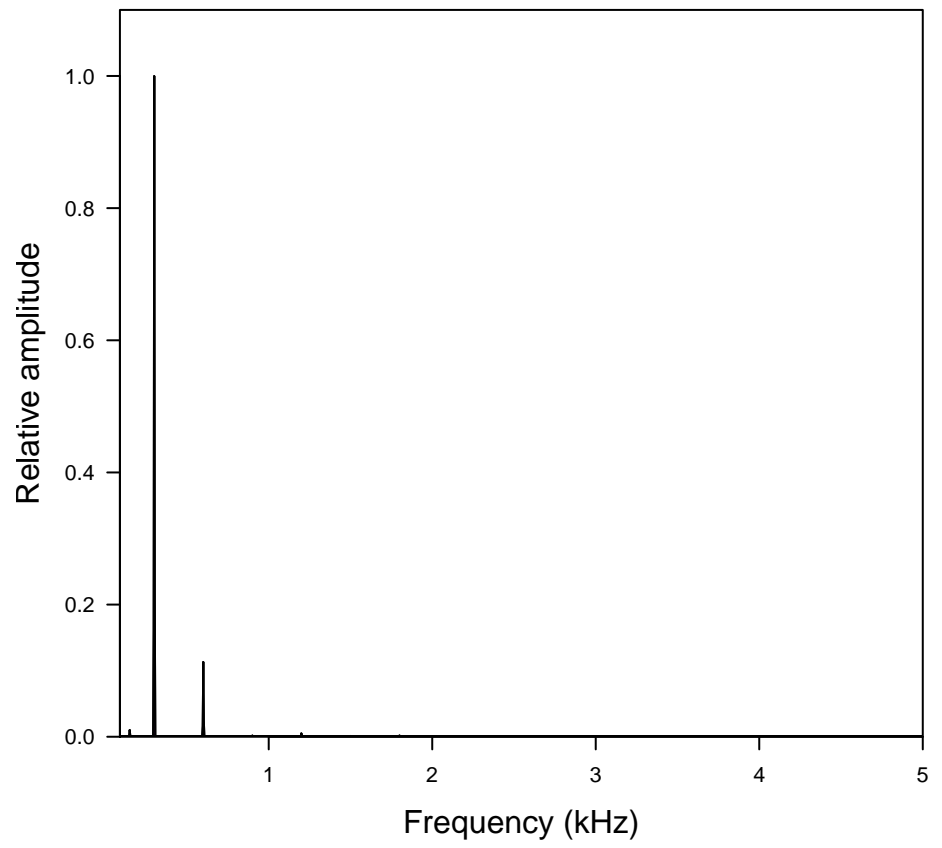

Vel. = 0.057 ; Str. = Receptacle ; Axis = x ; Fl. accession = 10-s-77-12

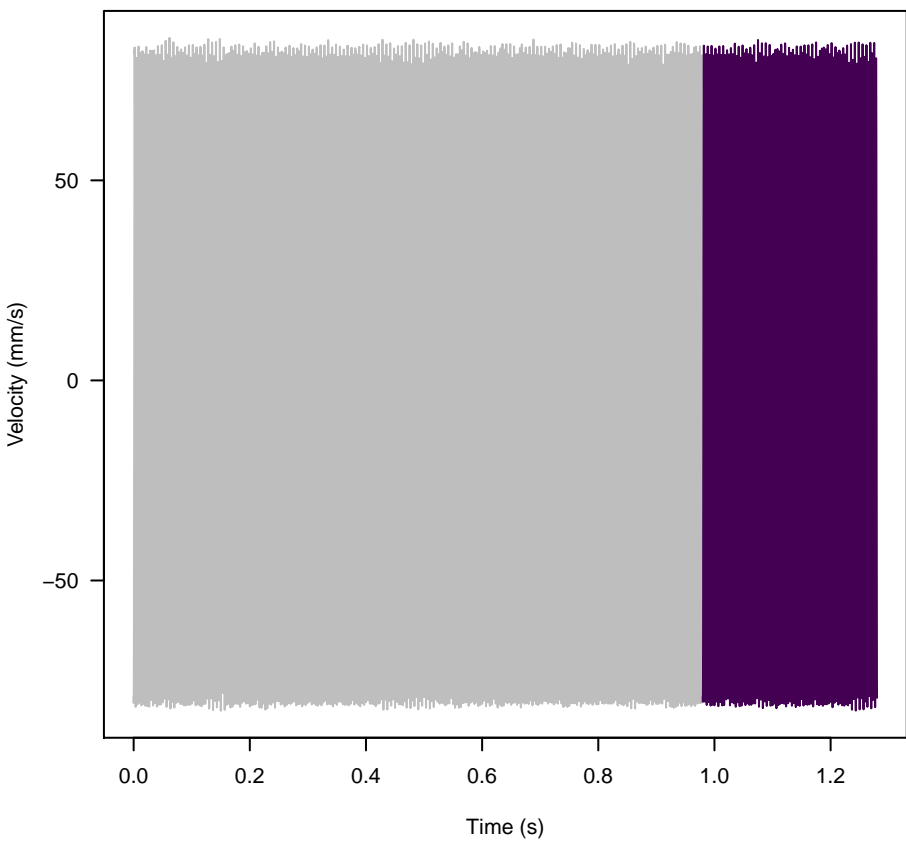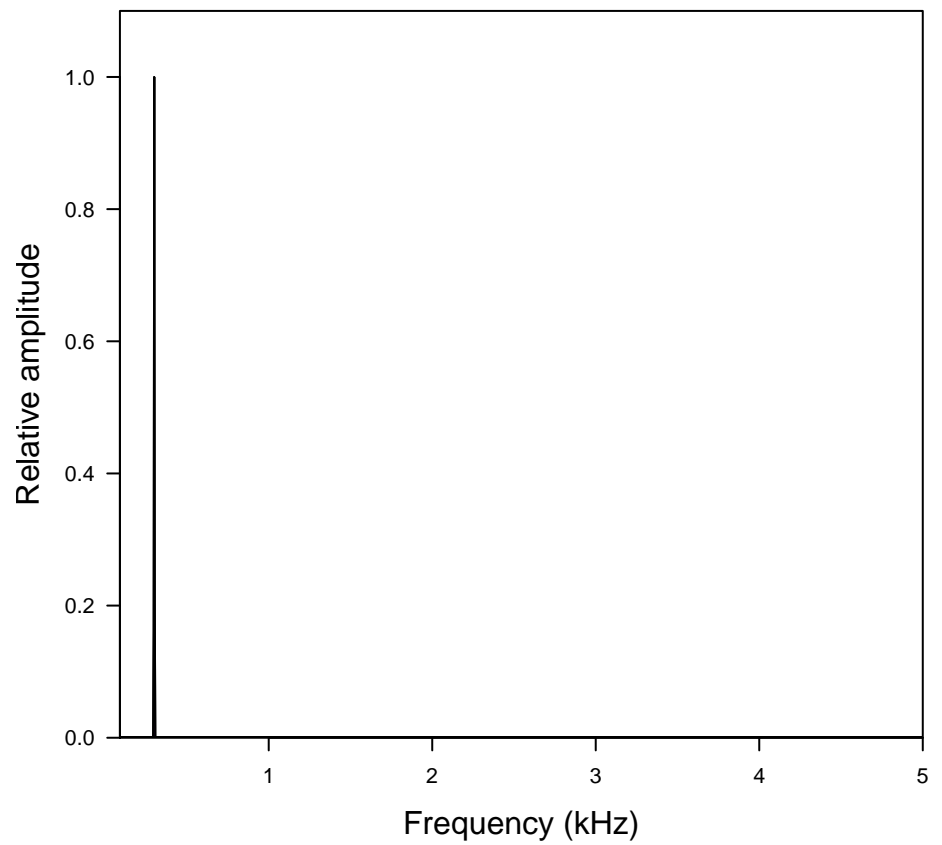

Vel. = 0.057 ; Str. = FA ; Axis = x ; Fl. accession = 10-s-77-12

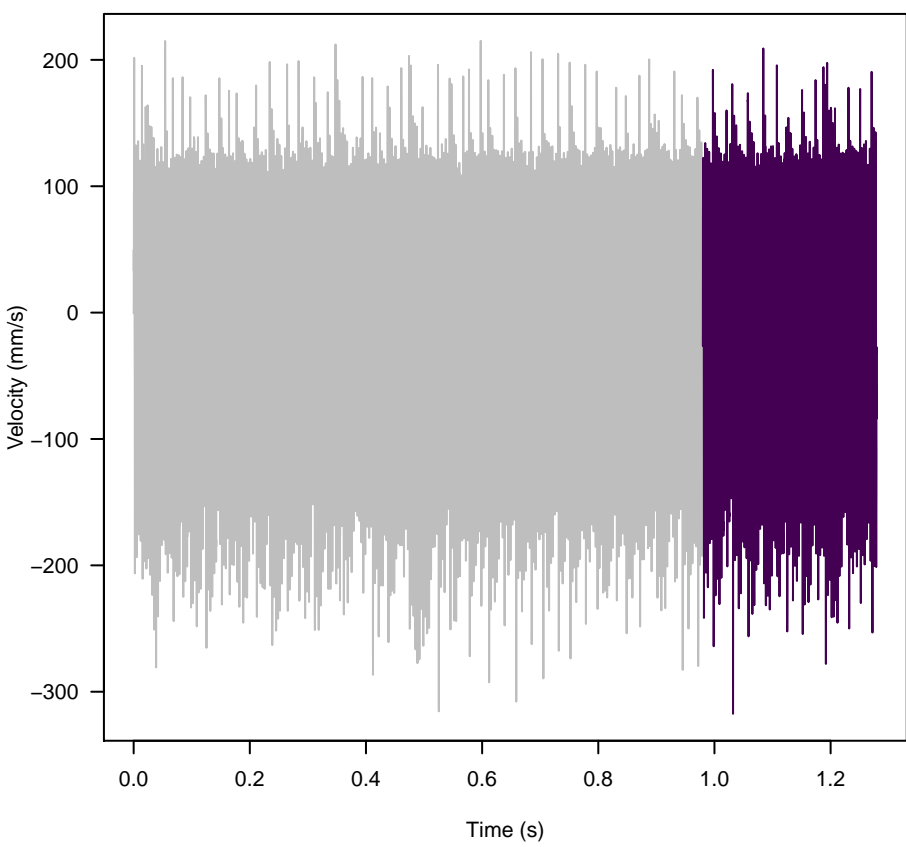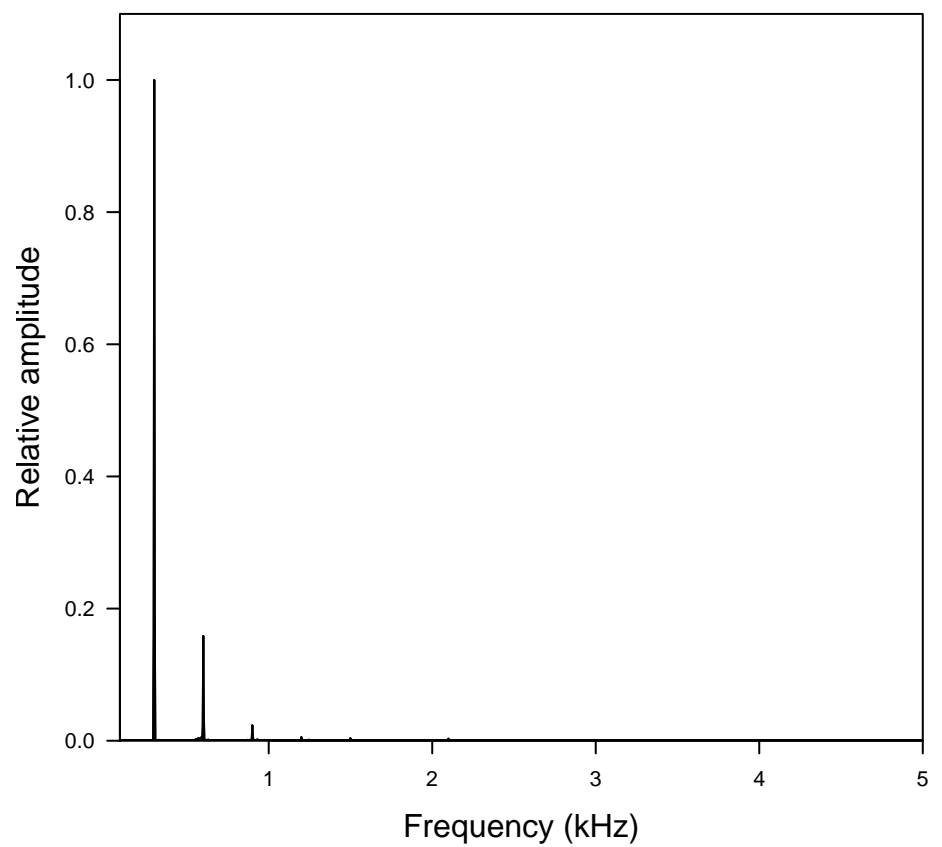

Vel. = 0.057 ; Str. = Receptacle ; Axis = x ; Fl. accession = 10-s-77-12

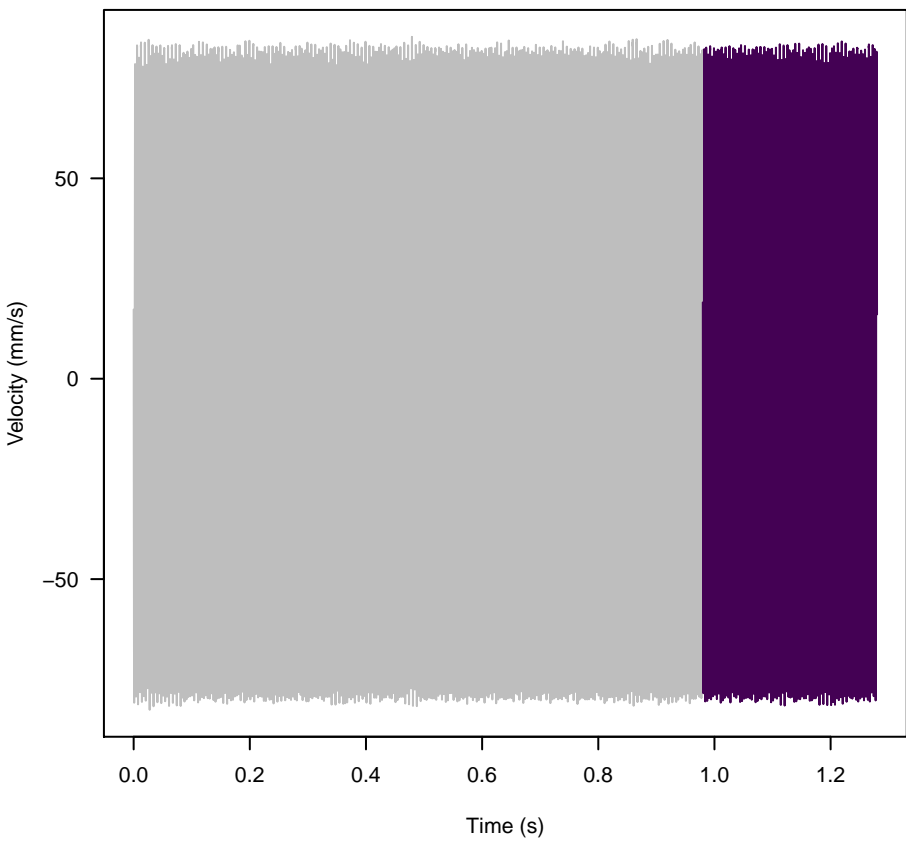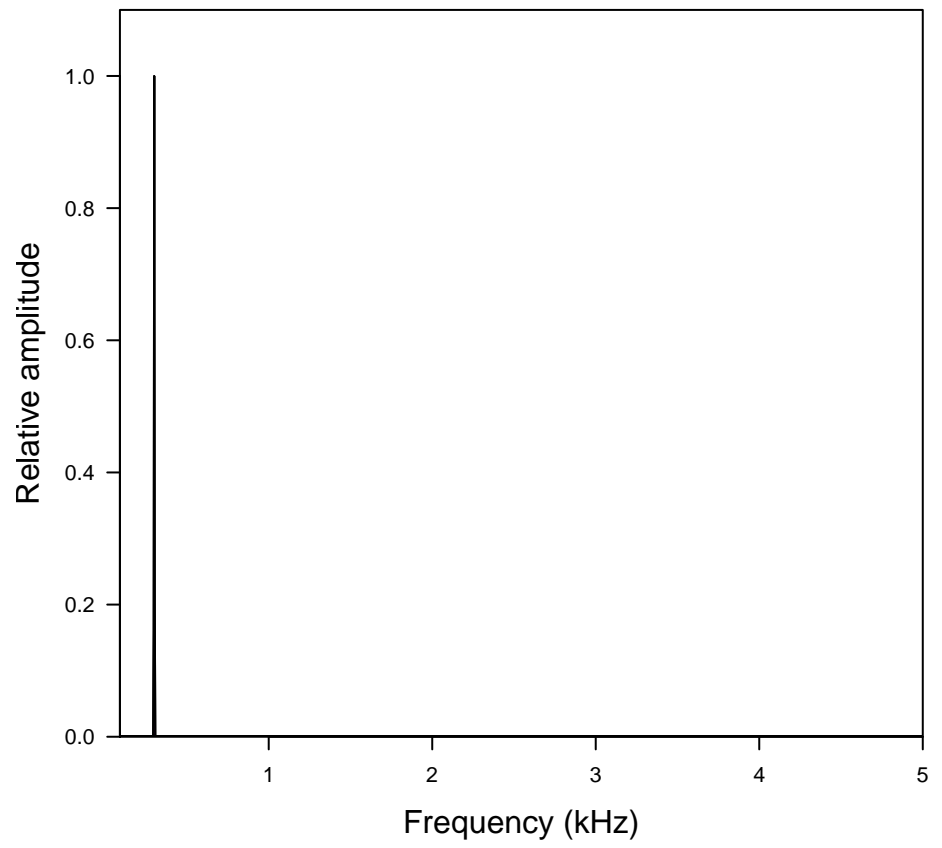

Vel. = 0.057 ; Str. = PA ; Axis = x ; Fl. accession = 10-s-77-12

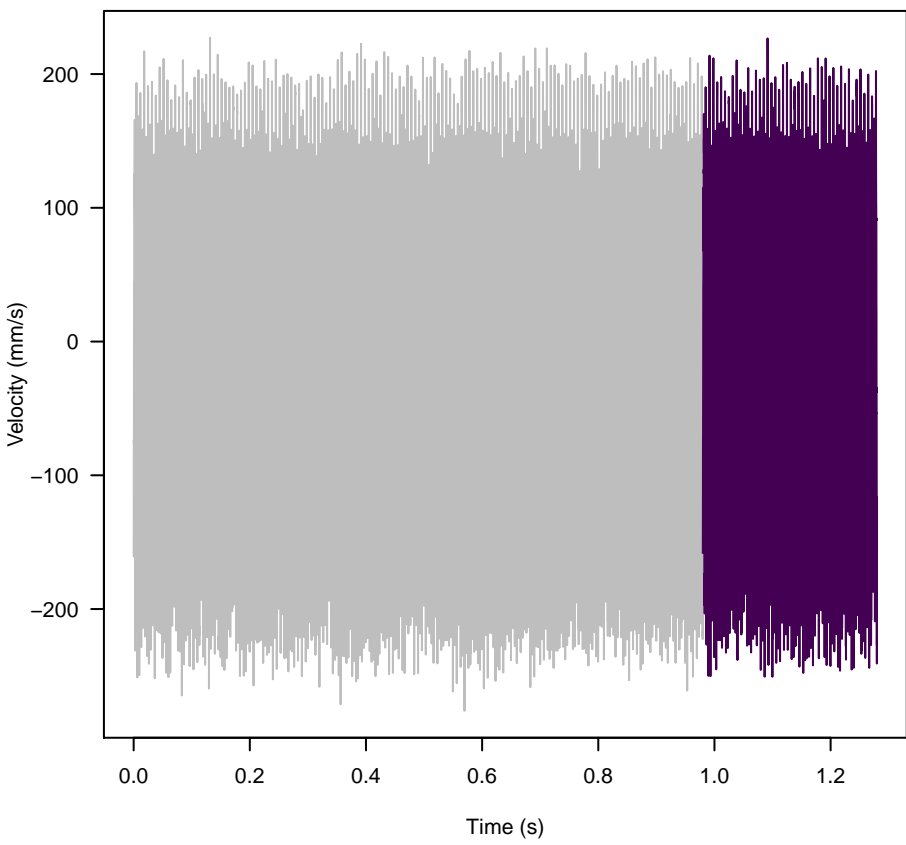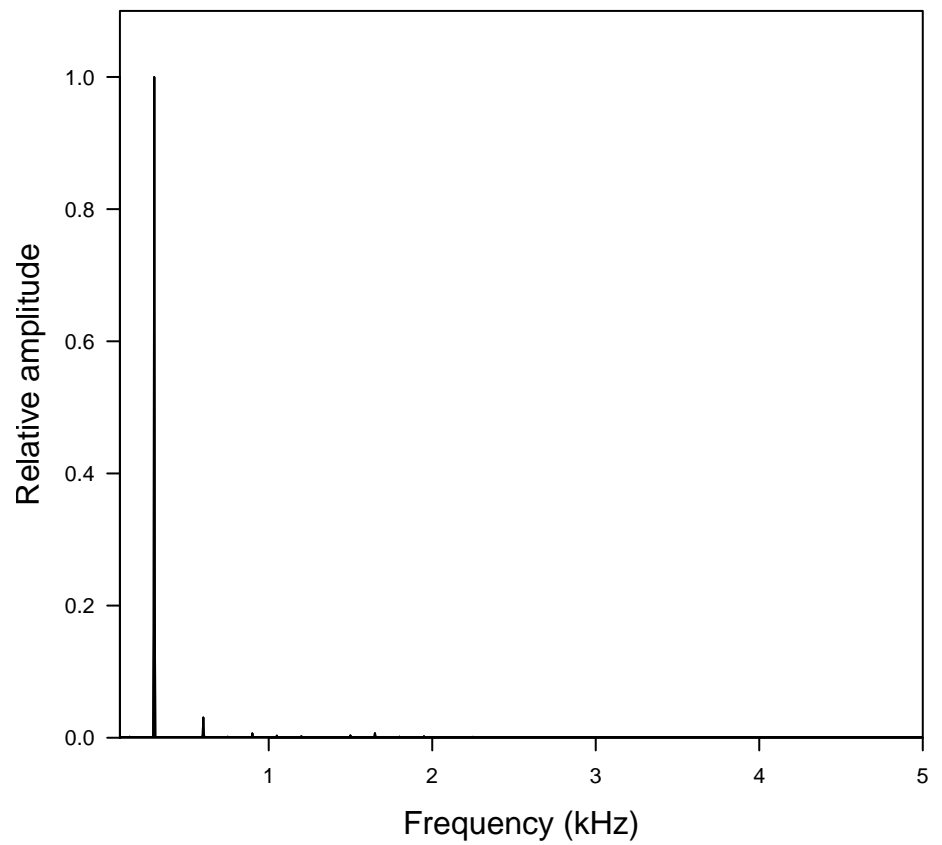

Vel. = 0.057 ; Str. = Receptacle ; Axis = x ; Fl. accession = 10-s-77-12

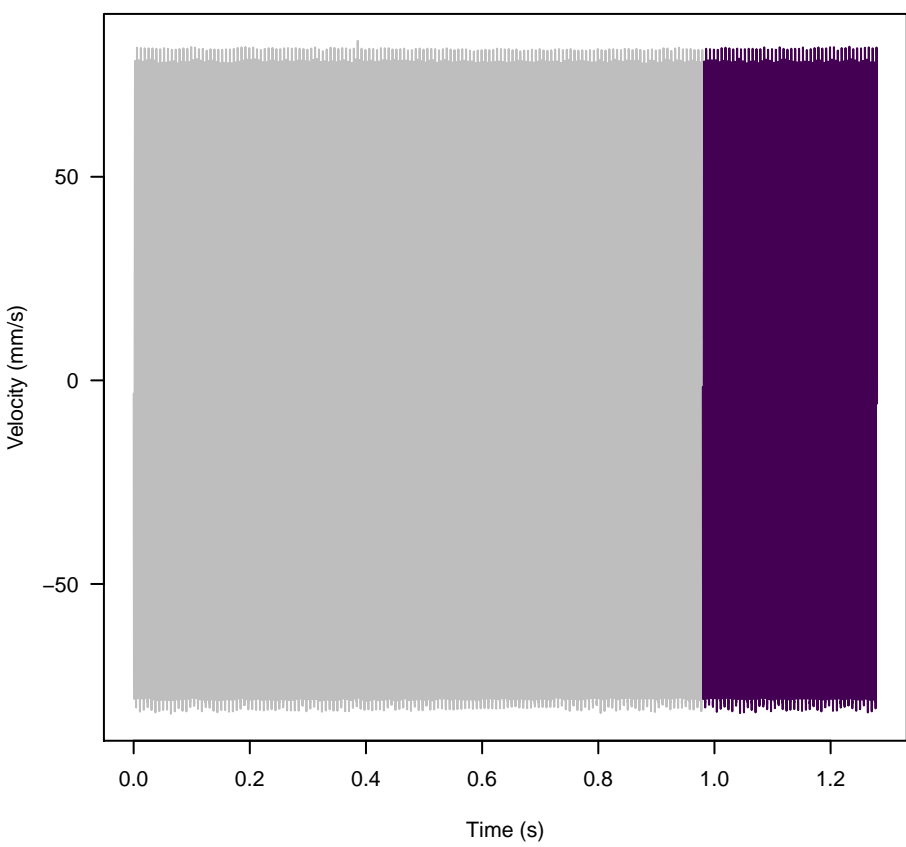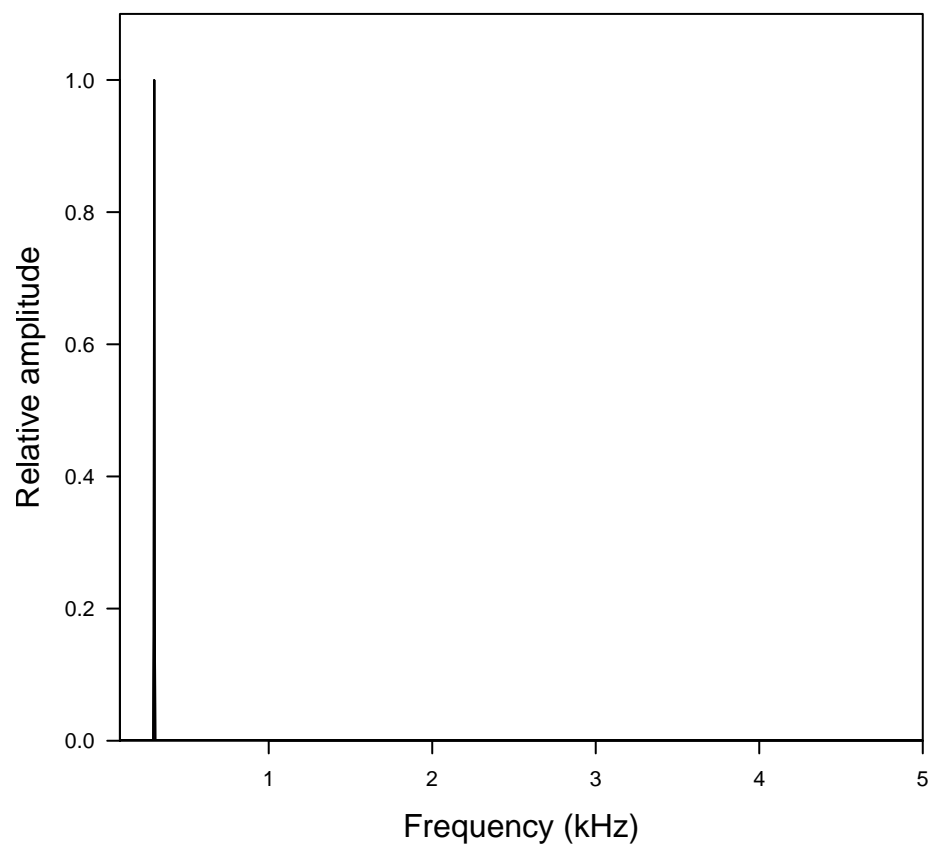

Vel. = 0.057 ; Str. = Corolla ; Axis = z ; Fl. accession = 10-s-77-12

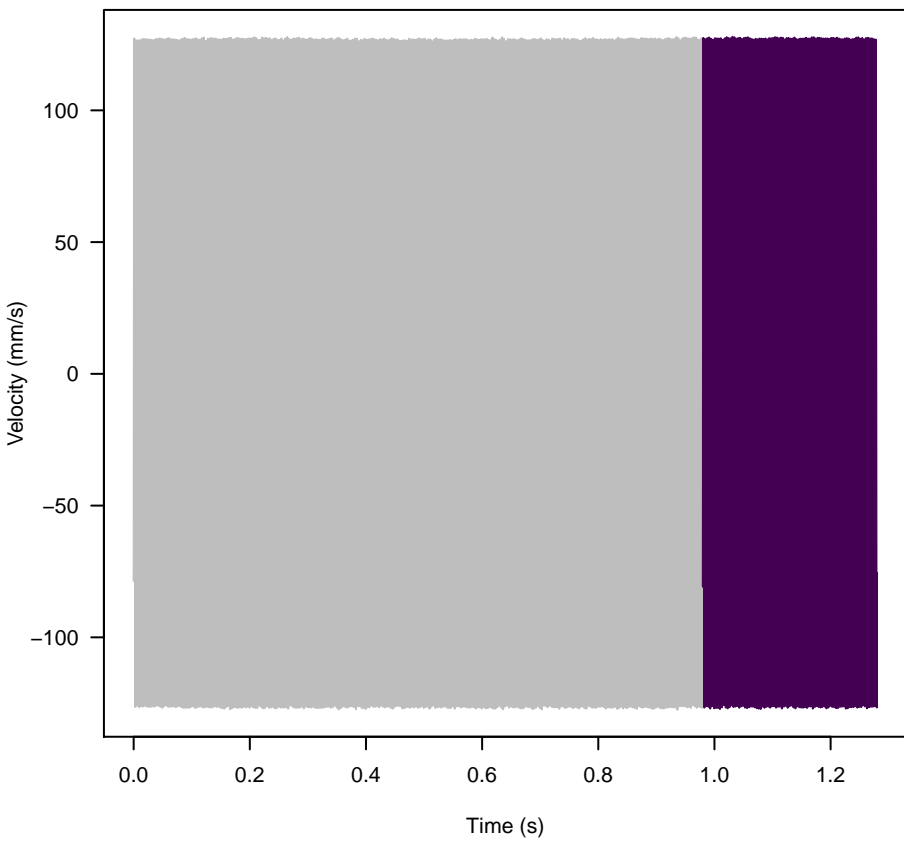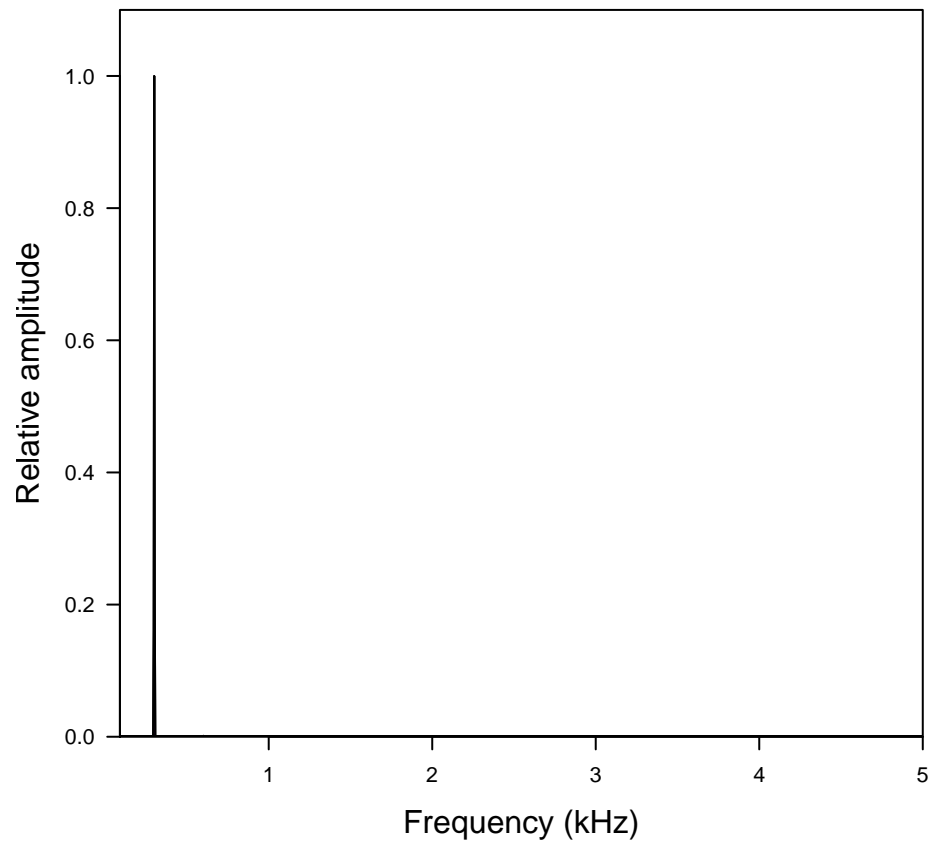

Vel. = 0.057 ; Str. = Receptacle ; Axis = z ; Fl. accession = 10-s-77-12

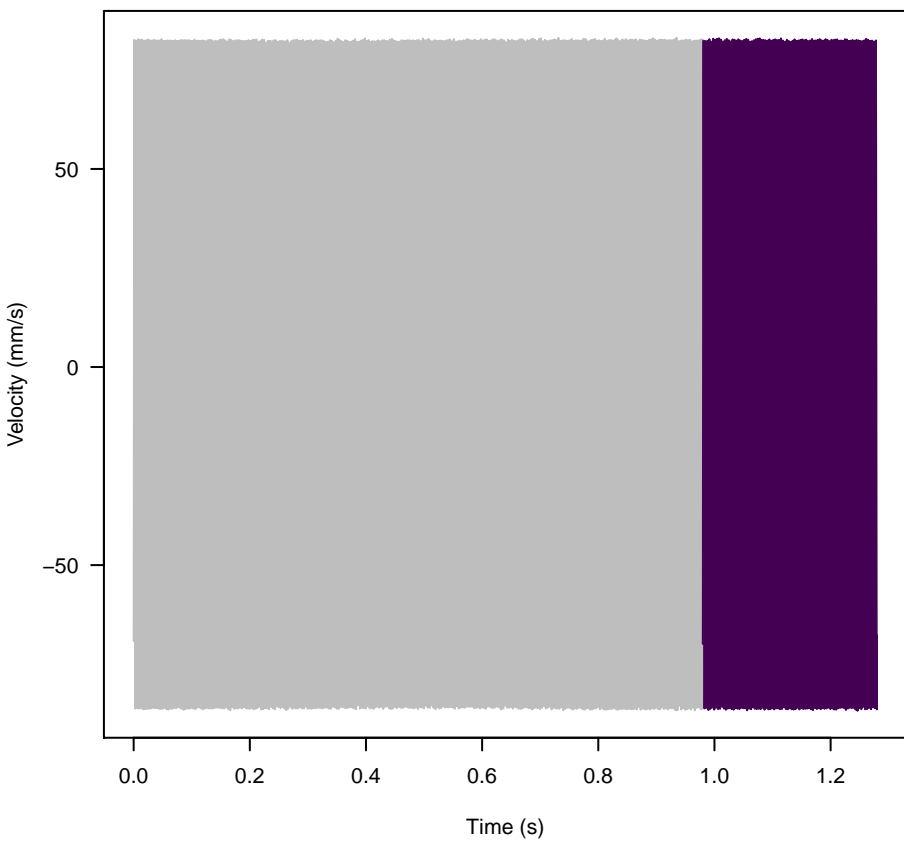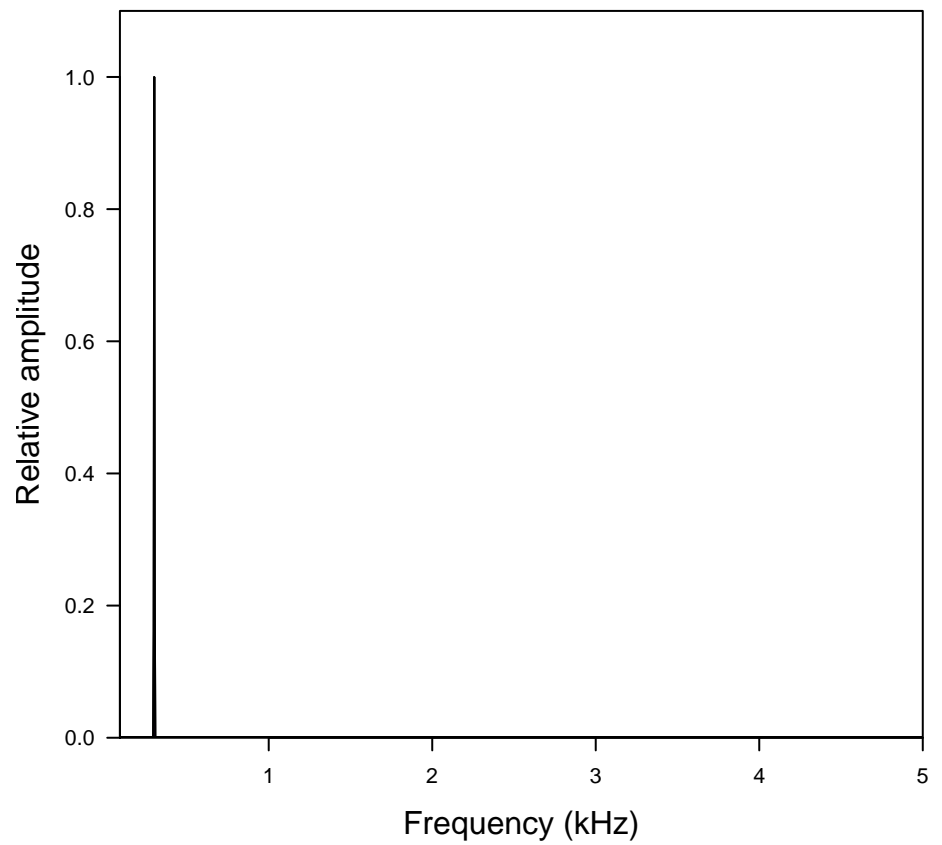

Vel. = 0.057 ; Str. = FA ; Axis = z ; Fl. accession = 10-s-77-12

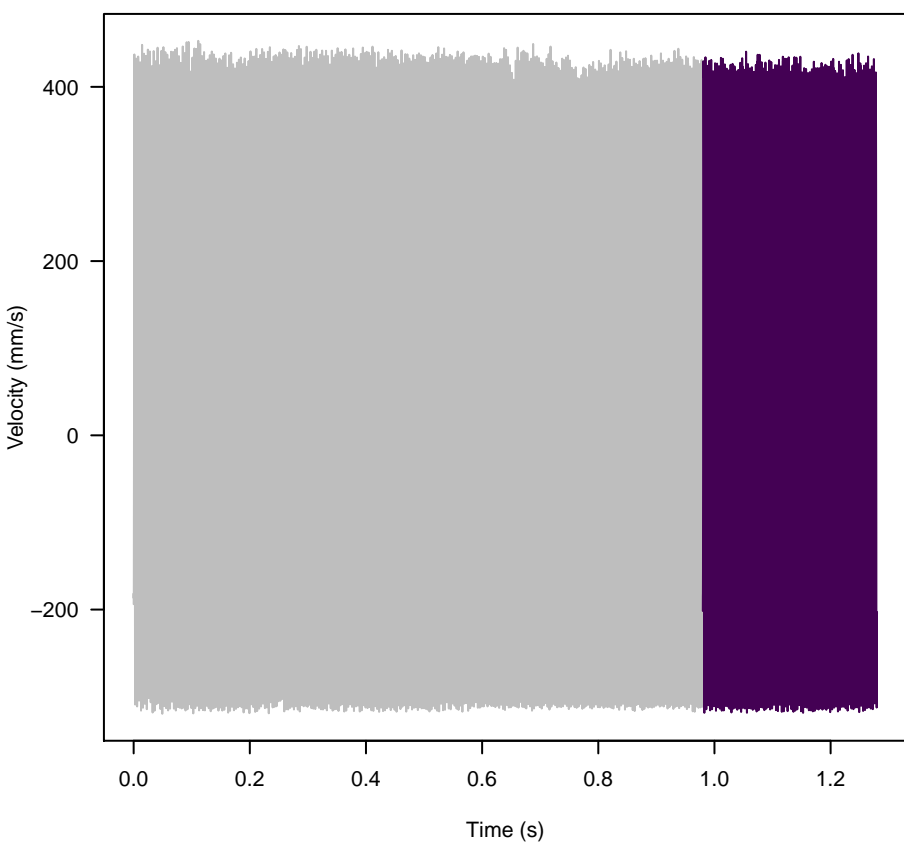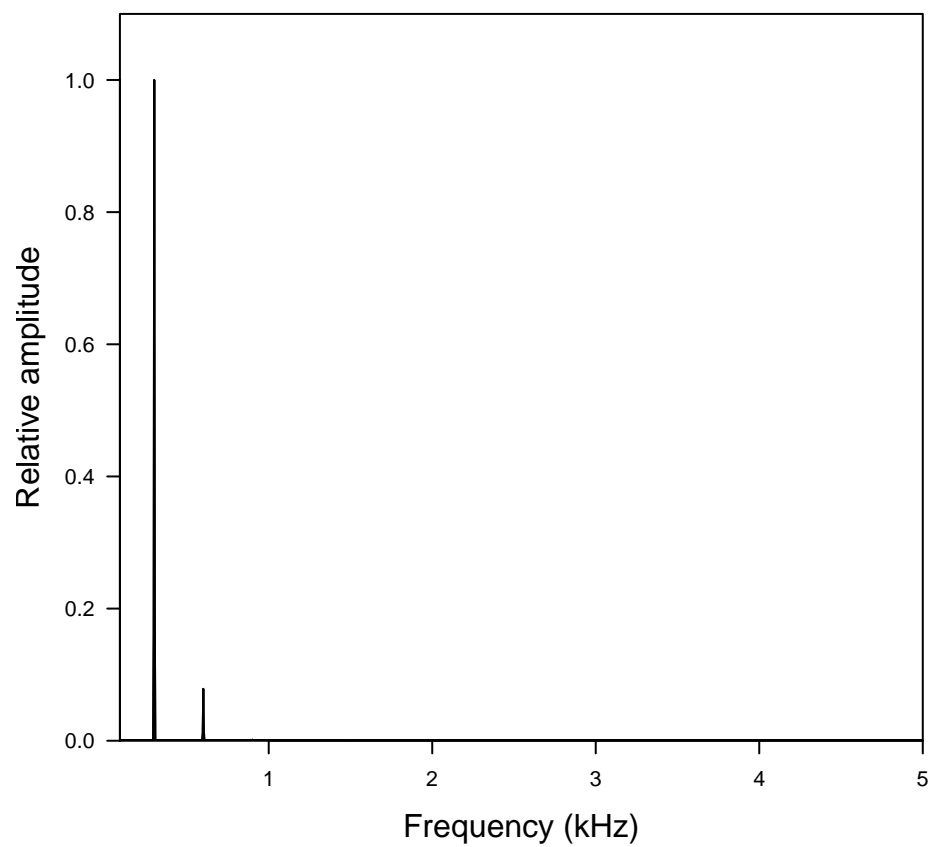

Vel. = 0.057 ; Str. = Receptacle ; Axis = z ; Fl. accession = 10-s-77-12

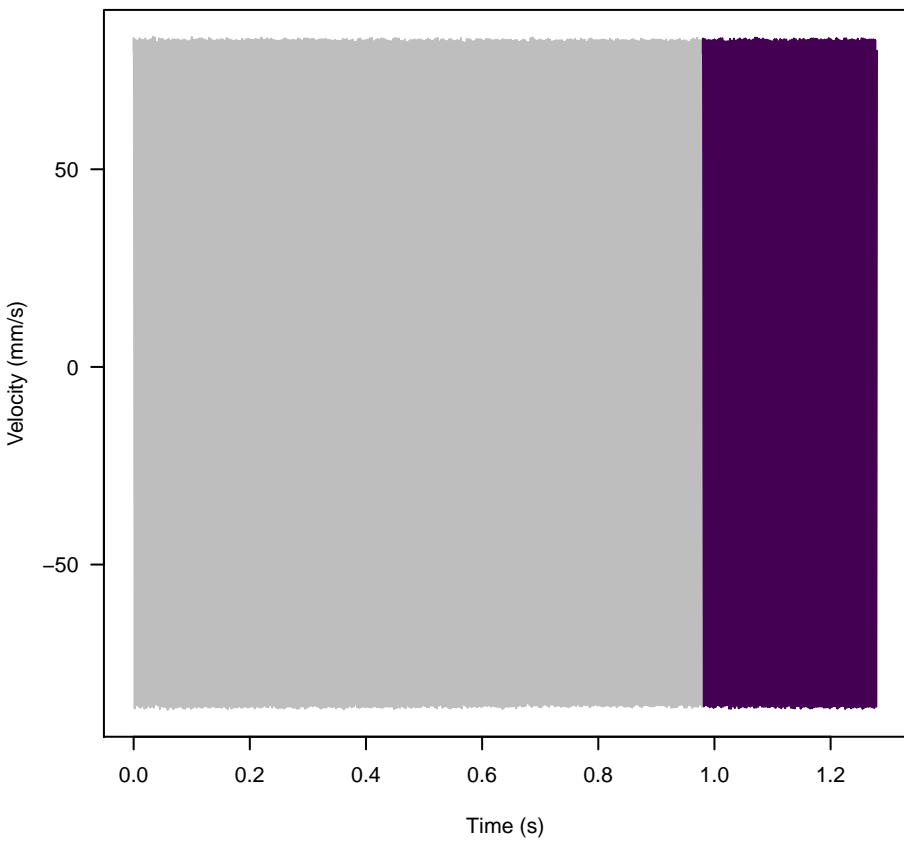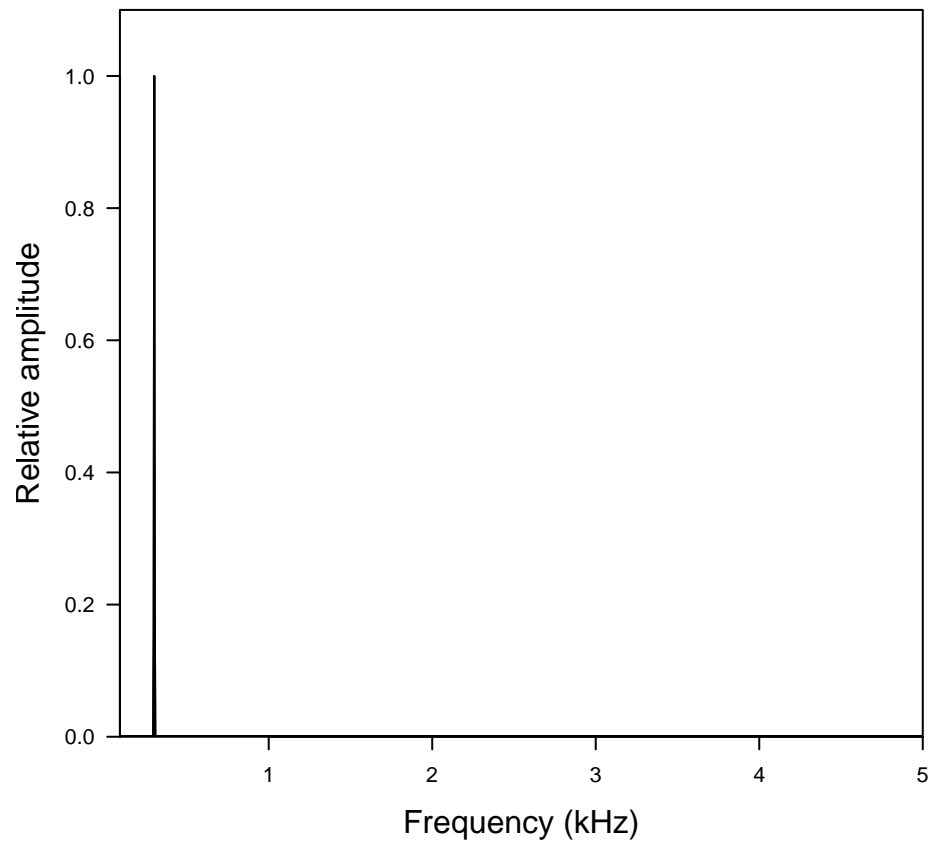

Vel. = 0.057 ; Str. = PA ; Axis = z ; Fl. accession = 10-s-77-12

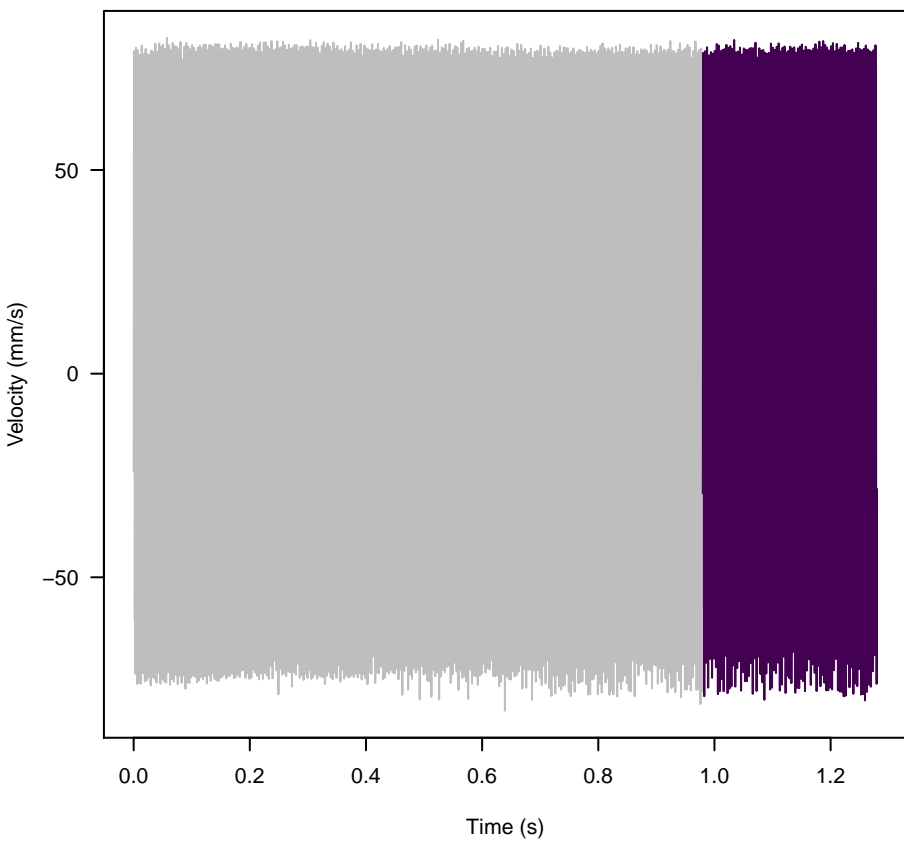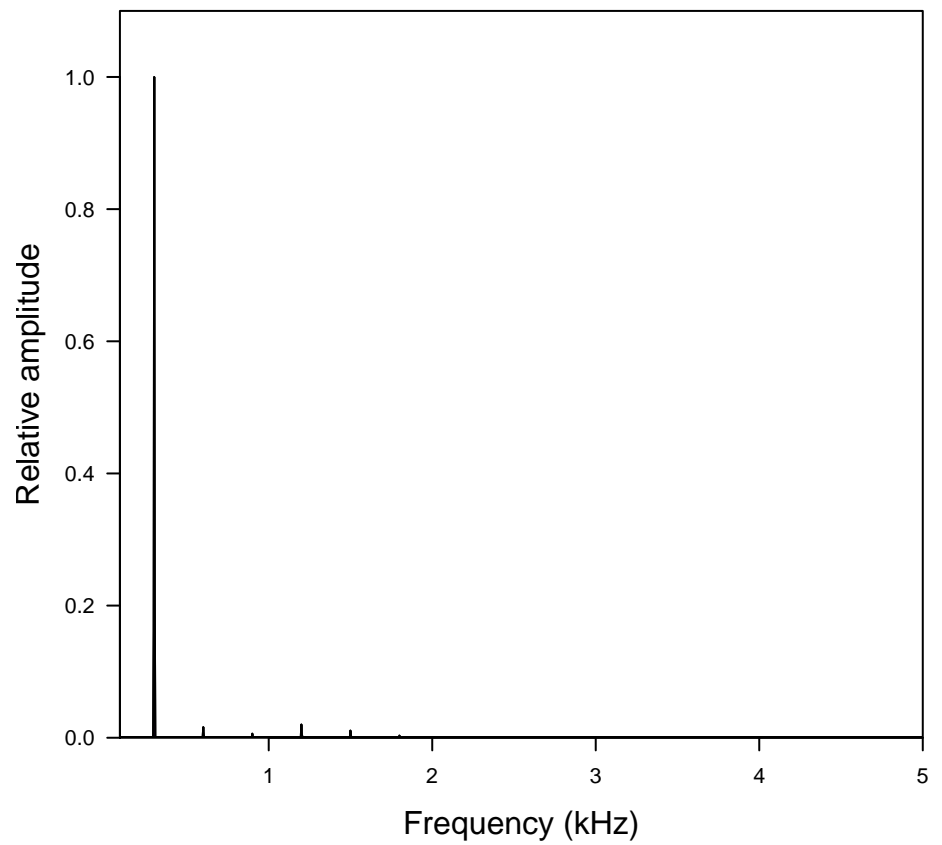

Vel. = 0.057 ; Str. = Receptacle ; Axis = z ; Fl. accession = 10-s-77-12

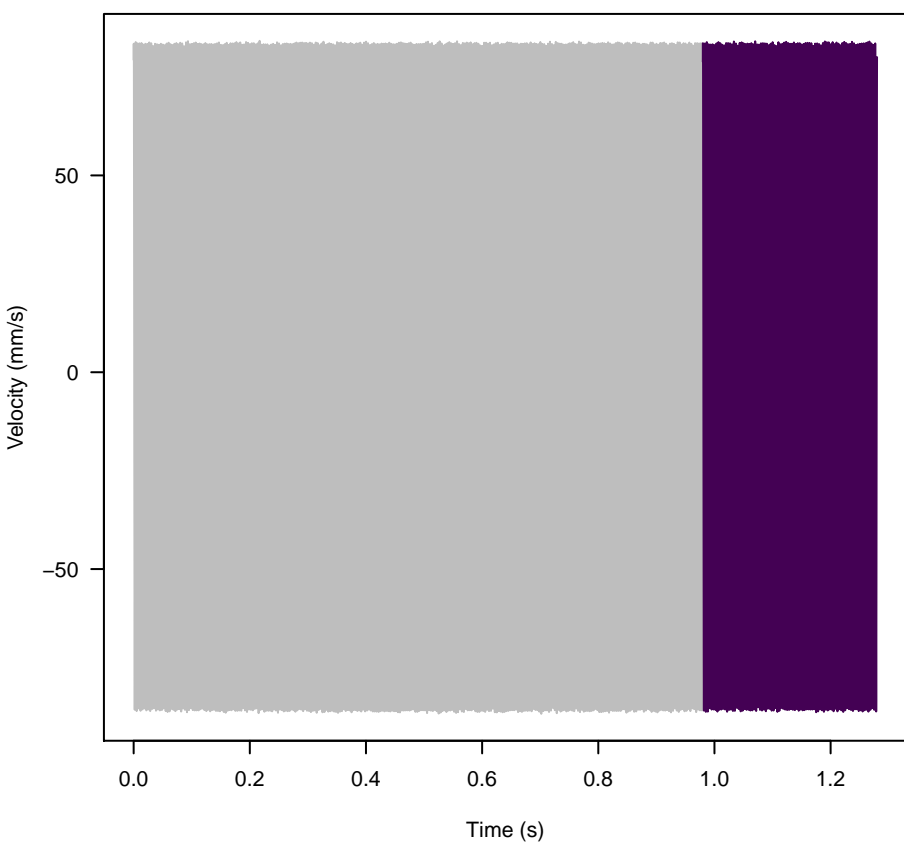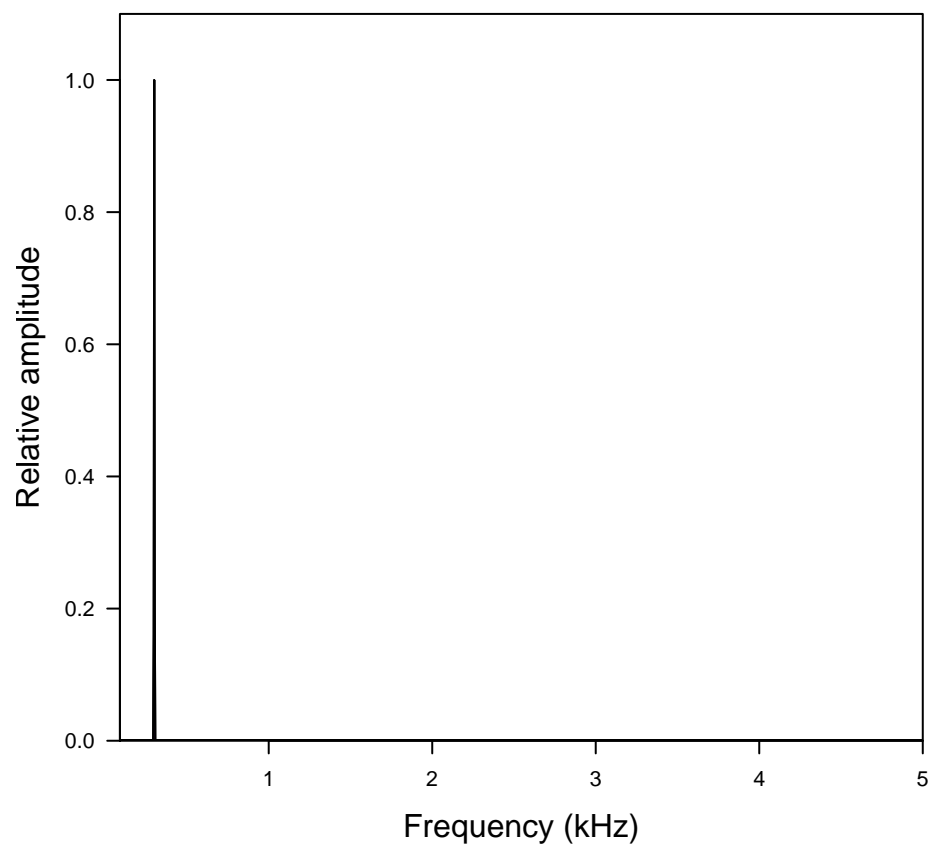



Vel. = 0.028 ; Str. = PA ; Axis = z ; Fl. accession = 10-s-77-12

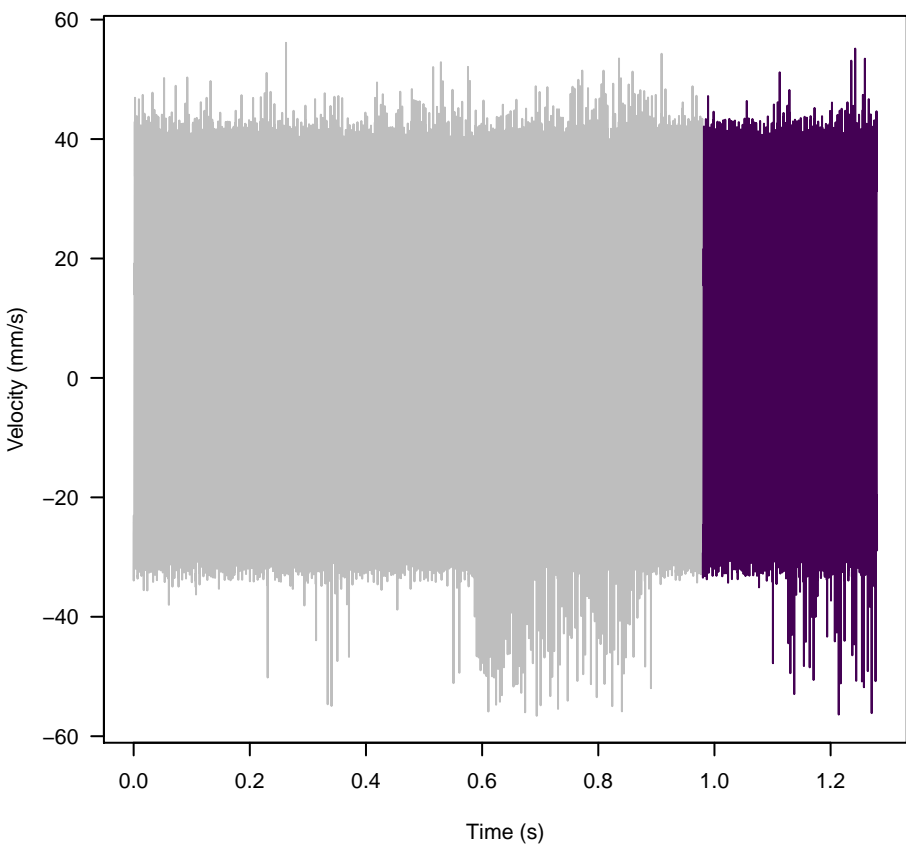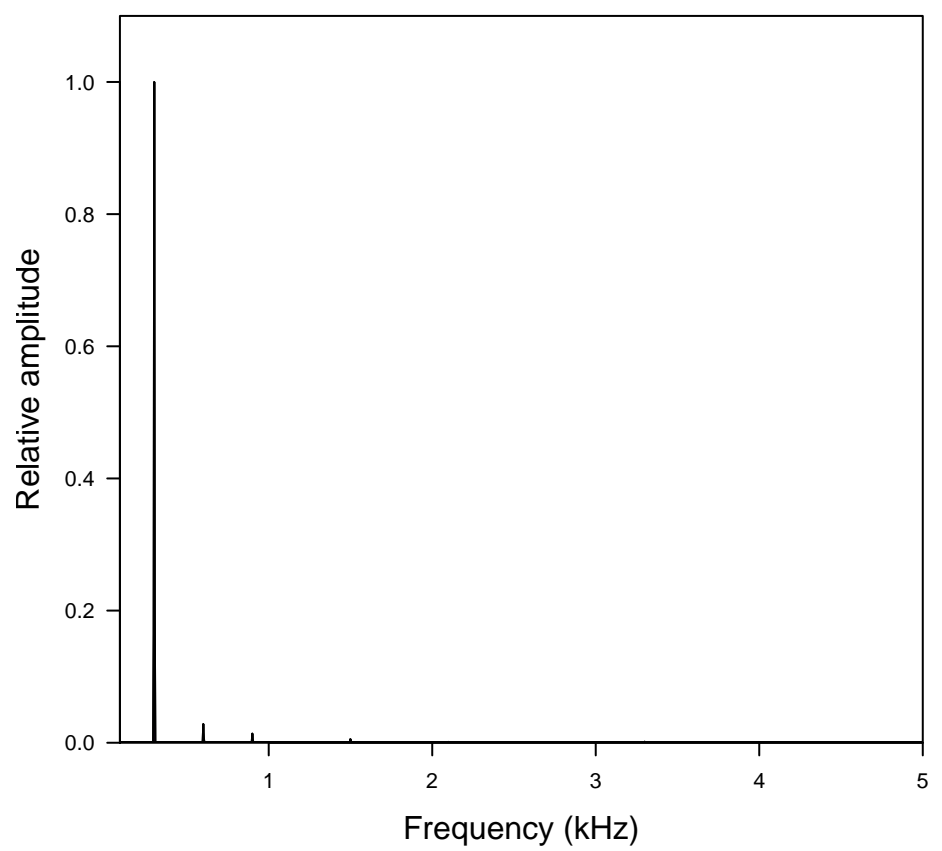

Vel. = 0.028 ; Str. = Receptacle ; Axis = z ; Fl. accession = 10-s-77-12

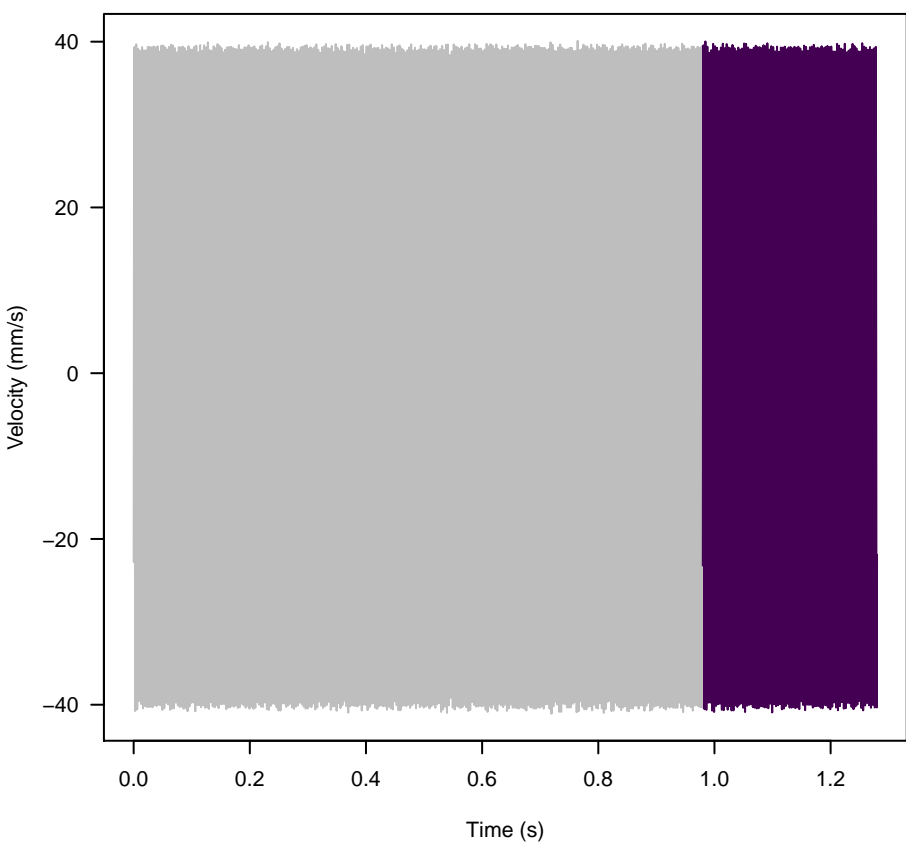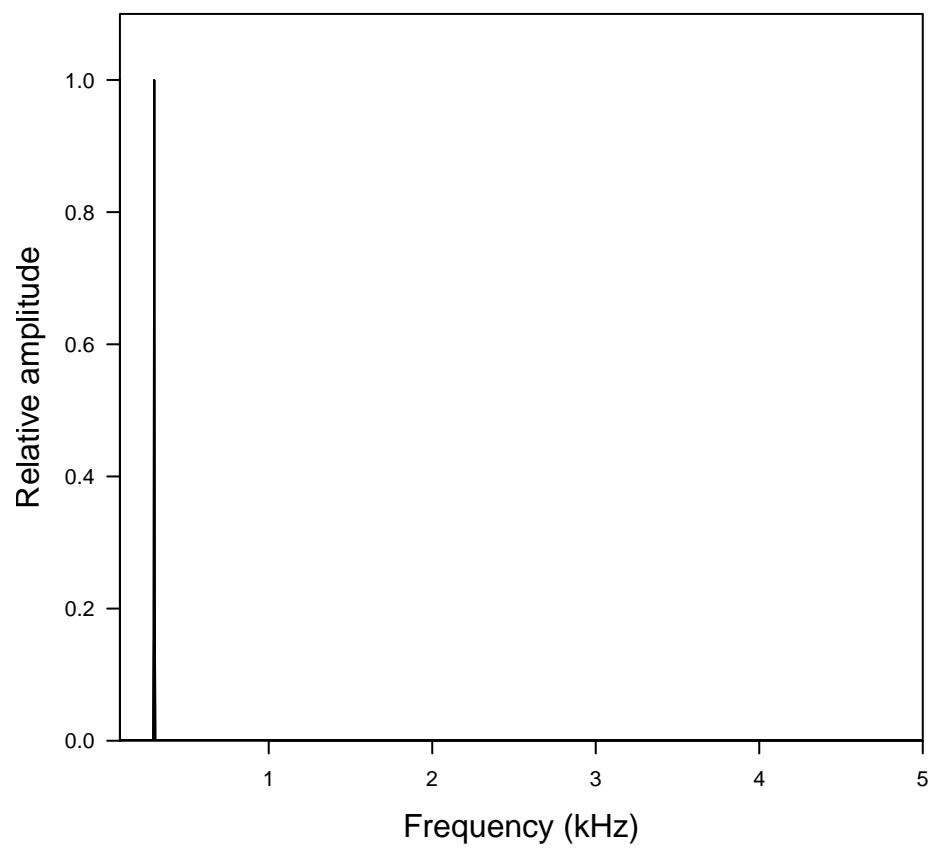

Vel. = 0.028 ; Str. = FA ; Axis = z ; Fl. accession = 10-s-77-12

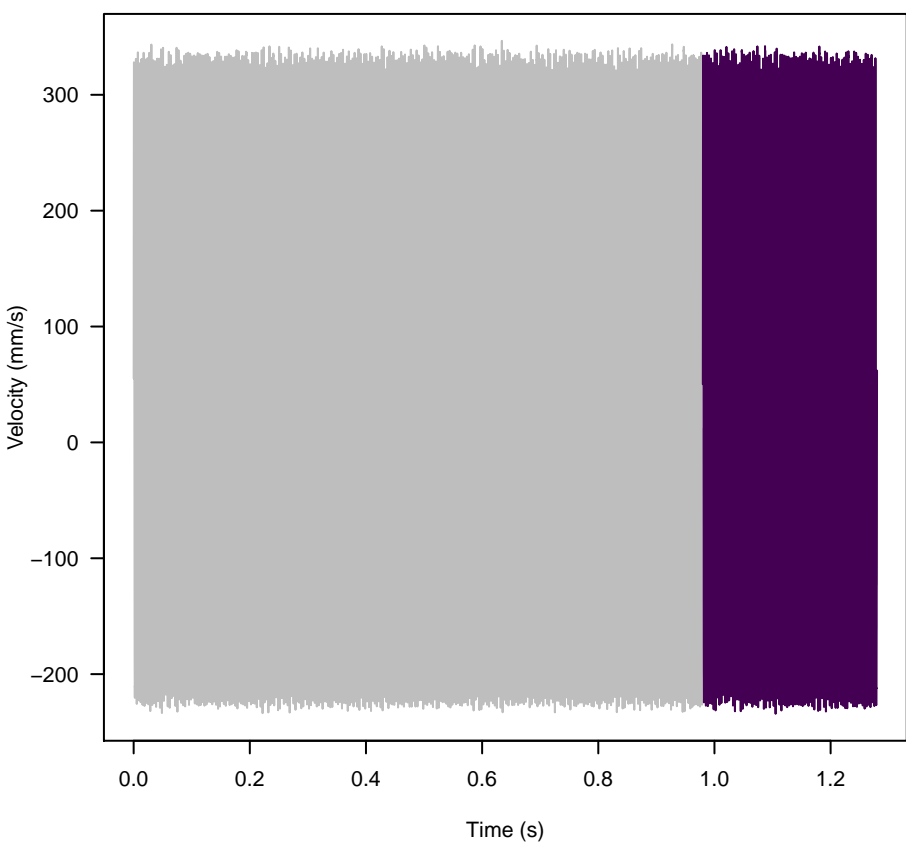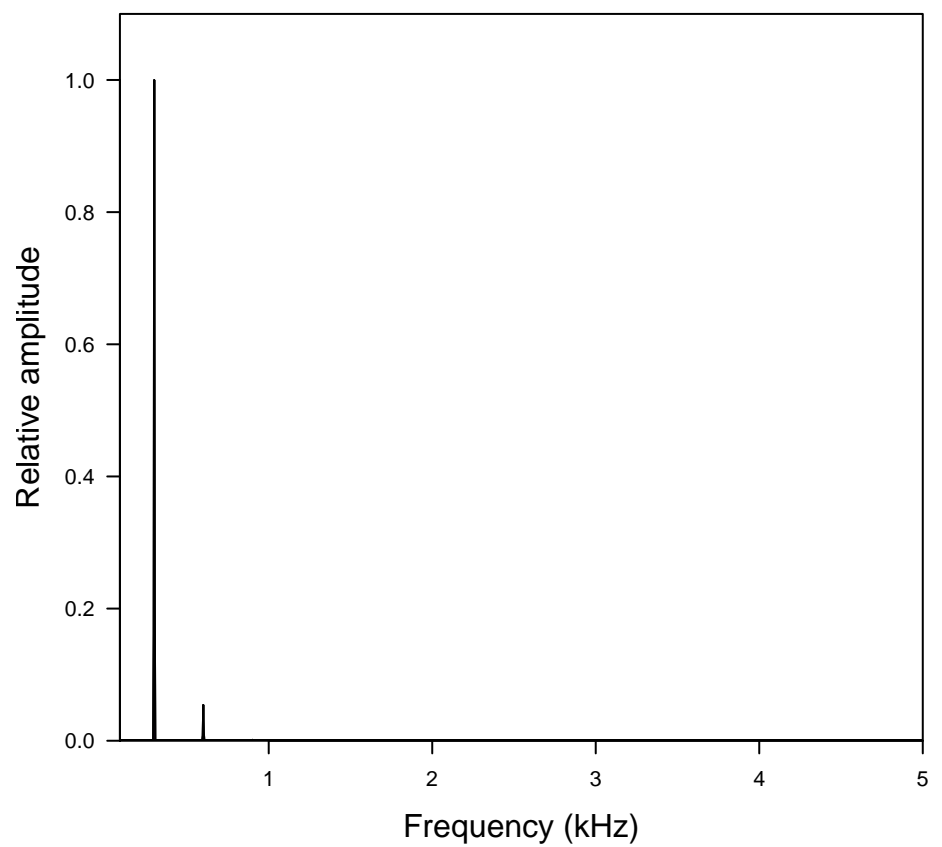

Vel. = 0.028 ; Str. = Receptacle ; Axis = z ; Fl. accession = 10-s-77-12

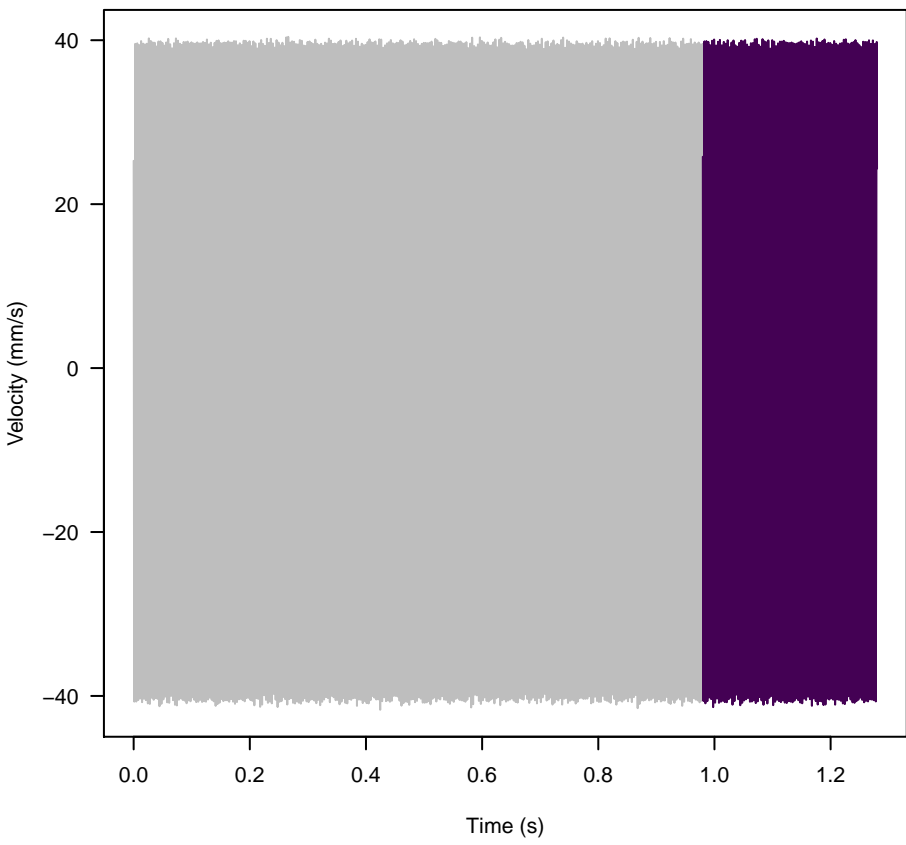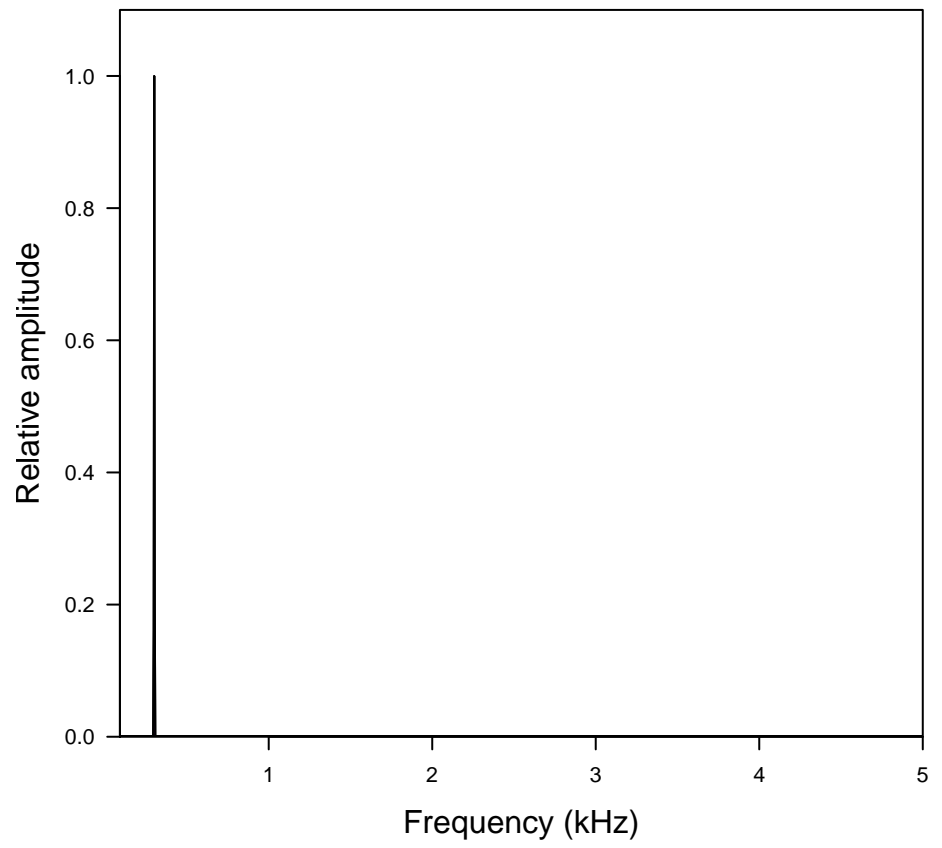

Vel. = 0.028 ; Str. = Corolla ; Axis = z ; Fl. accession = 10-s-77-12

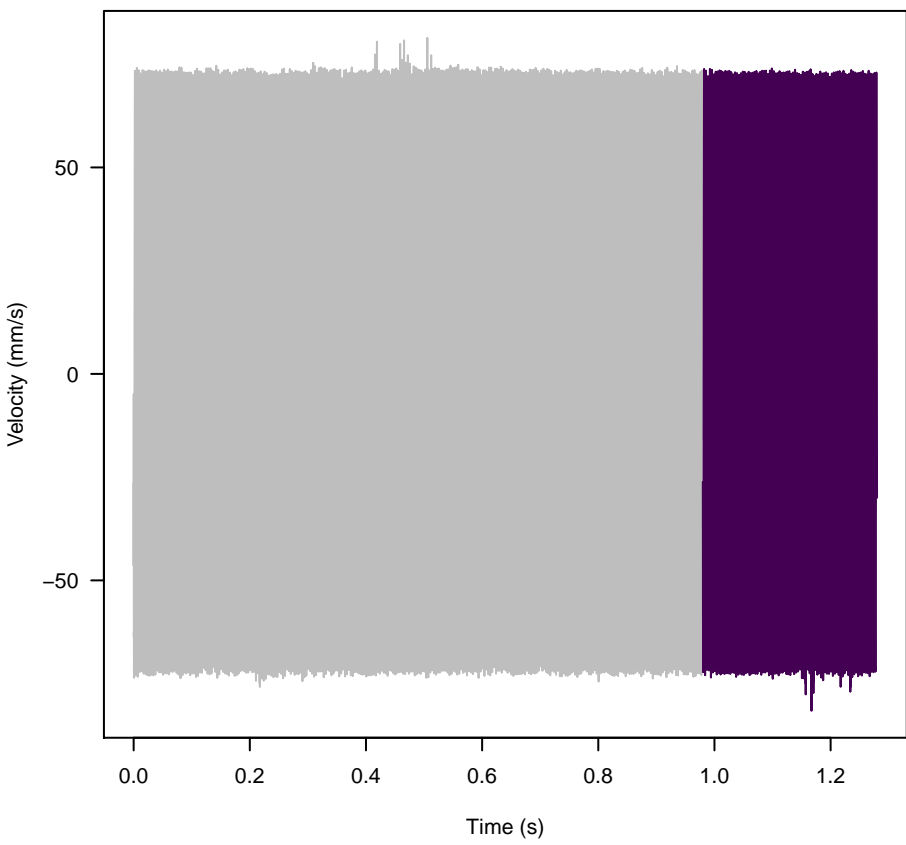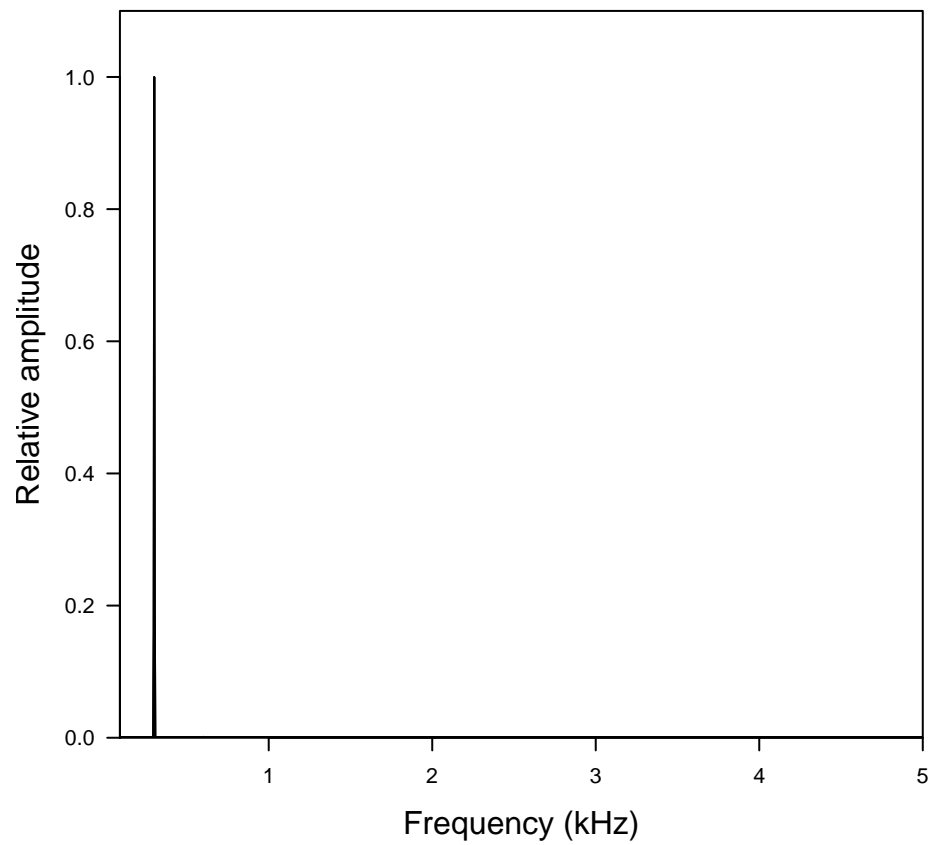

Vel. = 0.028 ; Str. = Receptacle ; Axis = z ; Fl. accession = 10-s-77-12

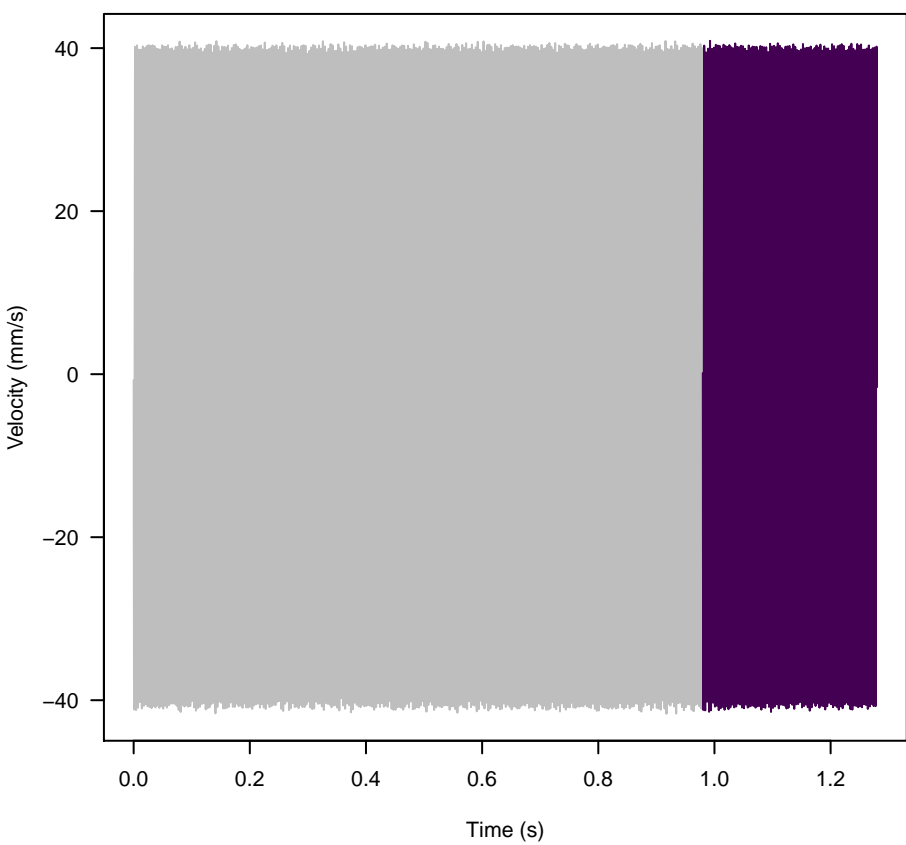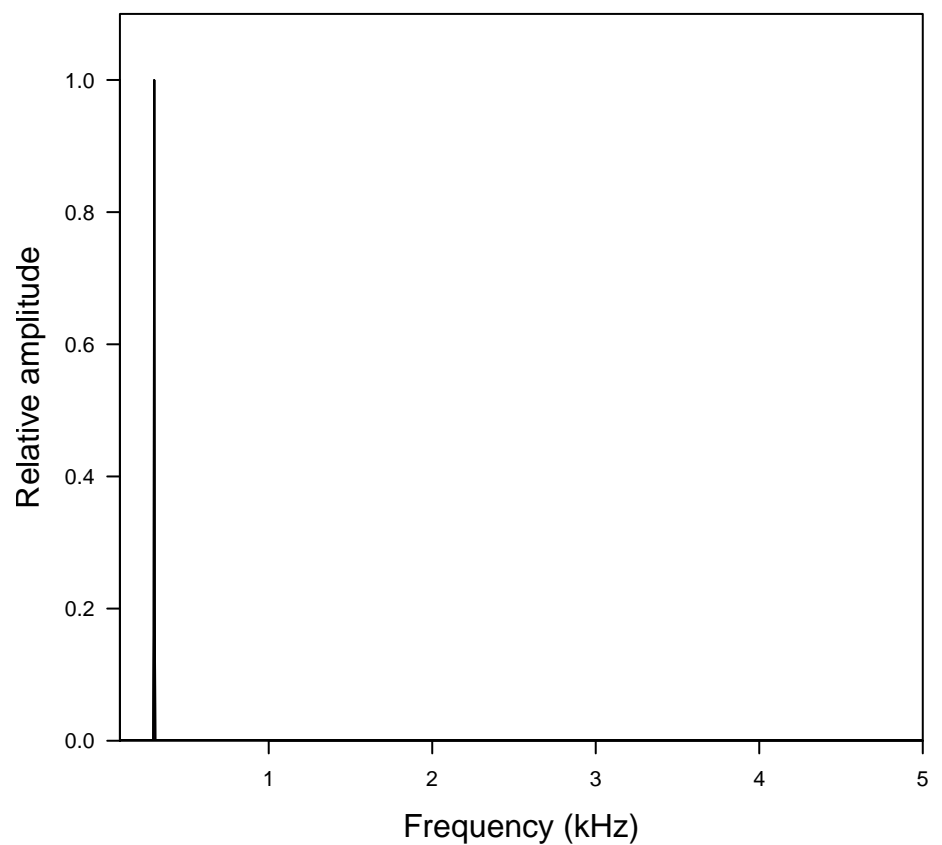

Vel. = 0.014 ; Str. = Corolla ; Axis = z ; Fl. accession = 10-s-77-12

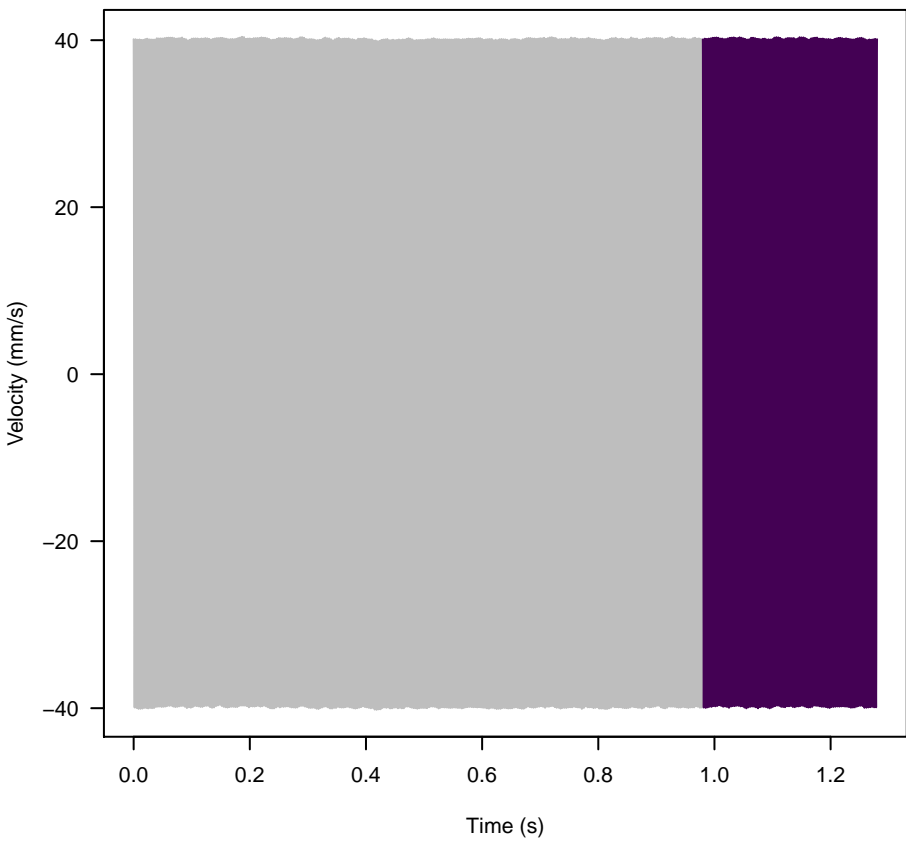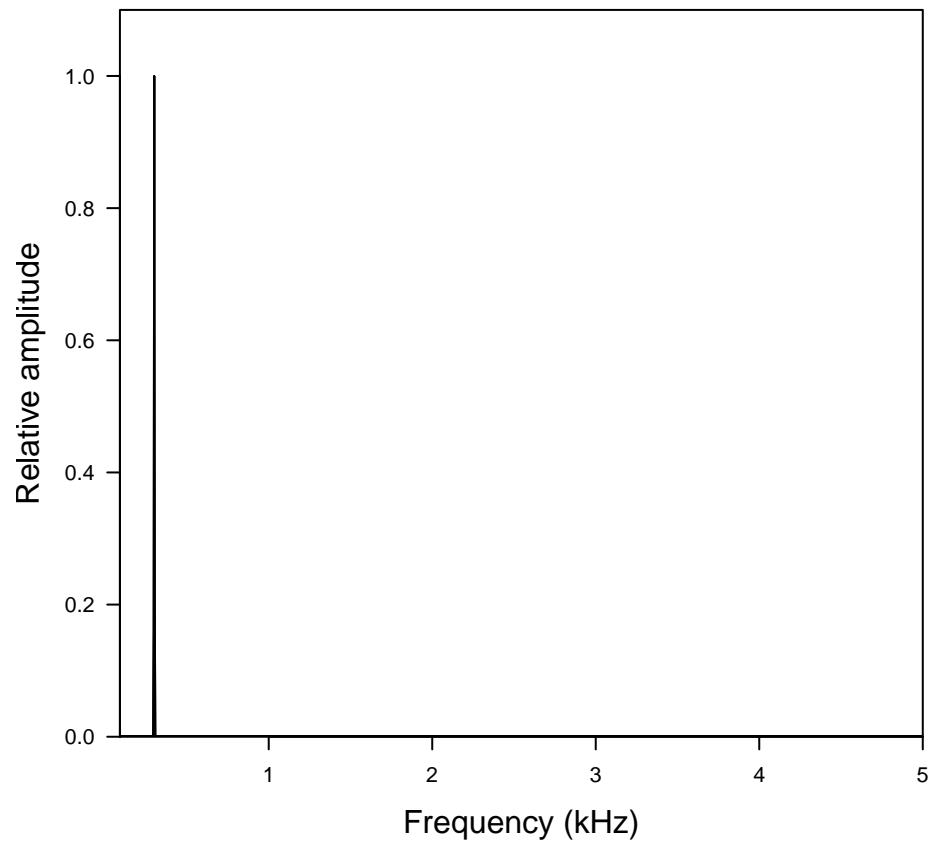

Vel. = 0.014 ; Str. = Receptacle ; Axis = z ; Fl. accession = 10-s-77-12

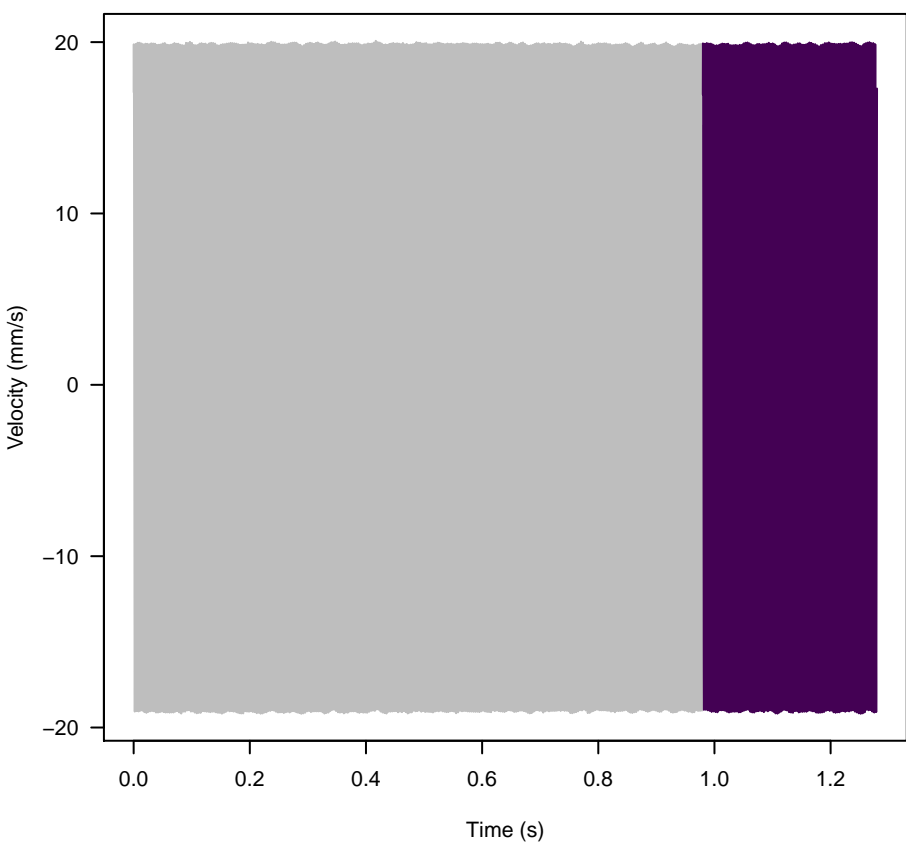

Vel. = 0.014 ; Str. = FA ; Axis = z ; Fl. accession = 10-s-77-12

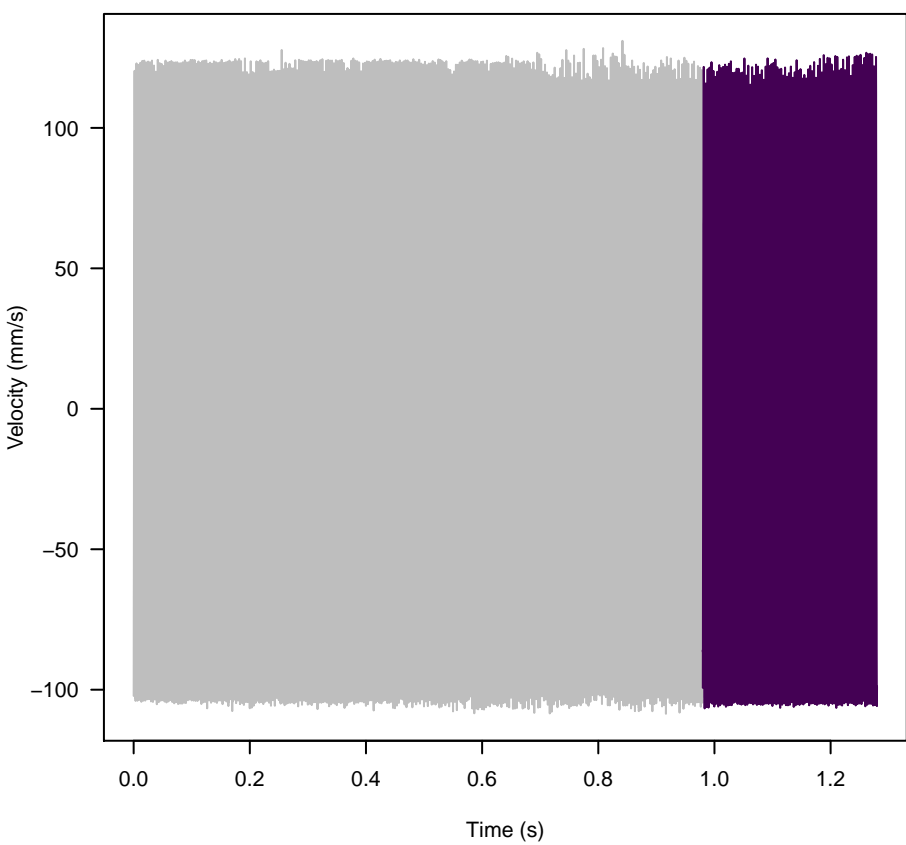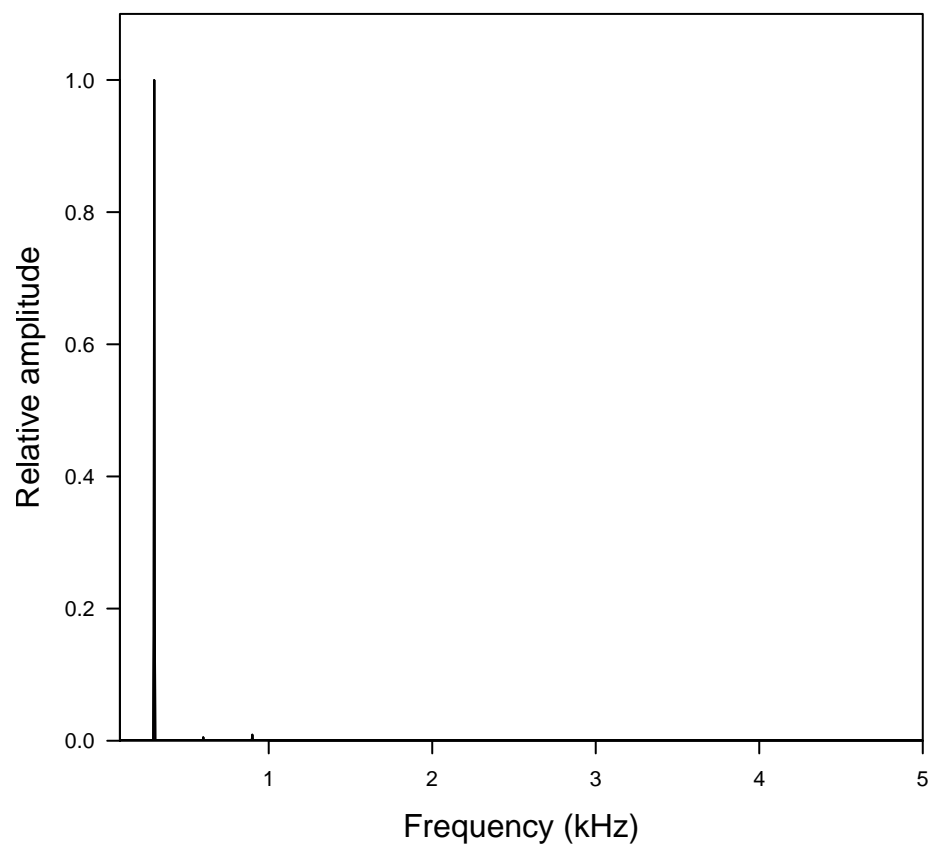

Vel. = 0.014 ; Str. = Receptacle ; Axis = z ; Fl. accession = 10-s-77-12

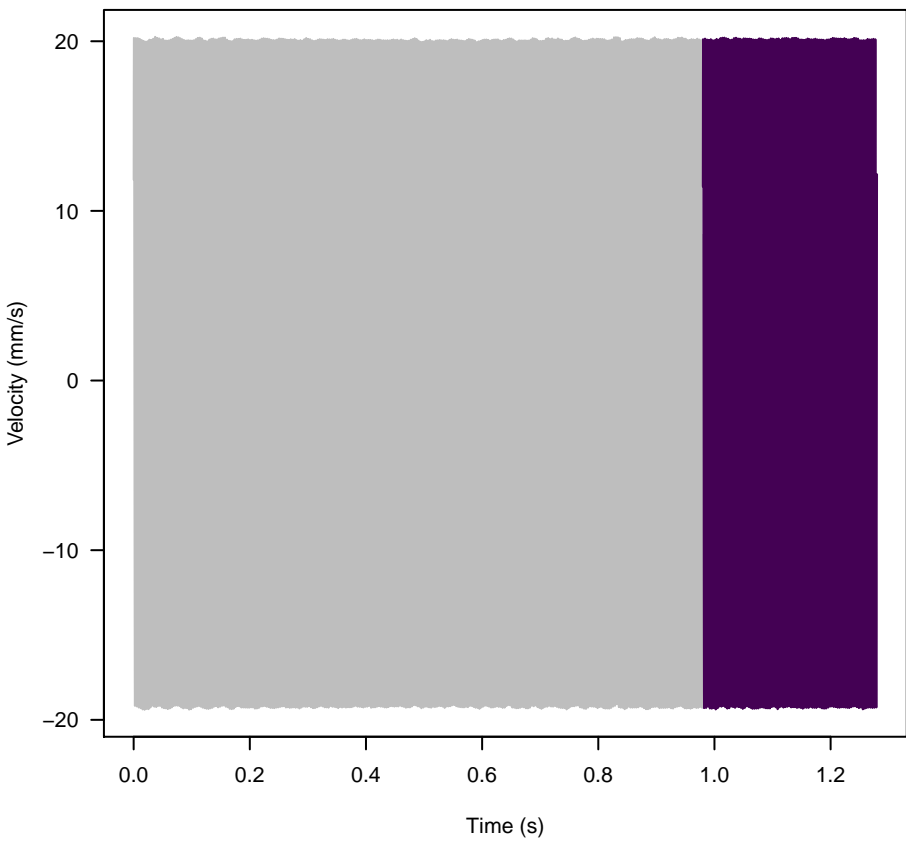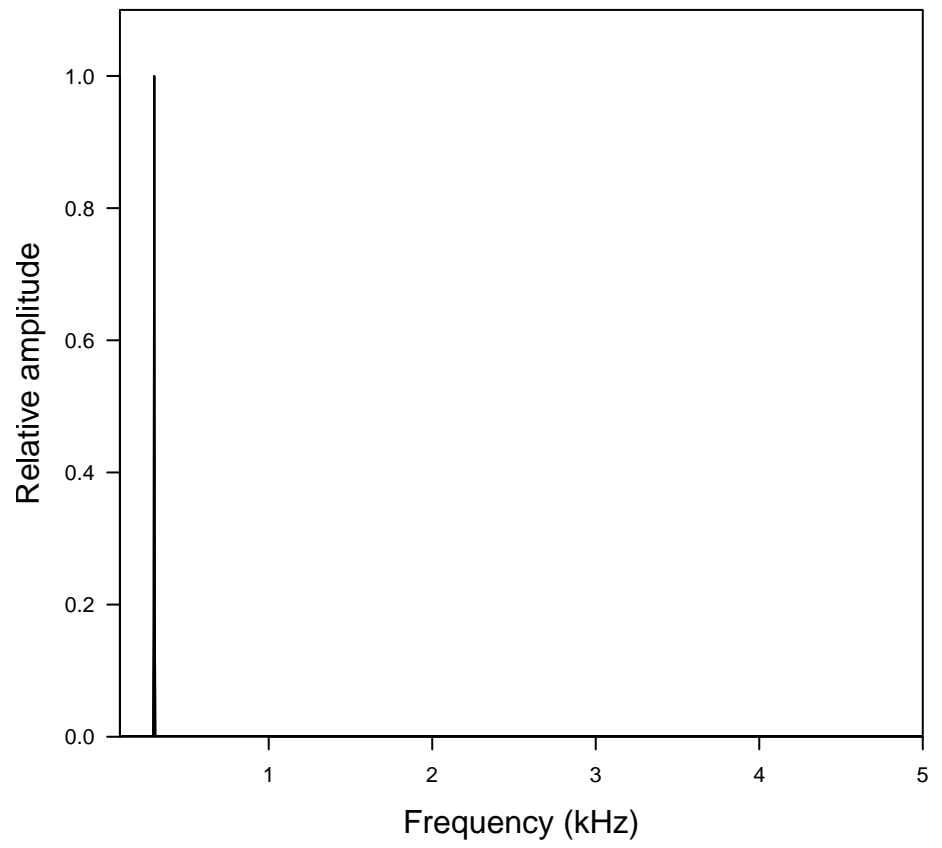

Vel. = 0.014 ; Str. = PA ; Axis = z ; Fl. accession = 10-s-77-12

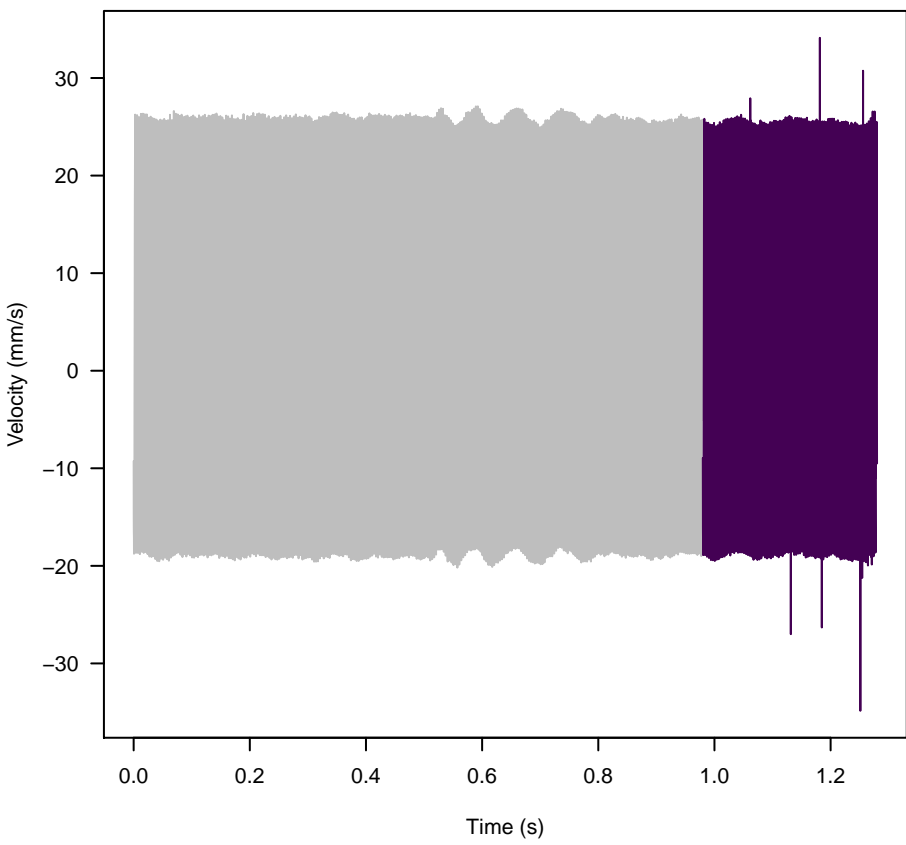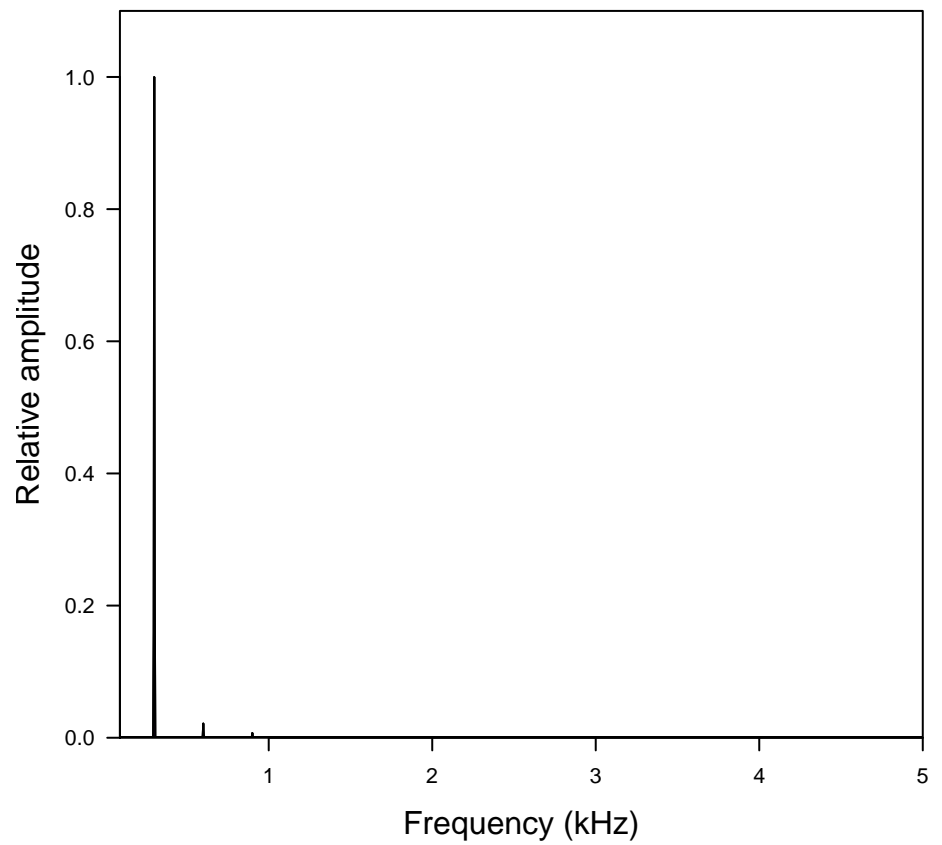

Vel. = 0.014 ; Str. = Receptacle ; Axis = z ; Fl. accession = 10-s-77-12

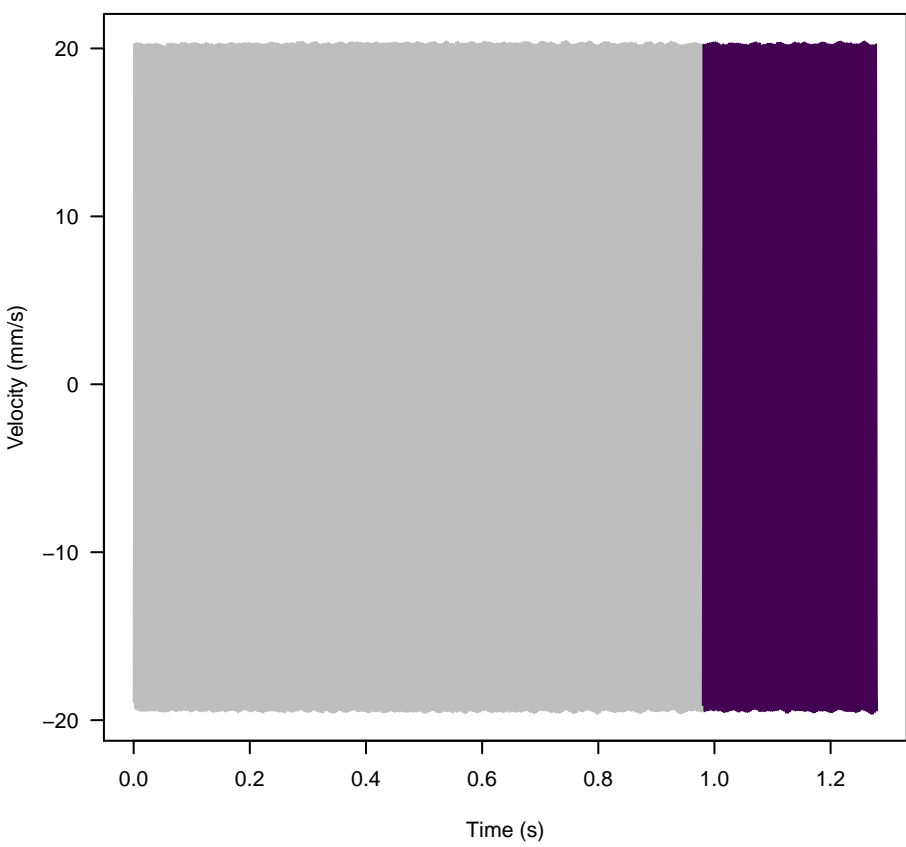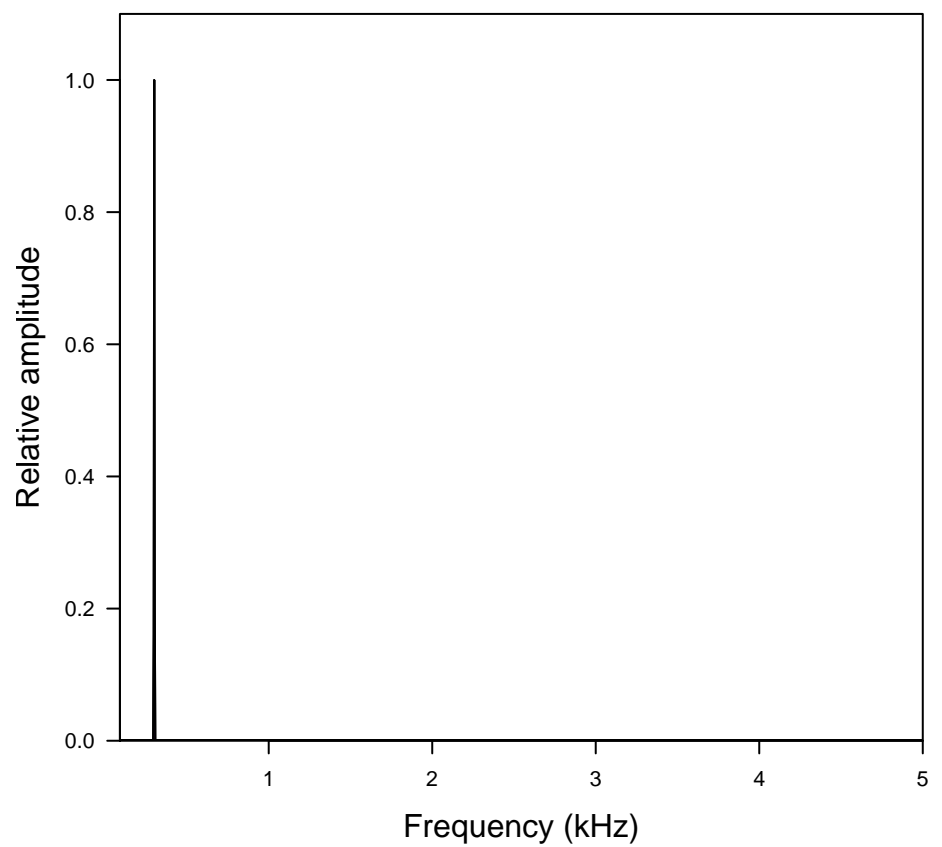

Vel. = 0.014 ; Str. = Corolla ; Axis = y ; Fl. accession = 10-s-77-12

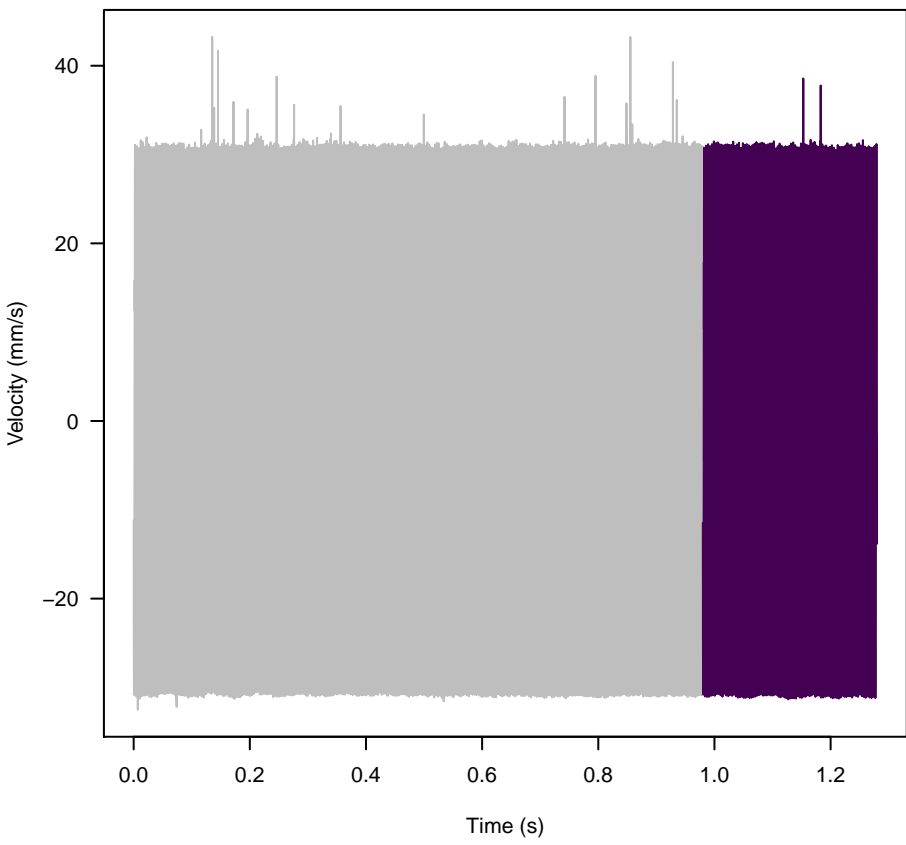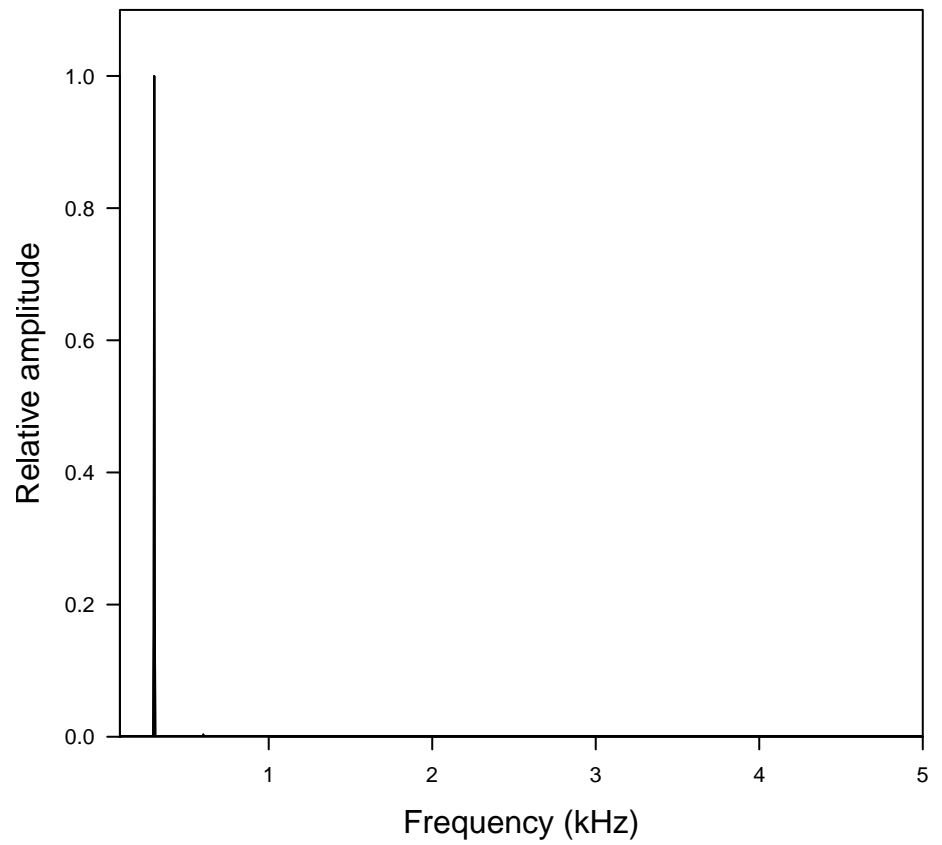

Vel. = 0.014 ; Str. = Receptacle ; Axis = y ; Fl. accession = 10-s-77-12

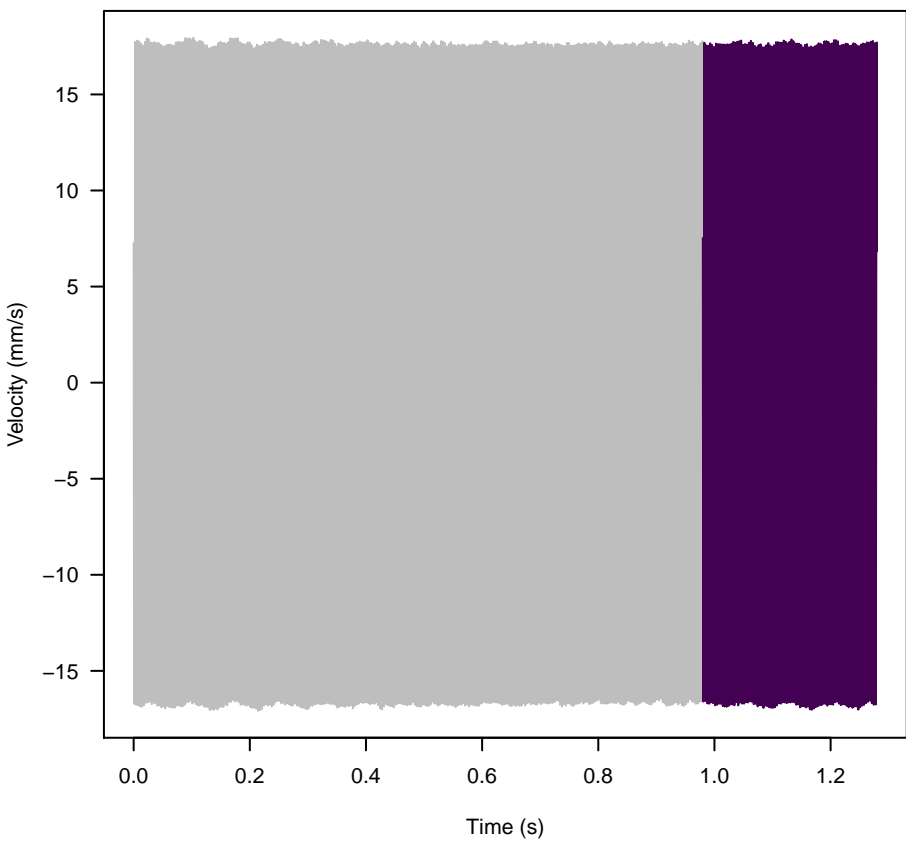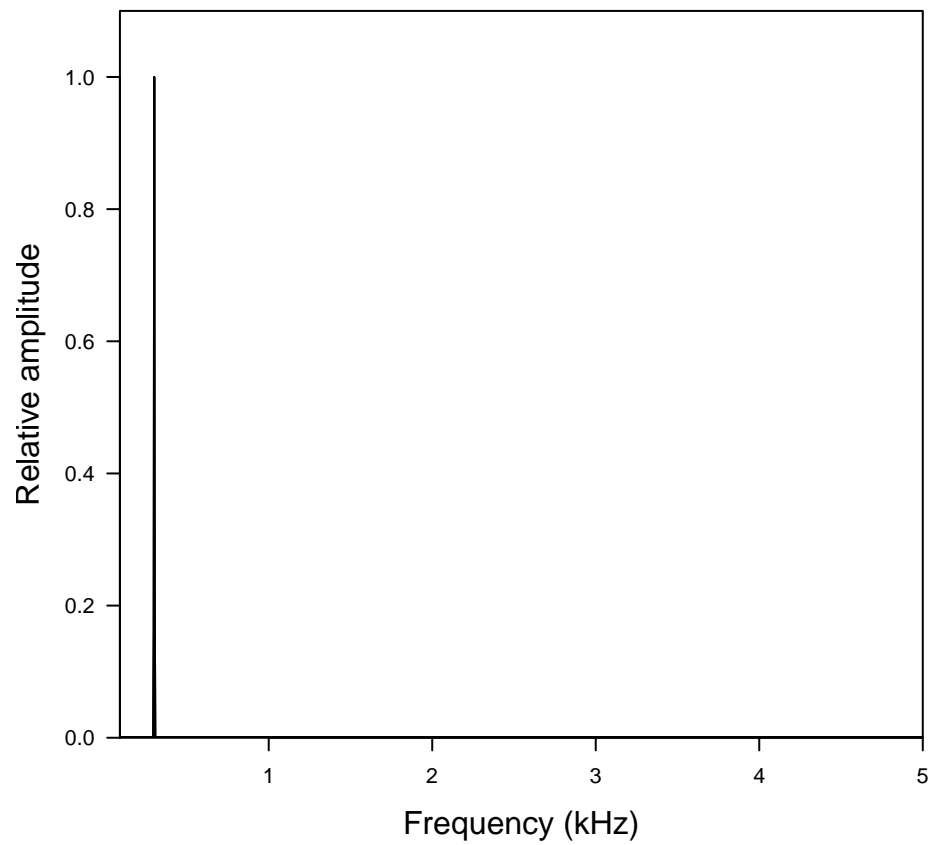

Vel. = 0.014 ; Str. = FA ; Axis = y ; Fl. accession = 10-s-77-12

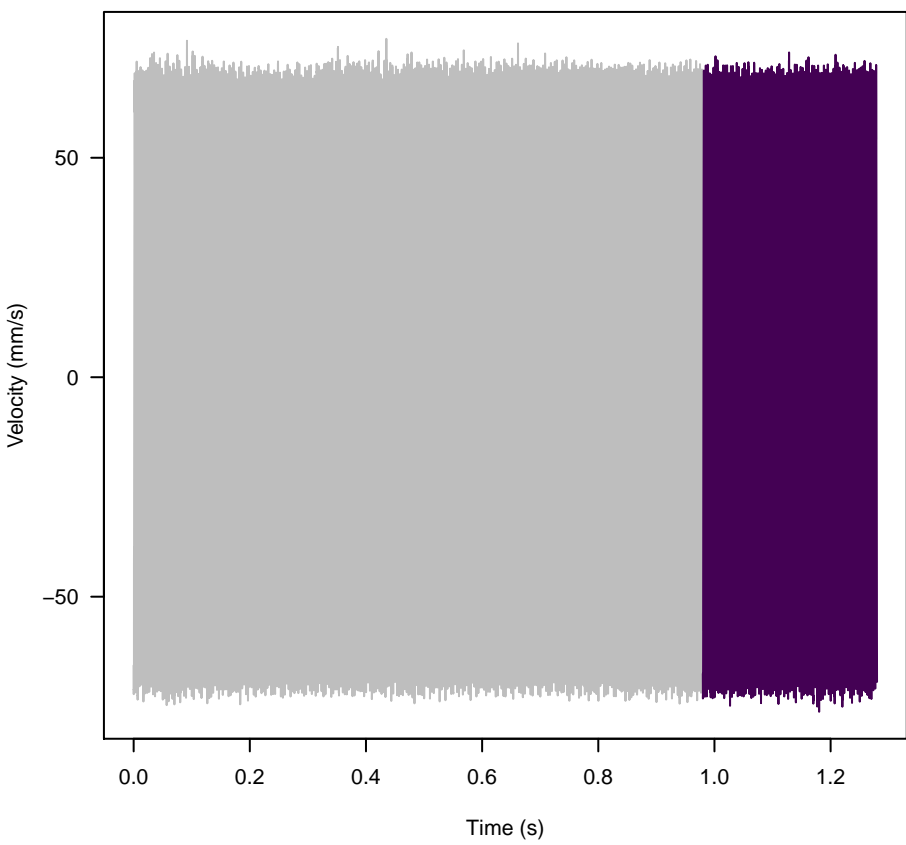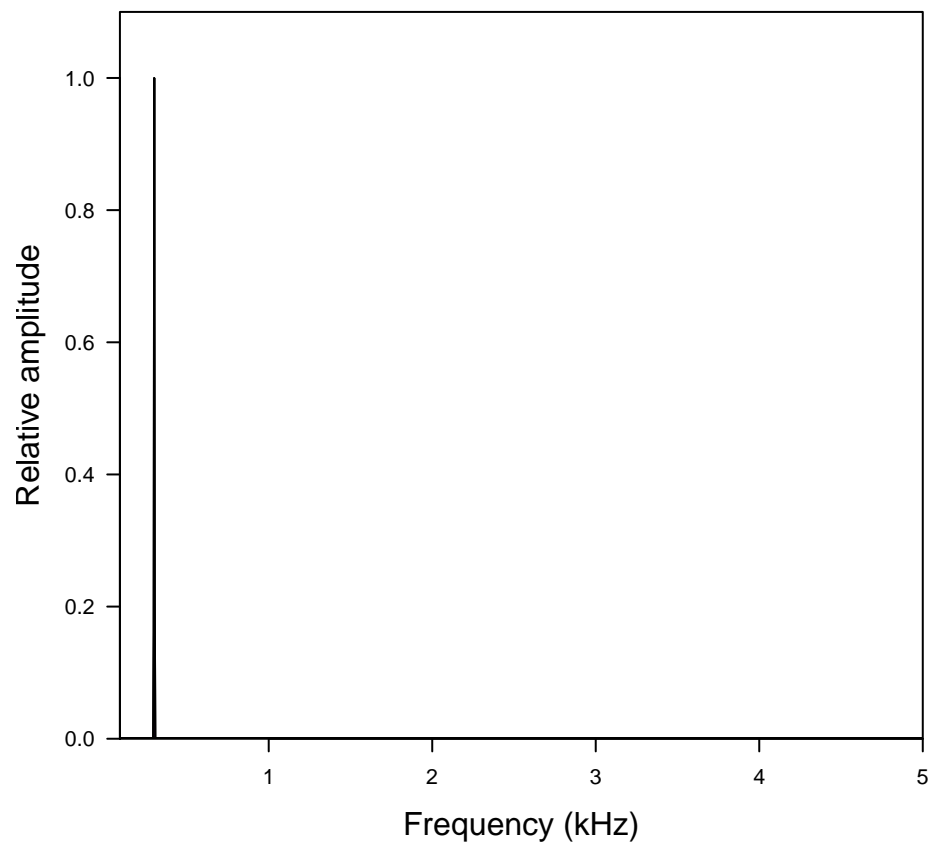

Vel. = 0.014 ; Str. = Receptacle ; Axis = y ; Fl. accession = 10-s-77-12

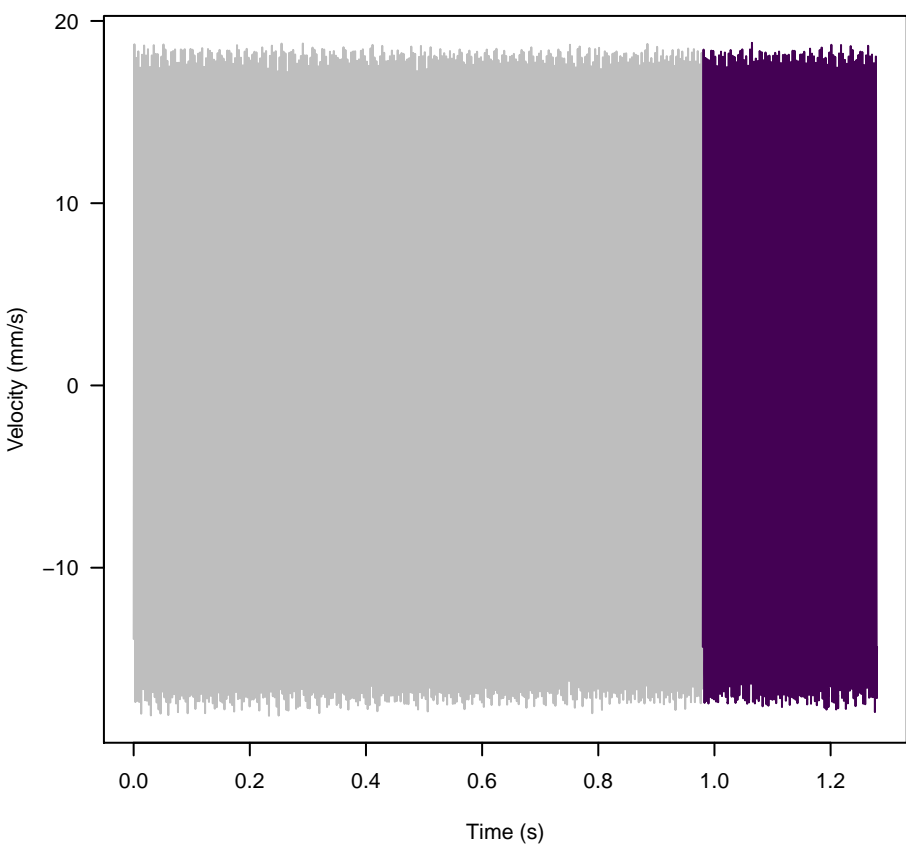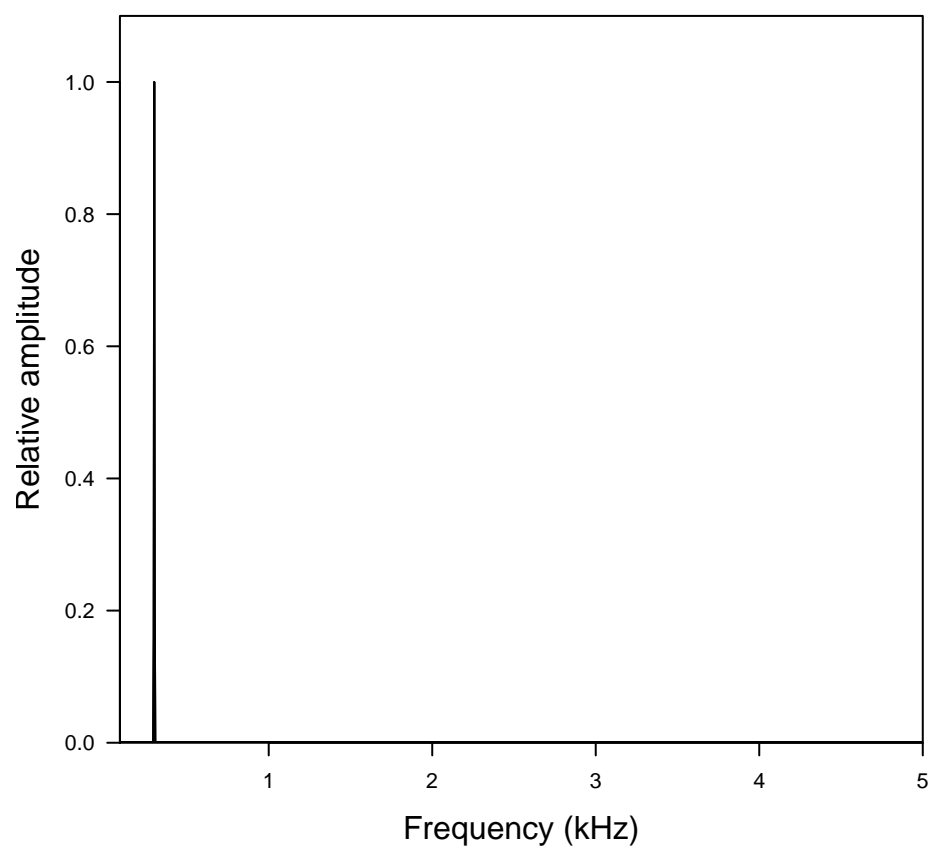

Vel. = 0.014 ; Str. = PA ; Axis = y ; Fl. accession = 10-s-77-12

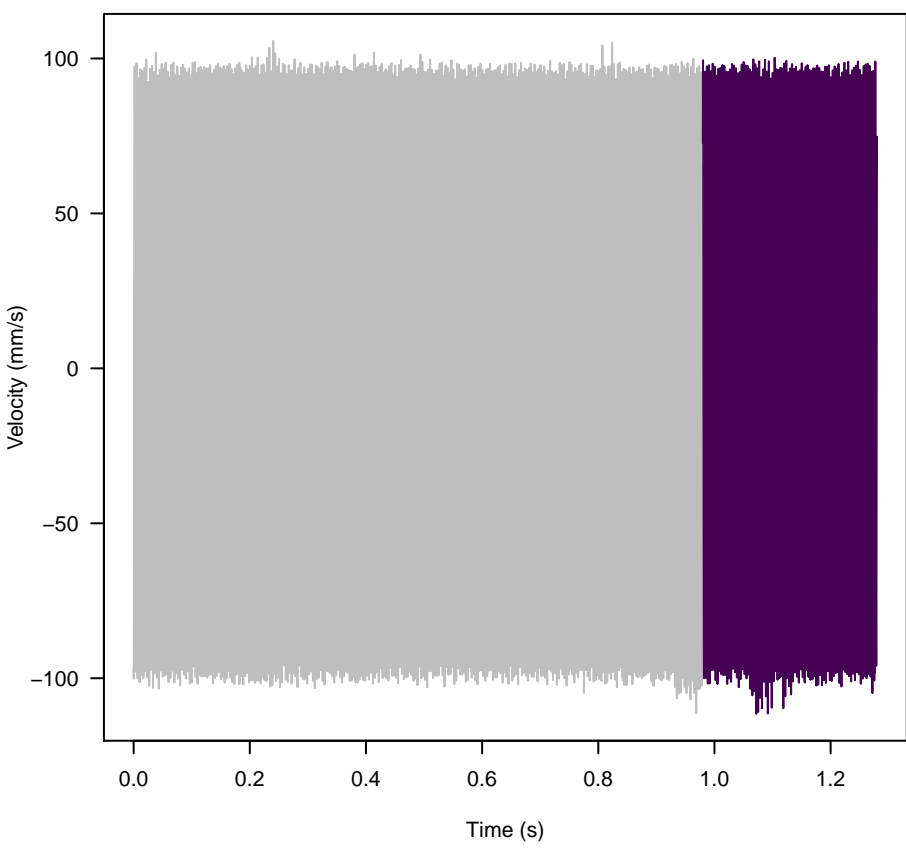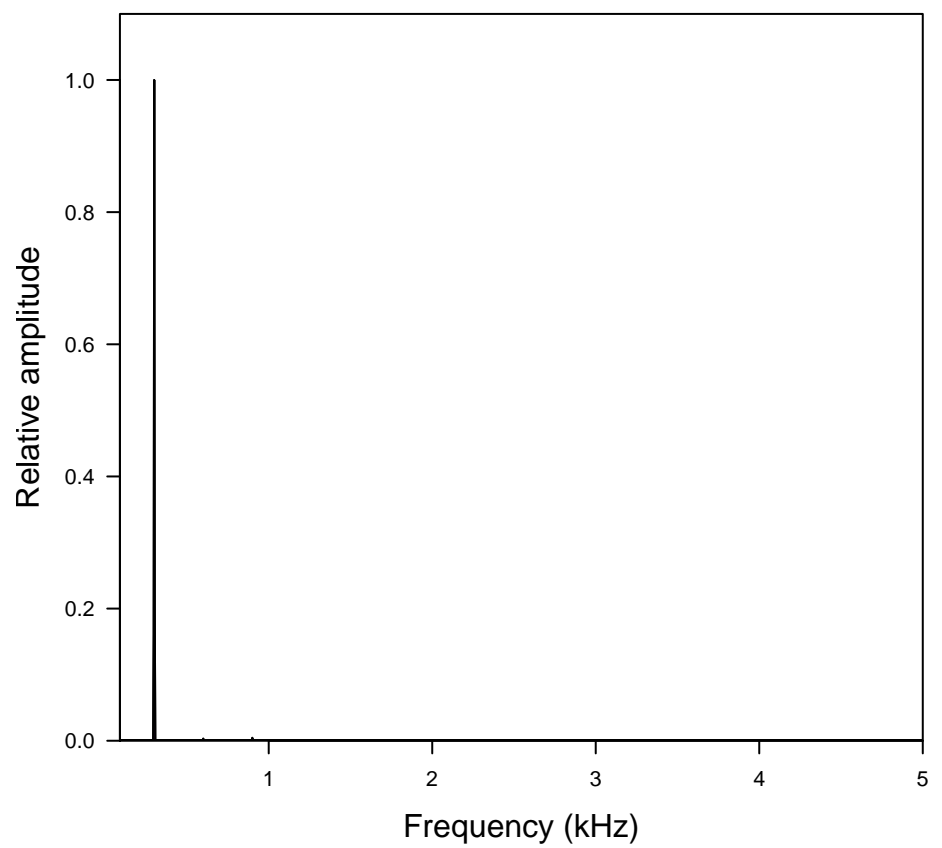

Vel. = 0.014 ; Str. = Receptacle ; Axis = y ; Fl. accession = 10-s-77-12

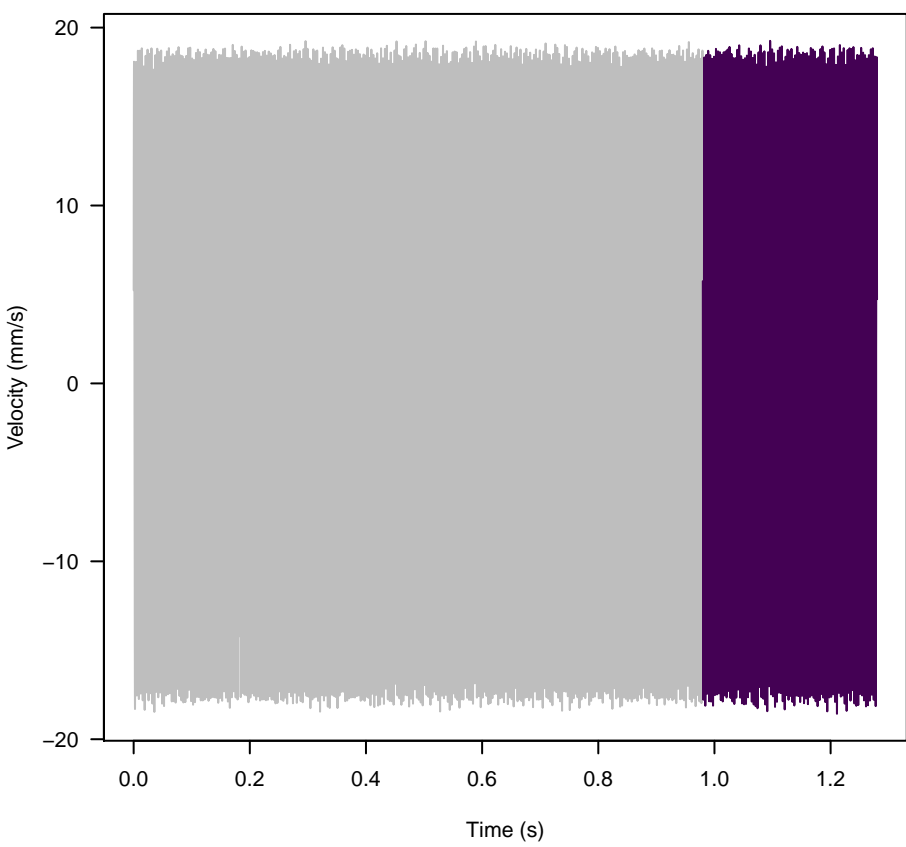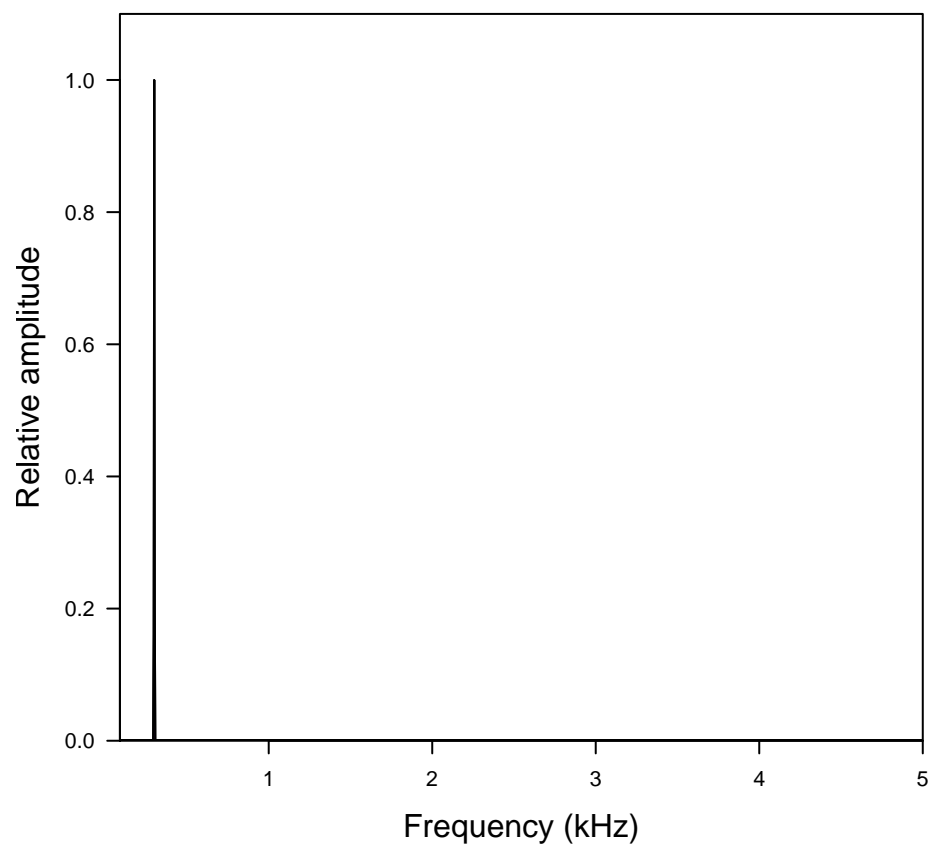

Vel. = 0.028 ; Str. = PA ; Axis = y ; Fl. accession = 10-s-77-12

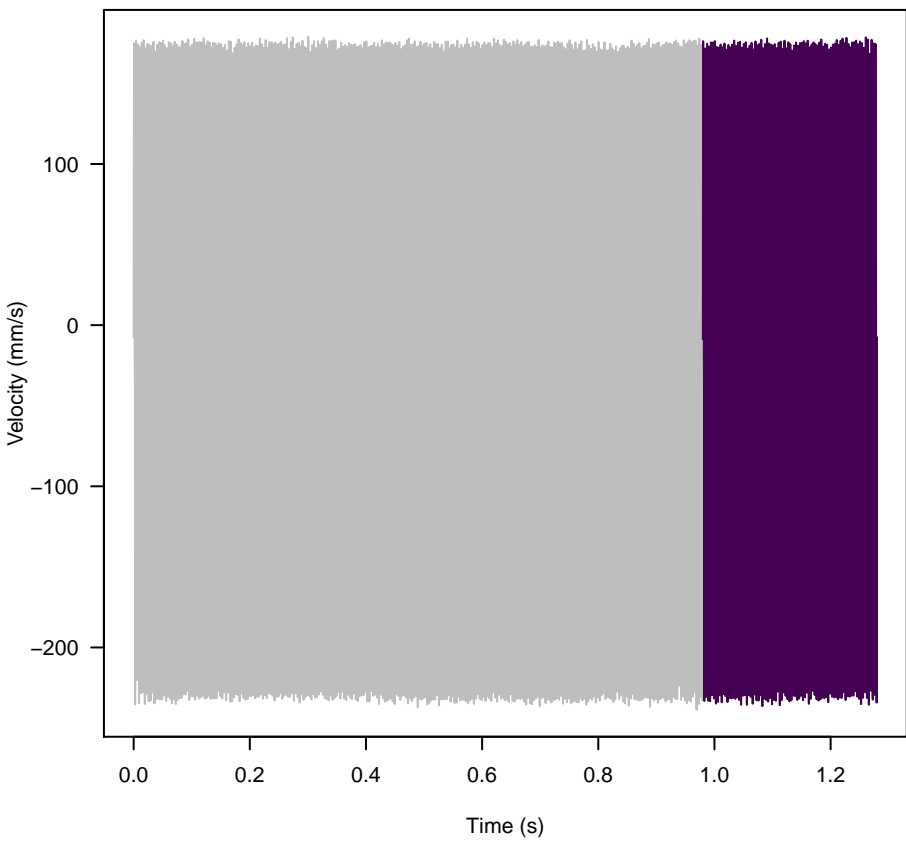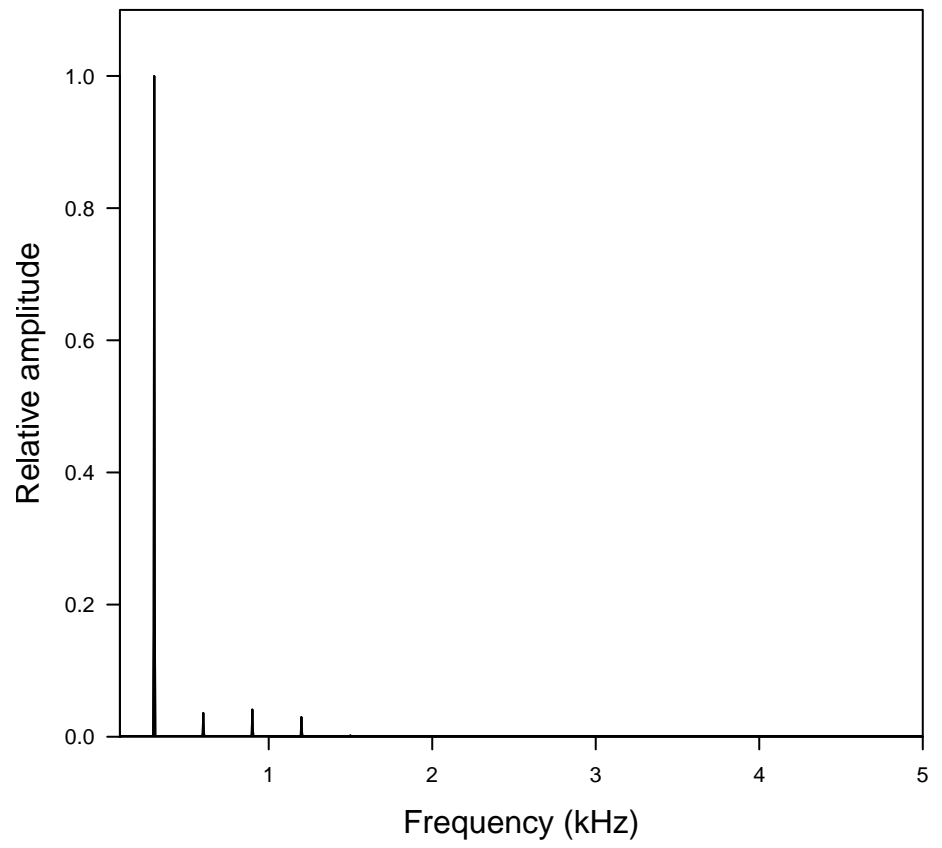

Vel. = 0.028 ; Str. = Receptacle ; Axis = y ; Fl. accession = 10-s-77-12

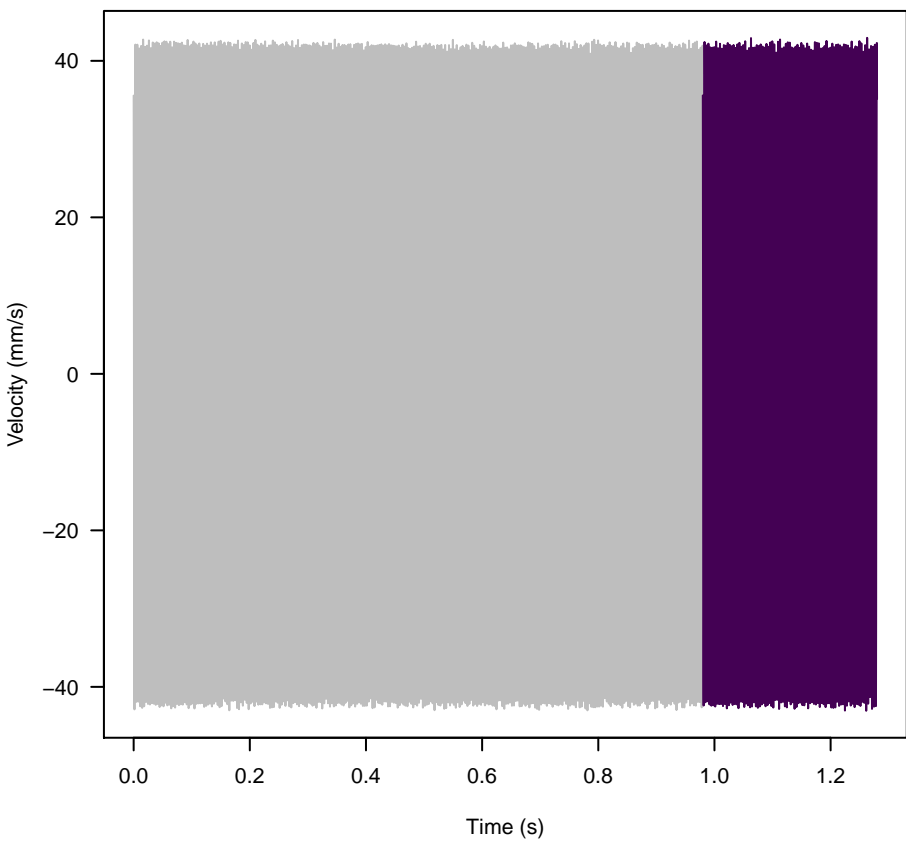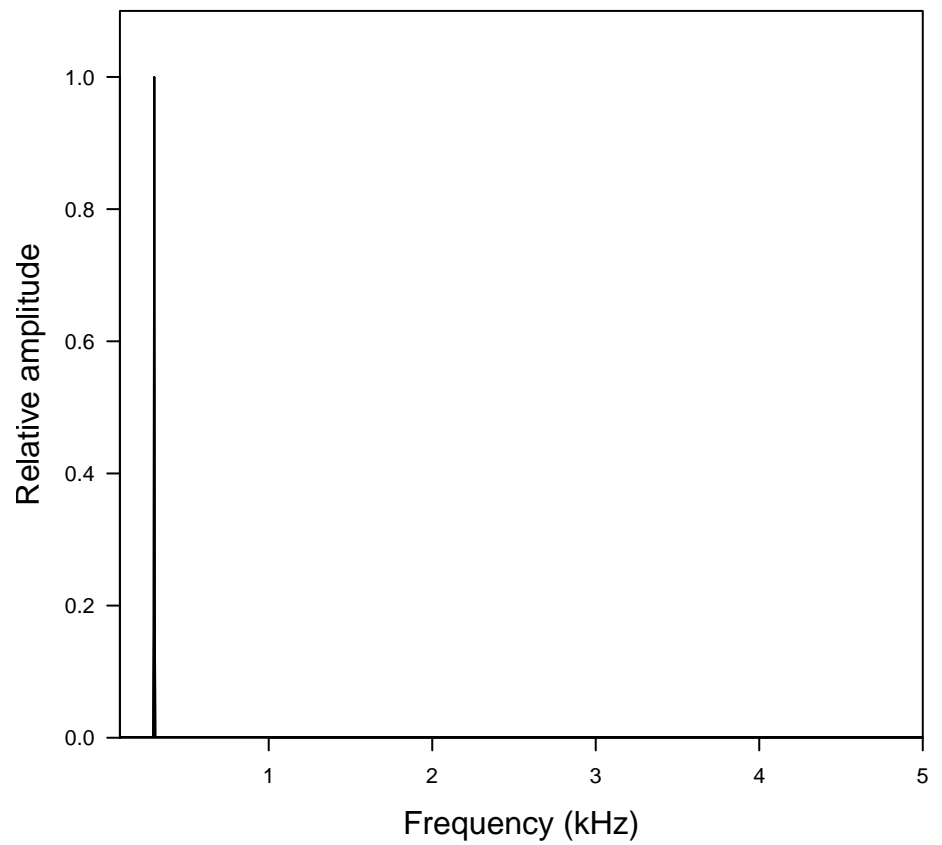

Vel. = 0.028 ; Str. = FA ; Axis = y ; Fl. accession = 10-s-77-12

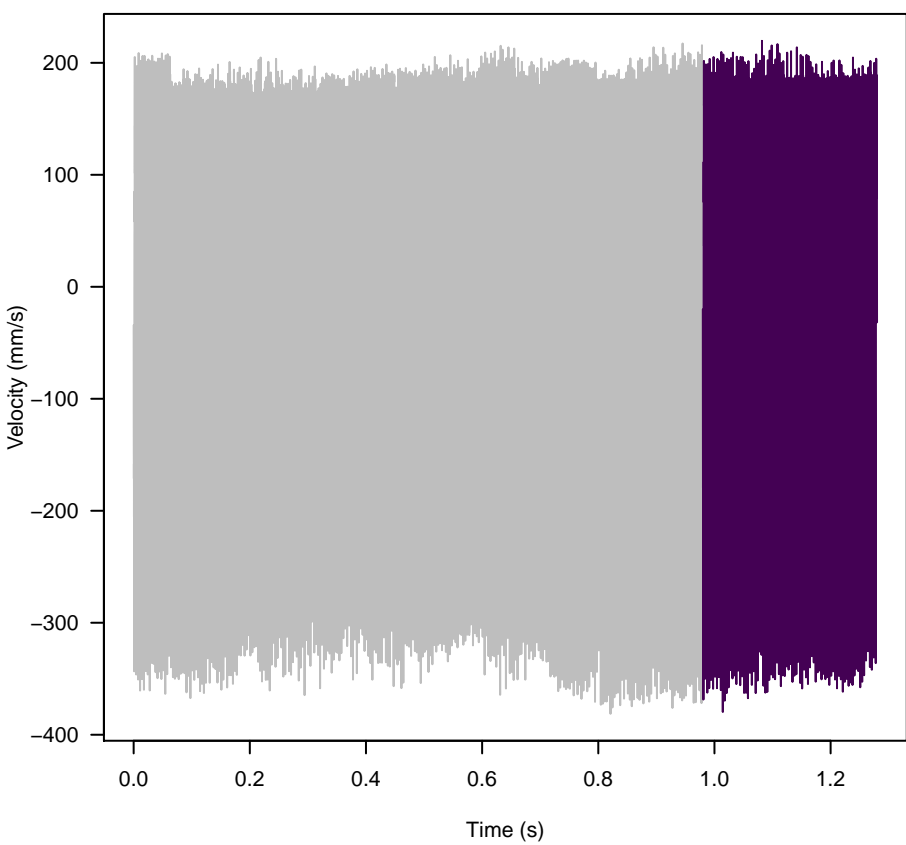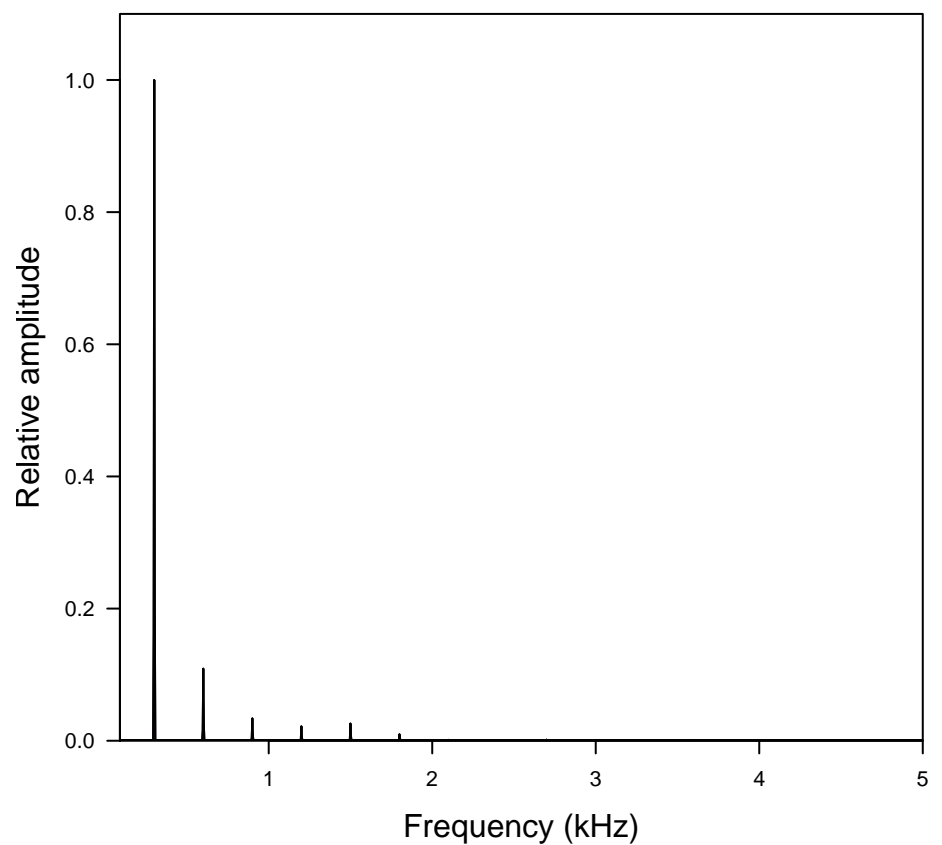

Vel. = 0.028 ; Str. = Receptacle ; Axis = y ; Fl. accession = 10-s-77-12

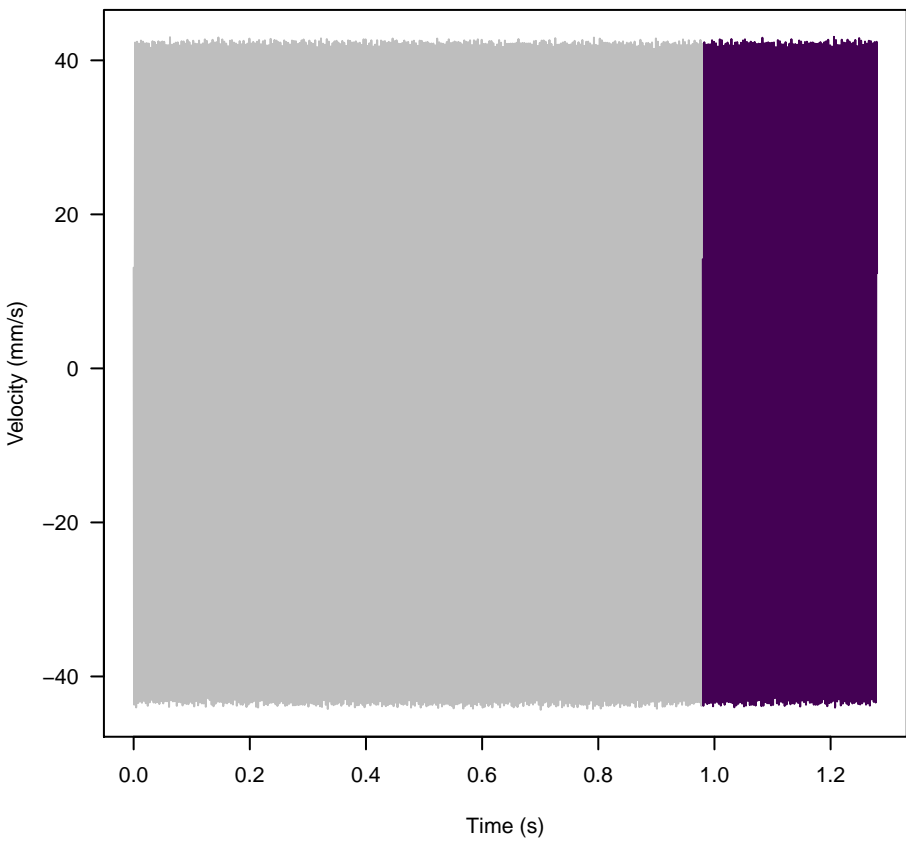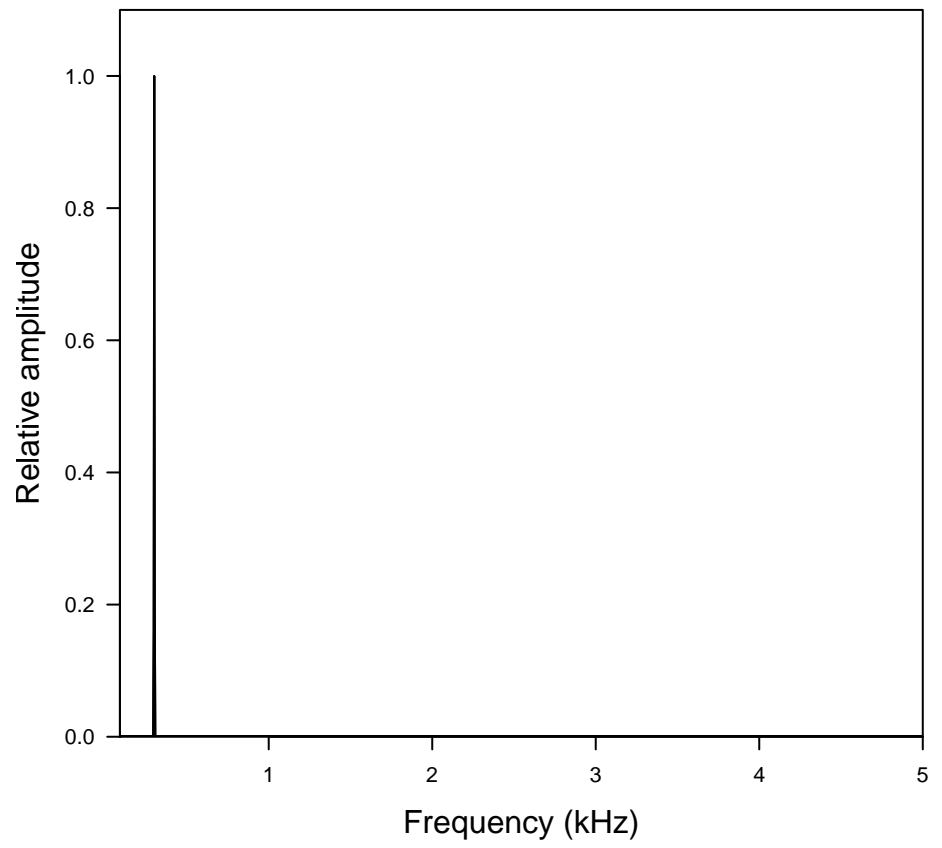

Vel. = 0.028 ; Str. = Corolla ; Axis = y ; Fl. accession = 10-s-77-12

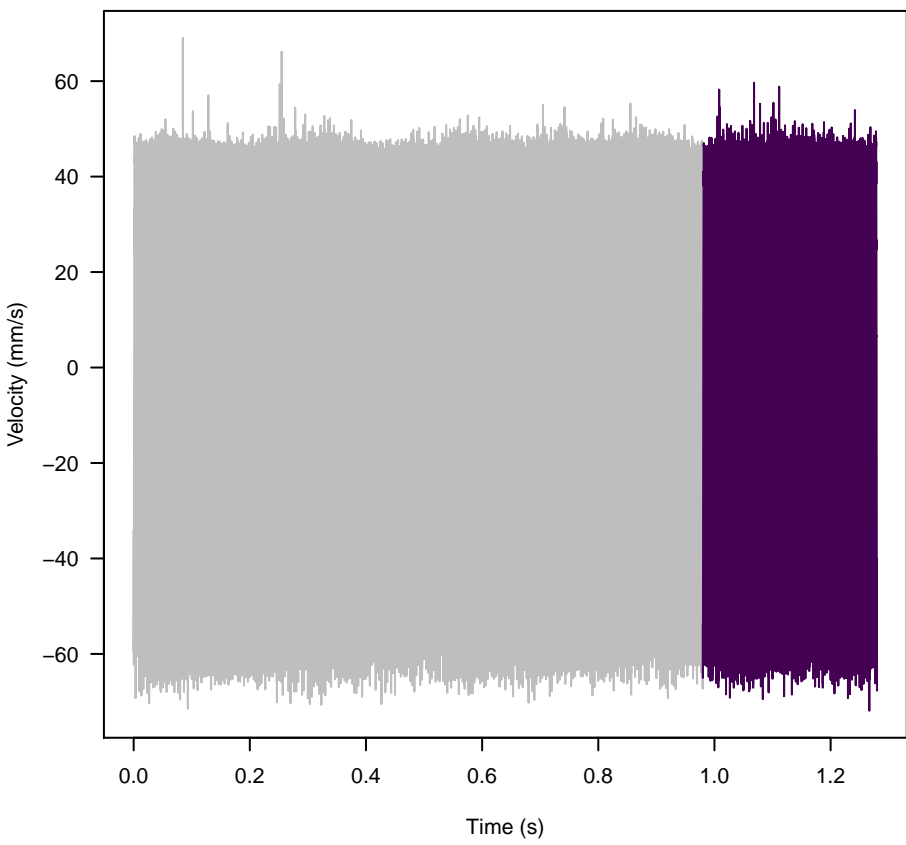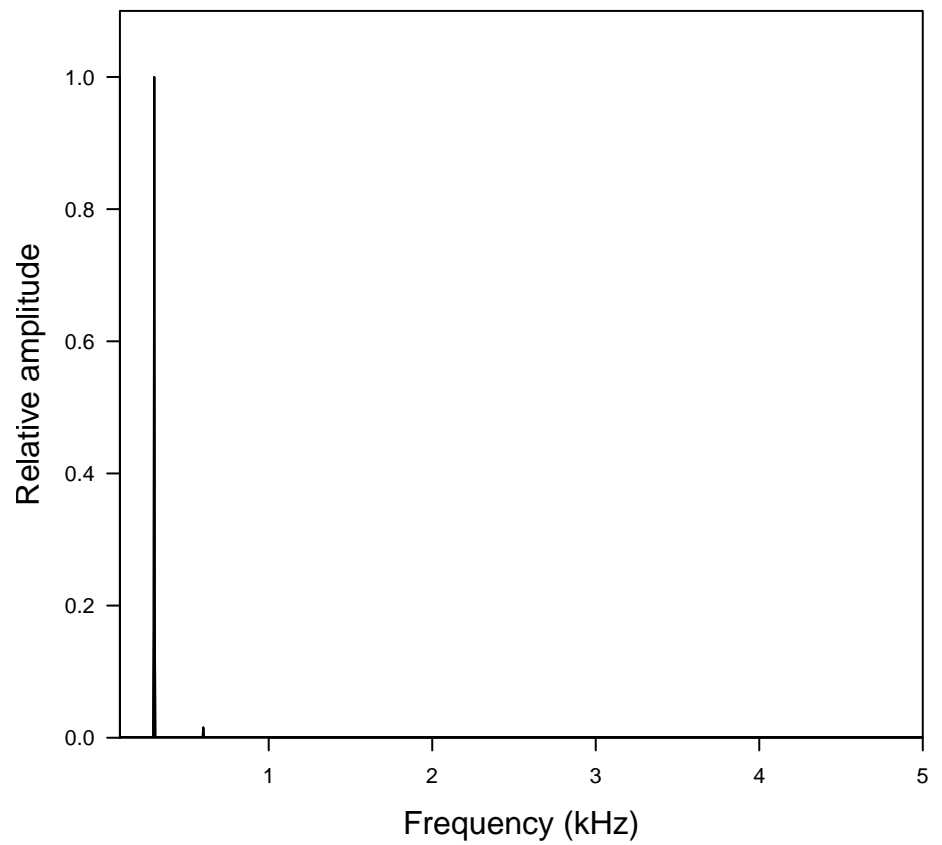

Vel. = 0.028 ; Str. = Receptacle ; Axis = y ; Fl. accession = 10-s-77-12

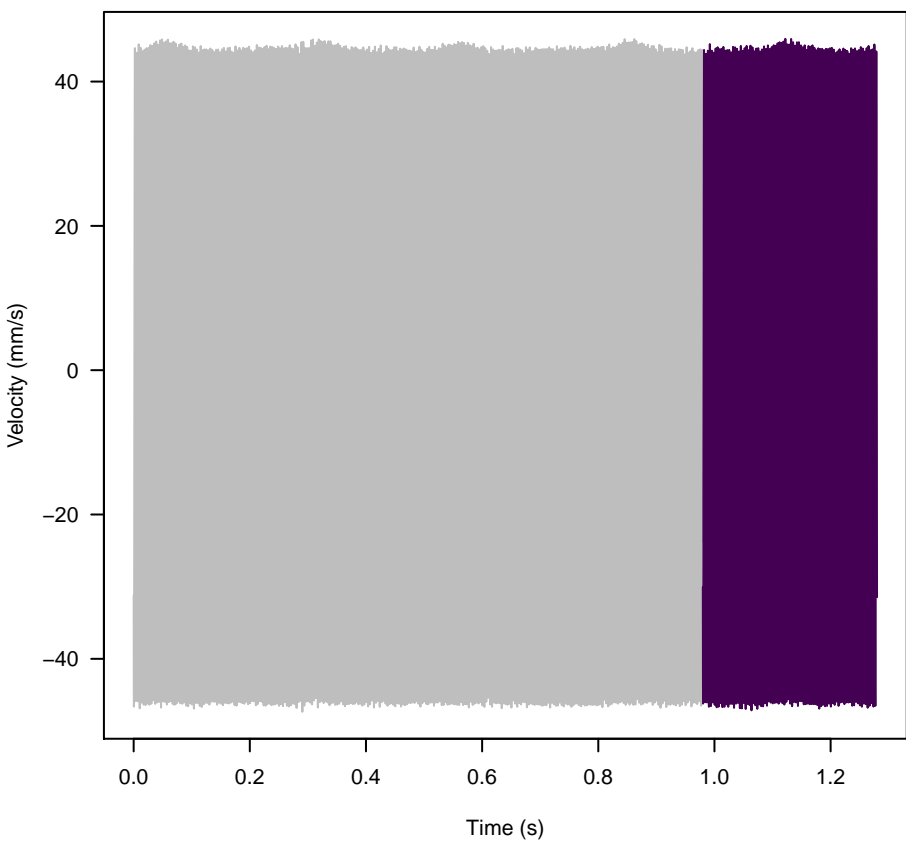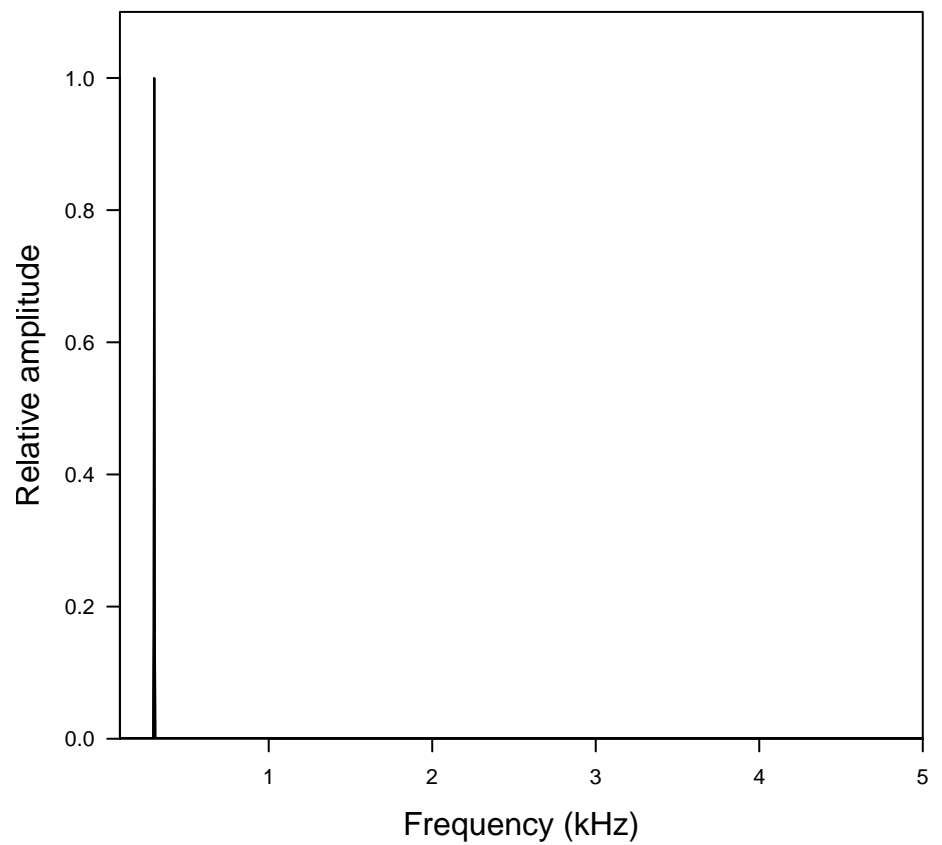



Vel. = 0.057 ; Str. = Corolla ; Axis = y ; Fl. accession = 10-s-77-12

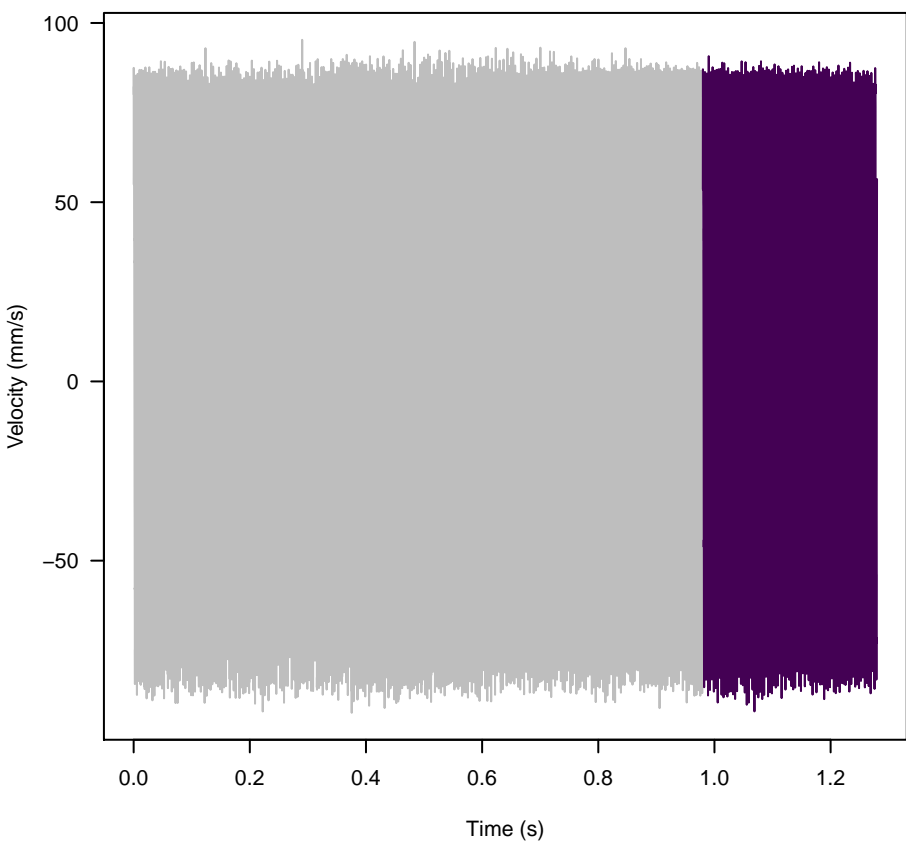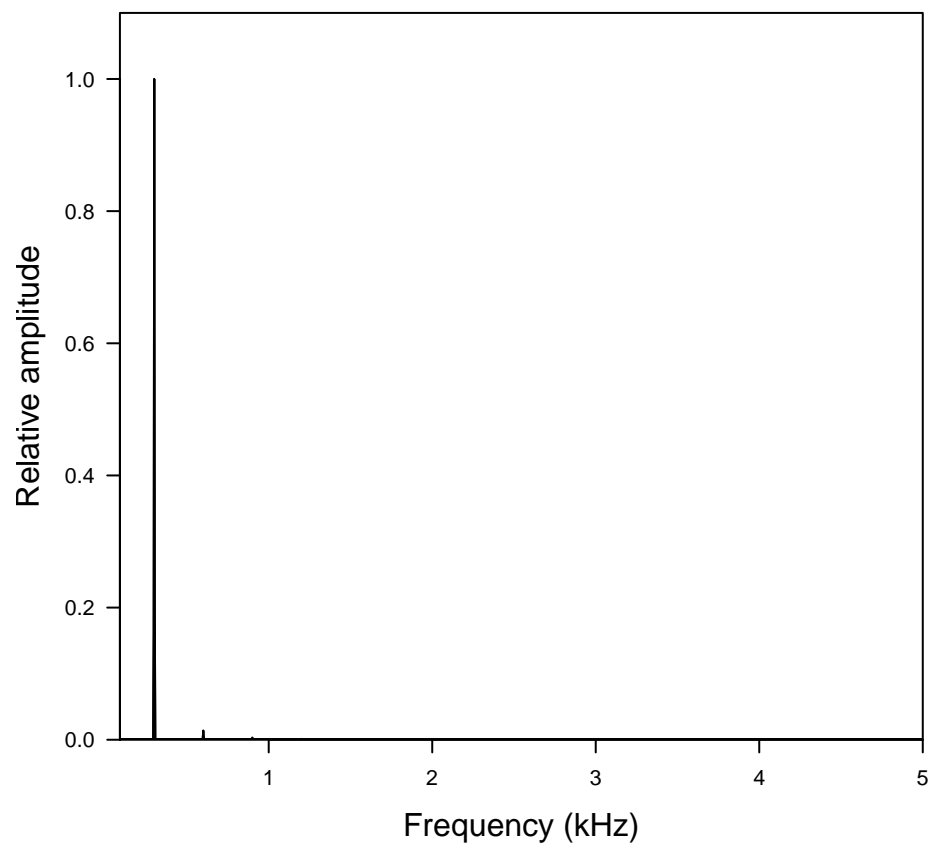

Vel. = 0.057 ; Str. = Receptacle ; Axis = y ; Fl. accession = 10-s-77-12

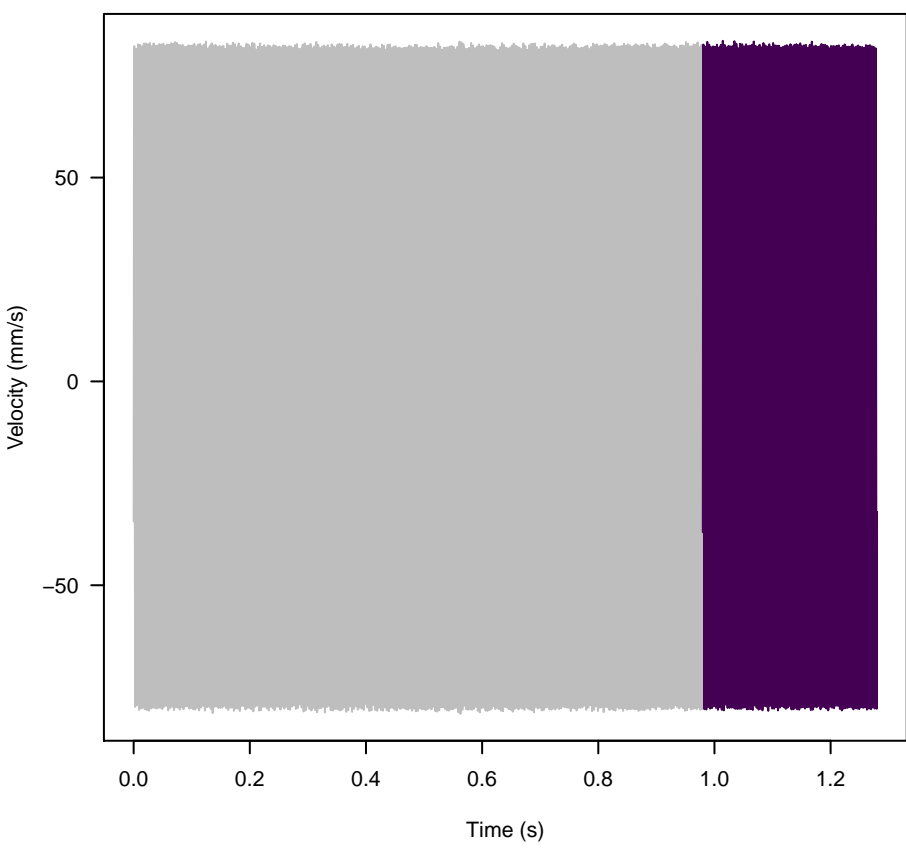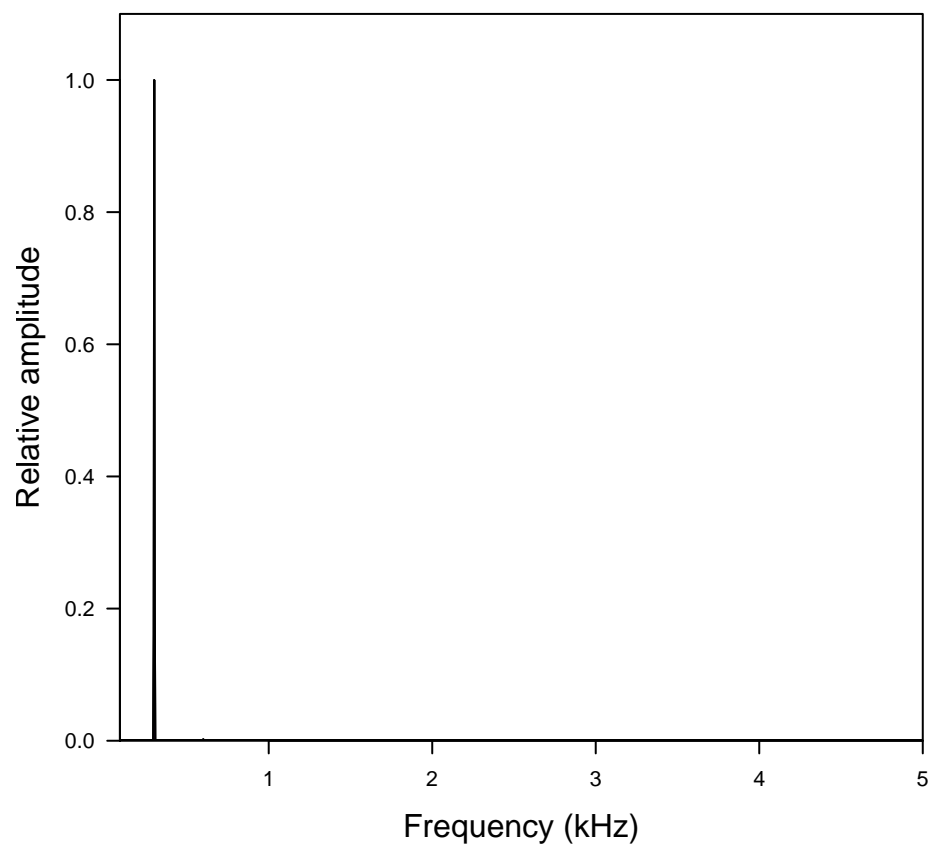

Vel. = 0.057 ; Str. = FA ; Axis = y ; Fl. accession = 10-s-77-12

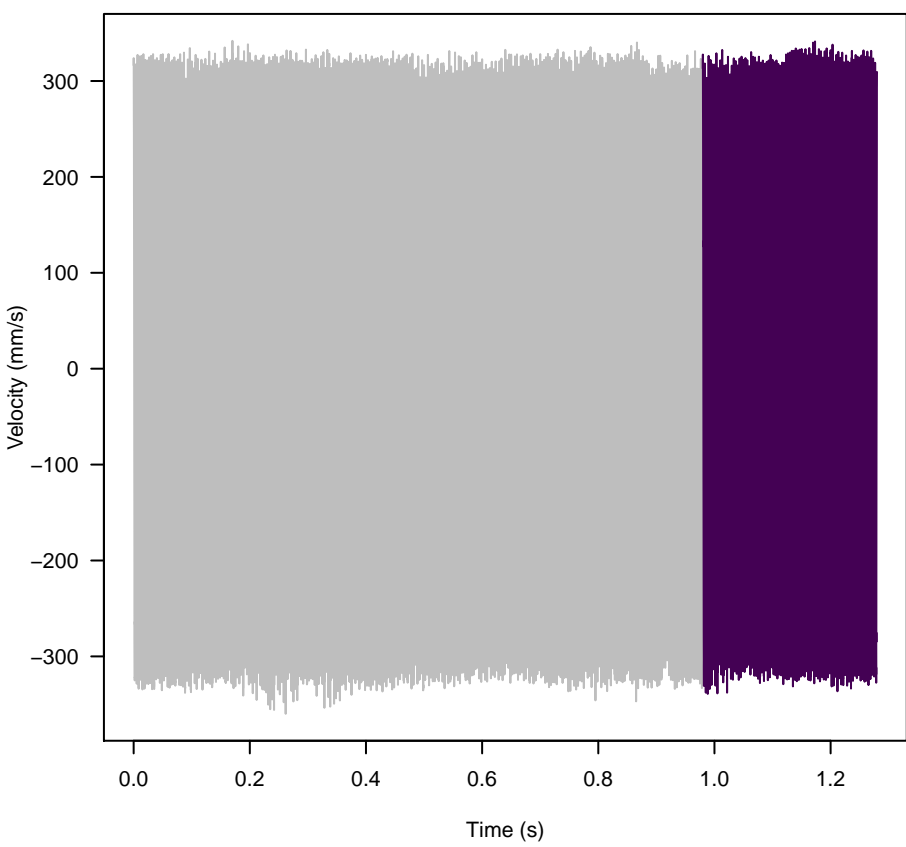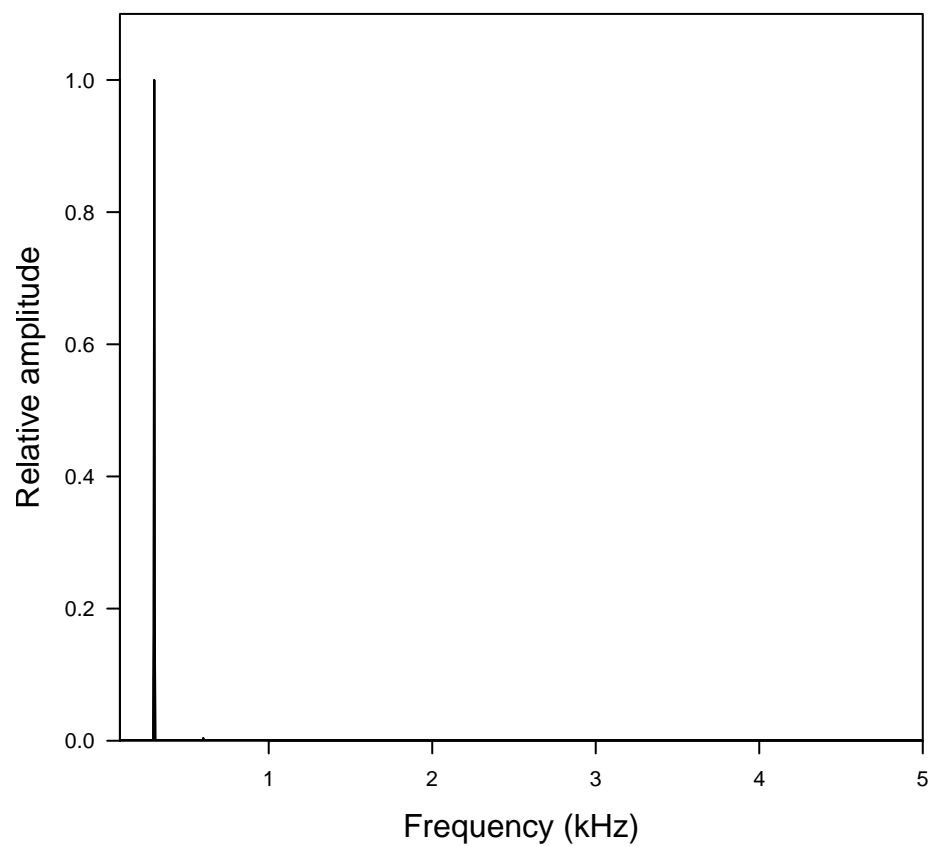

Vel. = 0.057 ; Str. = Receptacle ; Axis = y ; Fl. accession = 10-s-77-12

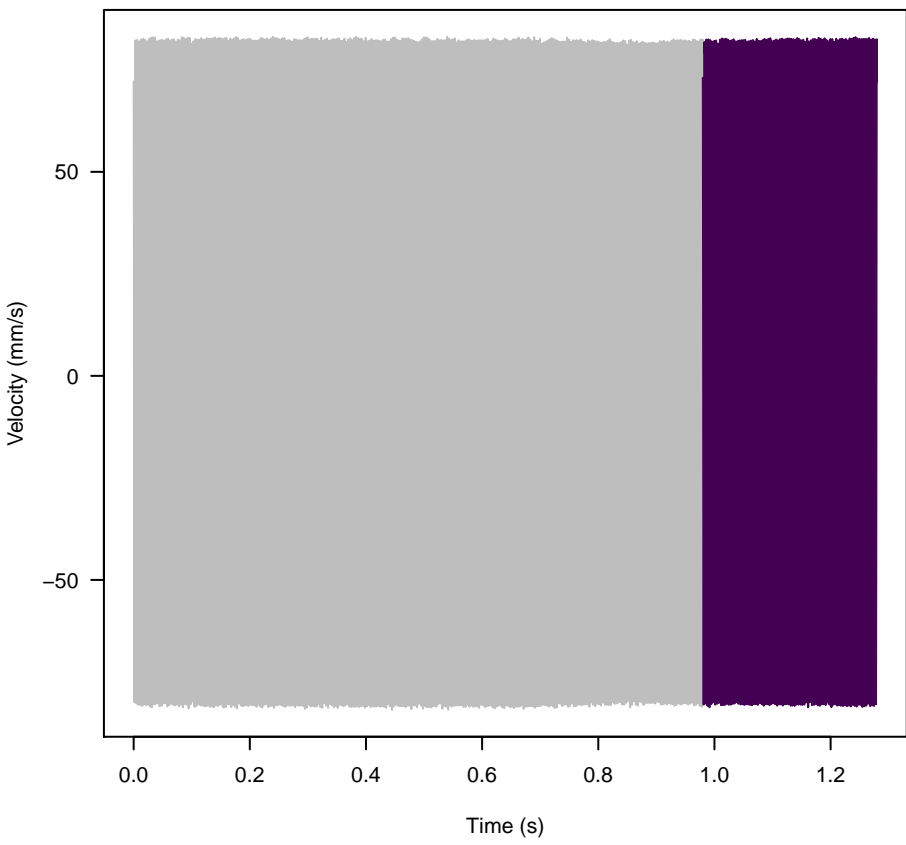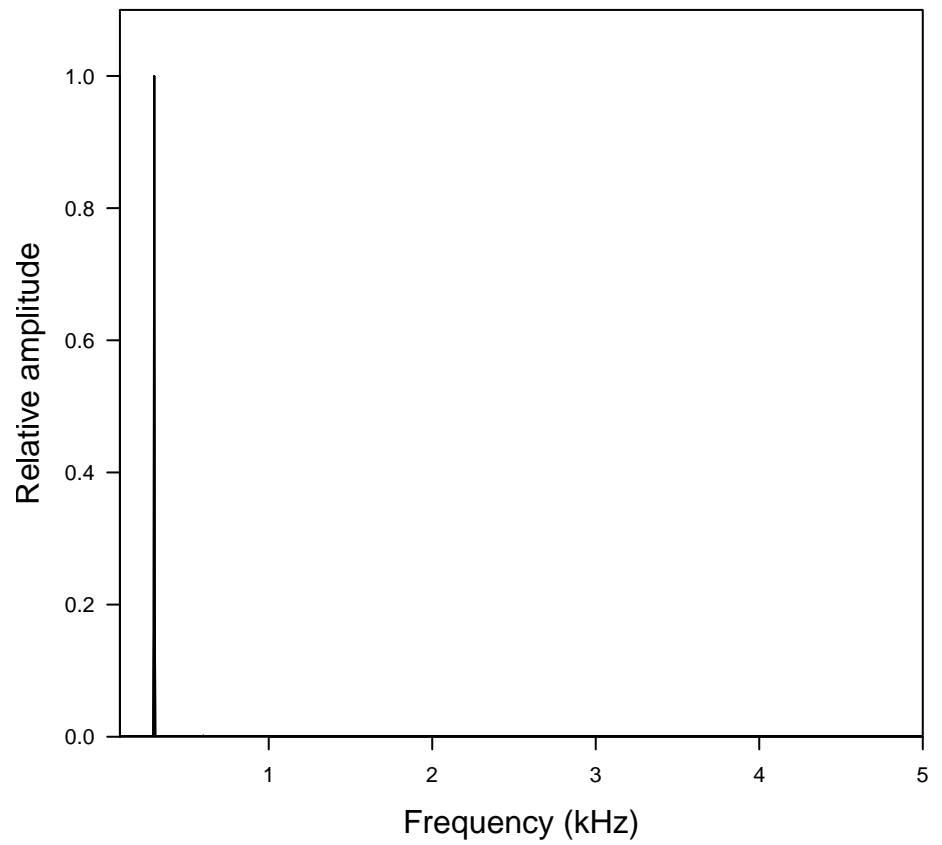

Vel. = 0.057 ; Str. = PA ; Axis = y ; Fl. accession = 10-s-77-12

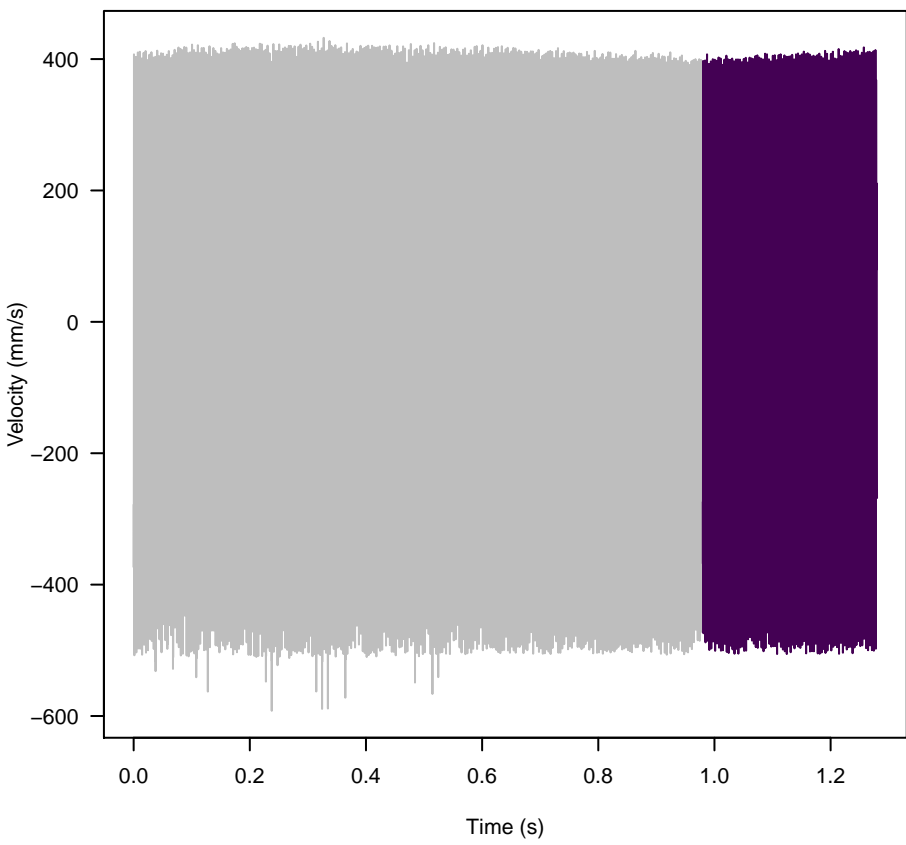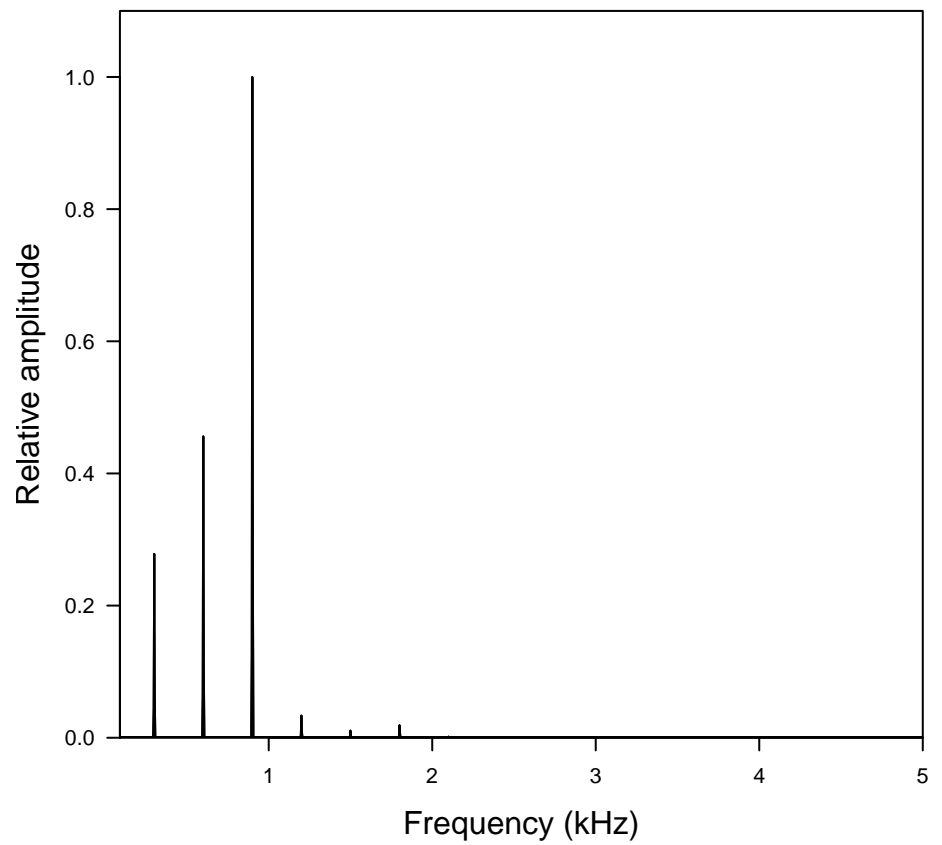

Vel. = 0.057 ; Str. = Receptacle ; Axis = y ; Fl. accession = 10-s-77-12

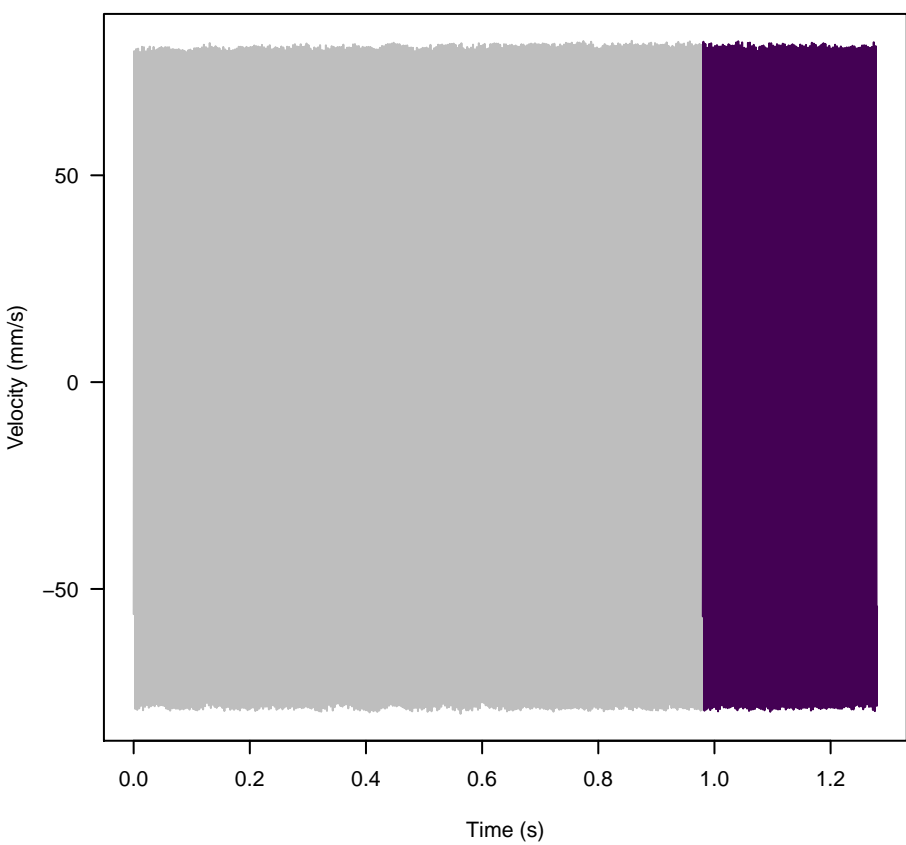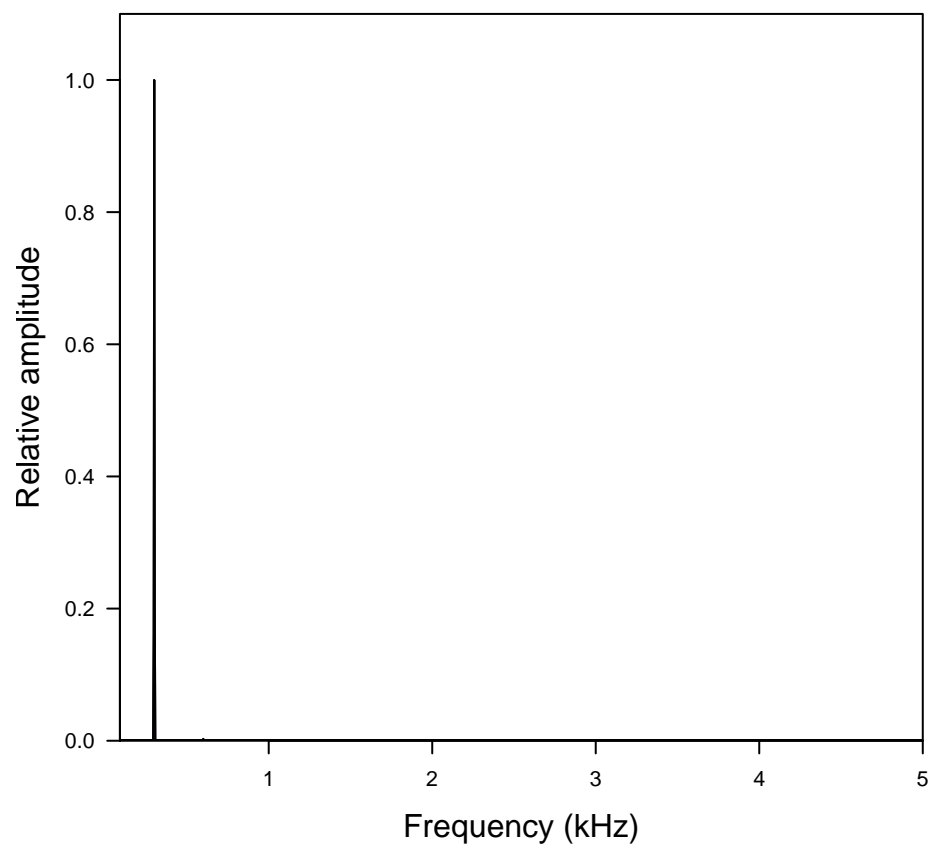

Vel. = 0.014 ; Str. = Corolla ; Axis = y ; Fl. accession = 10-s-86

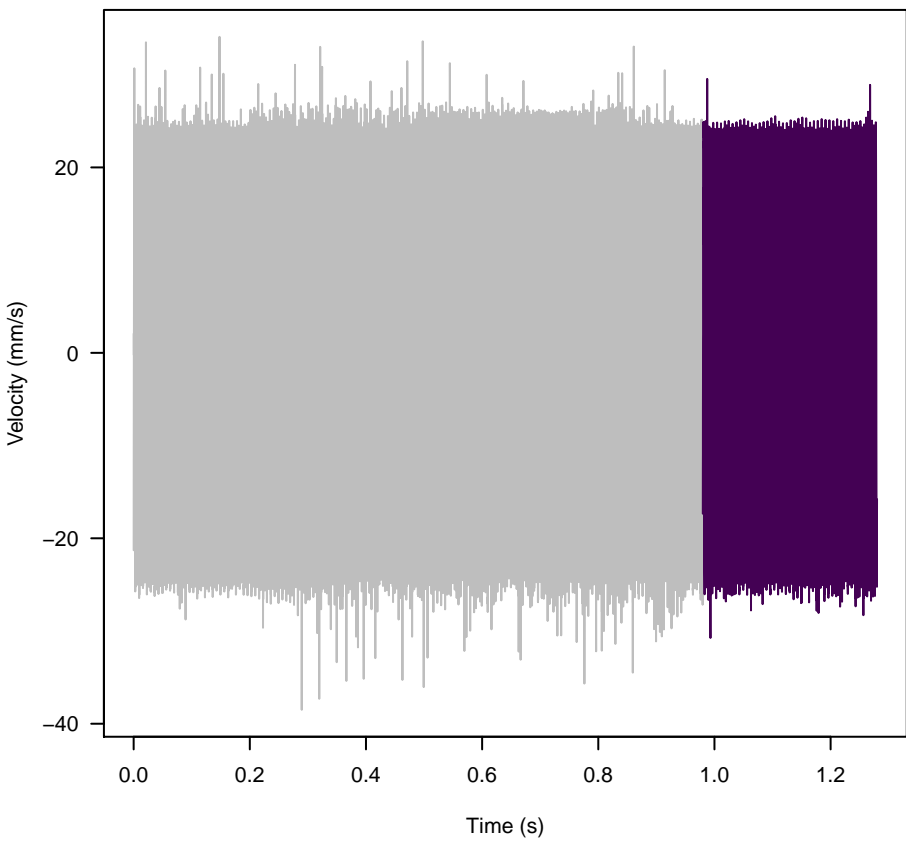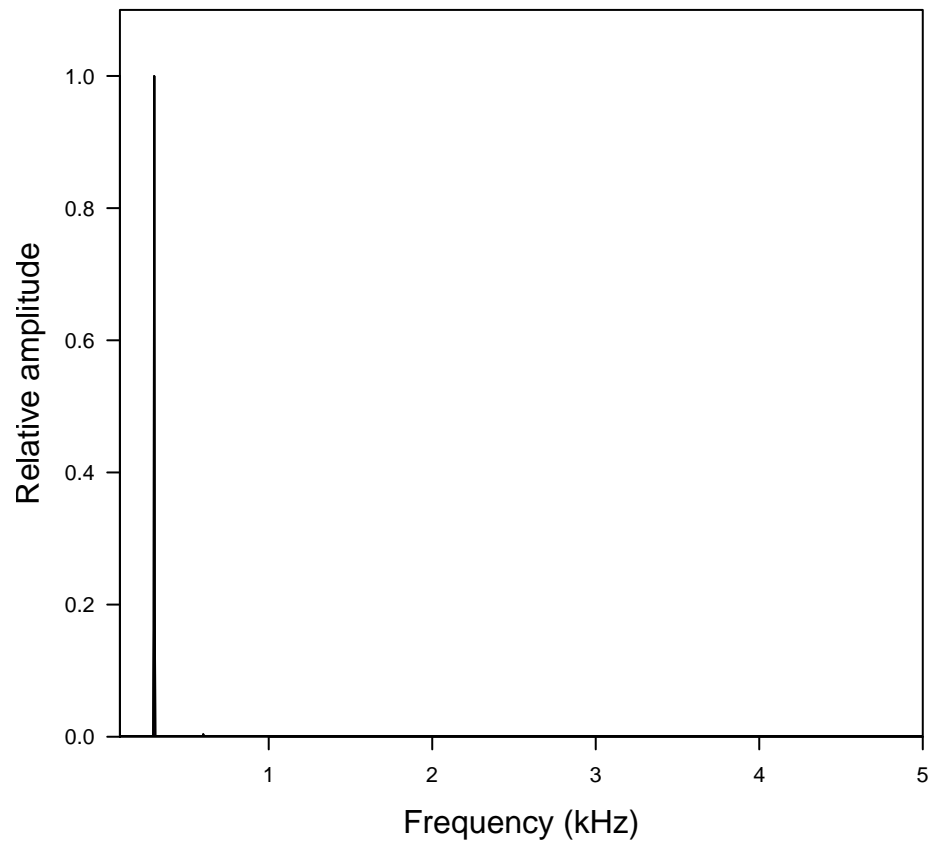

Vel. = 0.014 ; Str. = Receptacle ; Axis = y ; Fl. accession = 10-s-86

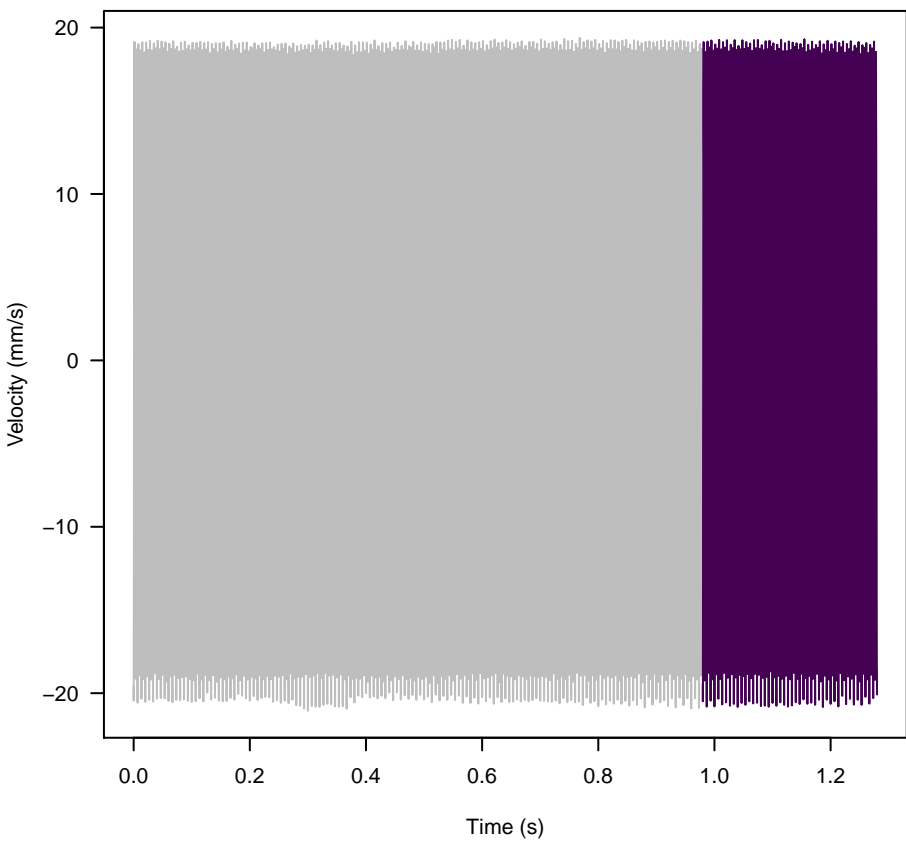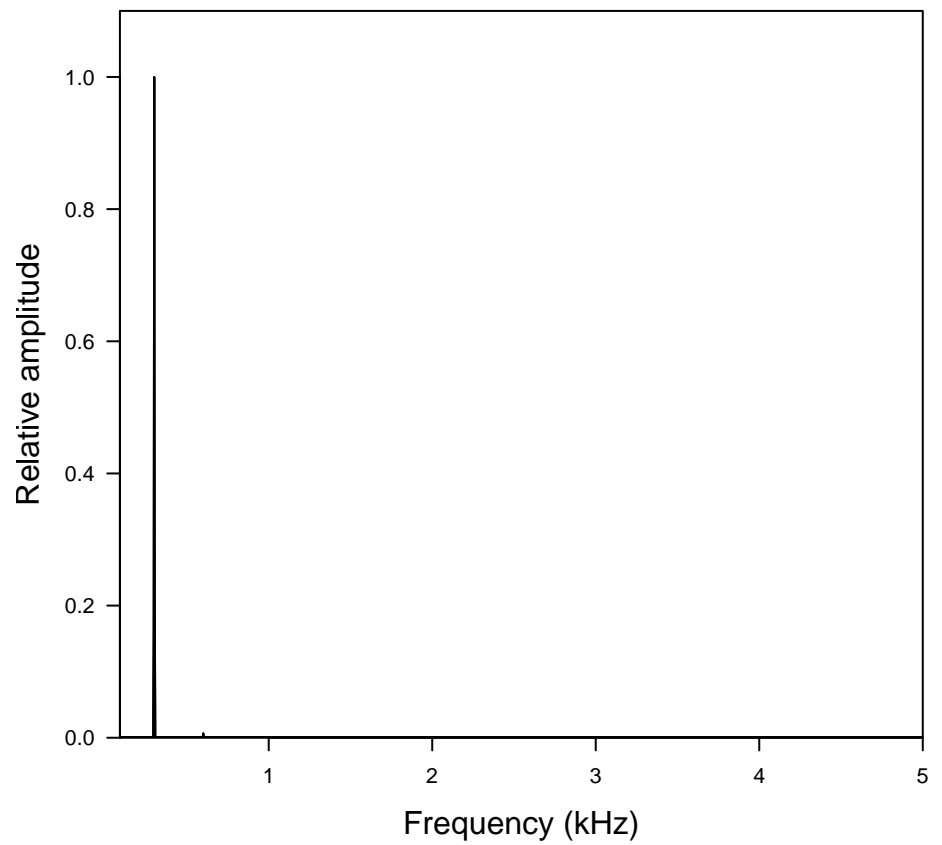

Vel. = 0.014 ; Str. = FA ; Axis = y ; Fl. accession = 10-s-86

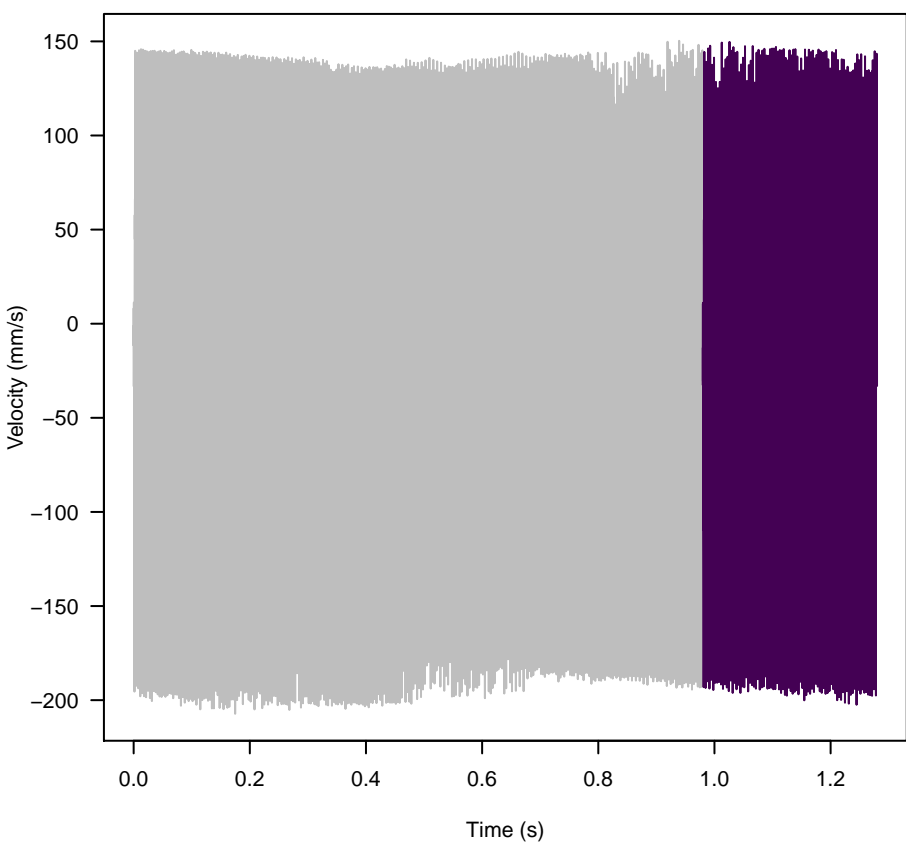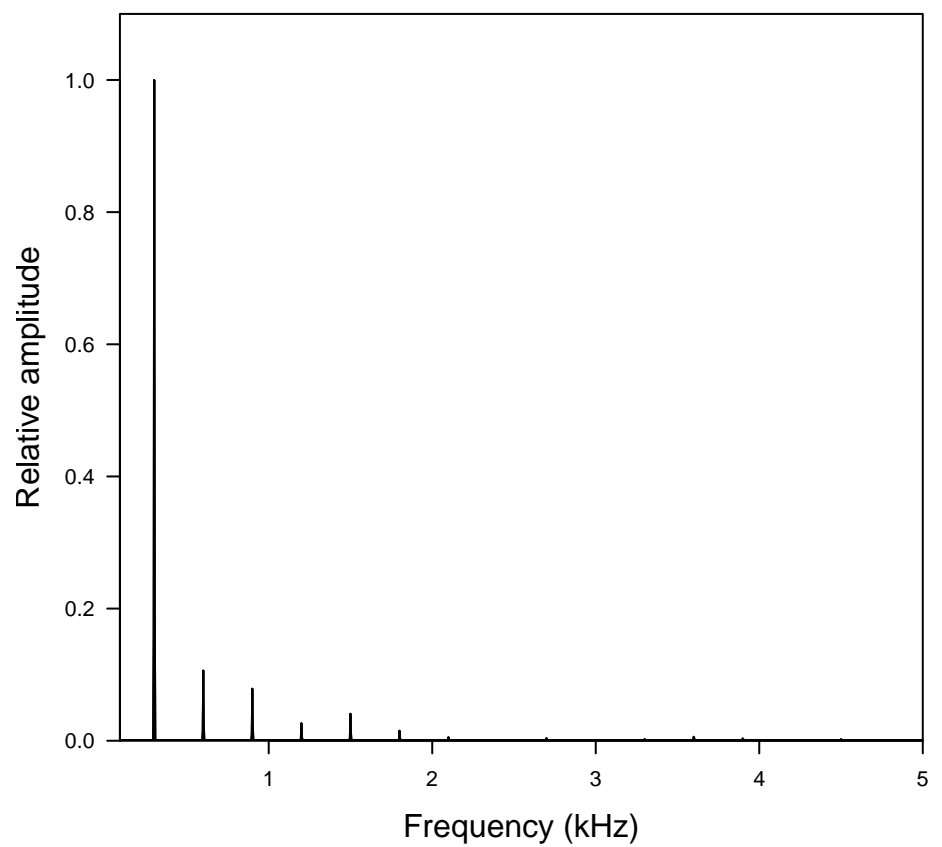

Vel. = 0.014 ; Str. = Receptacle ; Axis = y ; Fl. accession = 10-s-86

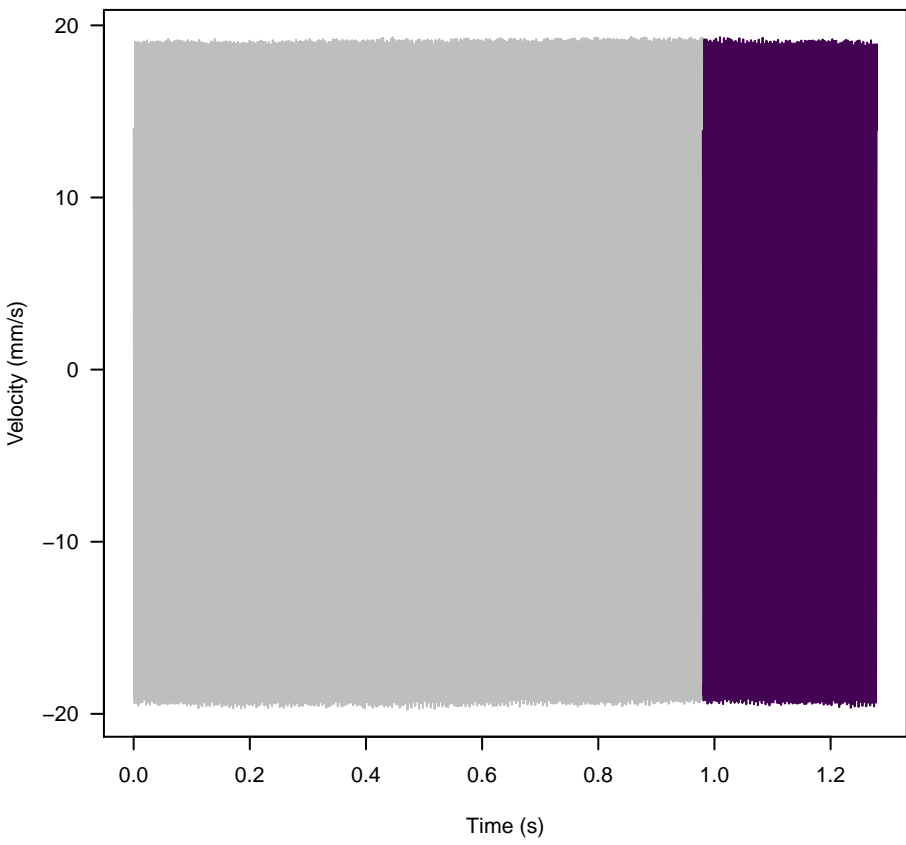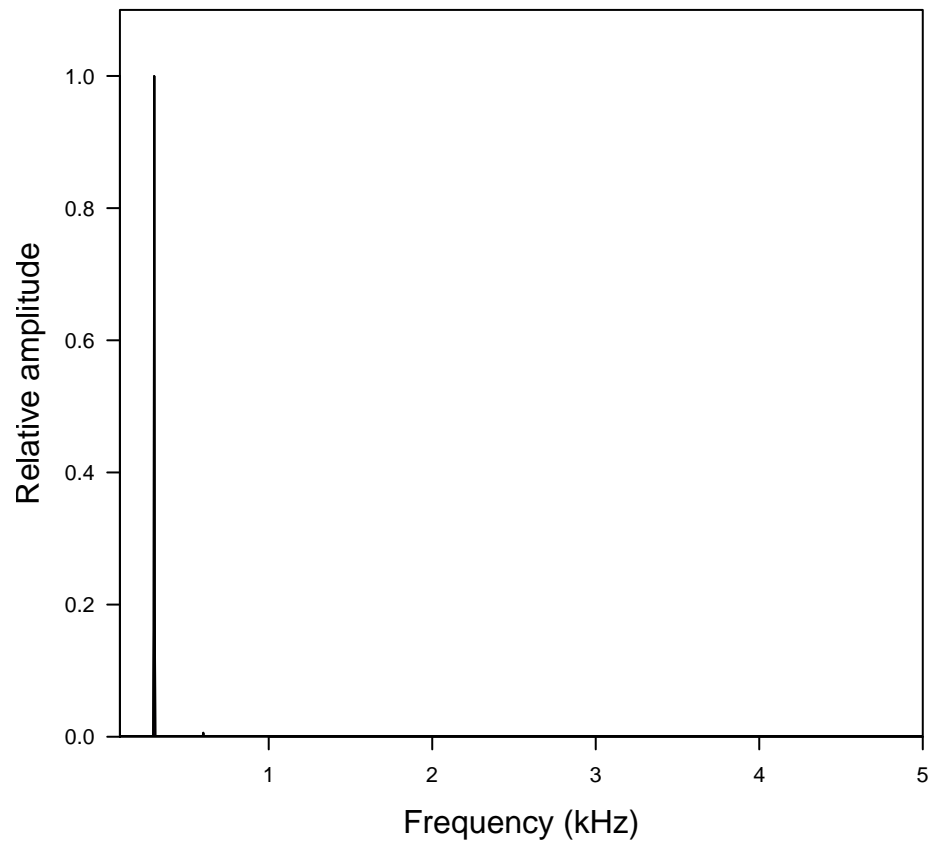

Vel. = 0.014 ; Str. = PA ; Axis = y ; Fl. accession = 10-s-86

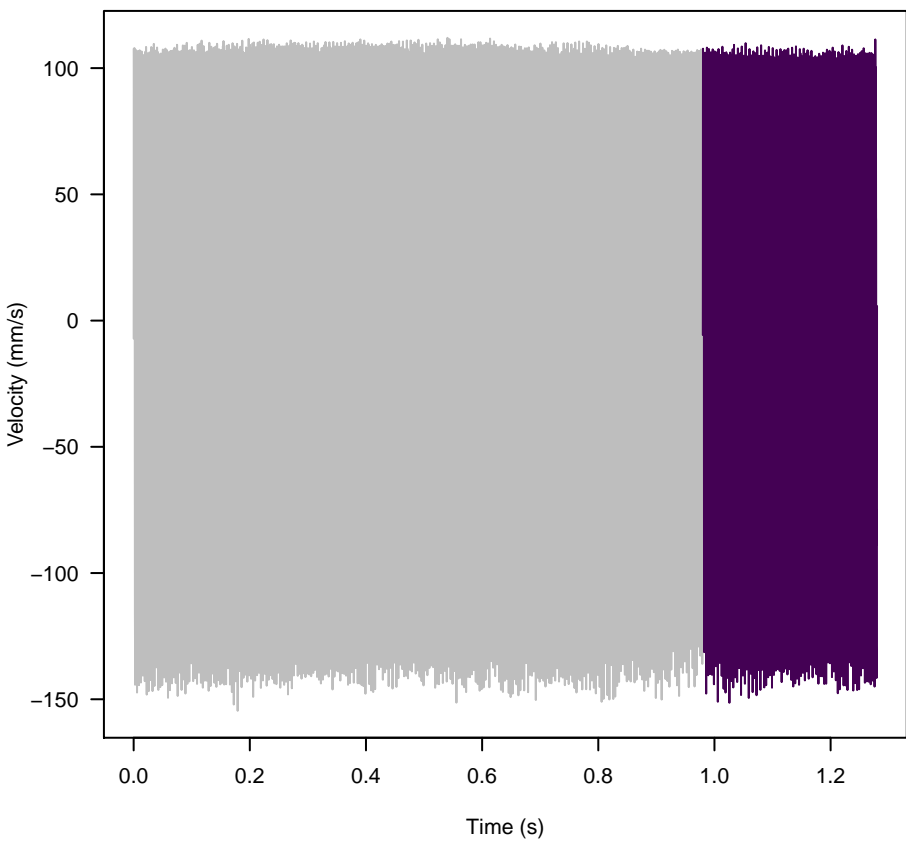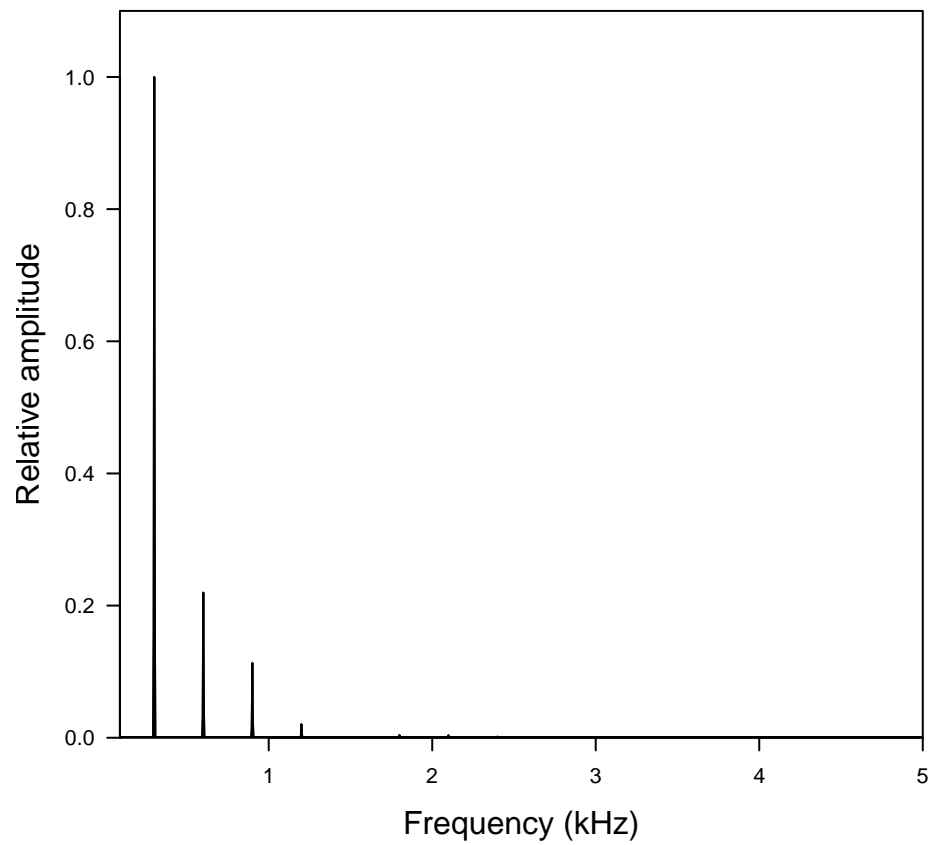

Vel. = 0.014 ; Str. = Receptacle ; Axis = y ; Fl. accession = 10-s-86

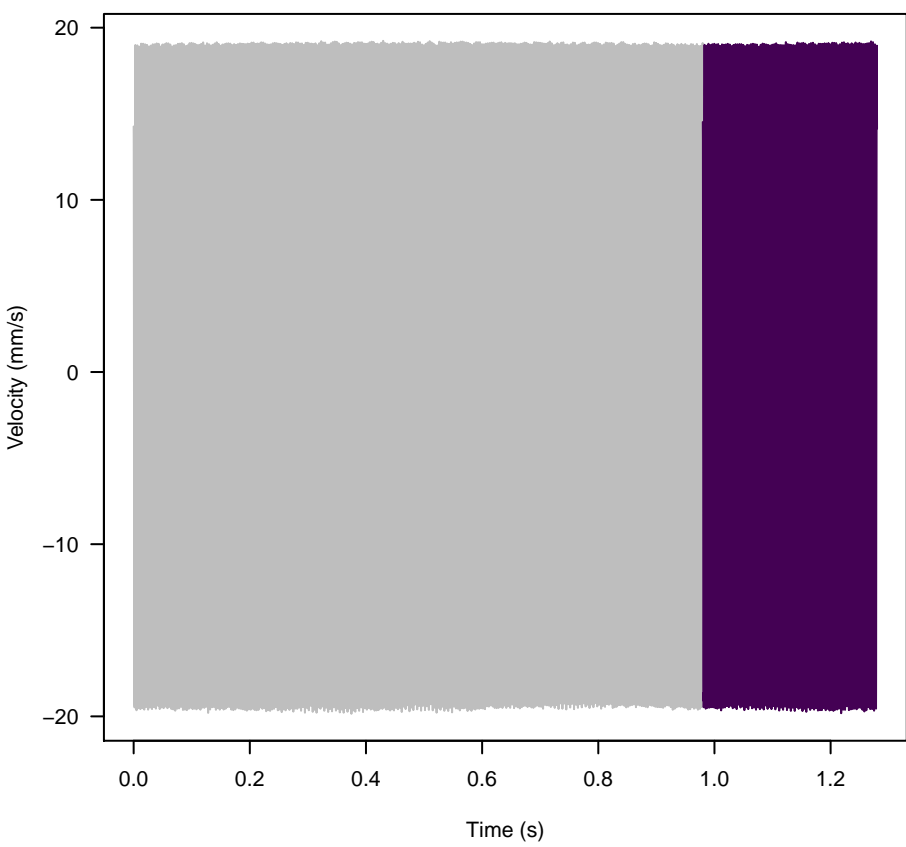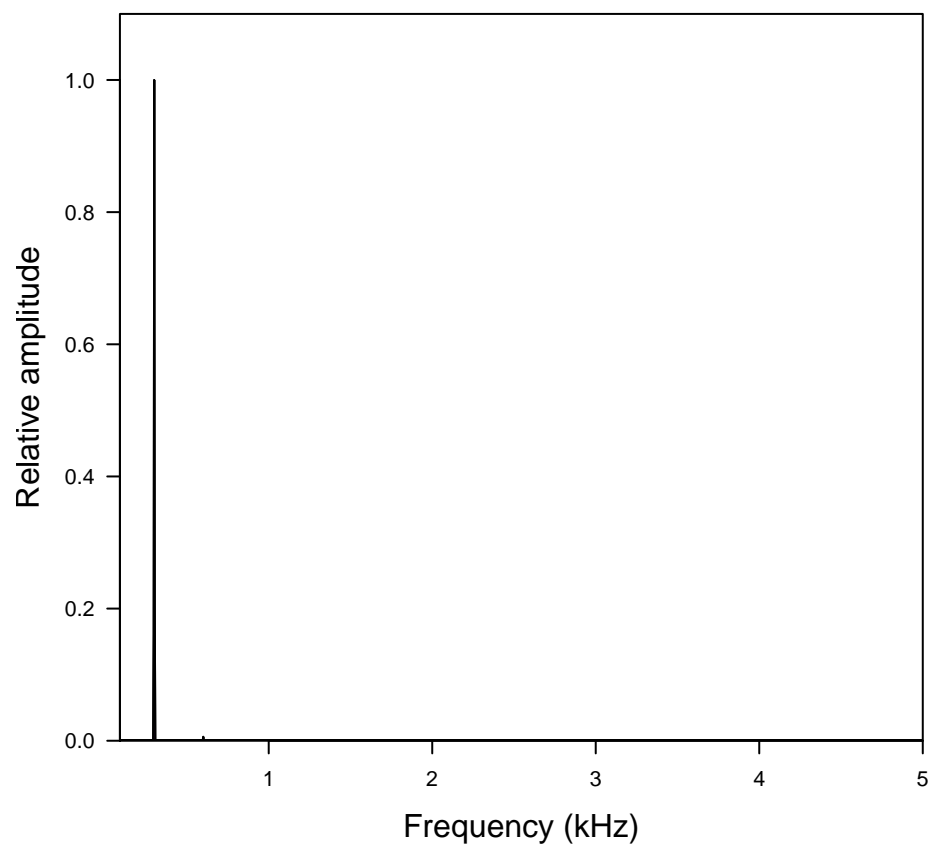

Vel. = 0.028 ; Str. = PA ; Axis = y ; Fl. accession = 10-s-86

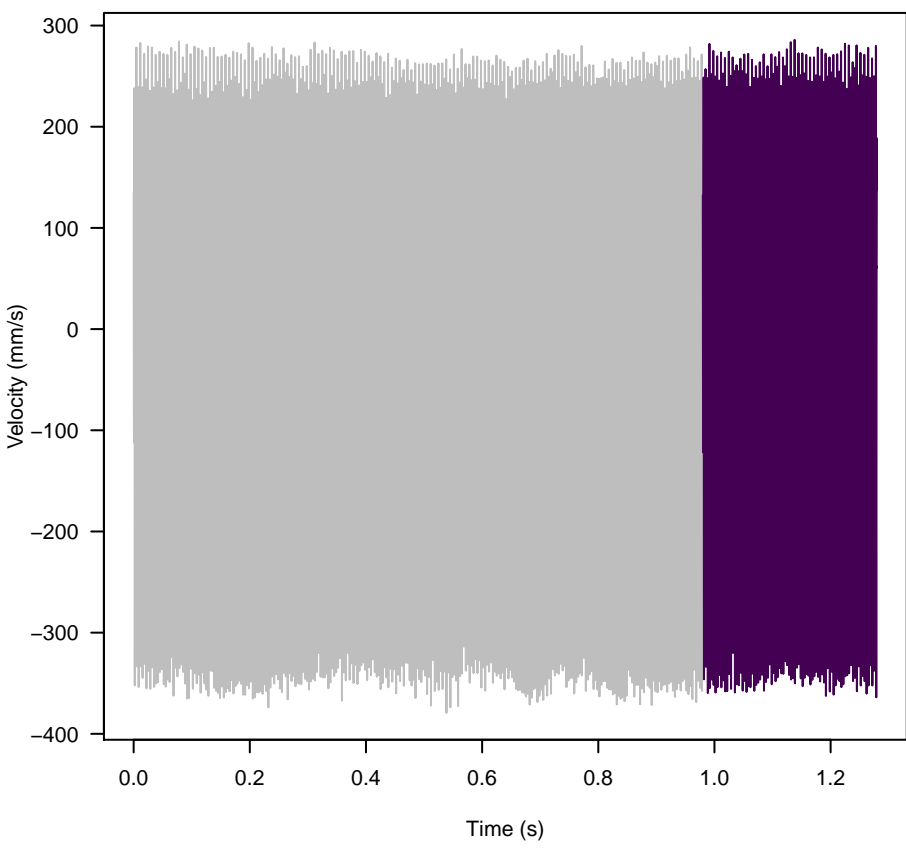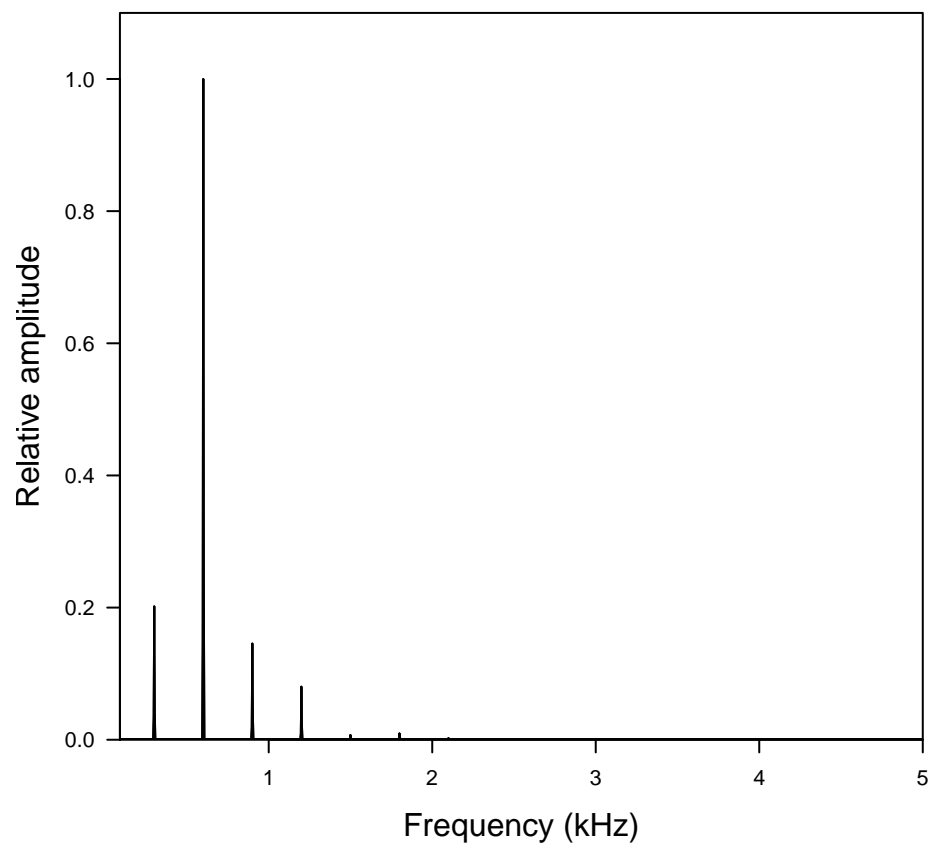

Vel. = 0.028 ; Str. = Receptacle ; Axis = y ; Fl. accession = 10-s-86

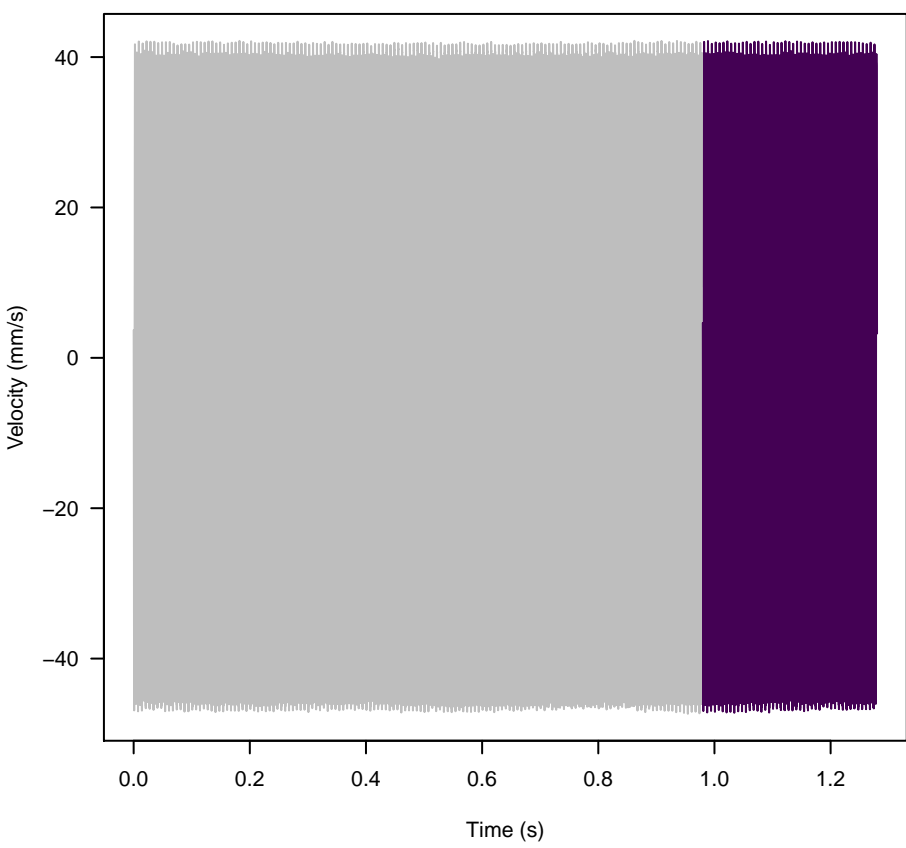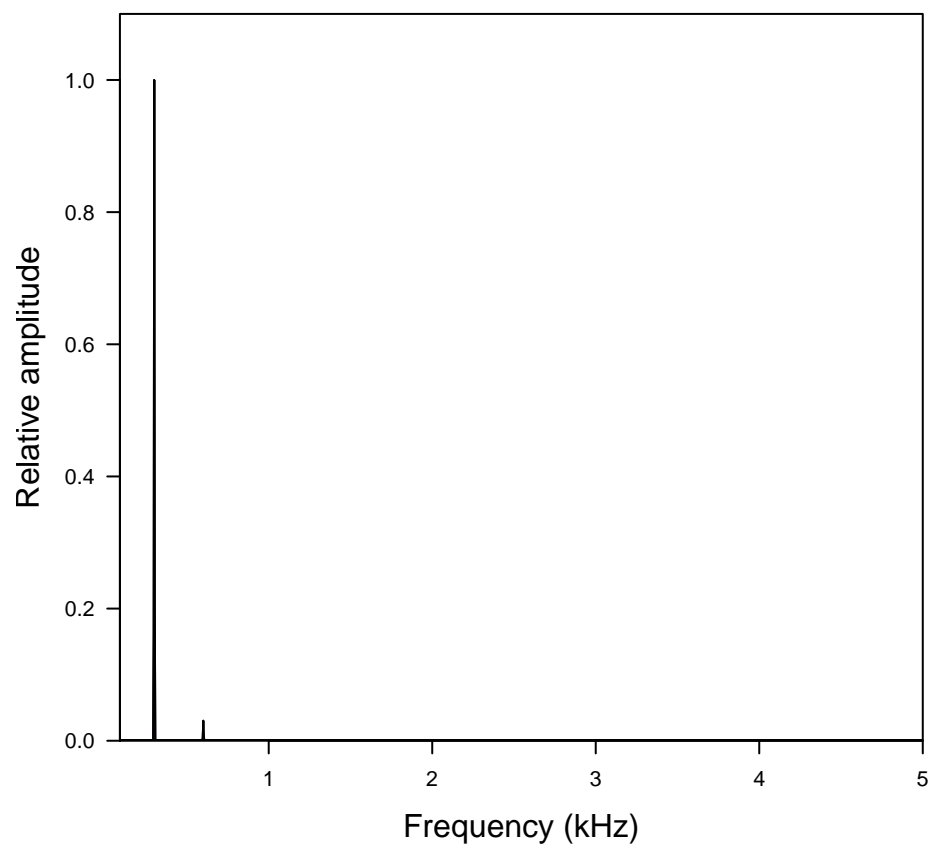

Vel. = 0.028 ; Str. = FA ; Axis = y ; Fl. accession = 10-s-86

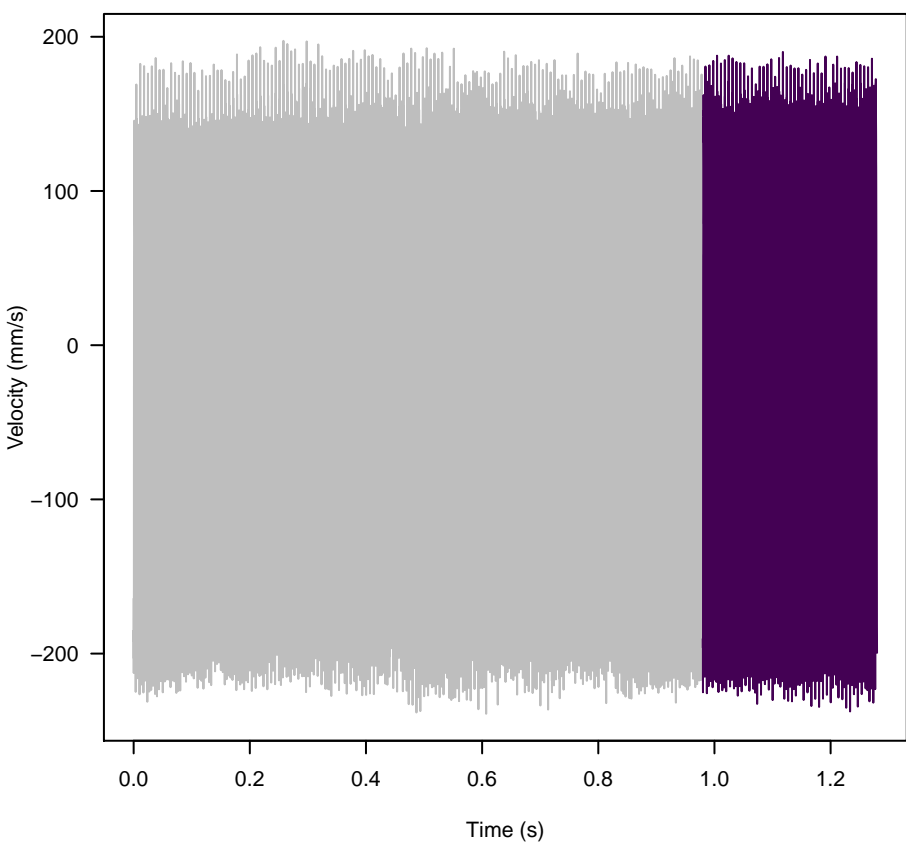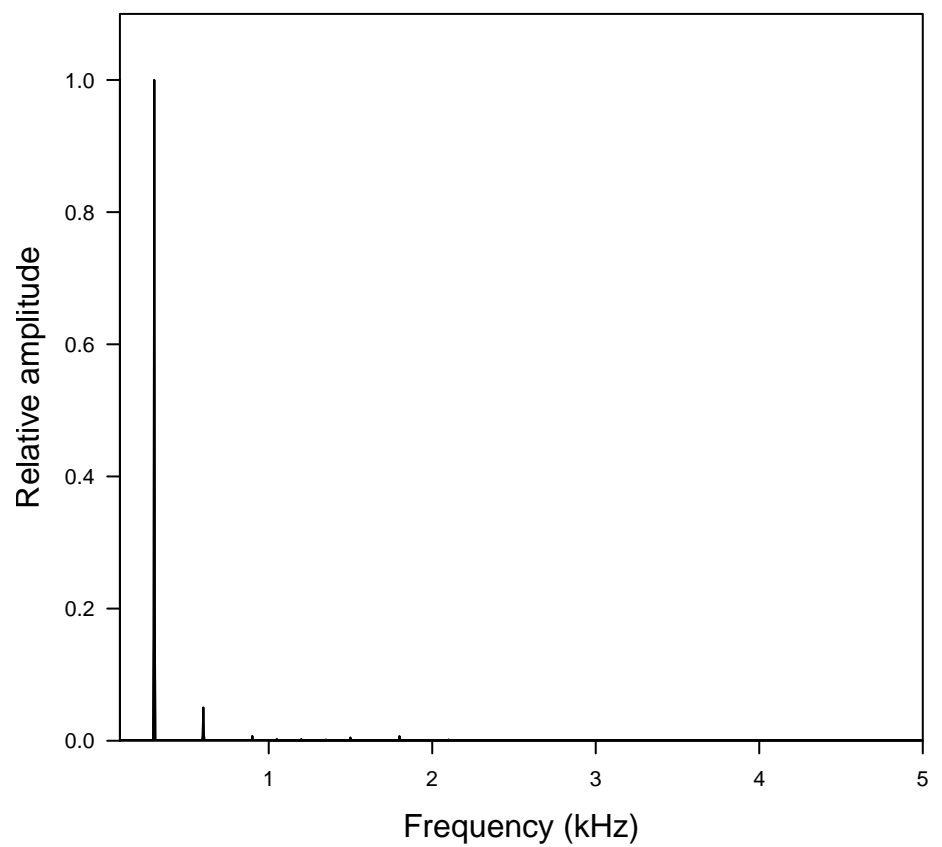

Vel. = 0.028 ; Str. = Receptacle ; Axis = y ; Fl. accession = 10-s-86

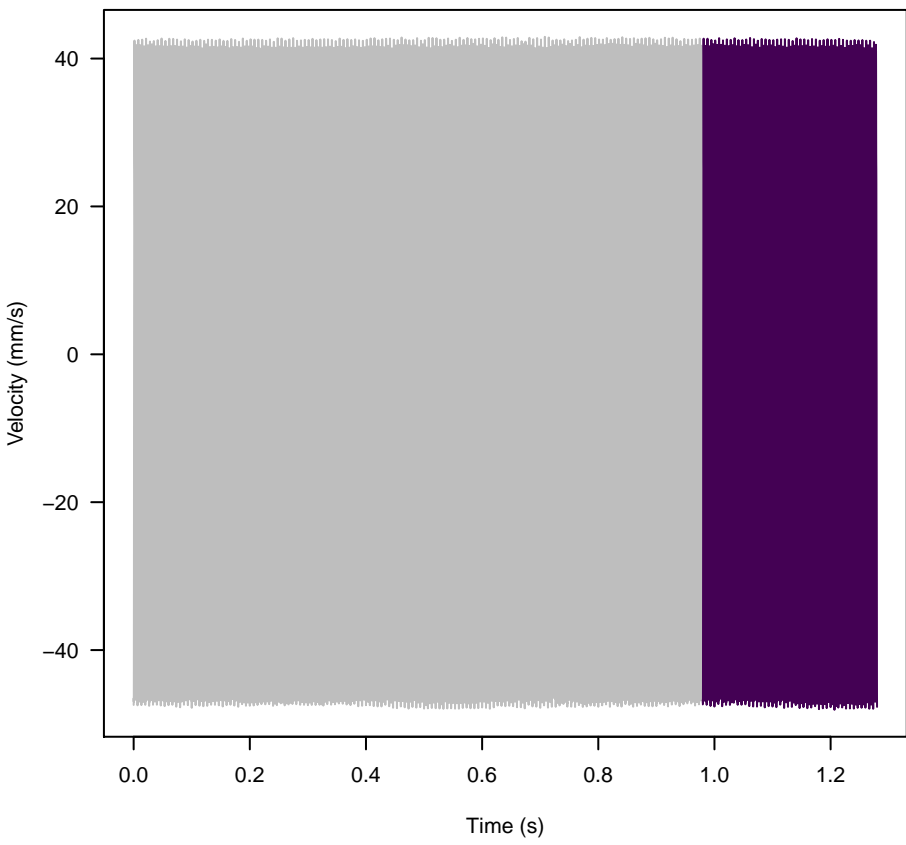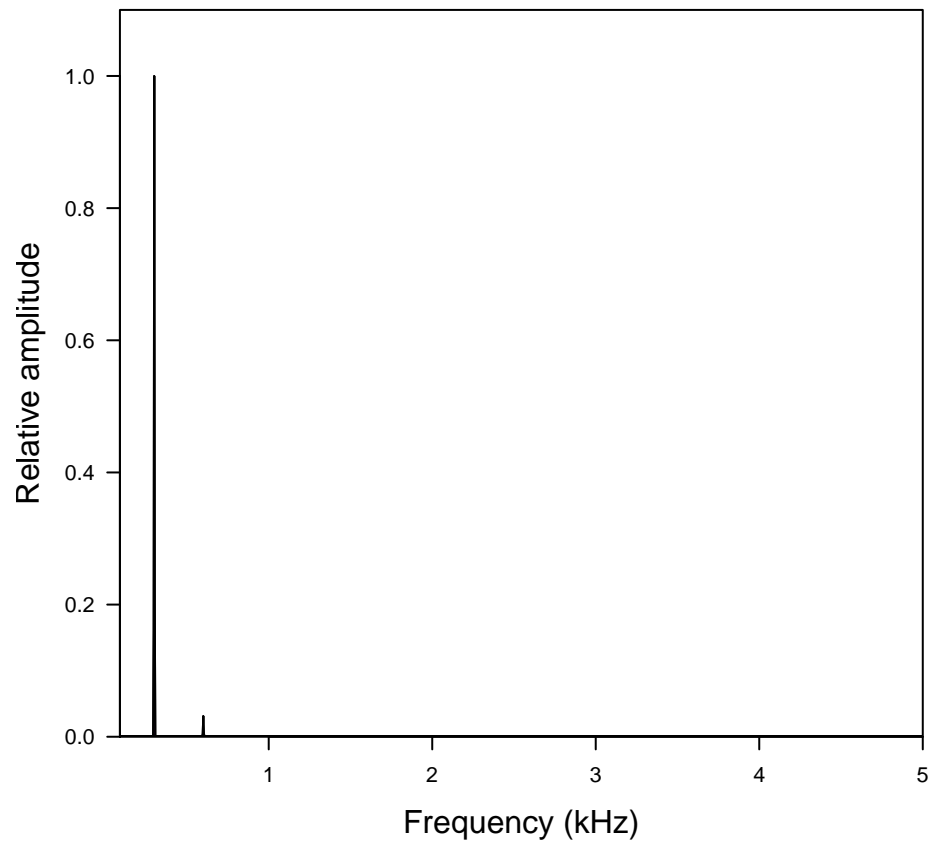

Vel. = 0.028 ; Str. = Corolla ; Axis = y ; Fl. accession = 10-s-86

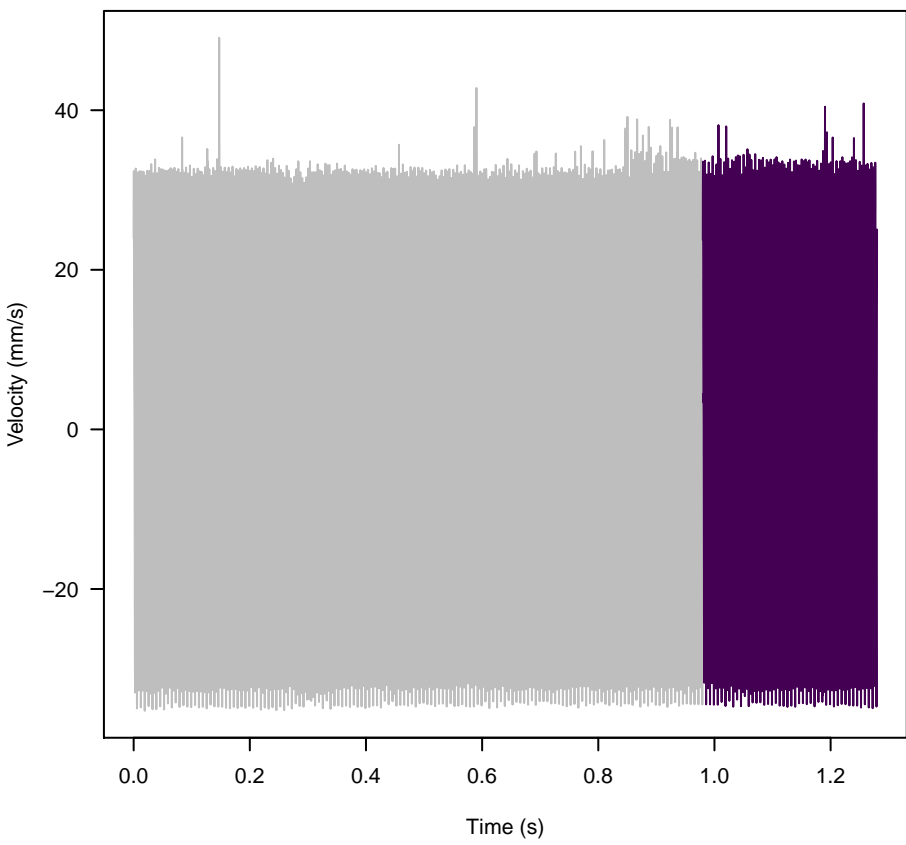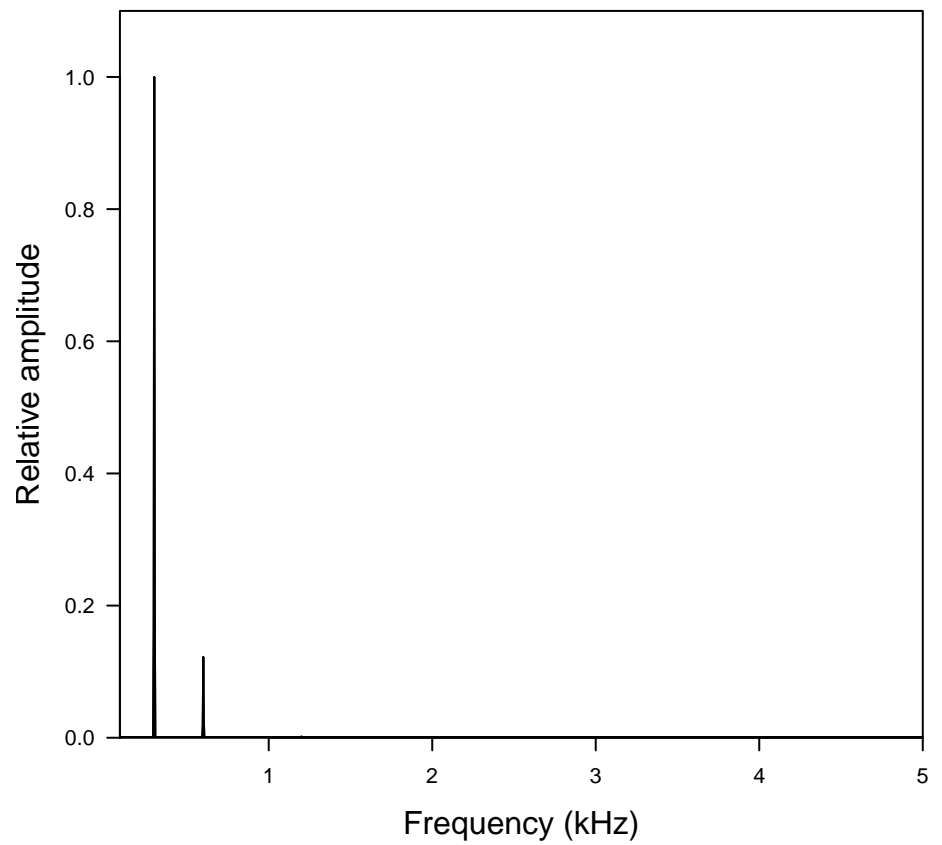

Vel. = 0.028 ; Str. = Receptacle ; Axis = y ; Fl. accession = 10-s-86

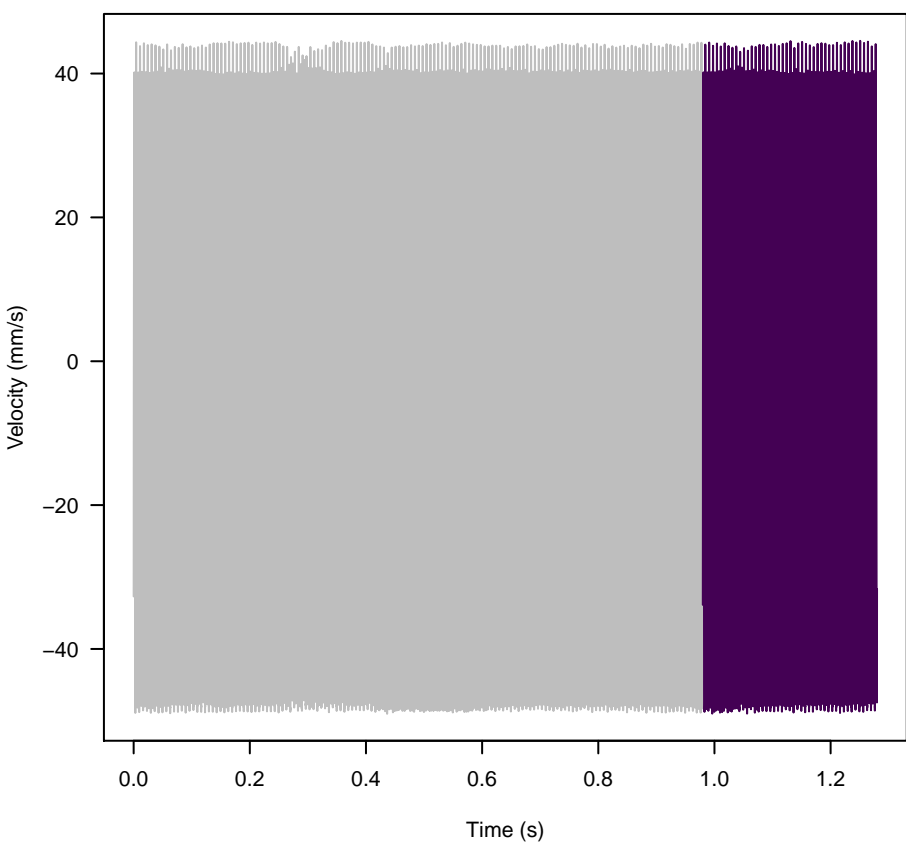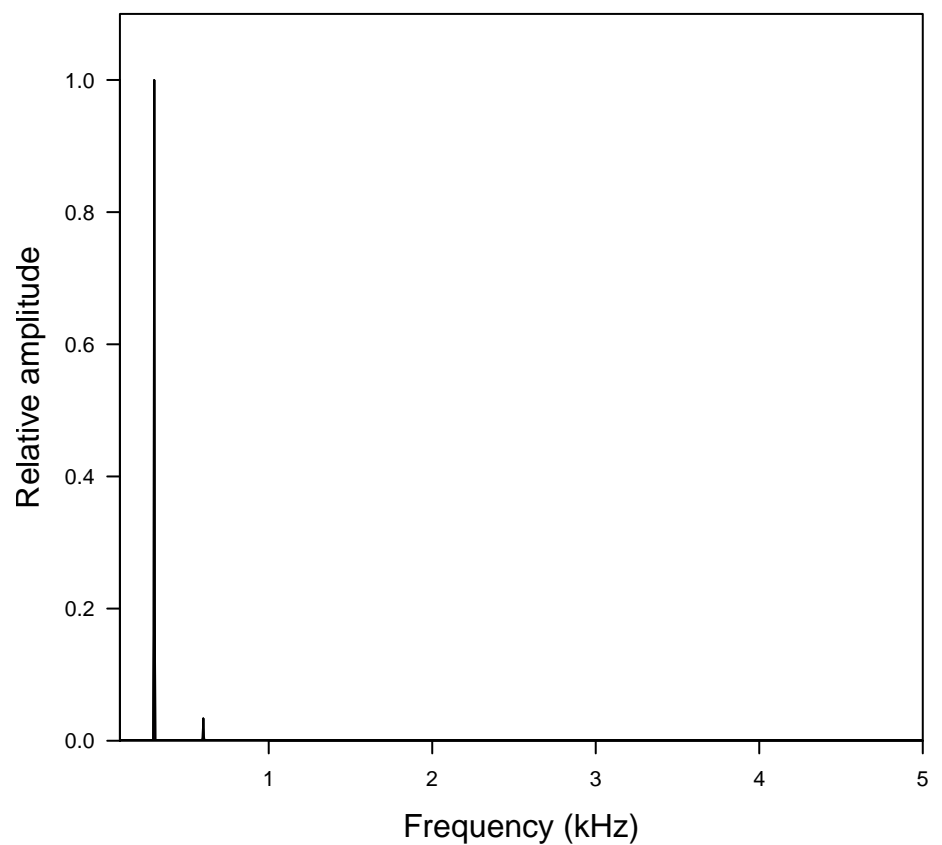

Vel. = 0.057 ; Str. = Corolla ; Axis = y ; Fl. accession = 10-s-86

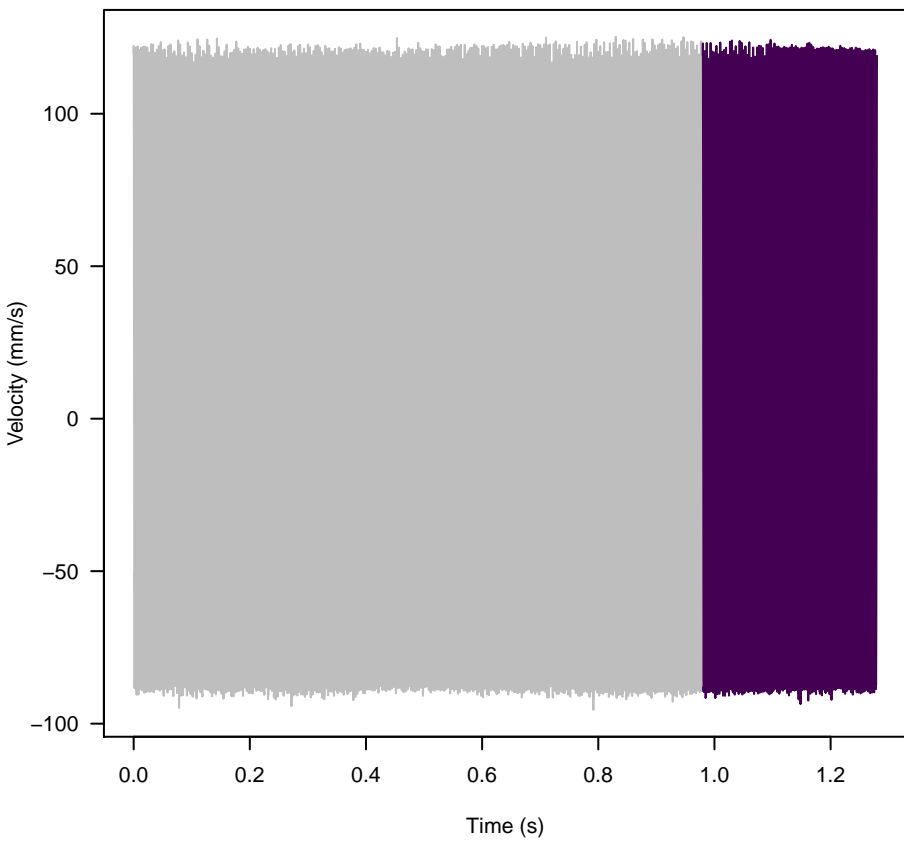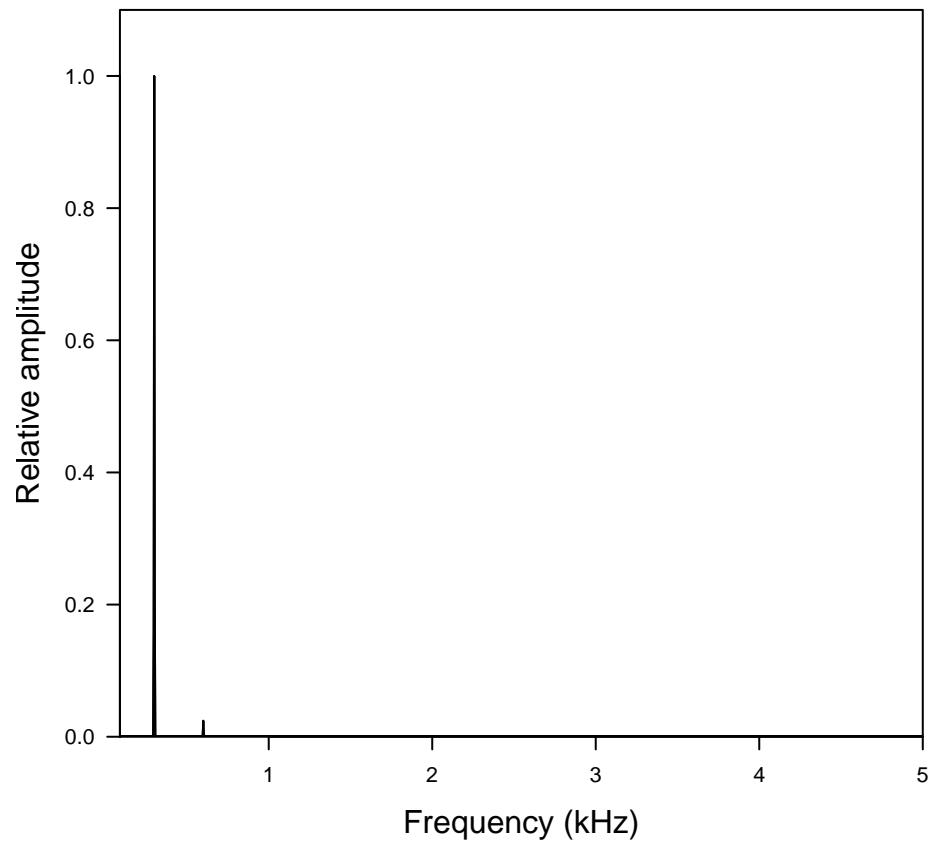

Vel. = 0.057 ; Str. = Receptacle ; Axis = y ; Fl. accession = 10-s-86

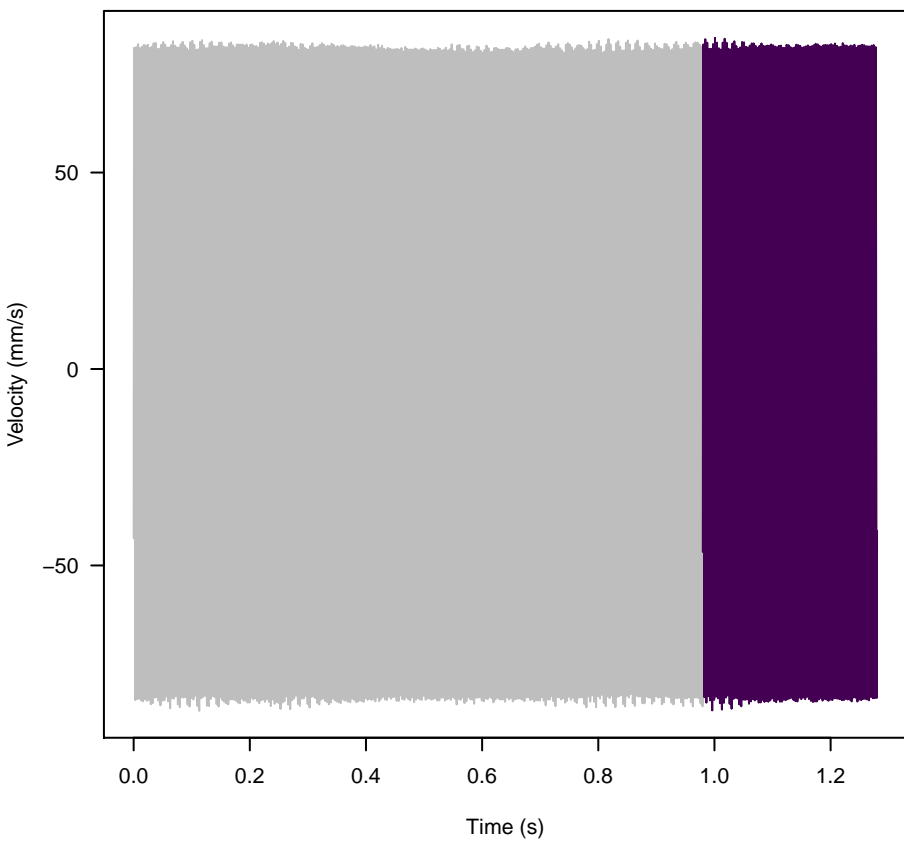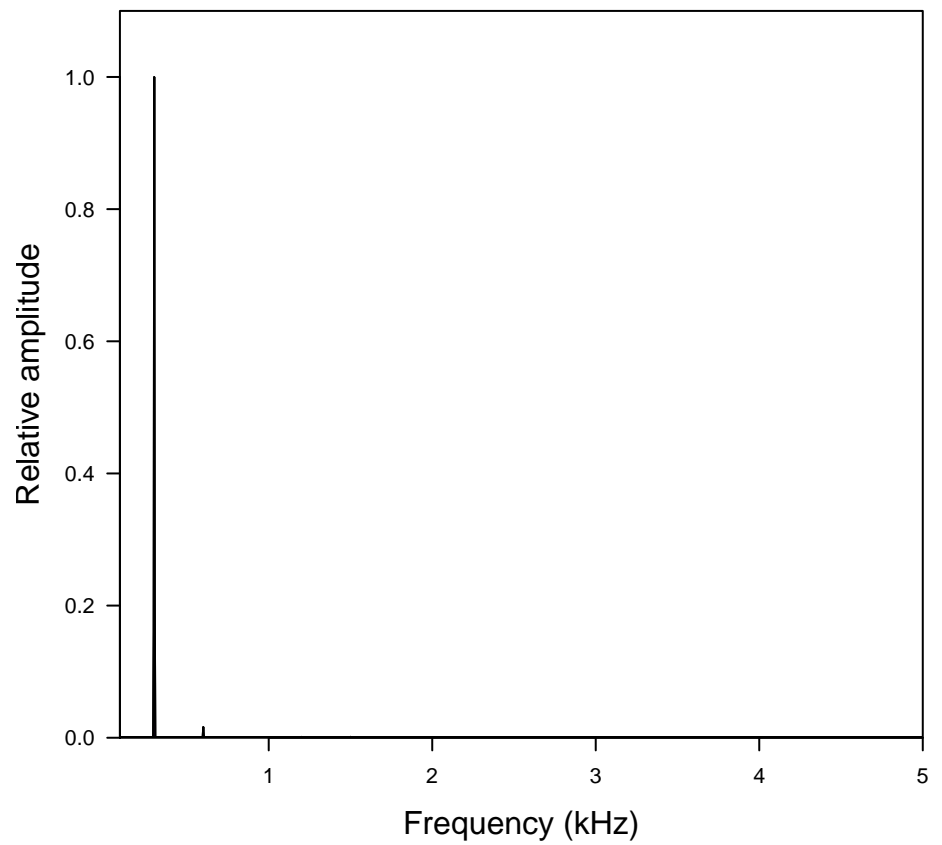

Vel. = 0.057 ; Str. = FA ; Axis = y ; Fl. accession = 10-s-86

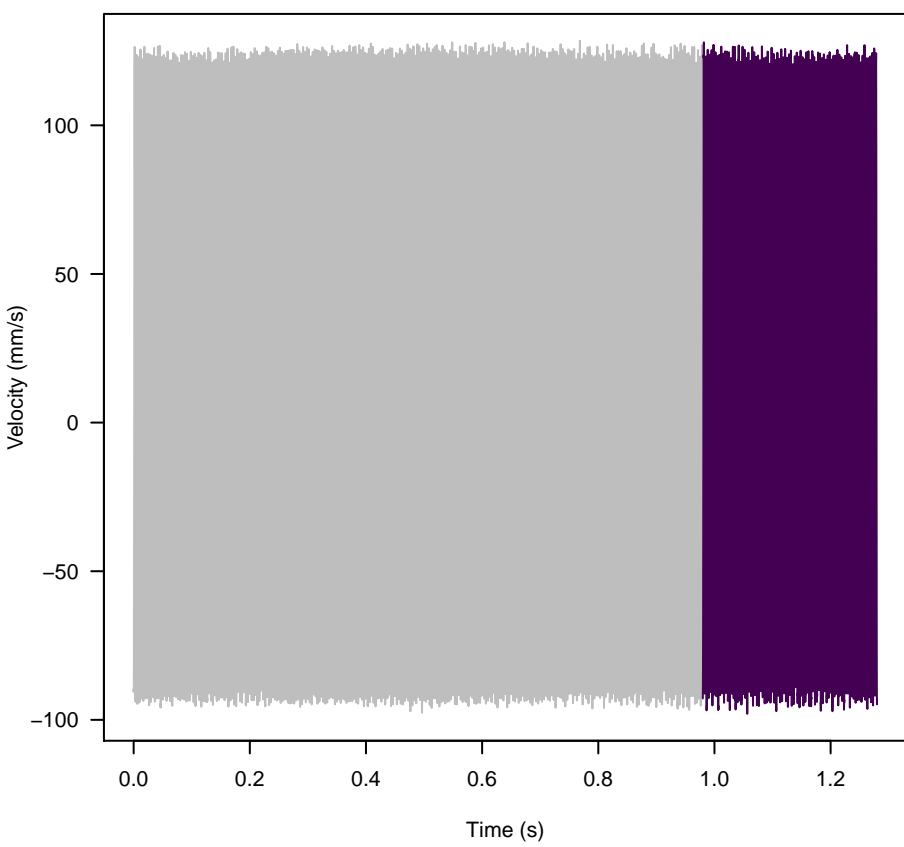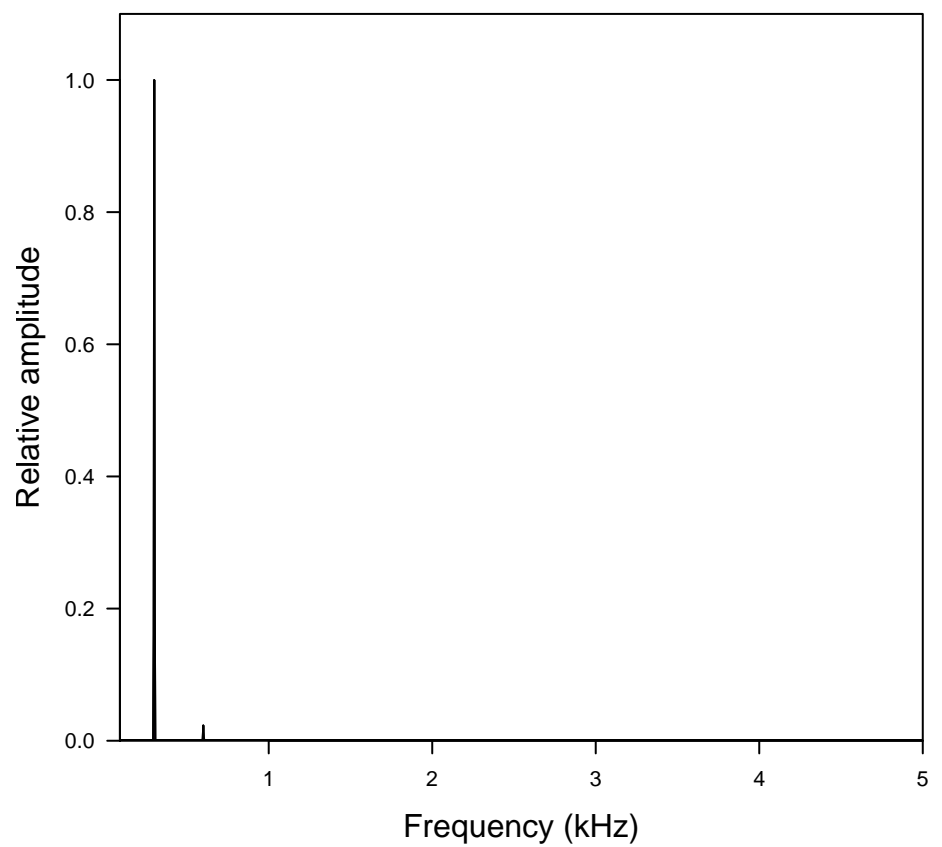

Vel. = 0.057 ; Str. = Receptacle ; Axis = y ; Fl. accession = 10-s-86

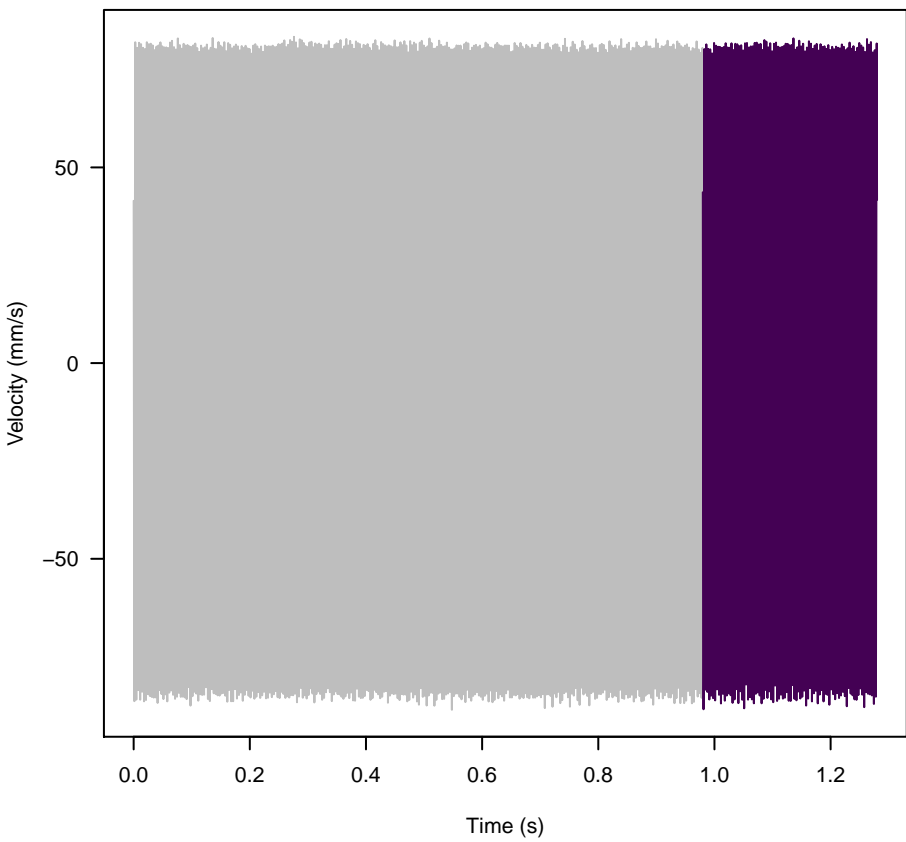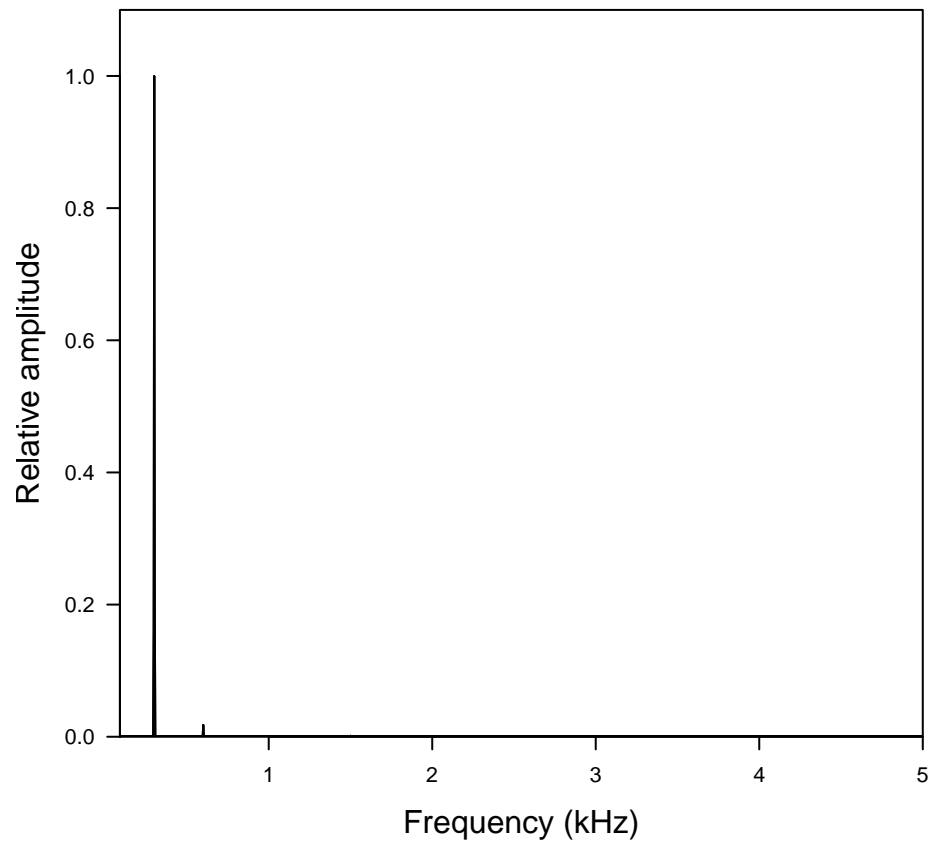

Vel. = 0.057 ; Str. = PA ; Axis = y ; Fl. accession = 10-s-86

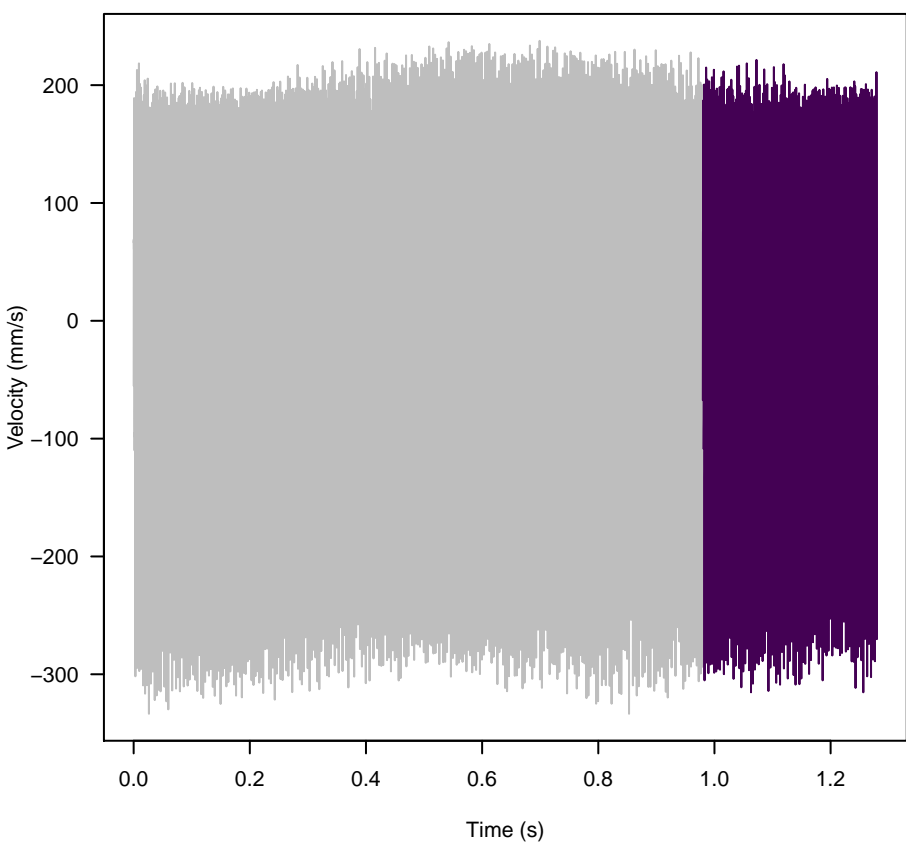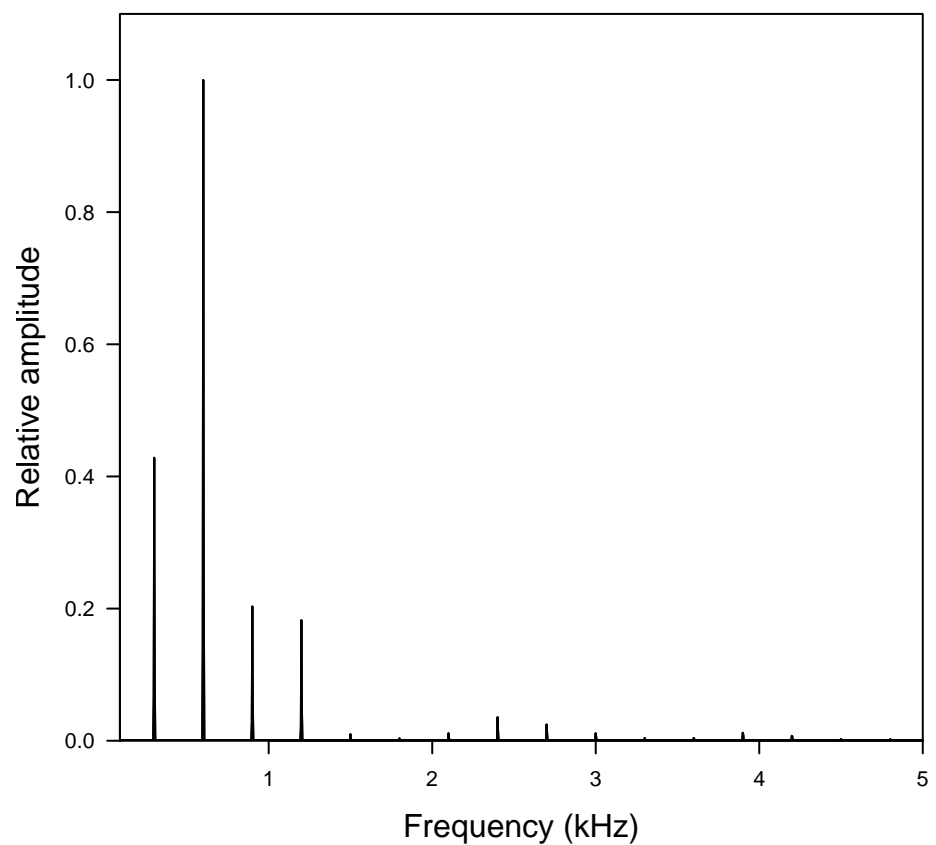

Vel. = 0.057 ; Str. = Receptacle ; Axis = y ; Fl. accession = 10-s-86

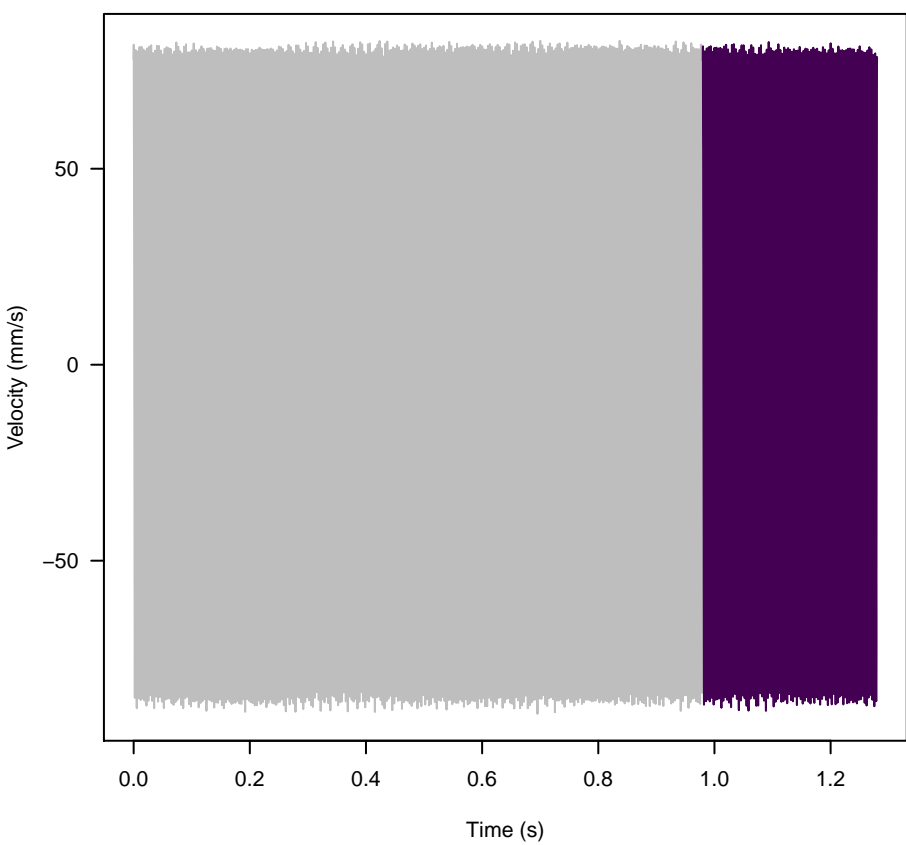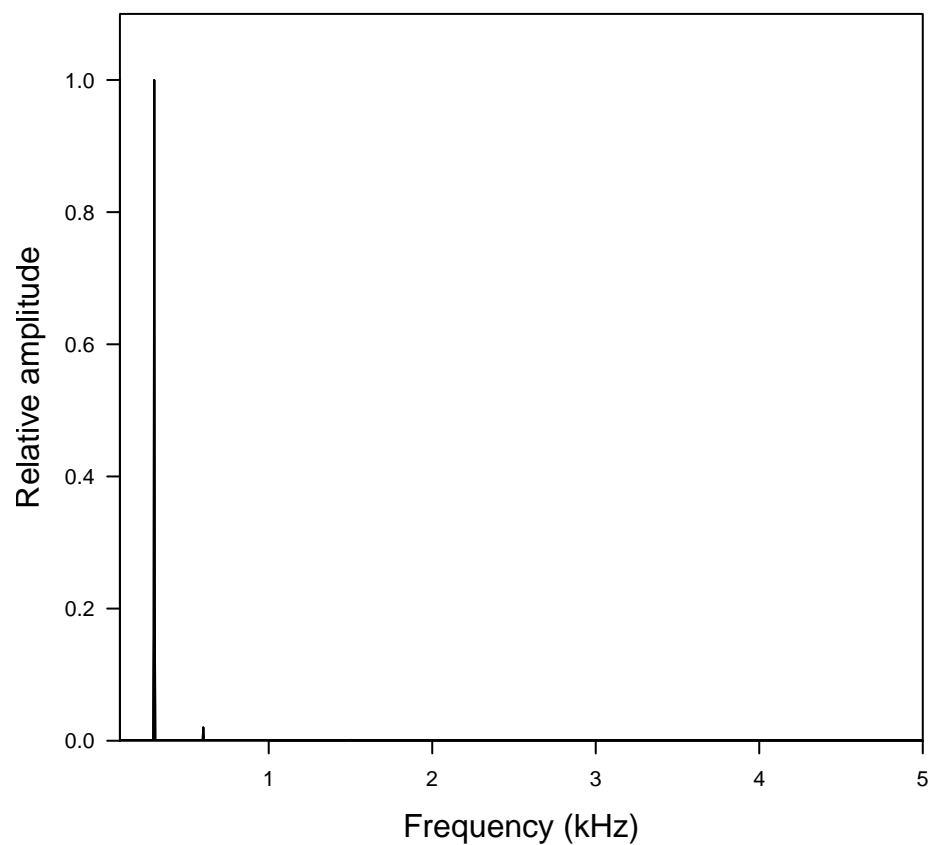



Vel. = 0.014 ; Str. = Corolla ; Axis = z ; Fl. accession = 10-s-86

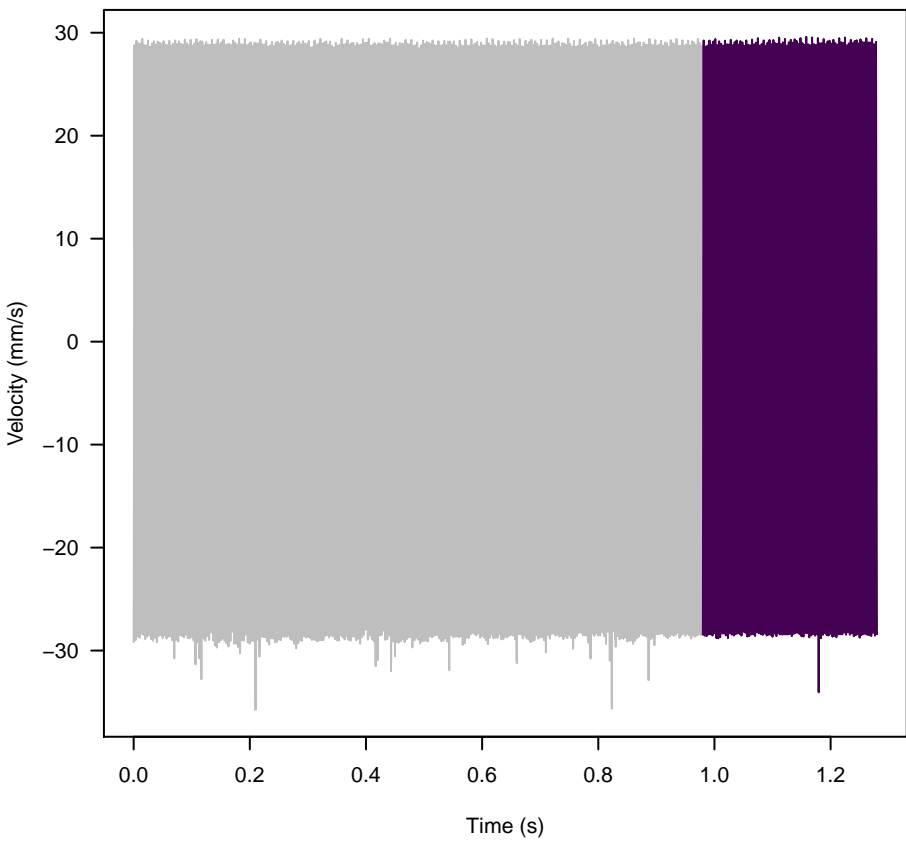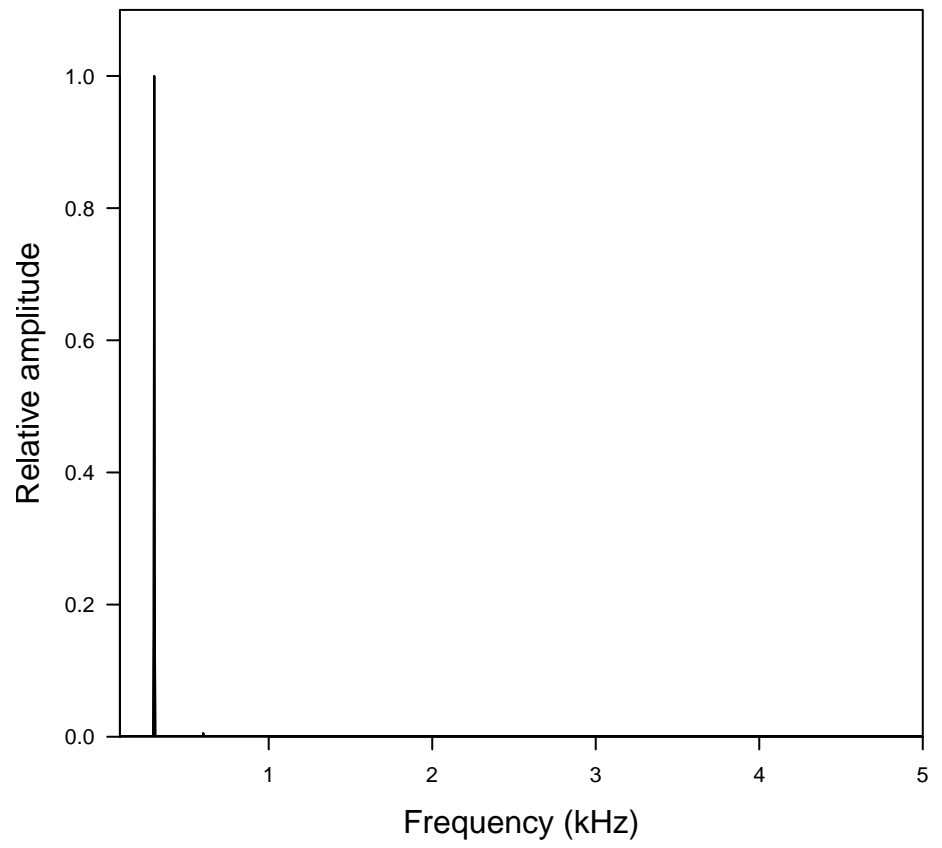

Vel. = 0.014 ; Str. = Receptacle ; Axis = z ; Fl. accession = 10-s-86

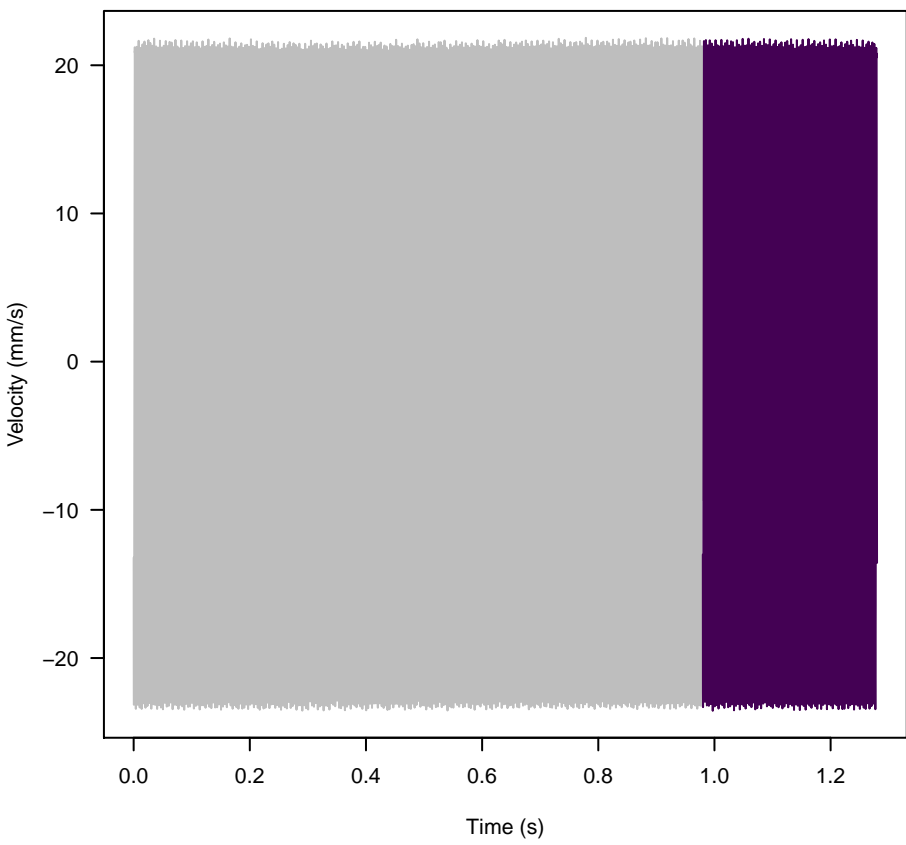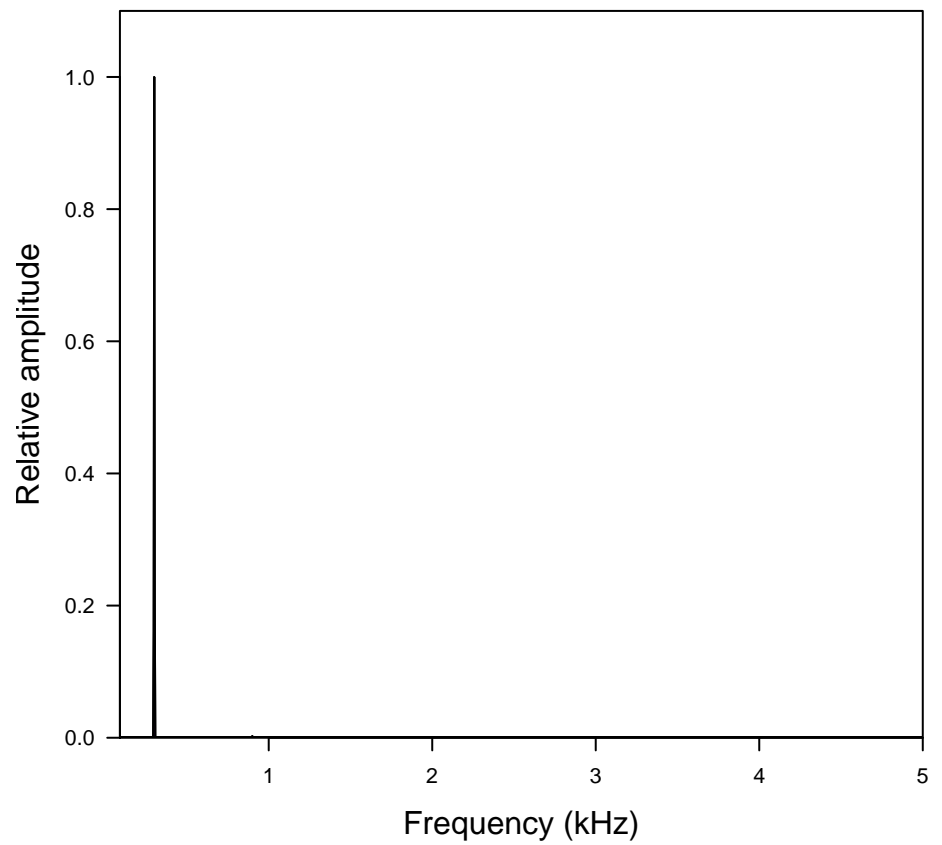

Vel. = 0.014 ; Str. = FA ; Axis = z ; Fl. accession = 10-s-86

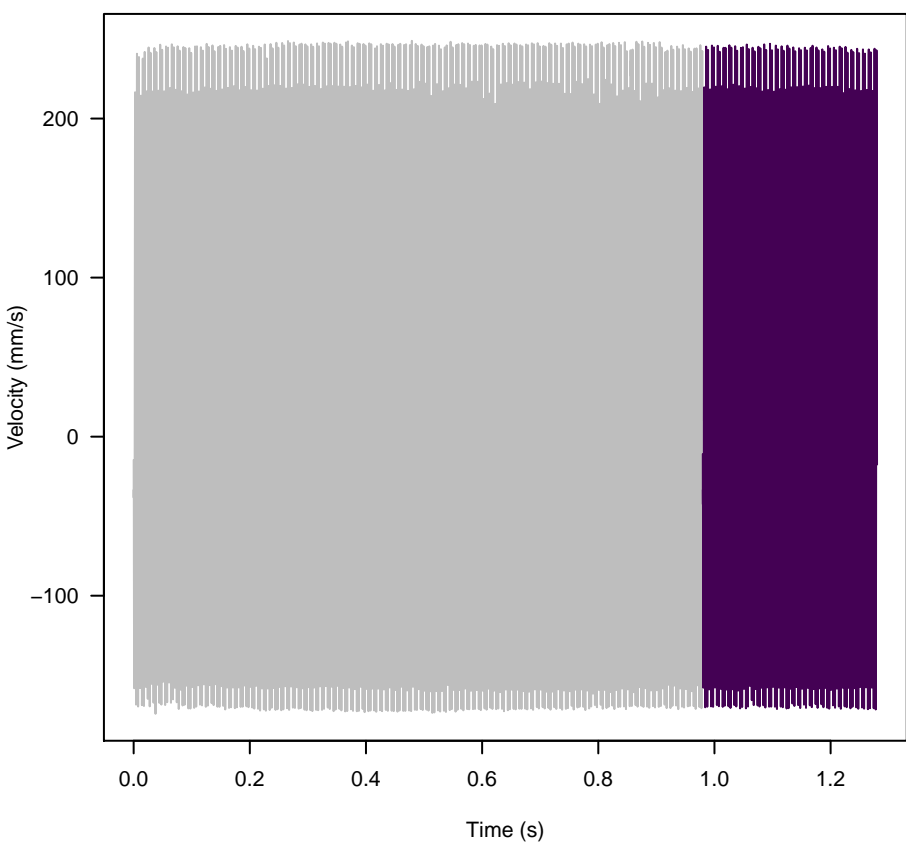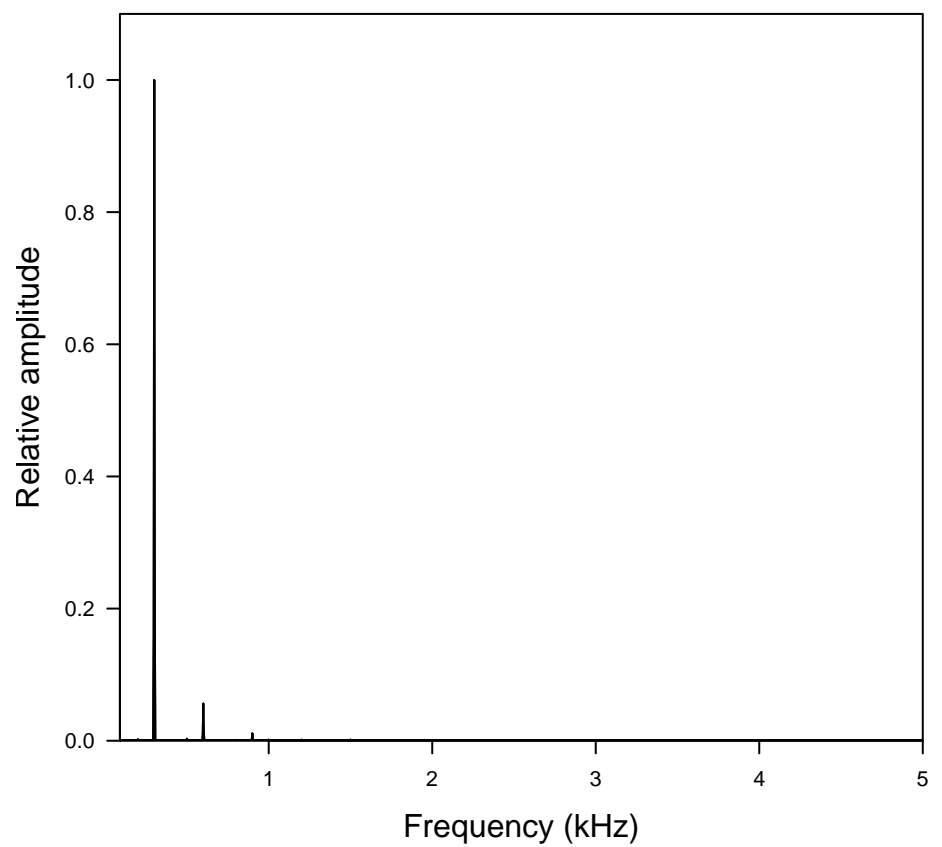

Vel. = 0.014 ; Str. = Receptacle ; Axis = z ; Fl. accession = 10-s-86

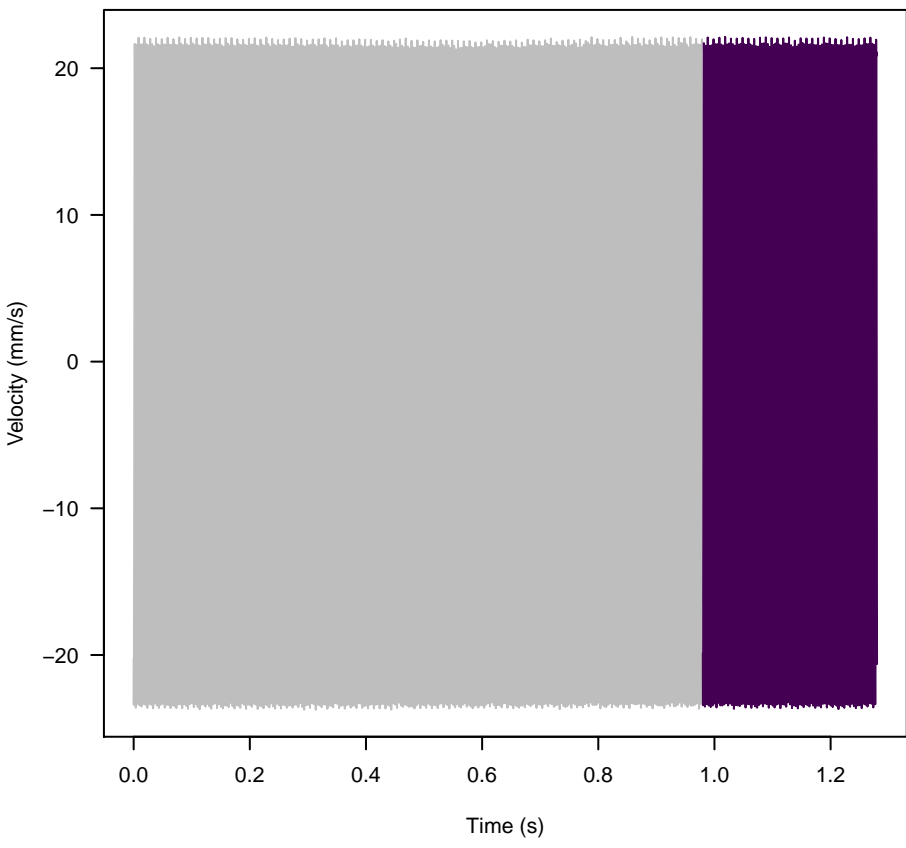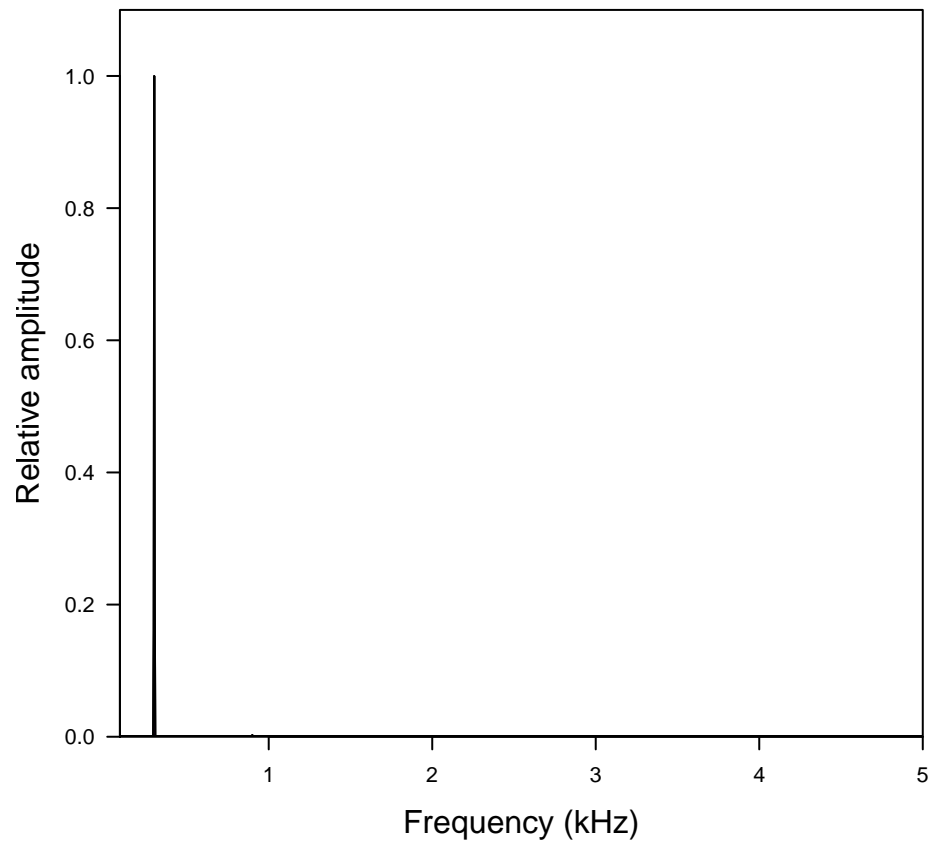

Vel. = 0.014 ; Str. = PA ; Axis = z ; Fl. accession = 10-s-86

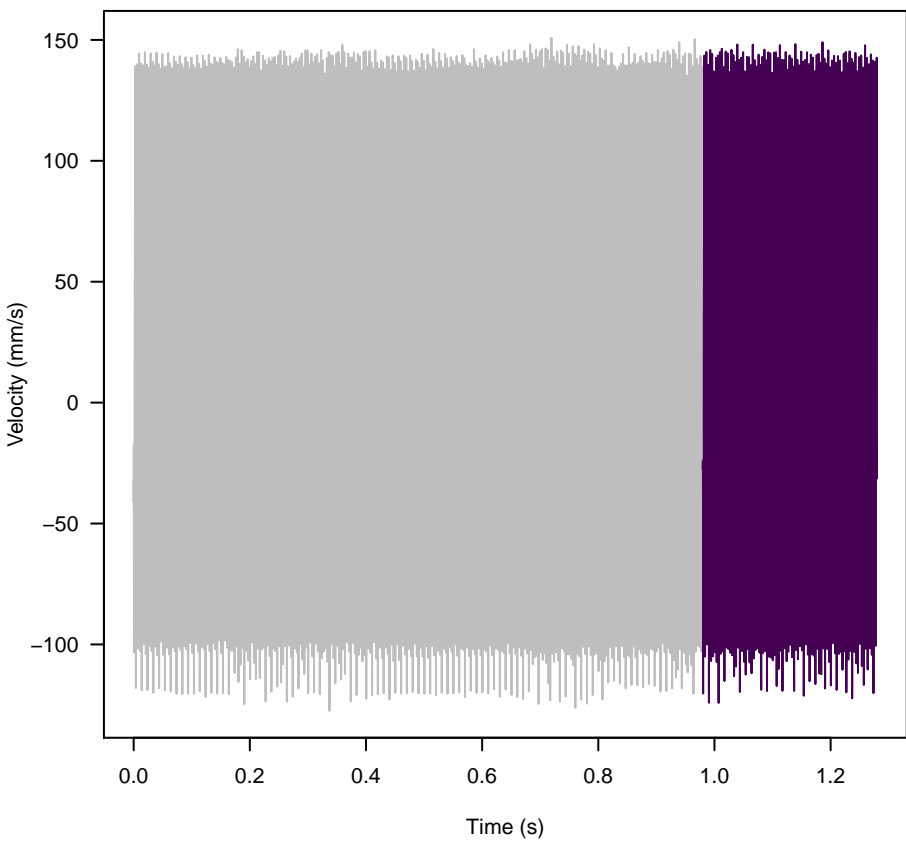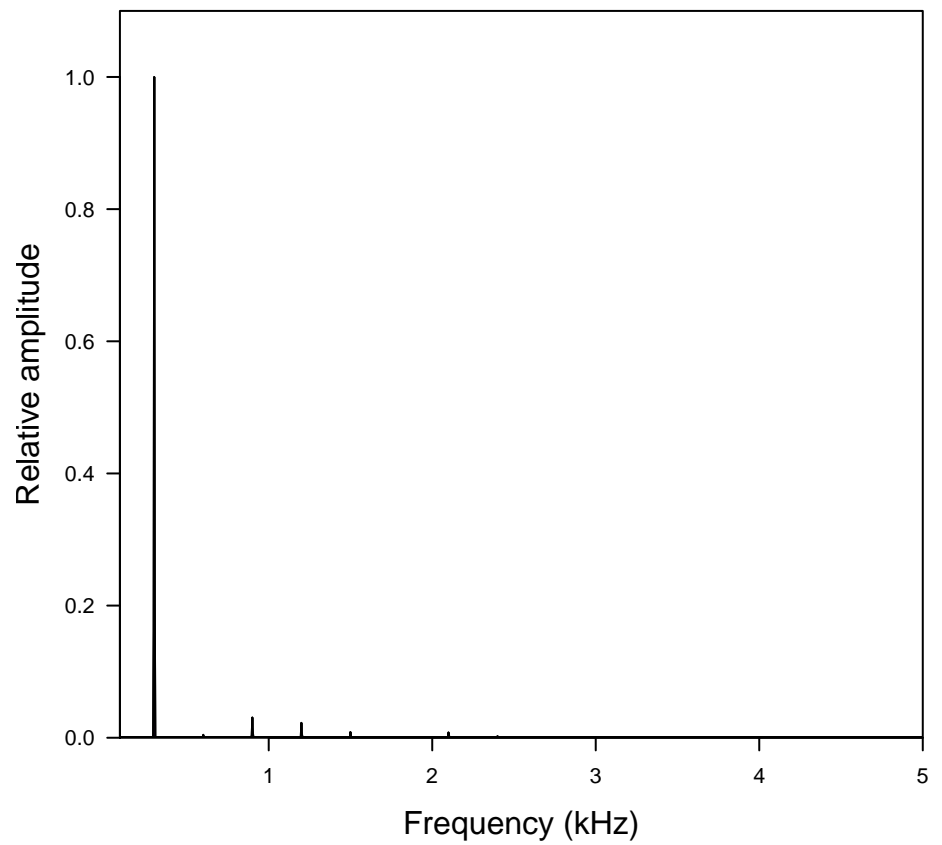

Vel. = 0.014 ; Str. = Receptacle ; Axis = z ; Fl. accession = 10-s-86

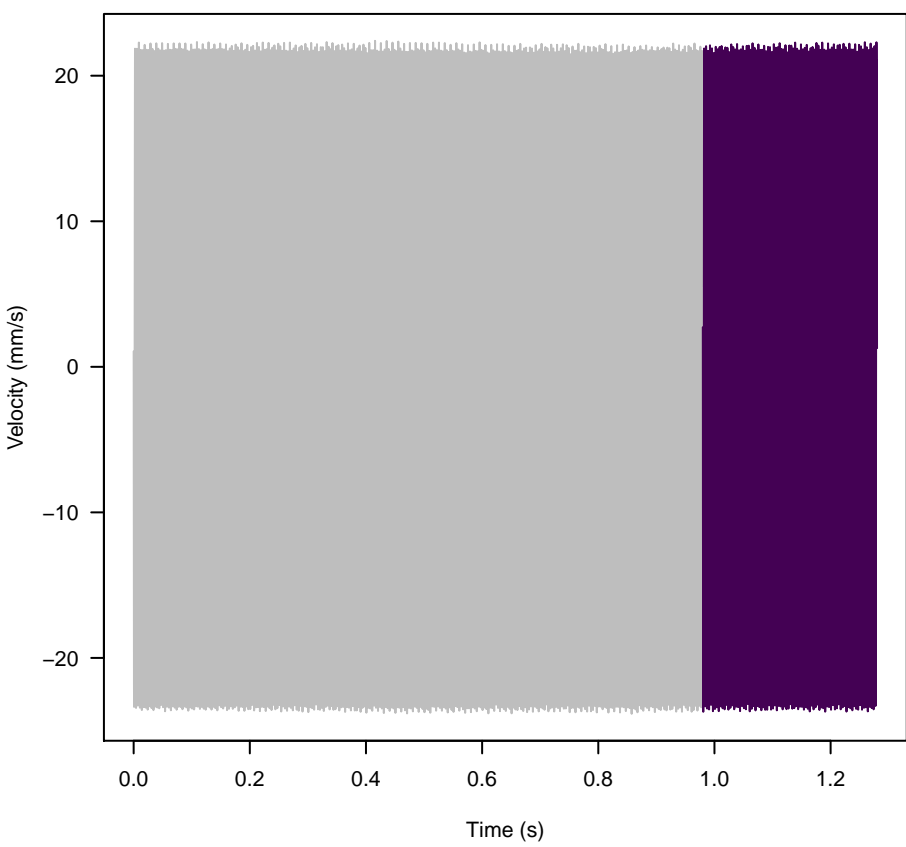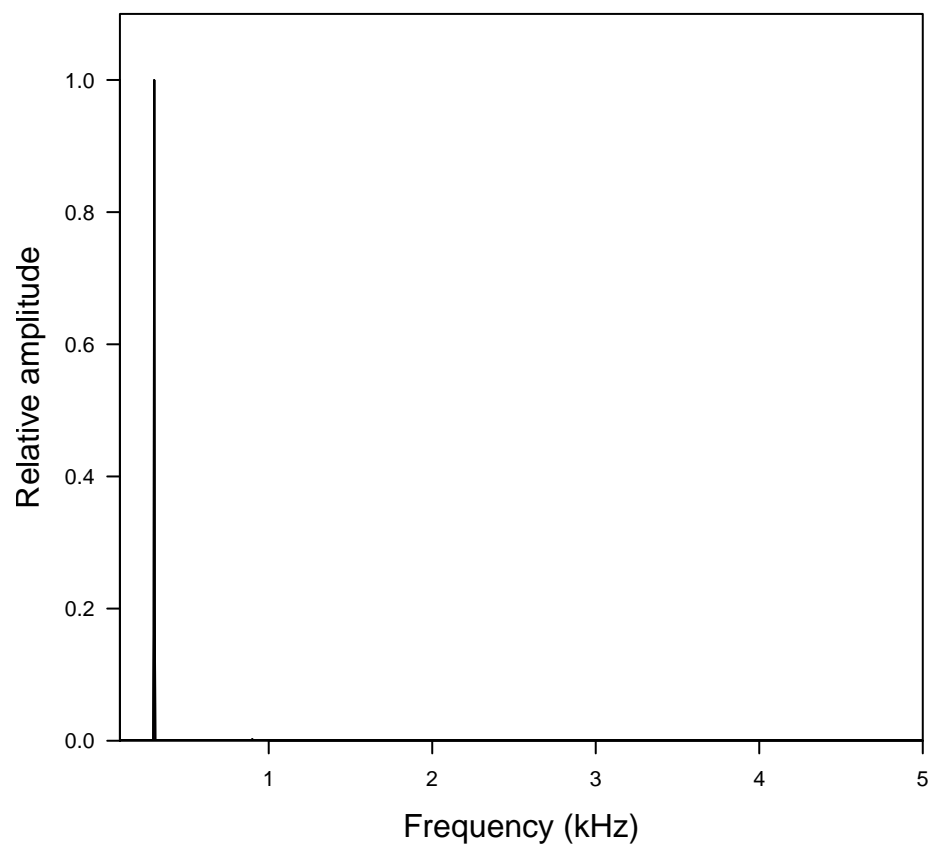

Vel. = 0.028 ; Str. = PA ; Axis = z ; Fl. accession = 10-s-86

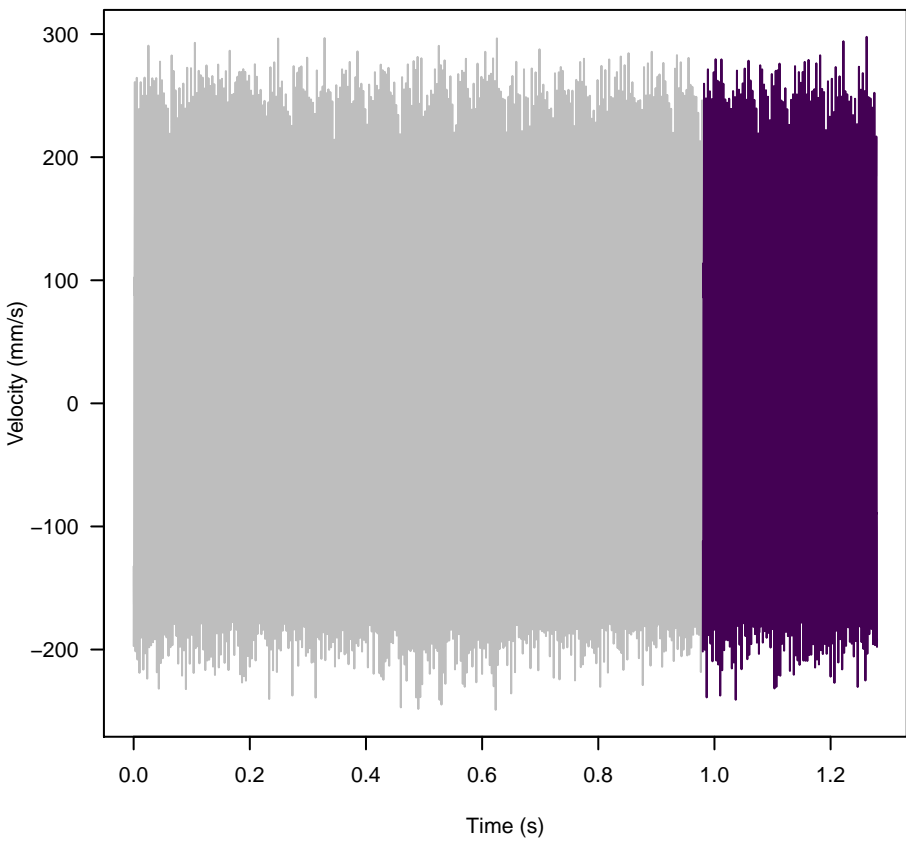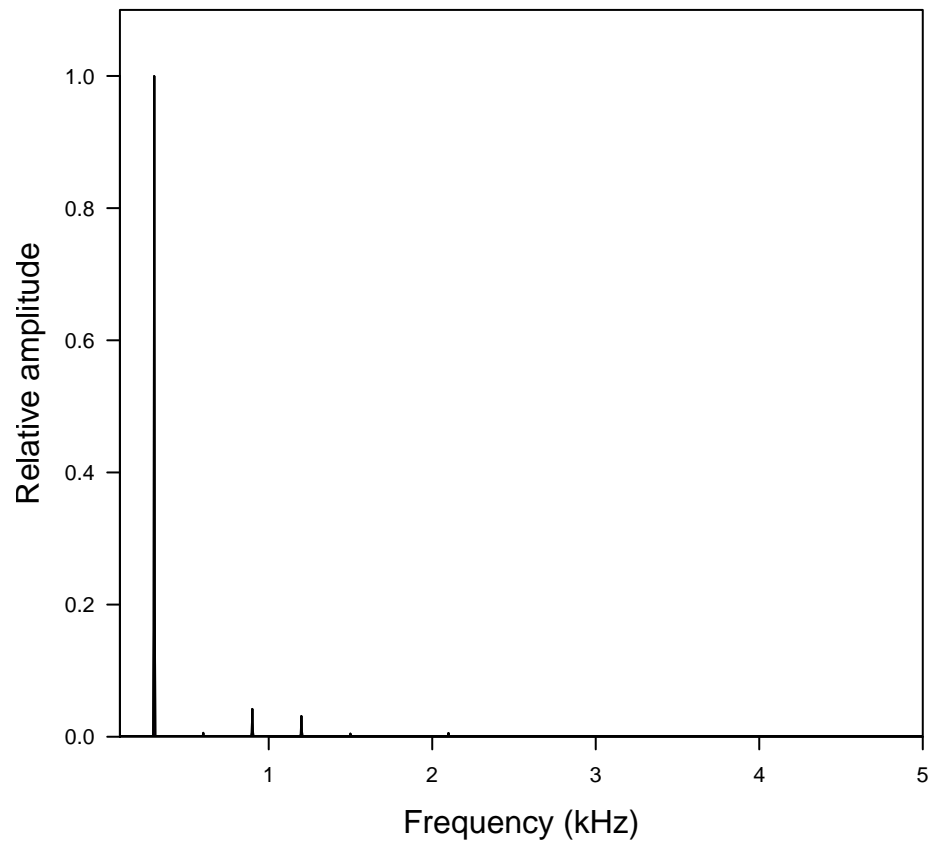

Vel. = 0.028 ; Str. = Receptacle ; Axis = z ; Fl. accession = 10-s-86

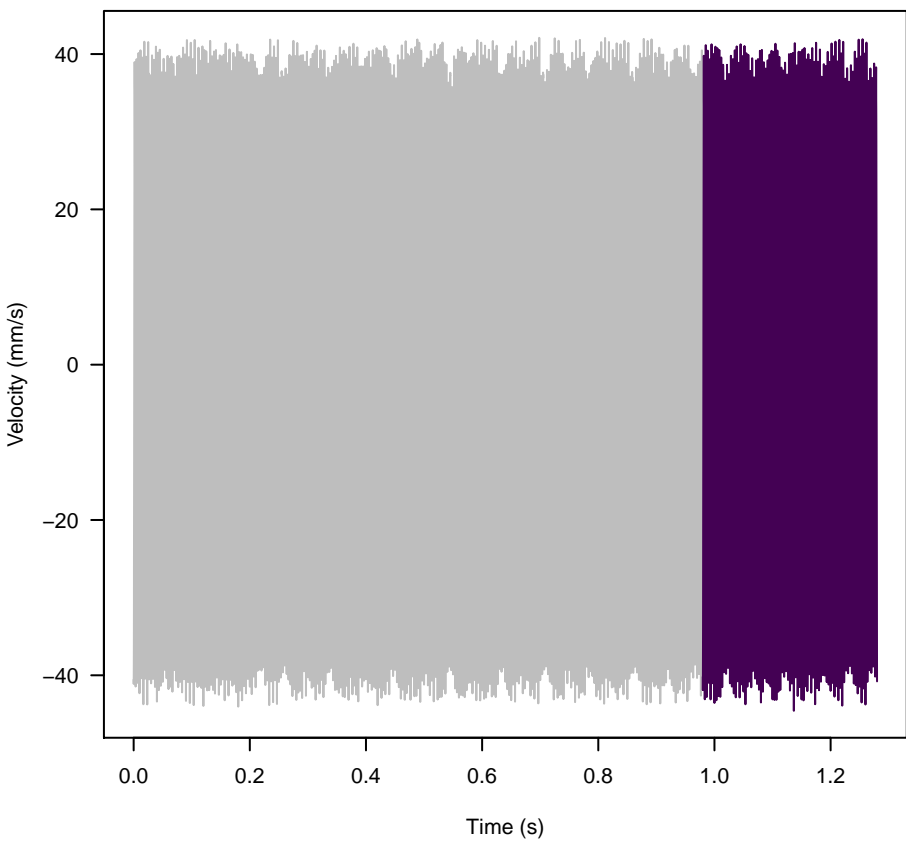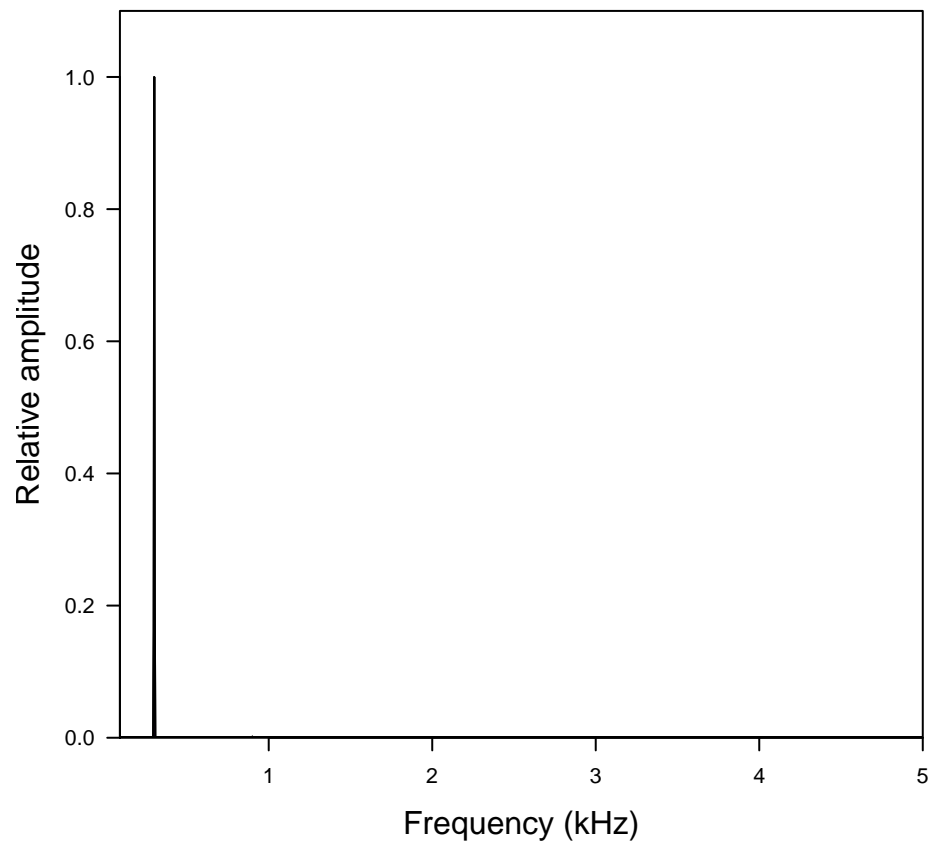

Vel. = 0.028 ; Str. = FA ; Axis = z ; Fl. accession = 10-s-86

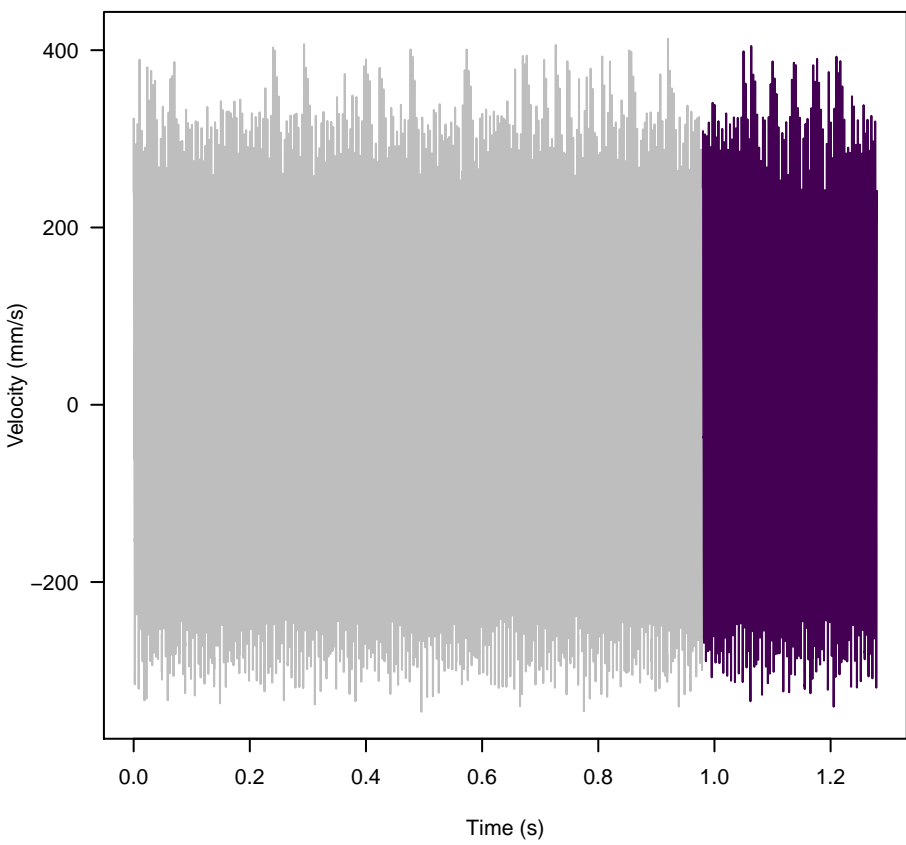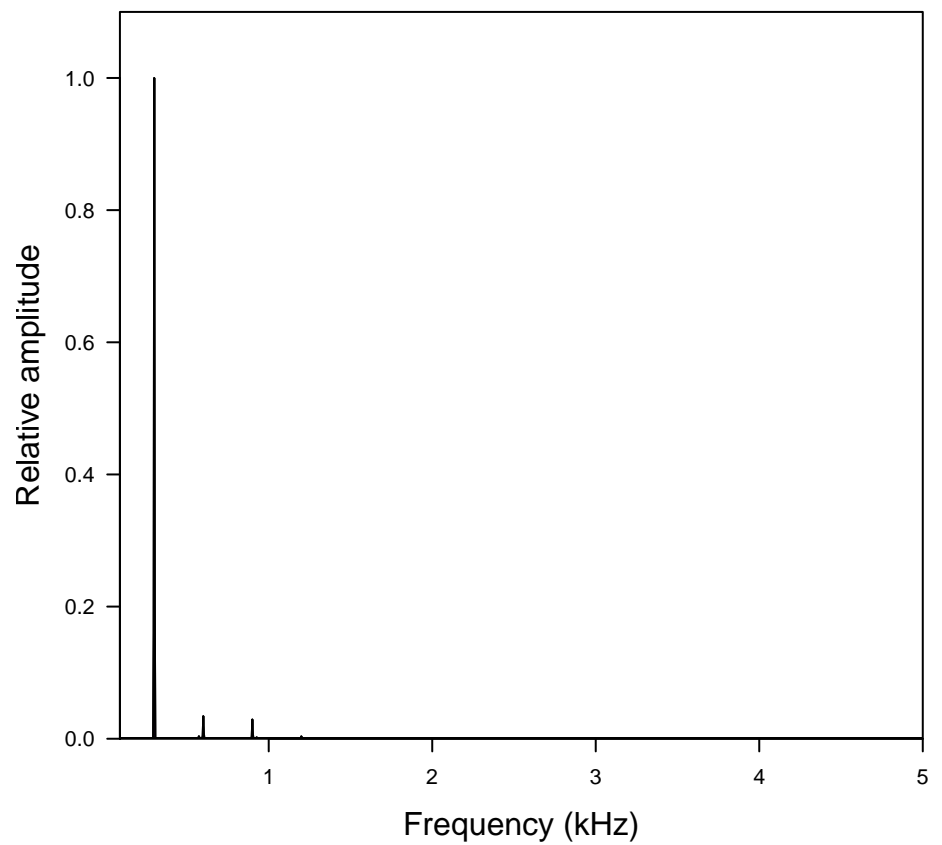

Vel. = 0.028 ; Str. = Receptacle ; Axis = z ; Fl. accession = 10-s-86

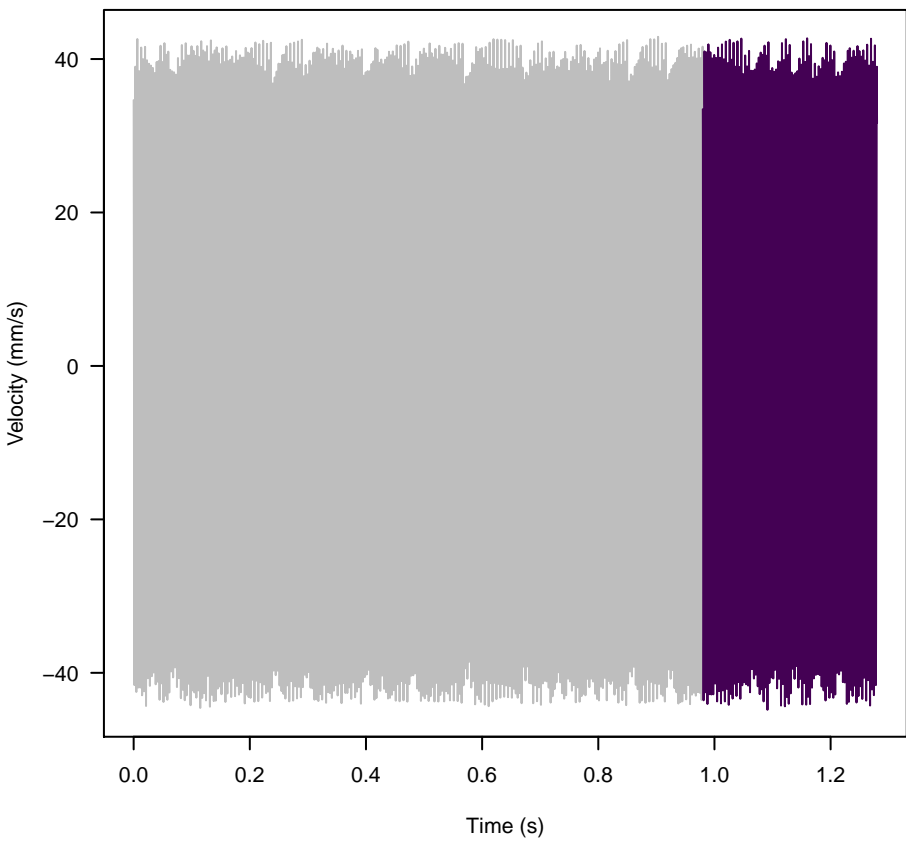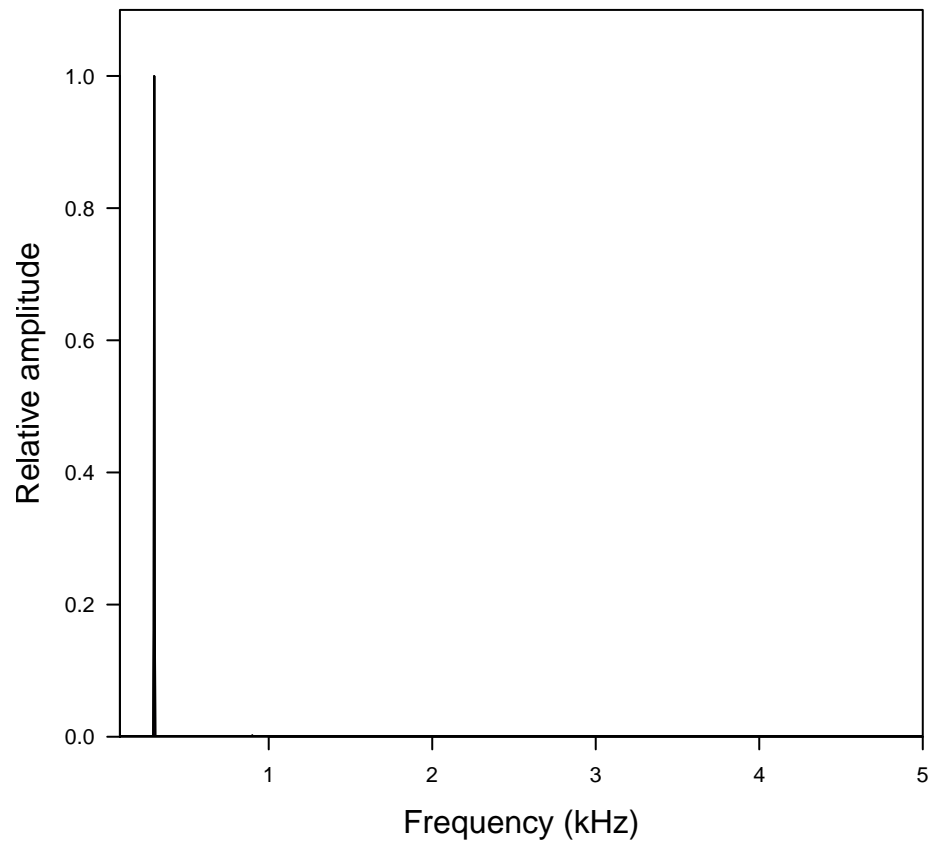

Vel. = 0.028 ; Str. = Corolla ; Axis = z ; Fl. accession = 10-s-86

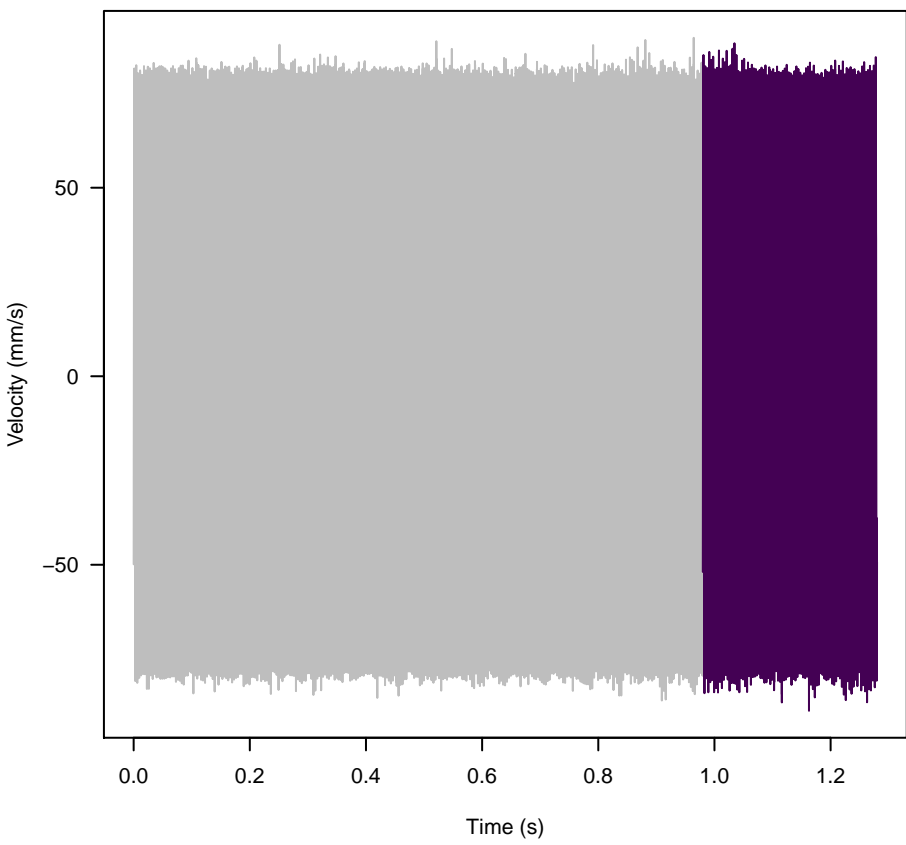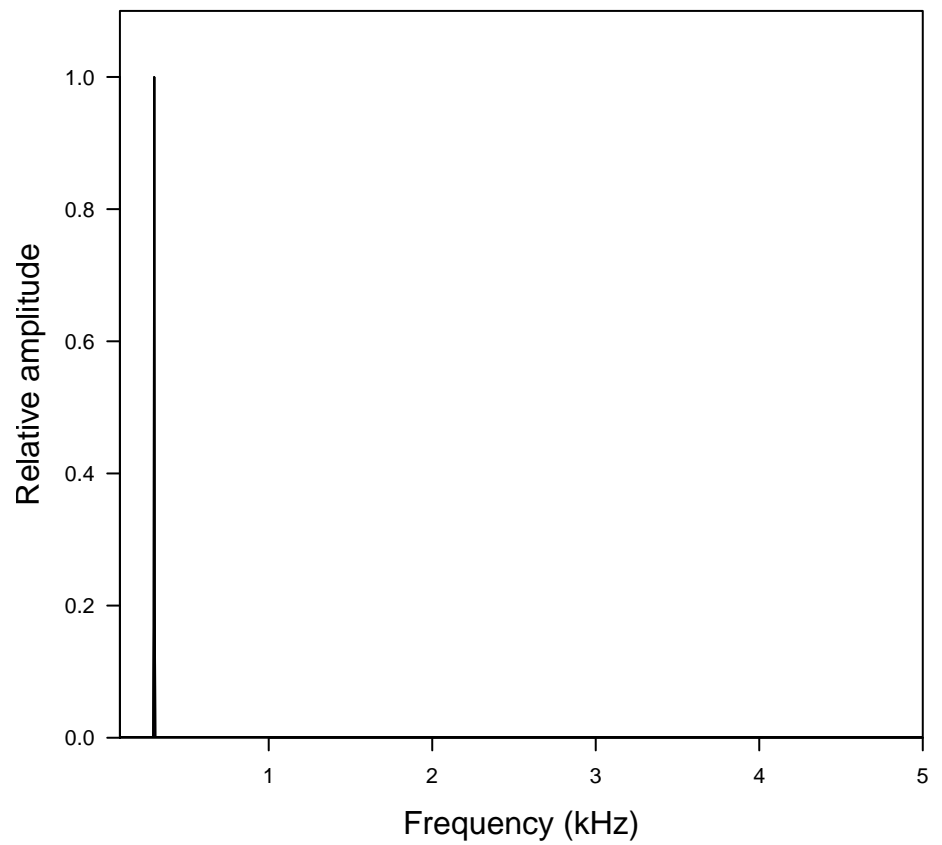

Vel. = 0.028 ; Str. = Receptacle ; Axis = z ; Fl. accession = 10-s-86

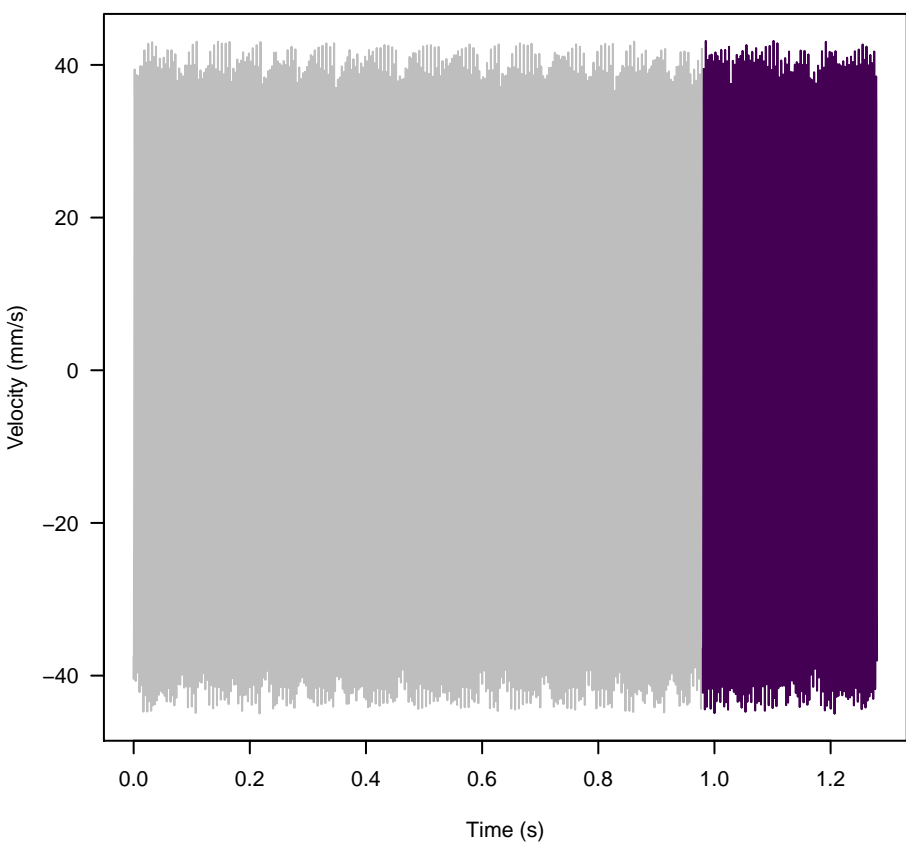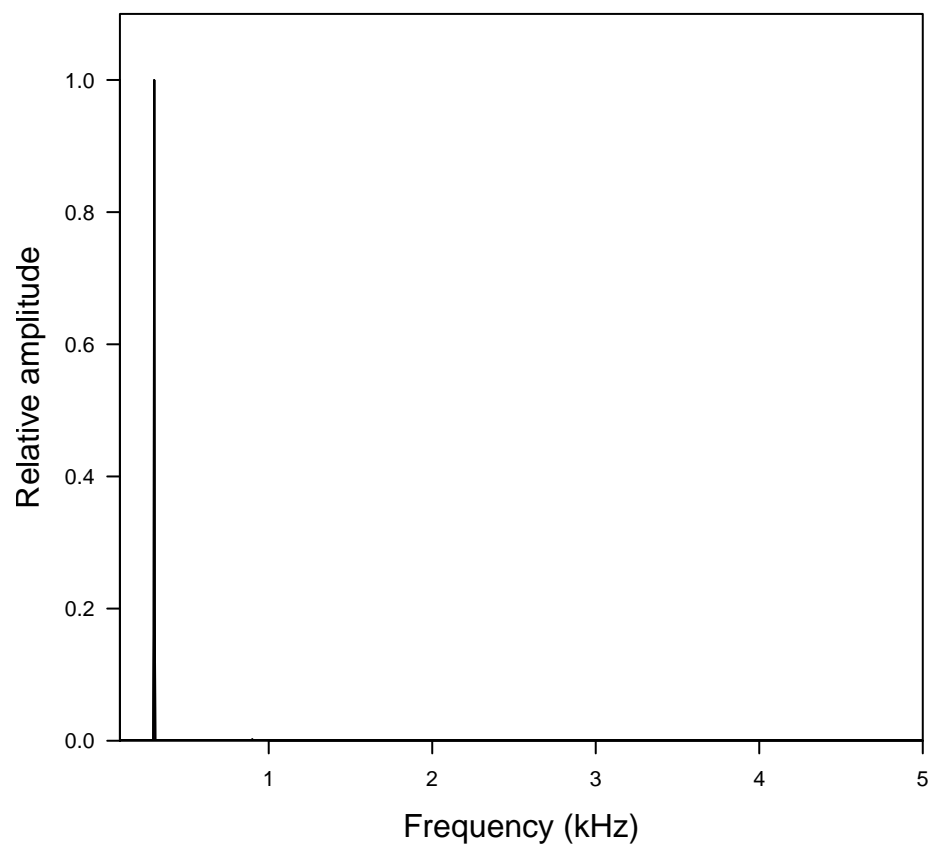

Vel. = 0.057 ; Str. = Corolla ; Axis = z ; Fl. accession = 10-s-86

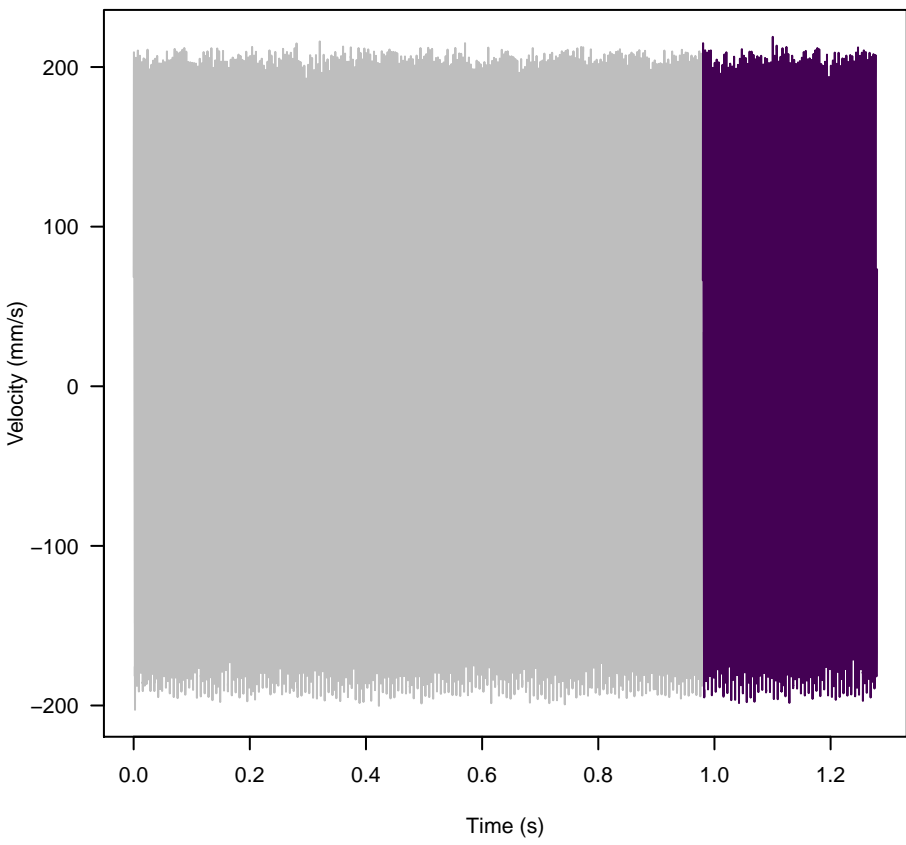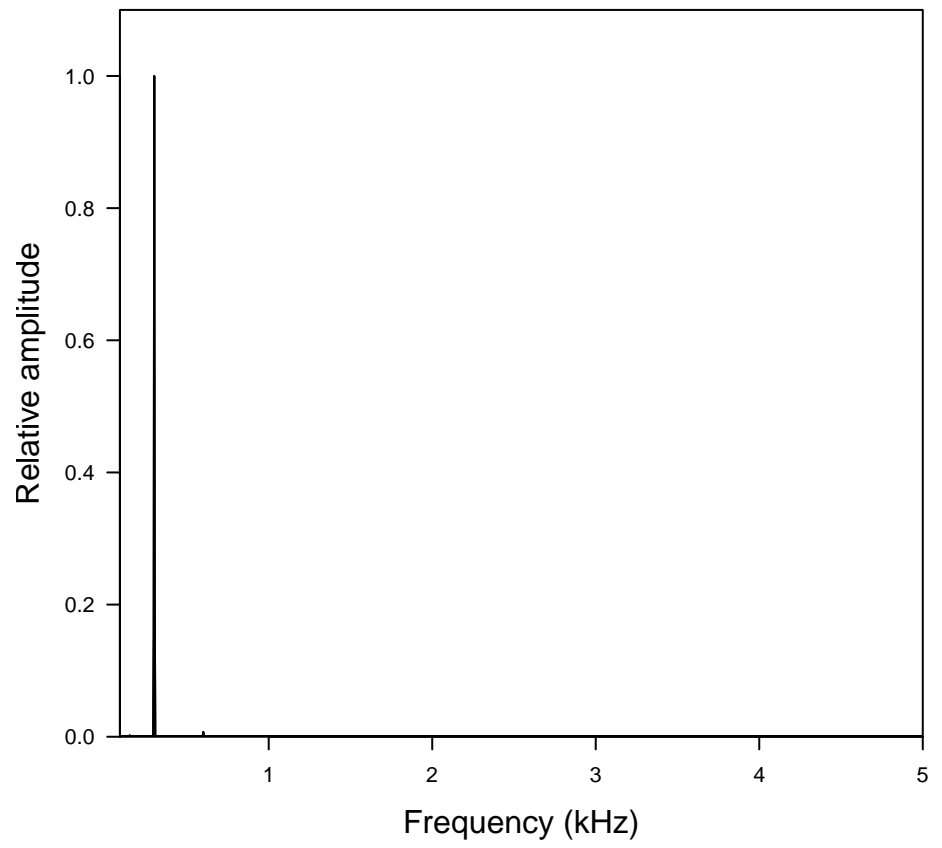

Vel. = 0.057 ; Str. = Receptacle ; Axis = z ; Fl. accession = 10-s-86

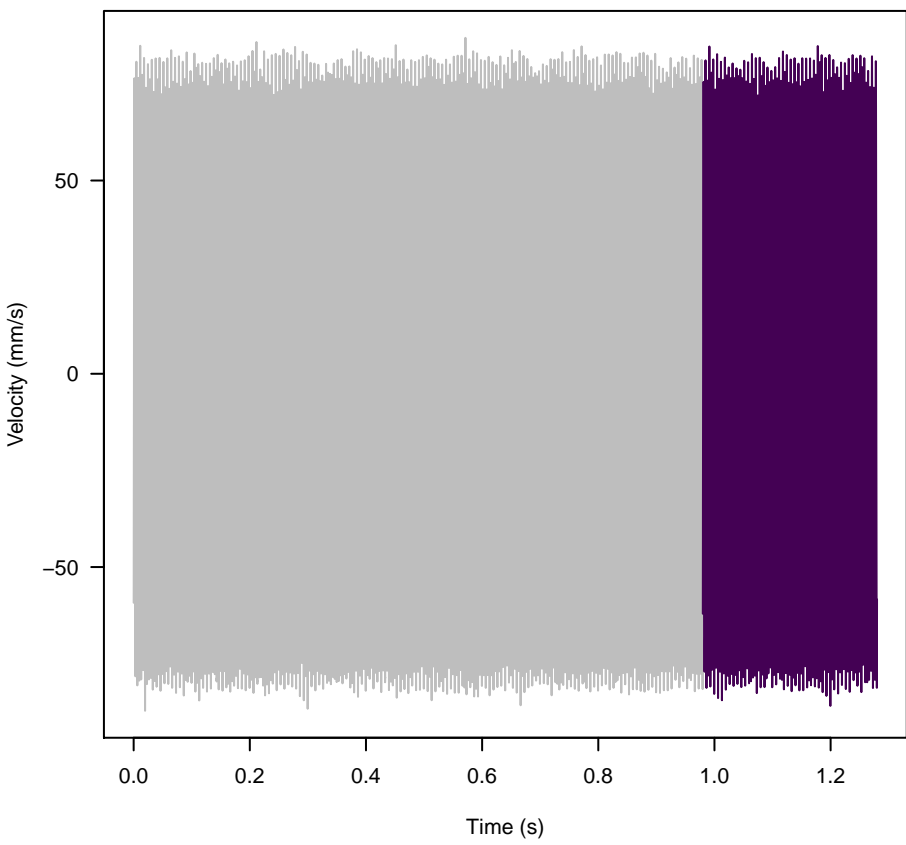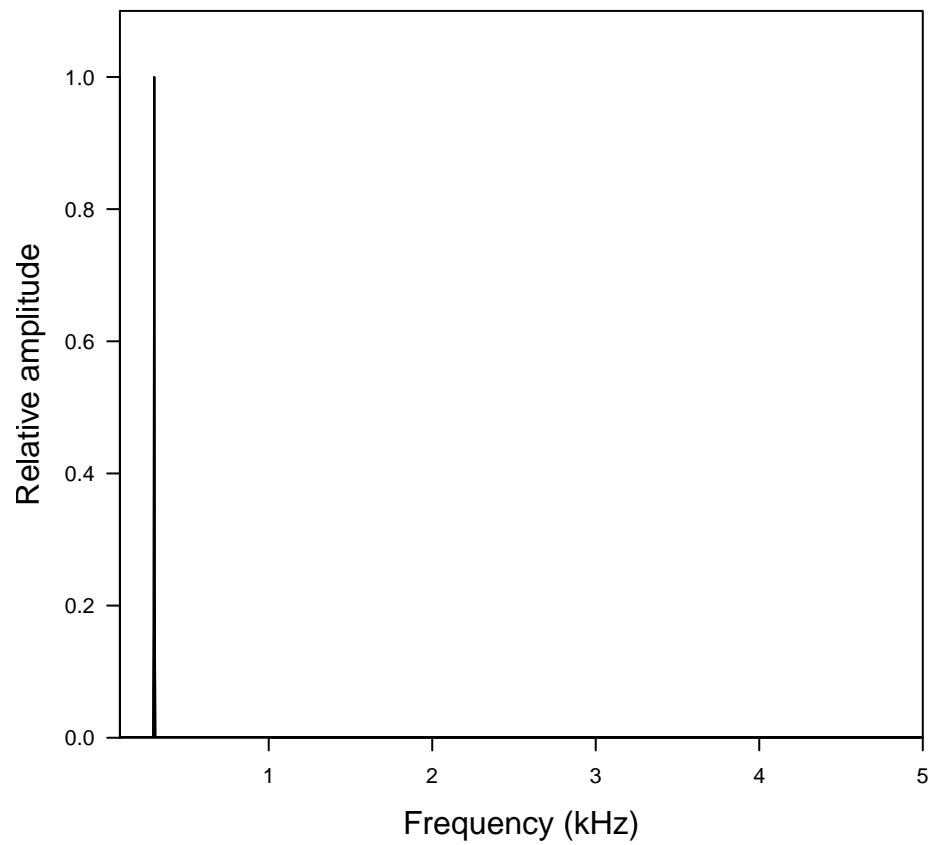

Vel. = 0.057 ; Str. = FA ; Axis = z ; Fl. accession = 10-s-86

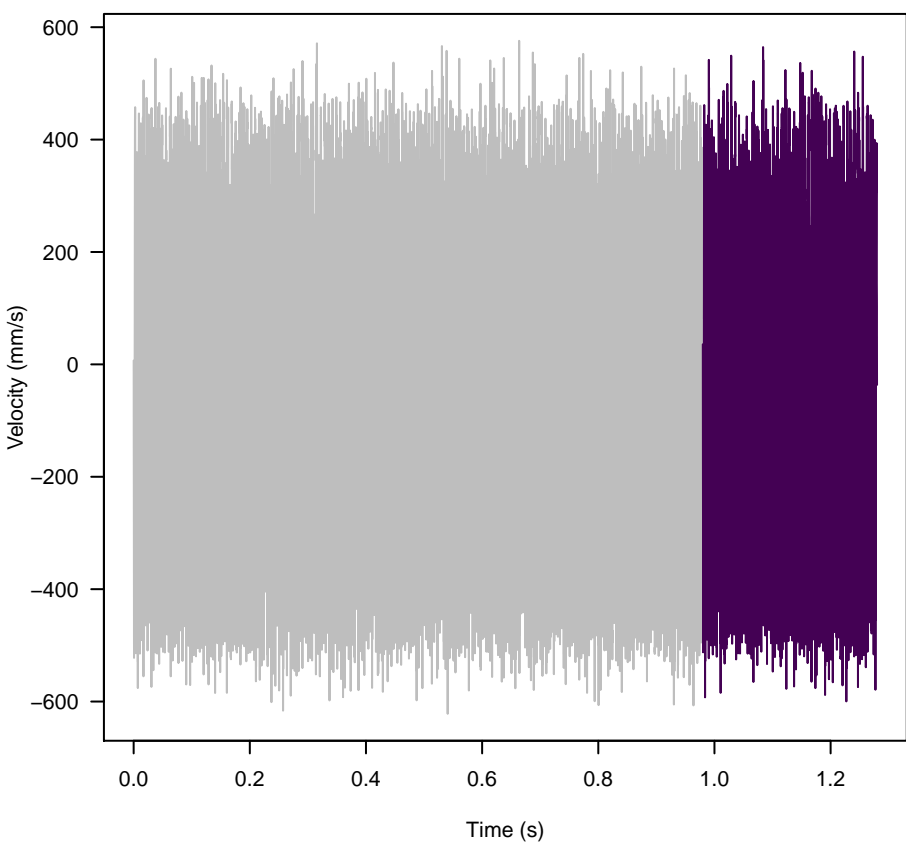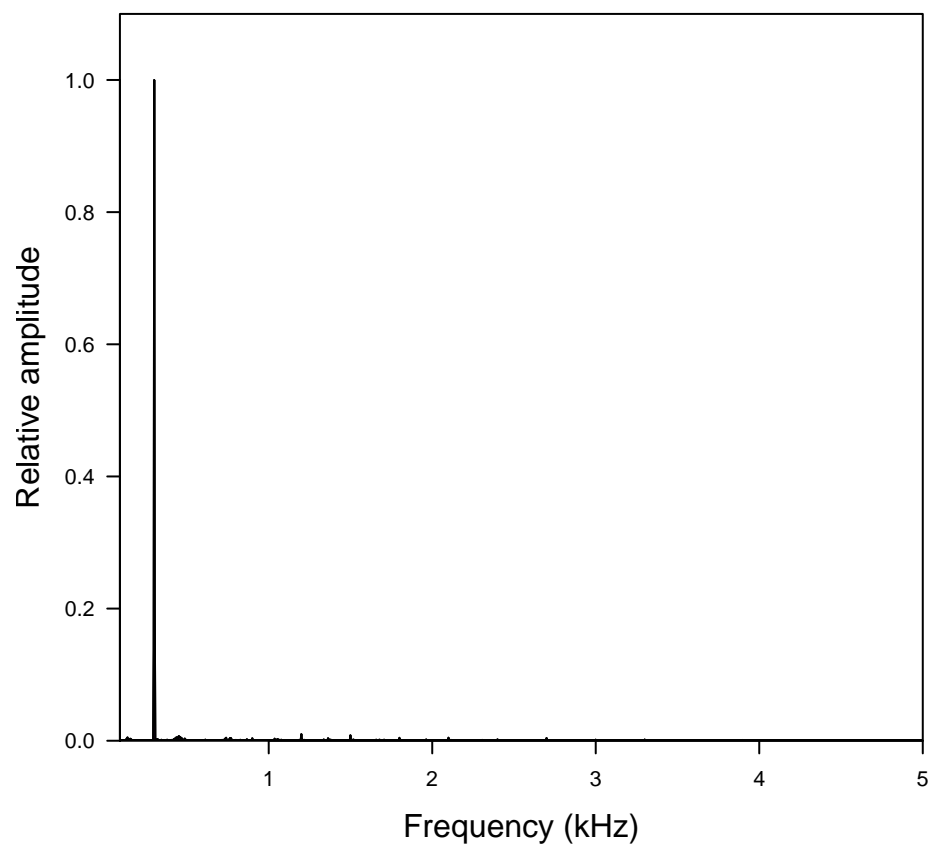

Vel. = 0.057 ; Str. = Receptacle ; Axis = z ; Fl. accession = 10-s-86

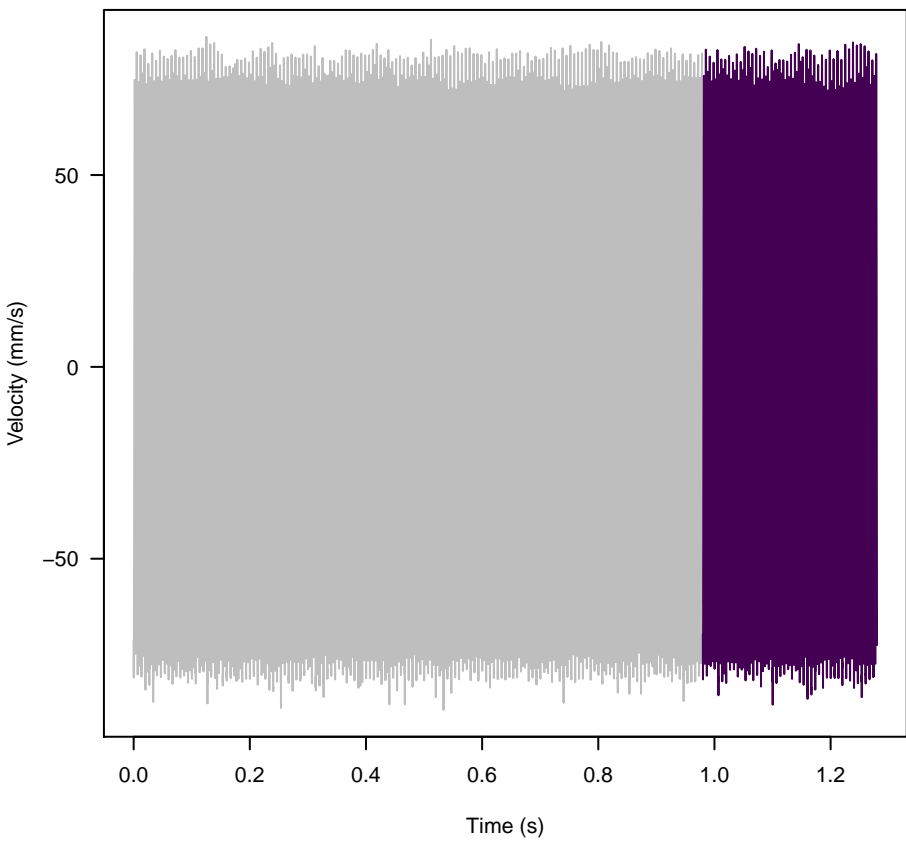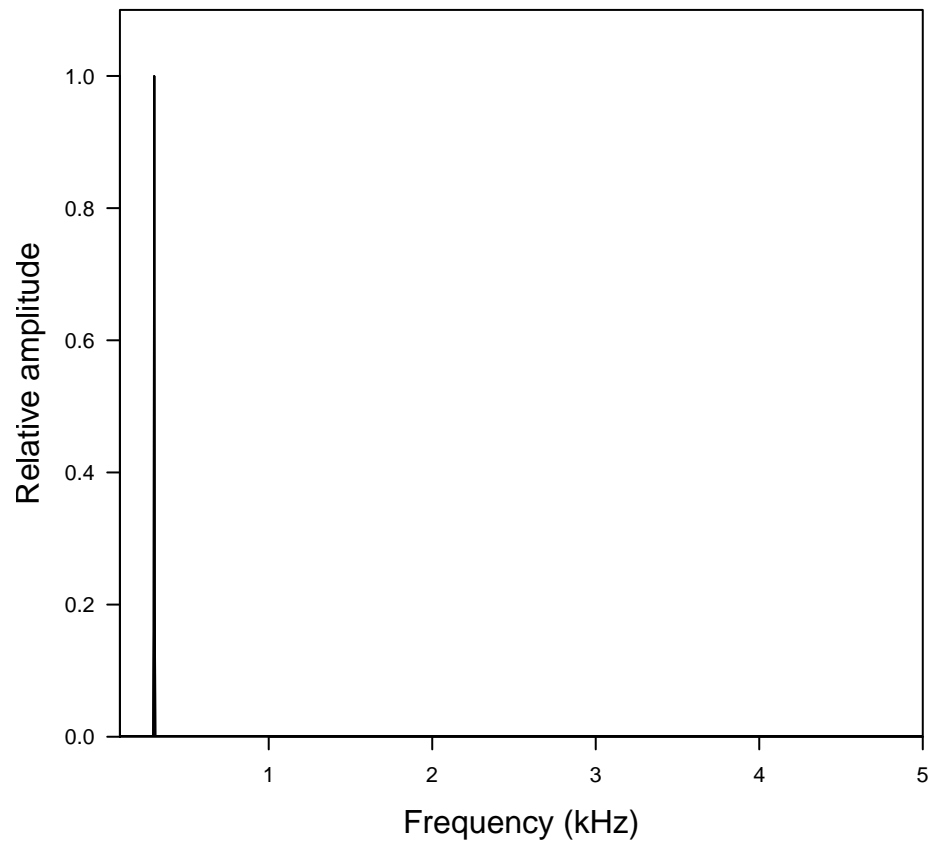

Vel. = 0.057 ; Str. = PA ; Axis = z ; Fl. accession = 10-s-86

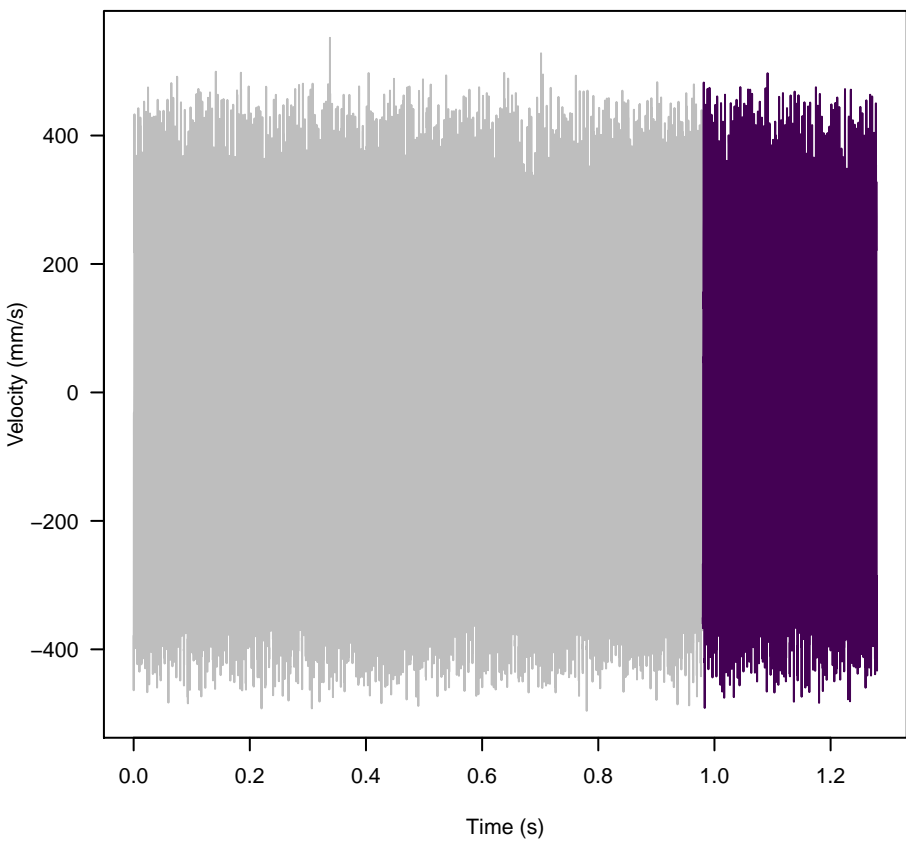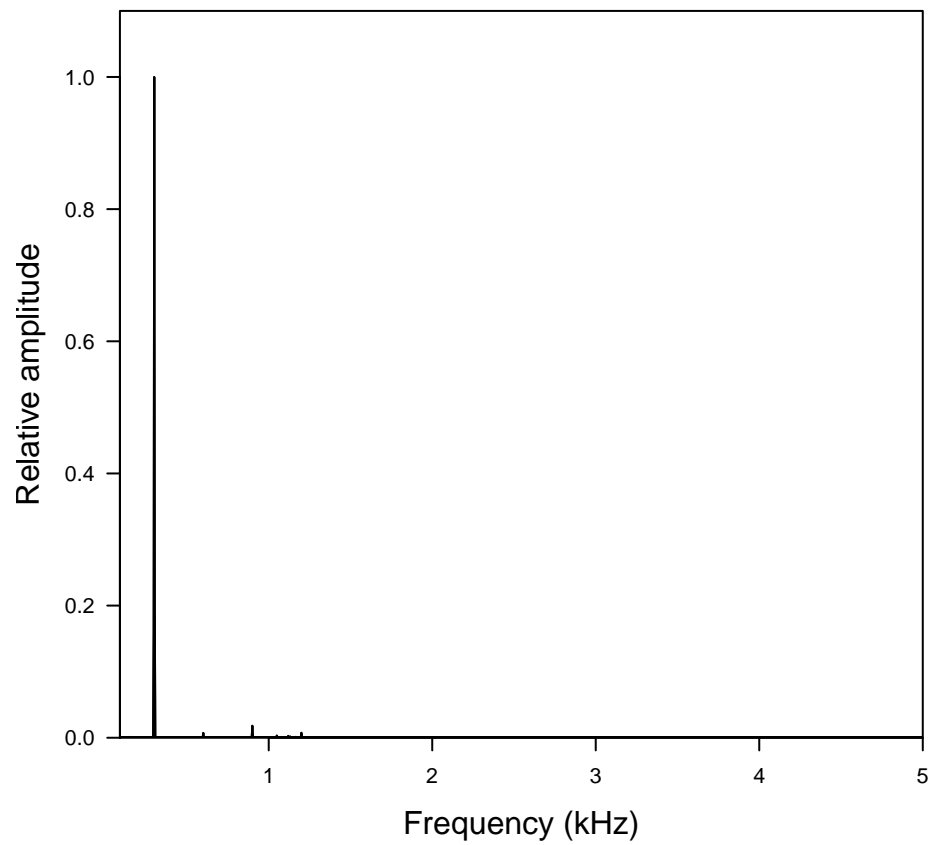

Vel. = 0.057 ; Str. = Receptacle ; Axis = z ; Fl. accession = 10-s-86

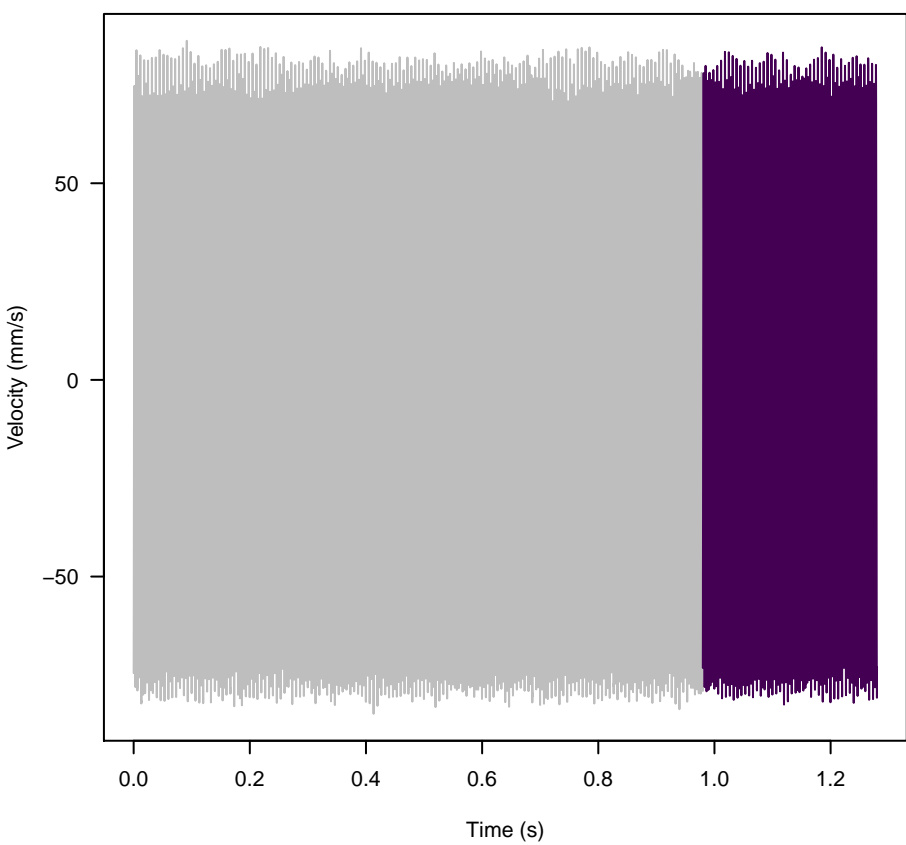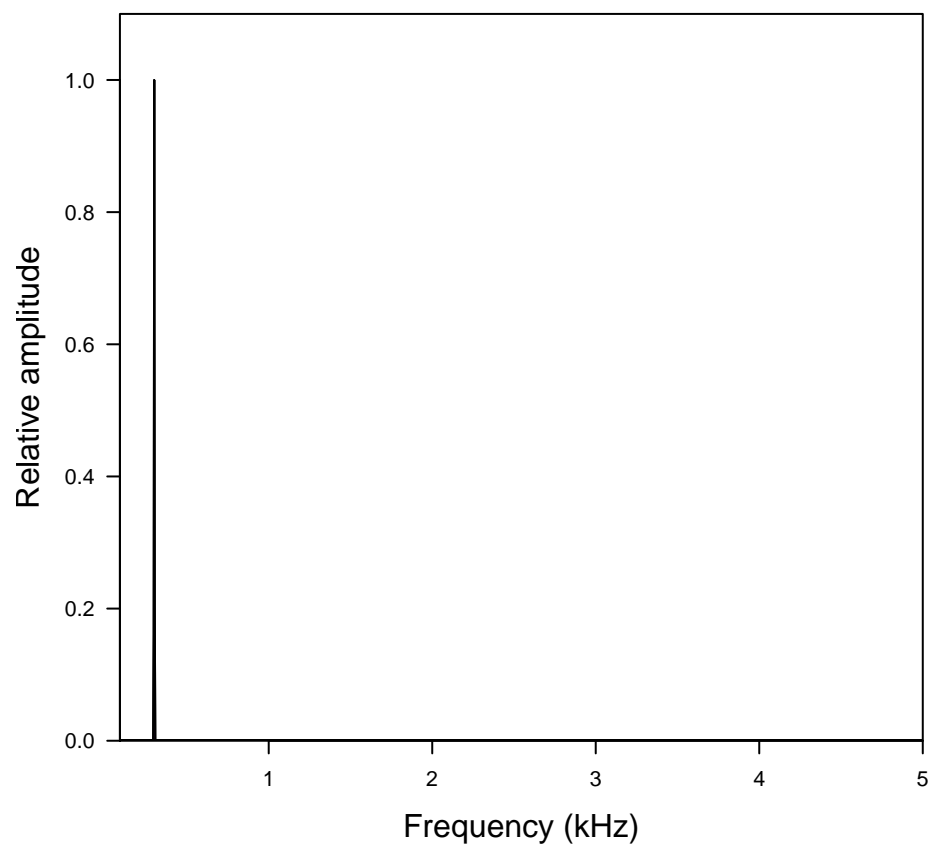

Vel. = 0.014 ; Str. = Corolla ; Axis = x ; Fl. accession = 10-s-86

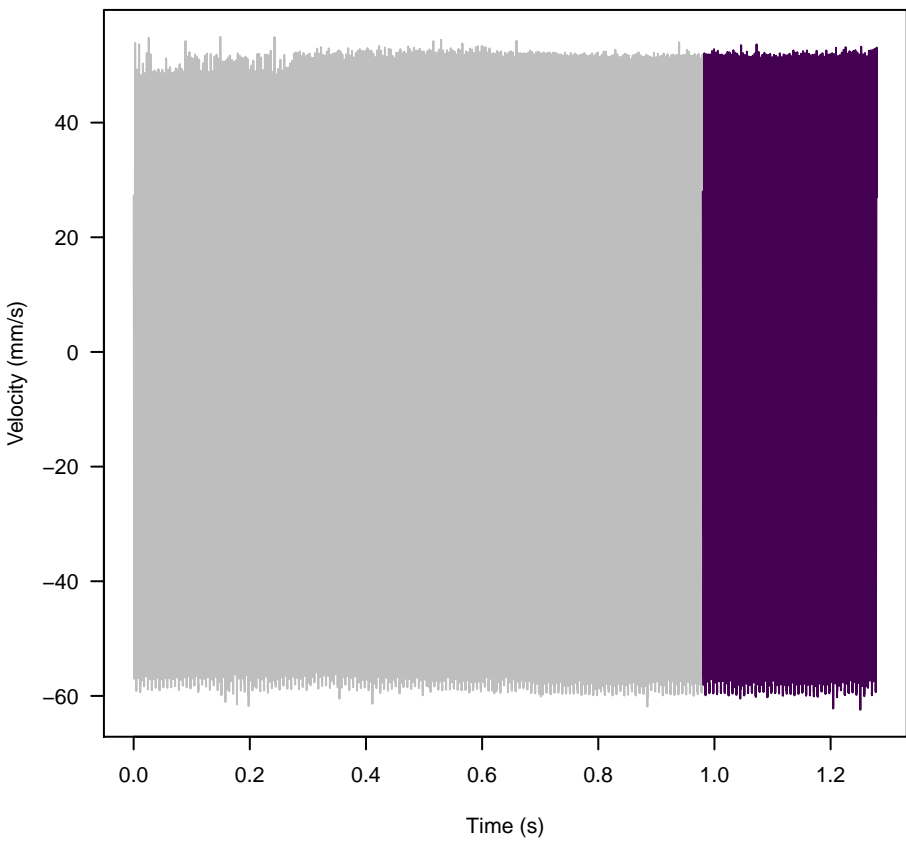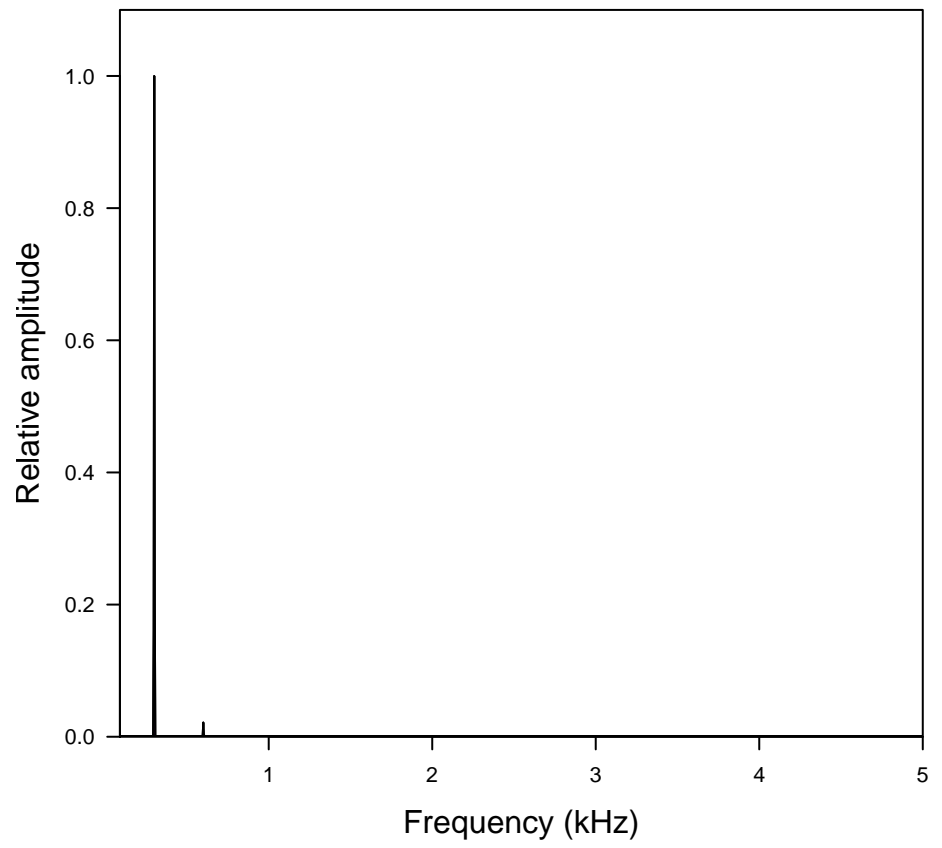

Vel. = 0.014 ; Str. = Receptacle ; Axis = x ; Fl. accession = 10-s-86

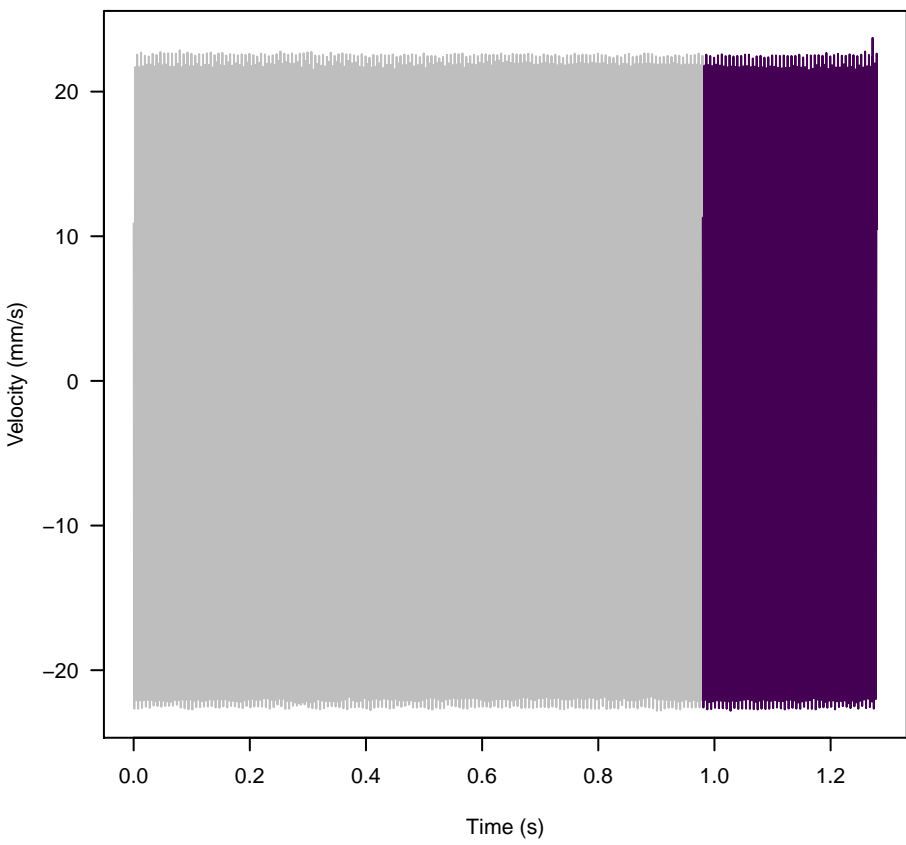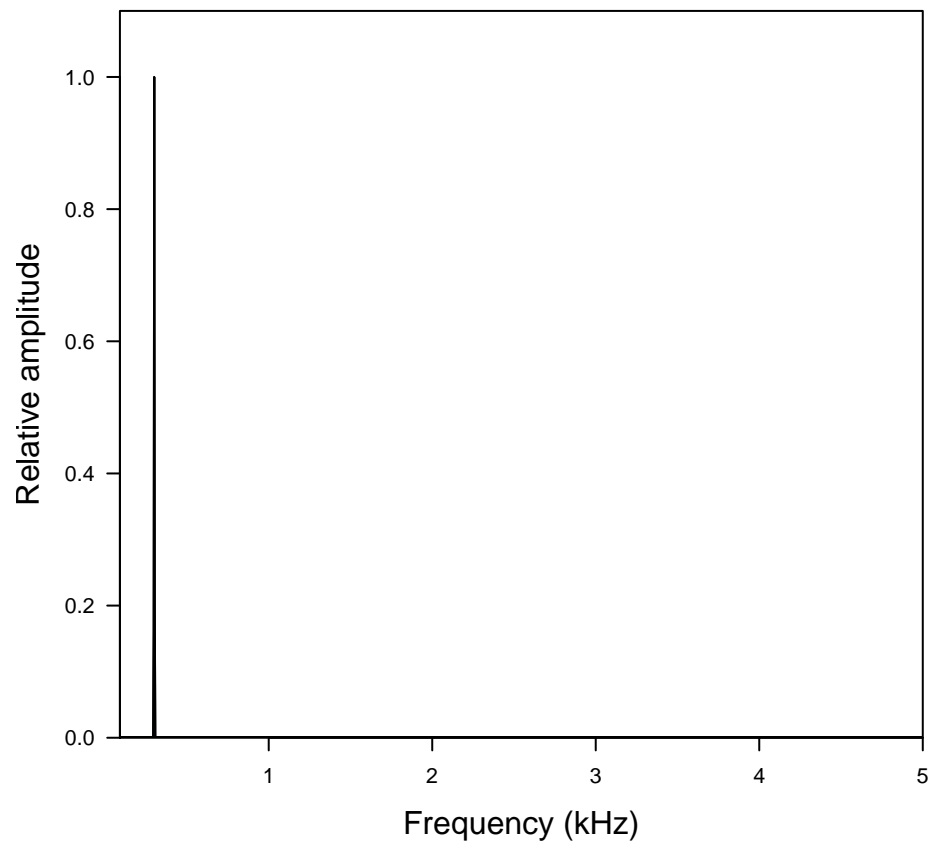

Vel. = 0.014 ; Str. = FA ; Axis = x ; Fl. accession = 10-s-86

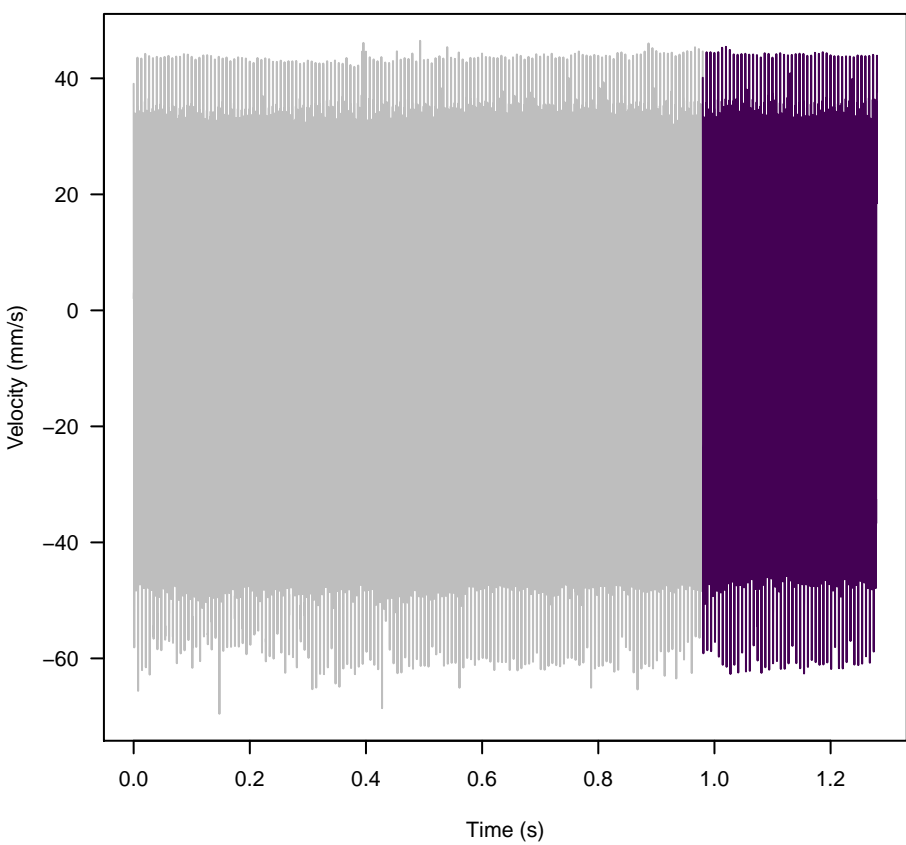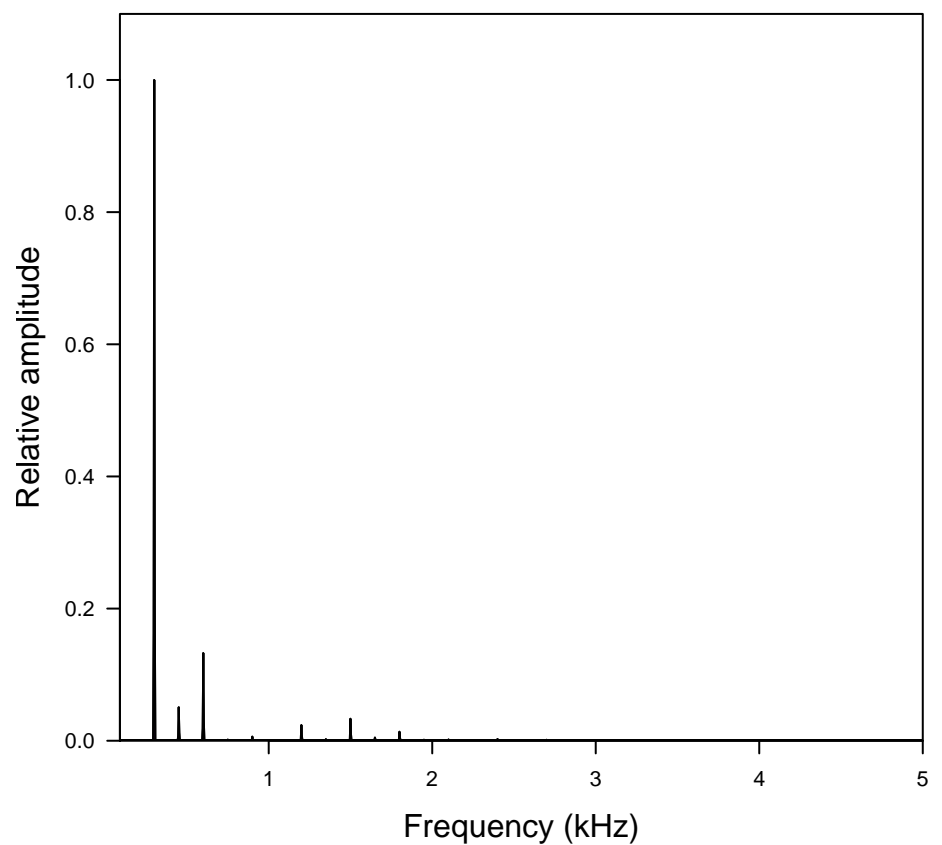

Vel. = 0.014 ; Str. = Receptacle ; Axis = x ; Fl. accession = 10-s-86

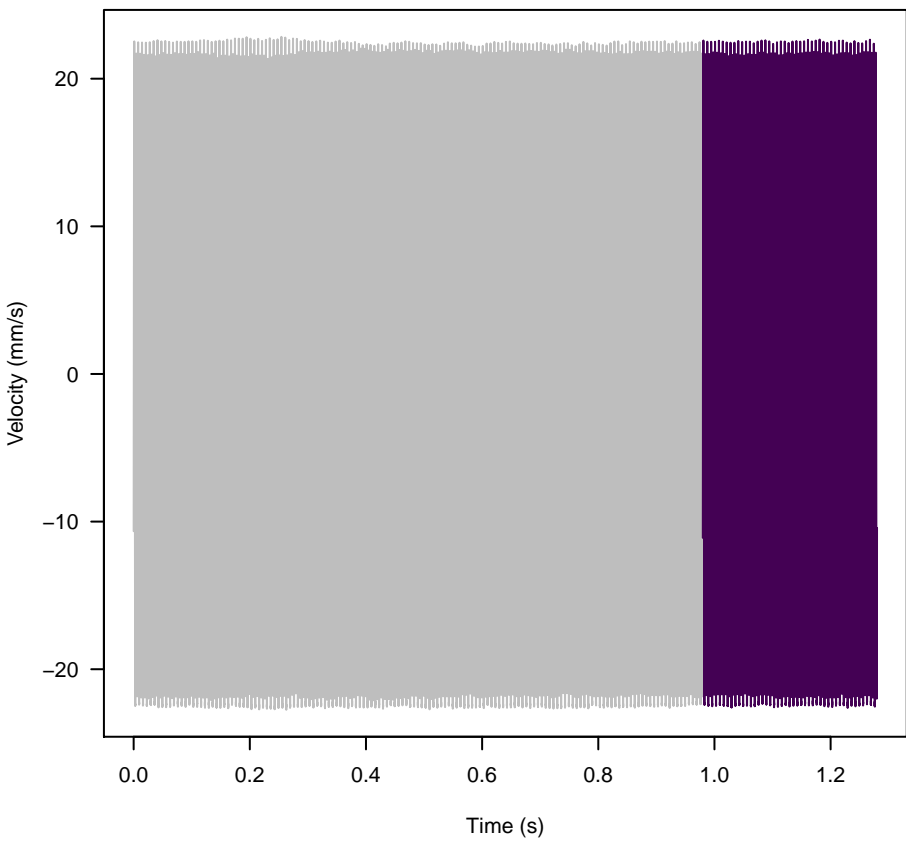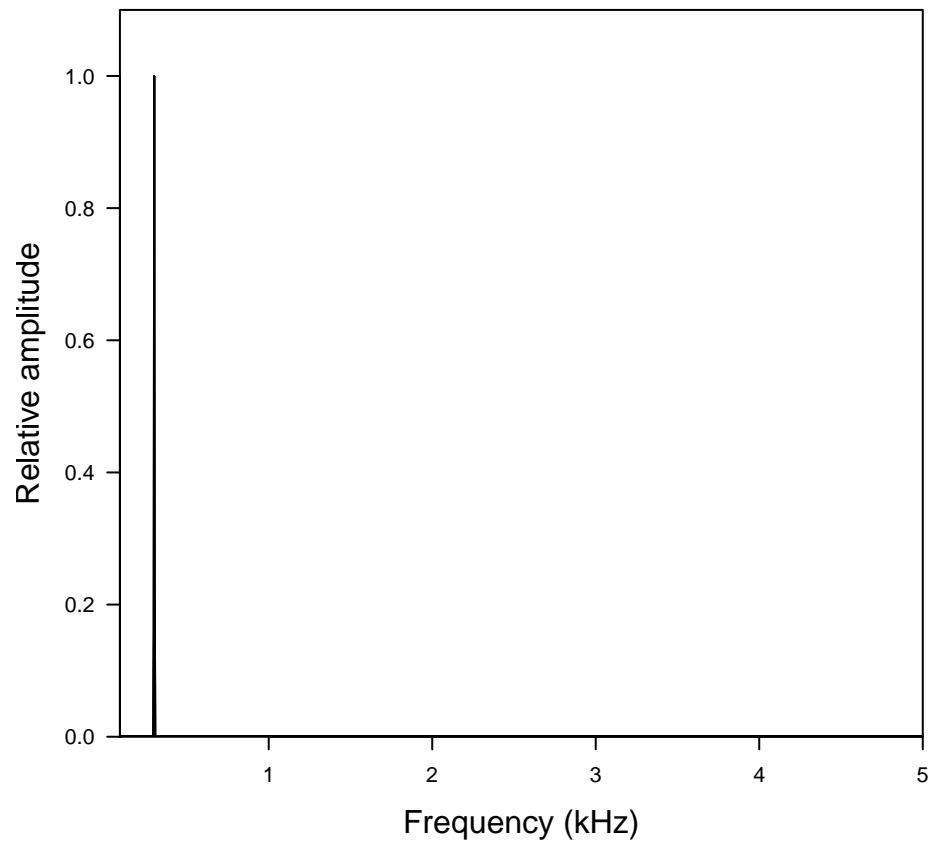

Vel. = 0.014 ; Str. = PA ; Axis = x ; Fl. accession = 10-s-86

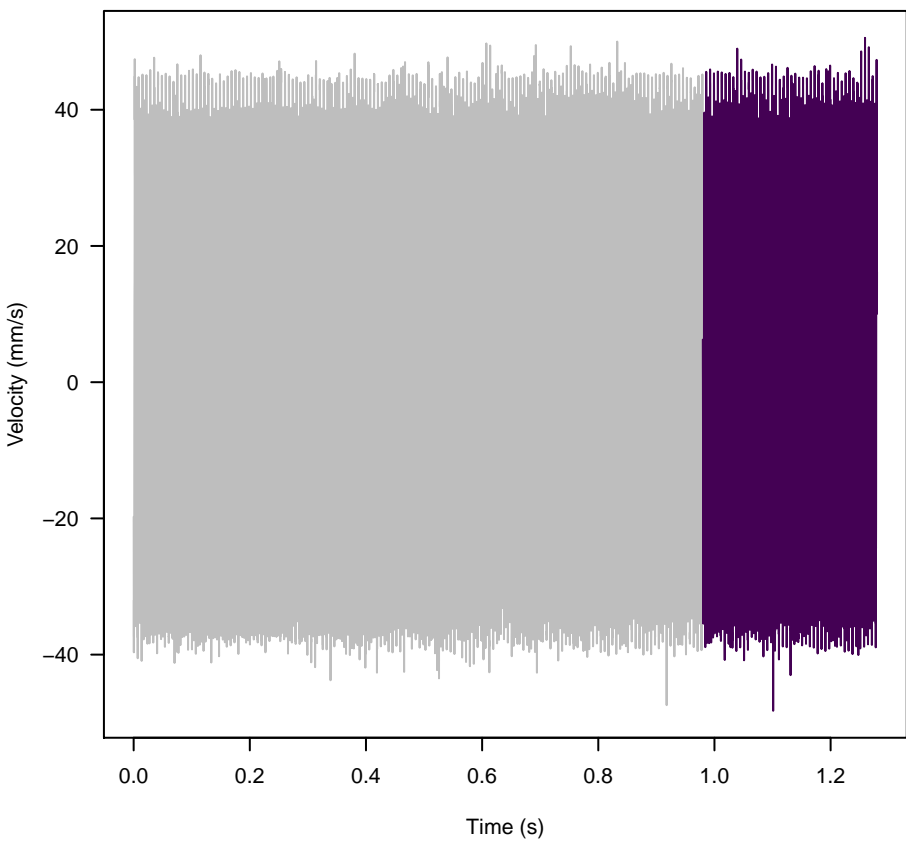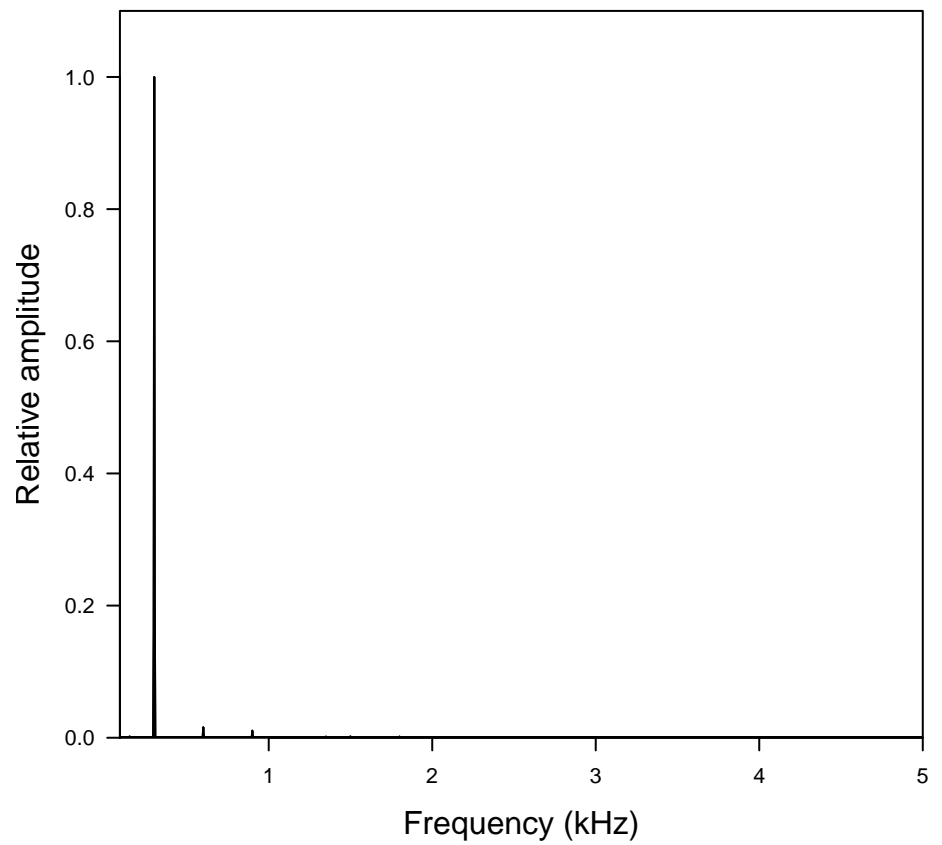

Vel. = 0.014 ; Str. = Receptacle ; Axis = x ; Fl. accession = 10-s-86

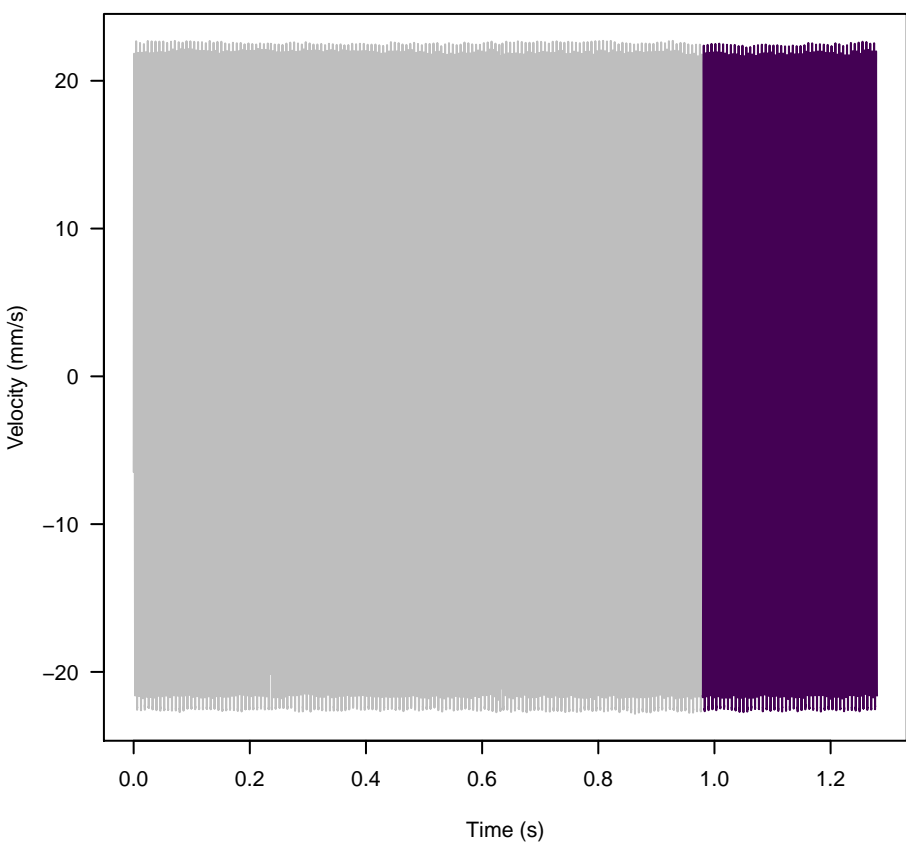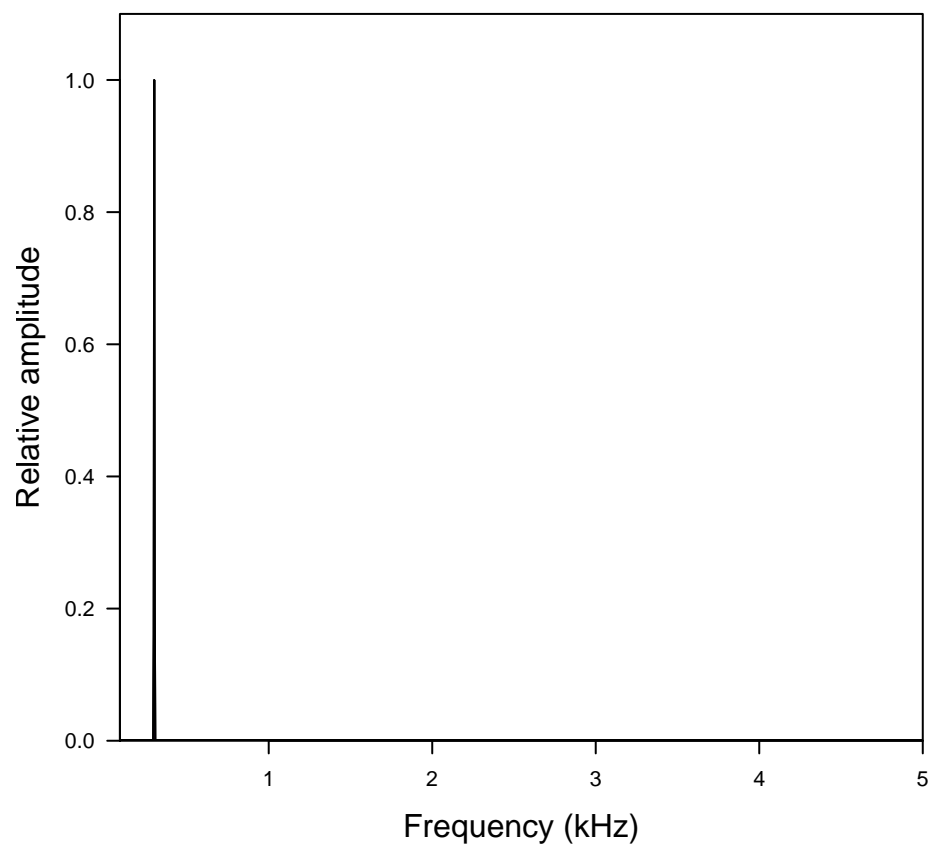



Vel. = 0.028 ; Str. = PA ; Axis = x ; Fl. accession = 10-s-86

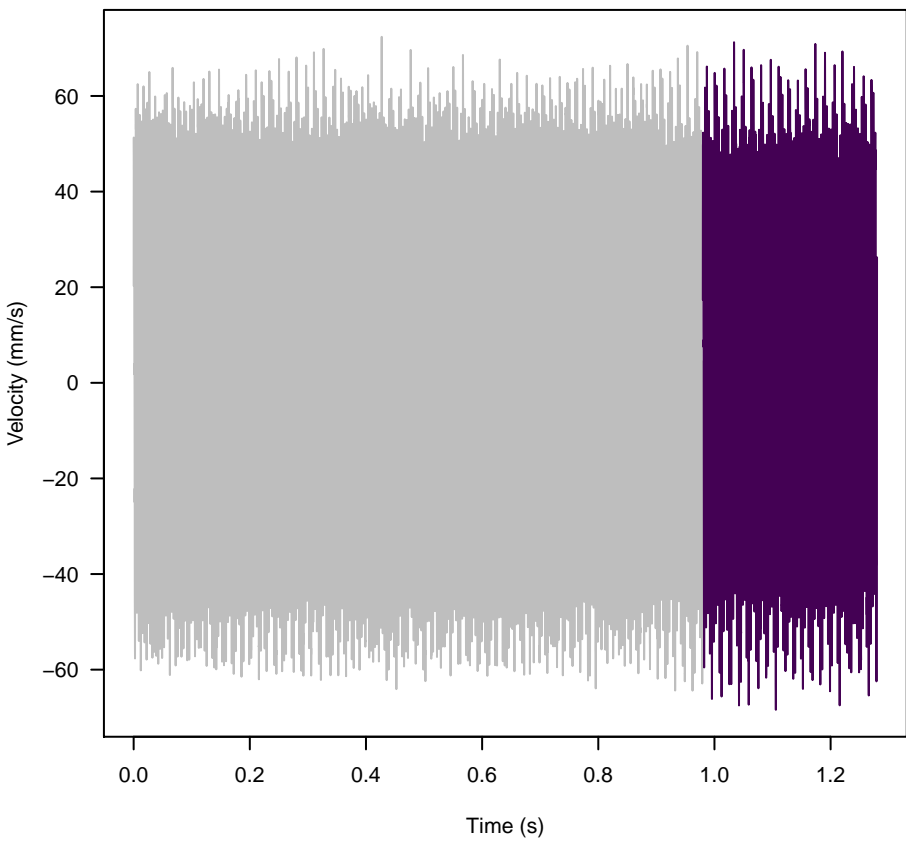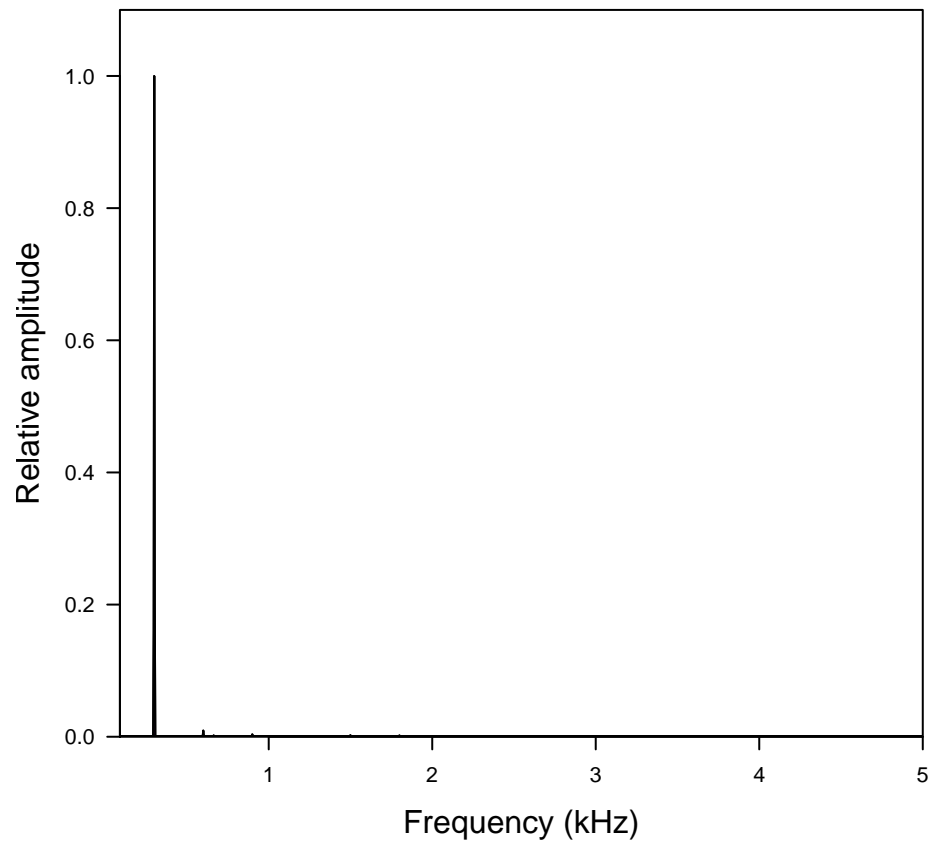

Vel. = 0.028 ; Str. = Receptacle ; Axis = x ; Fl. accession = 10-s-86

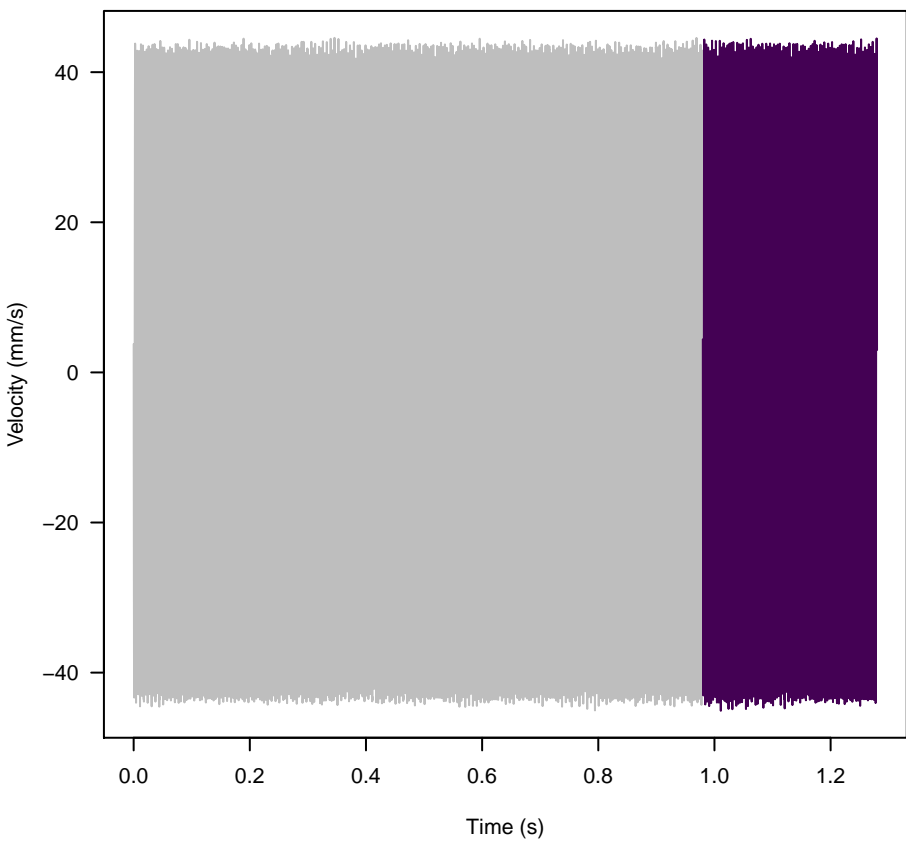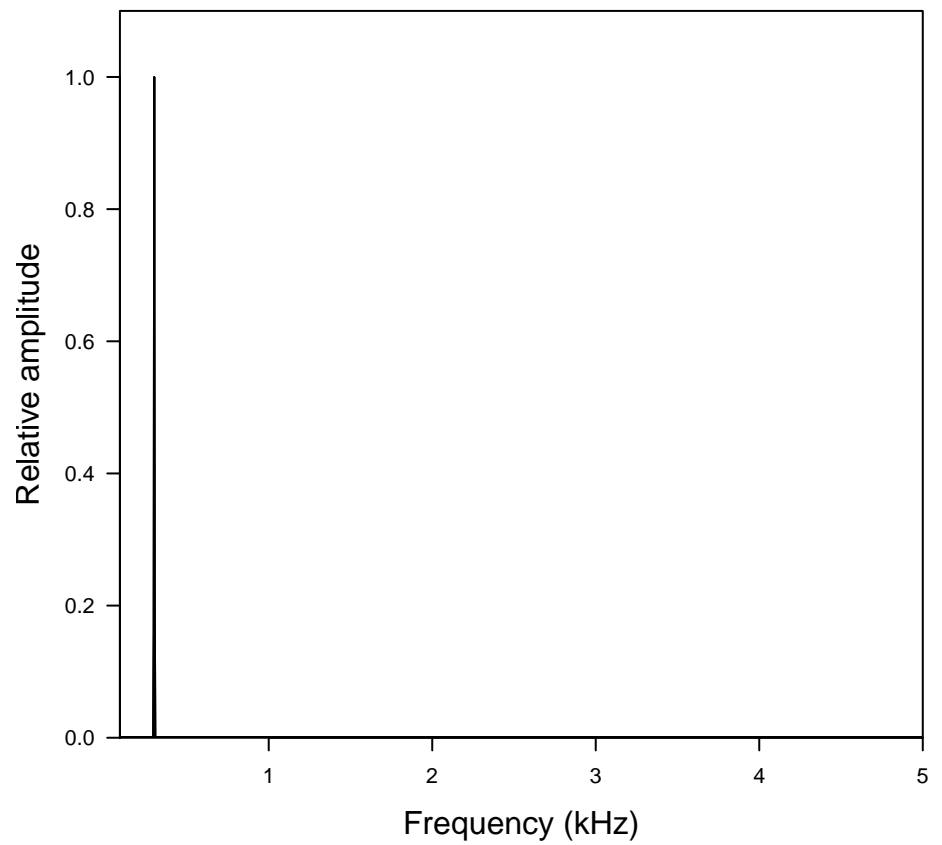

Vel. = 0.028 ; Str. = FA ; Axis = x ; Fl. accession = 10-s-86

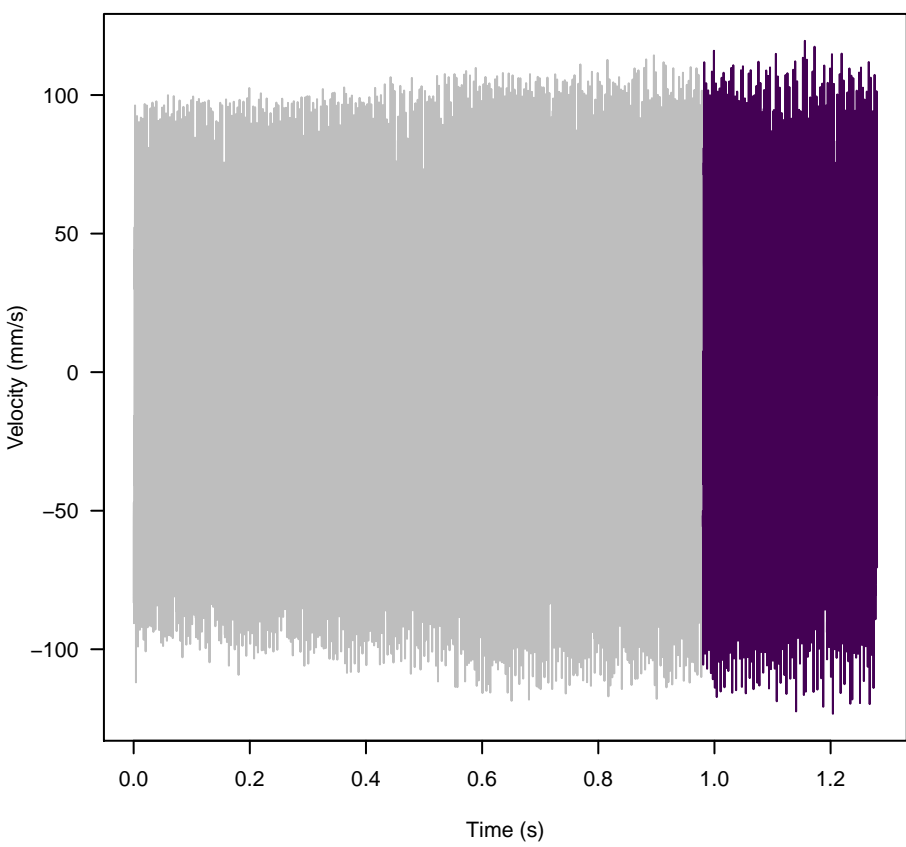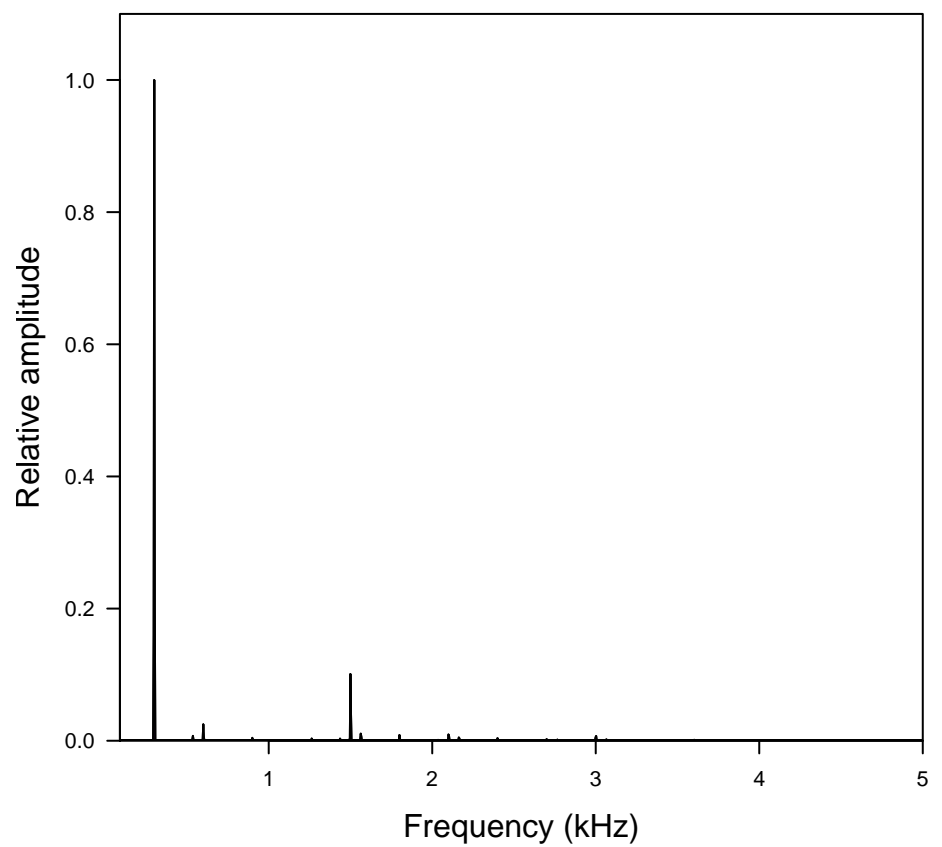

Vel. = 0.028 ; Str. = Receptacle ; Axis = x ; Fl. accession = 10-s-86

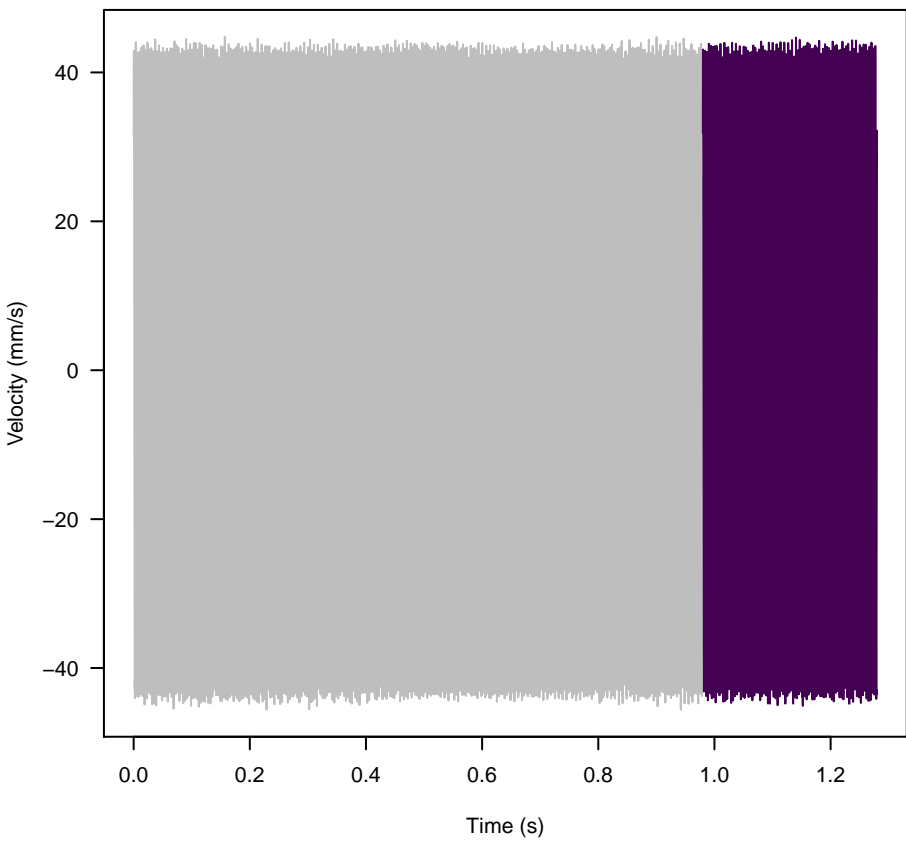

Vel. = 0.028 ; Str. = Corolla ; Axis = x ; Fl. accession = 10-s-86

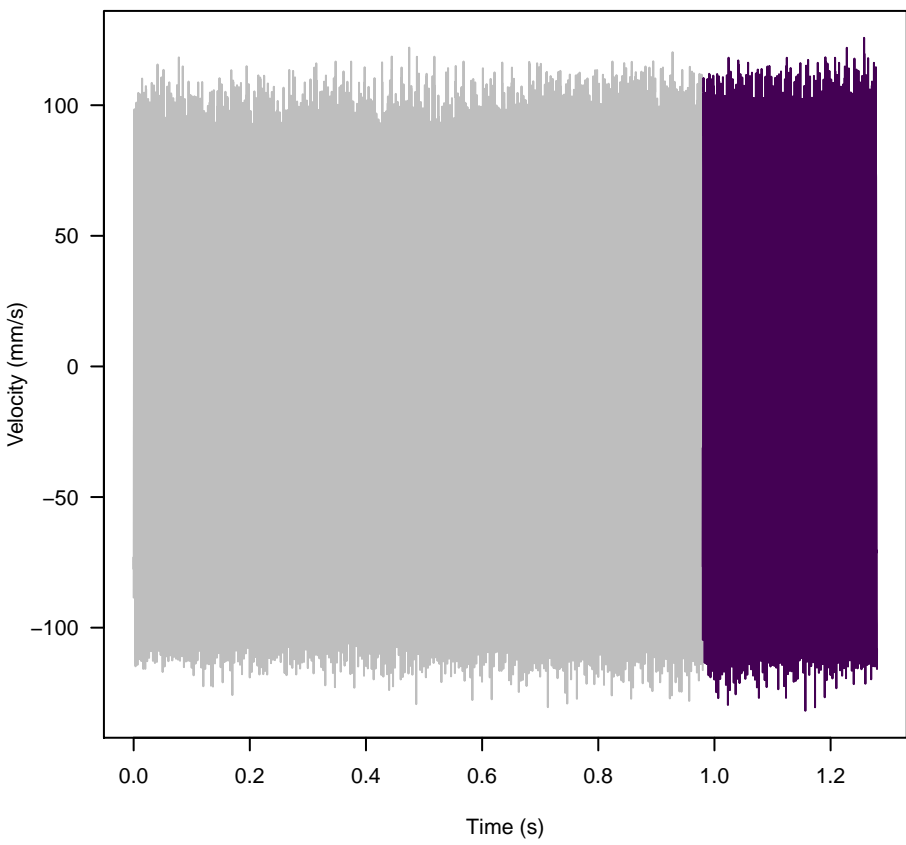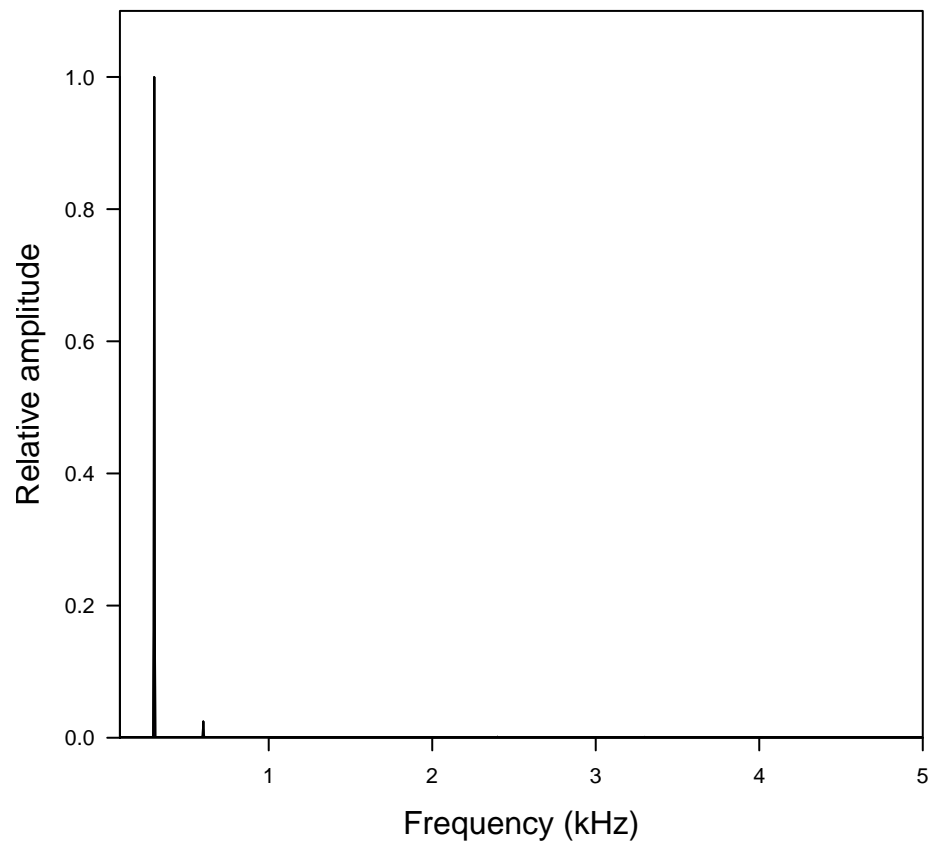

Vel. = 0.028 ; Str. = Receptacle ; Axis = x ; Fl. accession = 10-s-86

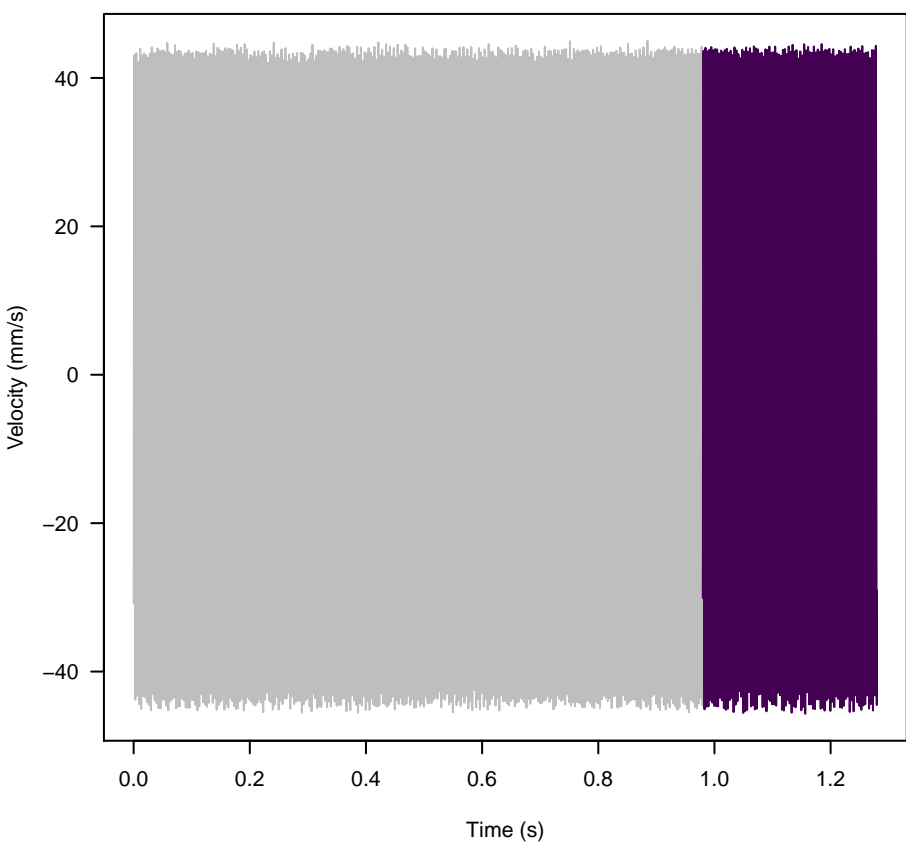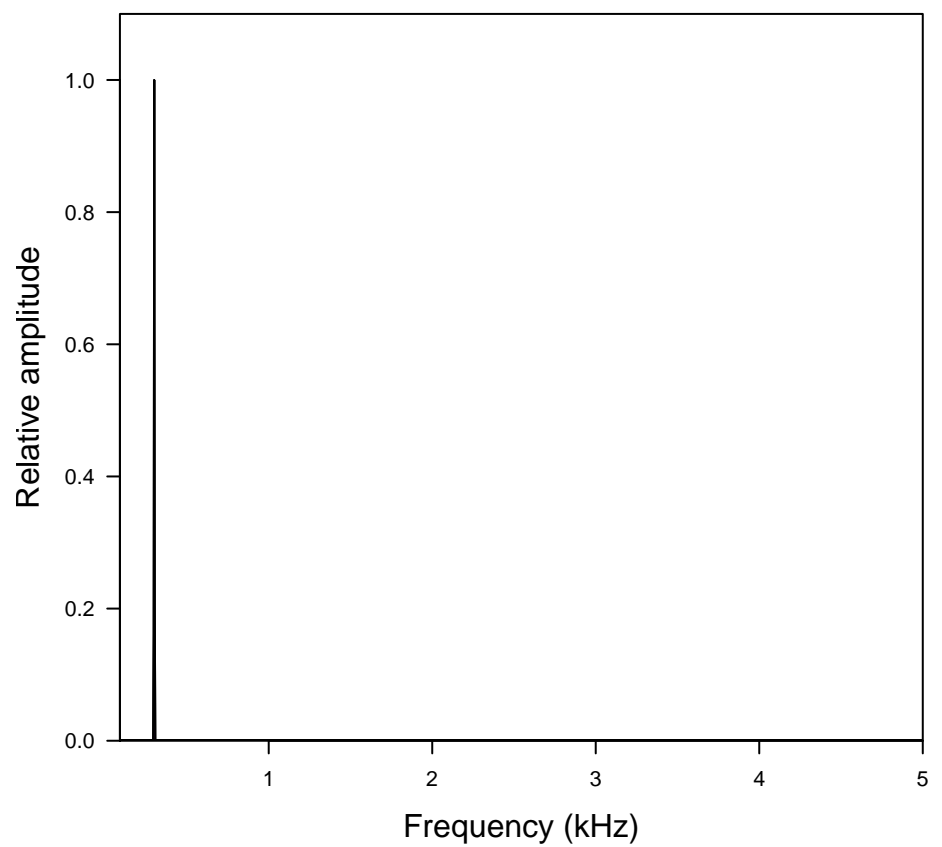

Vel. = 0.057 ; Str. = Corolla ; Axis = x ; Fl. accession = 10-s-86

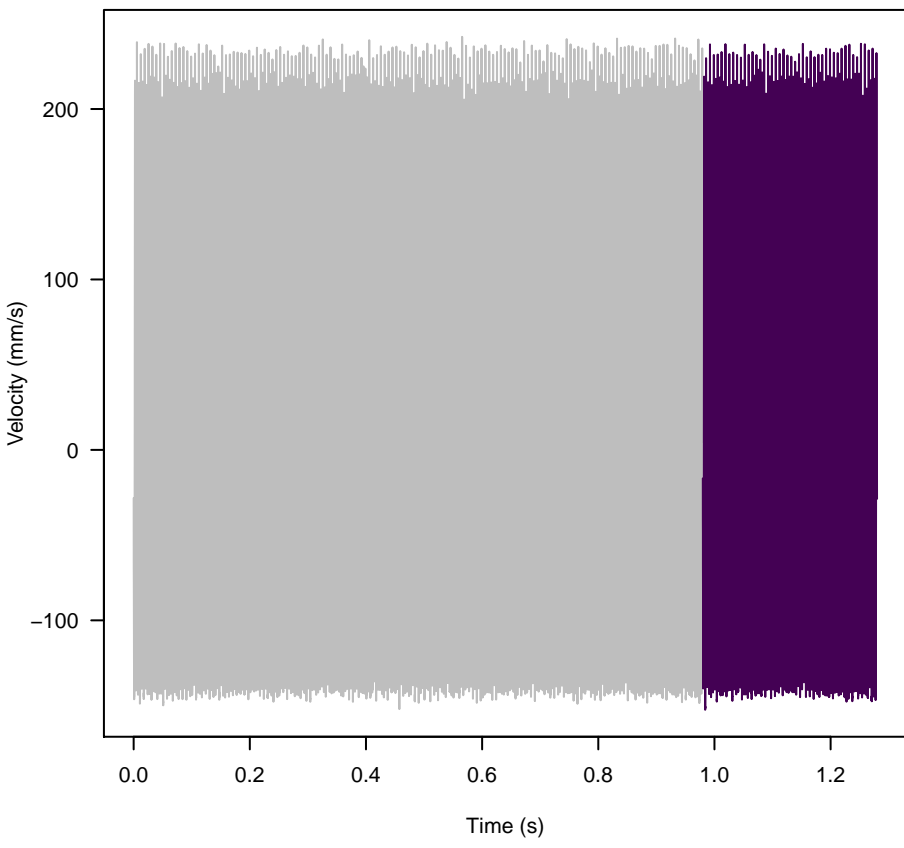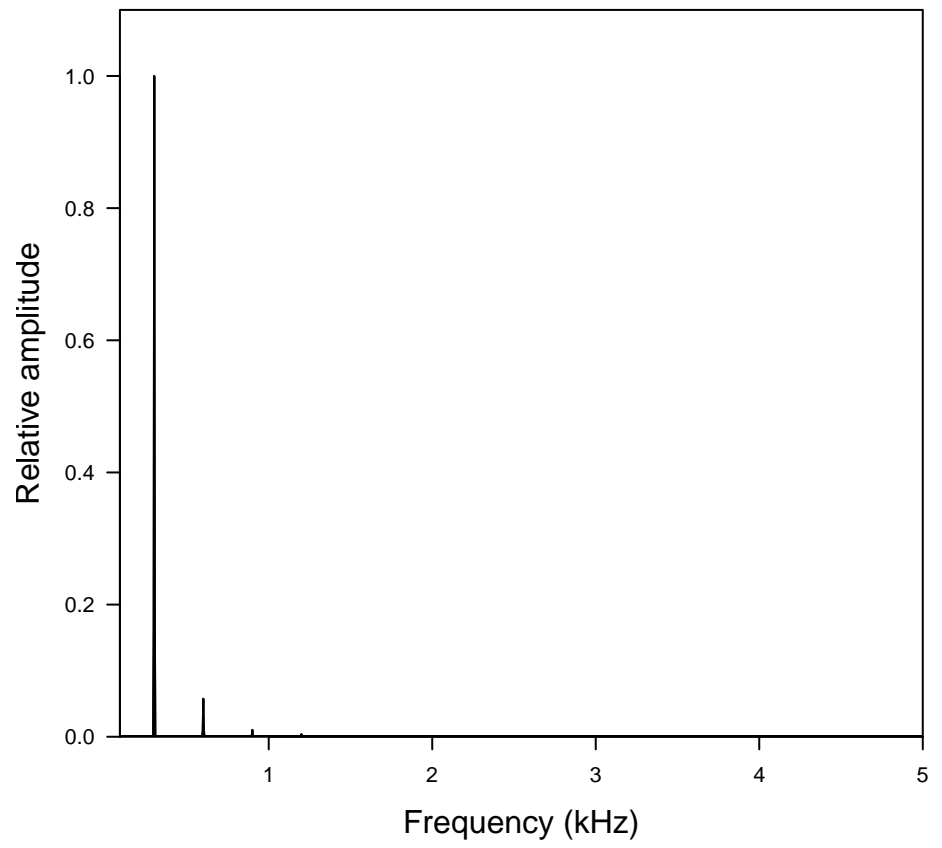

Vel. = 0.057 ; Str. = Receptacle ; Axis = x ; Fl. accession = 10-s-86

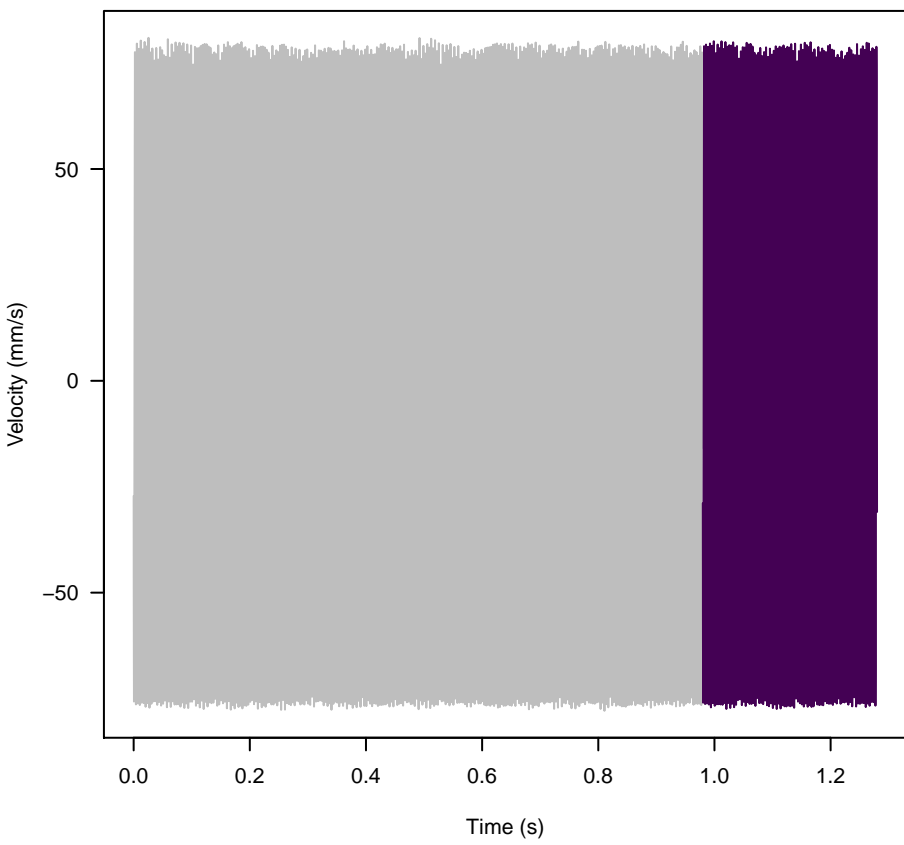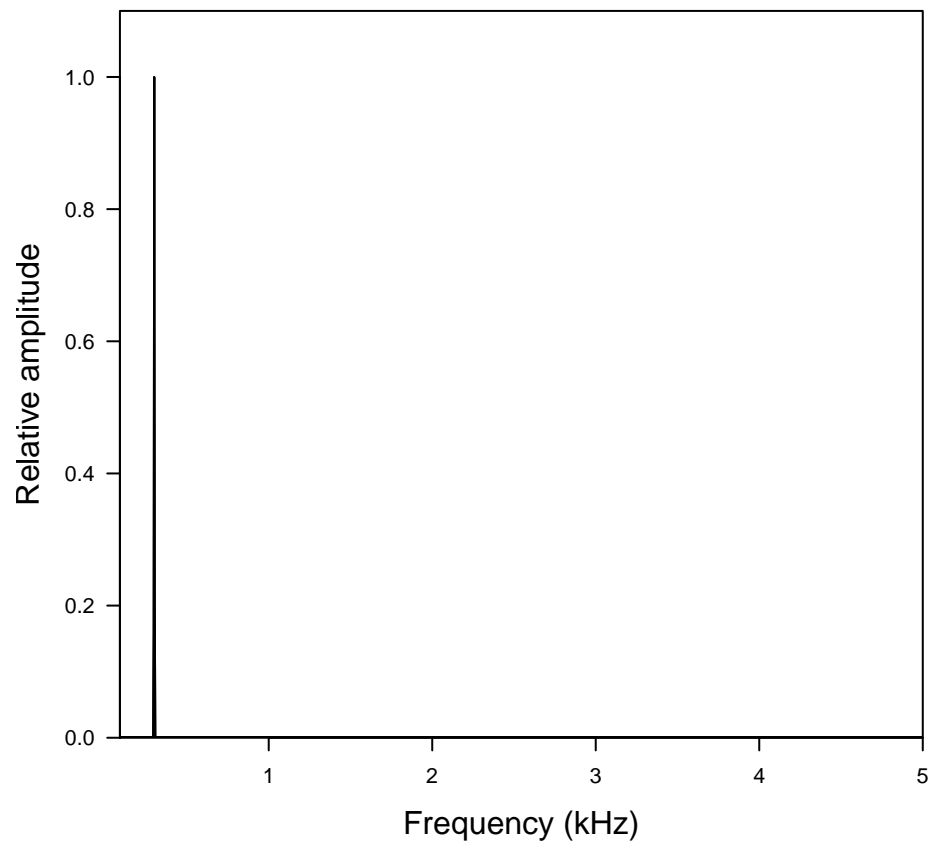

Vel. = 0.057 ; Str. = FA ; Axis = x ; Fl. accession = 10-s-86

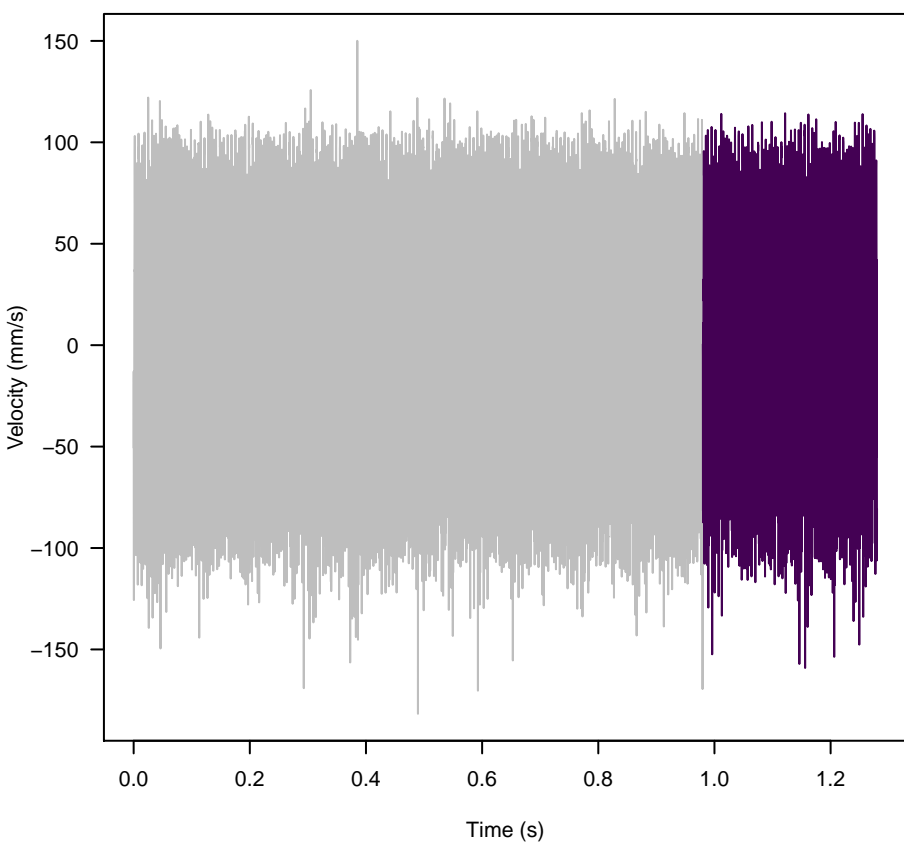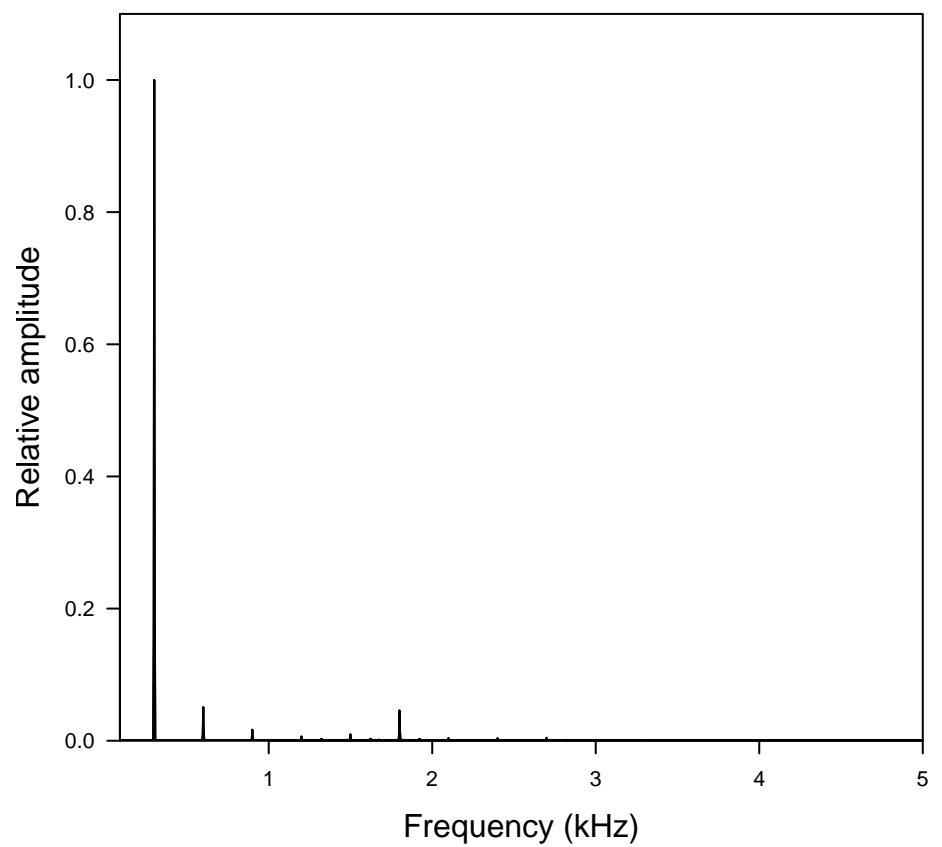

Vel. = 0.057 ; Str. = Receptacle ; Axis = x ; Fl. accession = 10-s-86

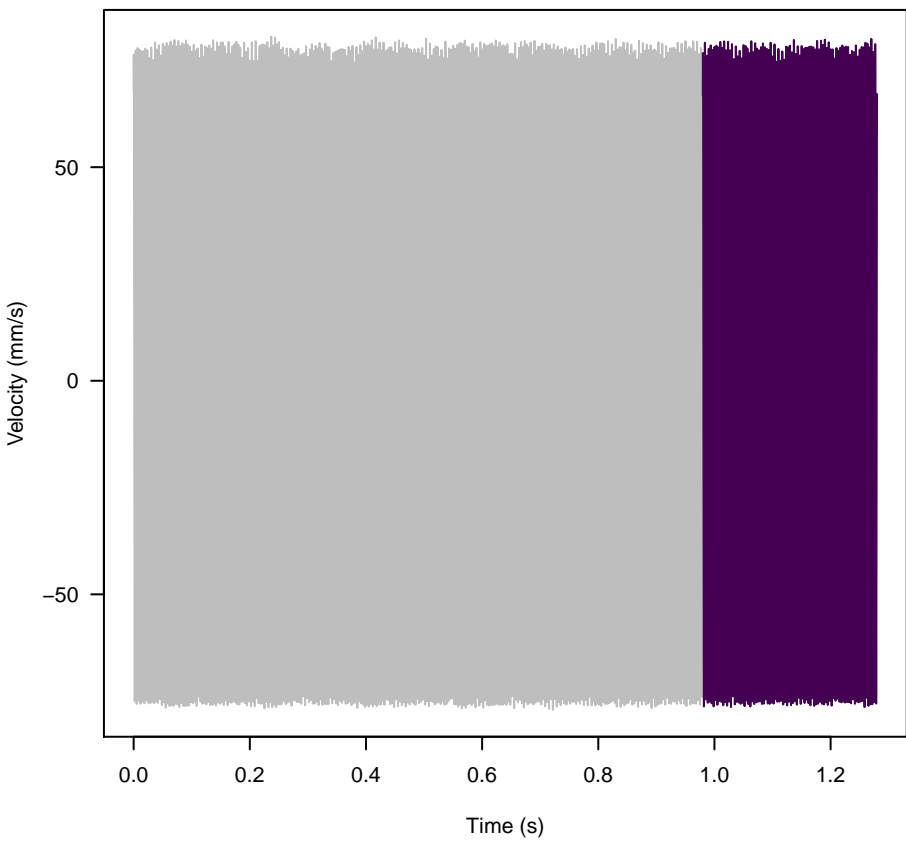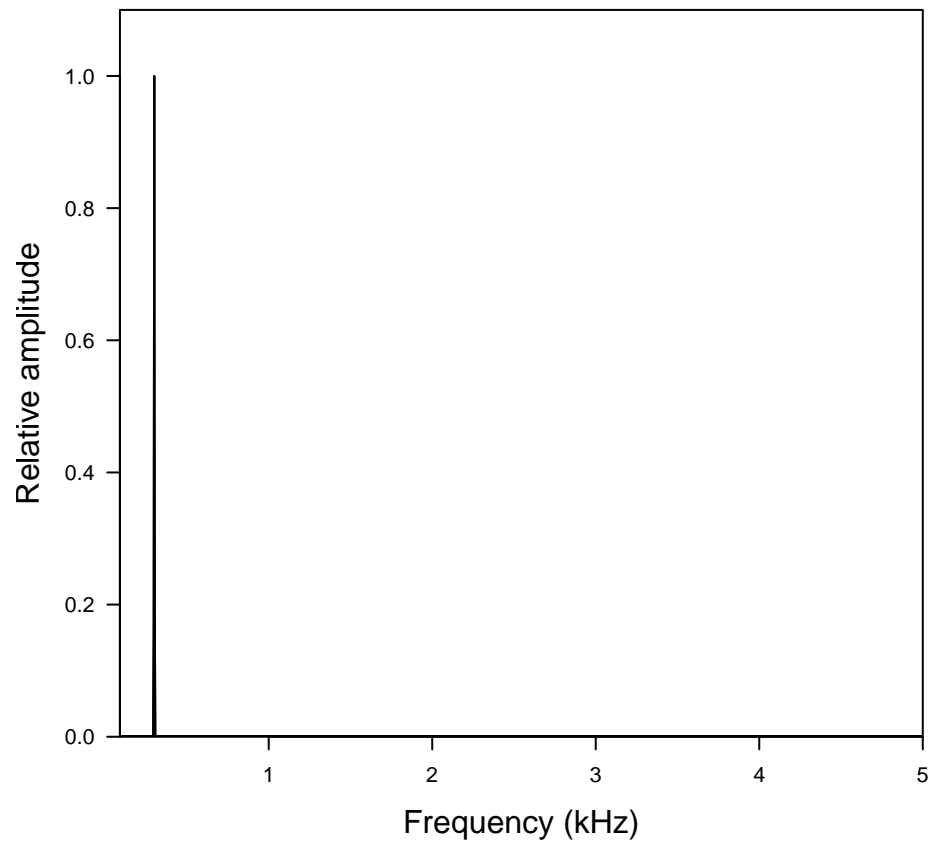

Vel. = 0.057 ; Str. = PA ; Axis = x ; Fl. accession = 10-s-86

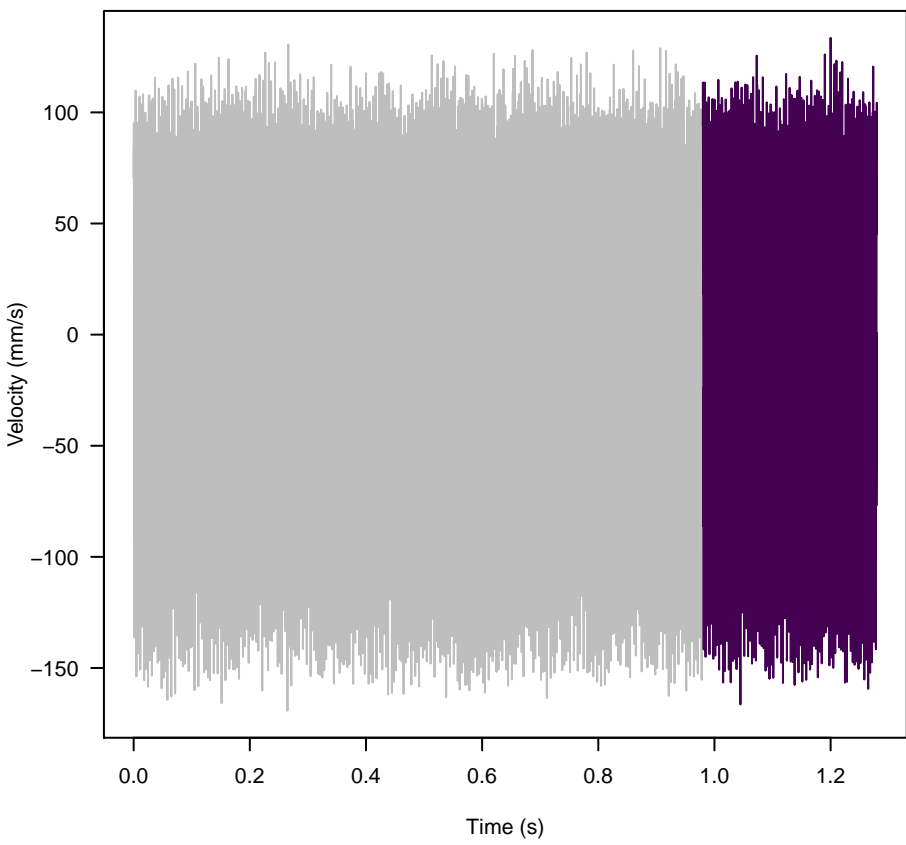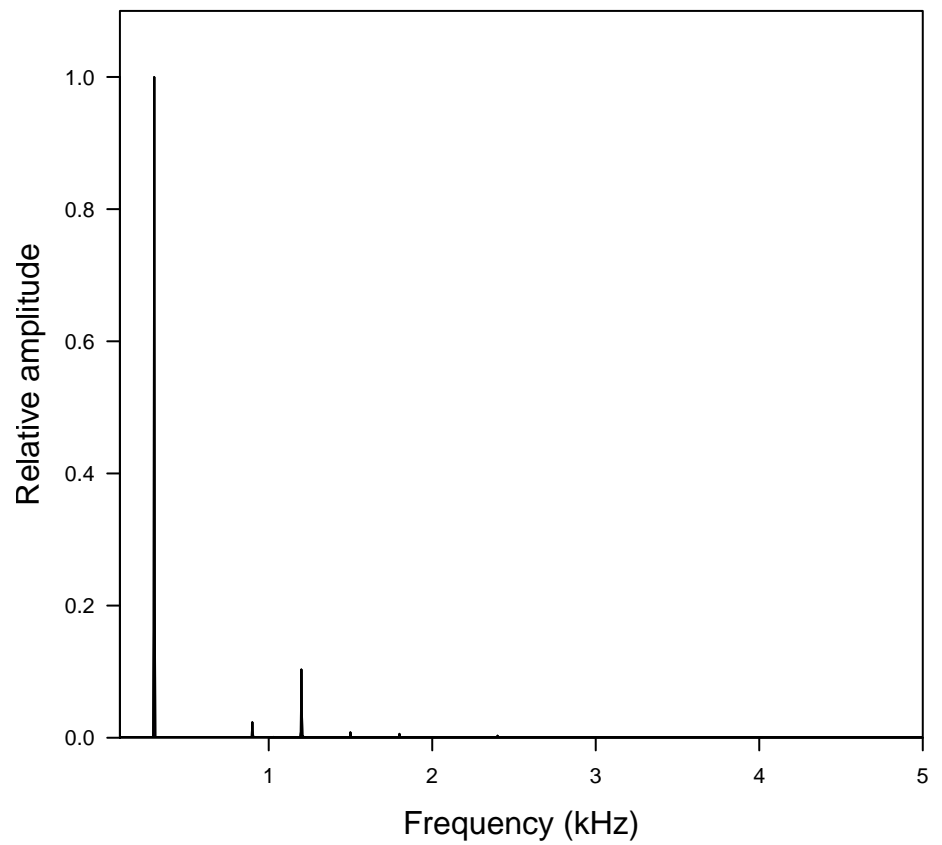

Vel. = 0.057 ; Str. = Receptacle ; Axis = x ; Fl. accession = 10-s-86

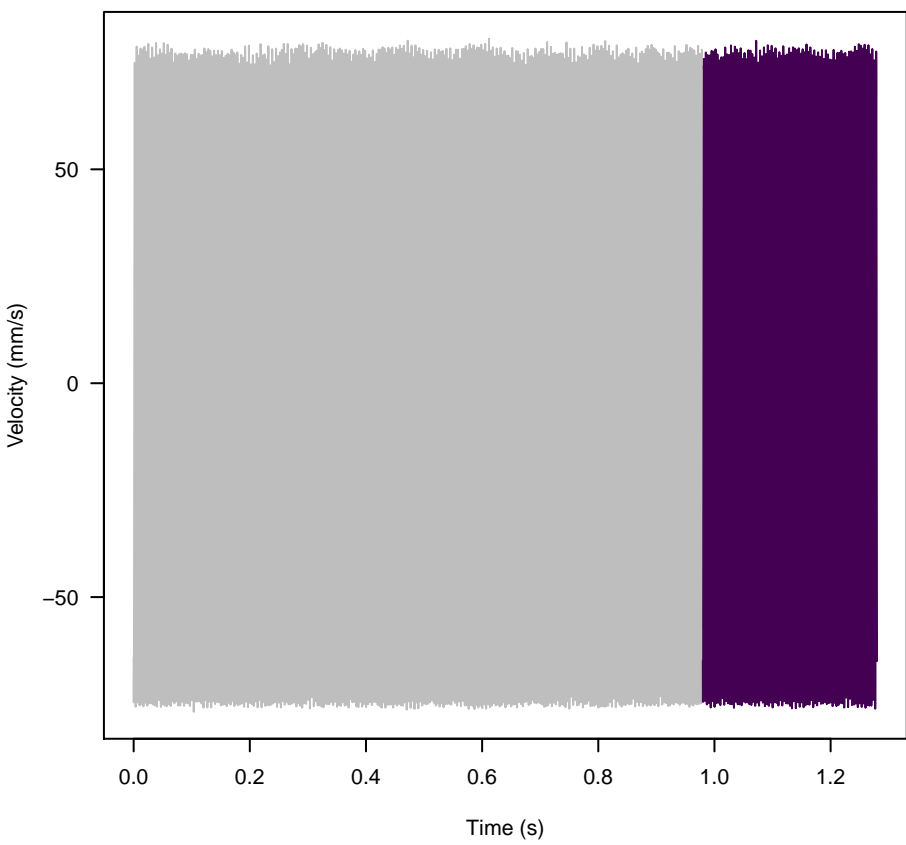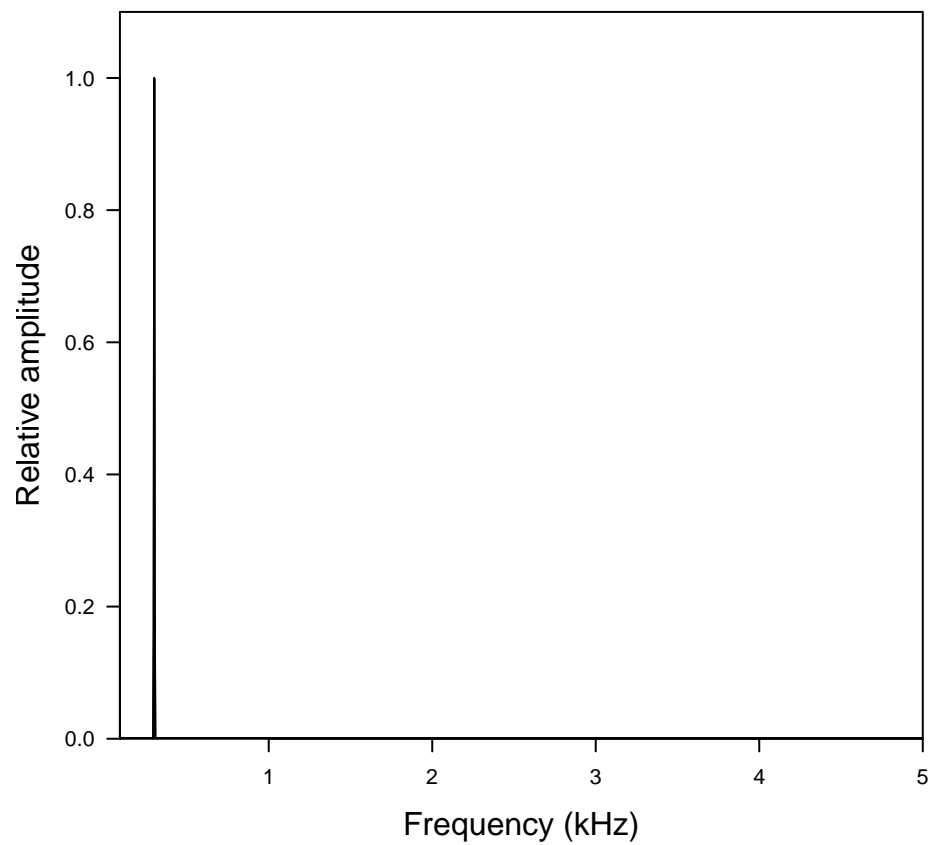

Vel. = 0.014 ; Str. = Corolla ; Axis = x ; Fl. accession = 10-s-77-19

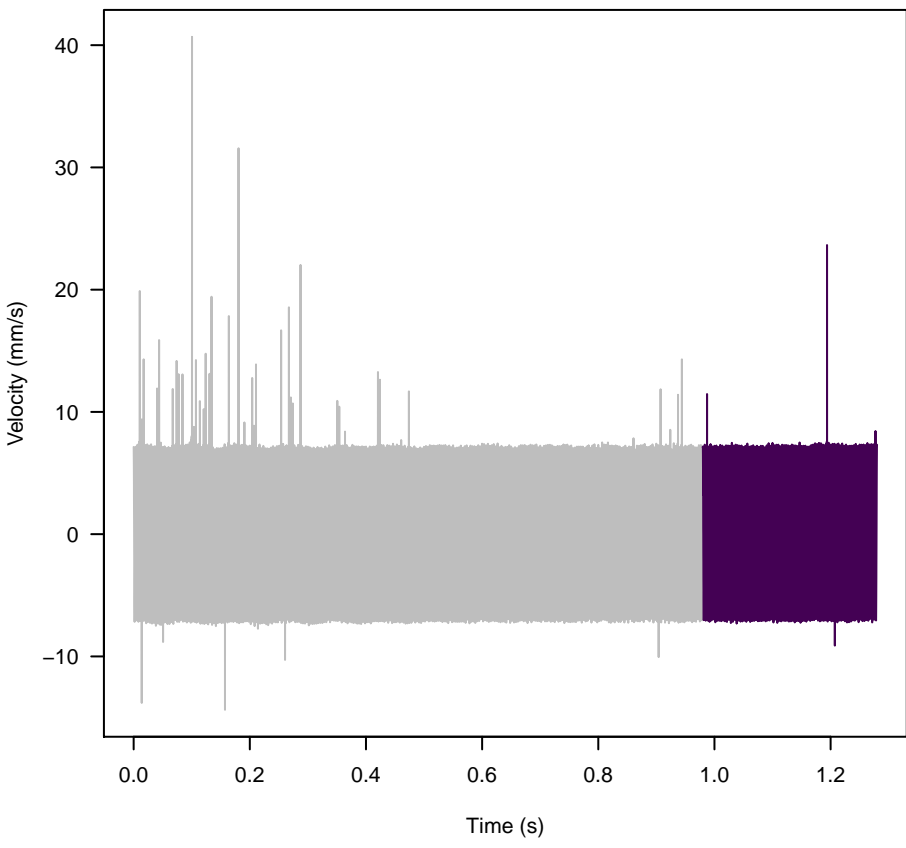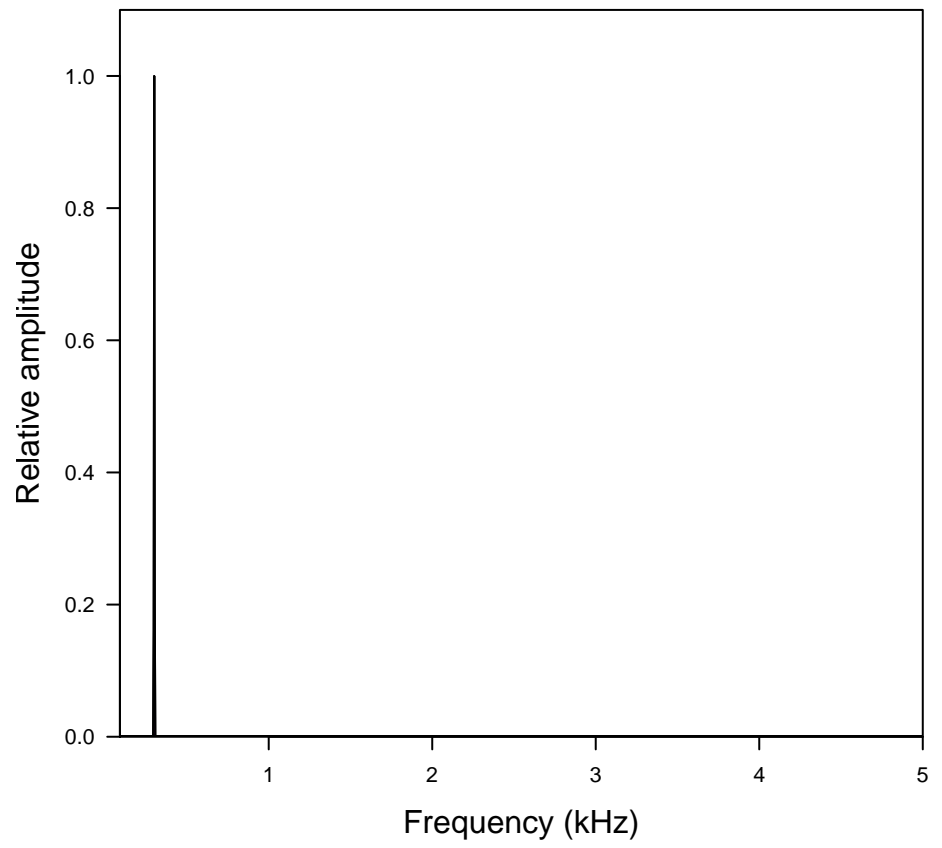

Vel. = 0.014 ; Str. = Receptacle ; Axis = x ; Fl. accession = 10-s-77-19

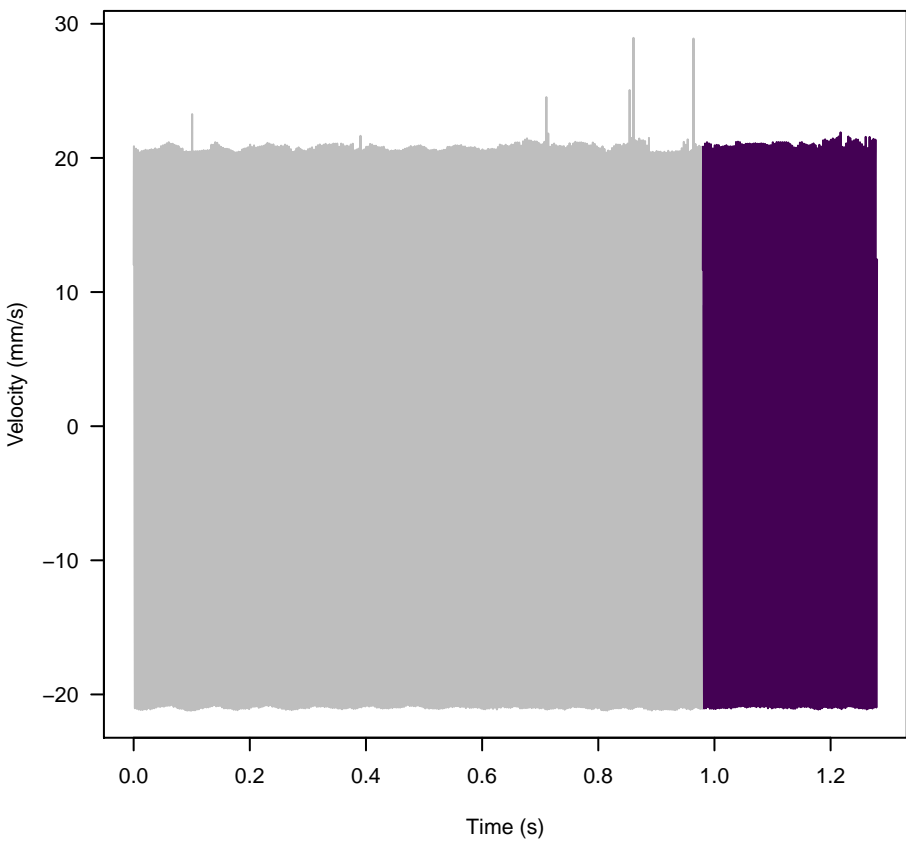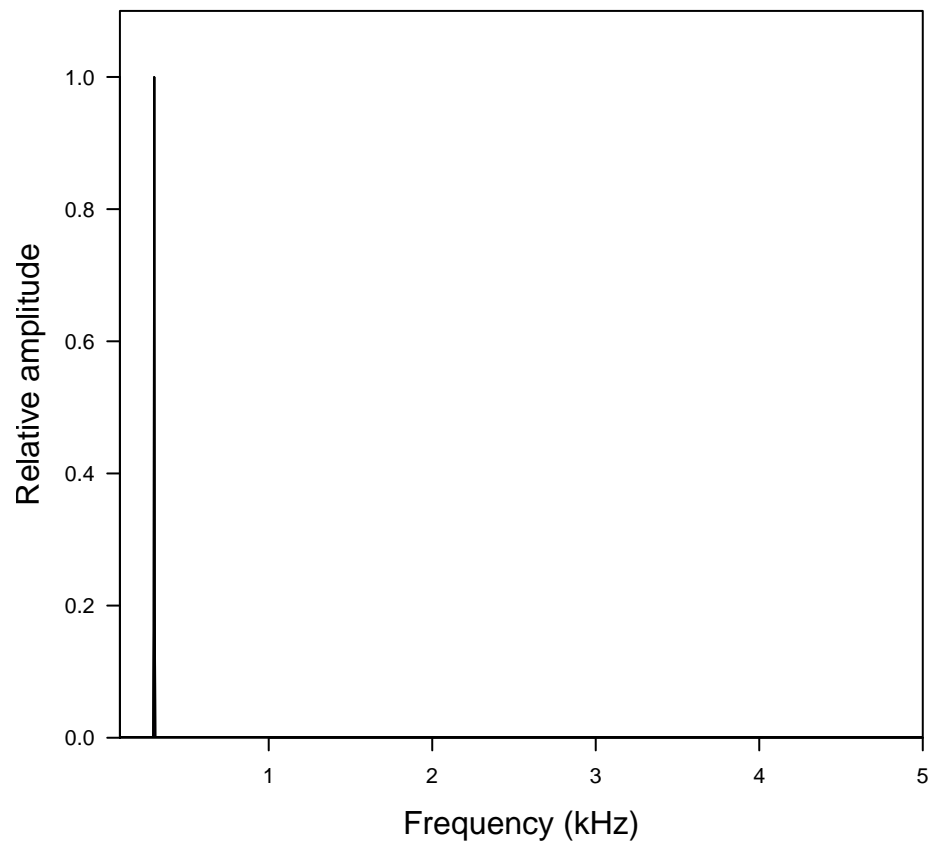

Vel. = 0.014 ; Str. = FA ; Axis = x ; Fl. accession = 10-s-77-19

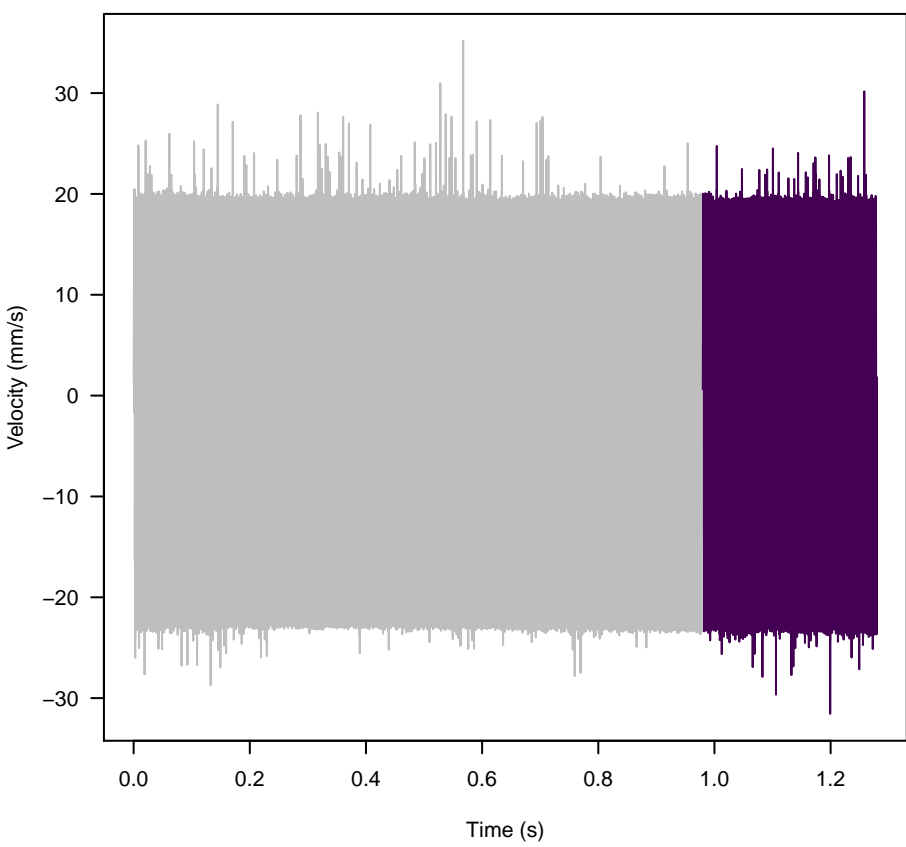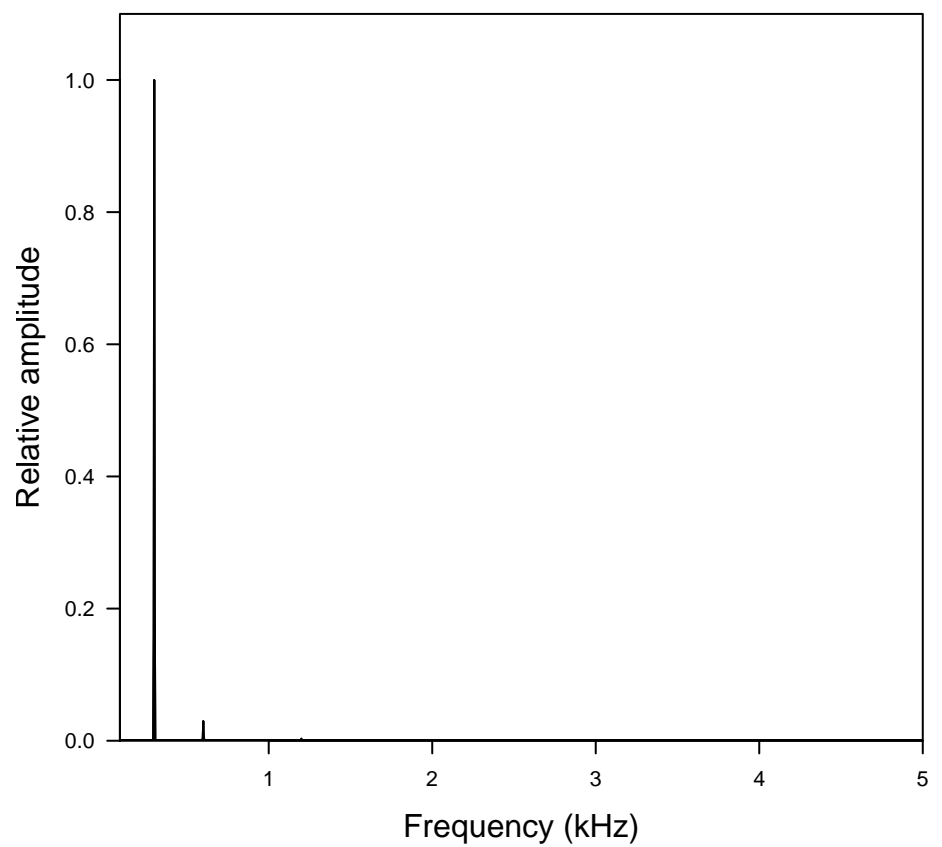

Vel. = 0.014 ; Str. = Receptacle ; Axis = x ; Fl. accession = 10-s-77-19

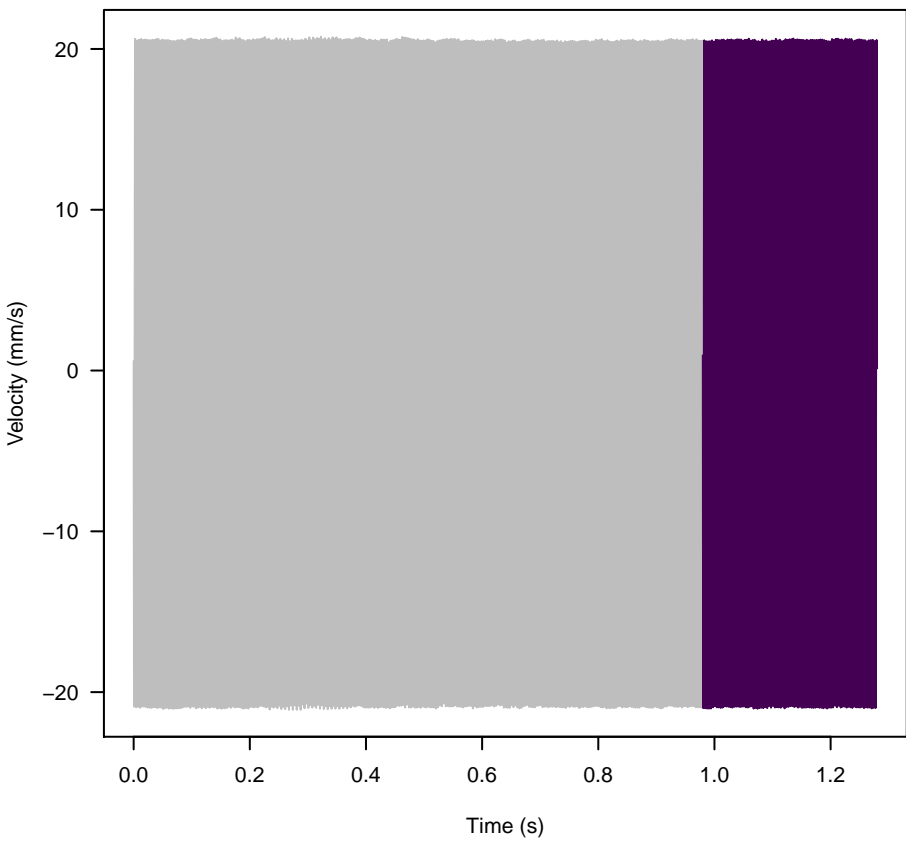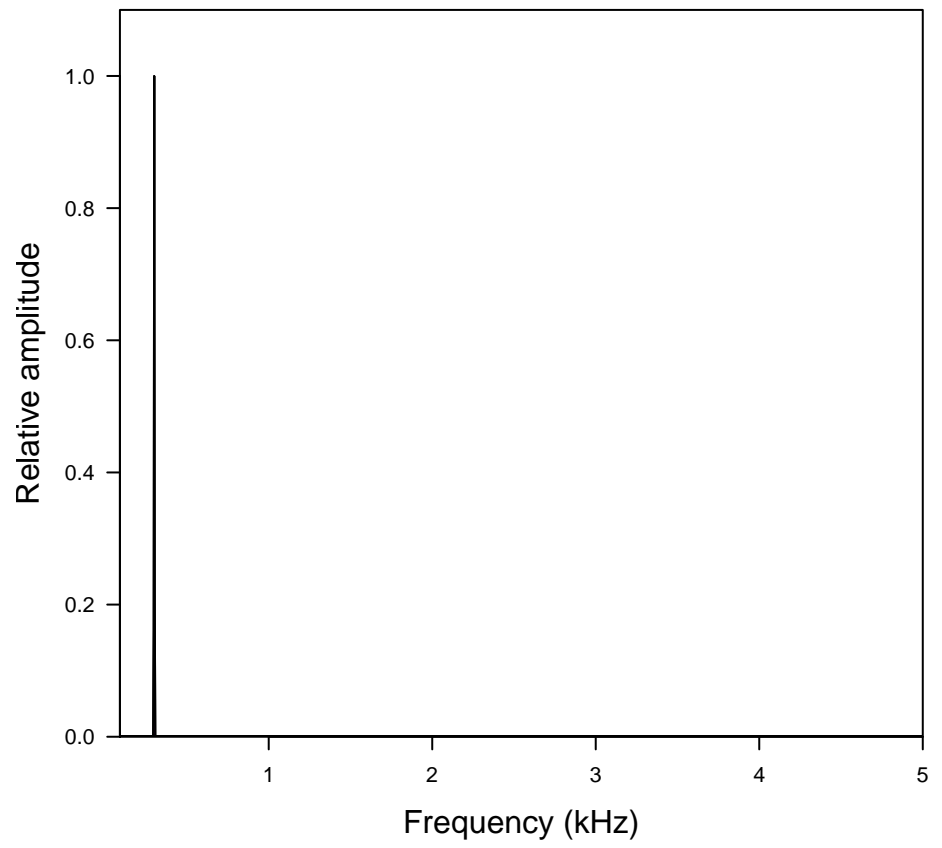

Vel. = 0.014 ; Str. = PA ; Axis = x ; Fl. accession = 10-s-77-19

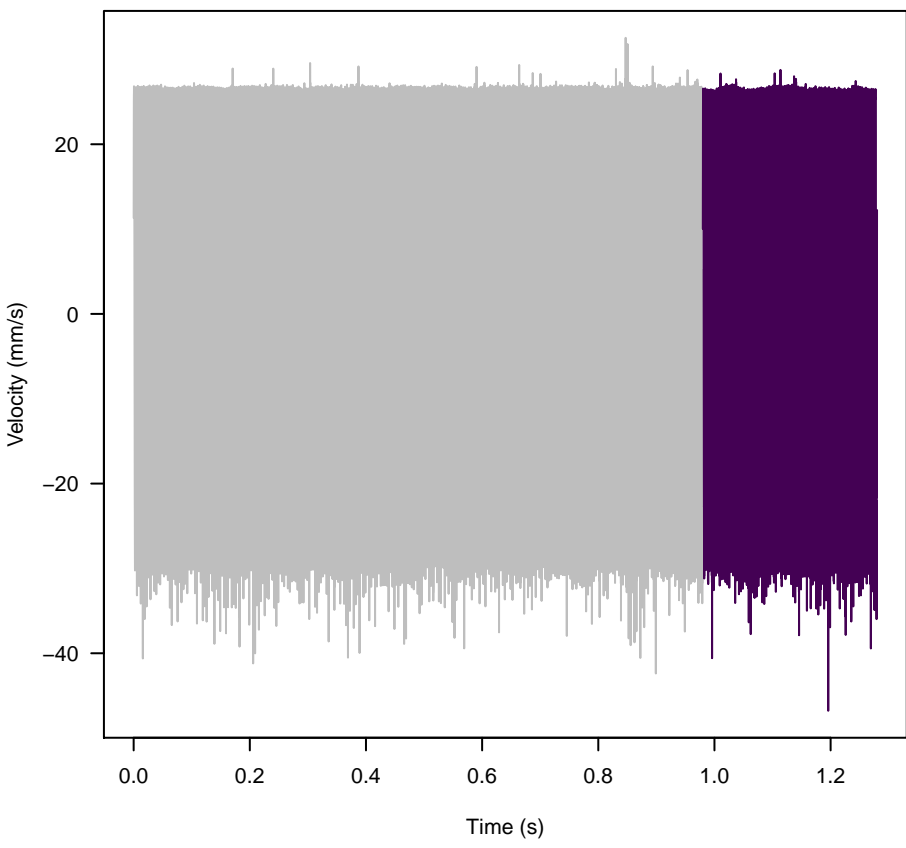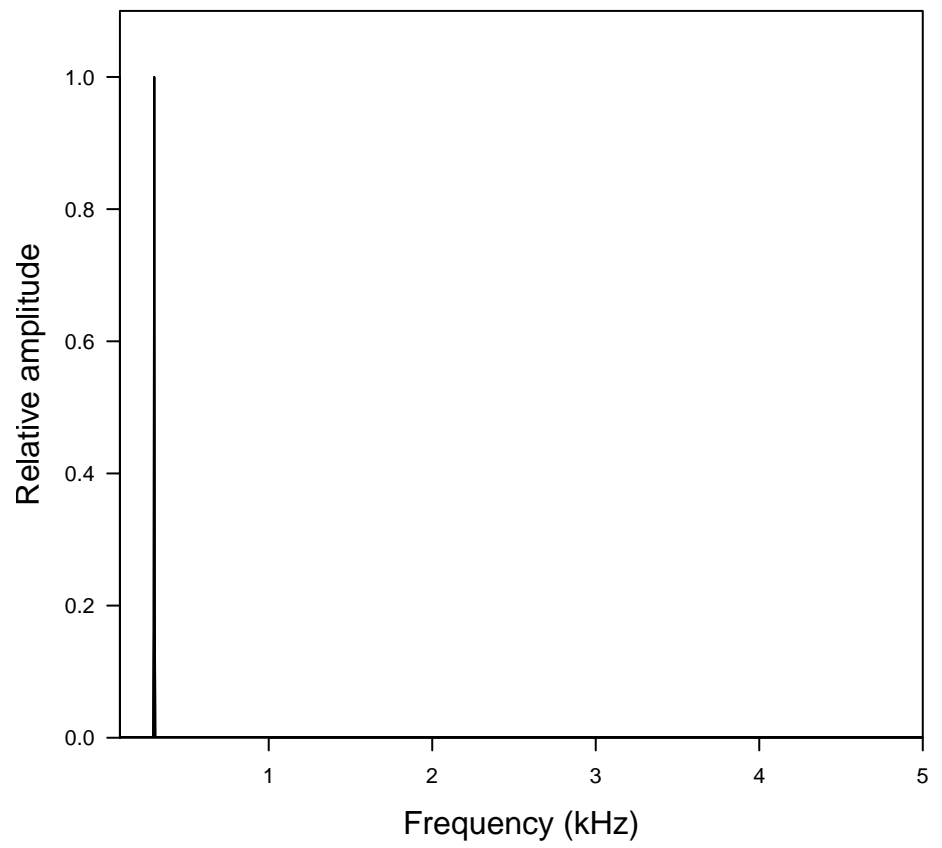

Vel. = 0.014 ; Str. = Receptacle ; Axis = x ; Fl. accession = 10-s-77-19

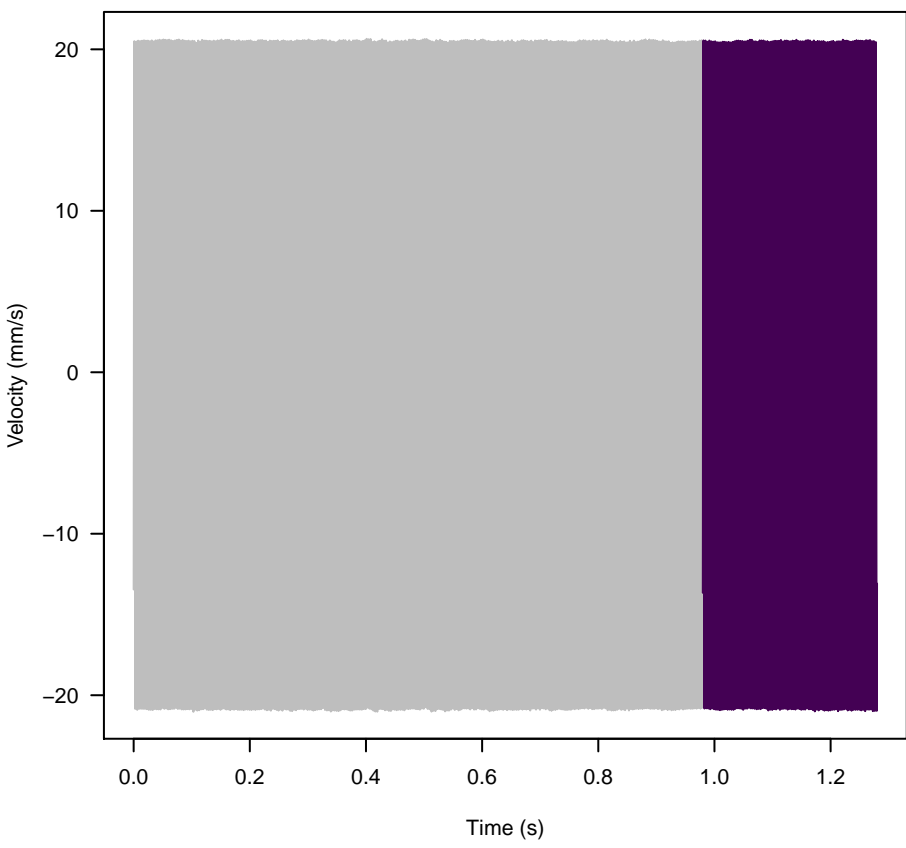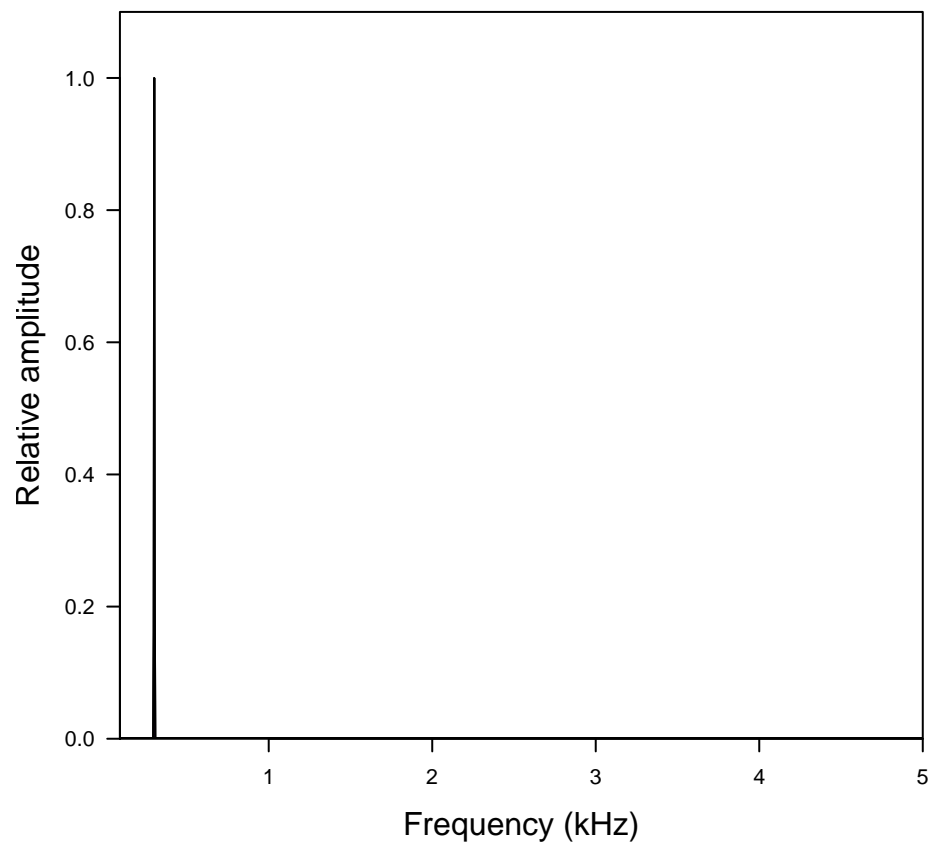

Vel. = 0.028 ; Str. = PA ; Axis = x ; Fl. accession = 10-s-77-19

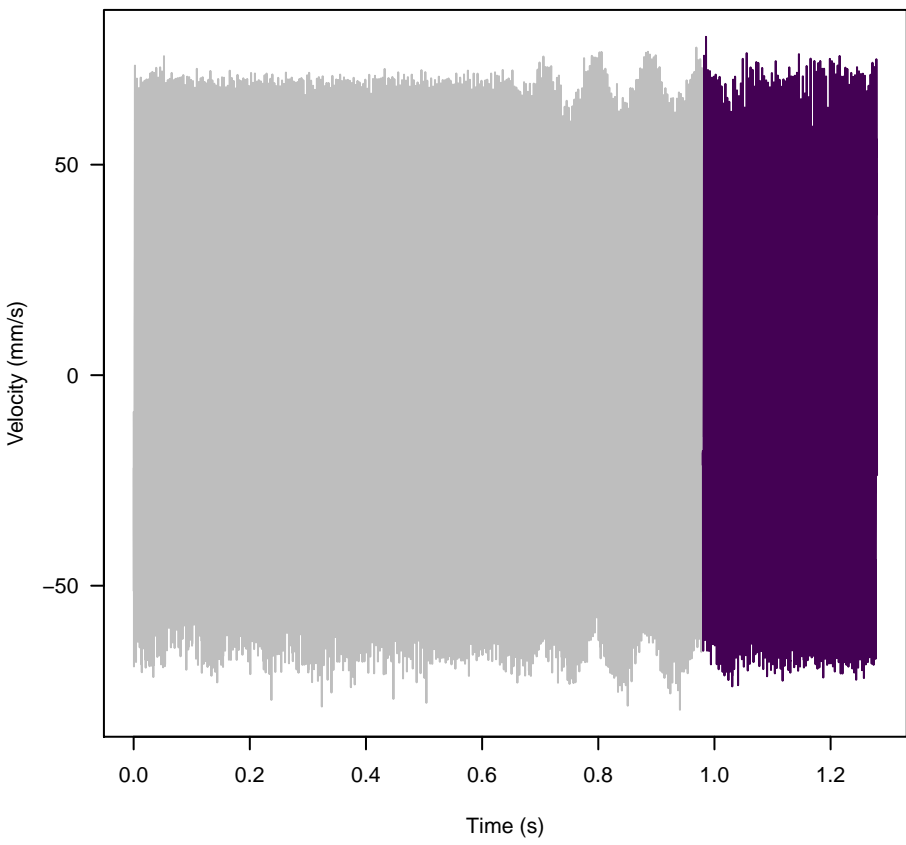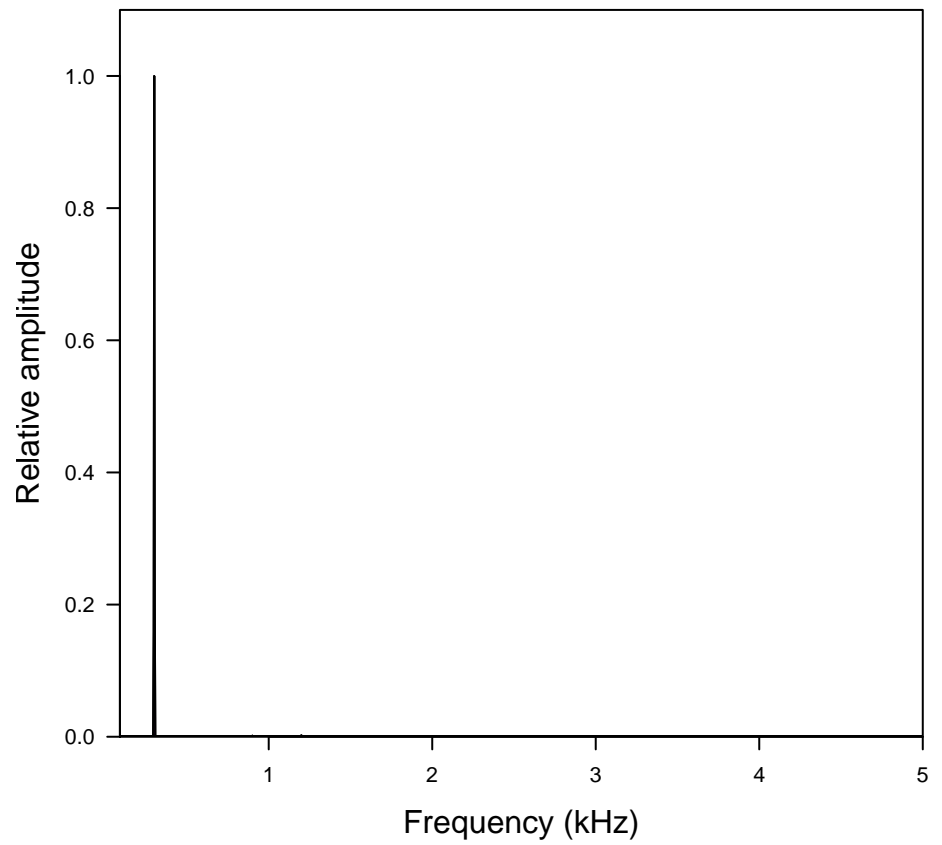

Vel. = 0.028 ; Str. = Receptacle ; Axis = x ; Fl. accession = 10-s-77-19

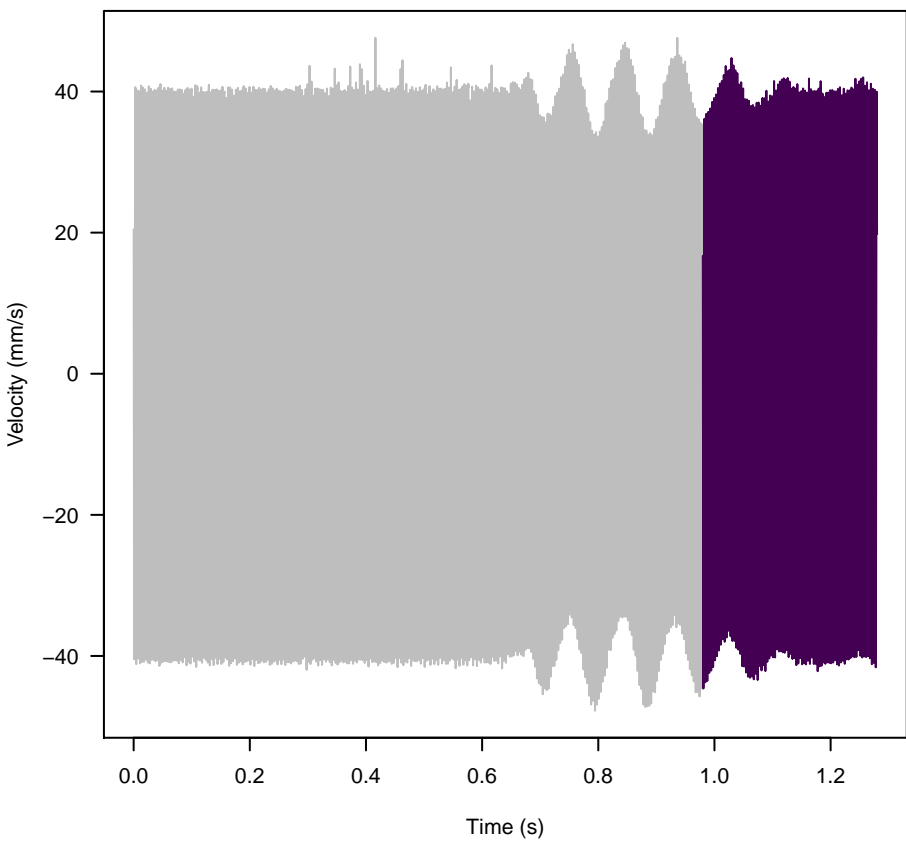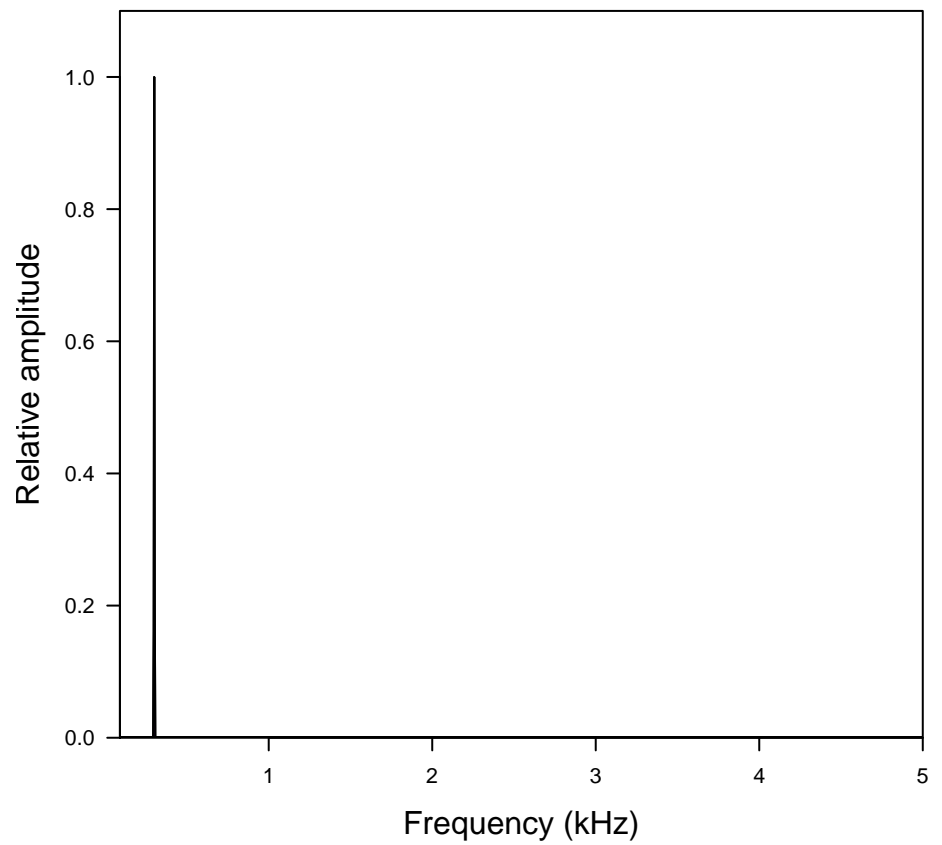

Vel. = 0.028 ; Str. = FA ; Axis = x ; Fl. accession = 10-s-77-19

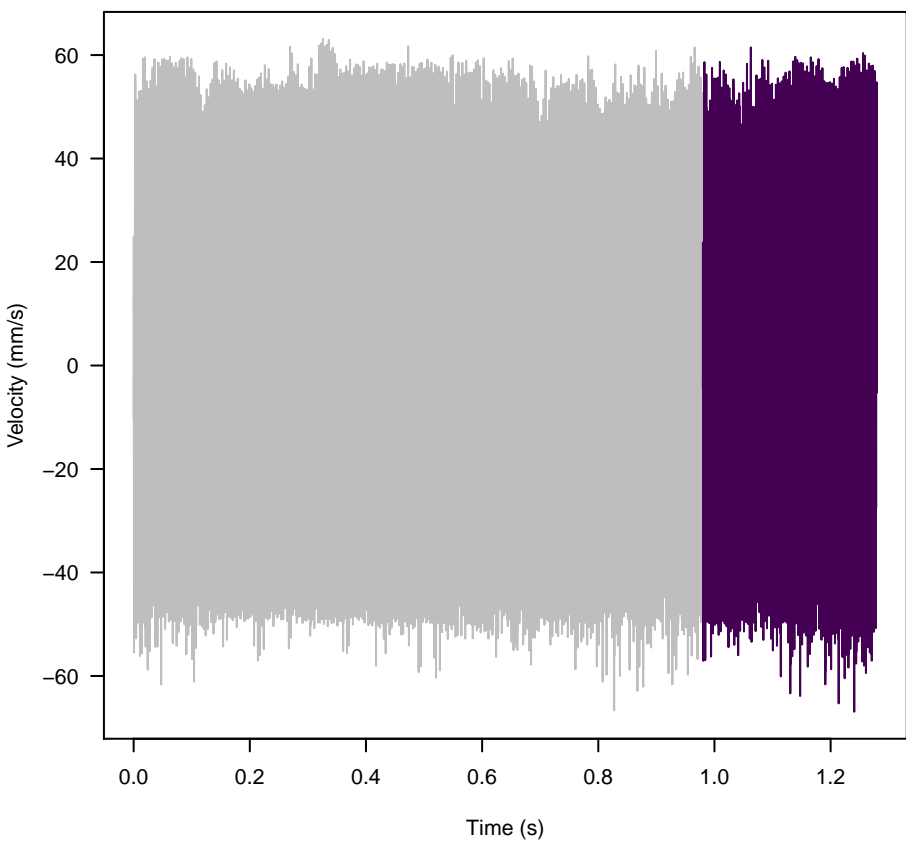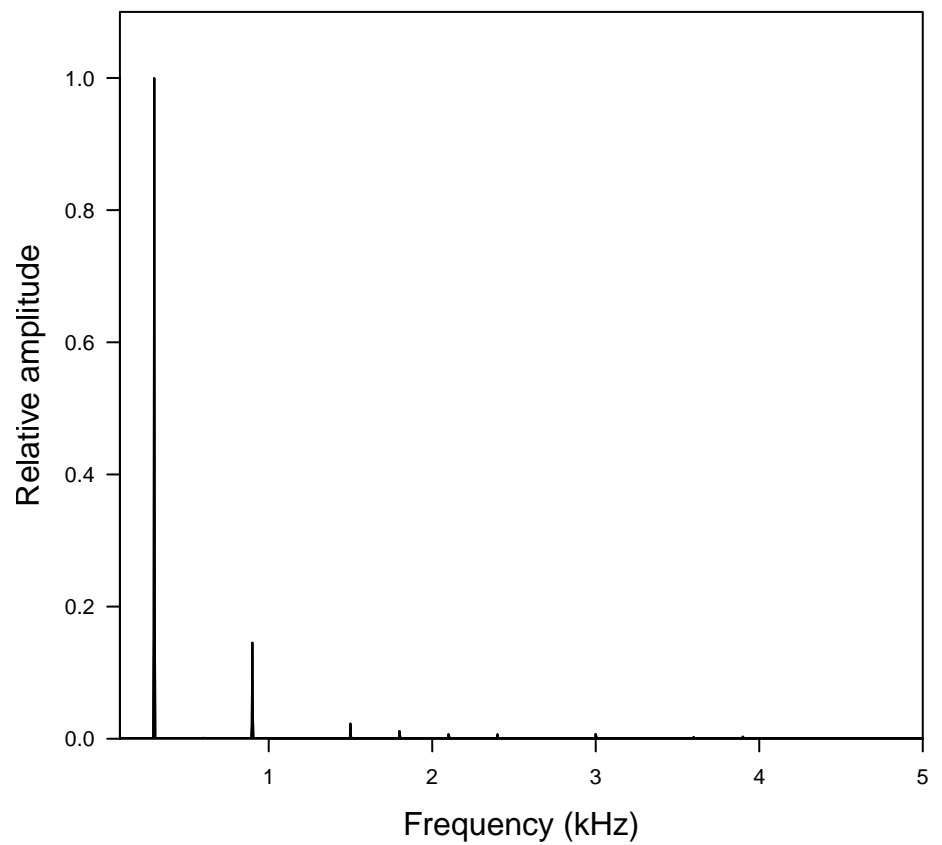

Vel. = 0.028 ; Str. = Receptacle ; Axis = x ; Fl. accession = 10-s-77-19

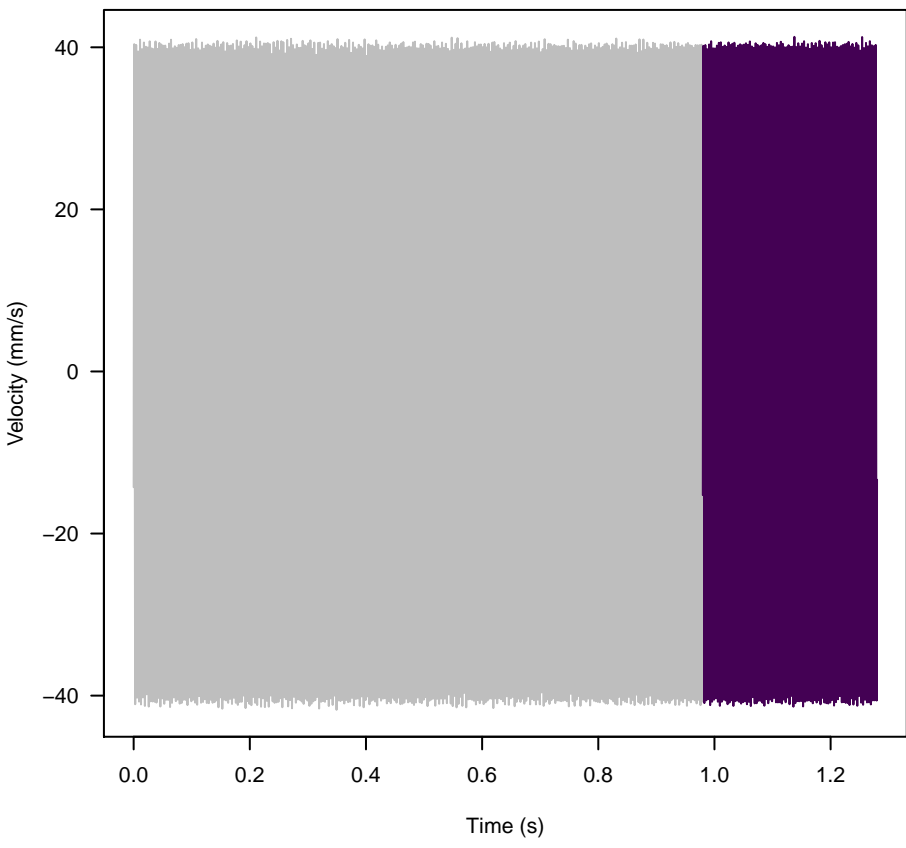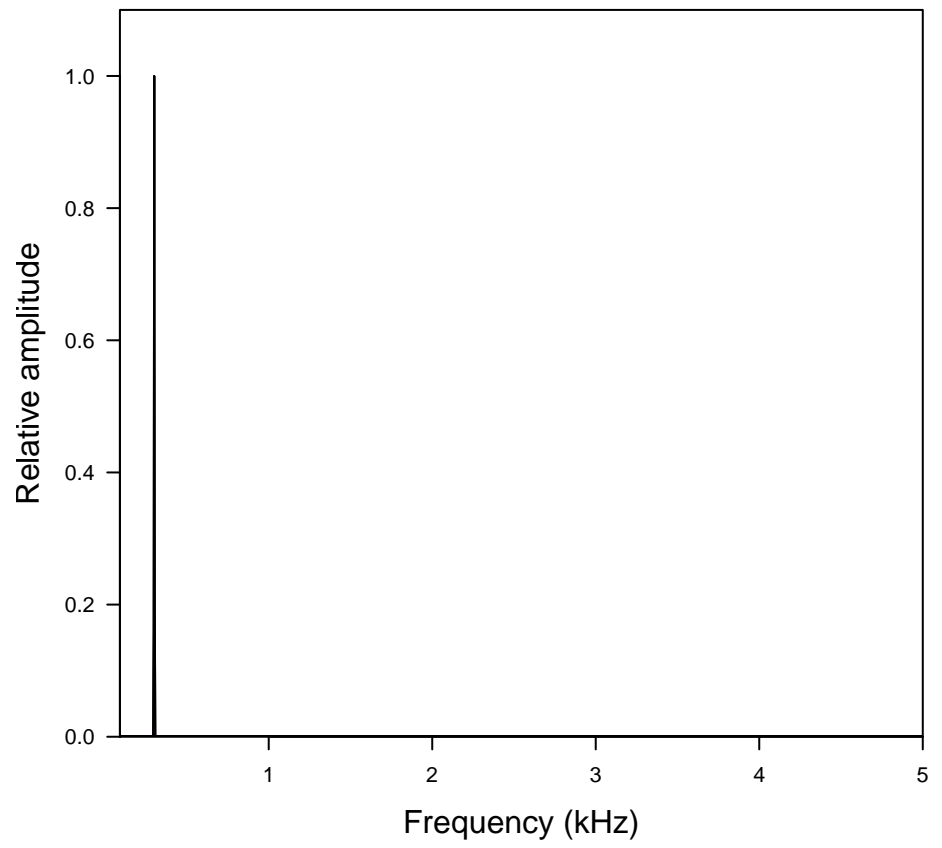

Vel. = 0.028 ; Str. = Corolla ; Axis = x ; Fl. accession = 10-s-77-19

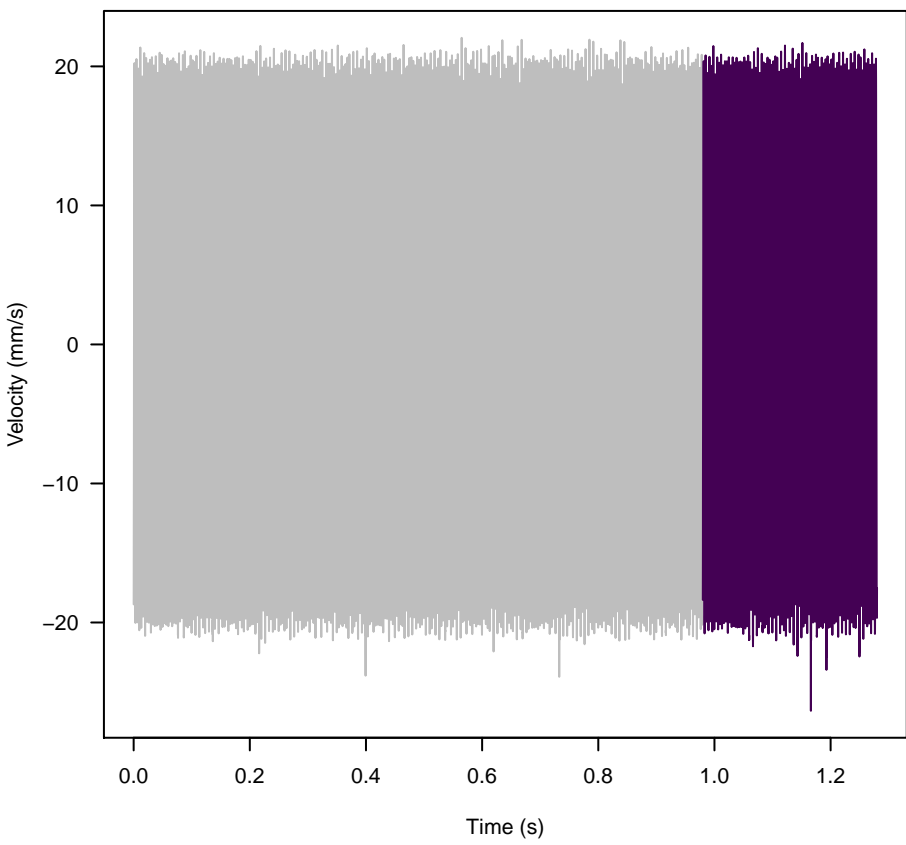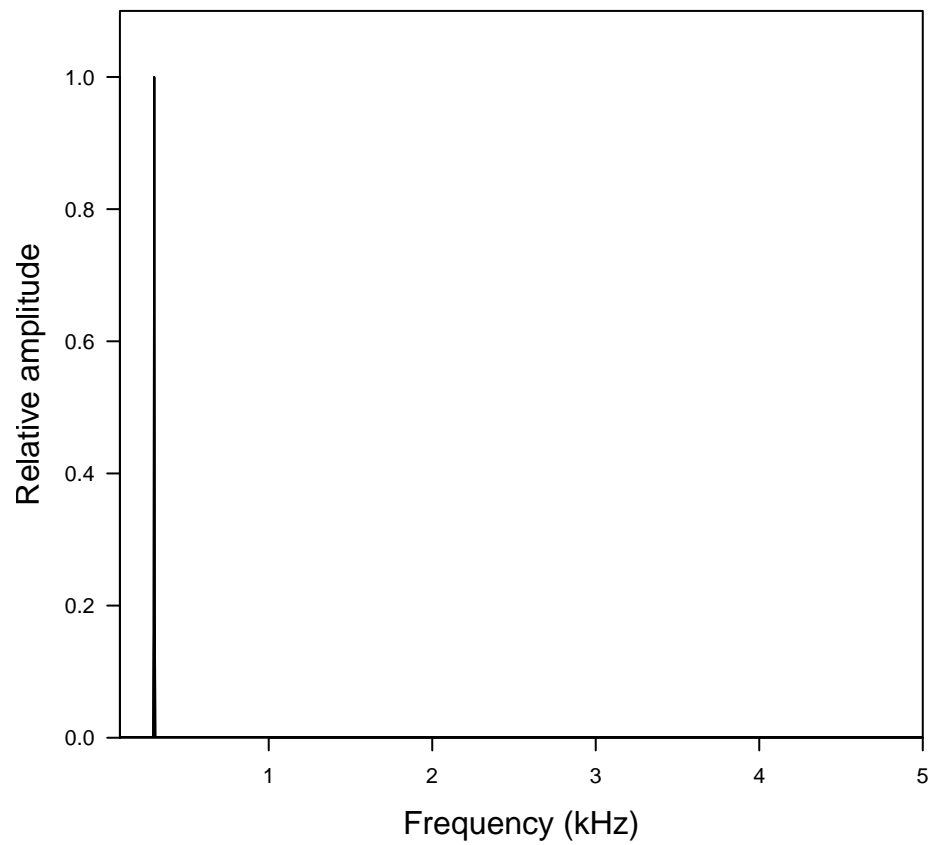

Vel. = 0.028 ; Str. = Receptacle ; Axis = x ; Fl. accession = 10-s-77-19

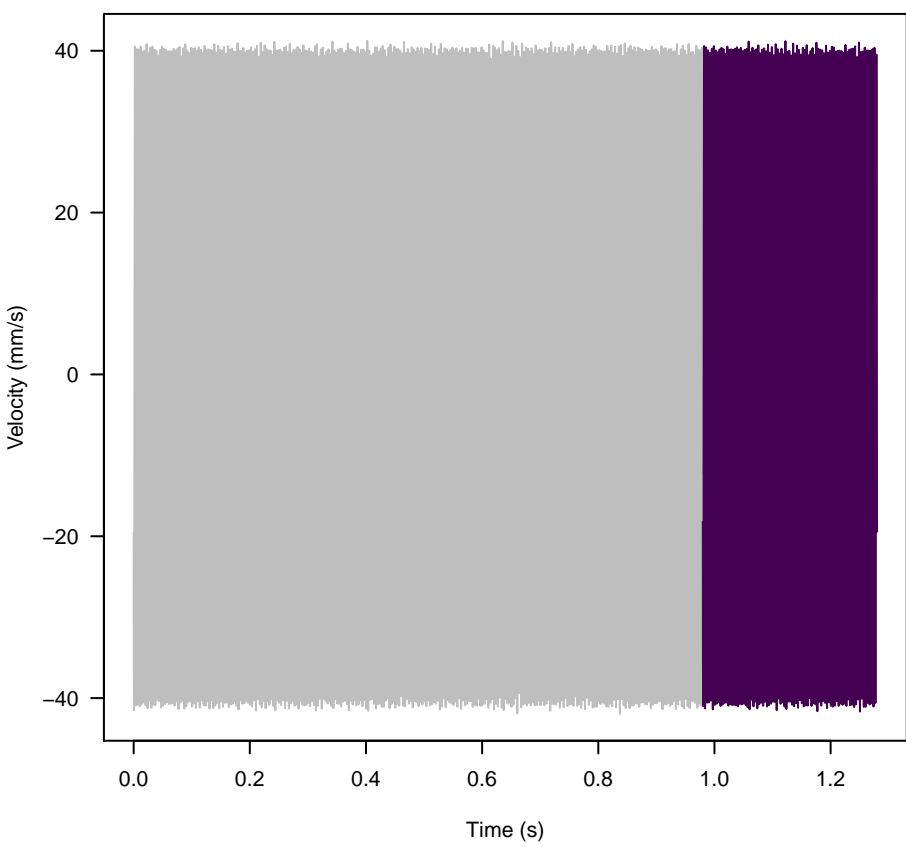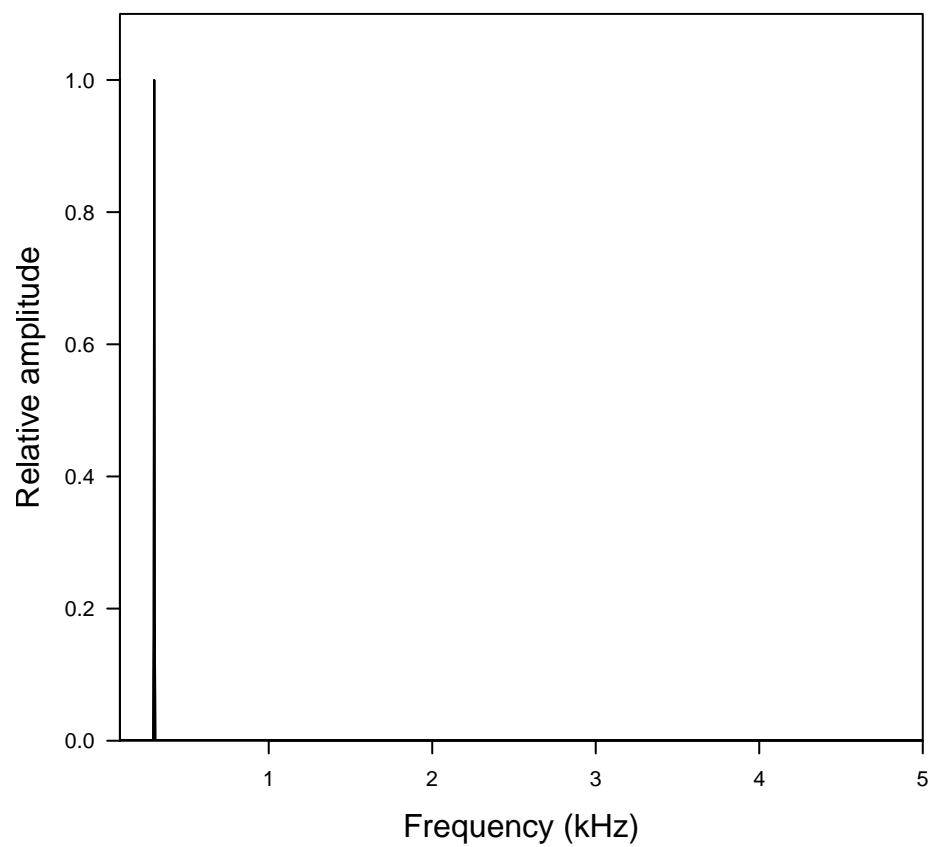



Vel. = 0.057 ; Str. = Corolla ; Axis = x ; Fl. accession = 10-s-77-19

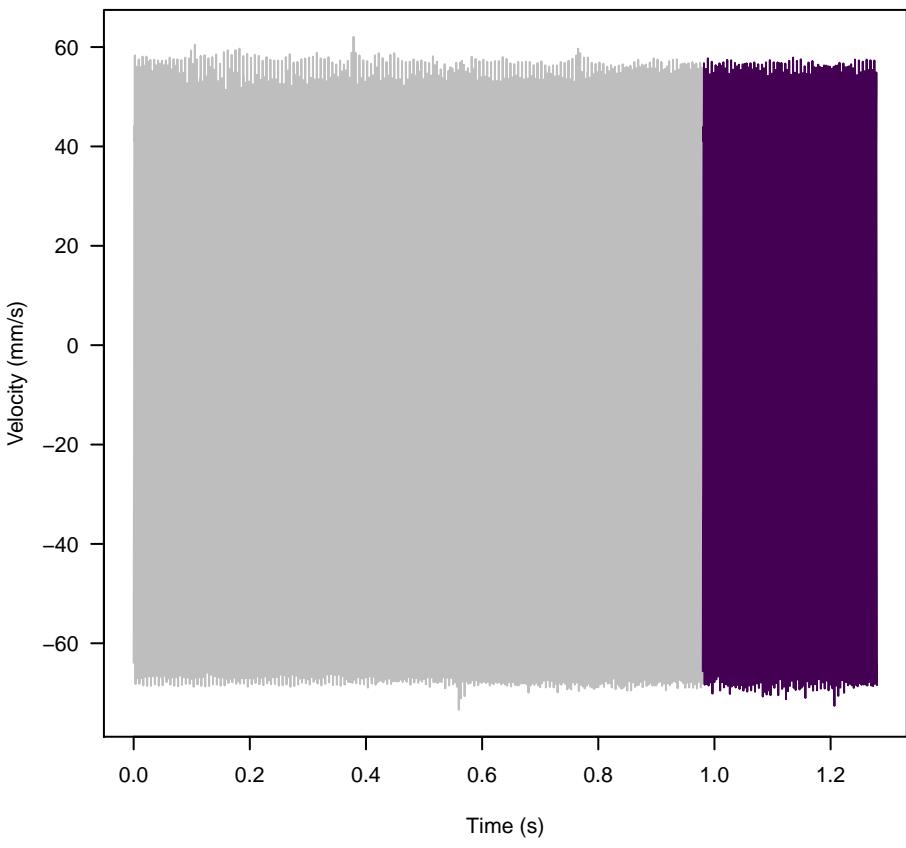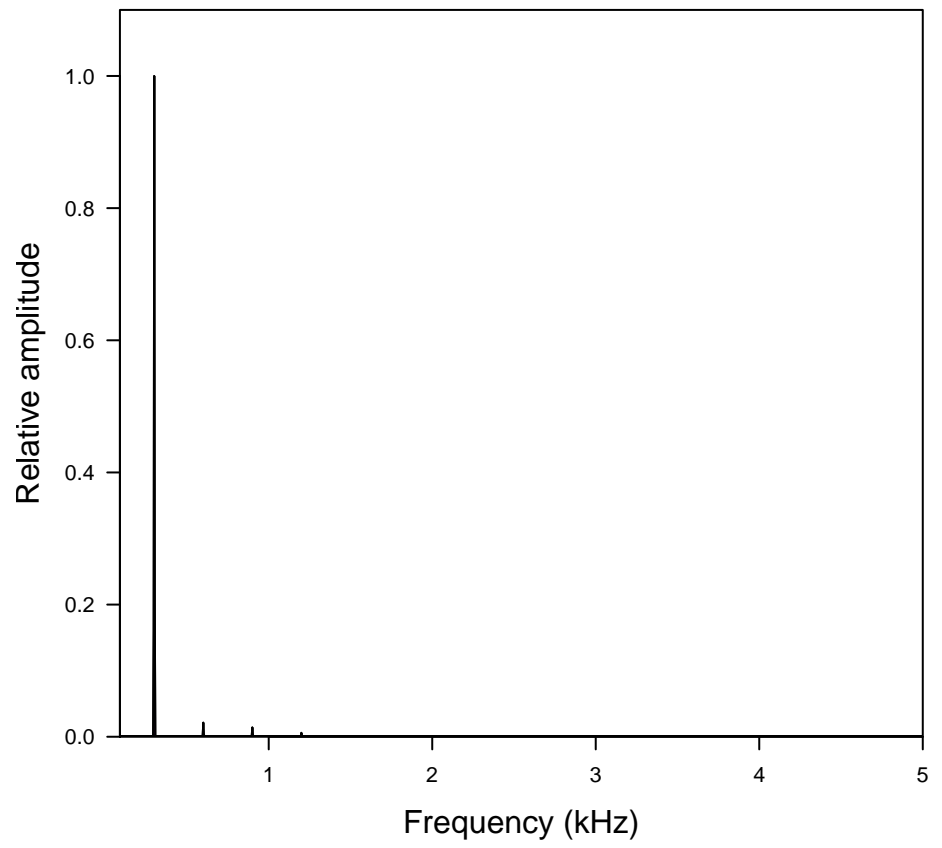

Vel. = 0.057 ; Str. = Receptacle ; Axis = x ; Fl. accession = 10-s-77-19

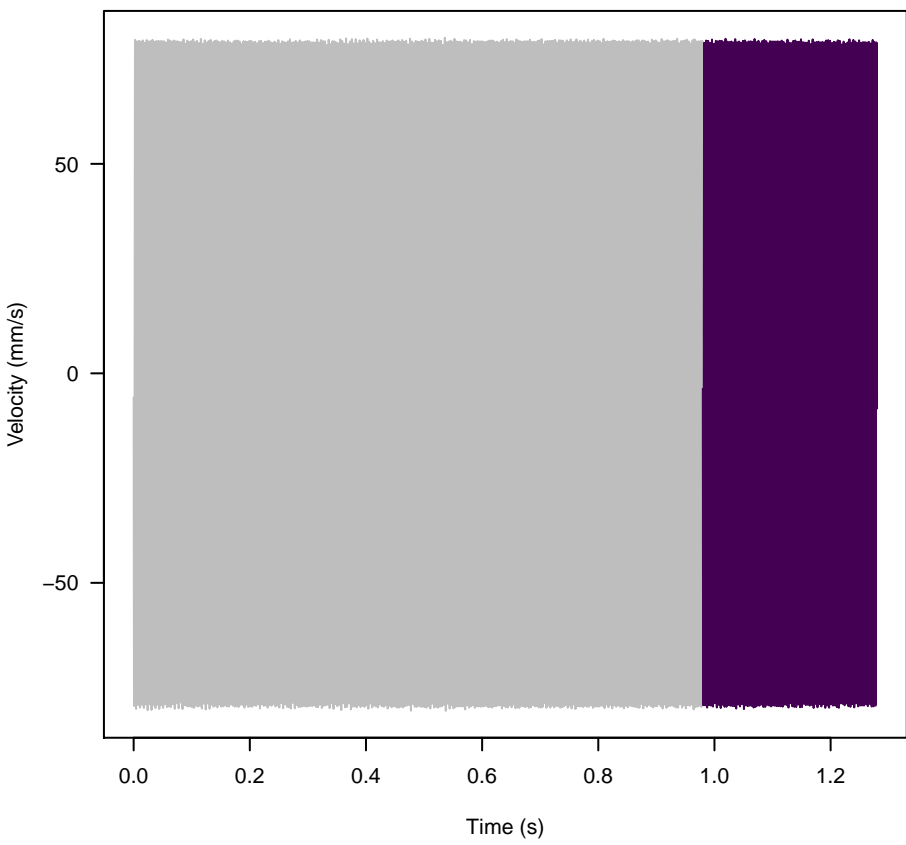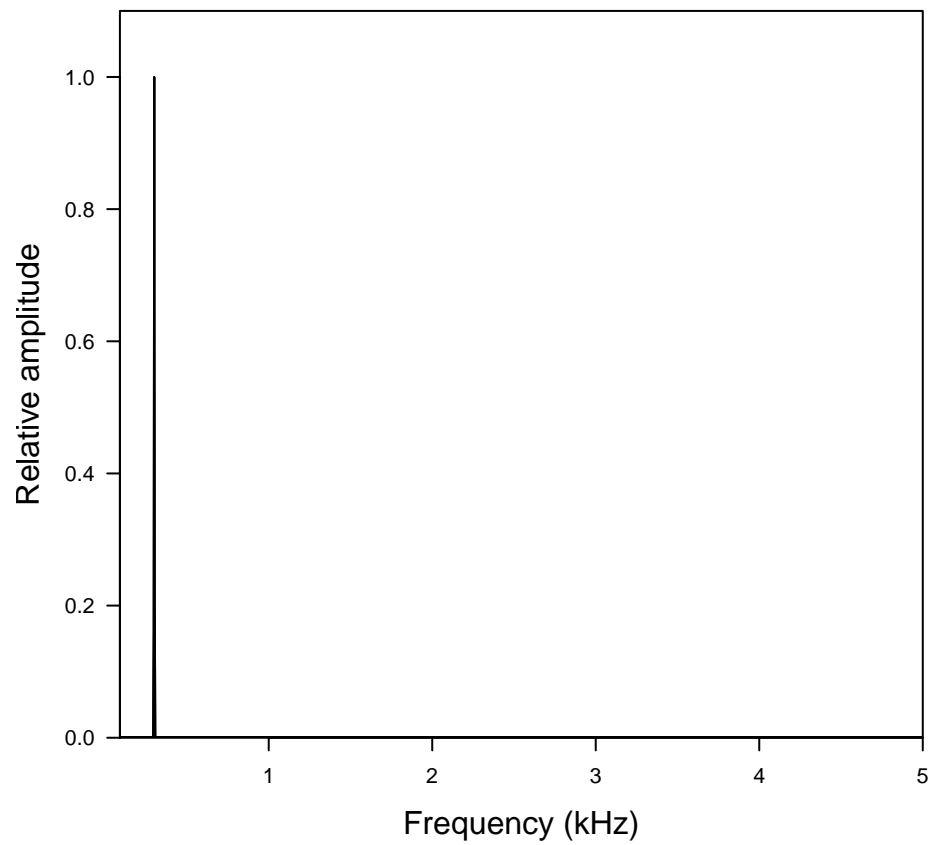

Vel. = 0.057 ; Str. = FA ; Axis = x ; Fl. accession = 10-s-77-19

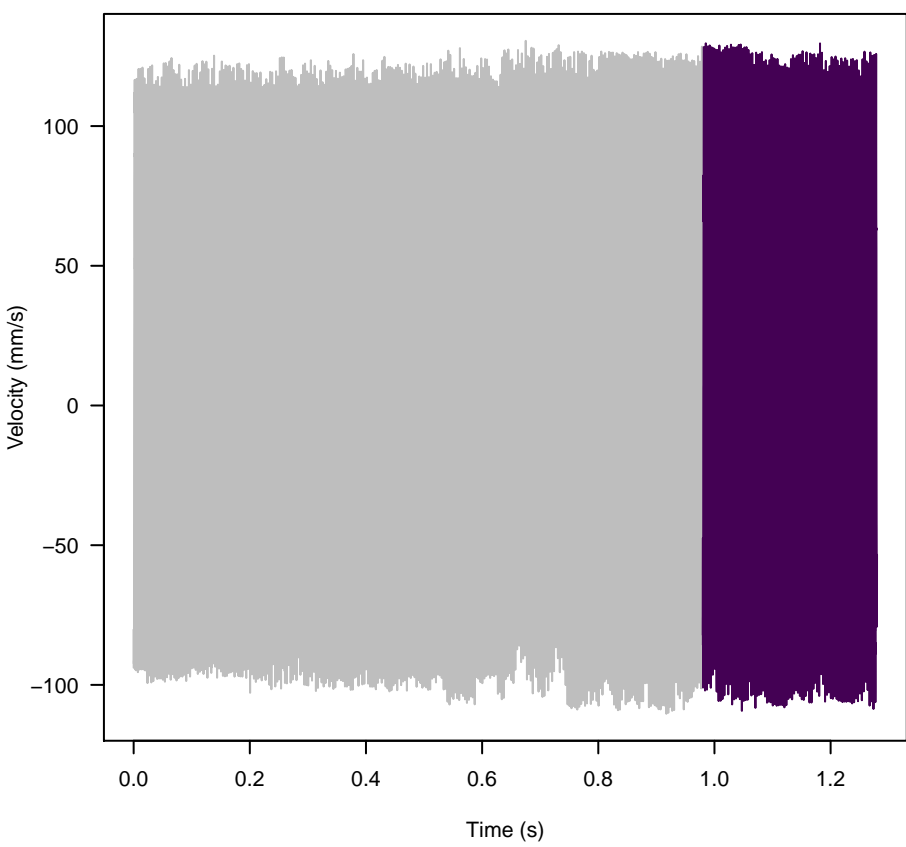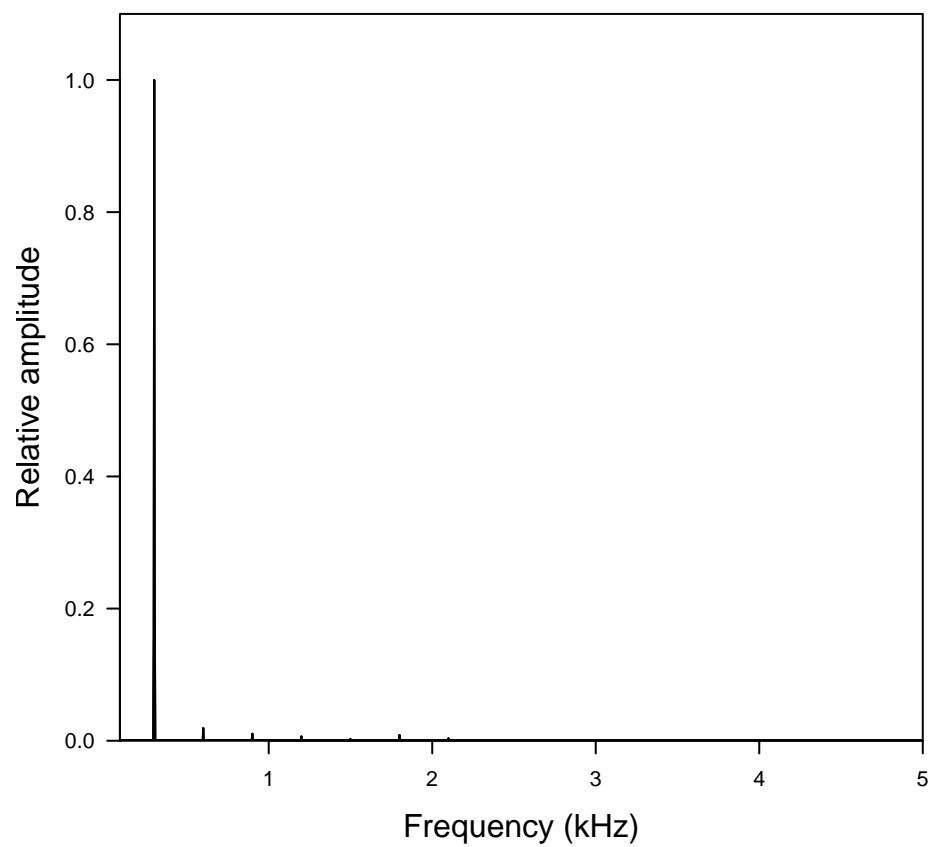

Vel. = 0.057 ; Str. = Receptacle ; Axis = x ; Fl. accession = 10-s-77-19

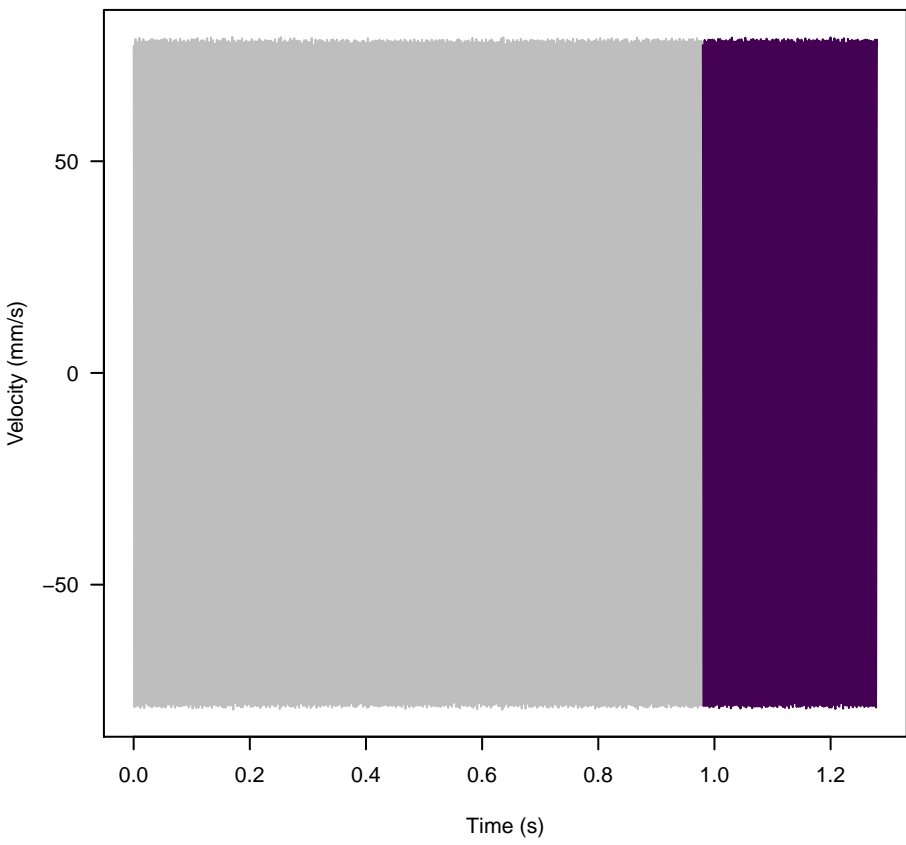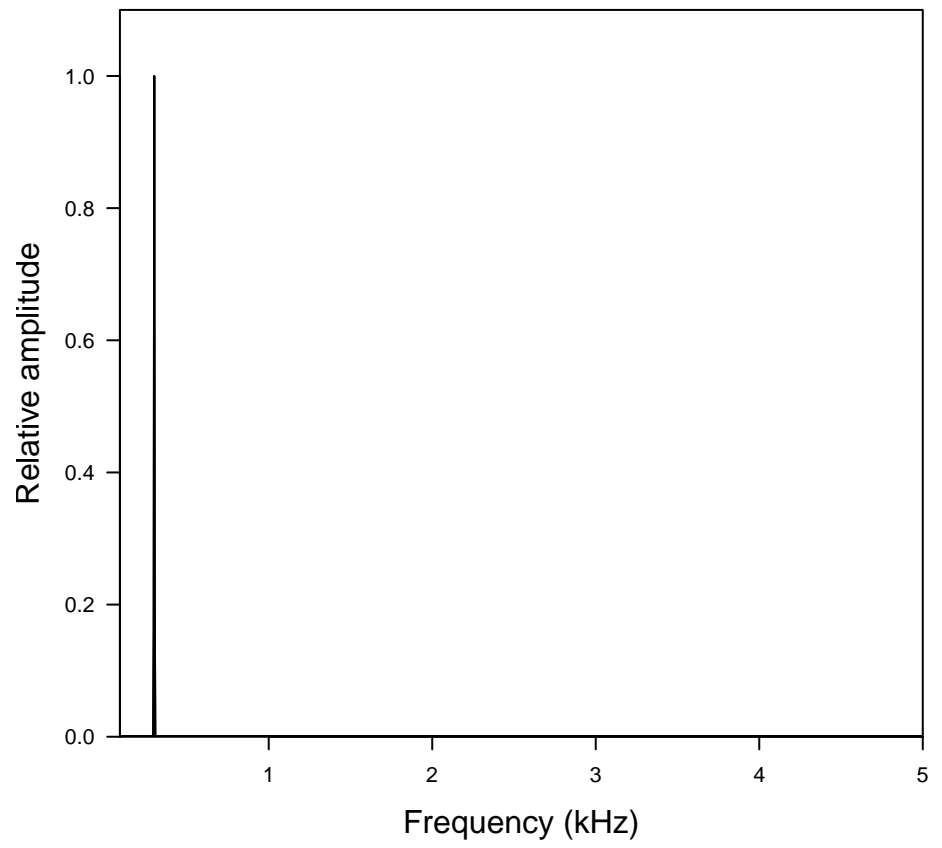

Vel. = 0.057 ; Str. = PA ; Axis = x ; Fl. accession = 10-s-77-19

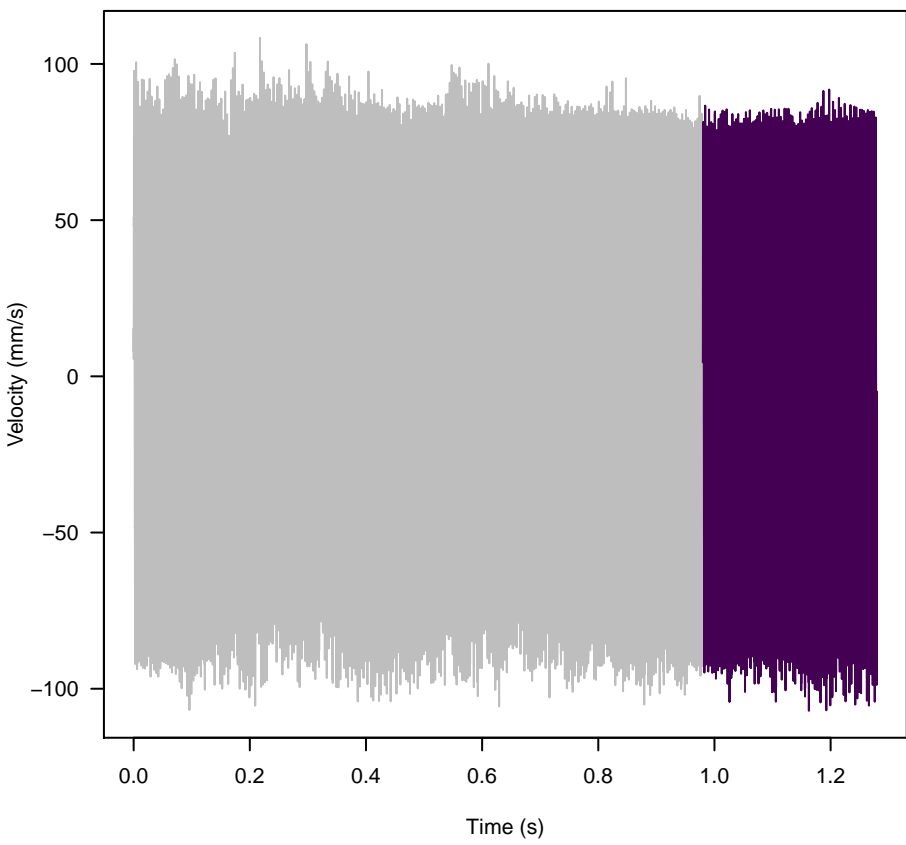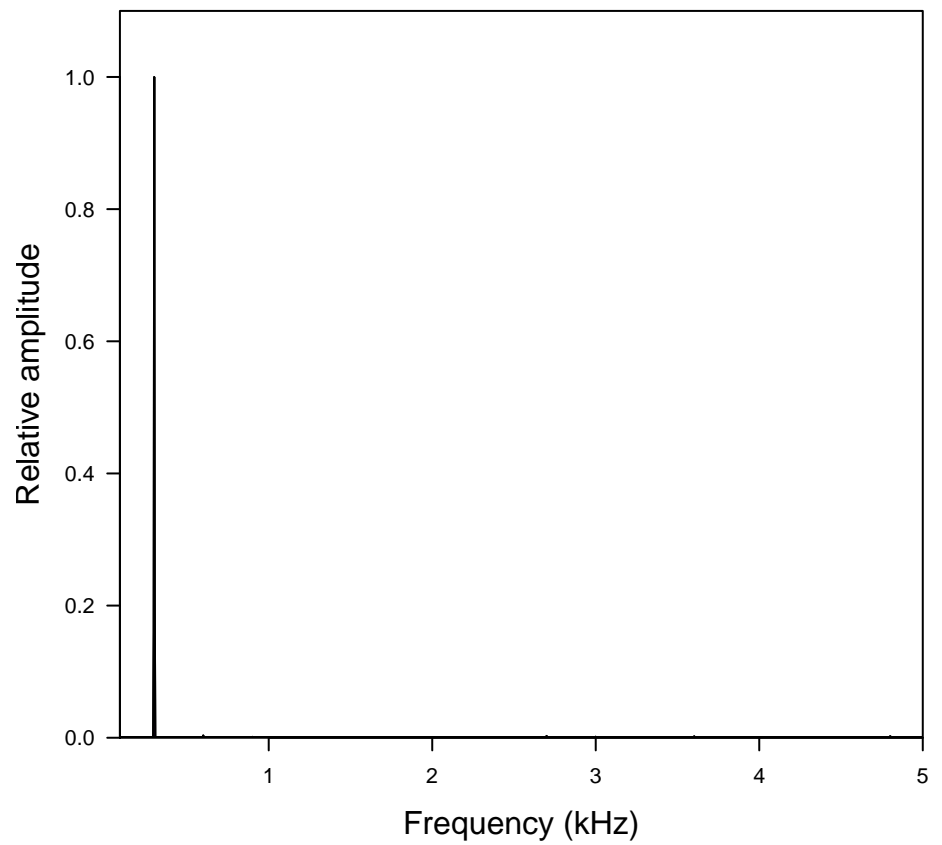

Vel. = 0.057 ; Str. = Receptacle ; Axis = x ; Fl. accession = 10-s-77-19

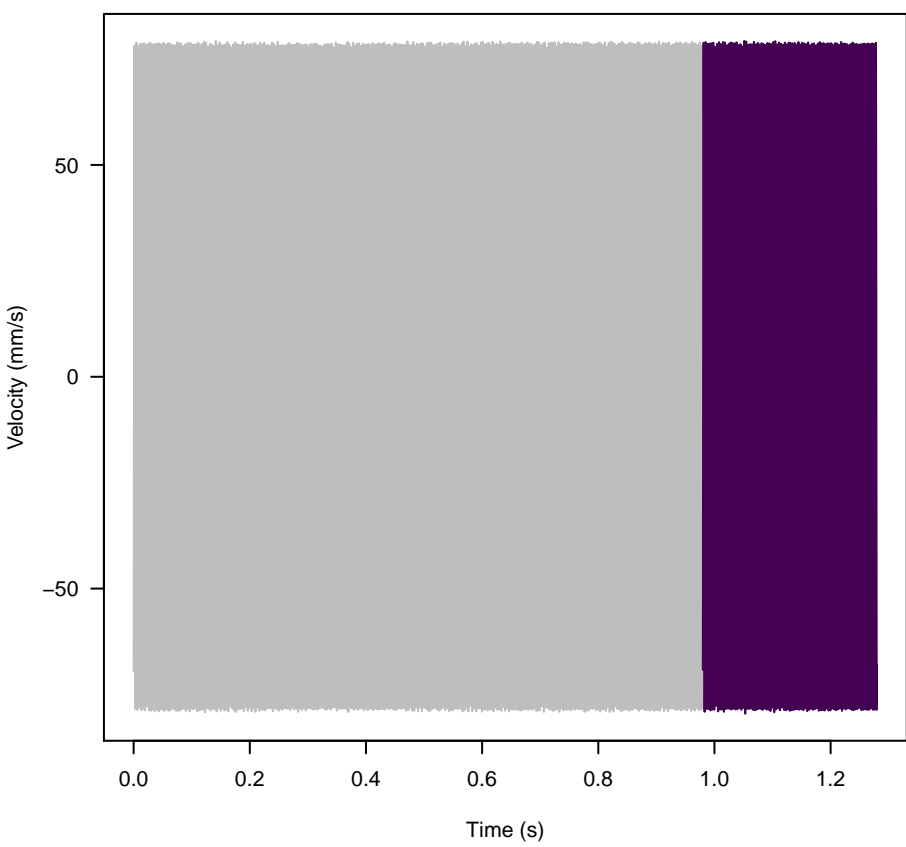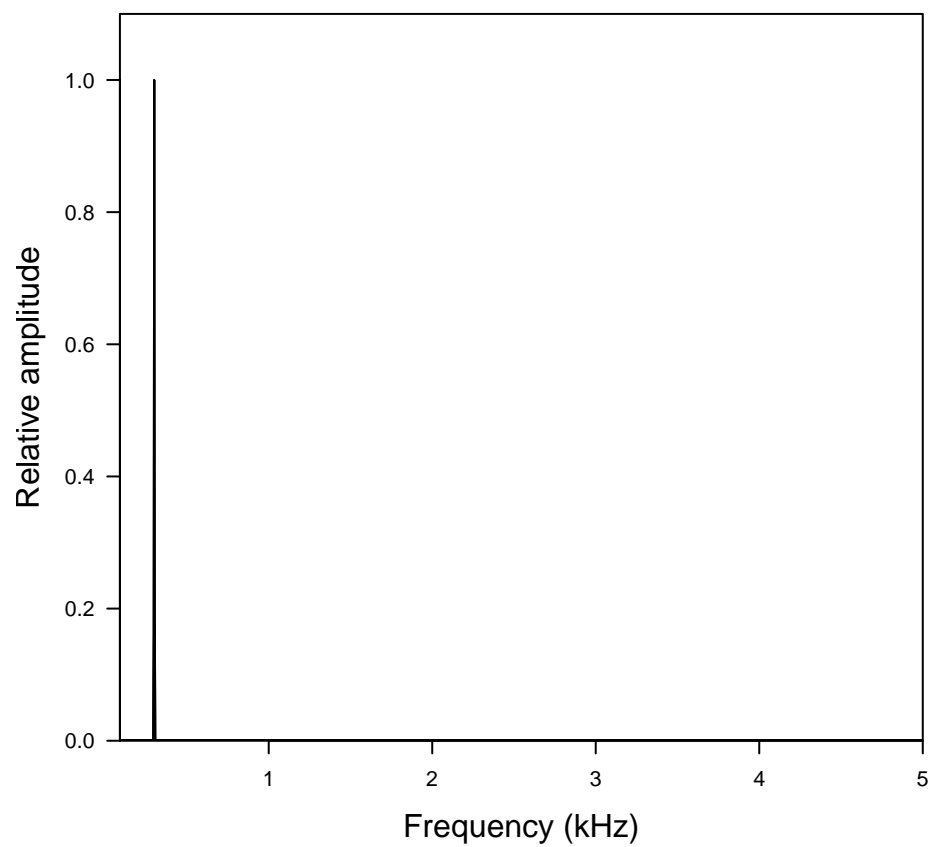

Vel. = 0.057 ; Str. = Corolla ; Axis = z ; Fl. accession = 10-s-77-19

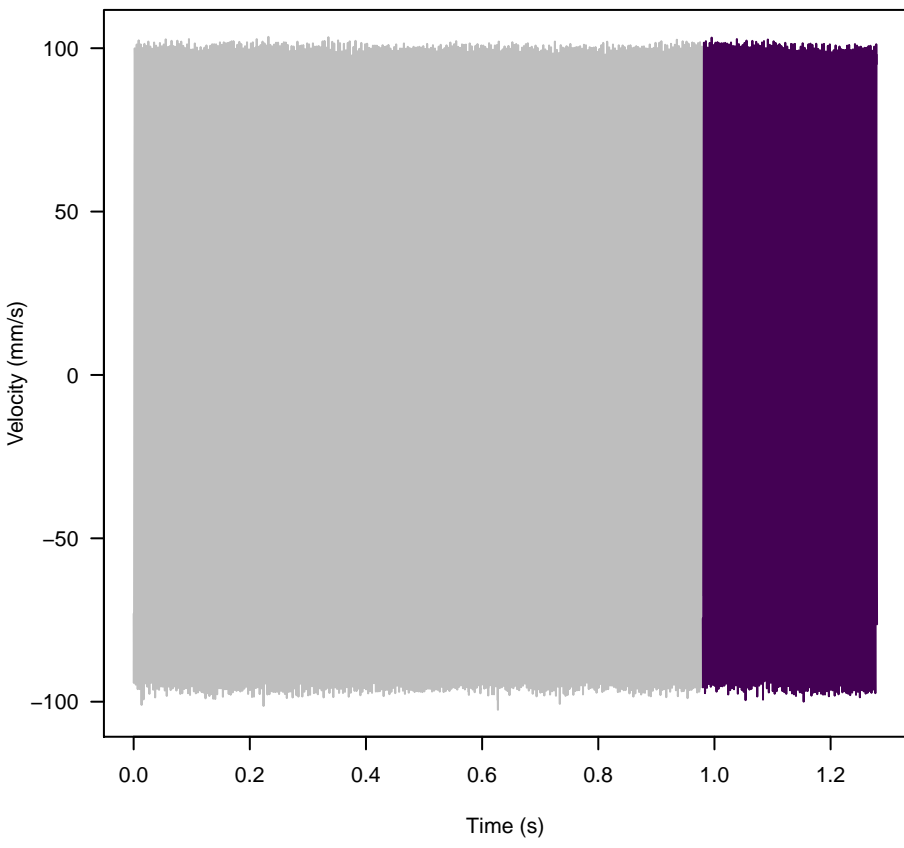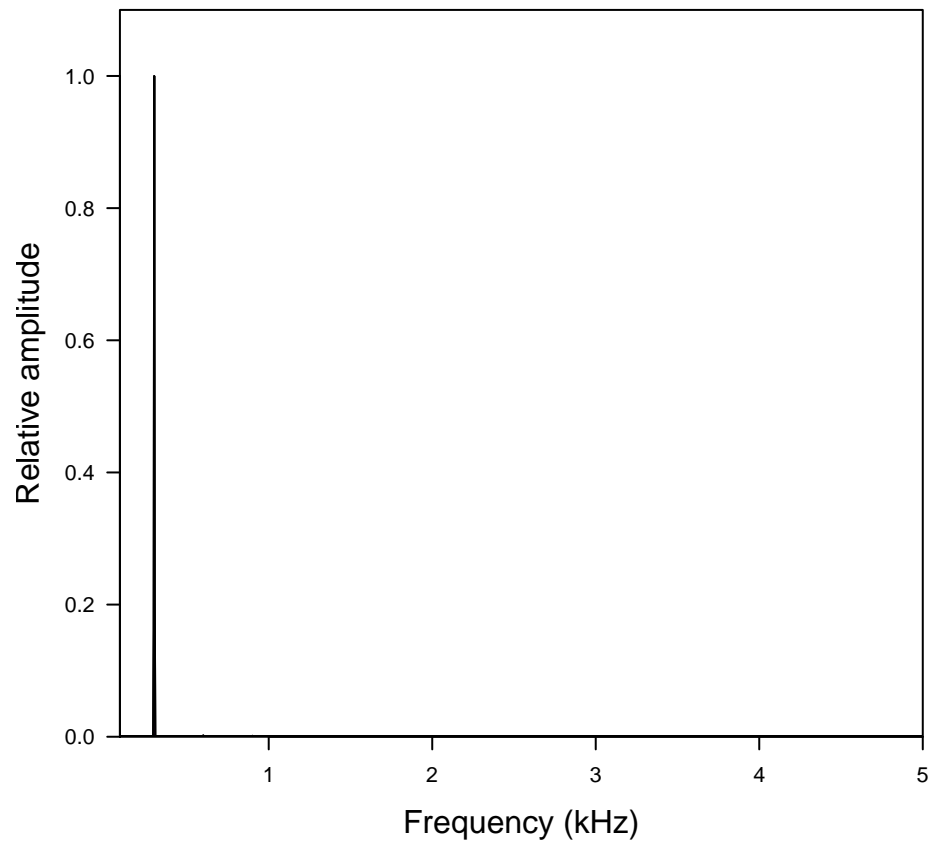

Vel. = 0.057 ; Str. = Receptacle ; Axis = z ; Fl. accession = 10-s-77-19

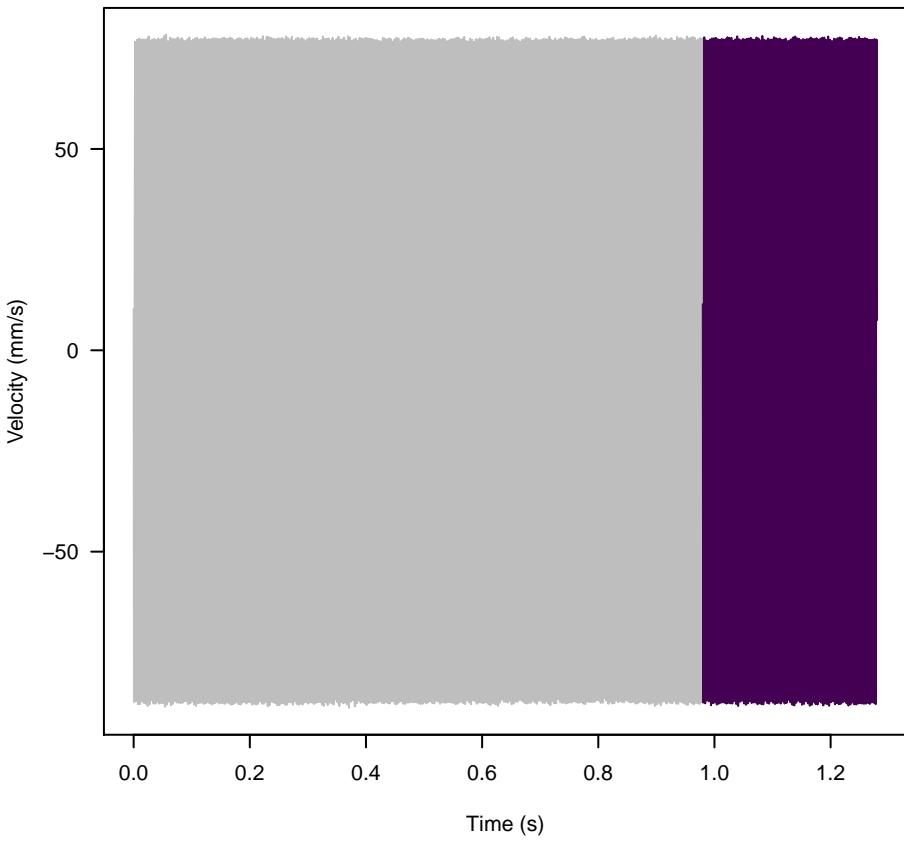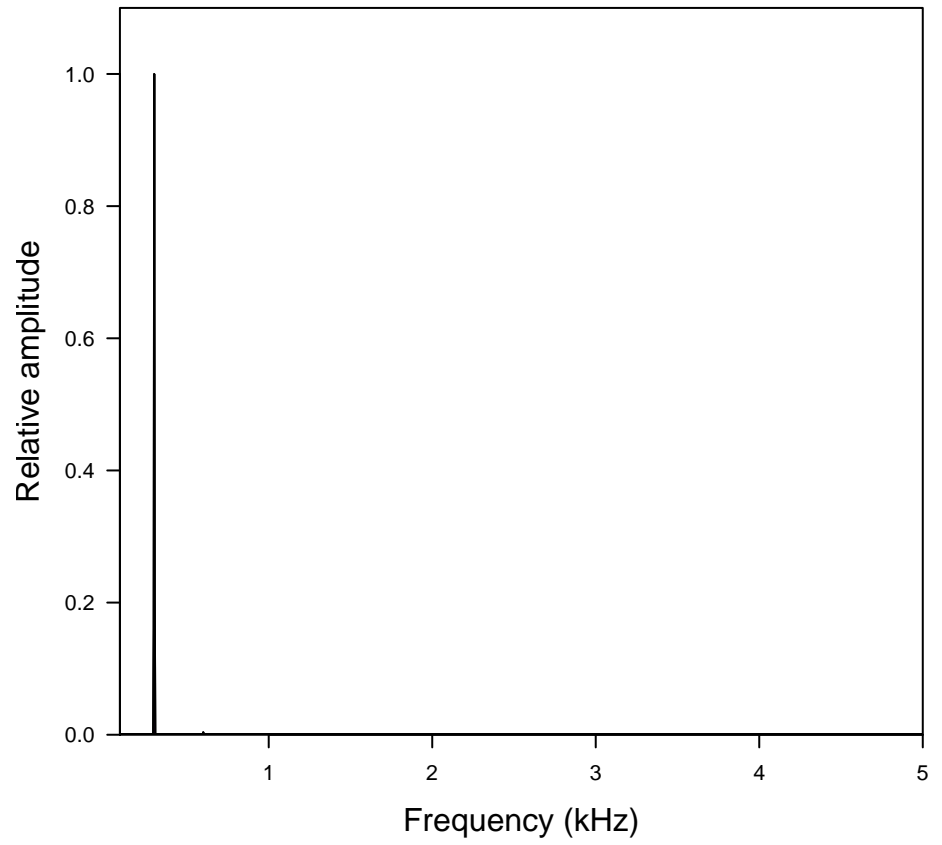

Vel. = 0.057 ; Str. = FA ; Axis = z ; Fl. accession = 10-s-77-19

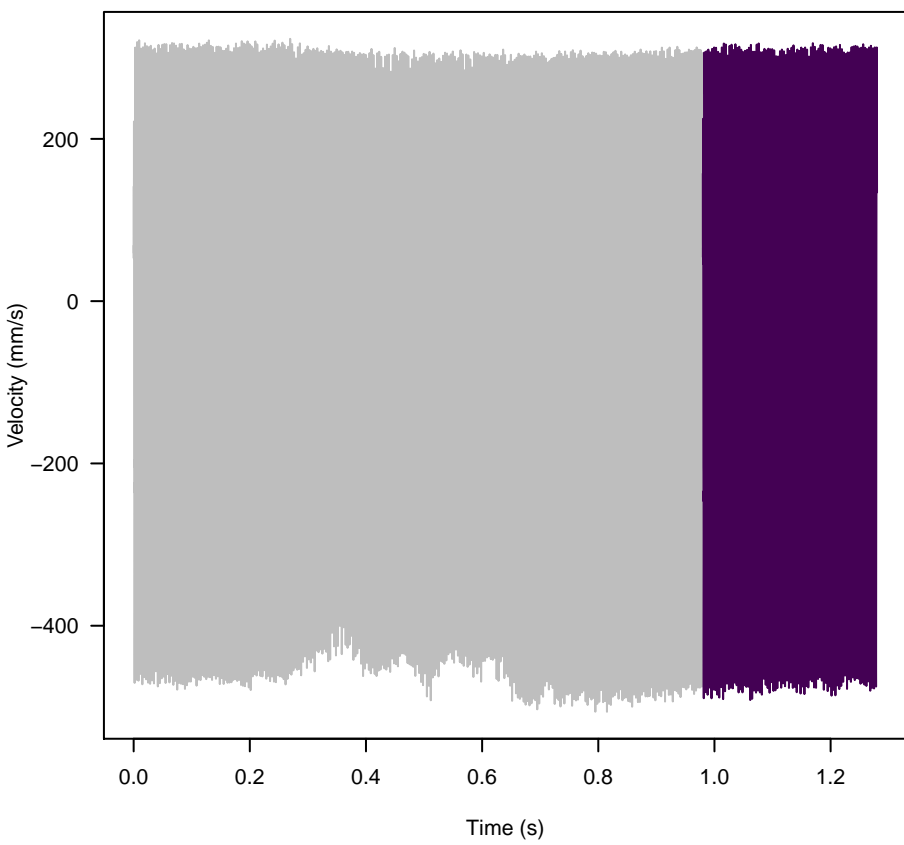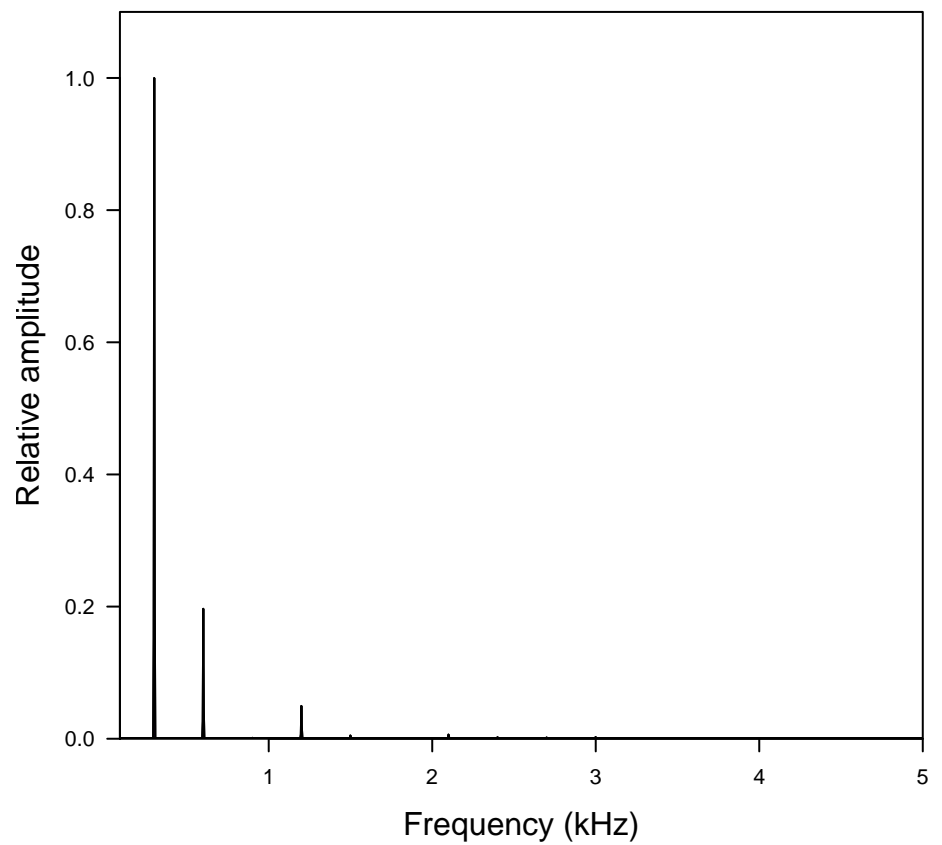

Vel. = 0.057 ; Str. = Receptacle ; Axis = z ; Fl. accession = 10-s-77-19

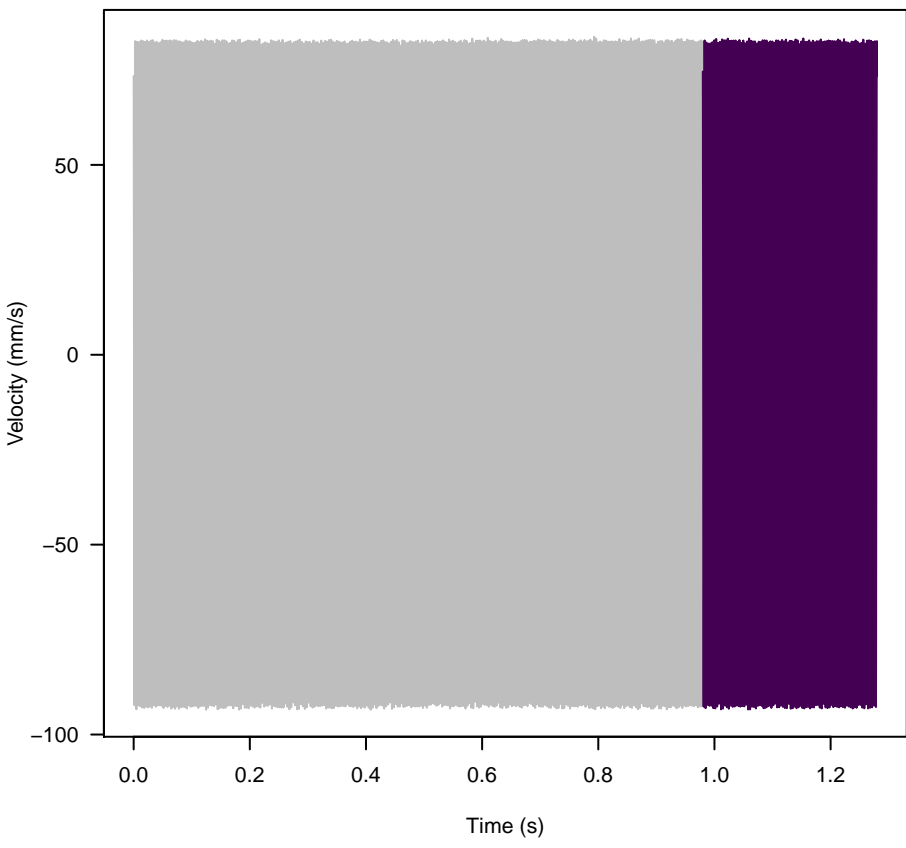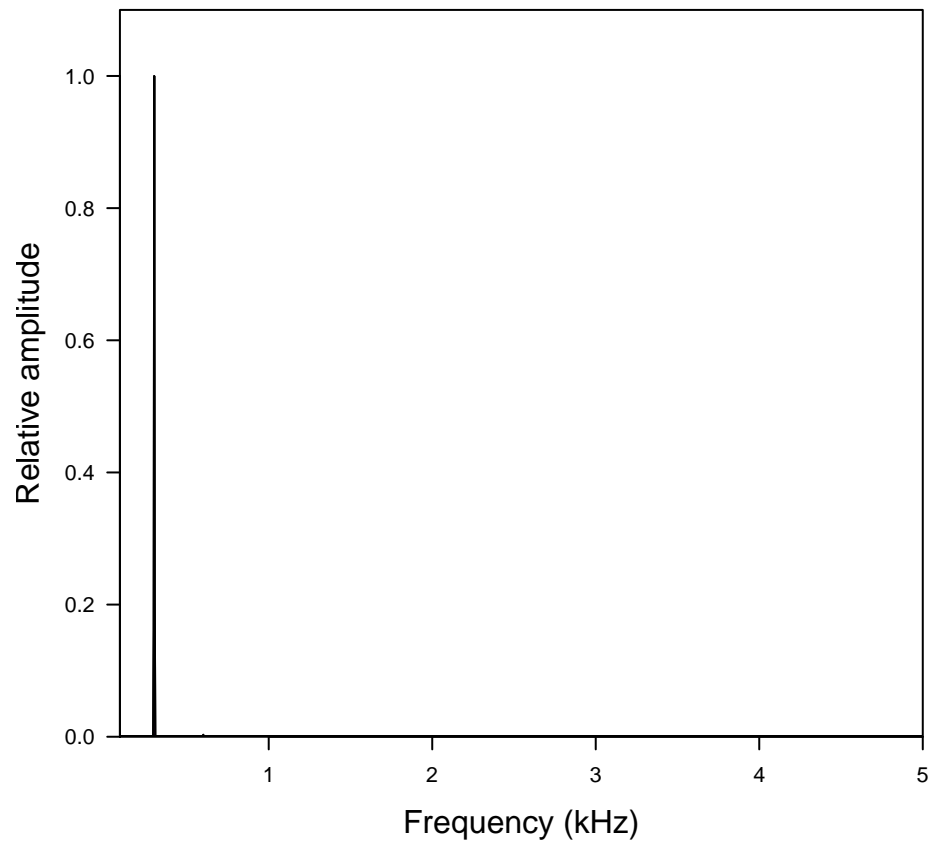

Vel. = 0.057 ; Str. = PA ; Axis = z ; Fl. accession = 10-s-77-19

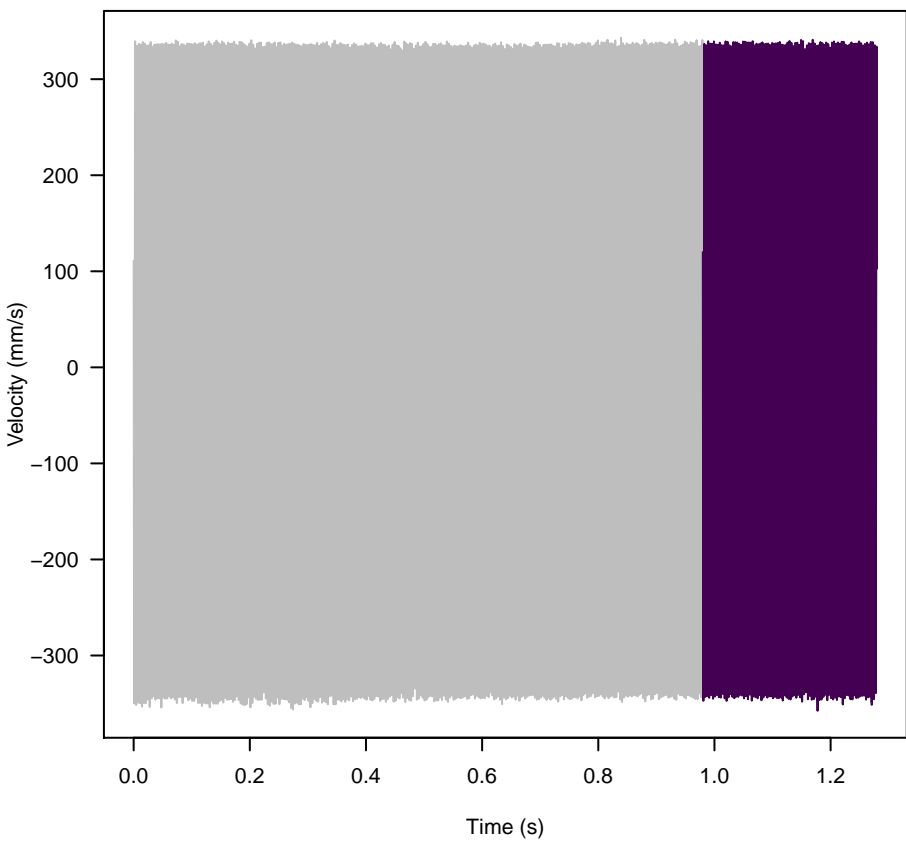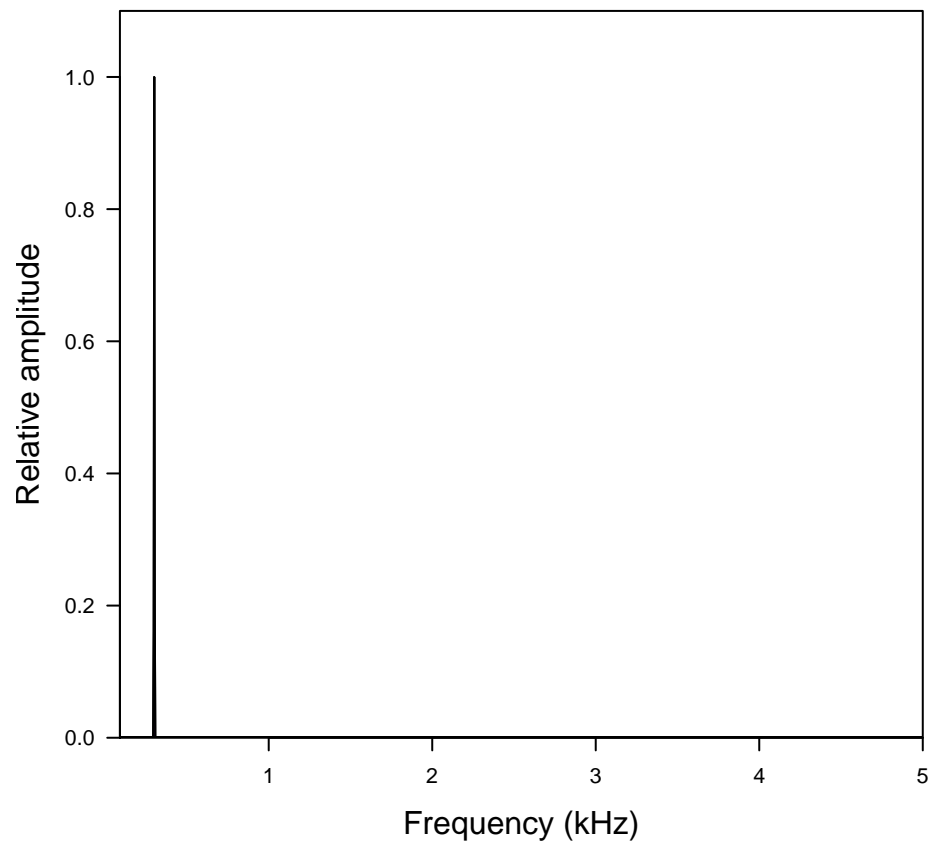

Vel. = 0.057 ; Str. = Receptacle ; Axis = z ; Fl. accession = 10-s-77-19

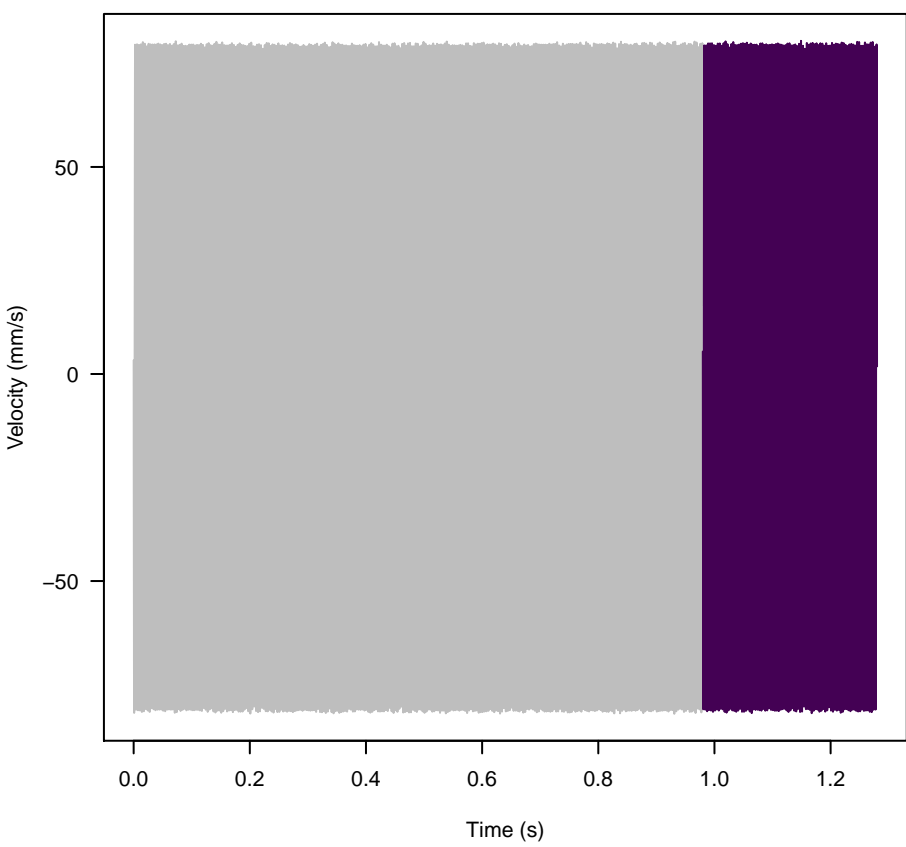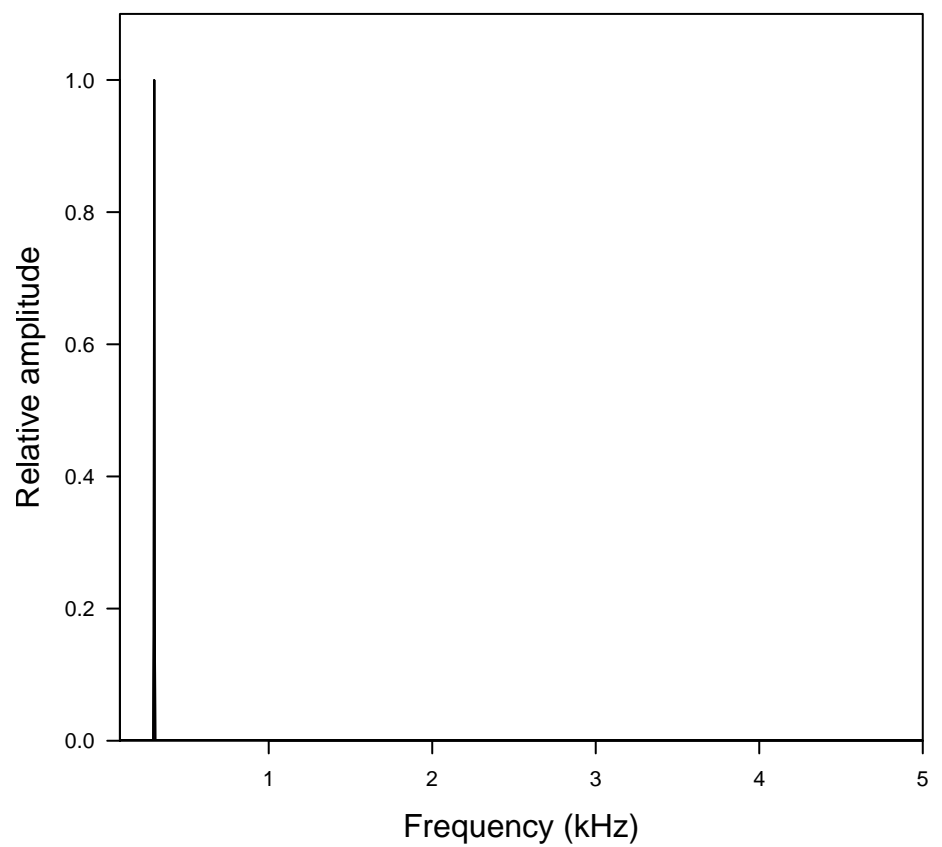

Vel. = 0.028 ; Str. = PA ; Axis = z ; Fl. accession = 10-s-77-19

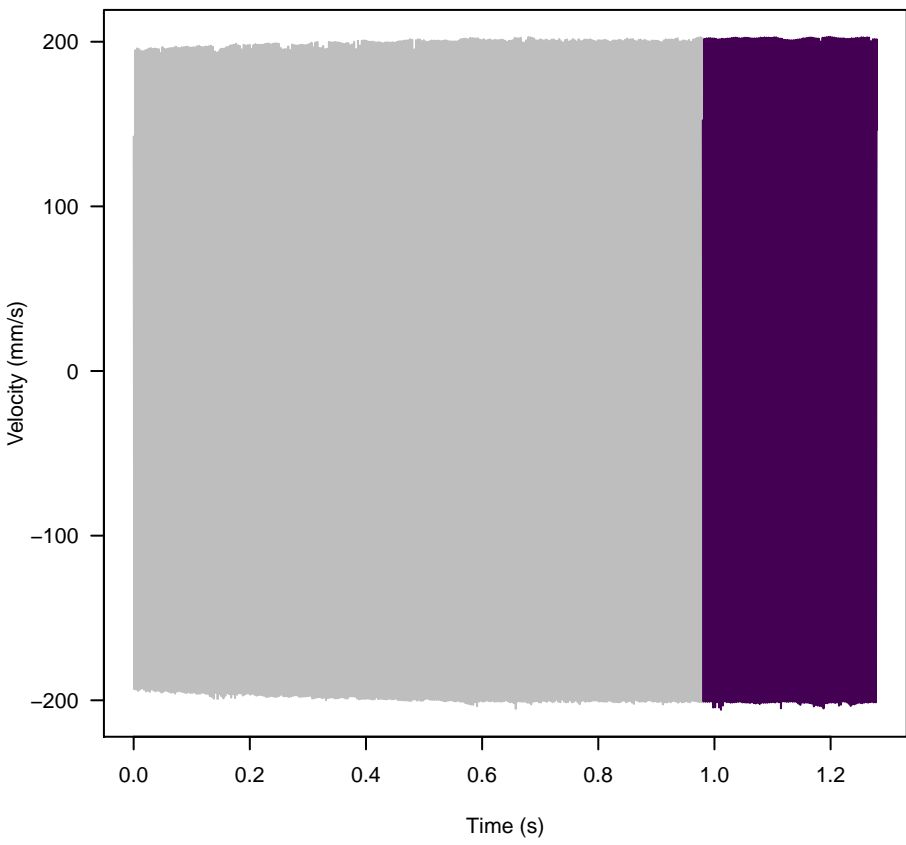

Vel. = 0.028 ; Str. = Receptacle ; Axis = z ; Fl. accession = 10-s-77-19

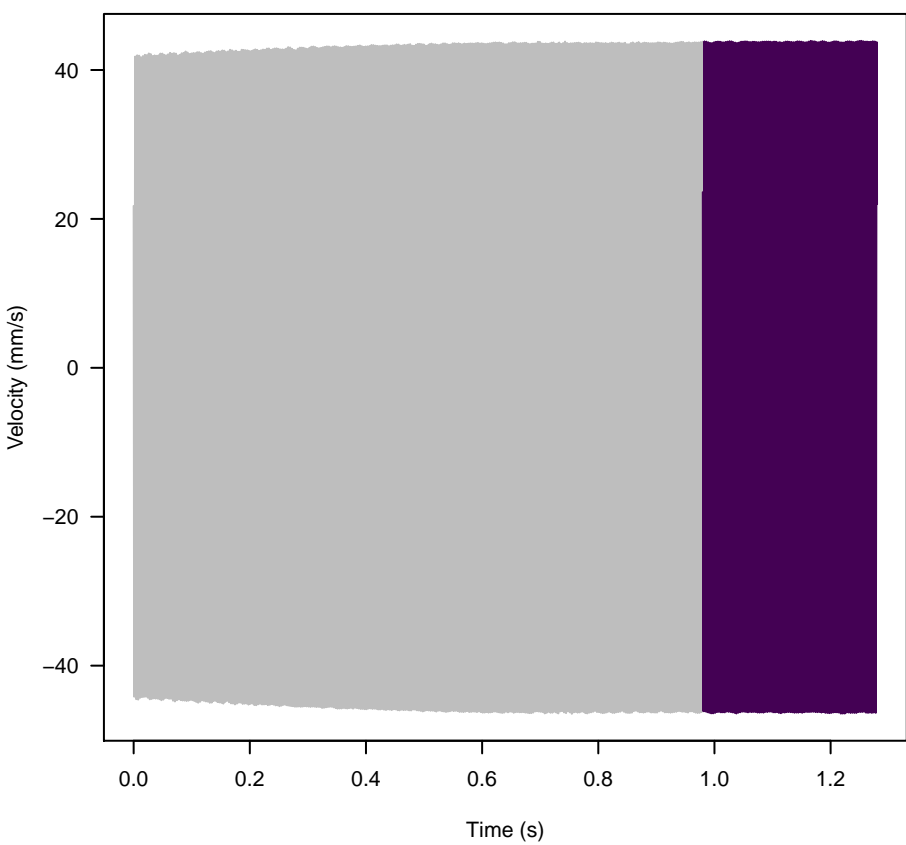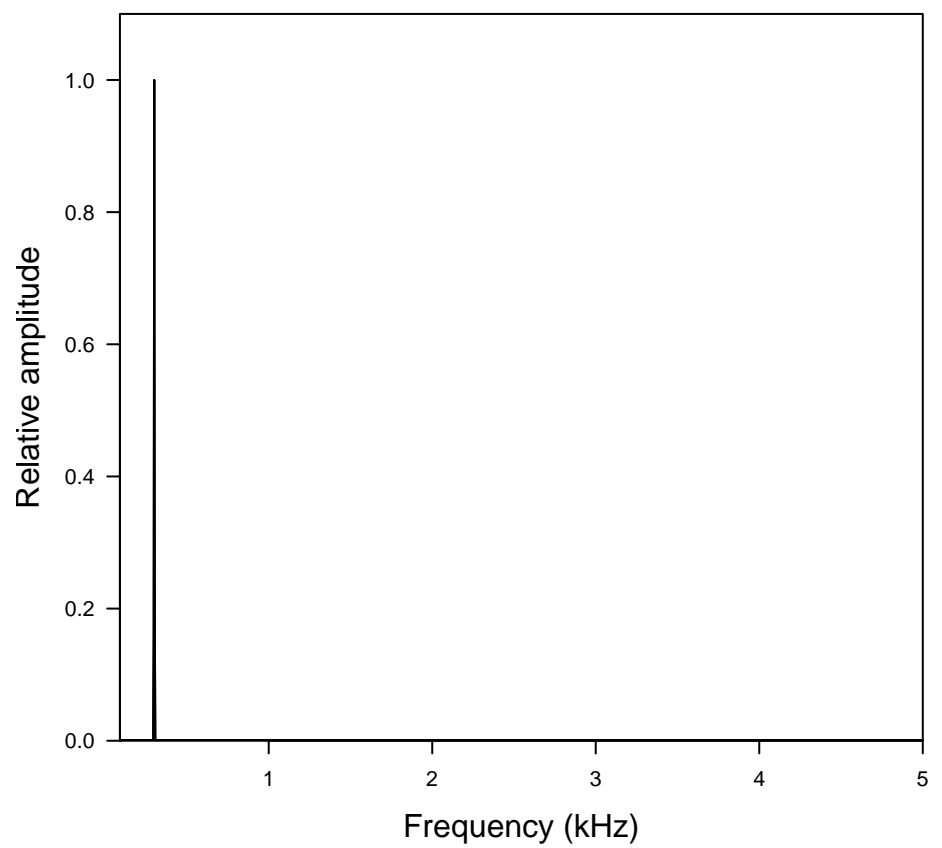

Vel. = 0.028 ; Str. = FA ; Axis = z ; Fl. accession = 10-s-77-19

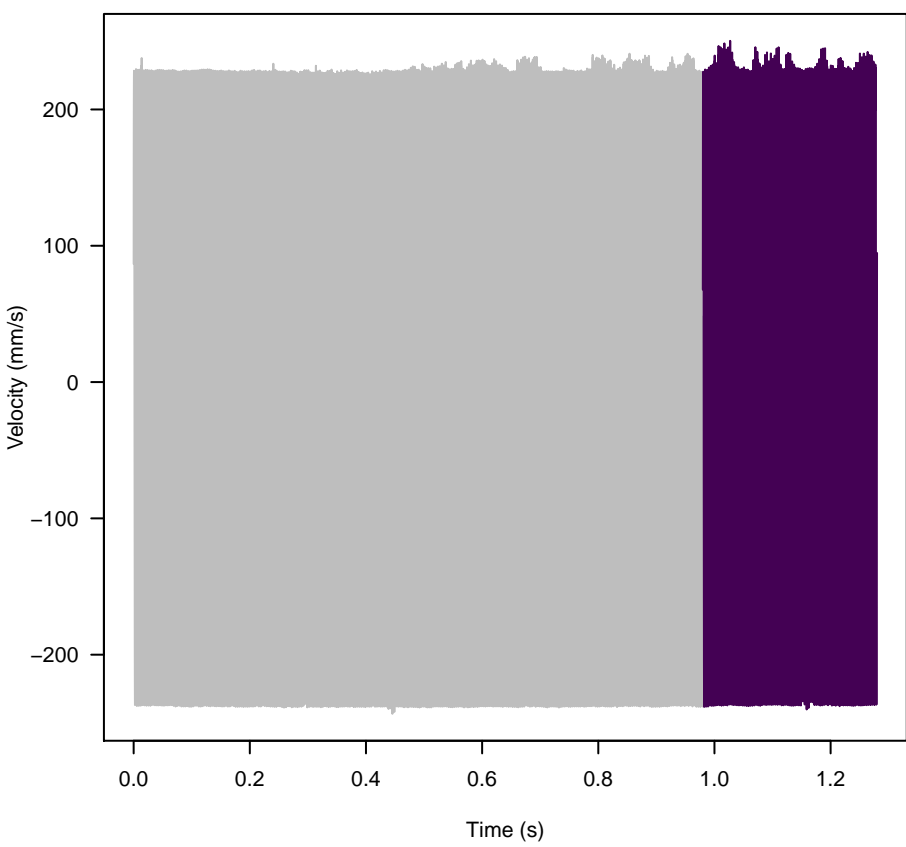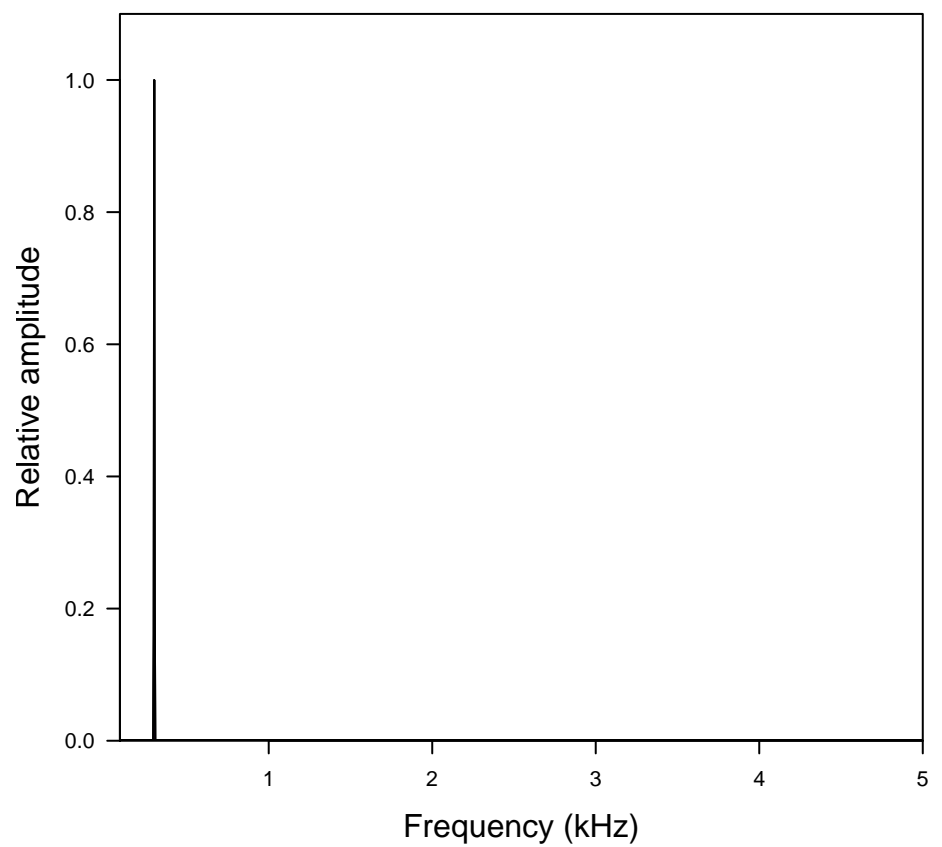

Vel. = 0.028 ; Str. = Receptacle ; Axis = z ; Fl. accession = 10-s-77-19

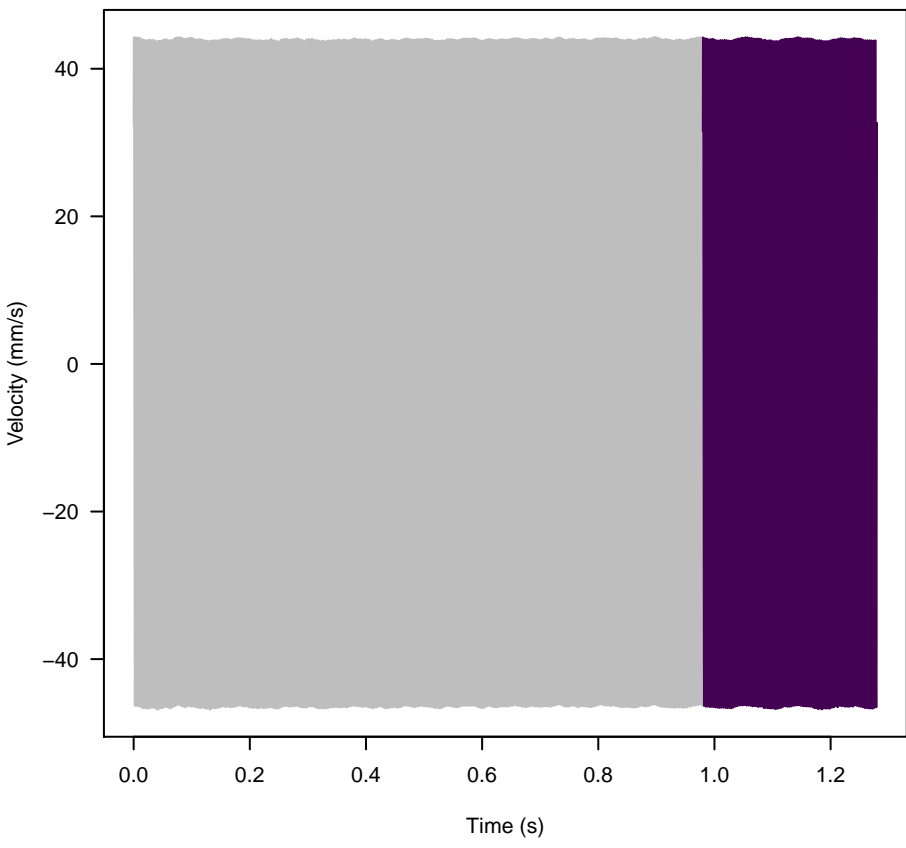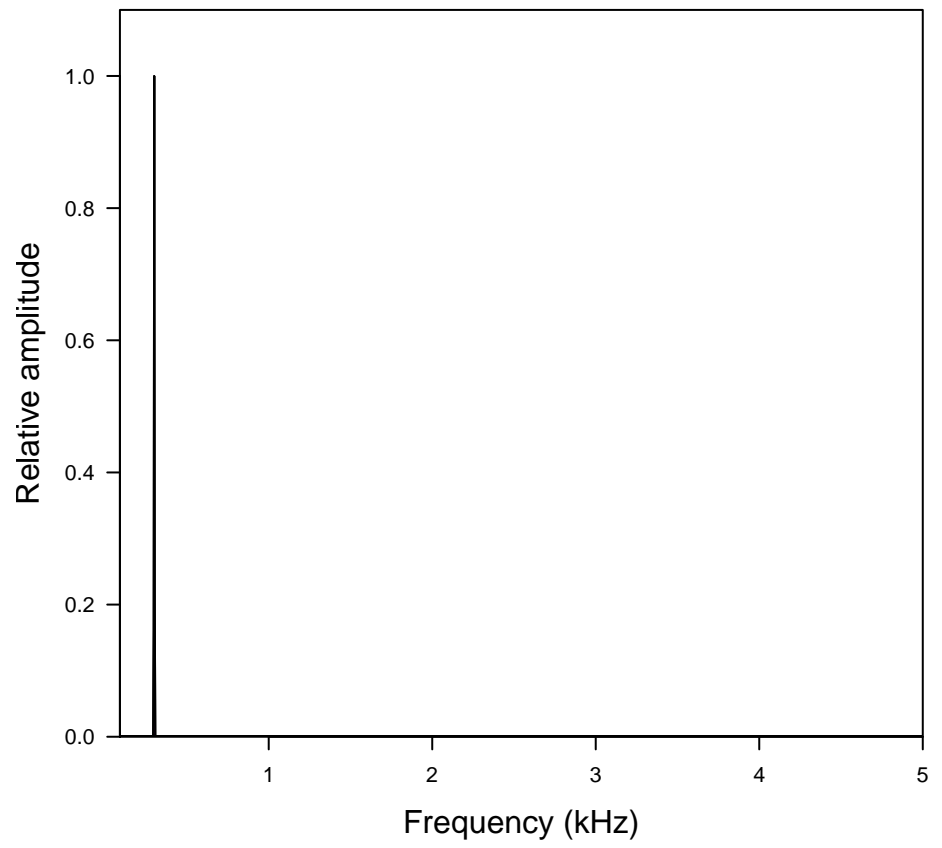

Vel. = 0.028 ; Str. = Corolla ; Axis = z ; Fl. accession = 10-s-77-19

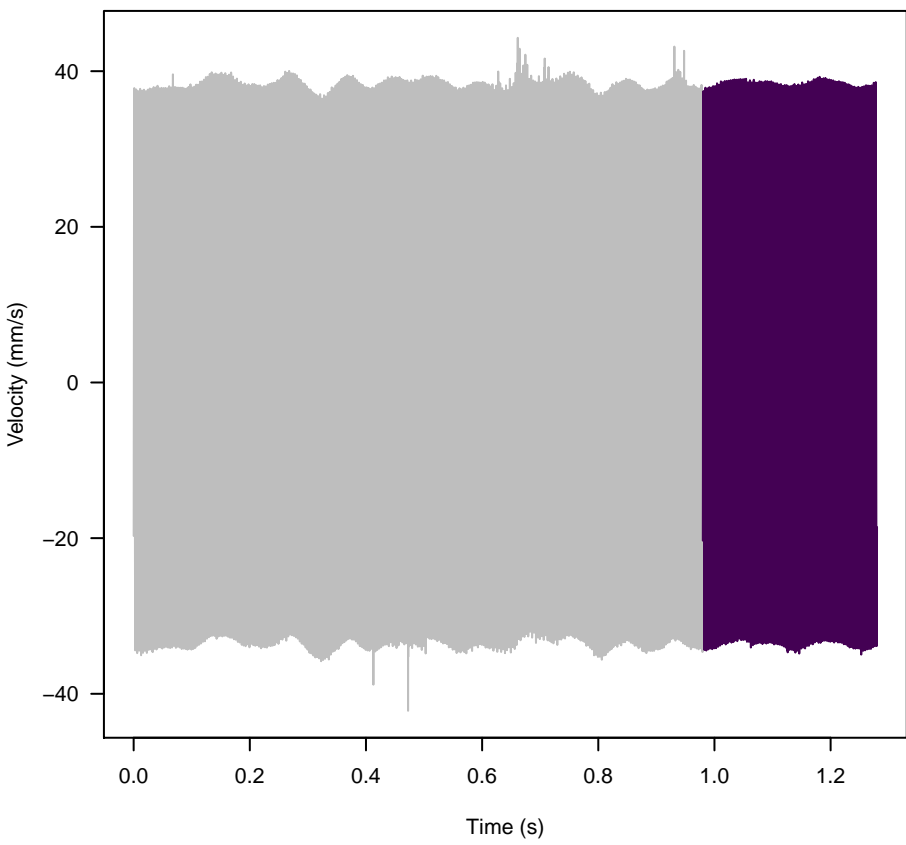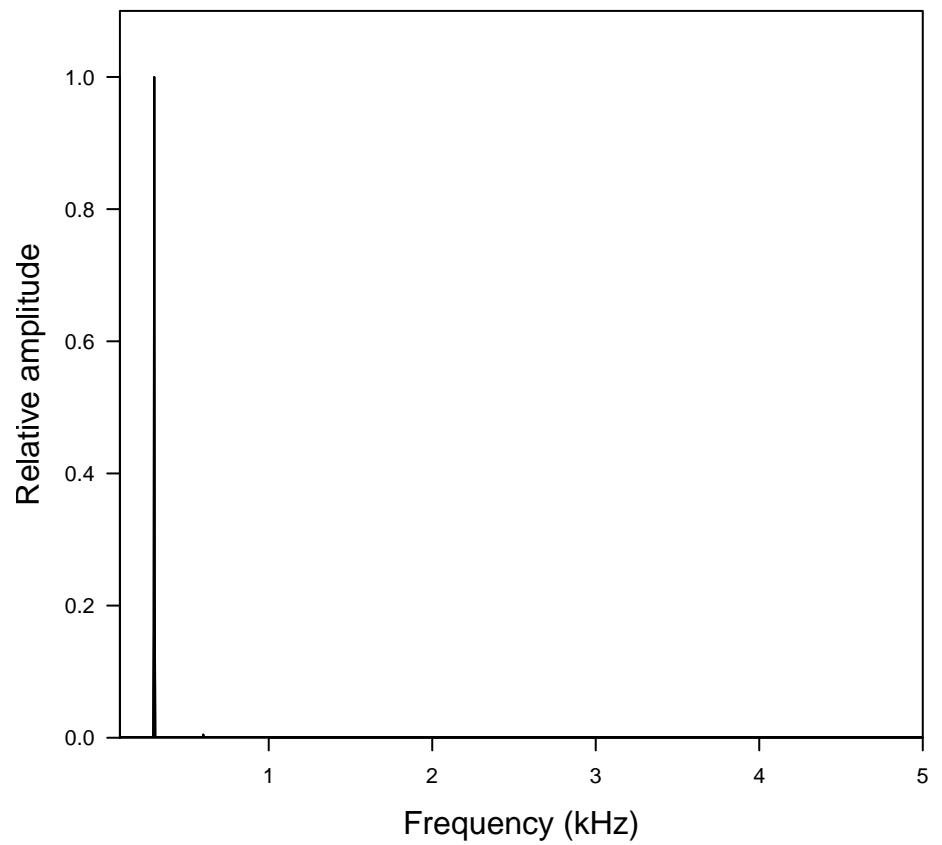

Vel. = 0.028 ; Str. = Receptacle ; Axis = z ; Fl. accession = 10-s-77-19

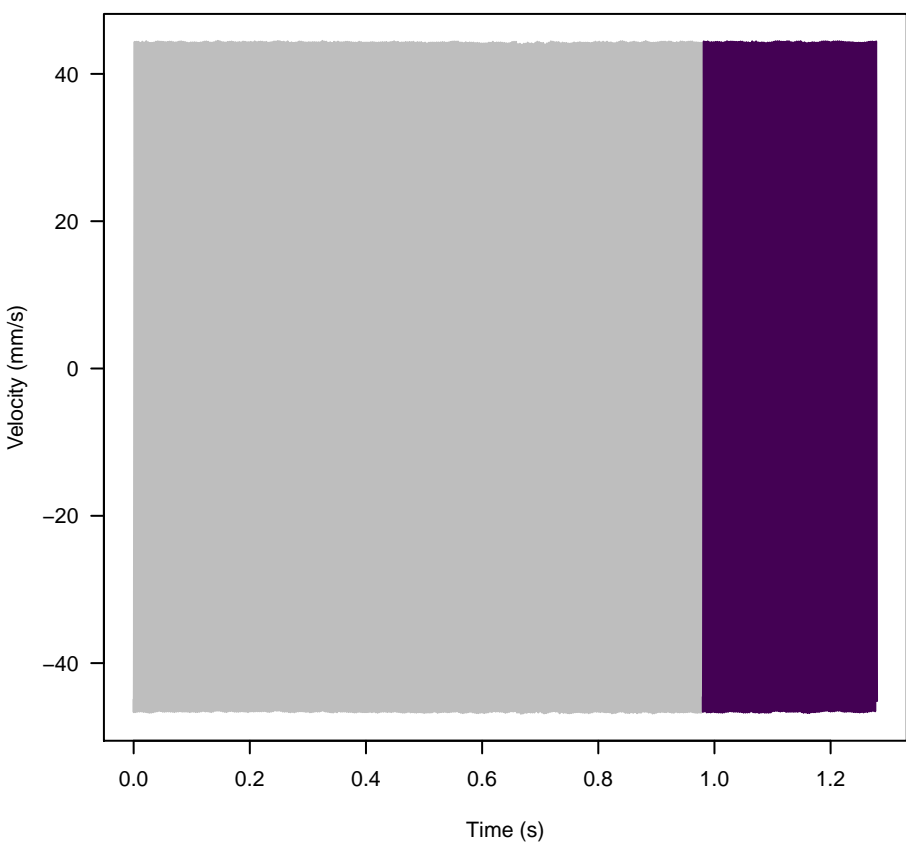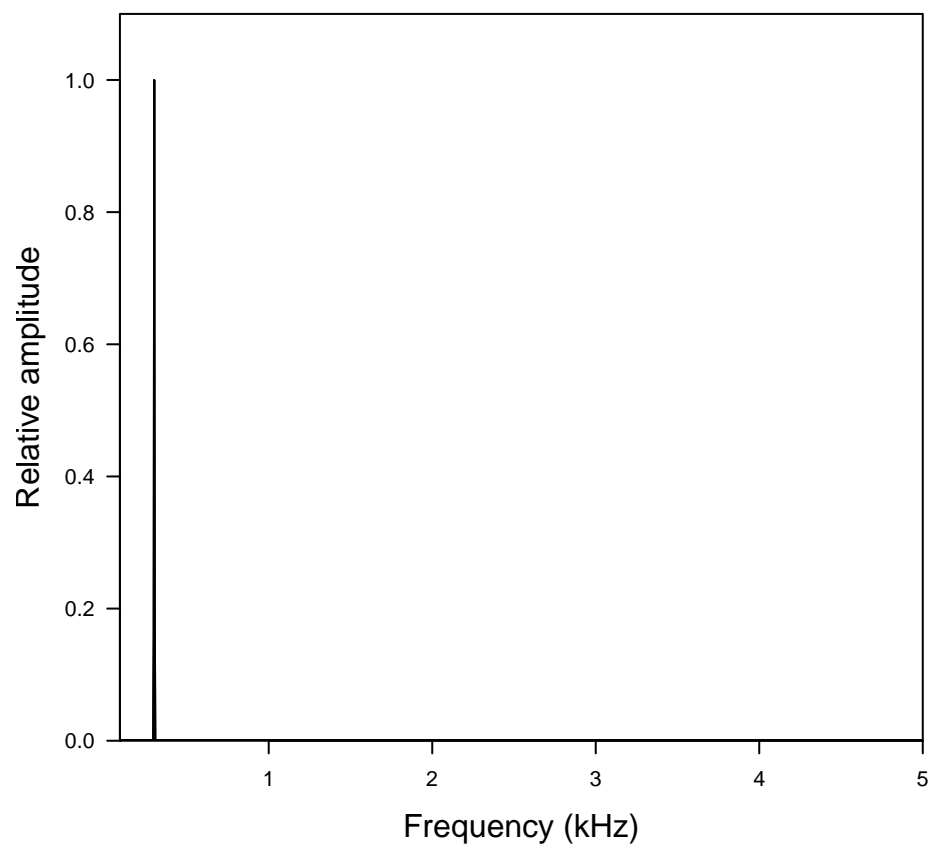

Vel. = 0.014 ; Str. = Corolla ; Axis = z ; Fl. accession = 10-s-77-19

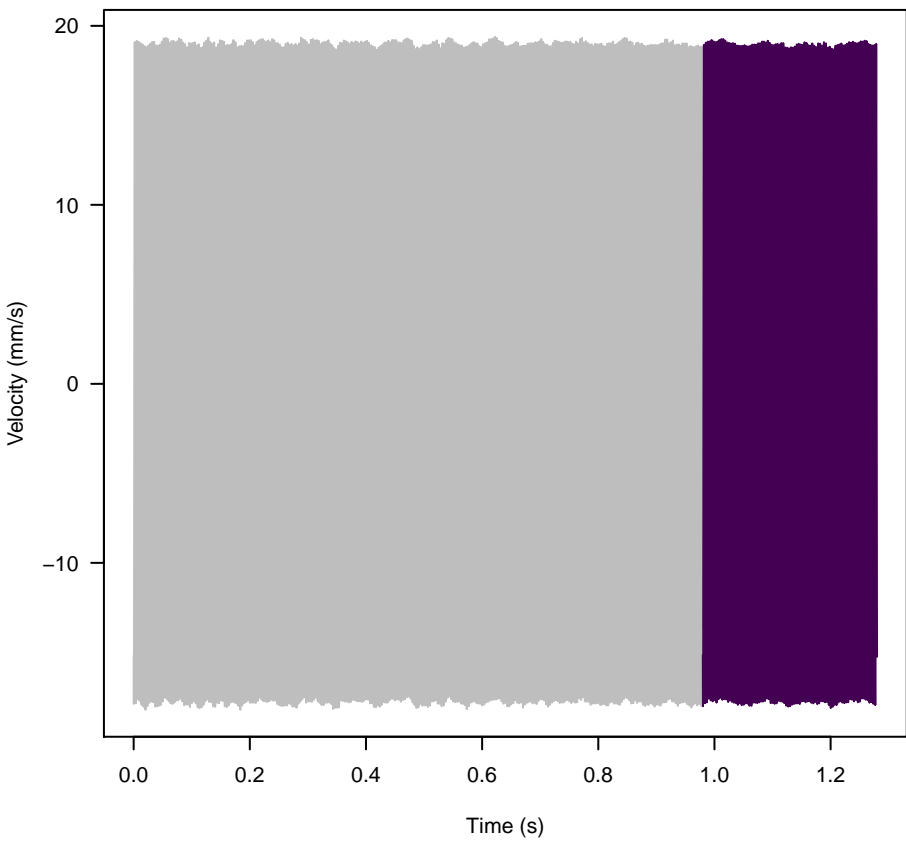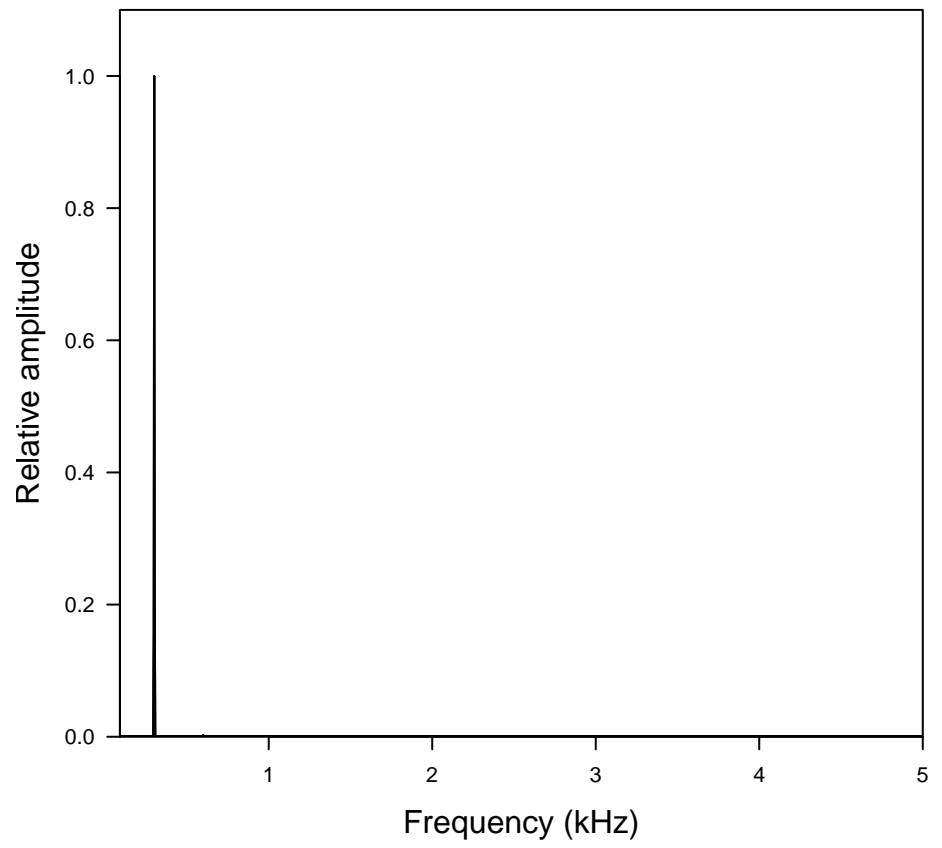

Vel. = 0.014 ; Str. = Receptacle ; Axis = z ; Fl. accession = 10-s-77-19

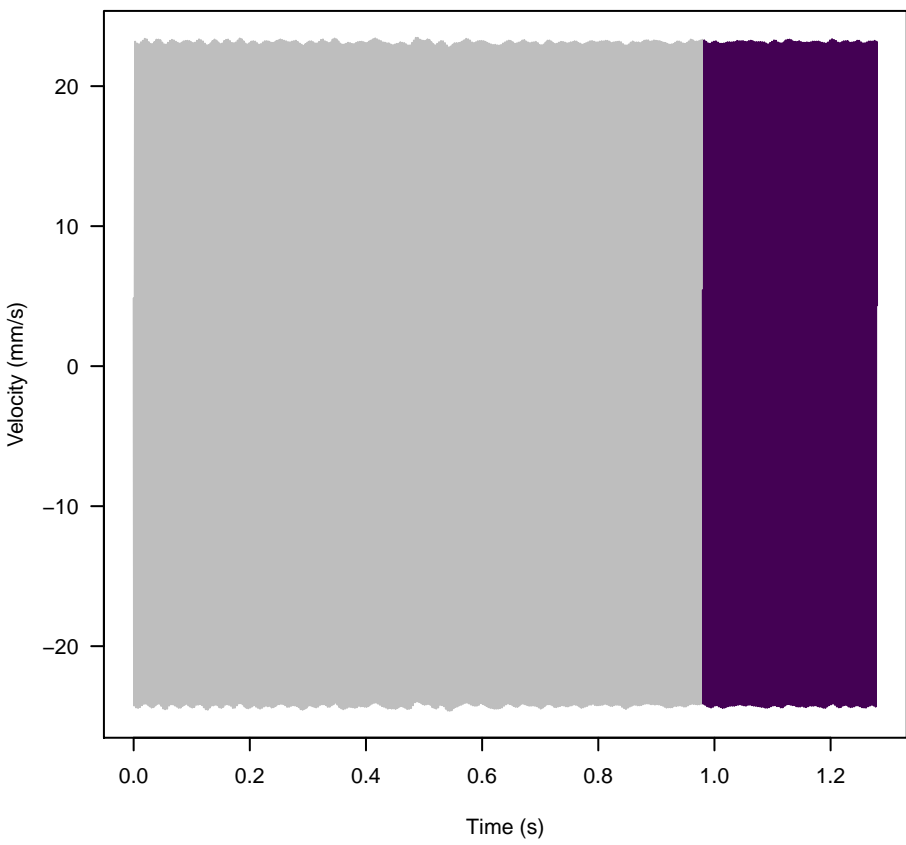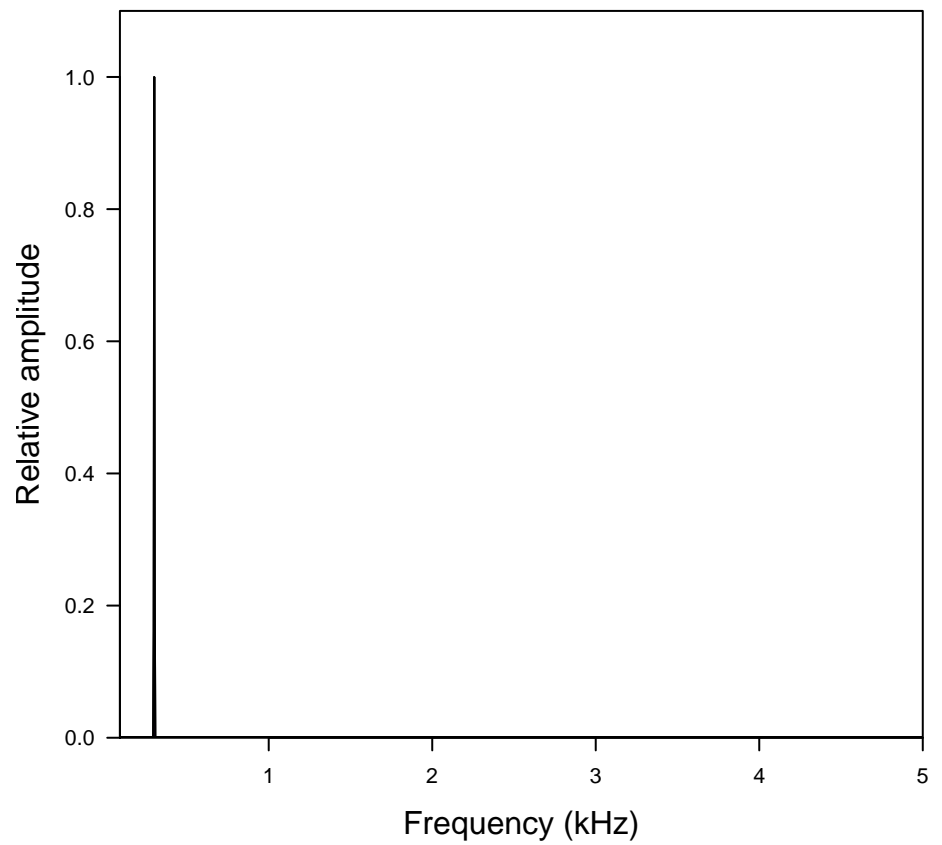

Vel. = 0.014 ; Str. = FA ; Axis = z ; Fl. accession = 10-s-77-19

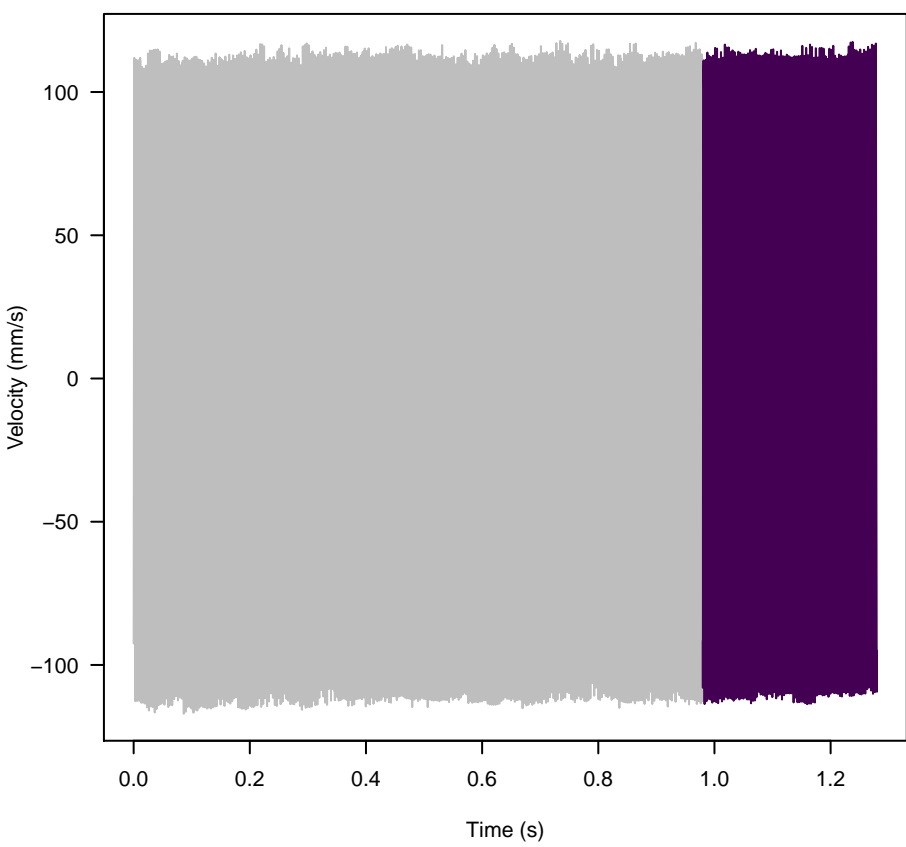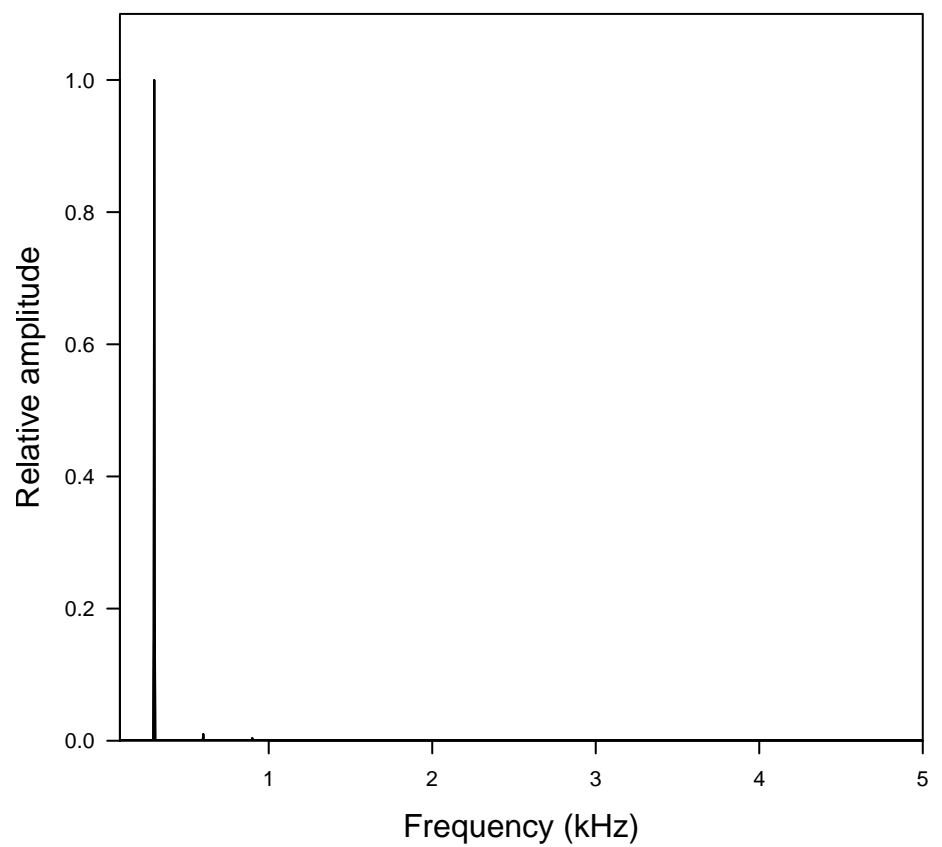

Vel. = 0.014 ; Str. = Receptacle ; Axis = z ; Fl. accession = 10-s-77-19

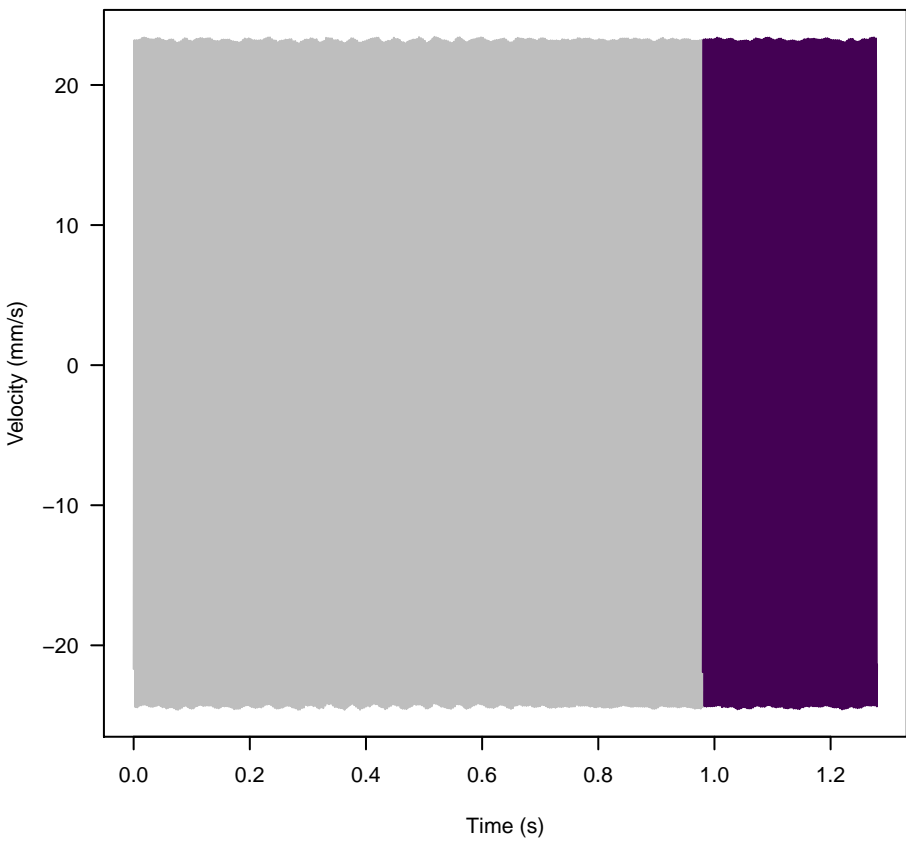

Vel. = 0.014 ; Str. = PA ; Axis = z ; Fl. accession = 10-s-77-19

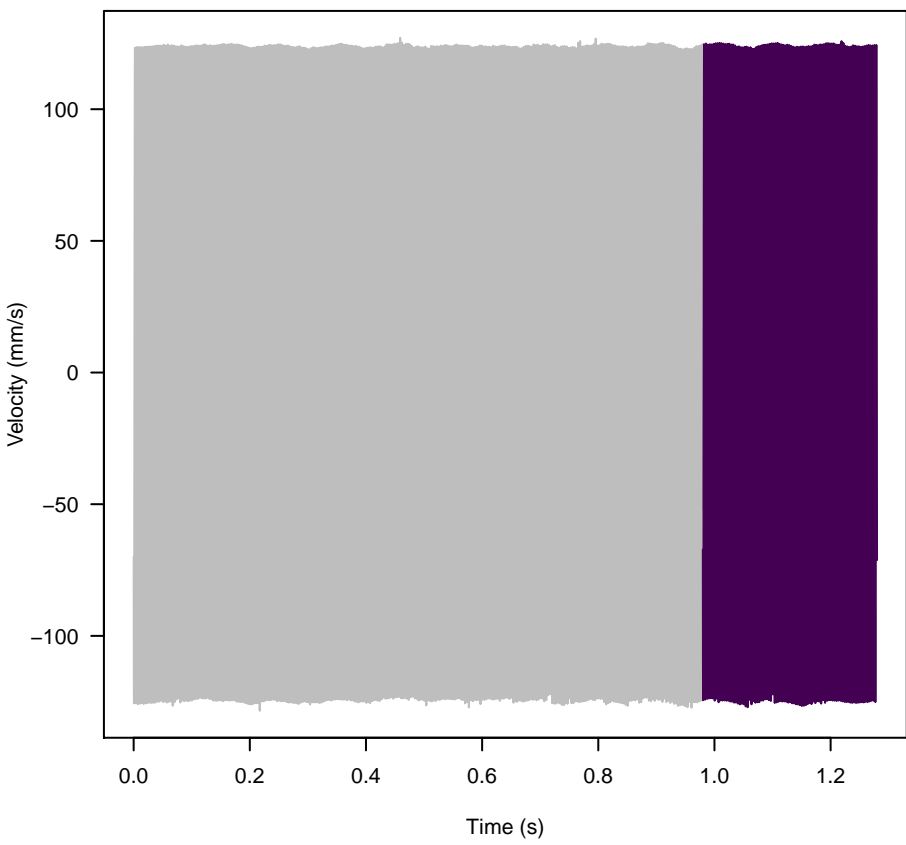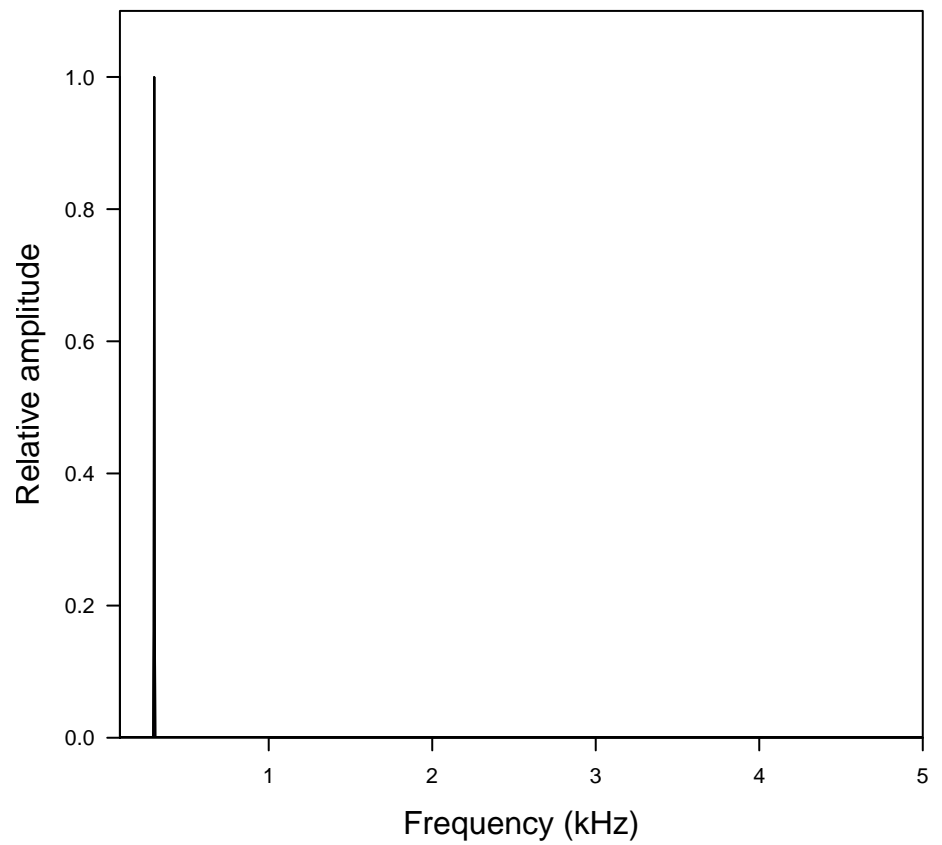

Vel. = 0.014 ; Str. = Receptacle ; Axis = z ; Fl. accession = 10-s-77-19

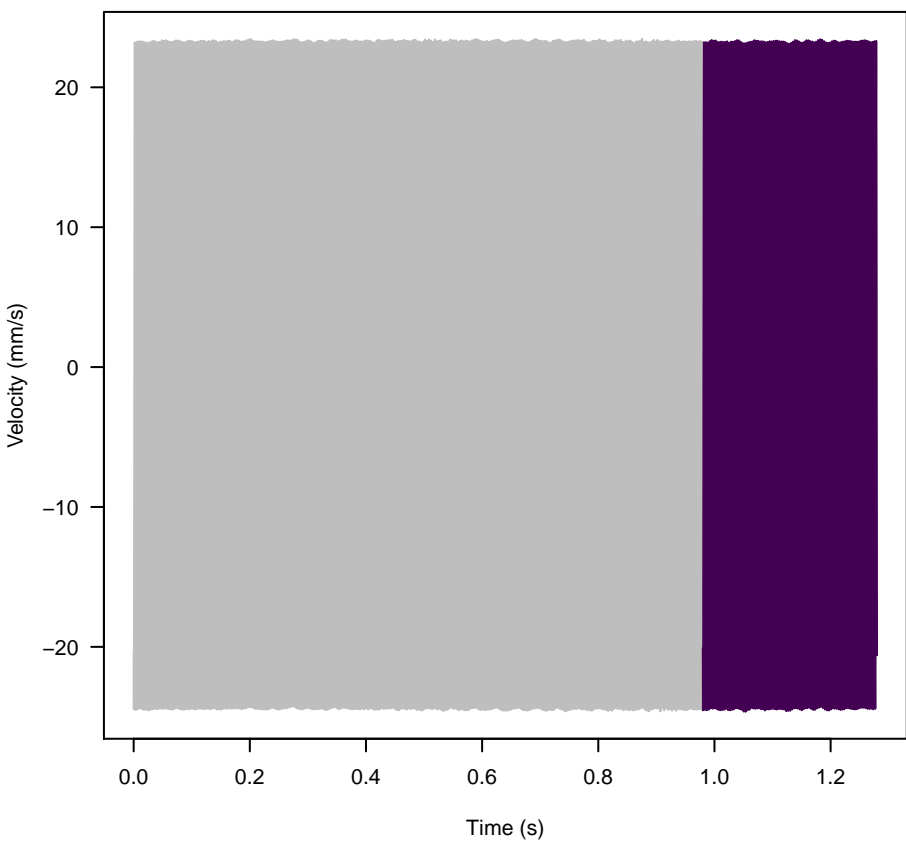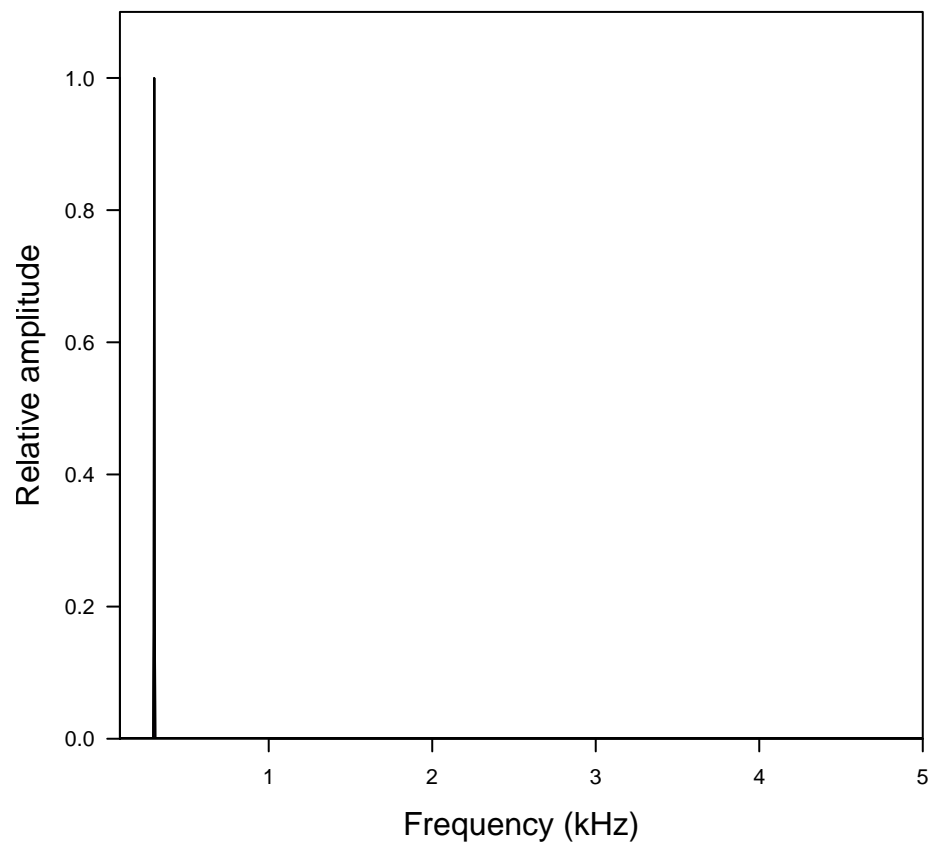



Vel. = 0.014 ; Str. = Corolla ; Axis = y ; Fl. accession = 10-s-77-19

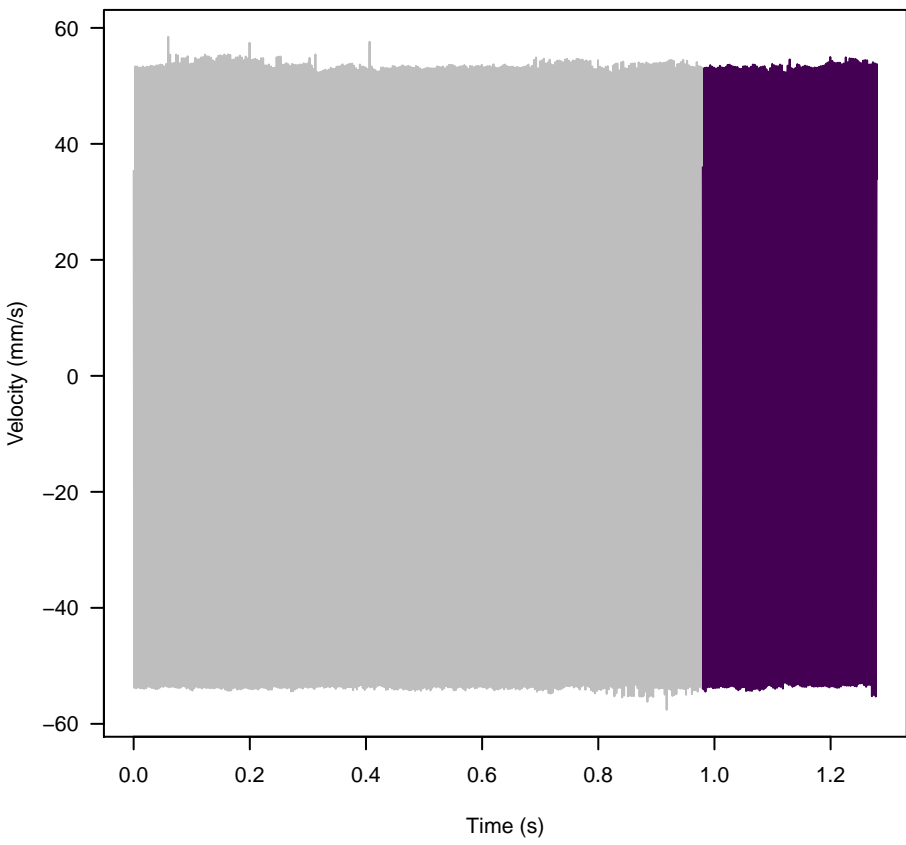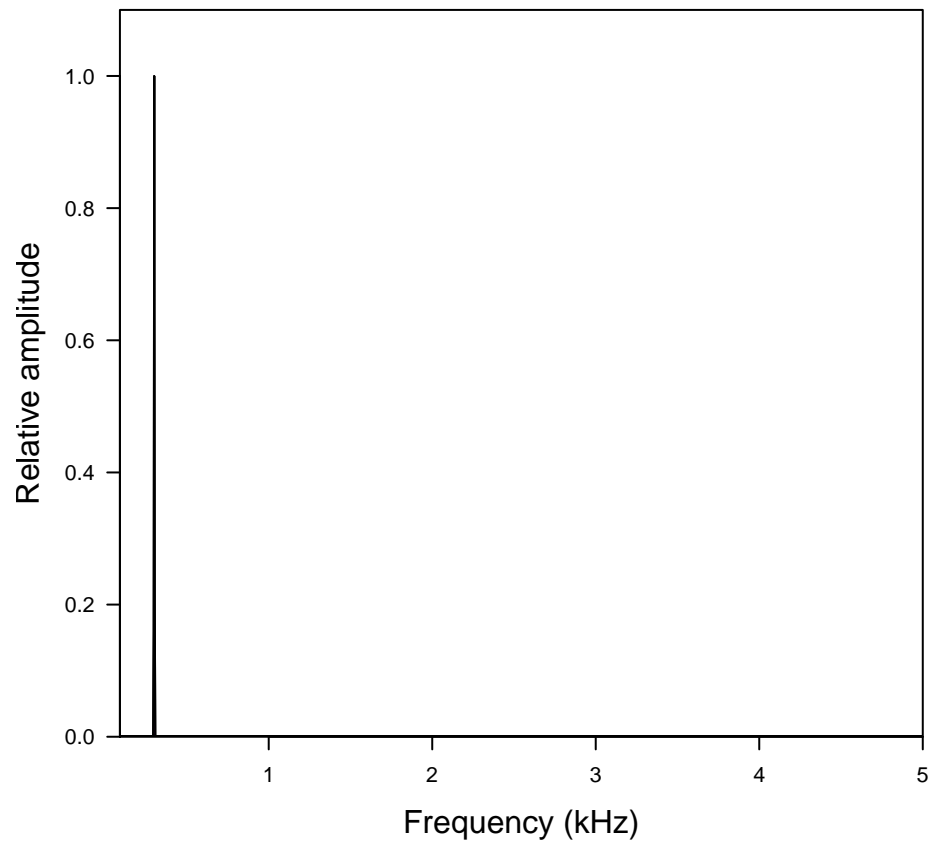

Vel. = 0.014 ; Str. = Receptacle ; Axis = y ; Fl. accession = 10-s-77-19

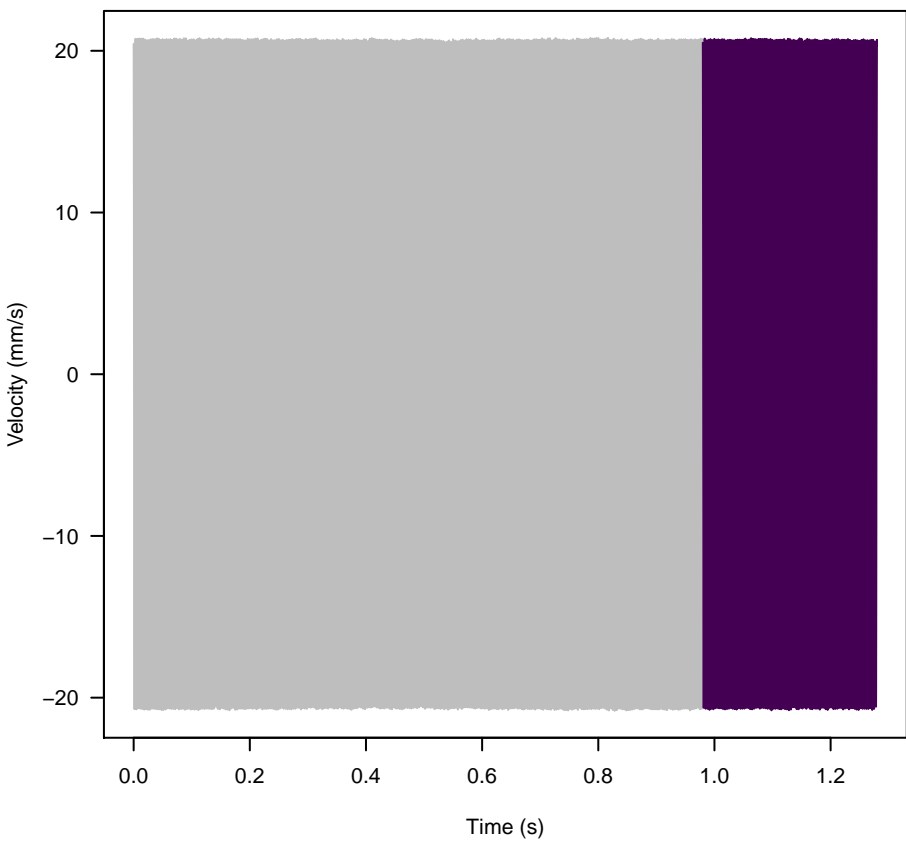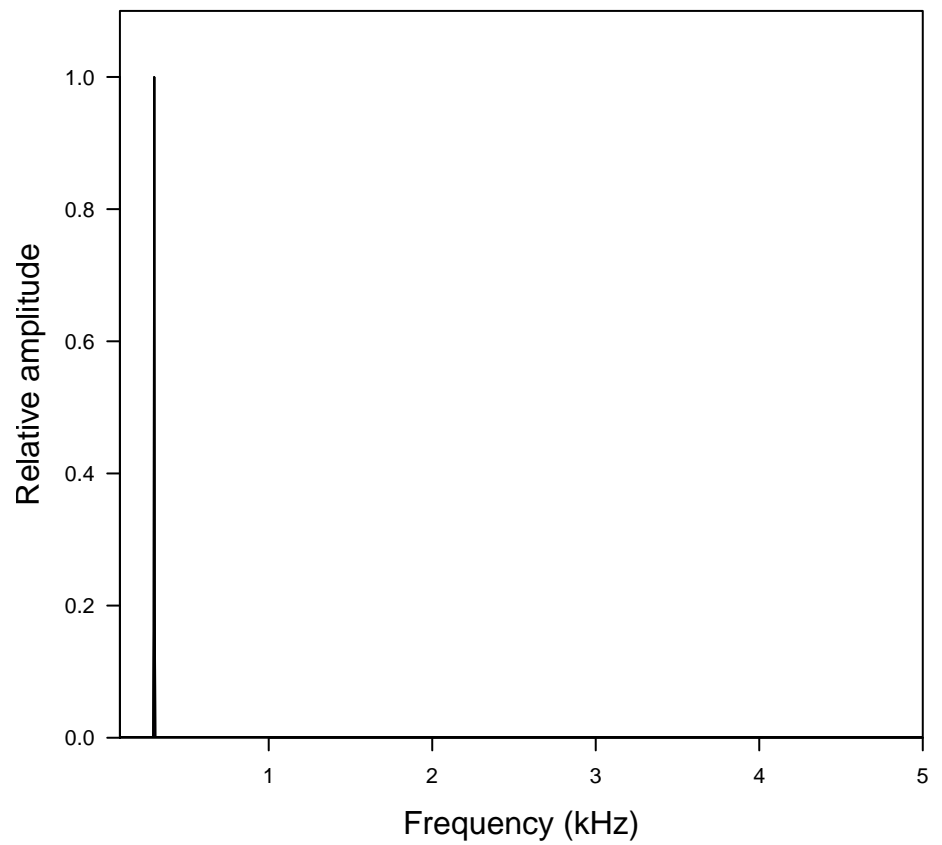

Vel. = 0.014 ; Str. = FA ; Axis = y ; Fl. accession = 10-s-77-19

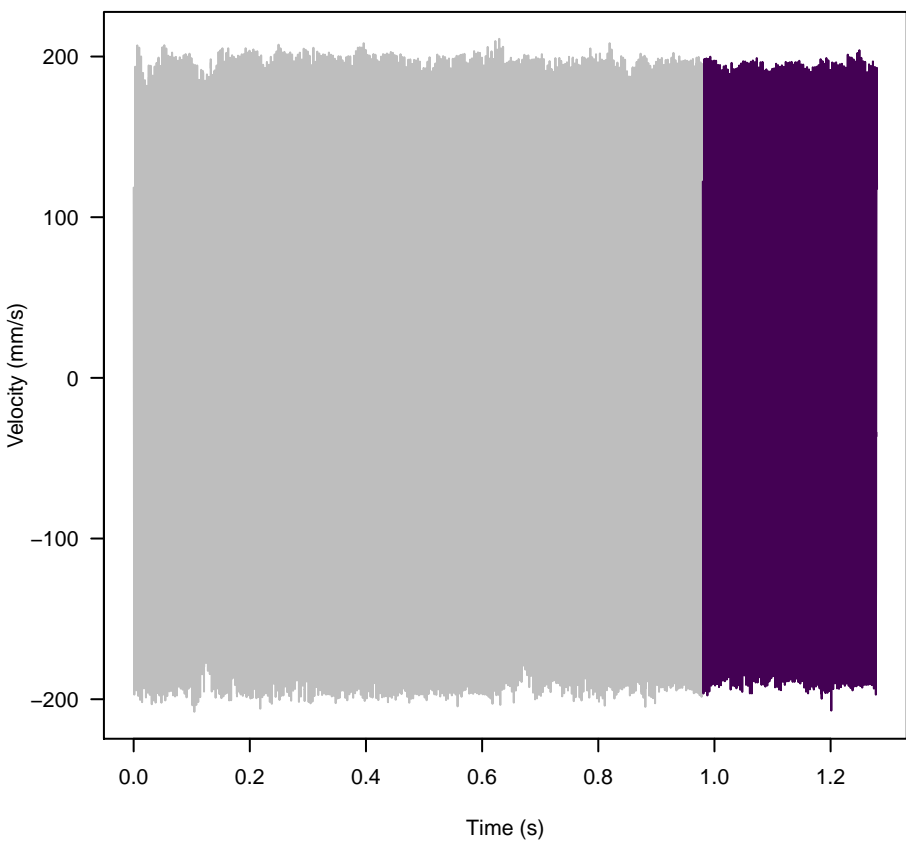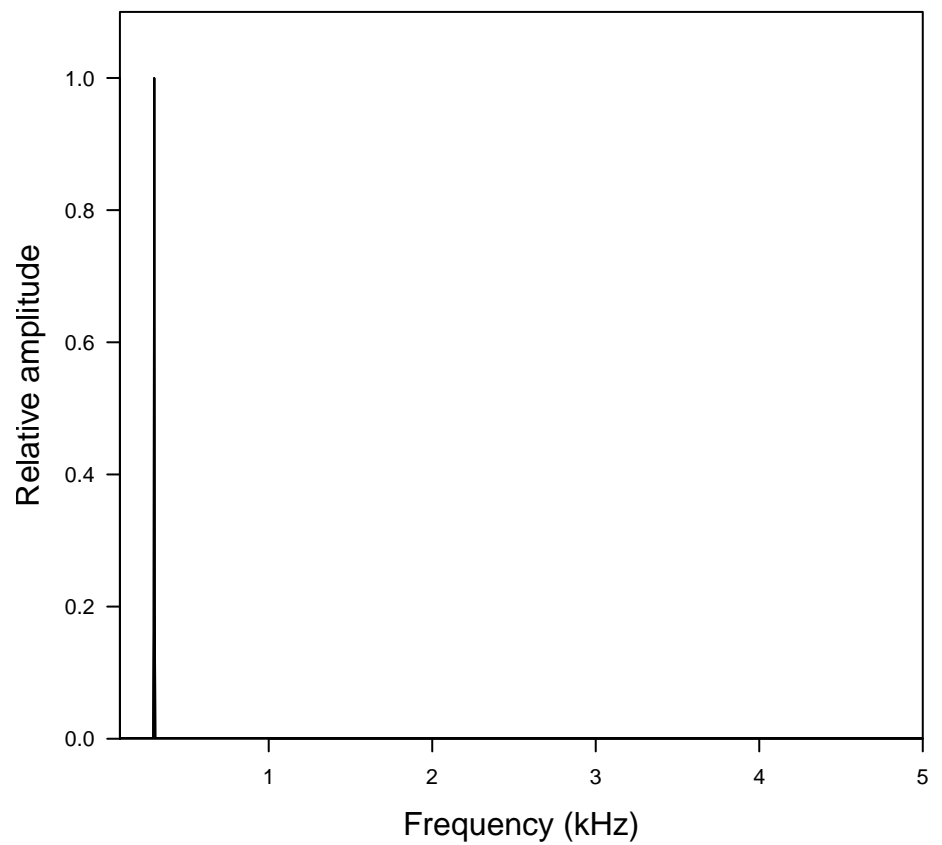

Vel. = 0.014 ; Str. = Receptacle ; Axis = y ; Fl. accession = 10-s-77-19

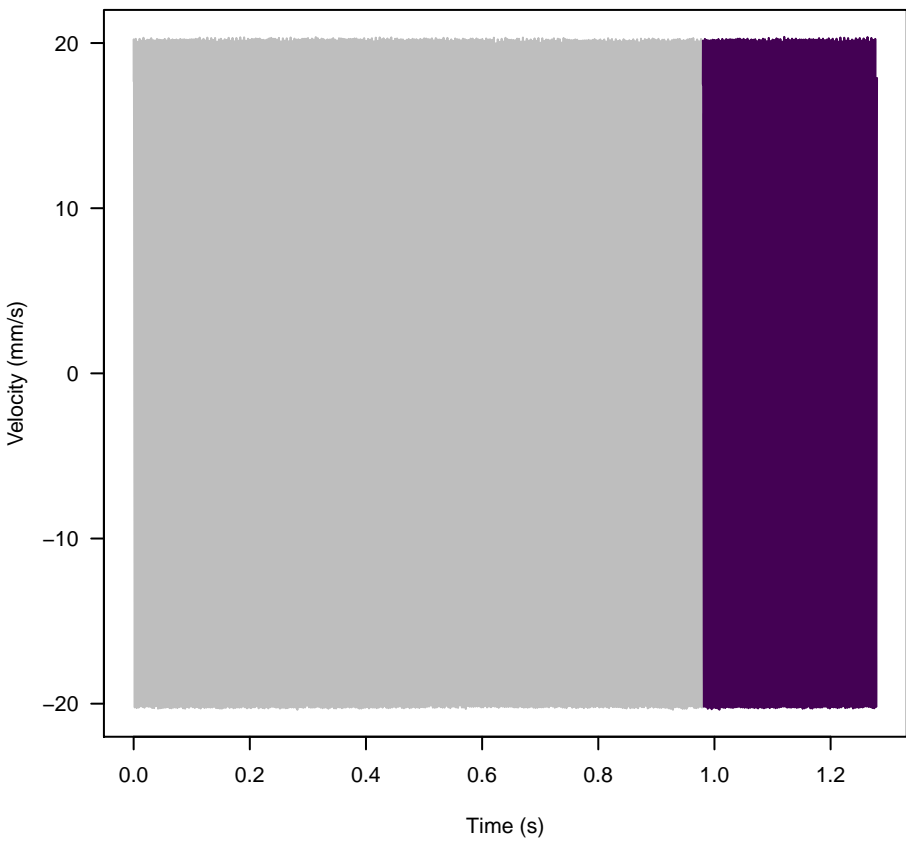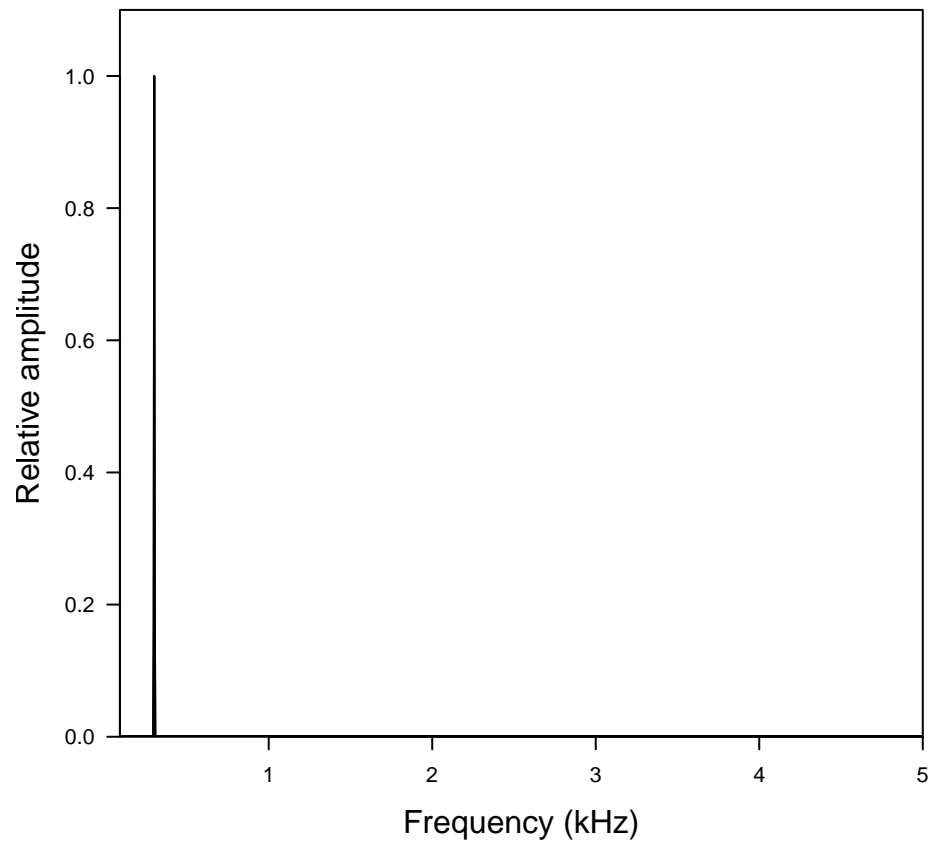

Vel. = 0.014 ; Str. = PA ; Axis = y ; Fl. accession = 10-s-77-19

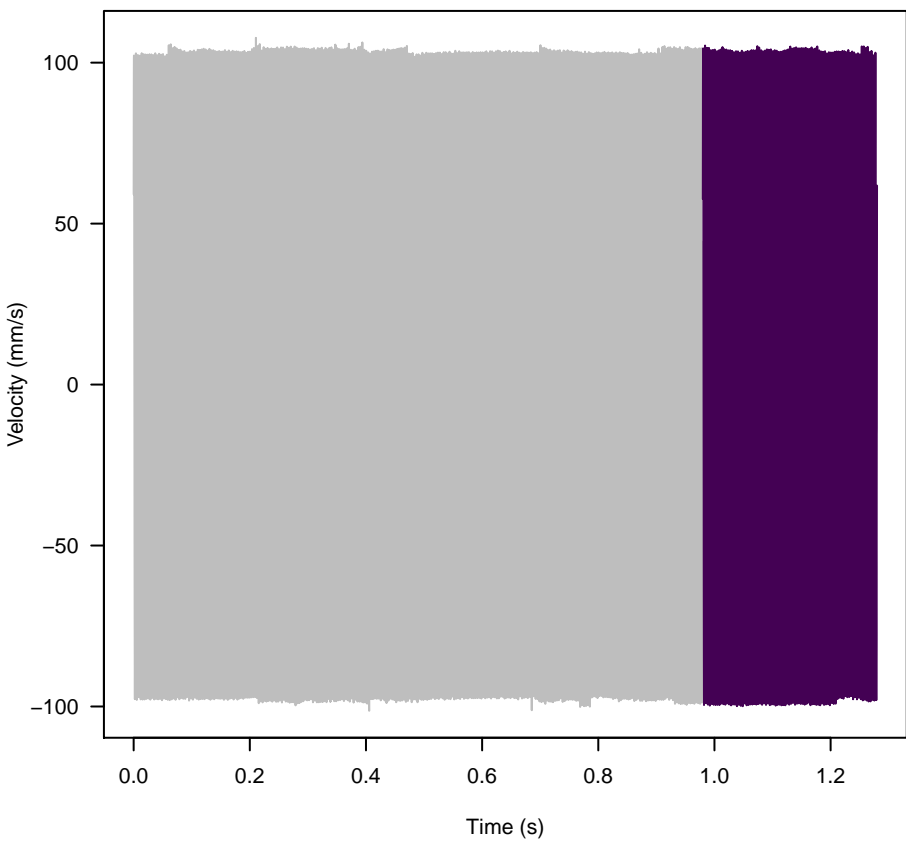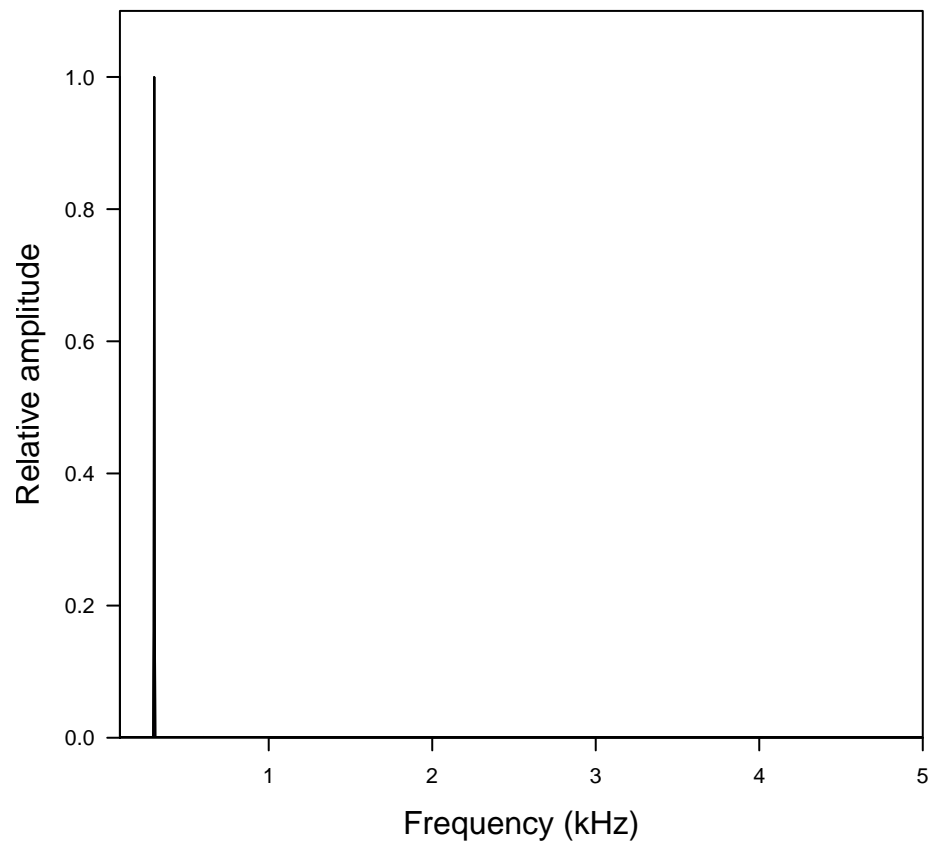

Vel. = 0.014 ; Str. = Receptacle ; Axis = y ; Fl. accession = 10-s-77-19

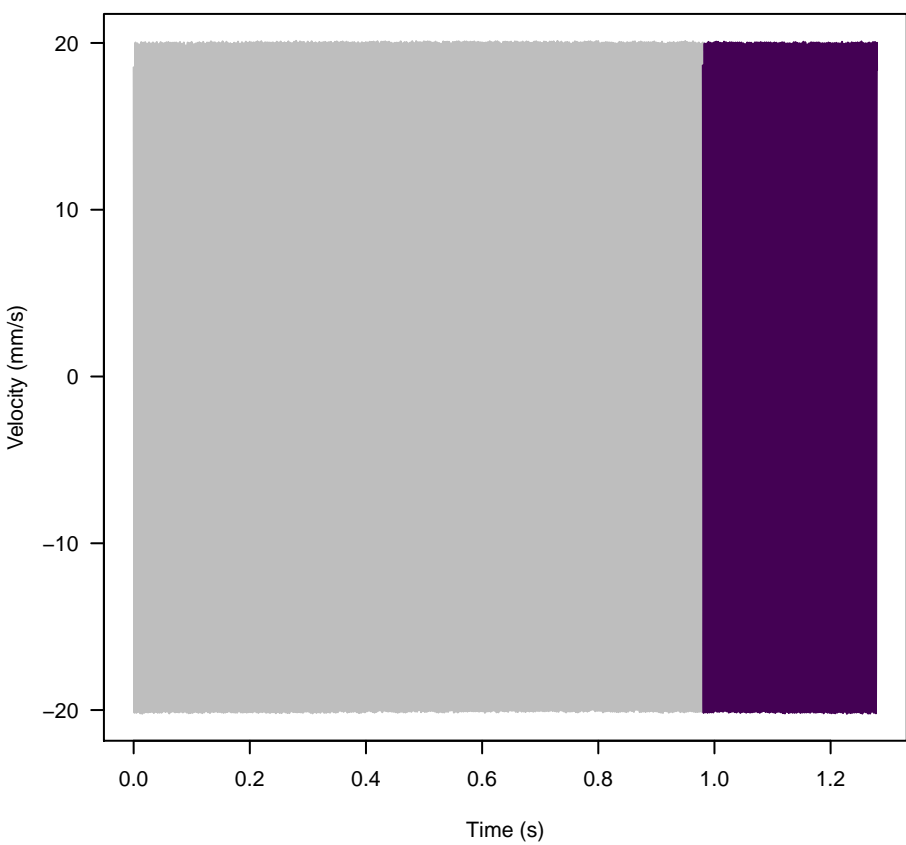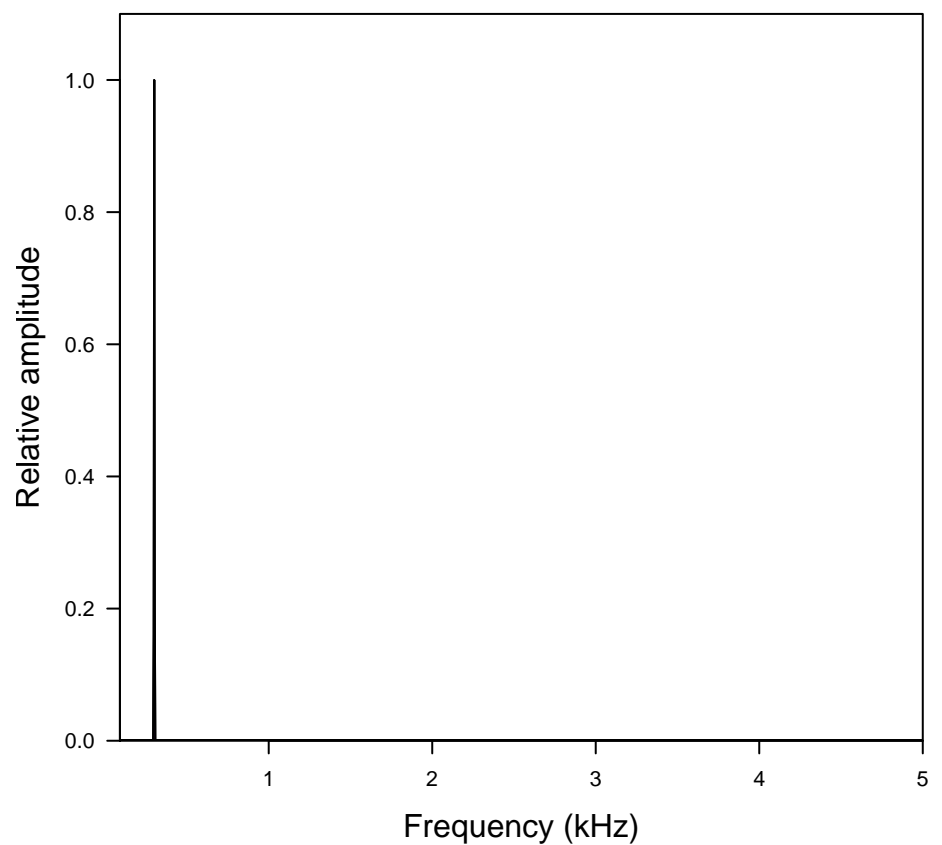

Vel. = 0.028 ; Str. = PA ; Axis = y ; Fl. accession = 10-s-77-19

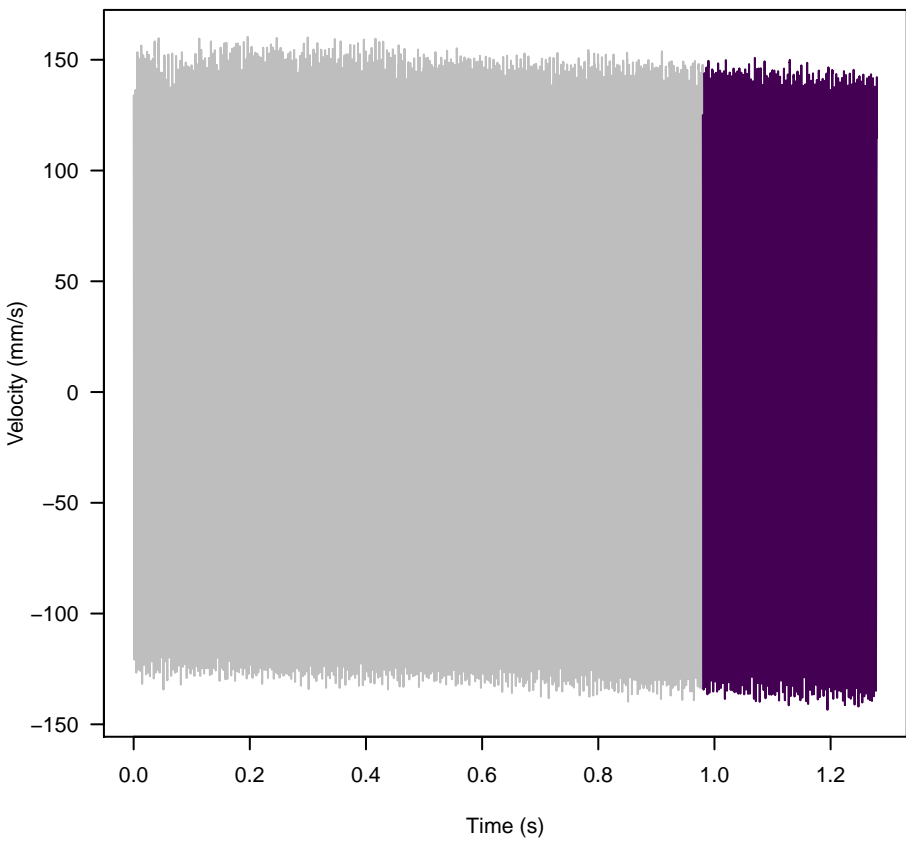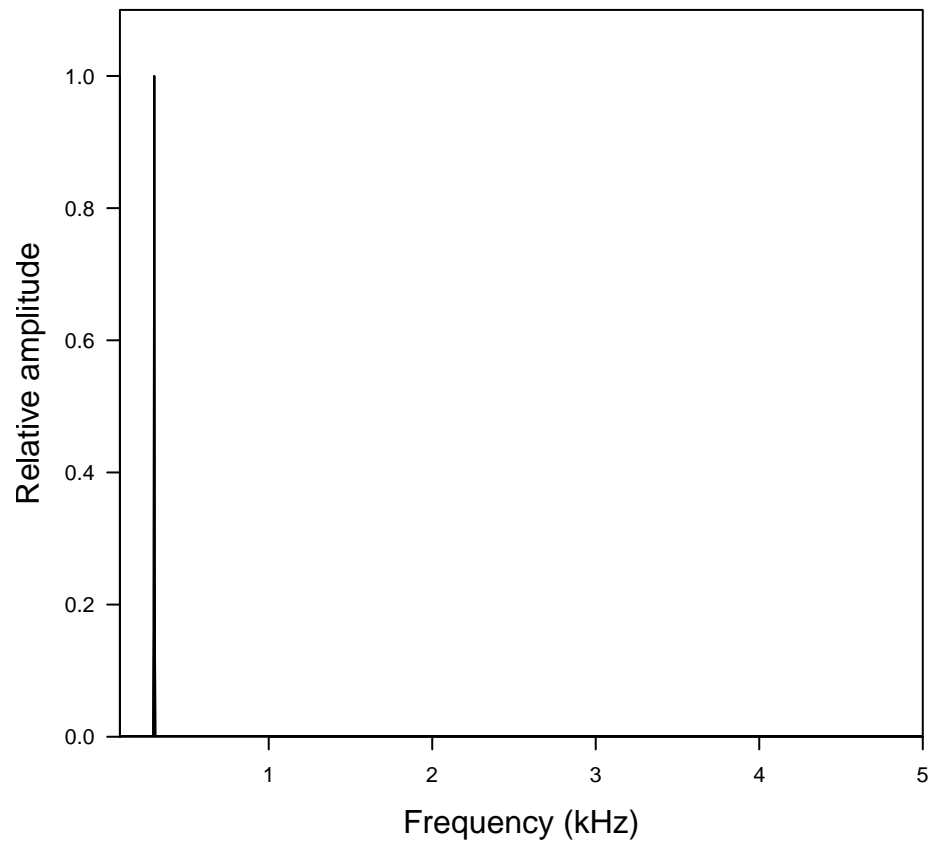

Vel. = 0.028 ; Str. = Receptacle ; Axis = y ; Fl. accession = 10-s-77-19

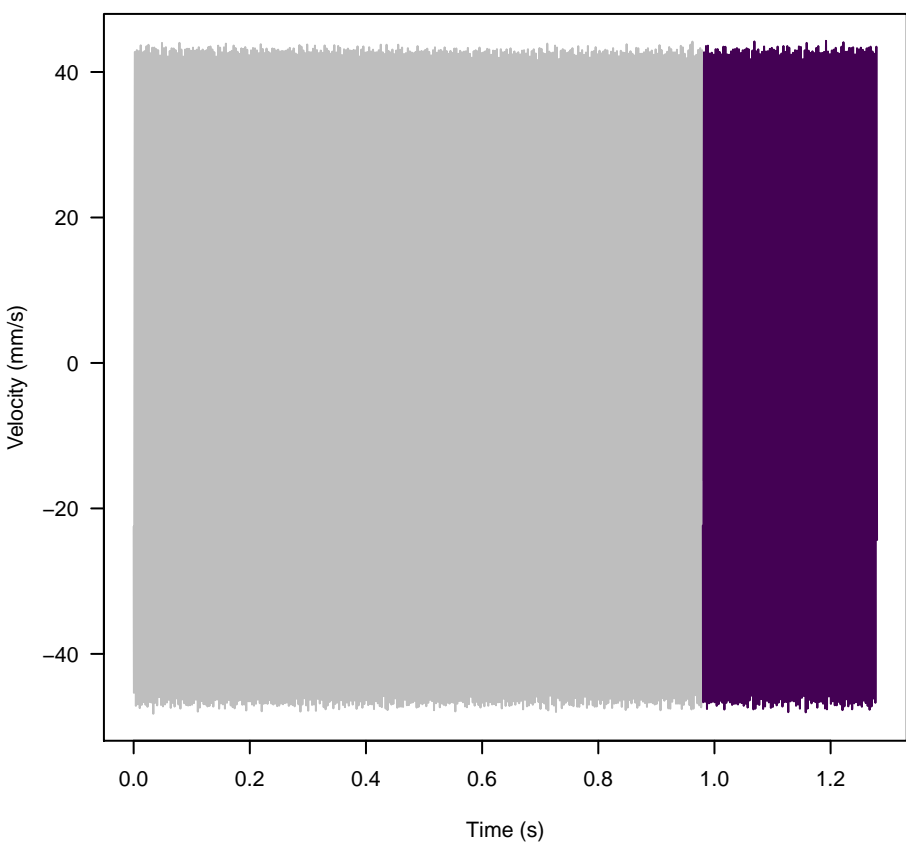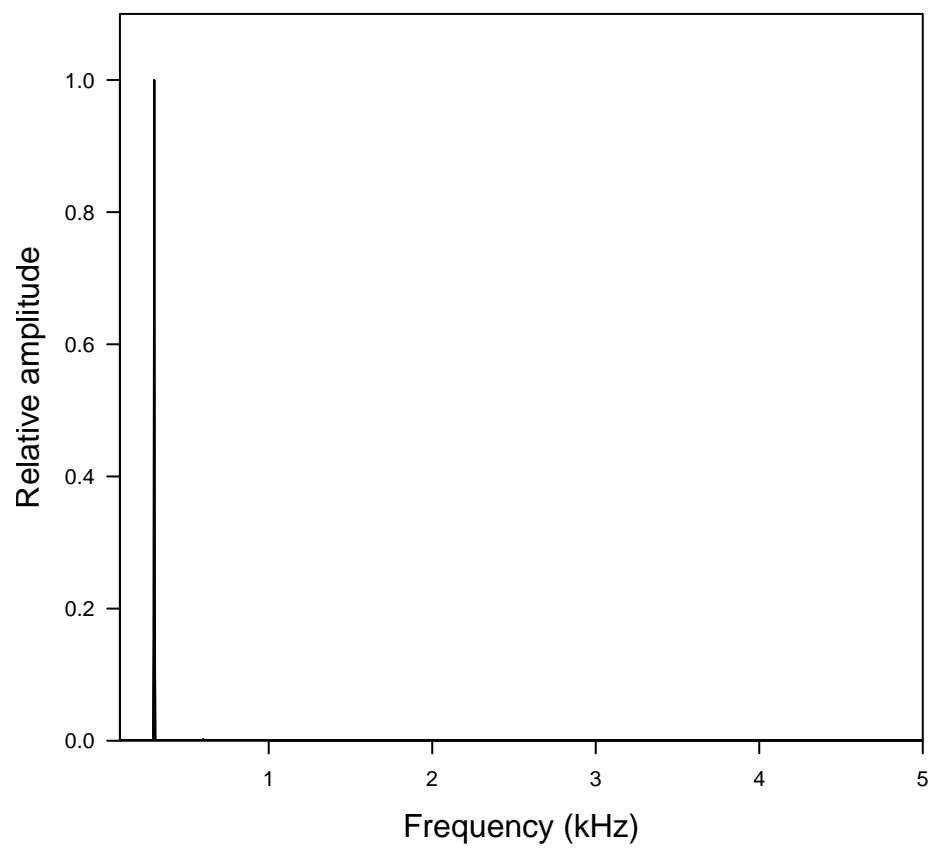

Vel. = 0.028 ; Str. = FA ; Axis = y ; Fl. accession = 10-s-77-19

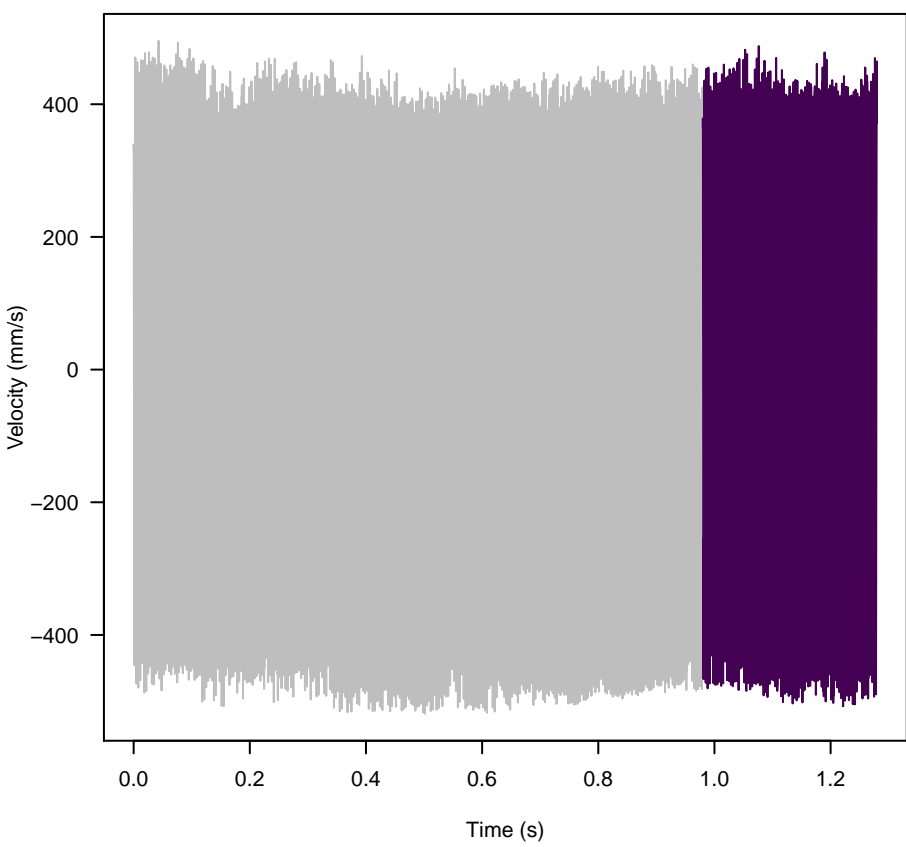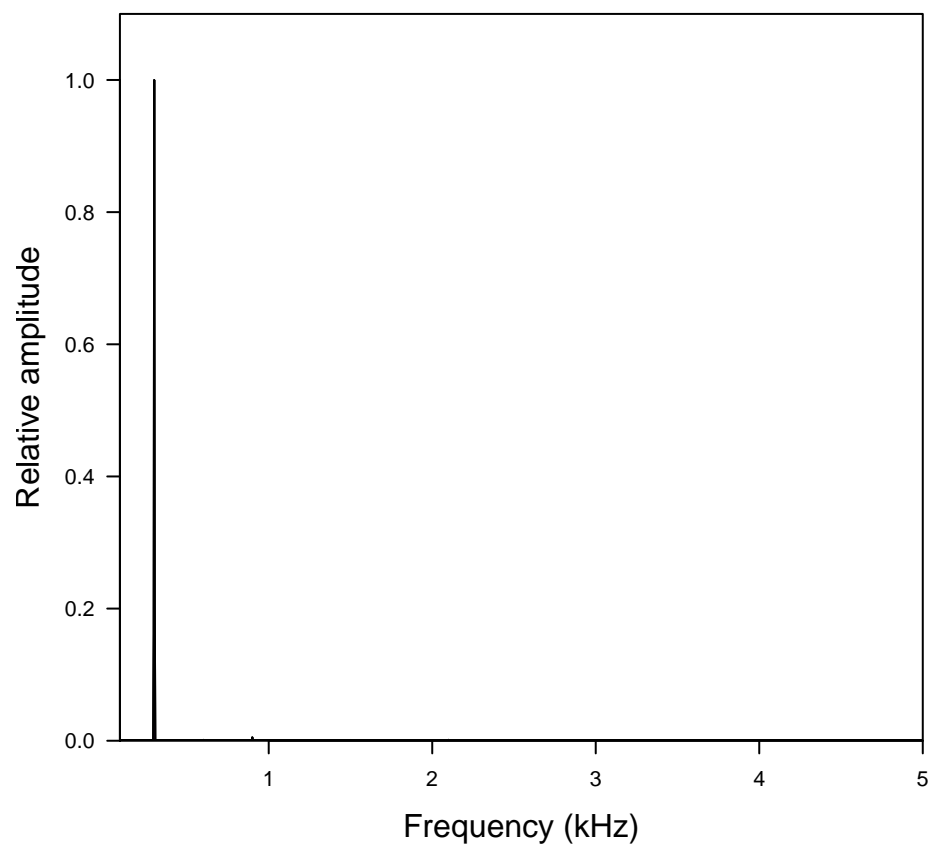

Vel. = 0.028 ; Str. = Receptacle ; Axis = y ; Fl. accession = 10-s-77-19

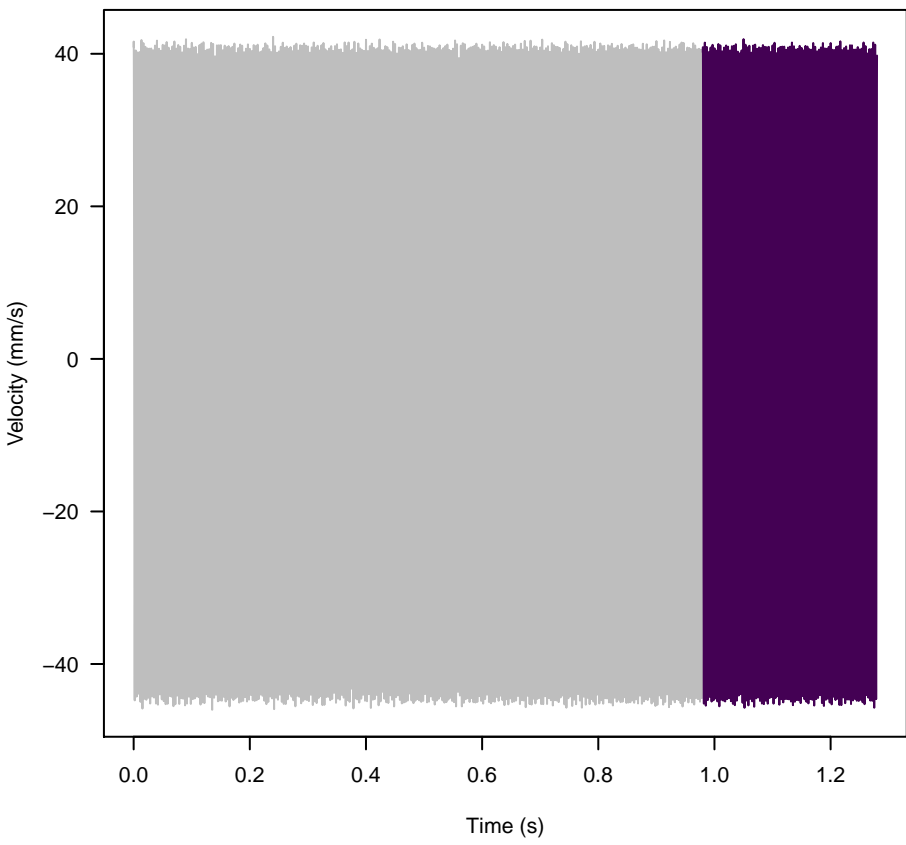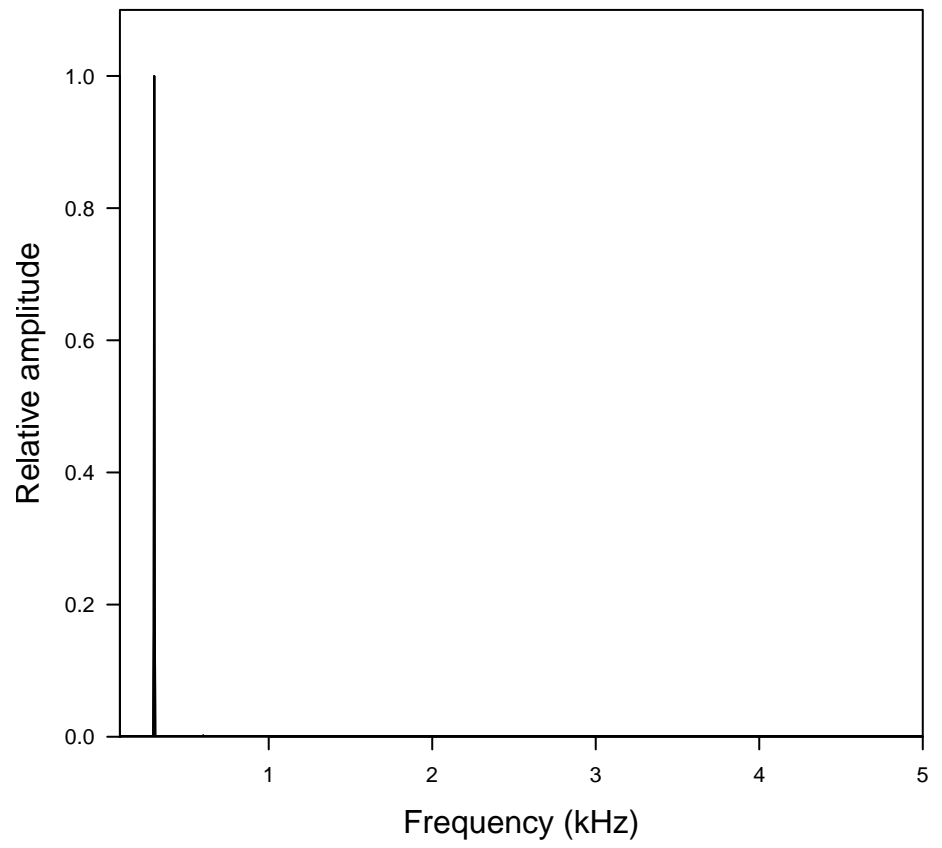

Vel. = 0.028 ; Str. = Corolla ; Axis = y ; Fl. accession = 10-s-77-19

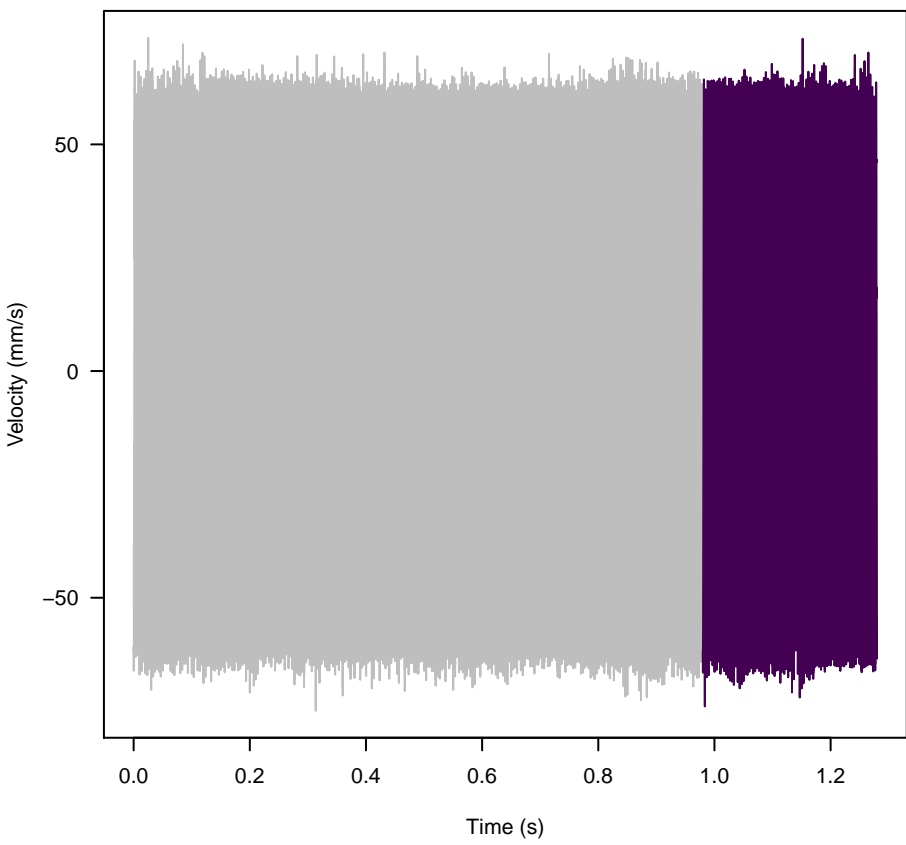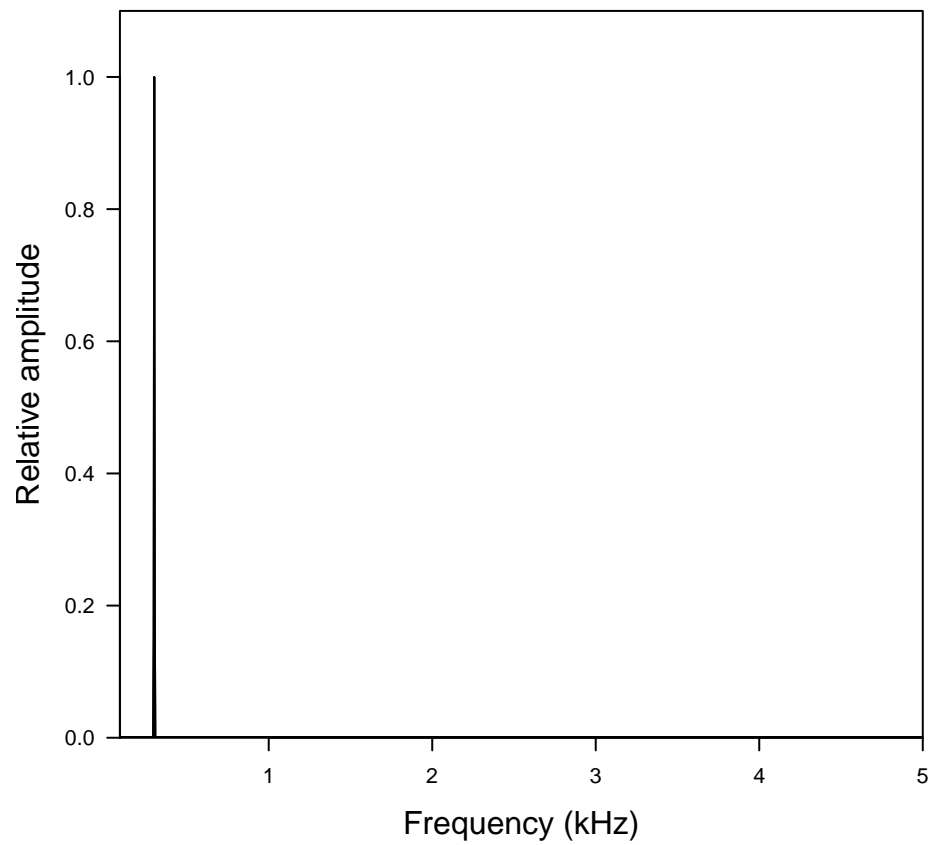

Vel. = 0.028 ; Str. = Receptacle ; Axis = y ; Fl. accession = 10-s-77-19

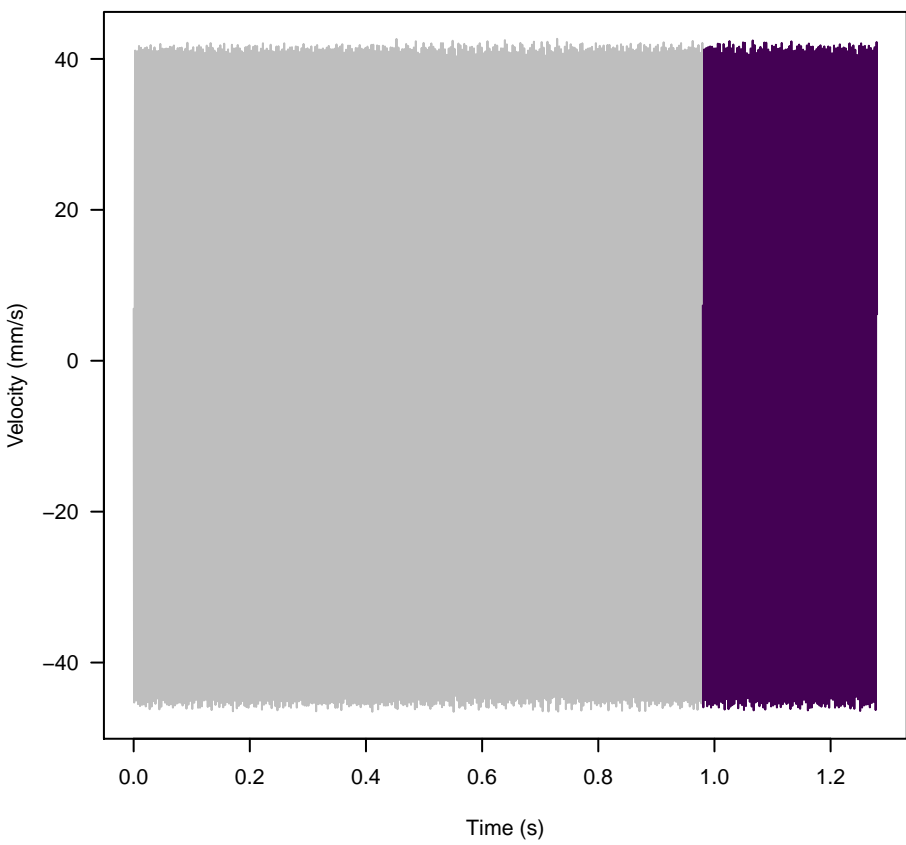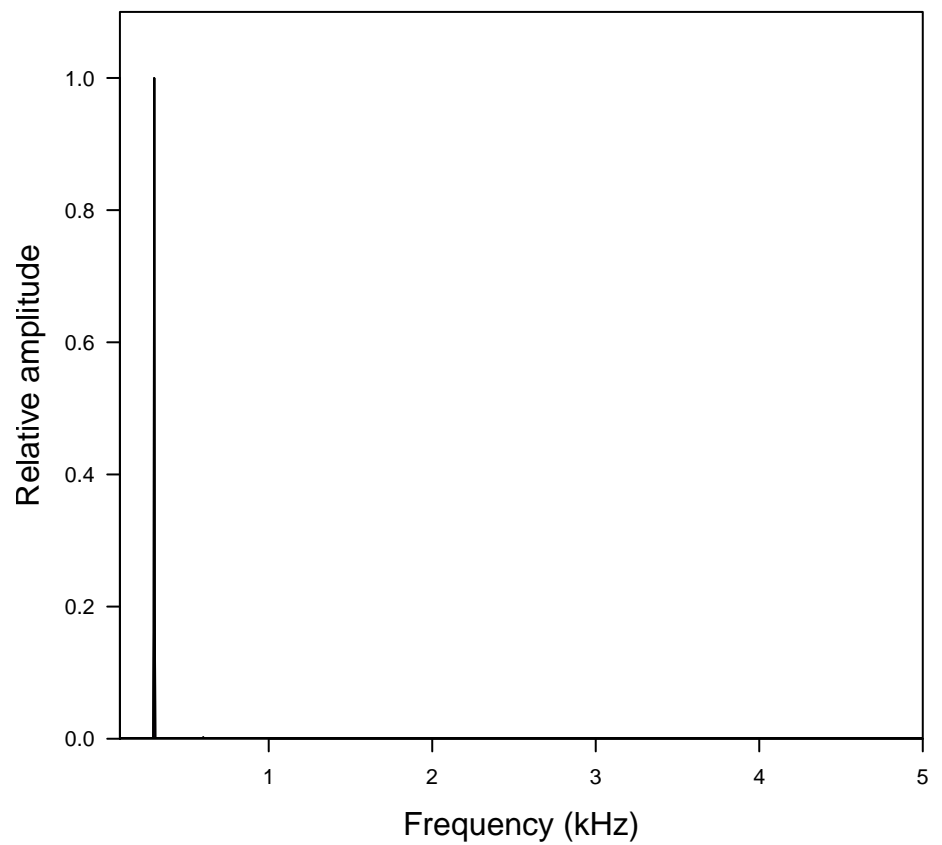

Vel. = 0.057 ; Str. = Corolla ; Axis = y ; Fl. accession = 10-s-77-19

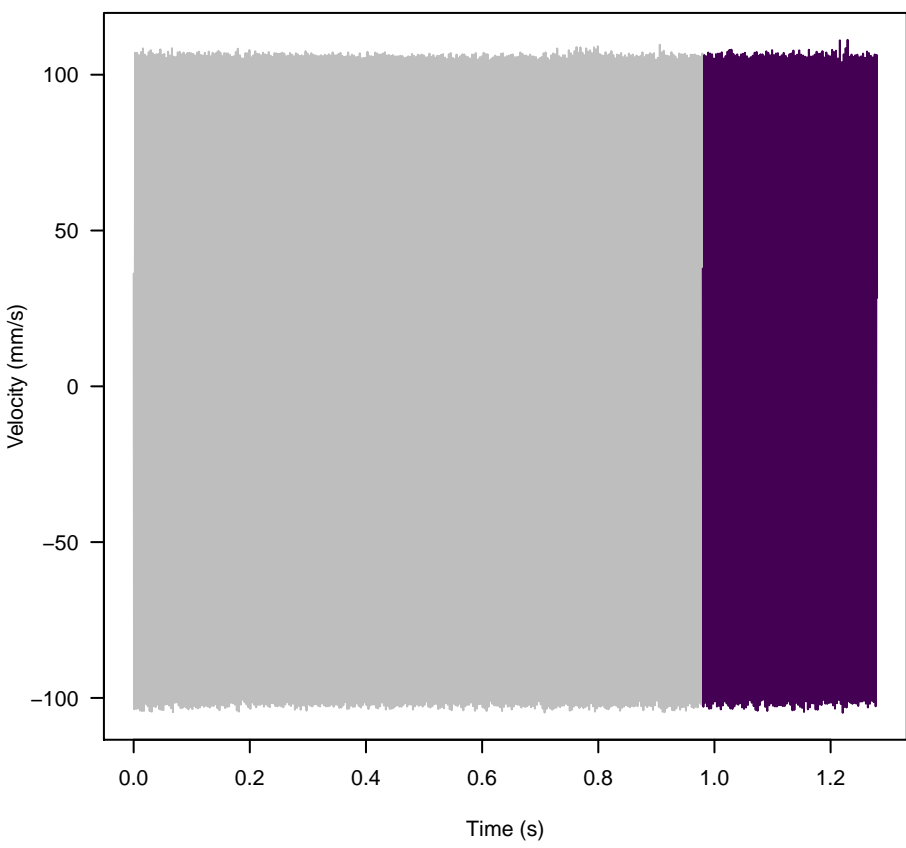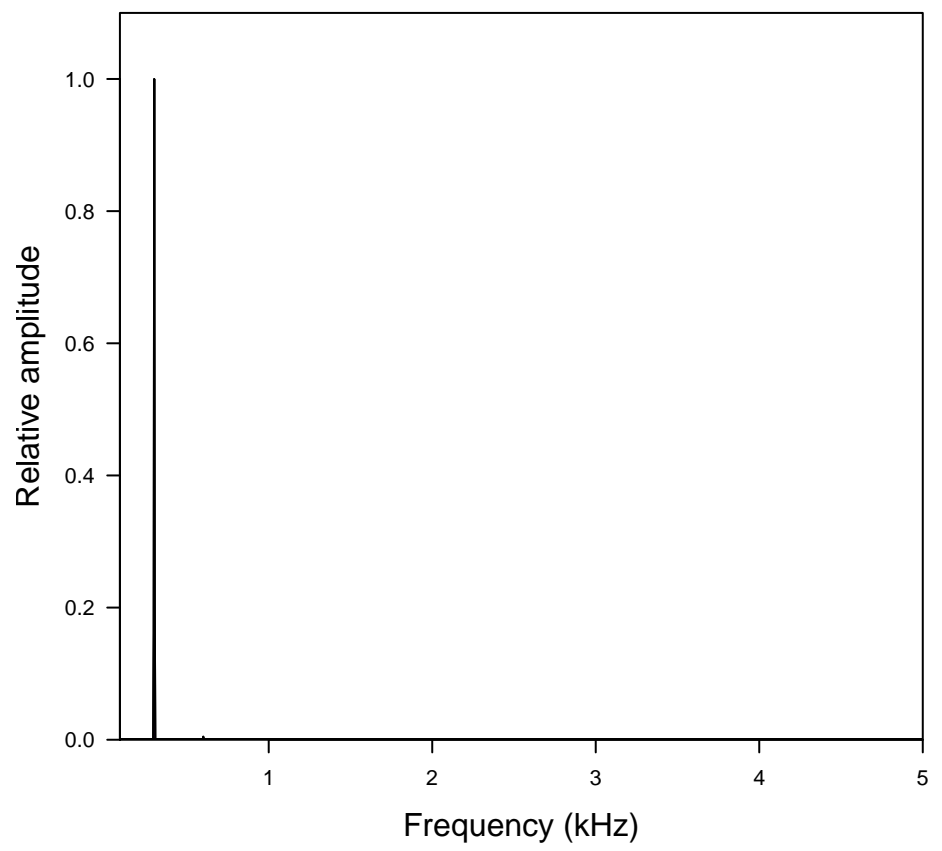

Vel. = 0.057 ; Str. = Receptacle ; Axis = y ; Fl. accession = 10-s-77-19

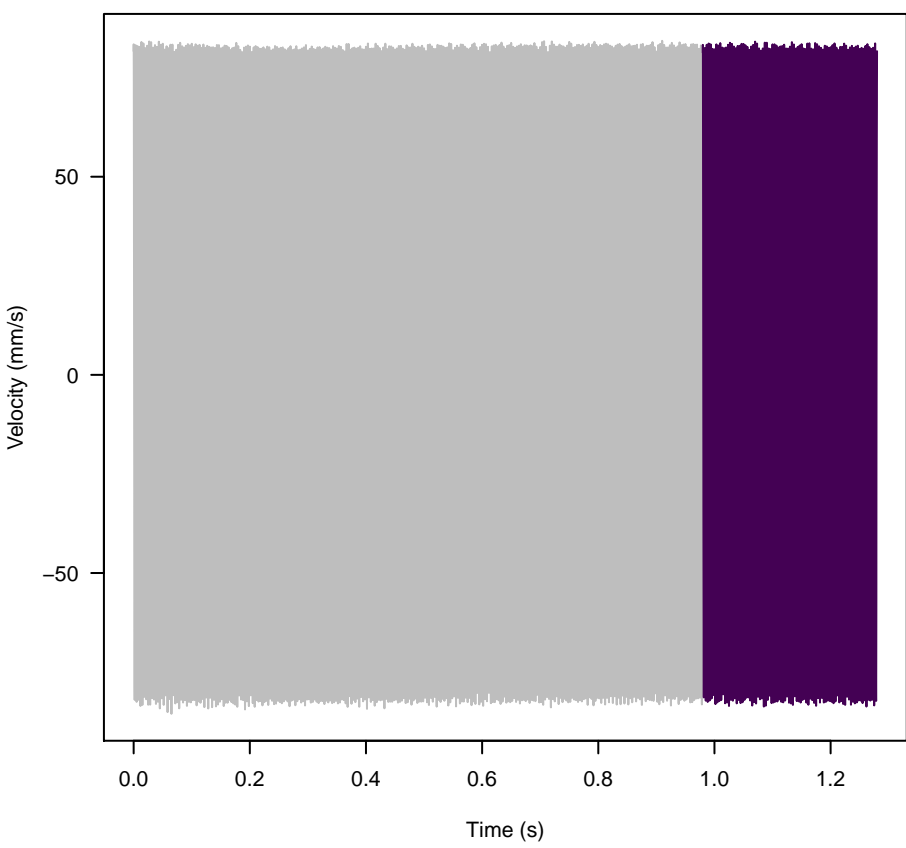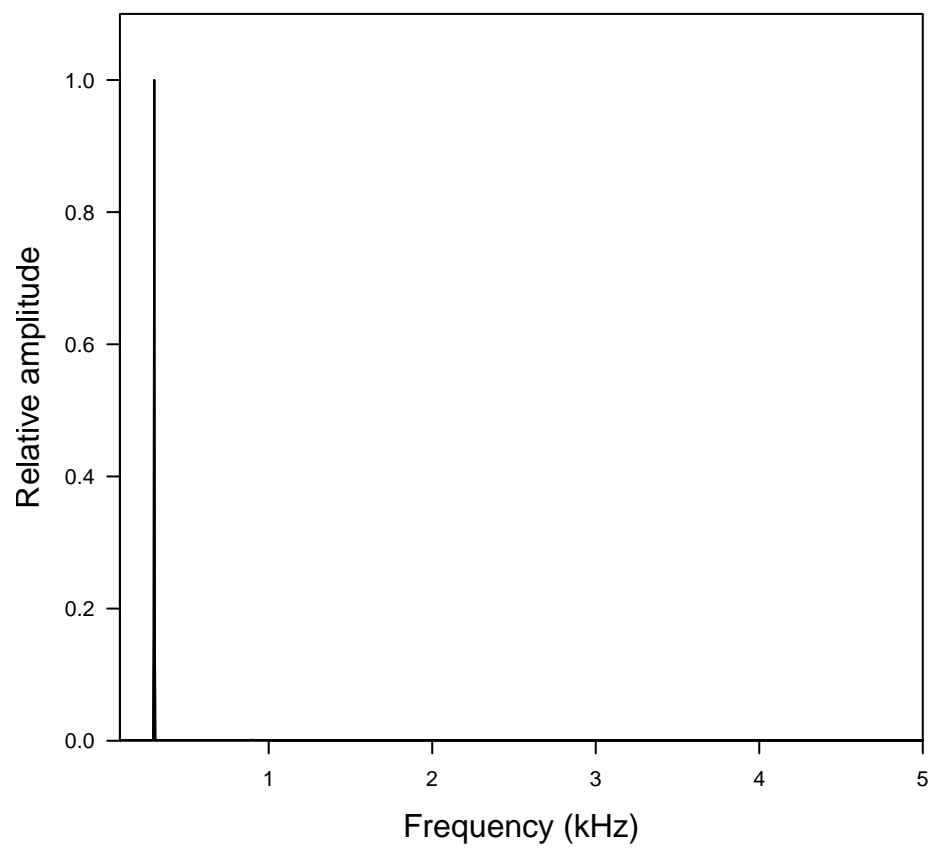

Vel. = 0.057 ; Str. = Receptacle ; Axis = y ; Fl. accession = 10-s-77-19

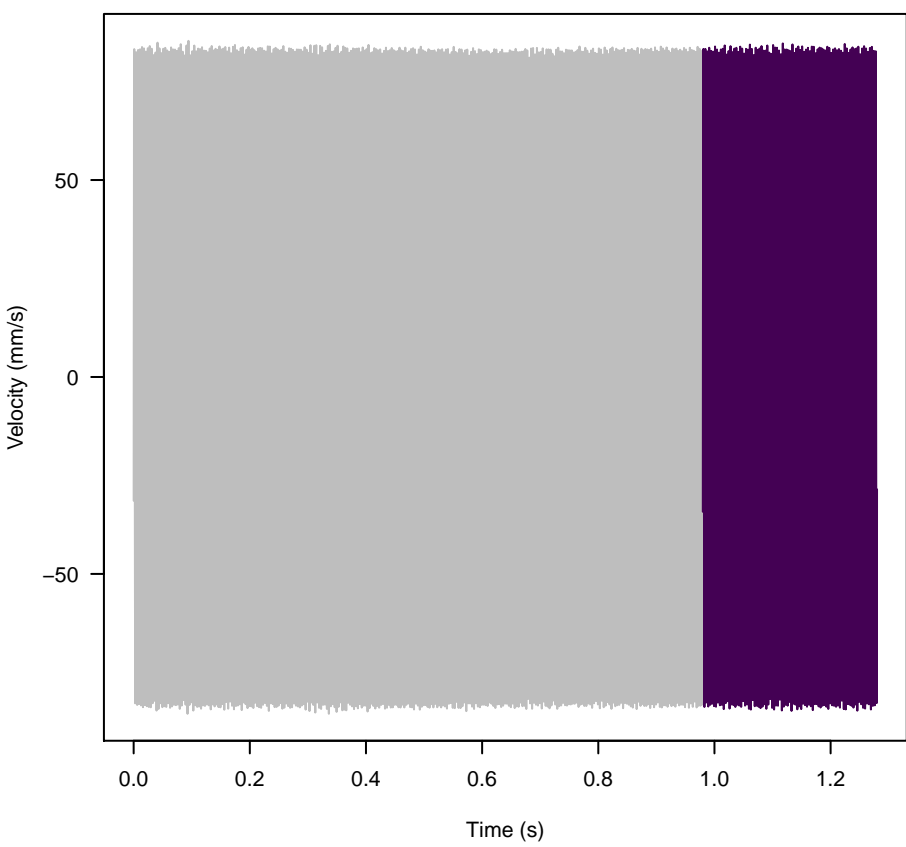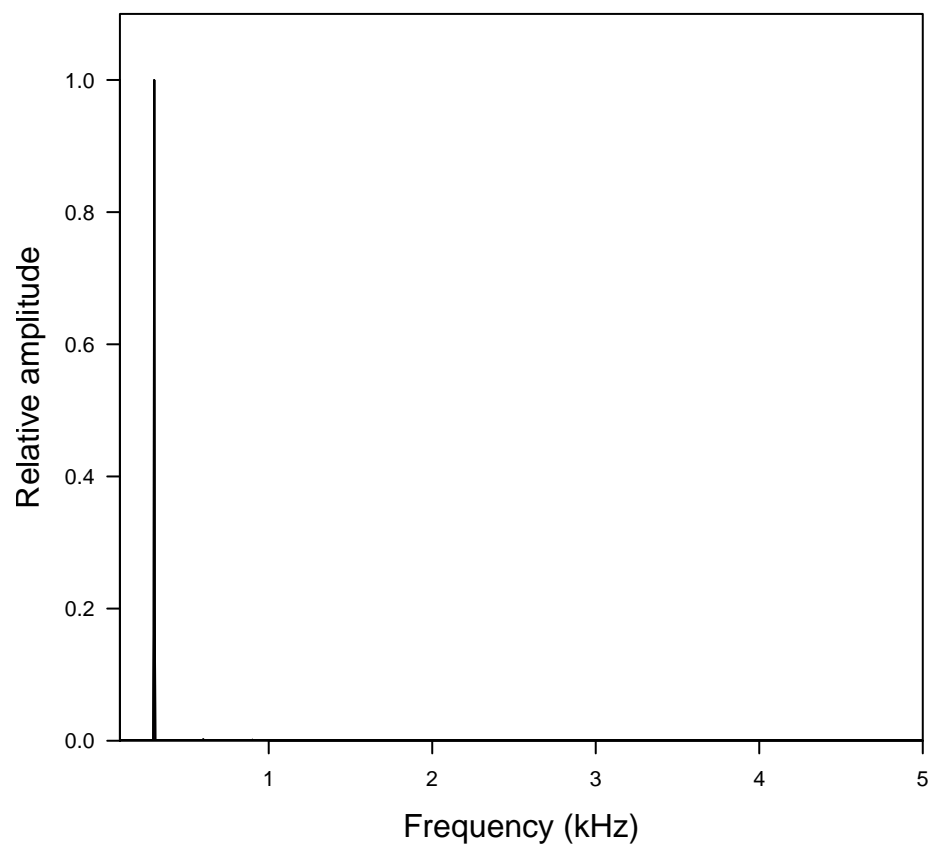

Vel. = 0.057 ; Str. = PA ; Axis = y ; Fl. accession = 10-s-77-19

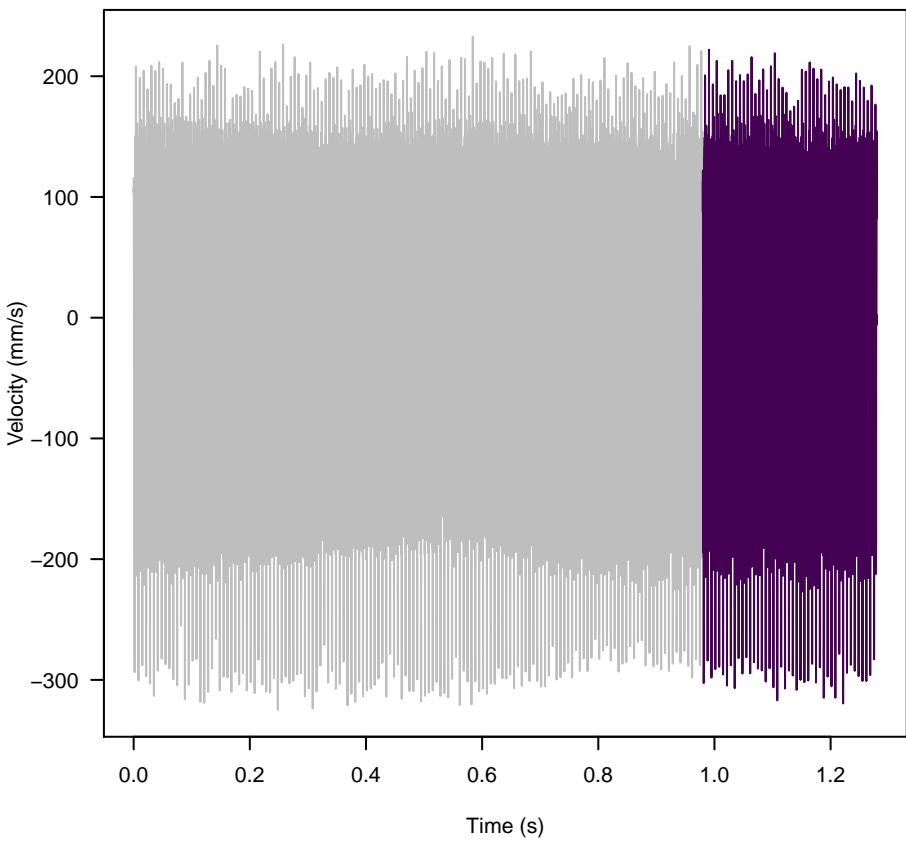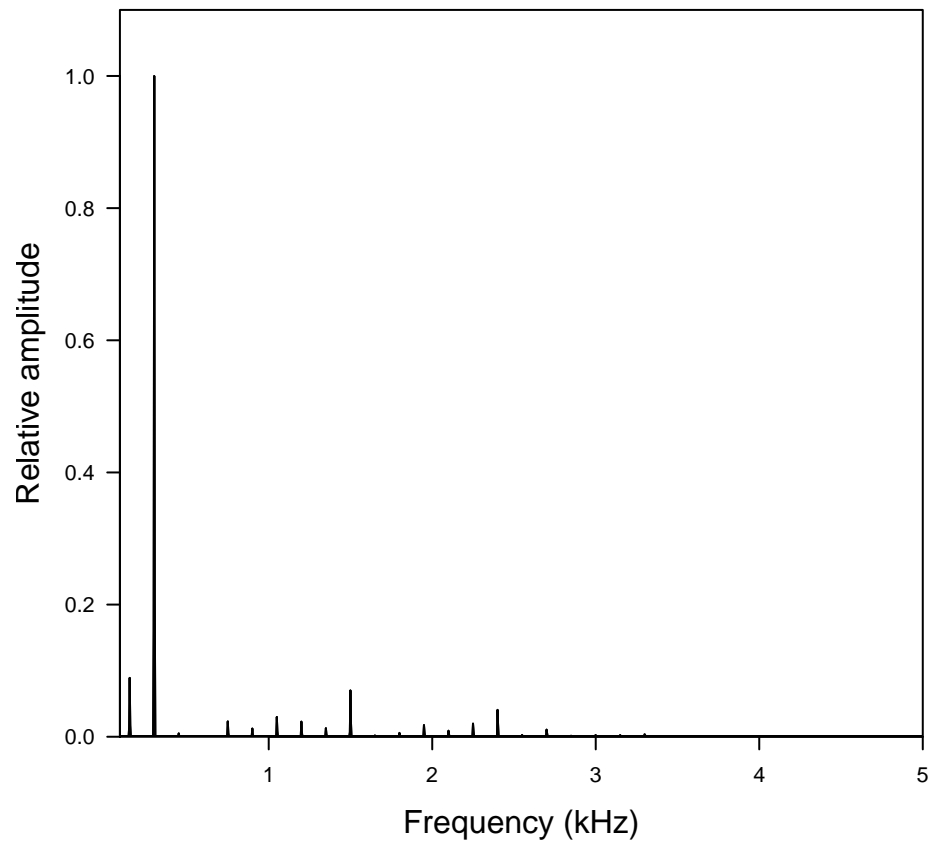

Vel. = 0.057 ; Str. = Receptacle ; Axis = y ; Fl. accession = 10-s-77-19

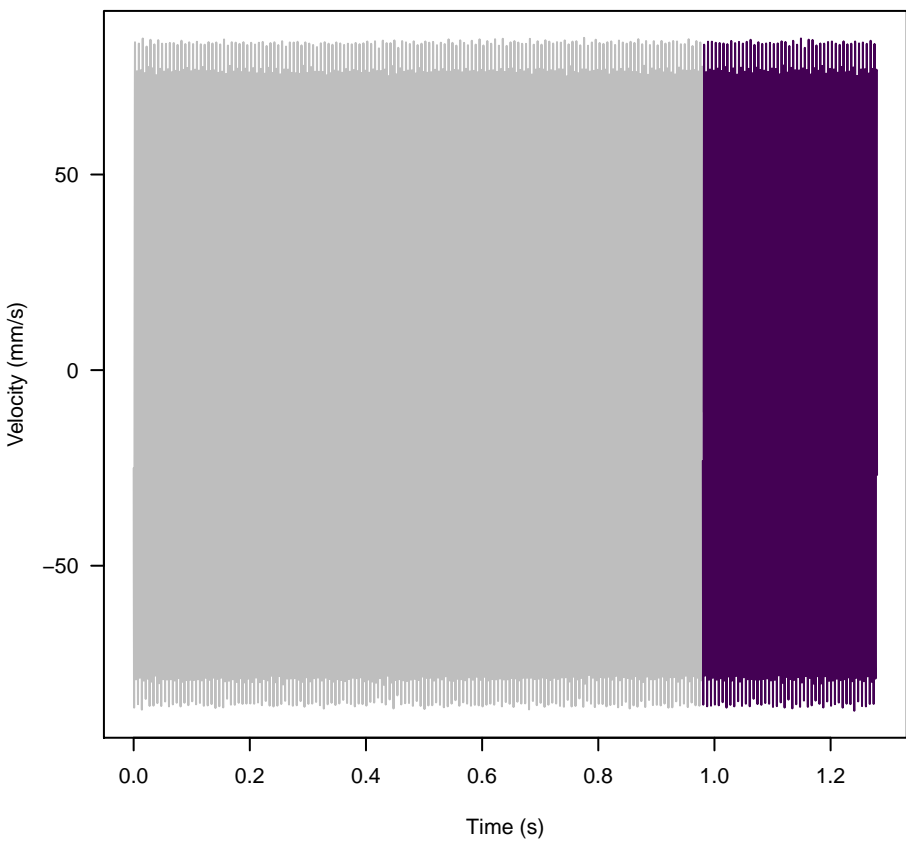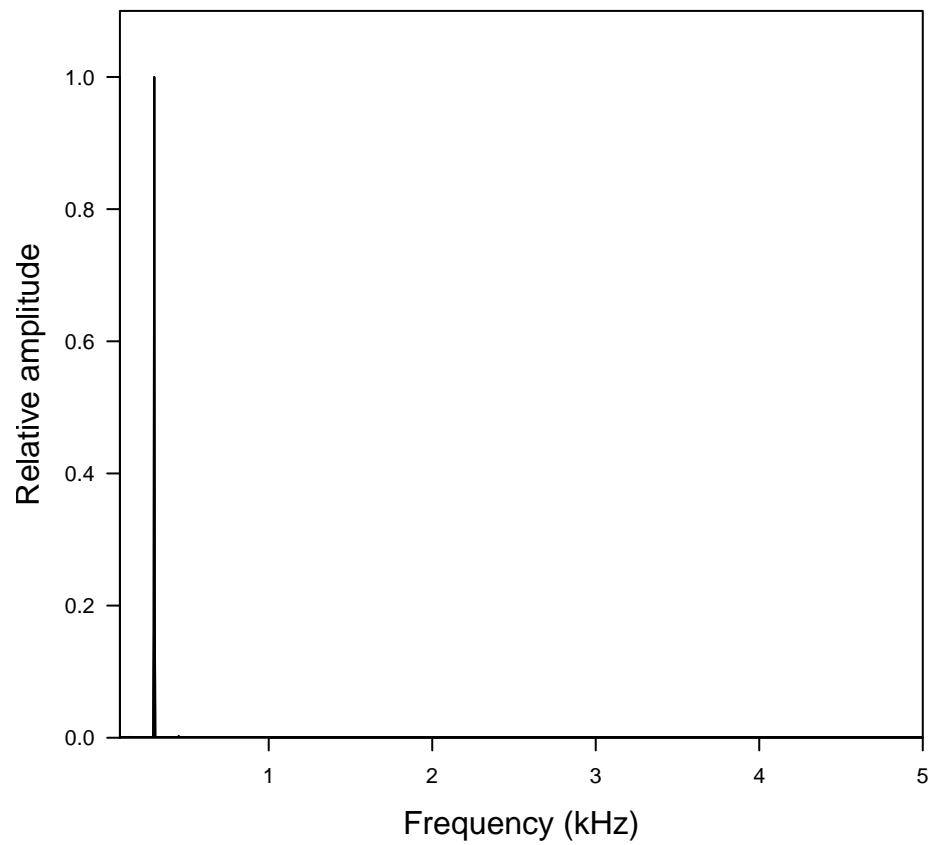

Vel. = 0.014 ; Str. = Corolla ; Axis = y ; Fl. accession = 10-s-77-3

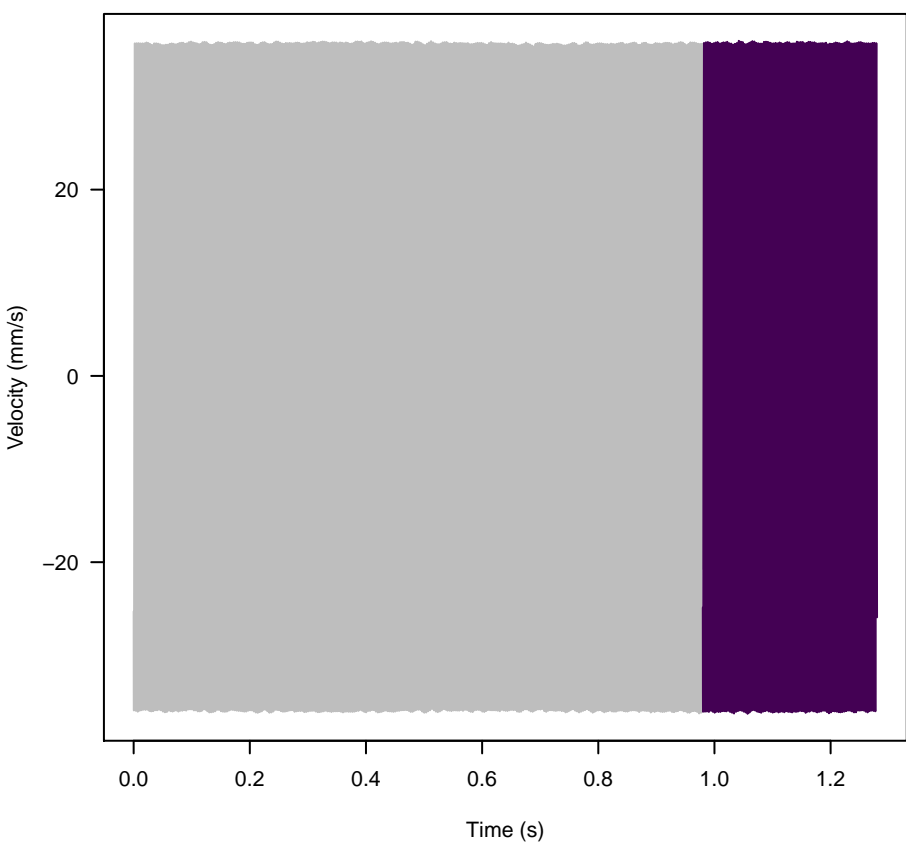

Vel. = 0.014 ; Str. = Receptacle ; Axis = y ; Fl. accession = 10-s-77-3

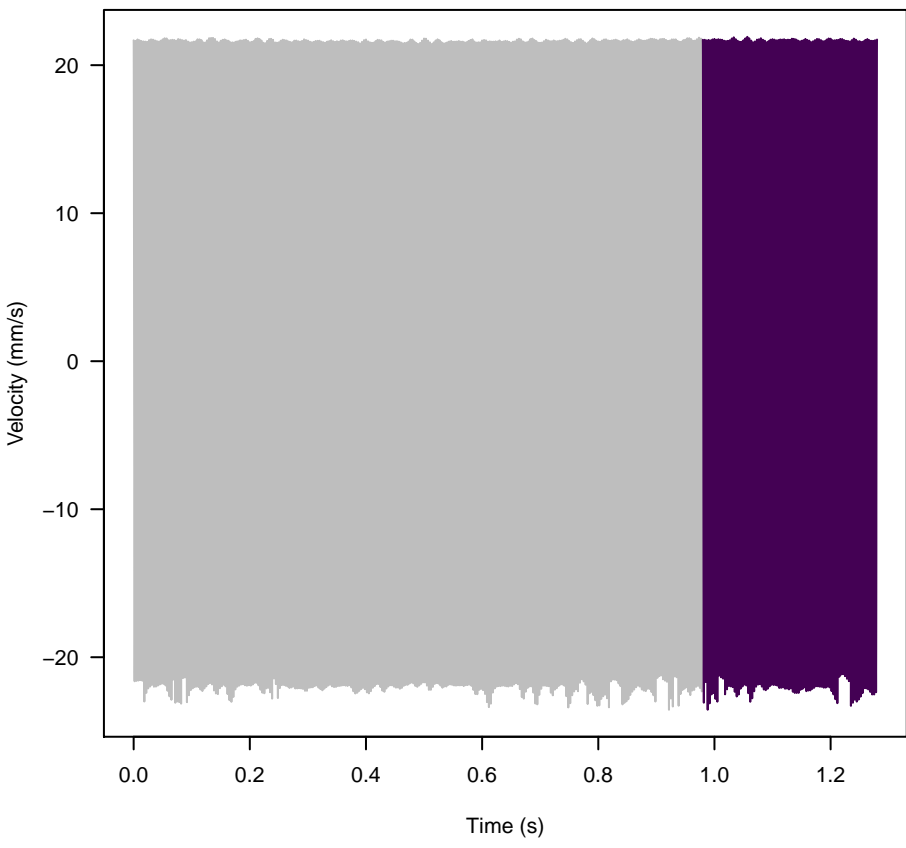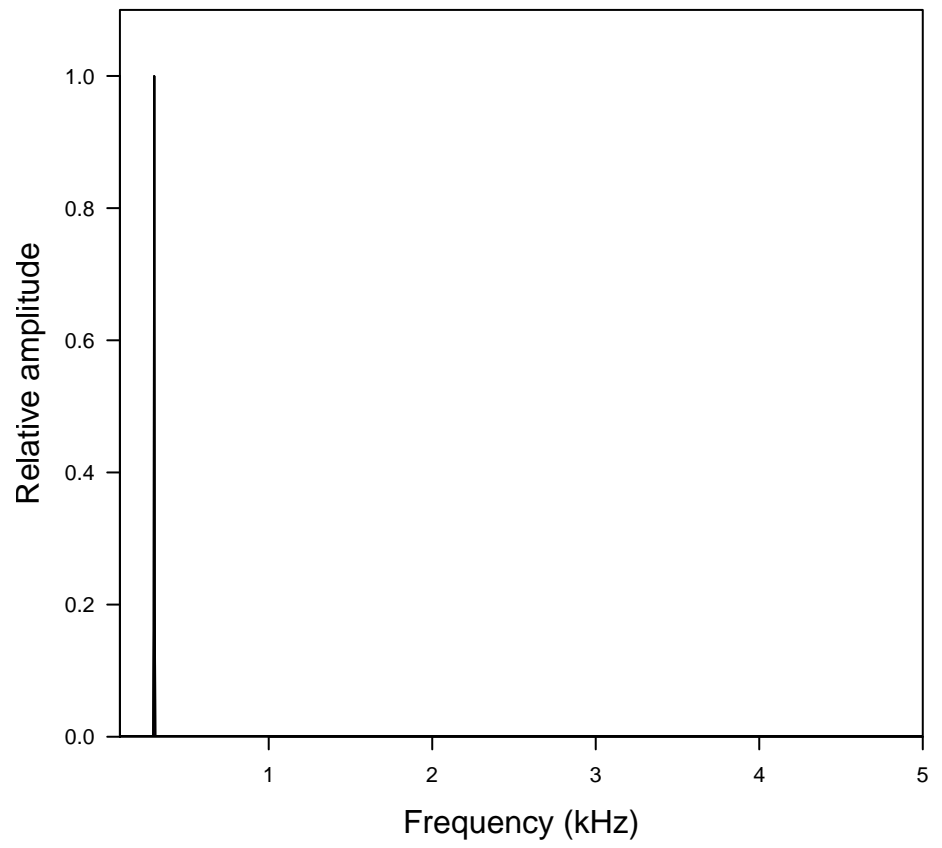

Vel. = 0.014 ; Str. = FA ; Axis = y ; Fl. accession = 10-s-77-3

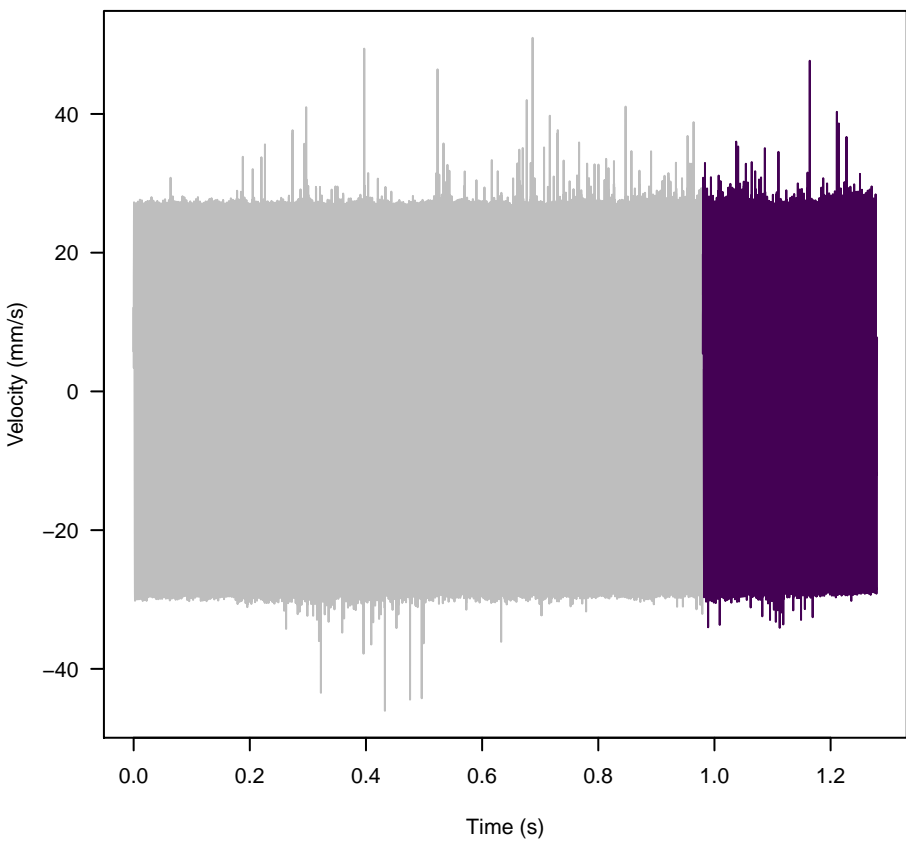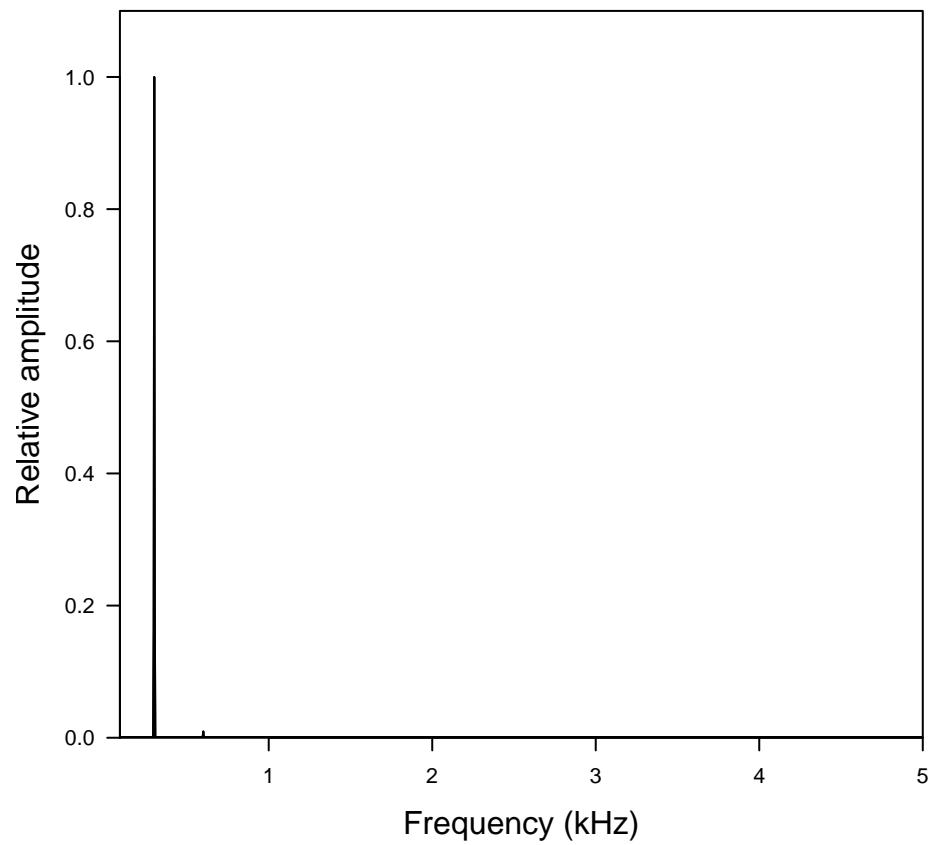

Vel. = 0.014 ; Str. = Receptacle ; Axis = y ; Fl. accession = 10-s-77-3

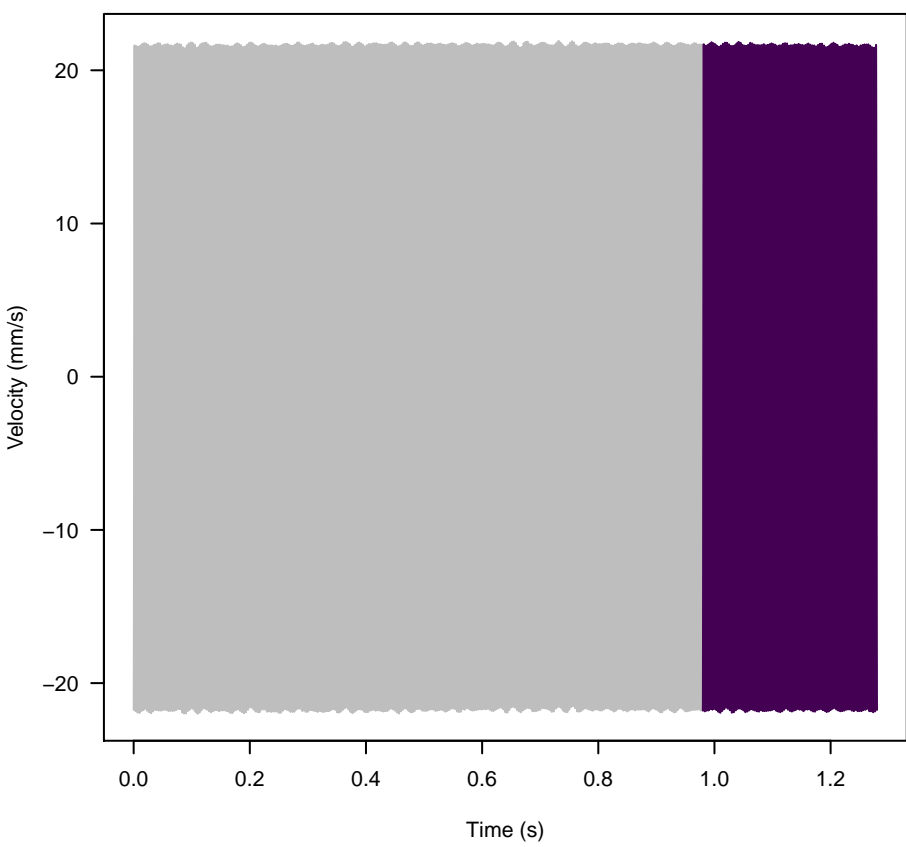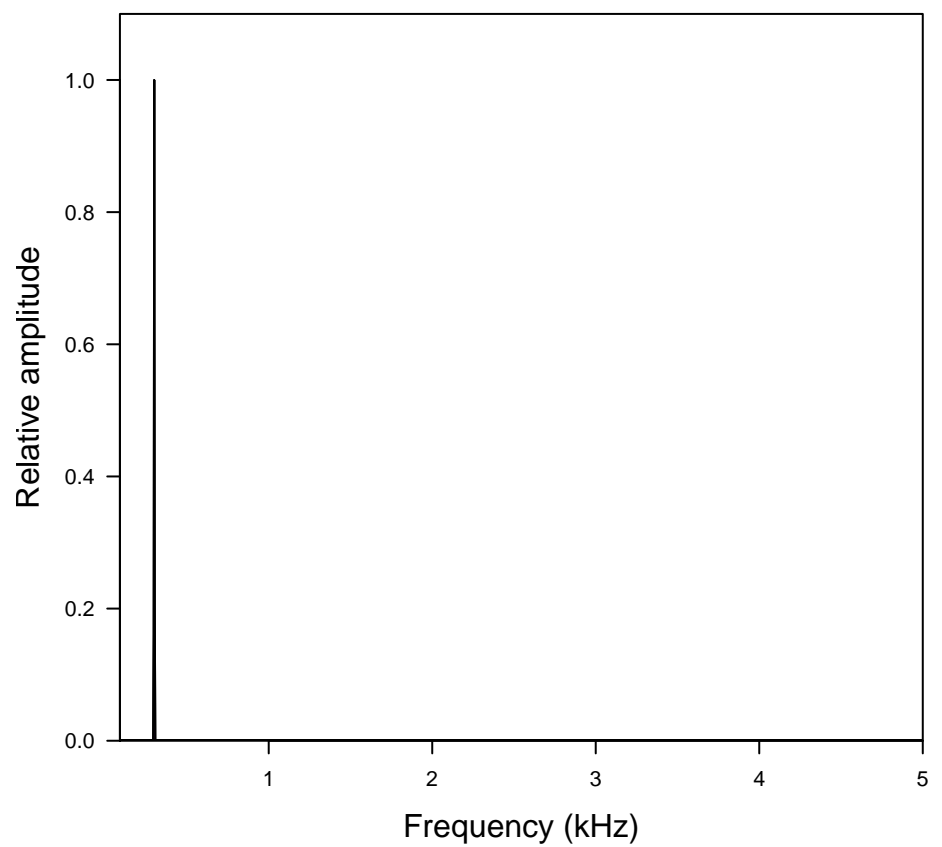

Vel. = 0.014 ; Str. = PA ; Axis = y ; Fl. accession = 10-s-77-3

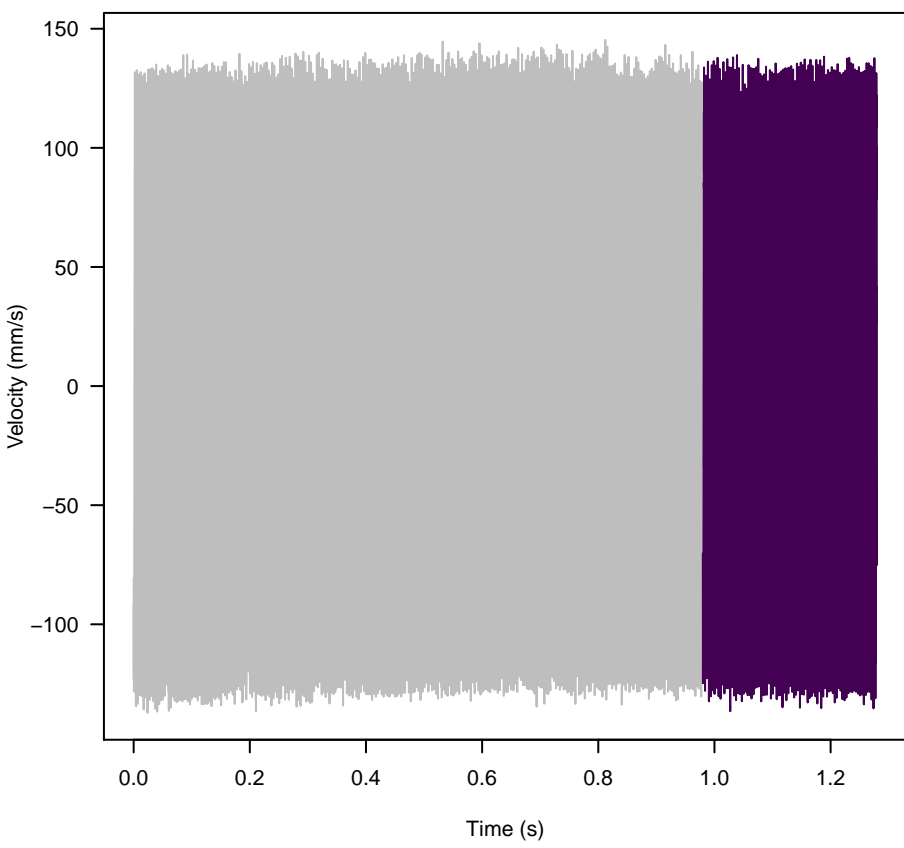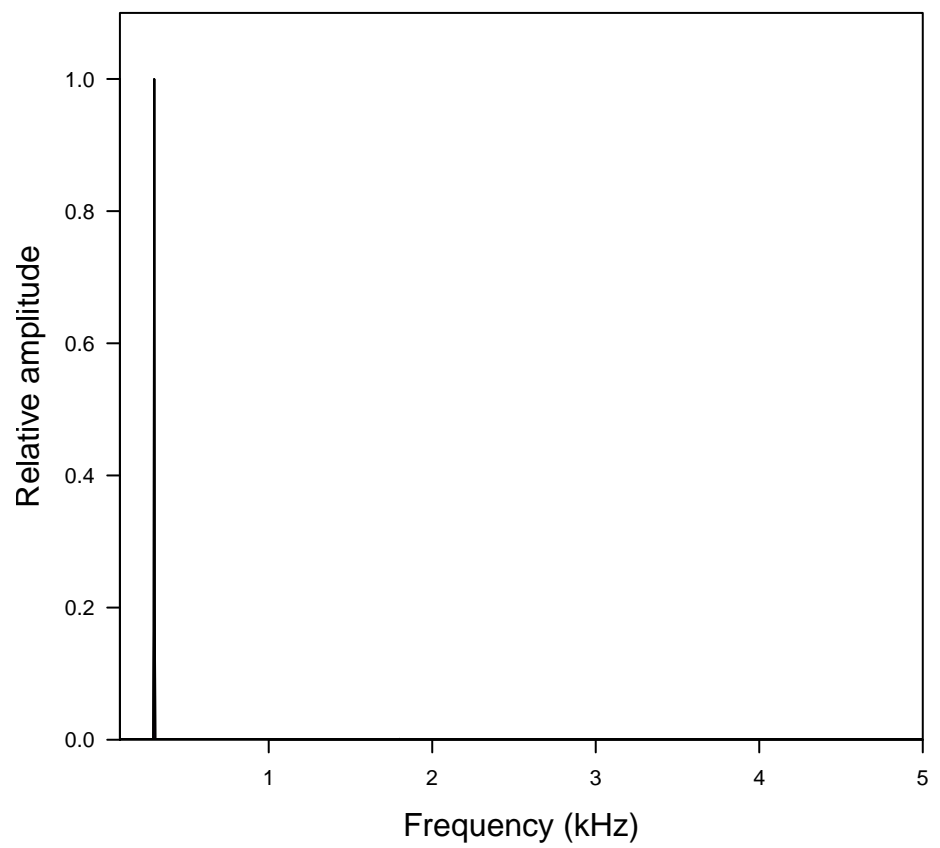

Vel. = 0.014 ; Str. = Receptacle ; Axis = y ; Fl. accession = 10-s-77-3

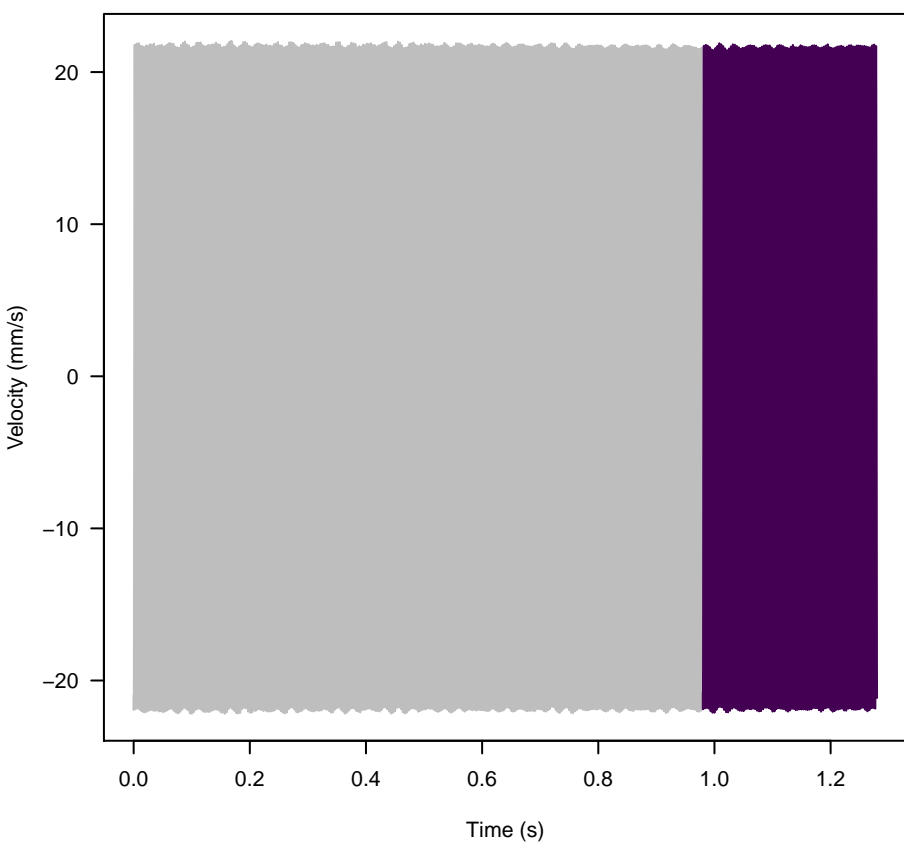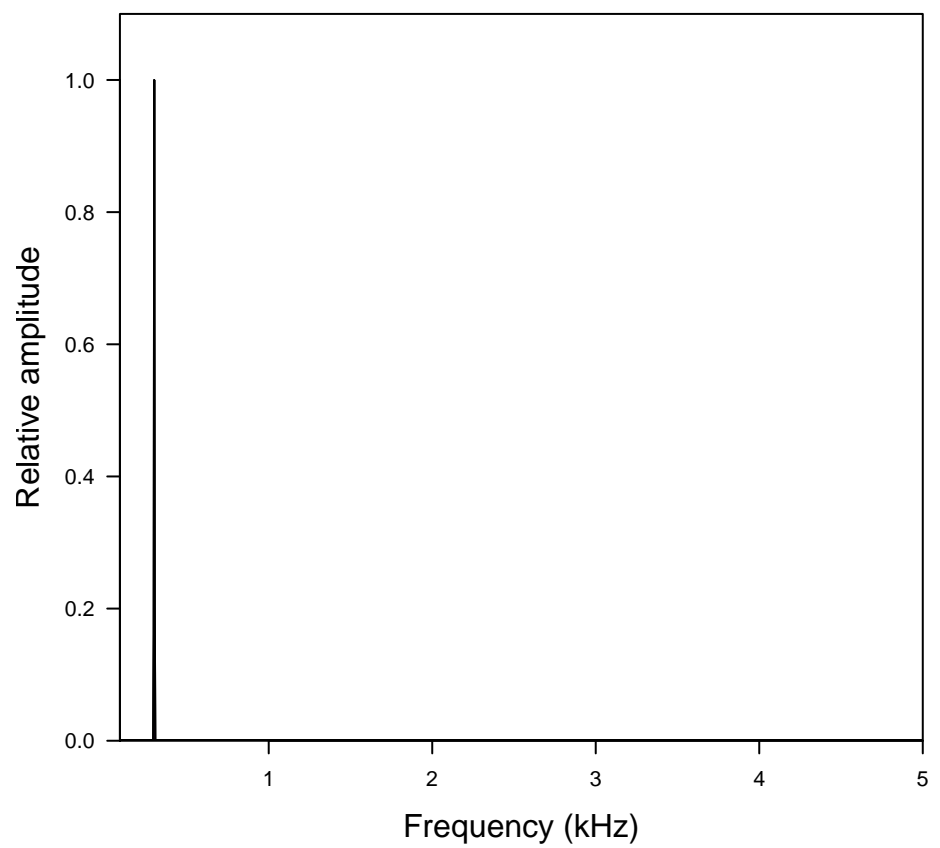

Vel. = 0.028 ; Str. = PA ; Axis = y ; Fl. accession = 10-s-77-3

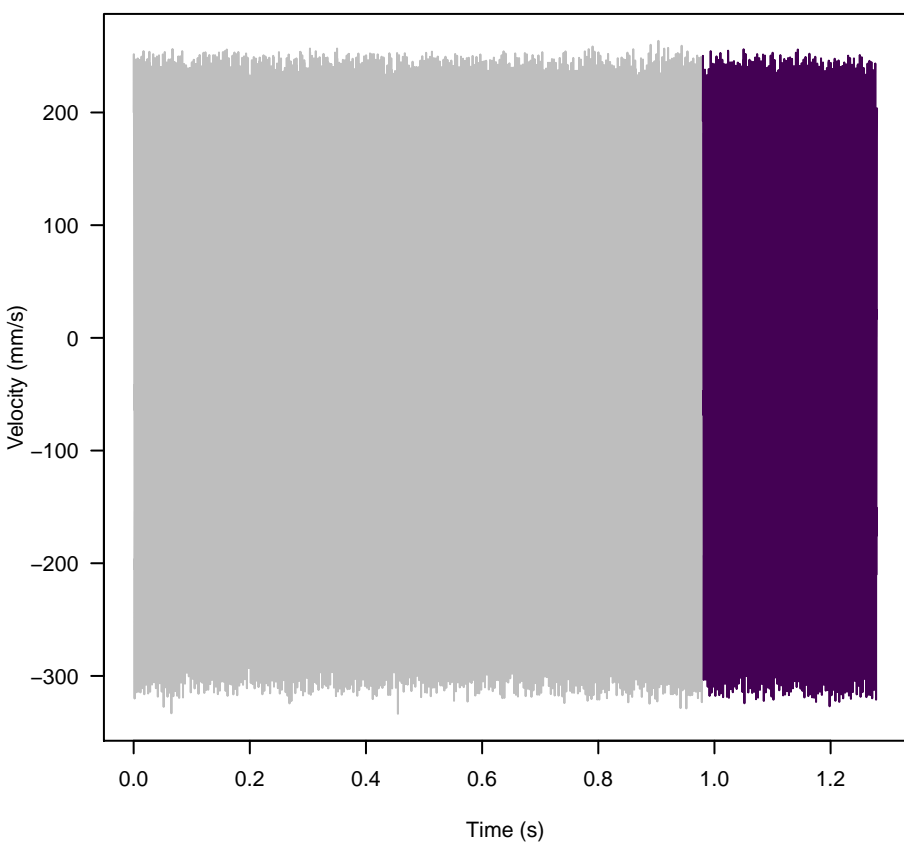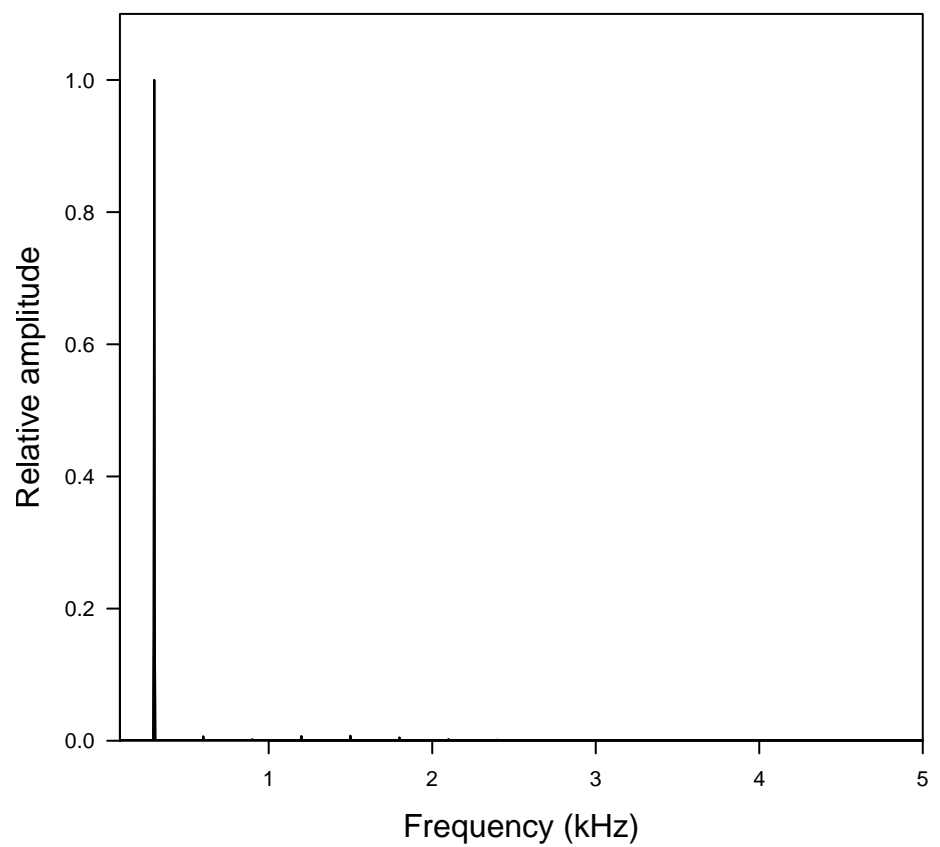



Vel. = 0.028 ; Str. = Receptacle ; Axis = y ; Fl. accession = 10-s-77-3

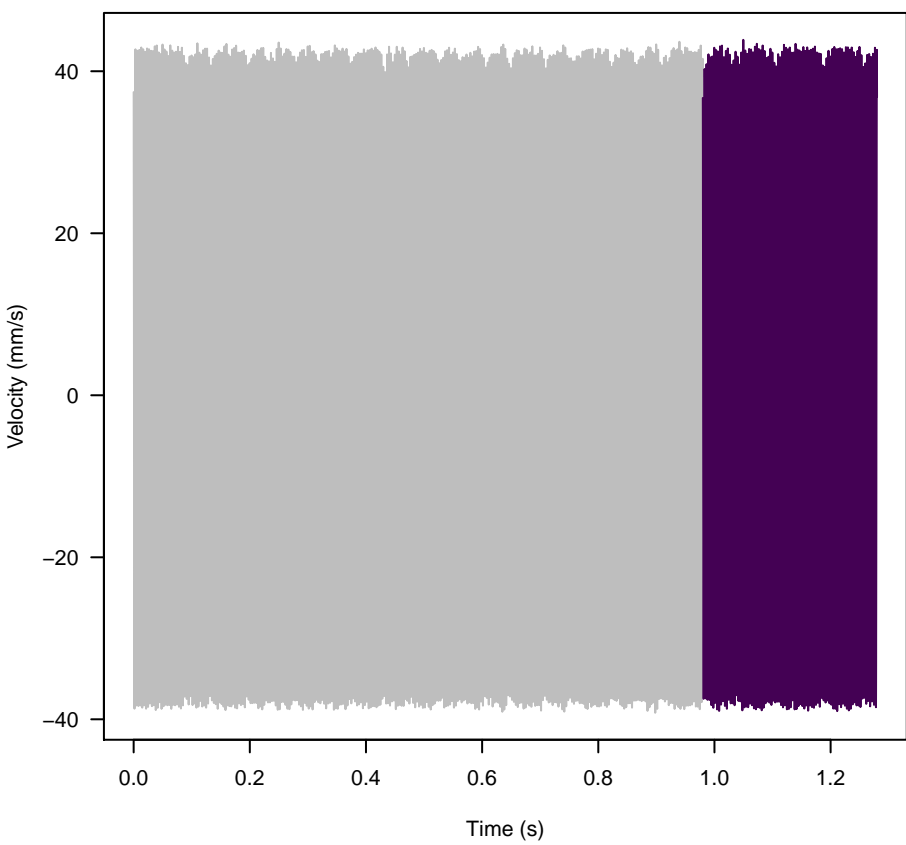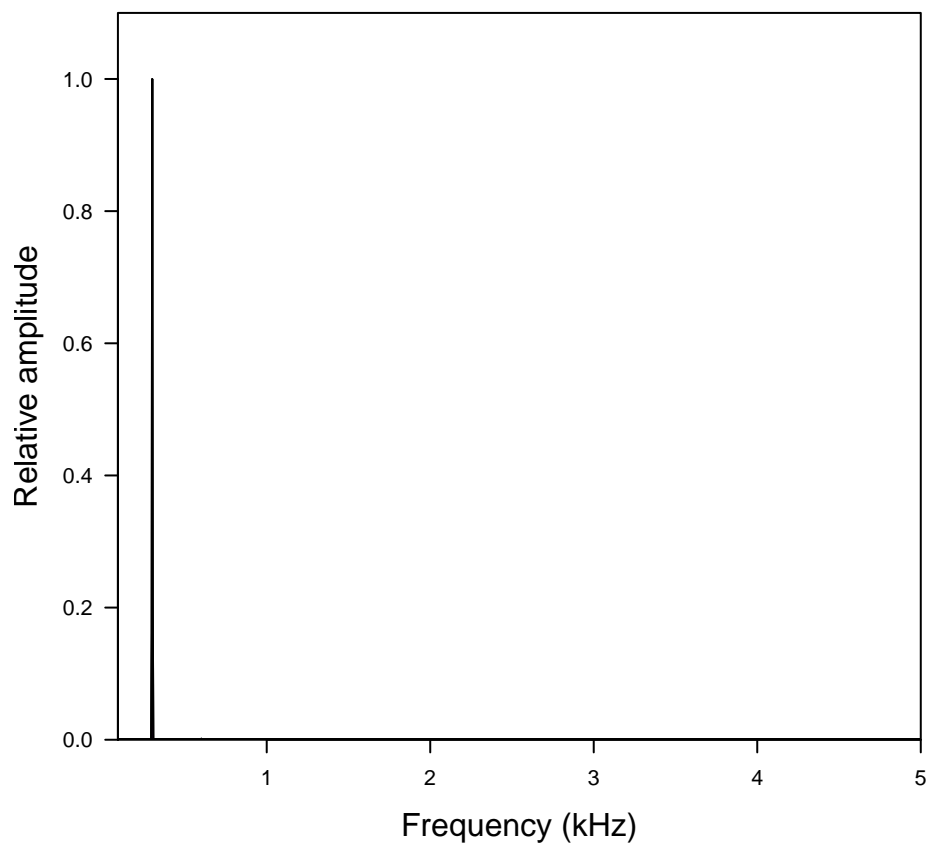

Vel. = 0.028 ; Str. = FA ; Axis = y ; Fl. accession = 10-s-77-3

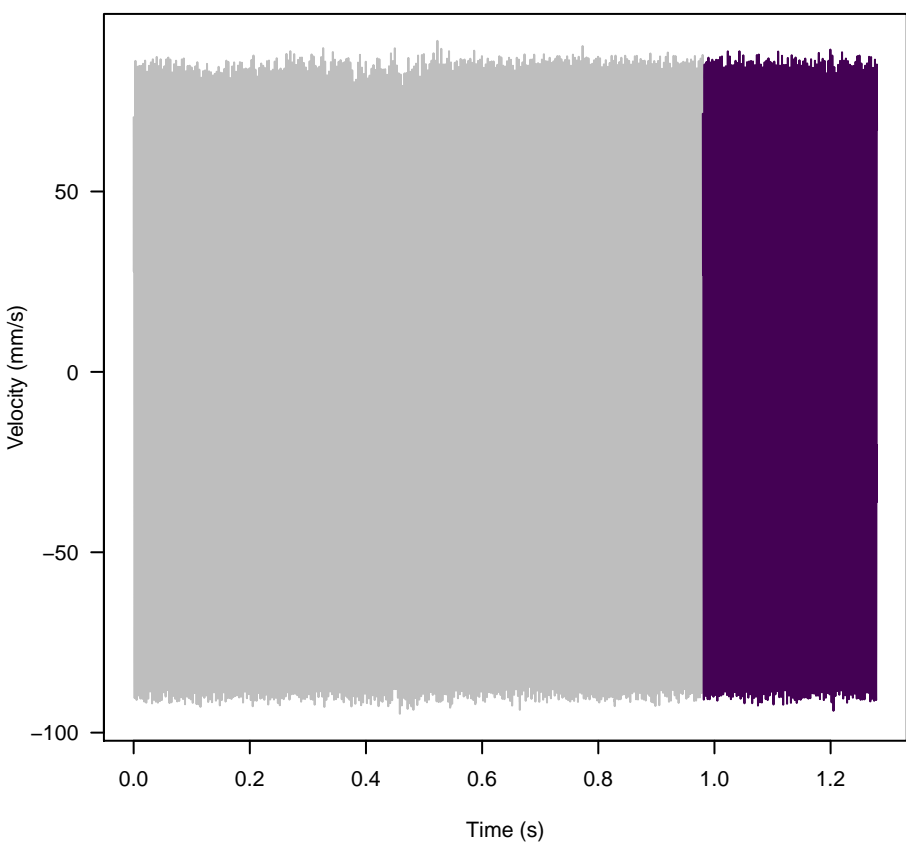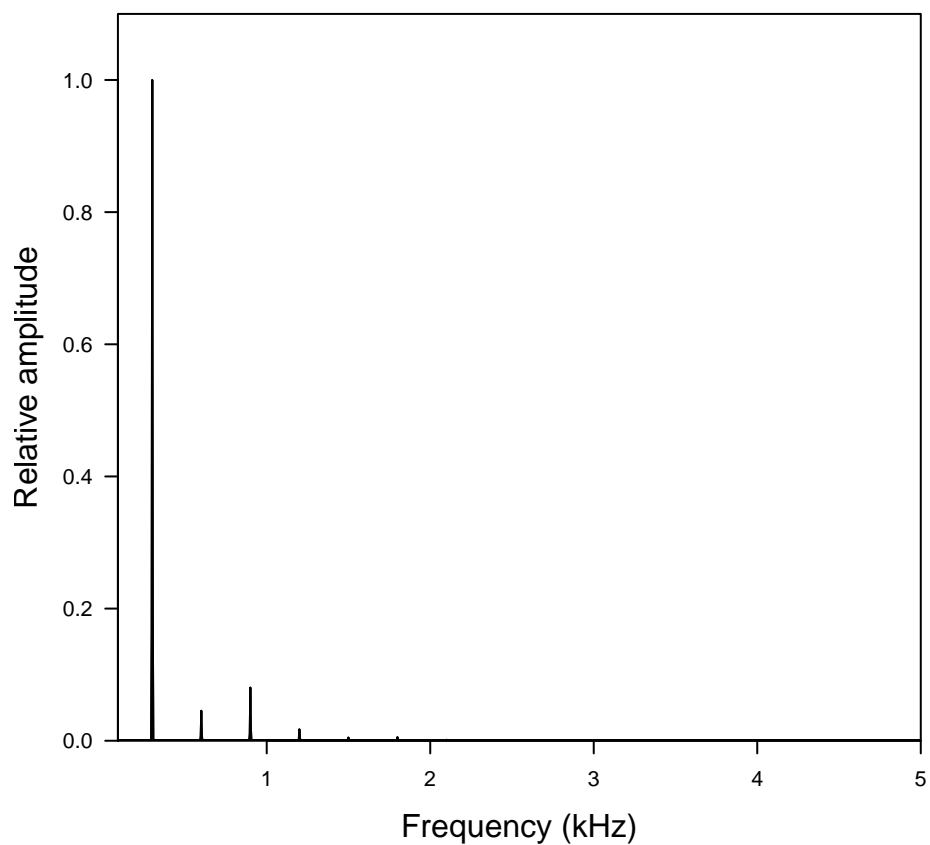

Vel. = 0.028 ; Str. = Receptacle ; Axis = y ; Fl. accession = 10-s-77-3

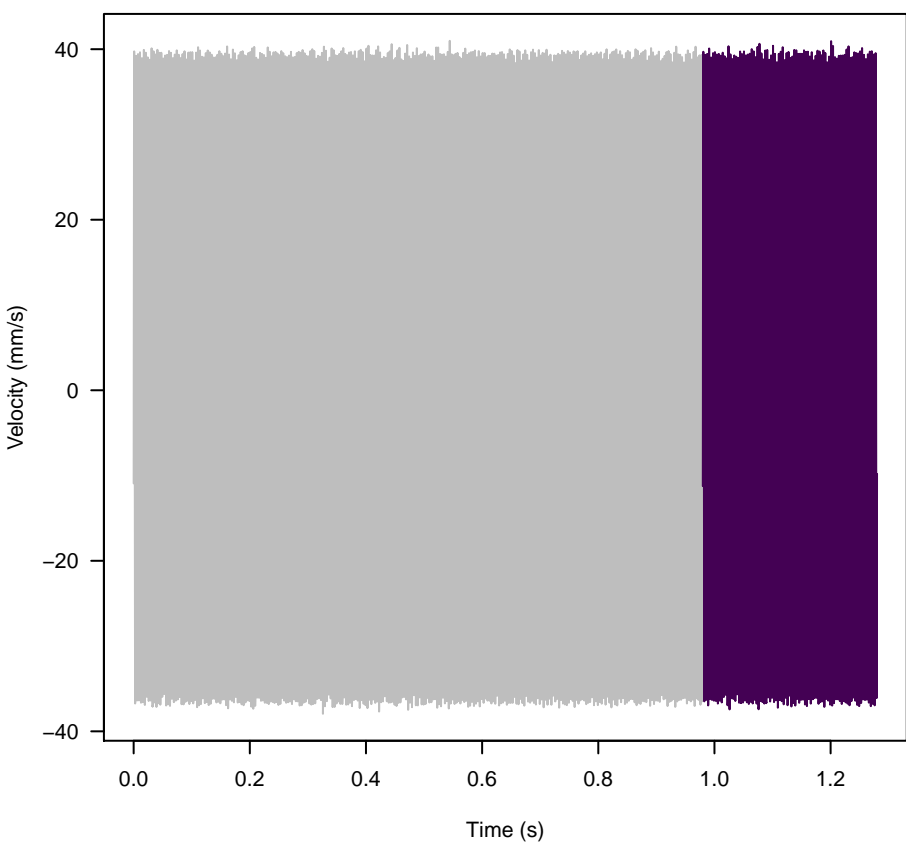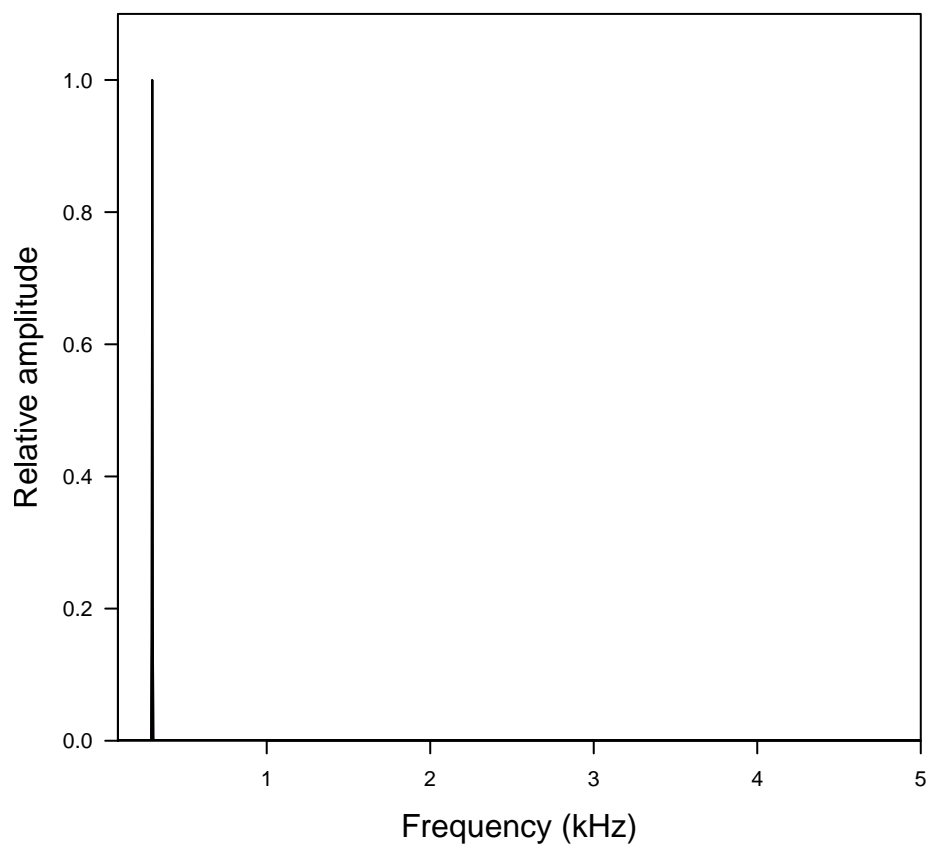

Vel. = 0.028 ; Str. = Corolla ; Axis = y ; Fl. accession = 10-s-77-3

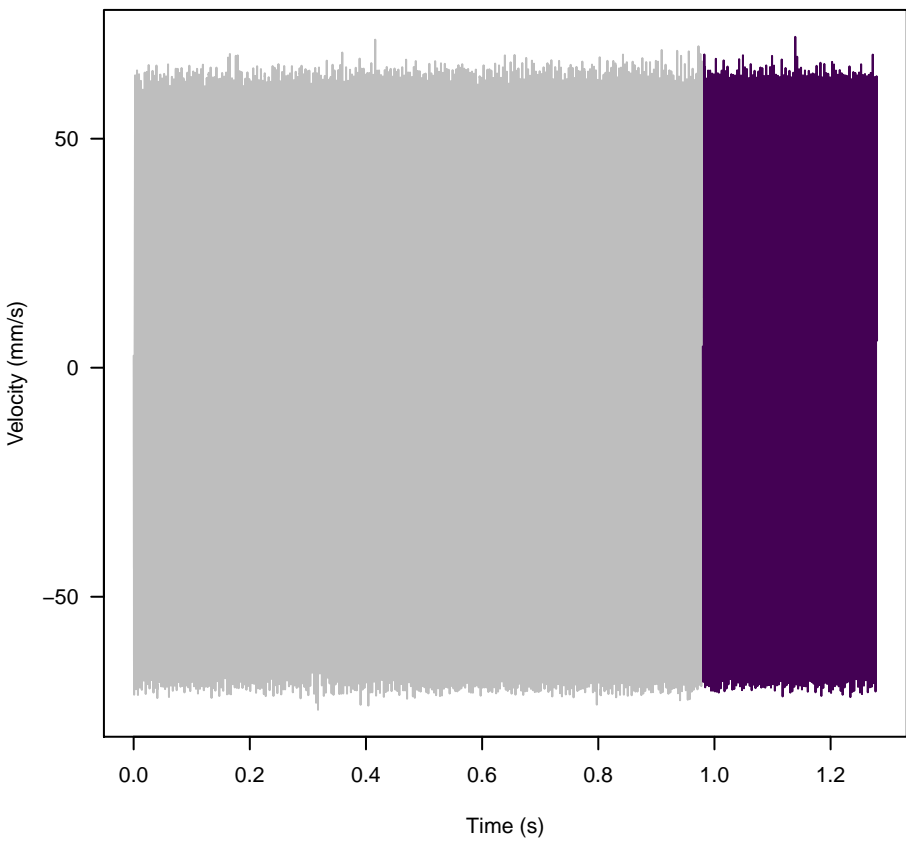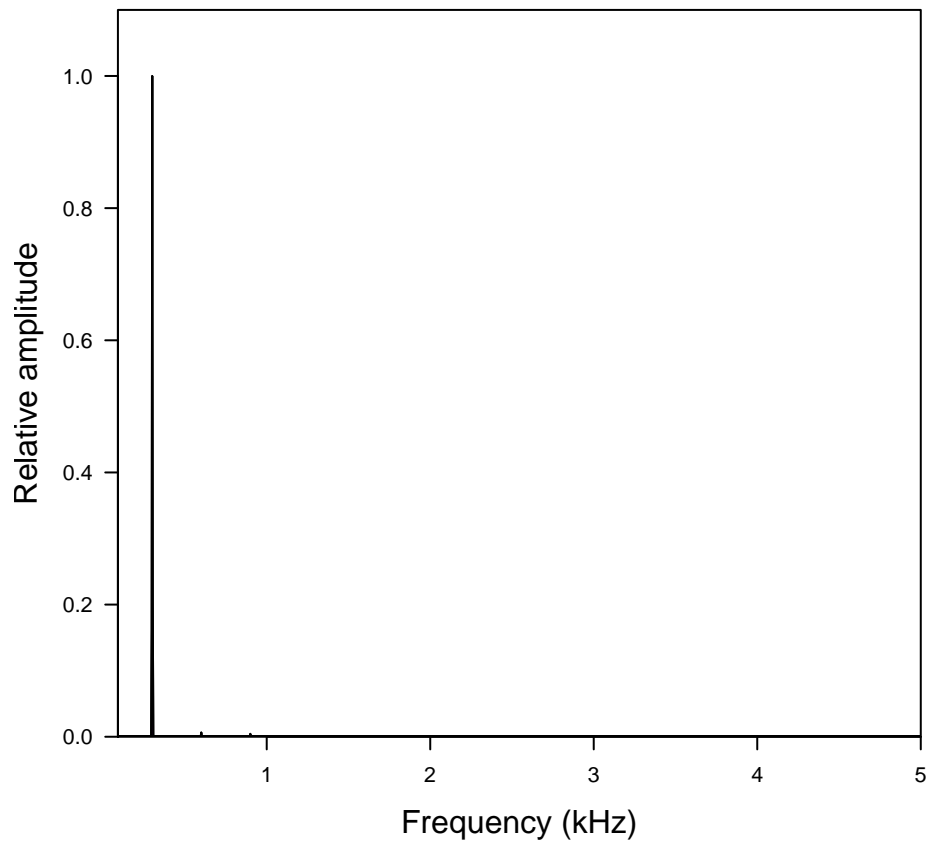

Vel. = 0.028 ; Str. = Receptacle ; Axis = y ; Fl. accession = 10-s-77-3

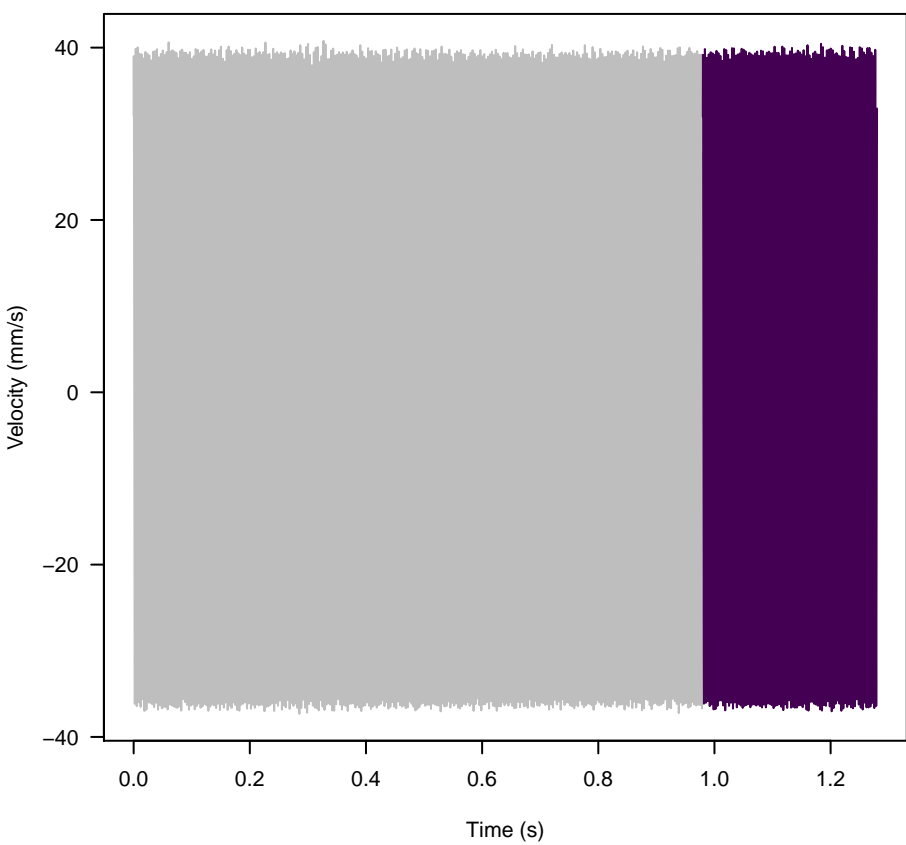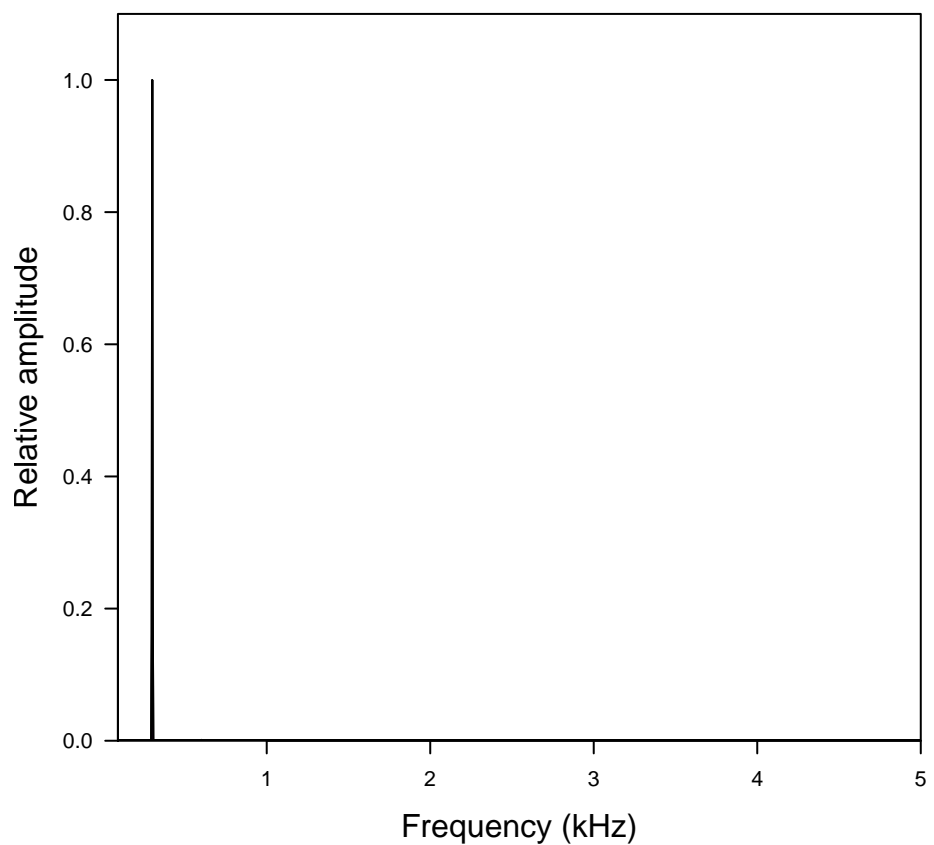

Vel. = 0.057 ; Str. = Corolla ; Axis = y ; Fl. accession = 10-s-77-3

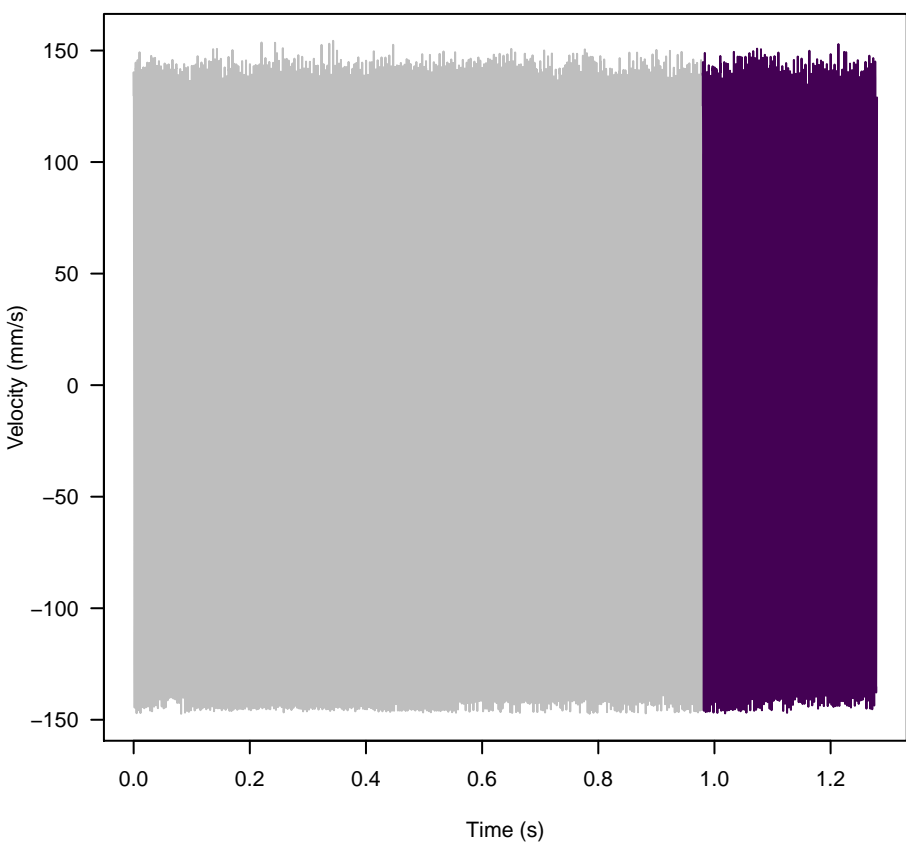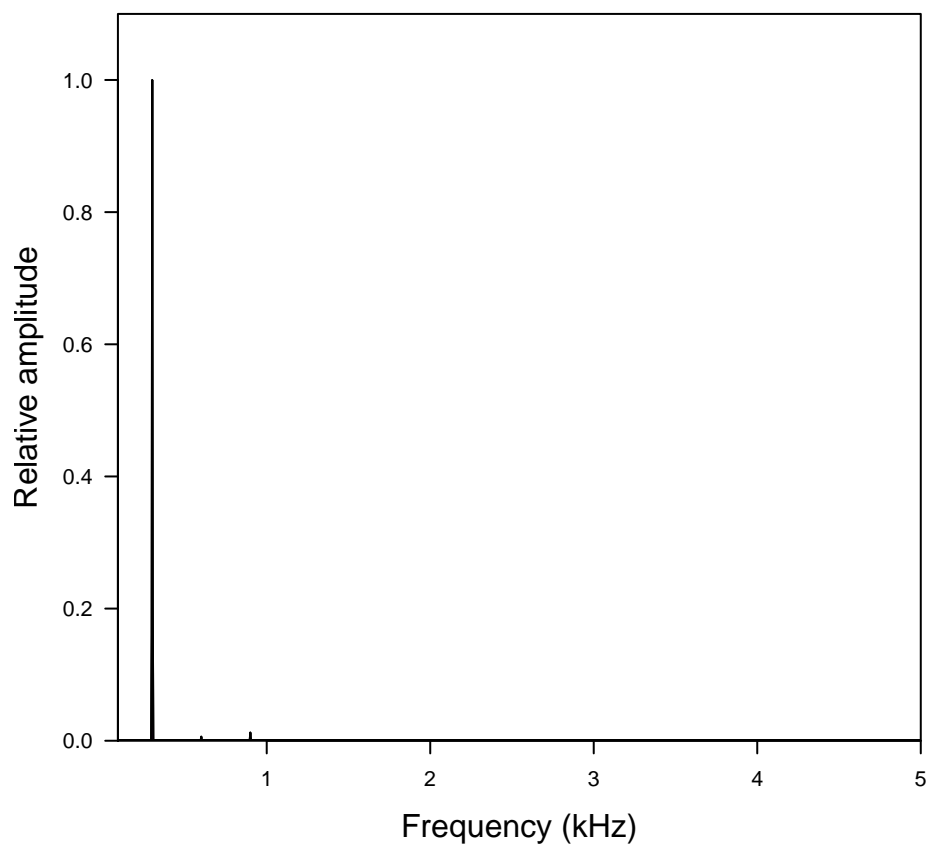

Vel. = 0.057 ; Str. = Receptacle ; Axis = y ; Fl. accession = 10-s-77-3

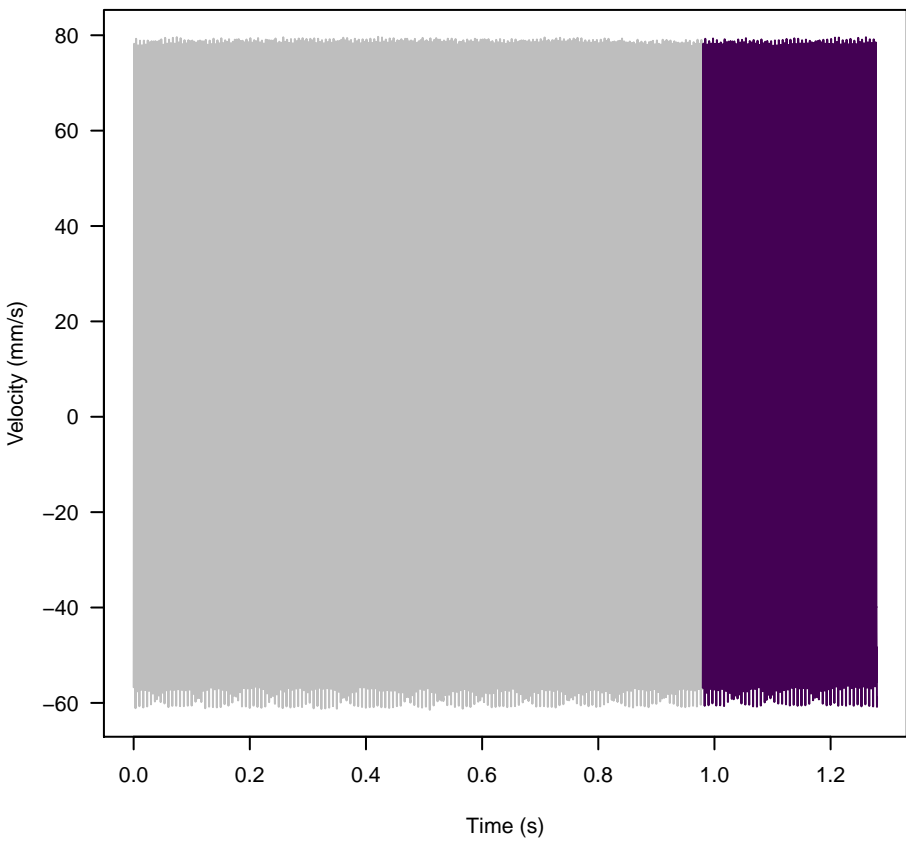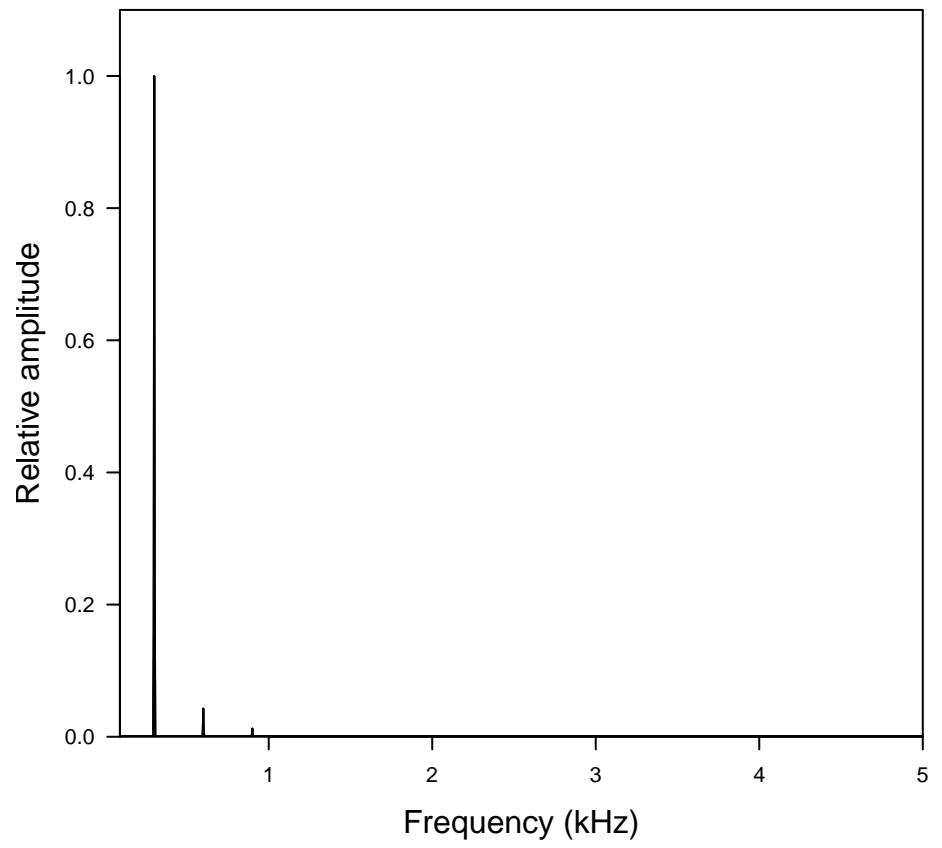

Vel. = 0.057 ; Str. = FA ; Axis = y ; Fl. accession = 10-s-77-3

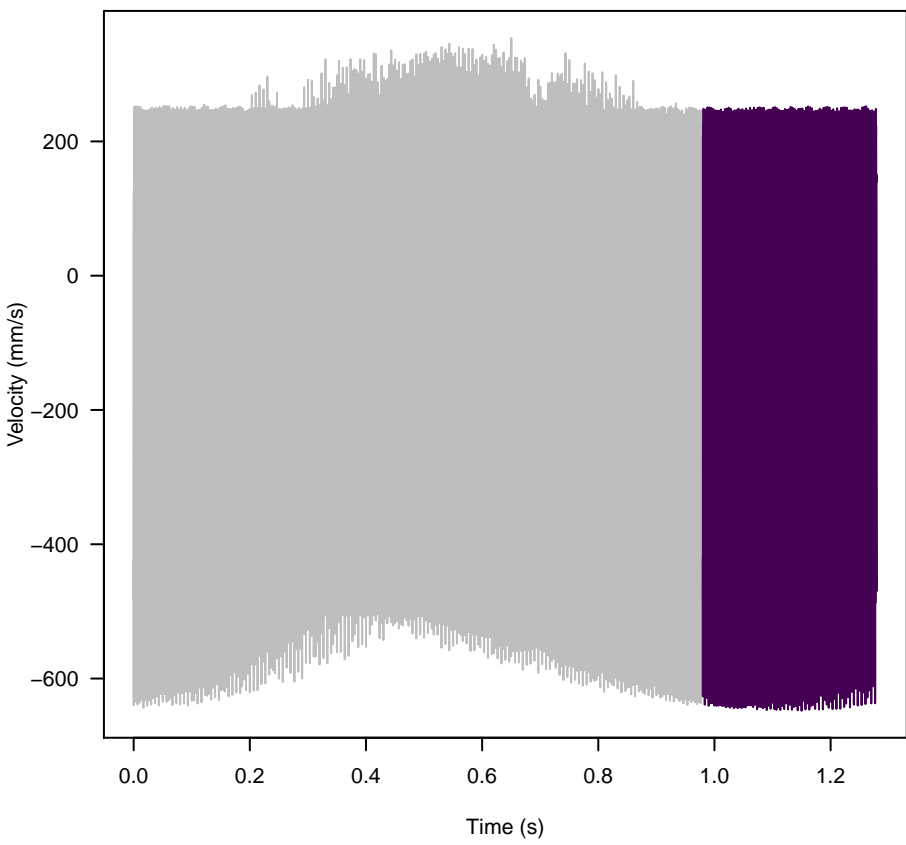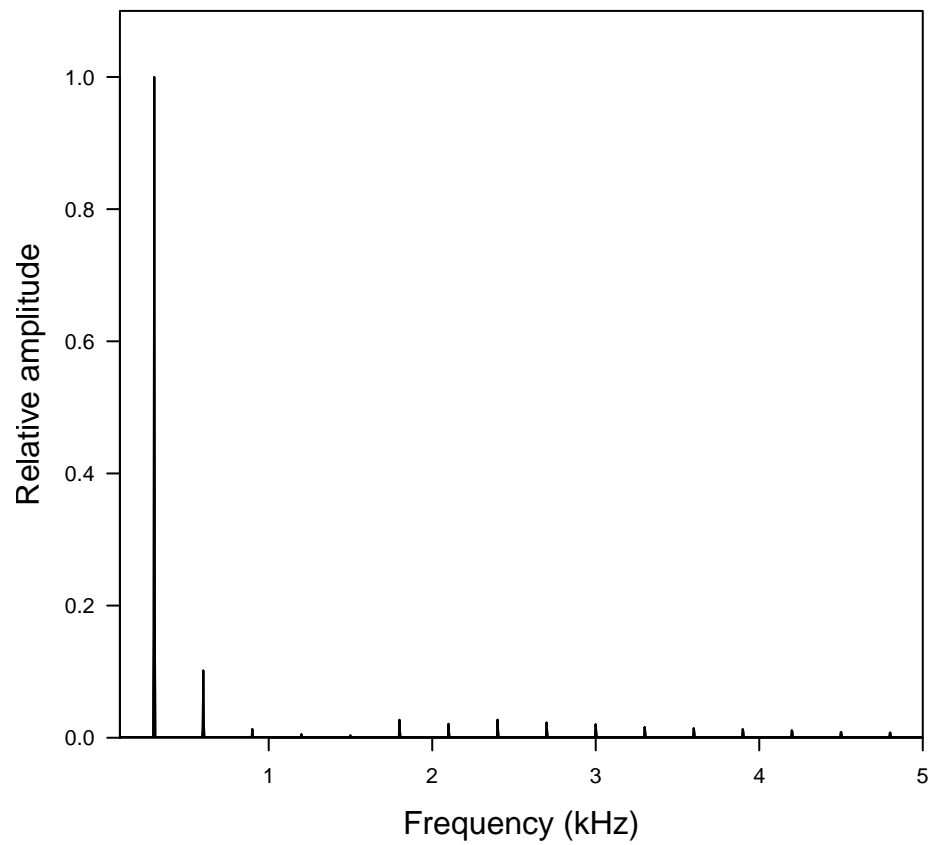

Vel. = 0.057 ; Str. = Receptacle ; Axis = y ; Fl. accession = 10-s-77-3

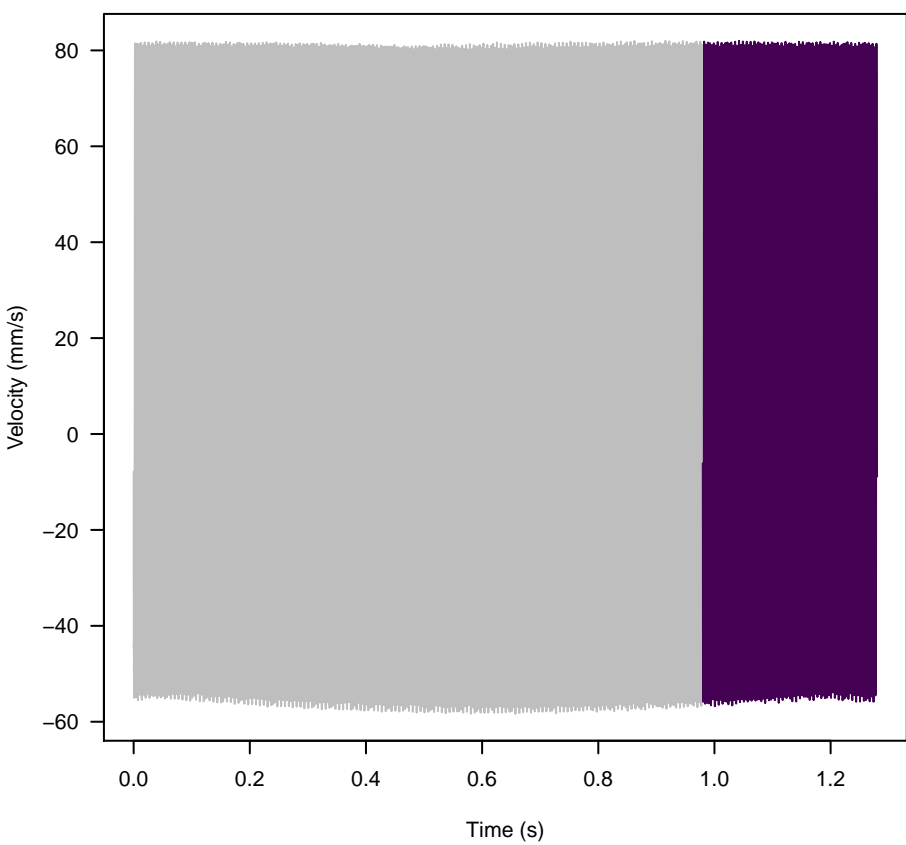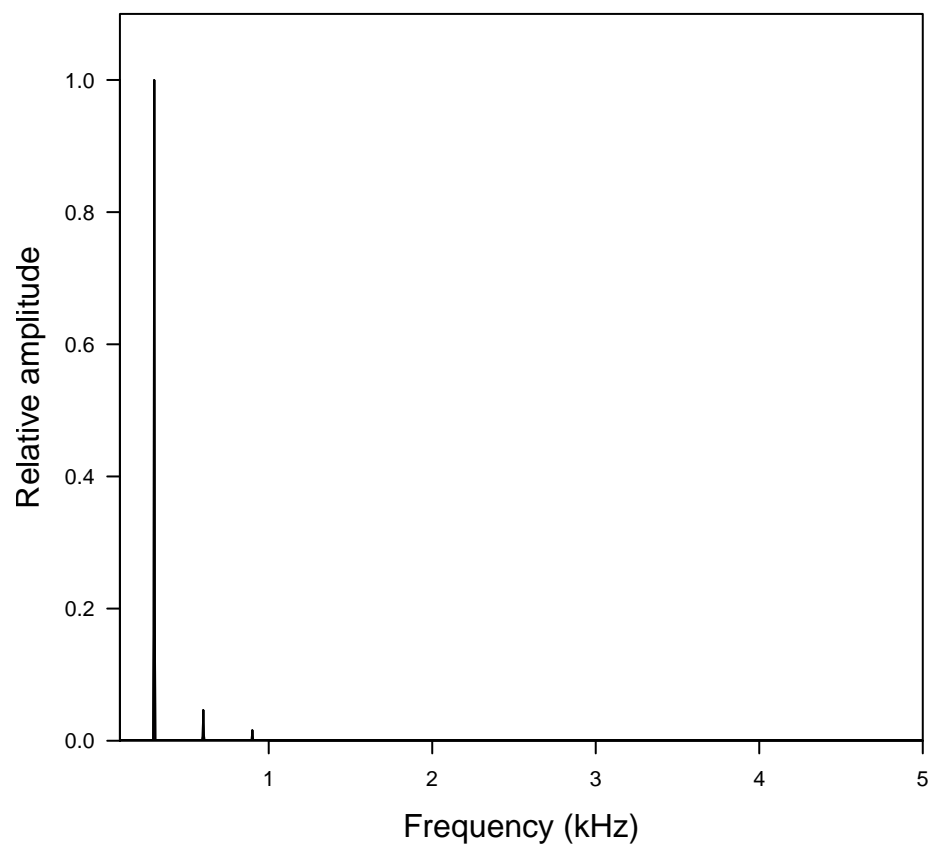

Vel. = 0.057 ; Str. = PA ; Axis = y ; Fl. accession = 10-s-77-3

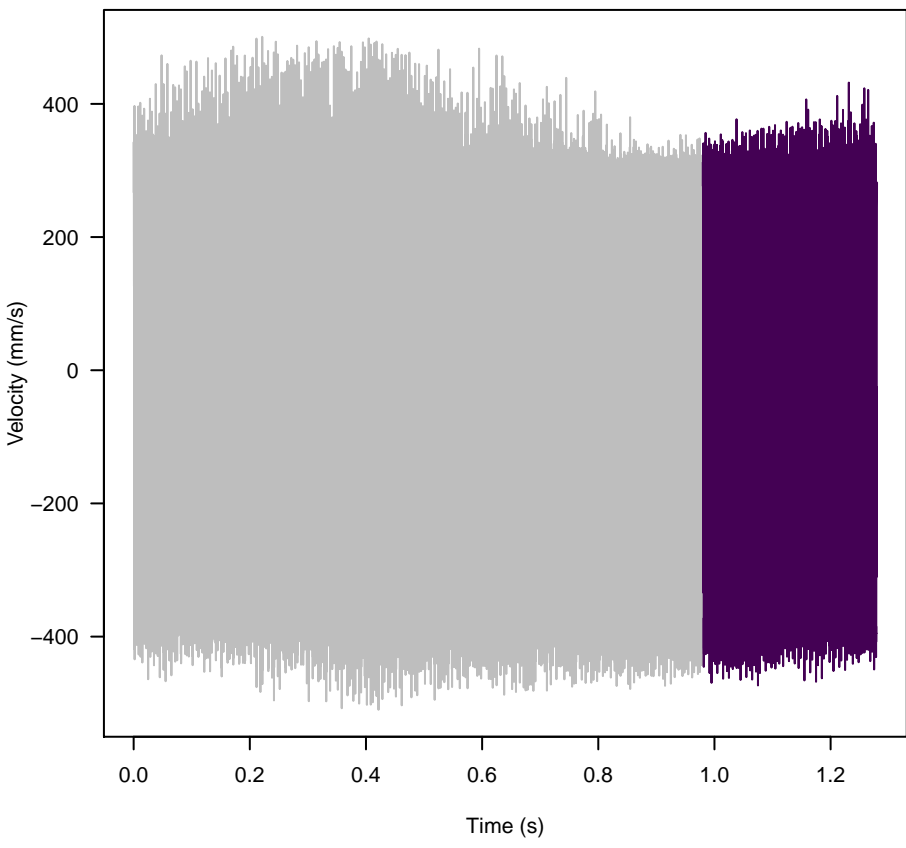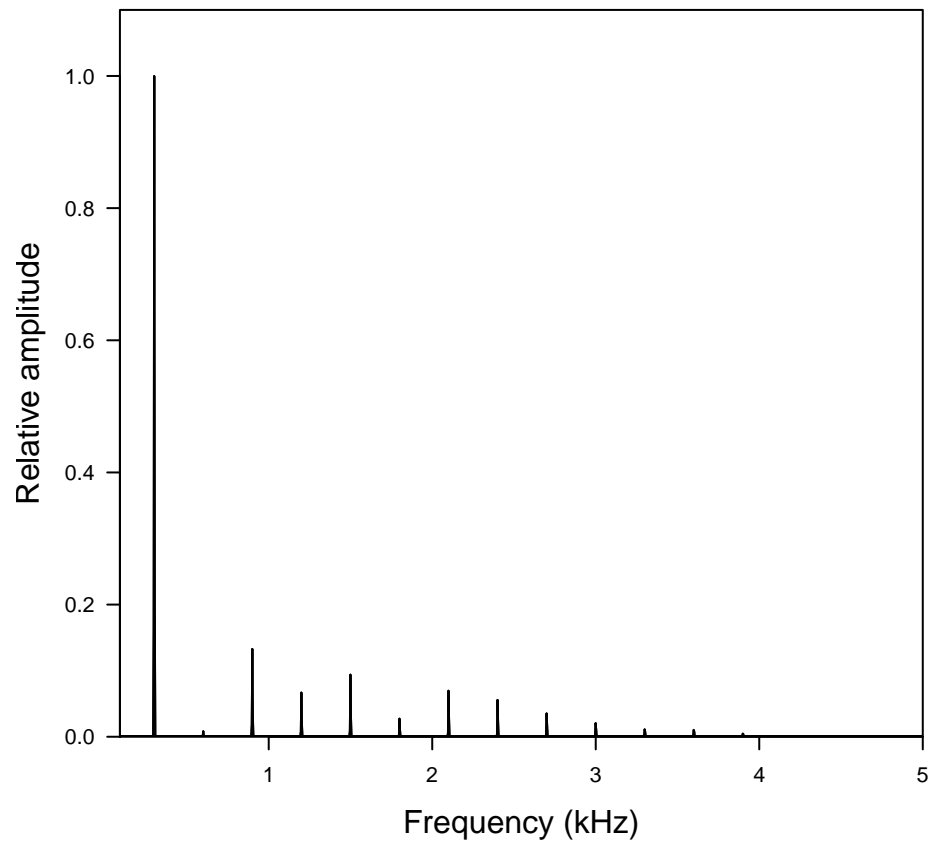

Vel. = 0.057 ; Str. = Receptacle ; Axis = y ; Fl. accession = 10-s-77-3

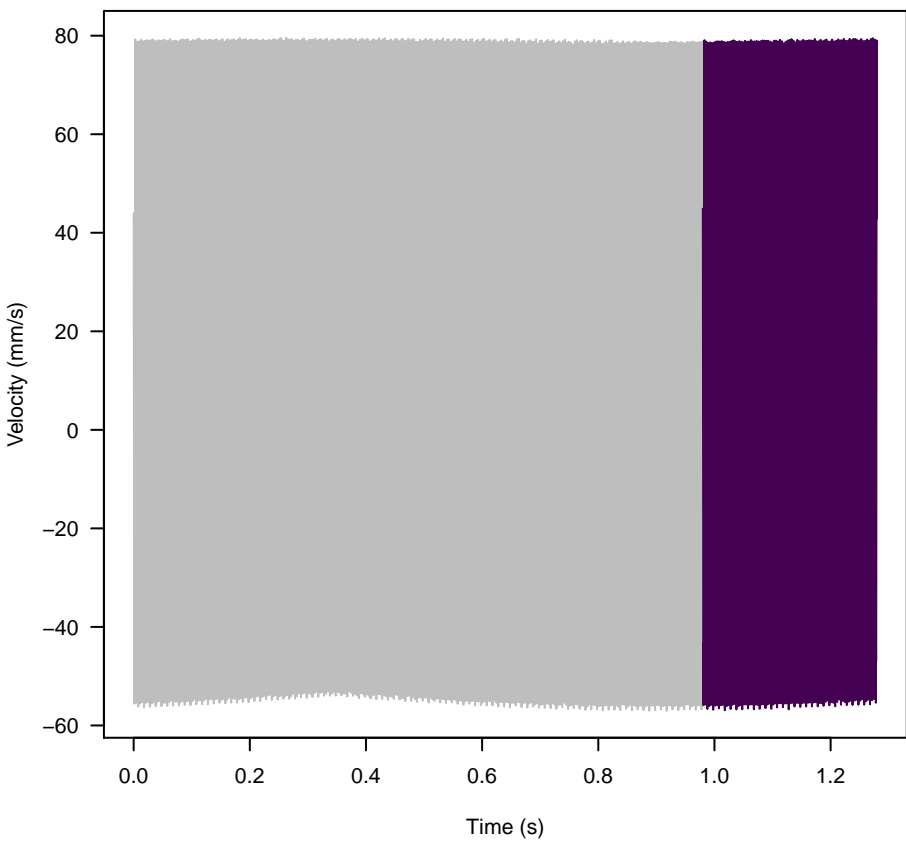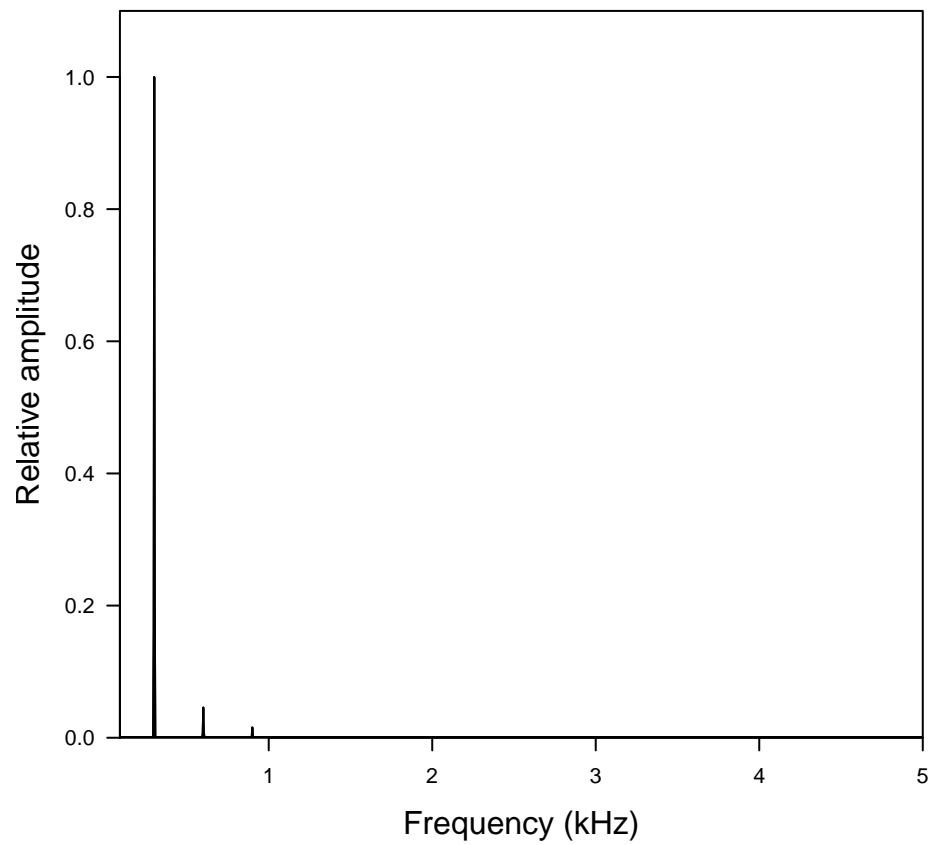

Vel. = 0.057 ; Str. = Corolla ; Axis = z ; Fl. accession = 10-s-77-3

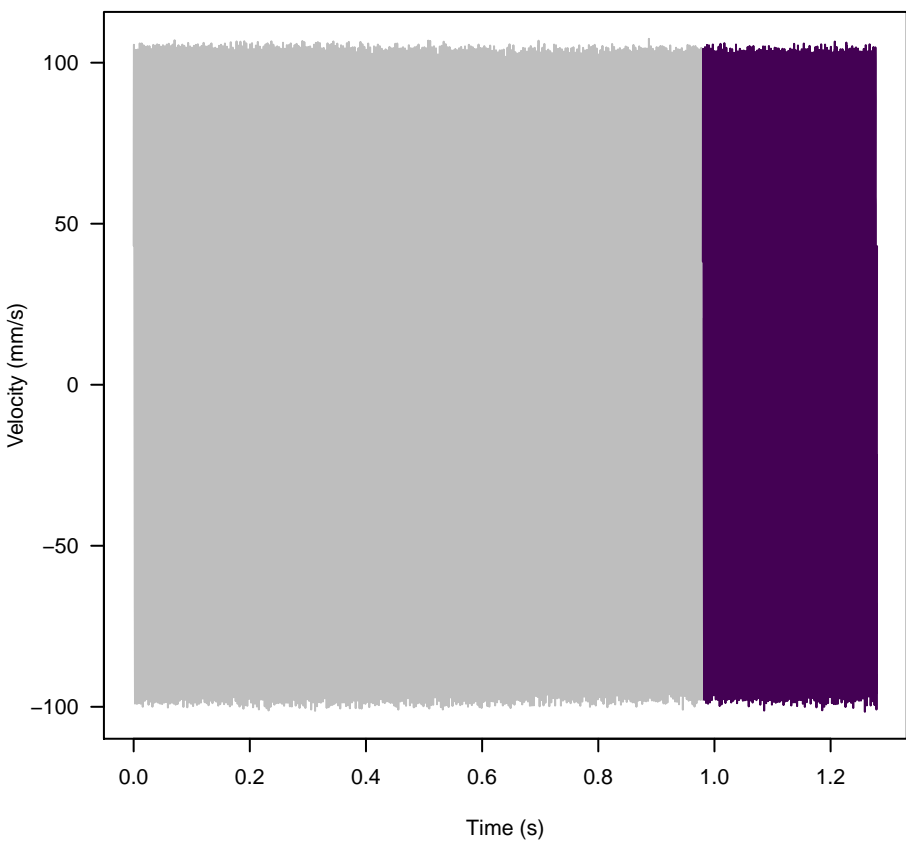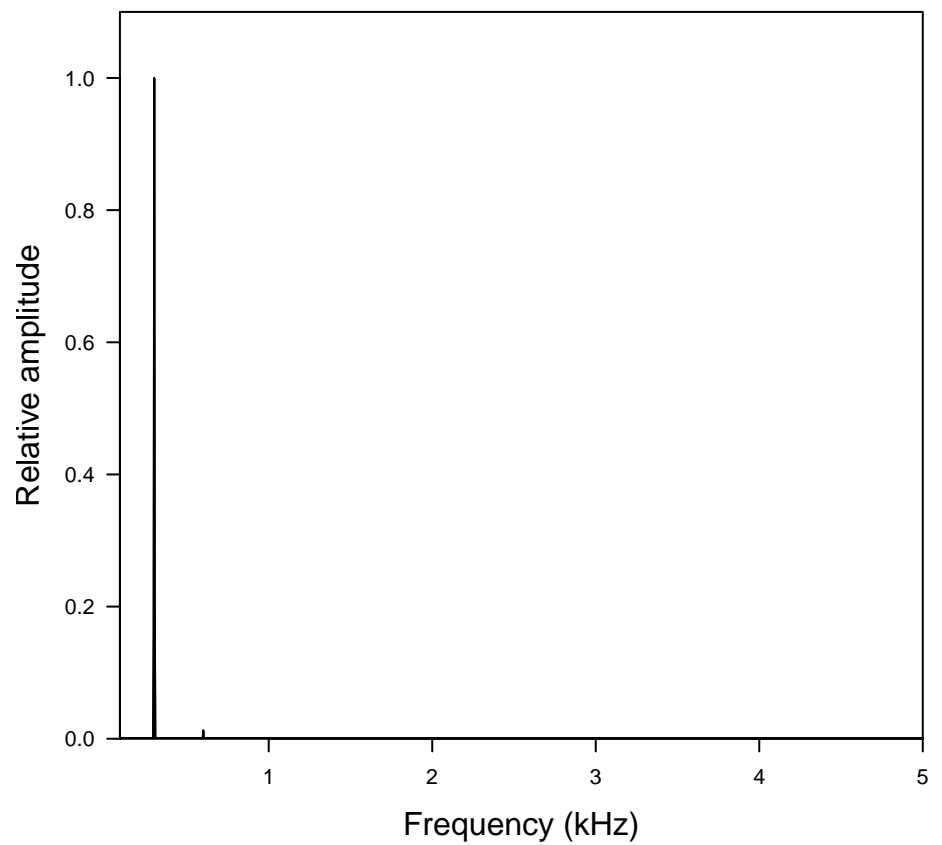

Vel. = 0.057 ; Str. = Receptacle ; Axis = z ; Fl. accession = 10-s-77-3

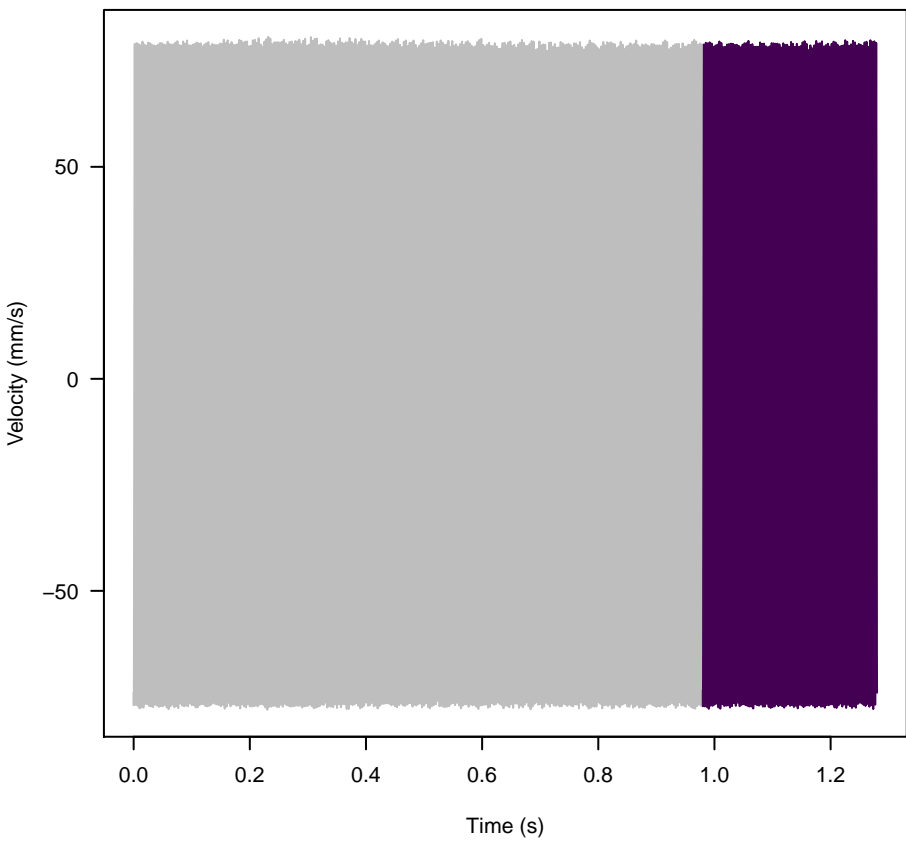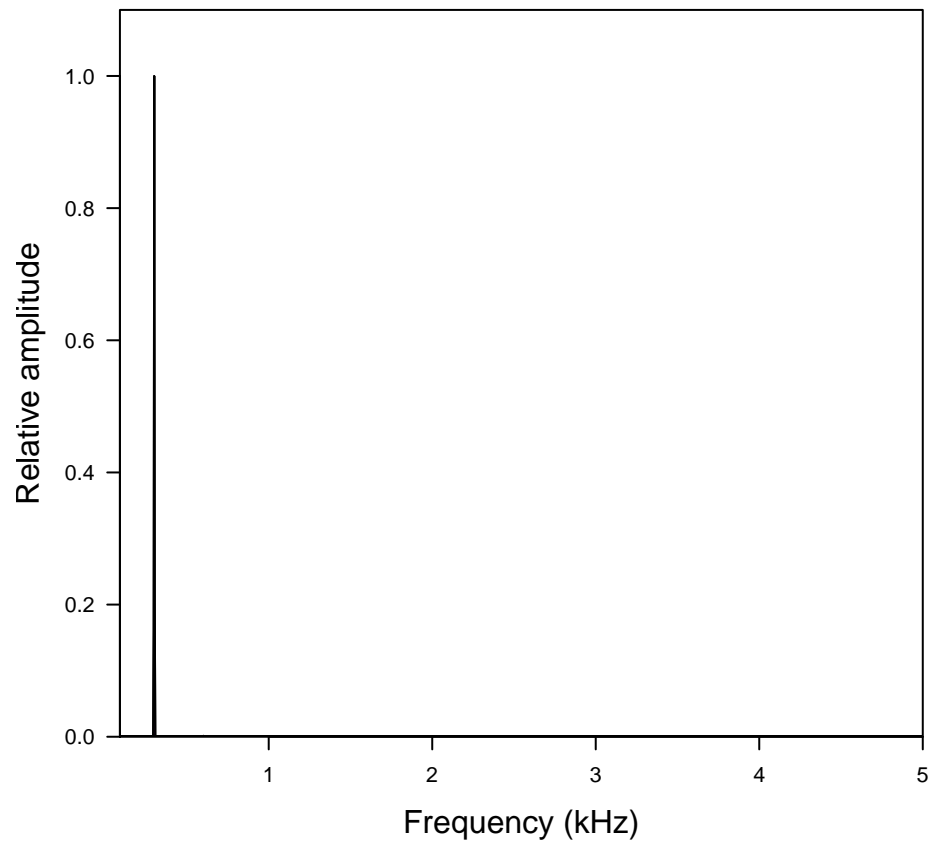

Vel. = 0.057 ; Str. = FA ; Axis = z ; Fl. accession = 10-s-77-3

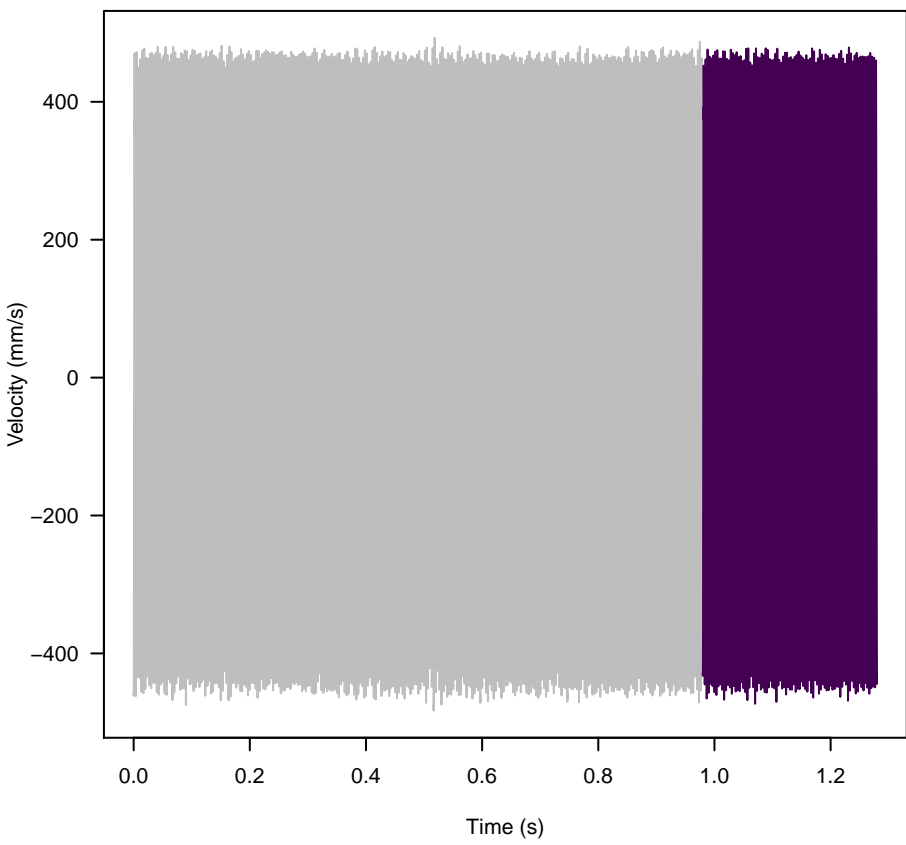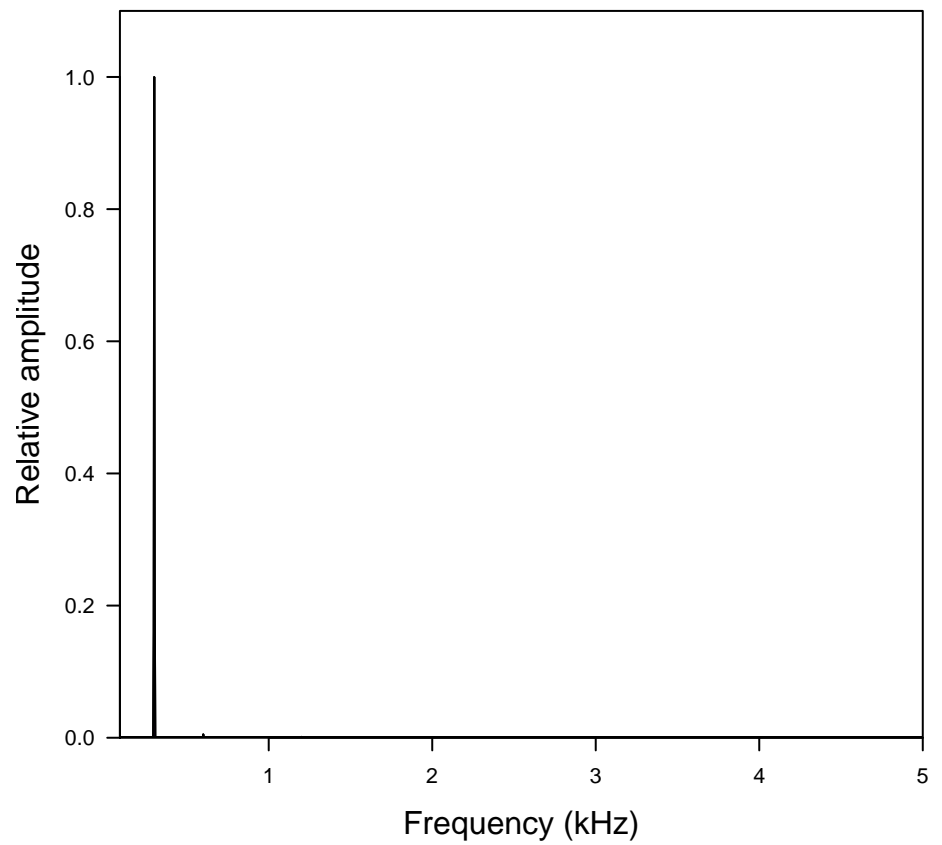

Vel. = 0.057 ; Str. = Receptacle ; Axis = z ; Fl. accession = 10-s-77-3

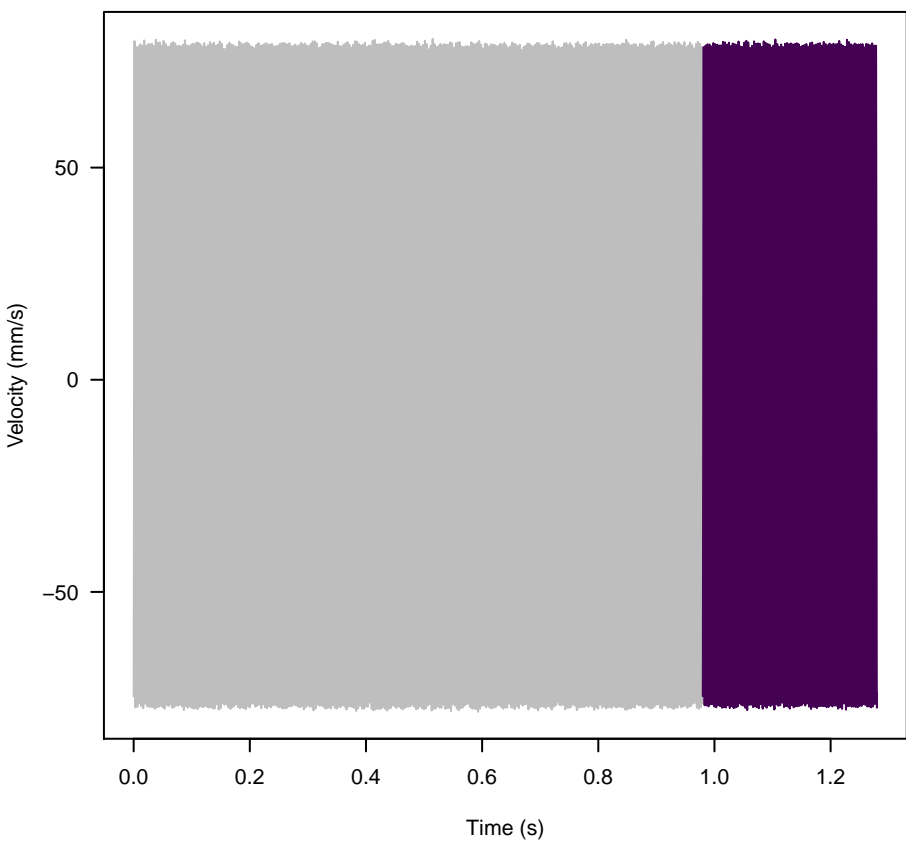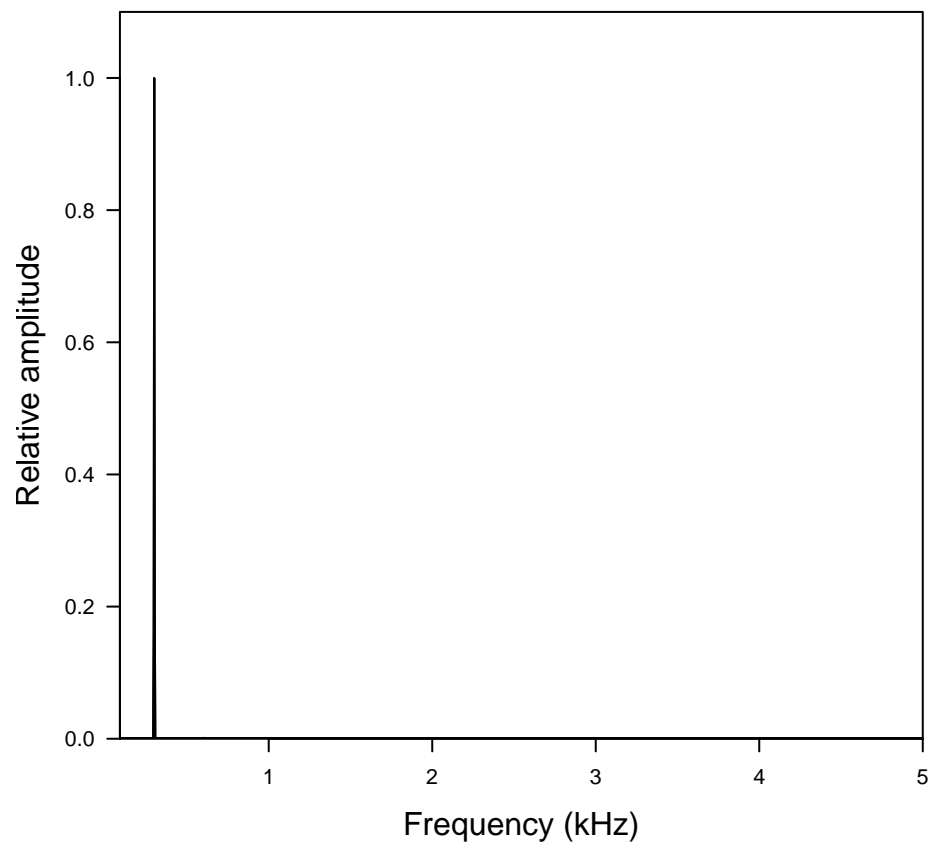

Vel. = 0.057 ; Str. = PA ; Axis = z ; Fl. accession = 10-s-77-3

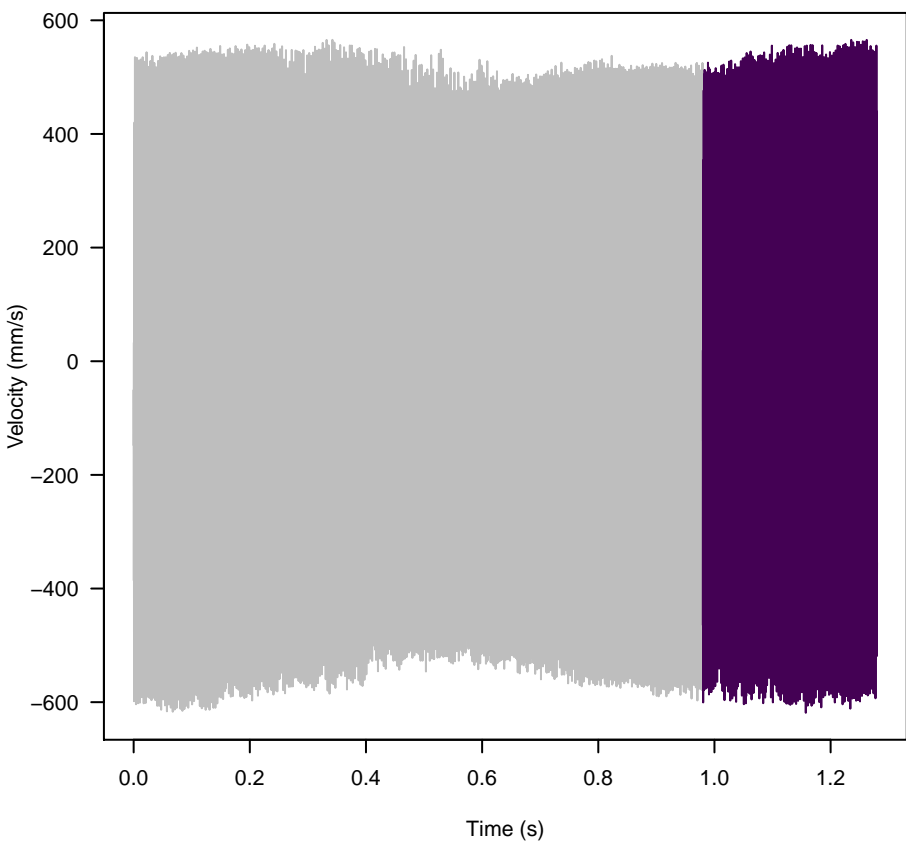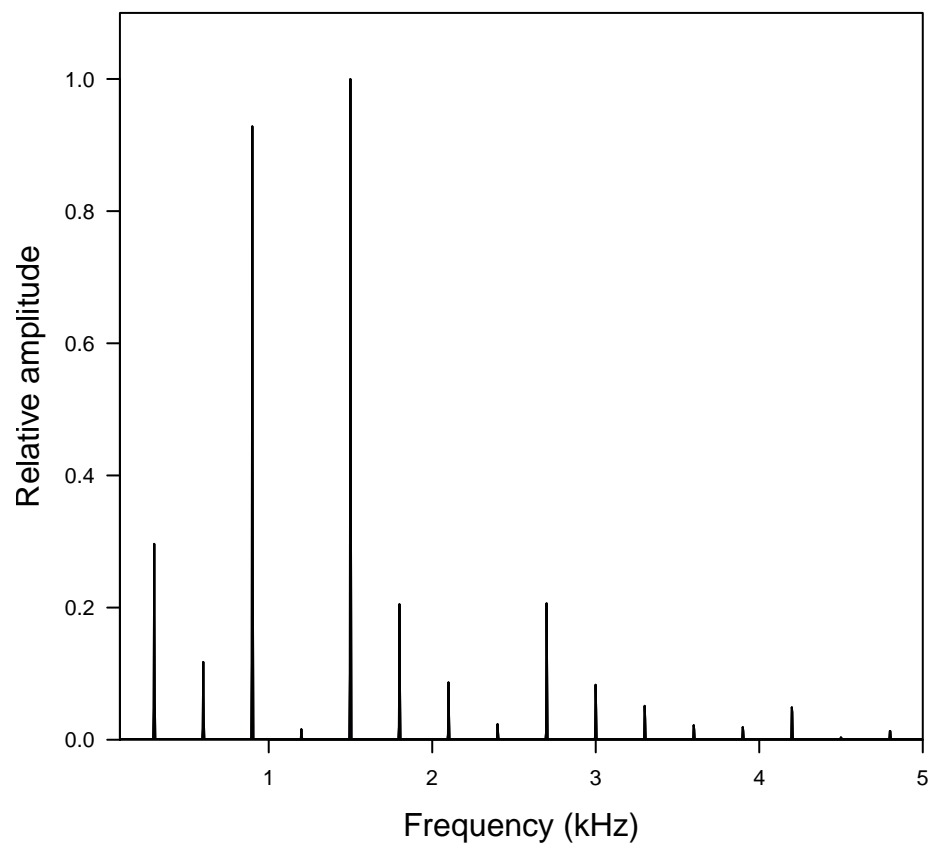

Vel. = 0.057 ; Str. = Receptacle ; Axis = z ; Fl. accession = 10-s-77-3

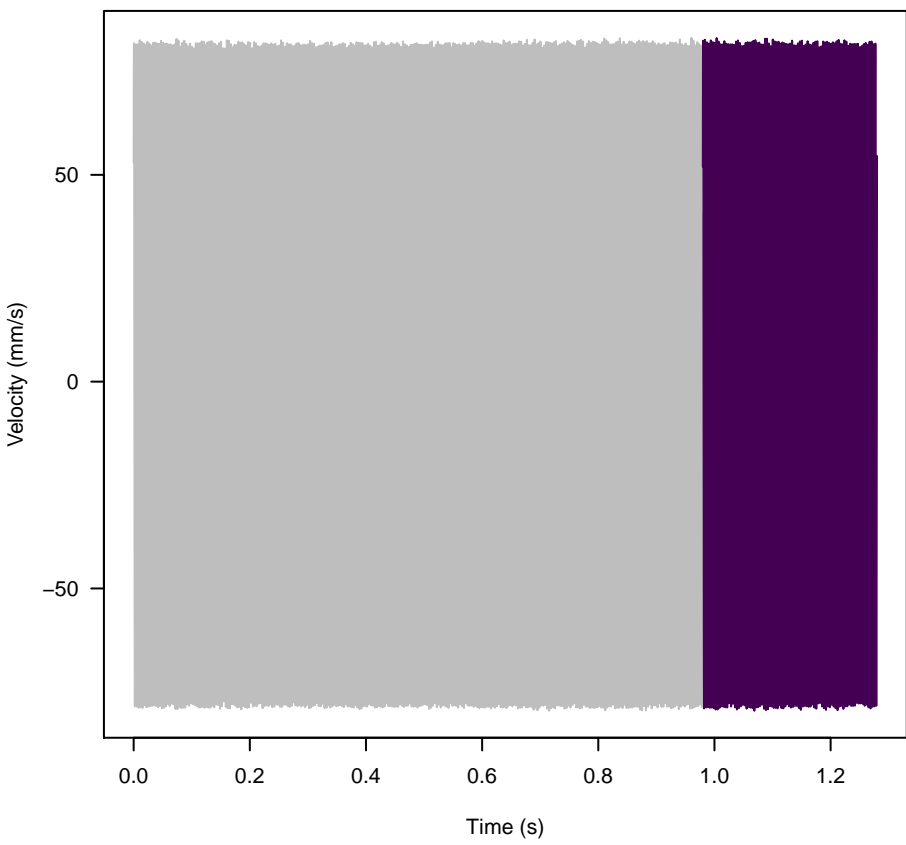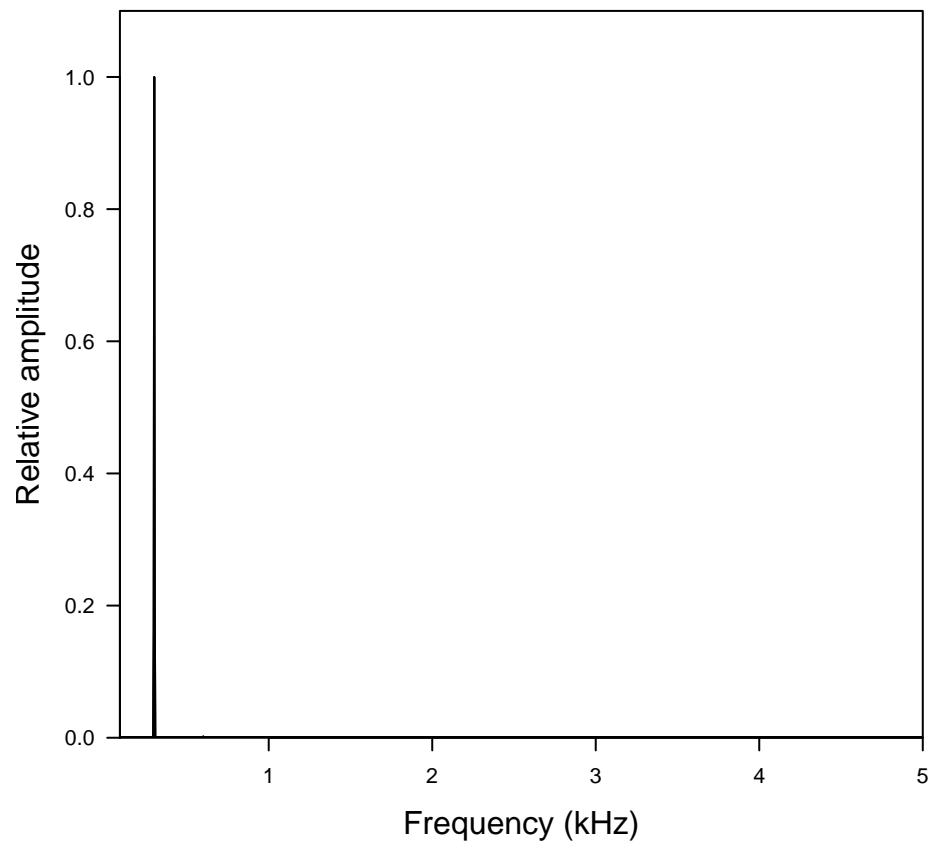

Vel. = 0.028 ; Str. = PA ; Axis = z ; Fl. accession = 10-s-77-3

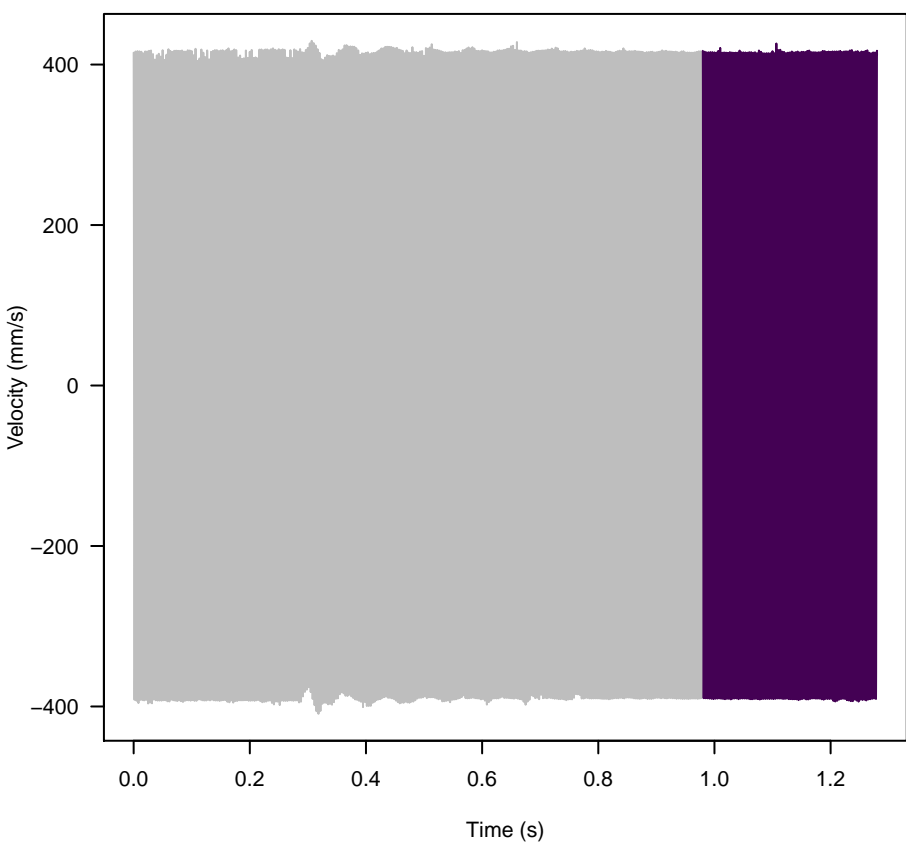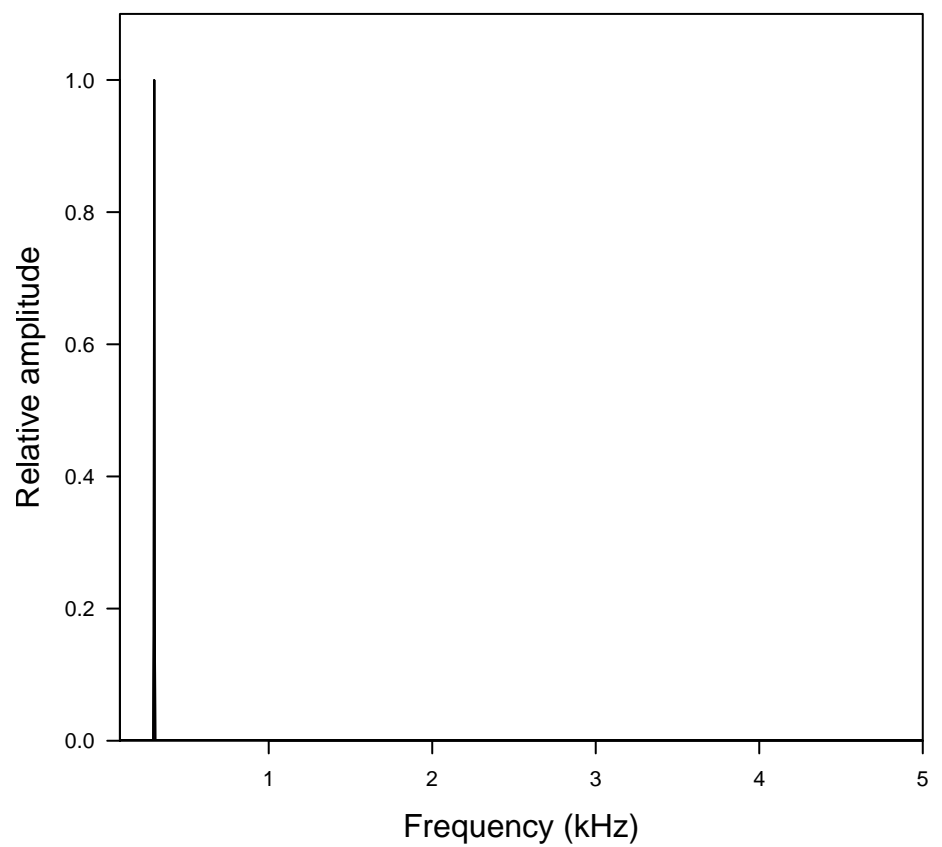

Vel. = 0.028 ; Str. = Receptacle ; Axis = z ; Fl. accession = 10-s-77-3

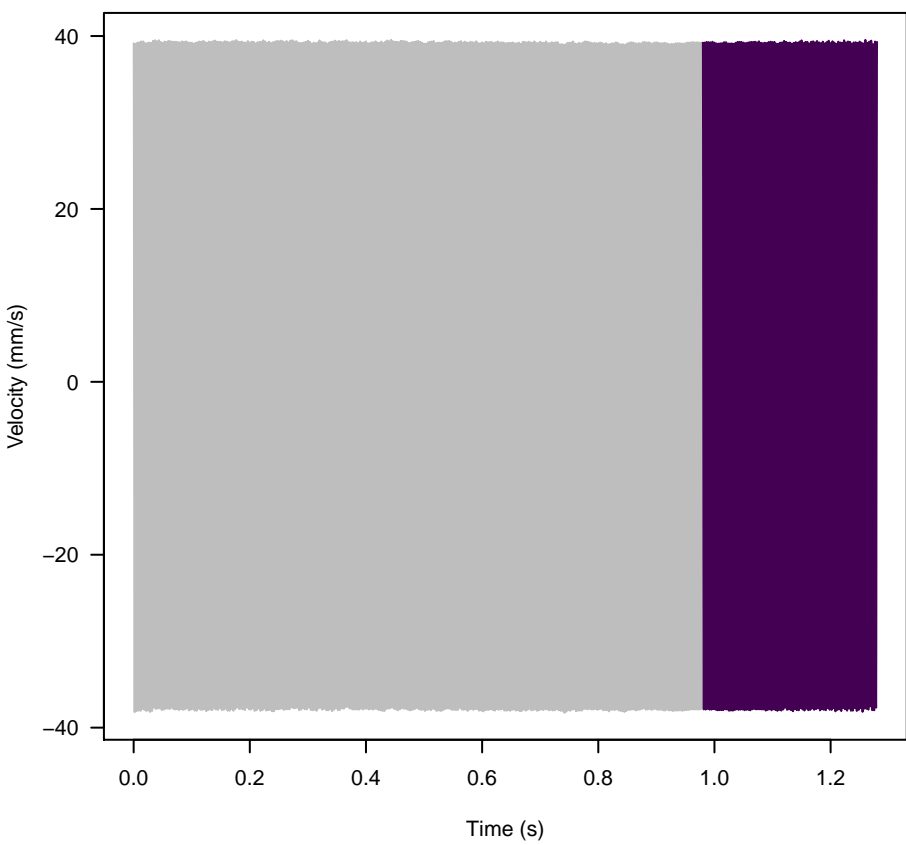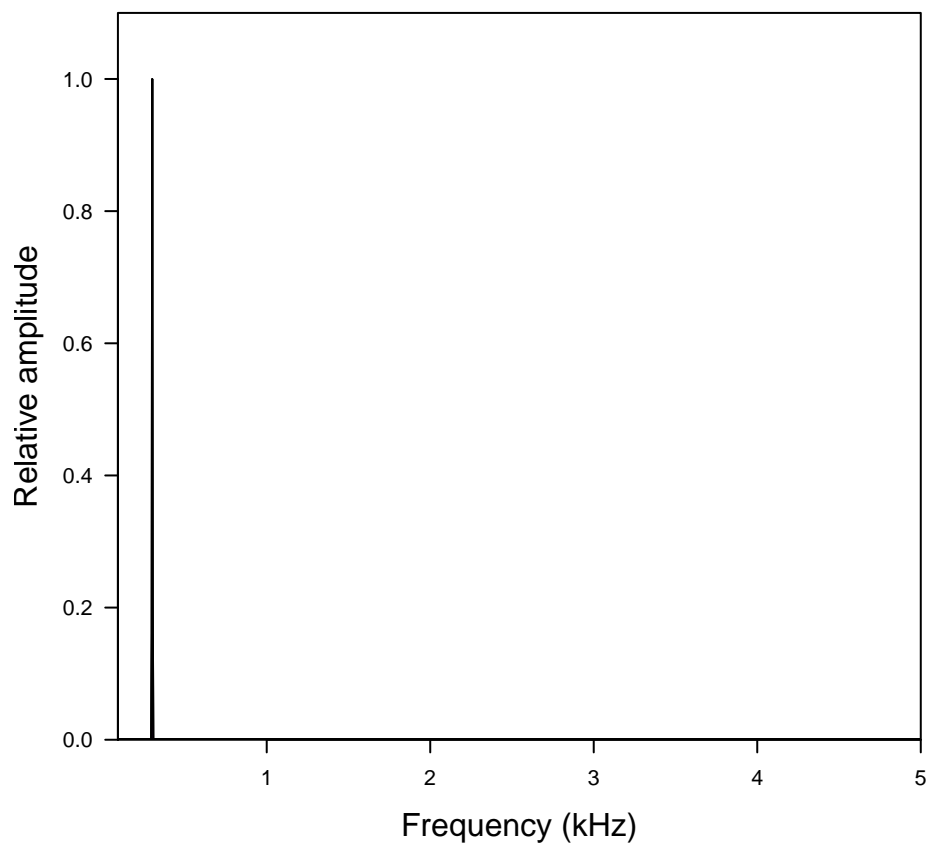

Vel. = 0.028 ; Str. = FA ; Axis = z ; Fl. accession = 10-s-77-3

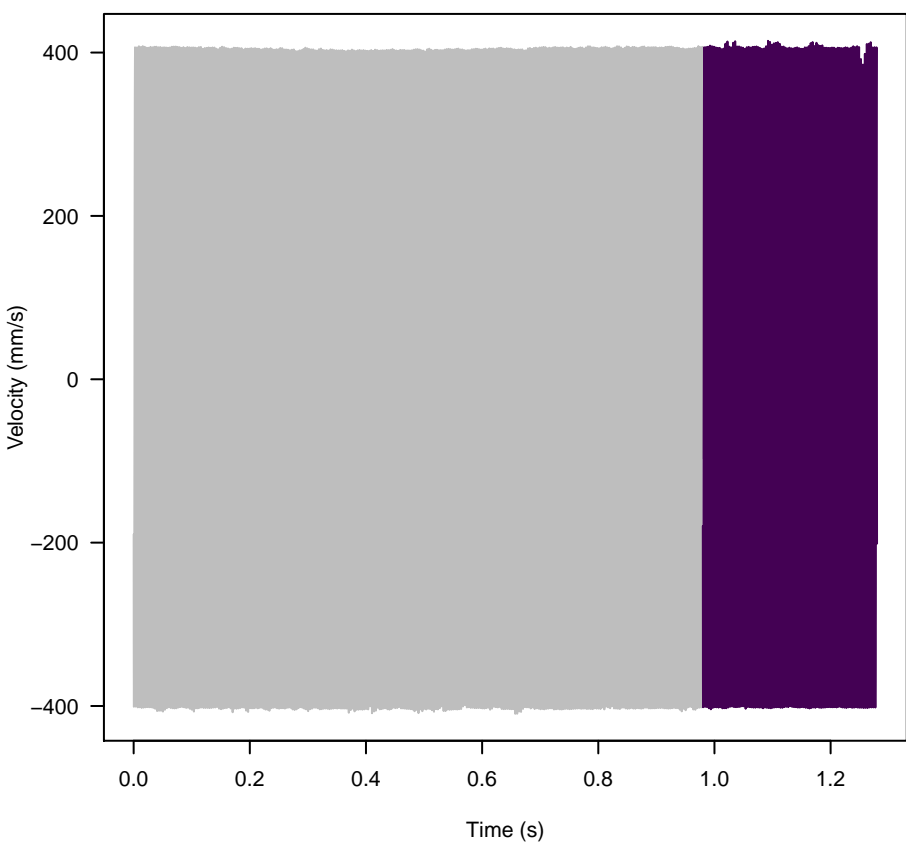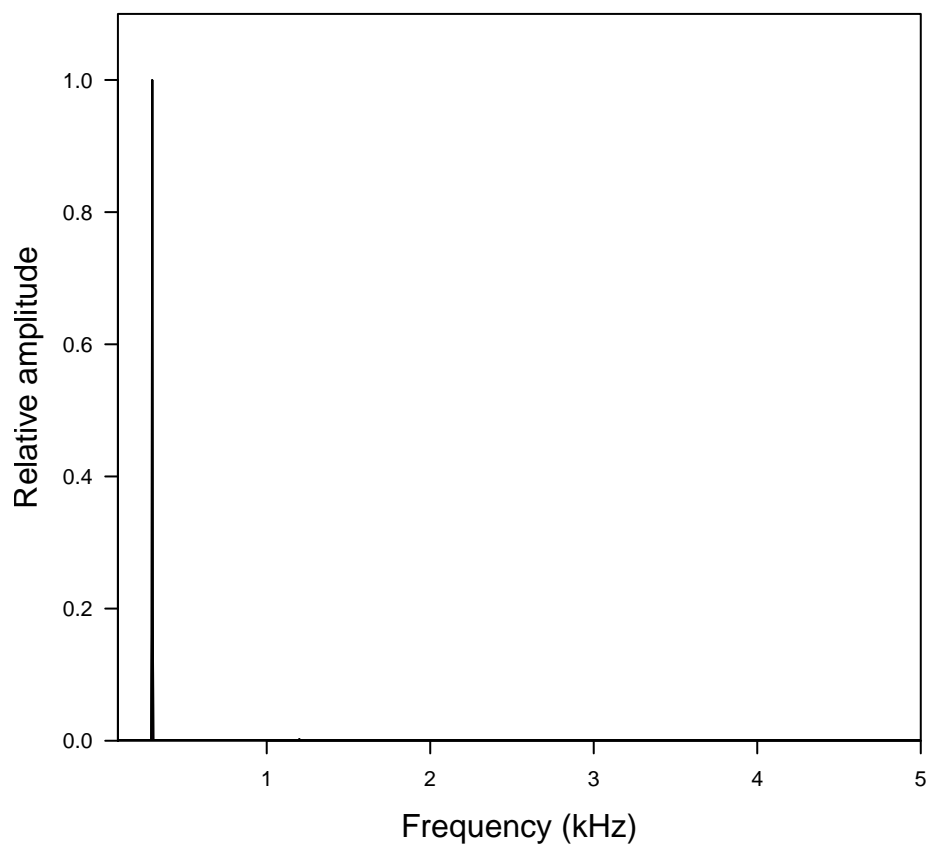

Vel. = 0.028 ; Str. = Receptacle ; Axis = z ; Fl. accession = 10-s-77-3

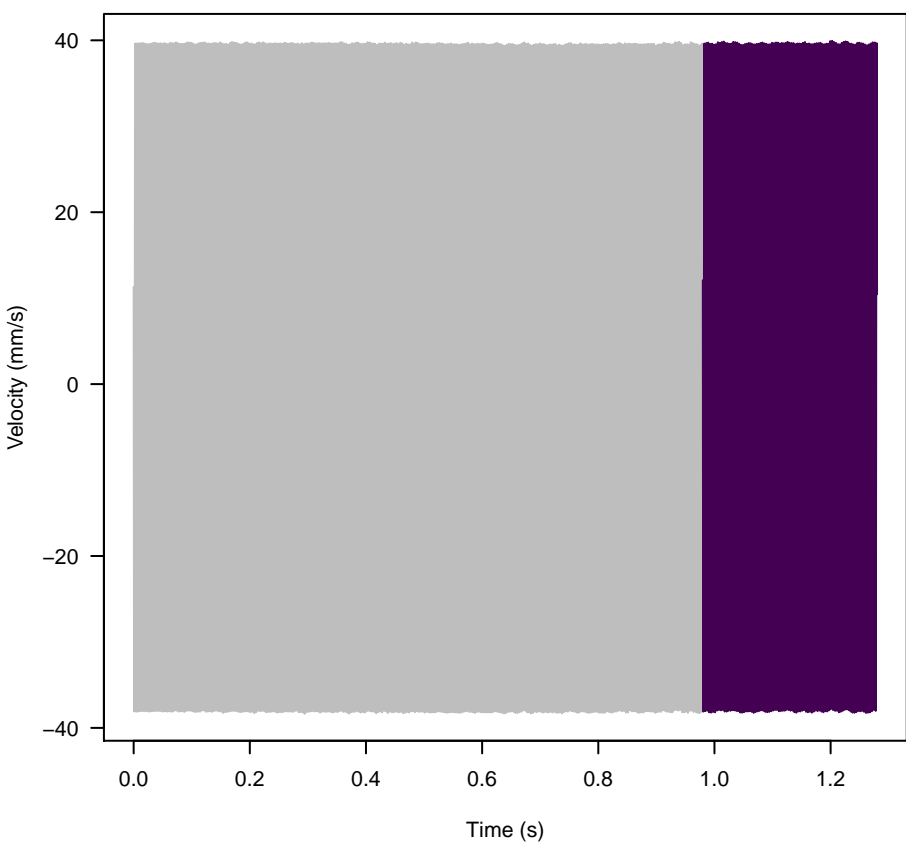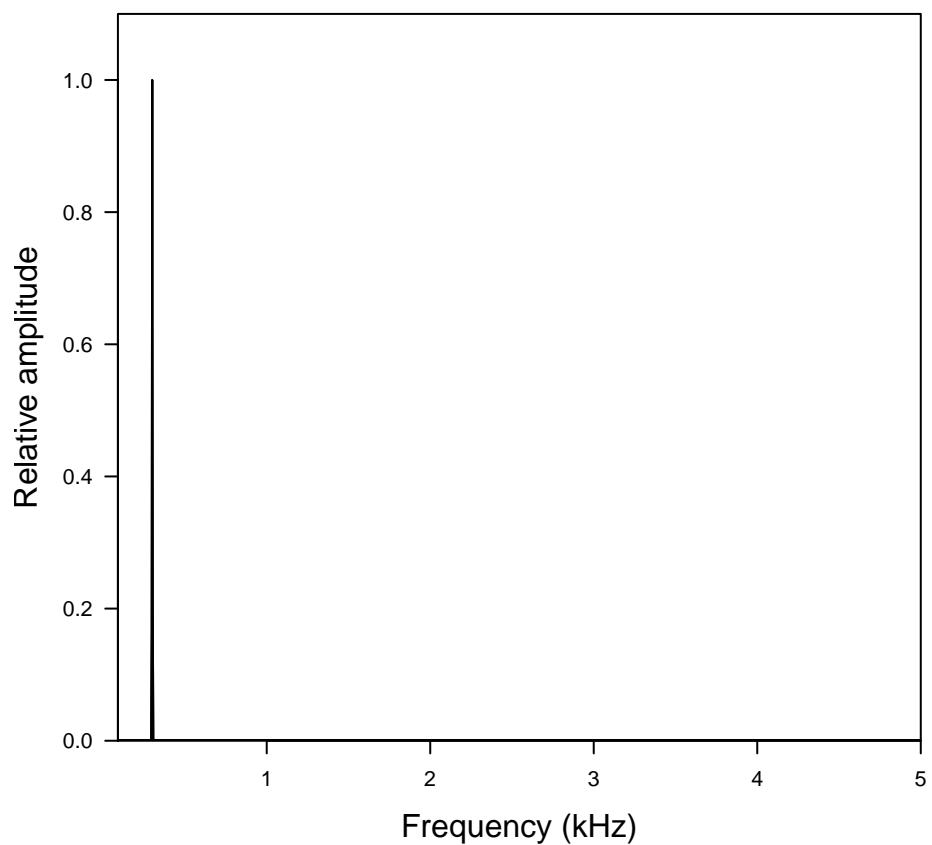

Vel. = 0.028 ; Str. = Corolla ; Axis = z ; Fl. accession = 10-s-77-3

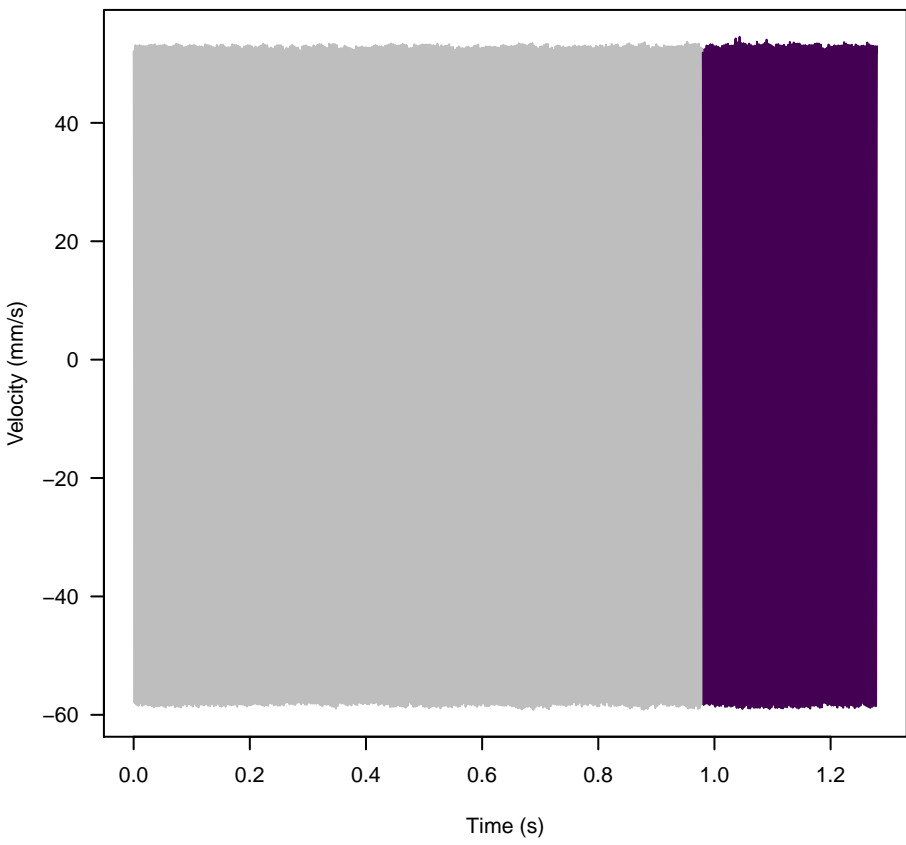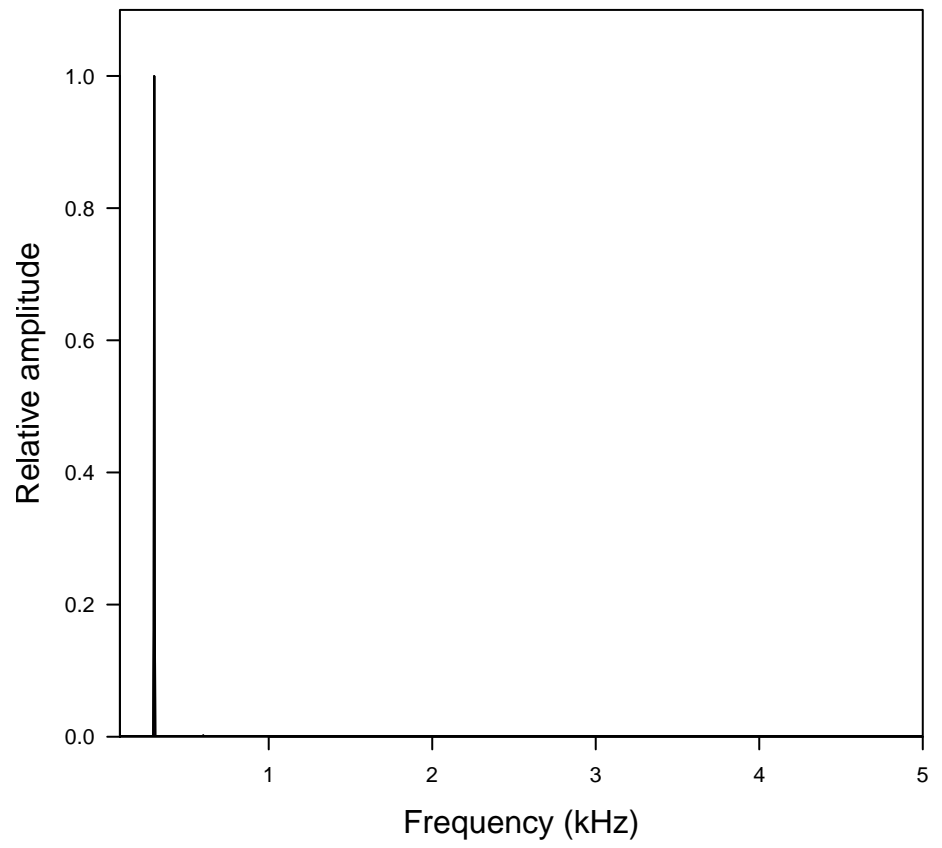

Vel. = 0.028 ; Str. = Receptacle ; Axis = z ; Fl. accession = 10-s-77-3

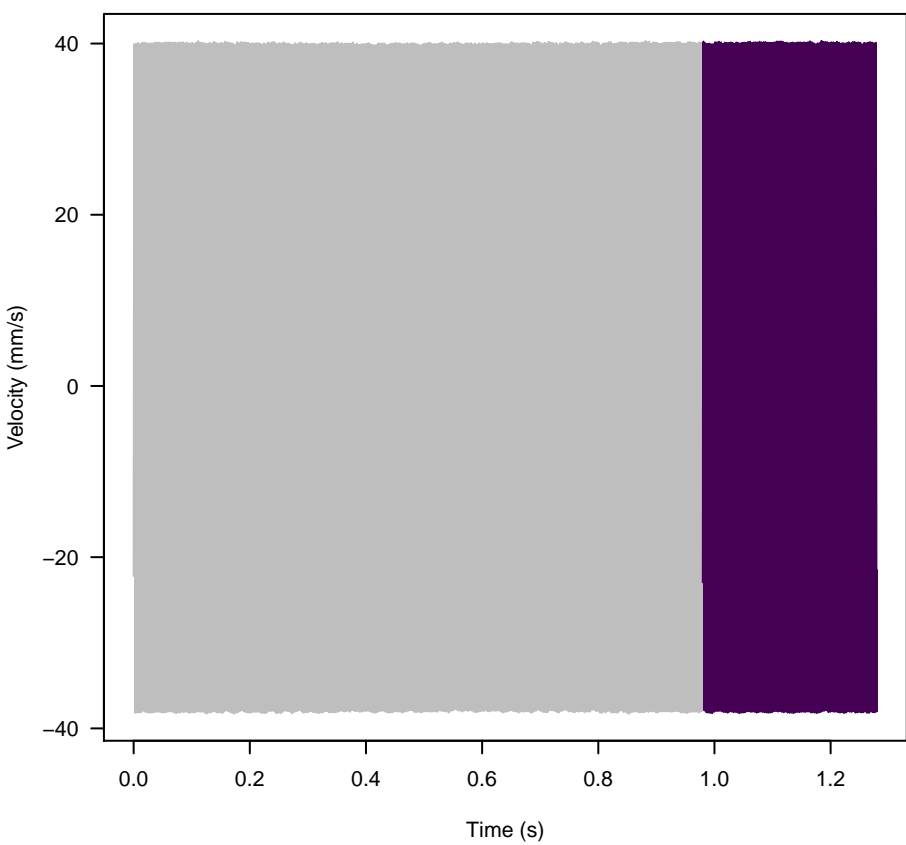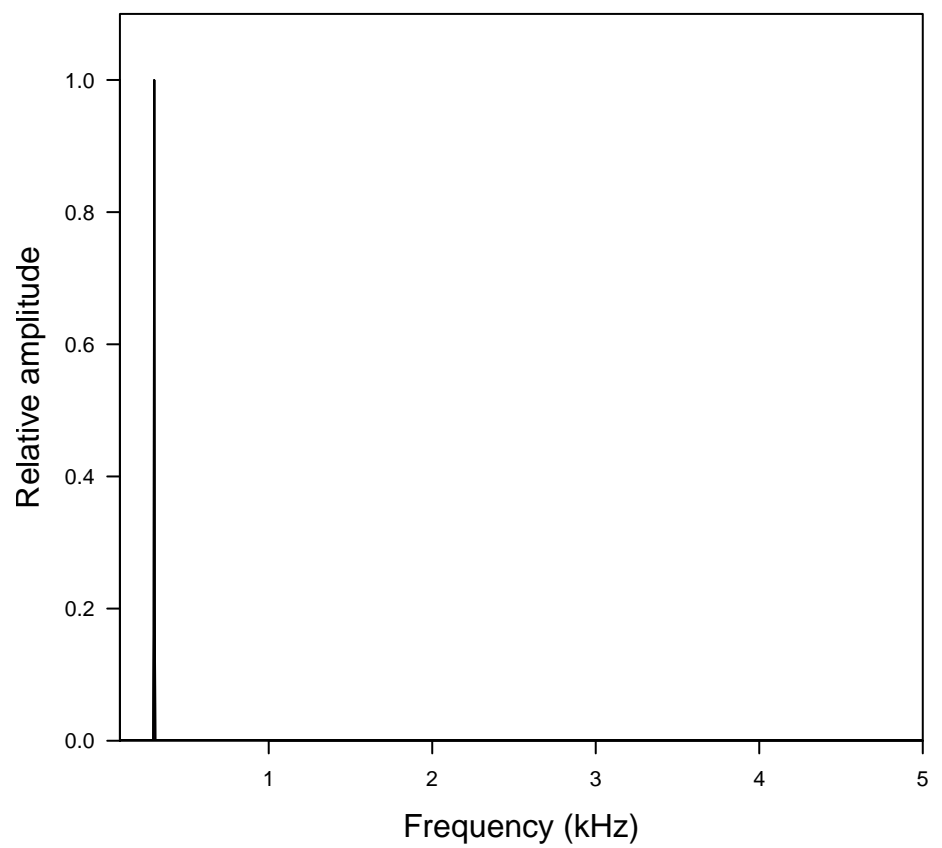

Vel. = 0.014 ; Str. = Corolla ; Axis = z ; Fl. accession = 10-s-77-3

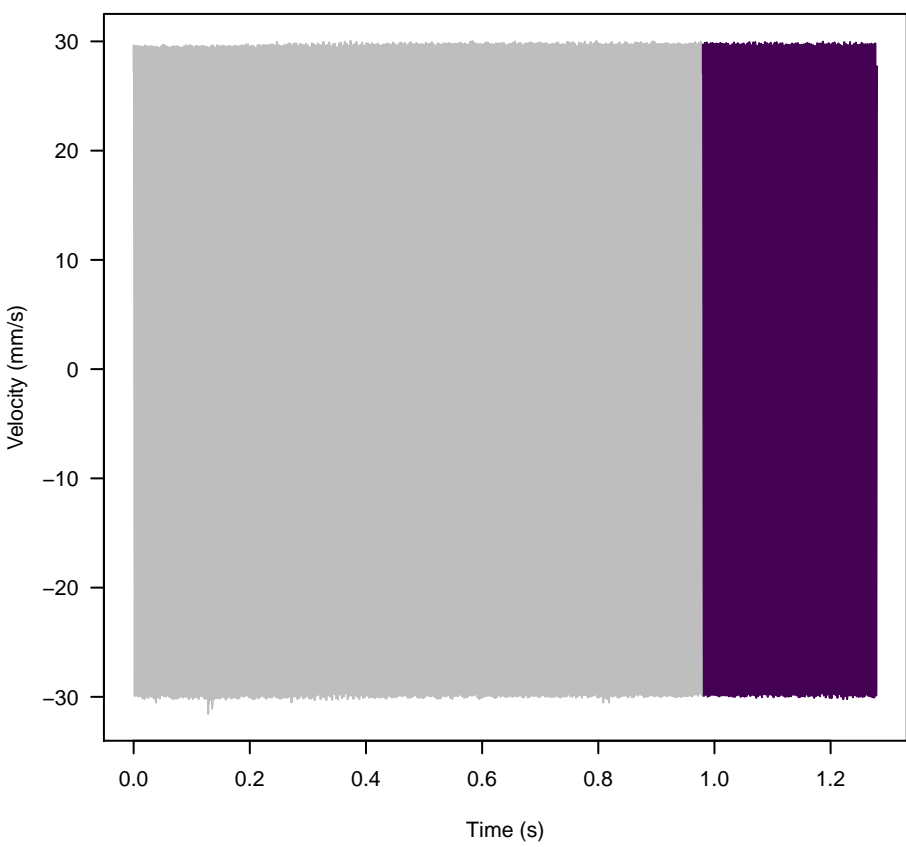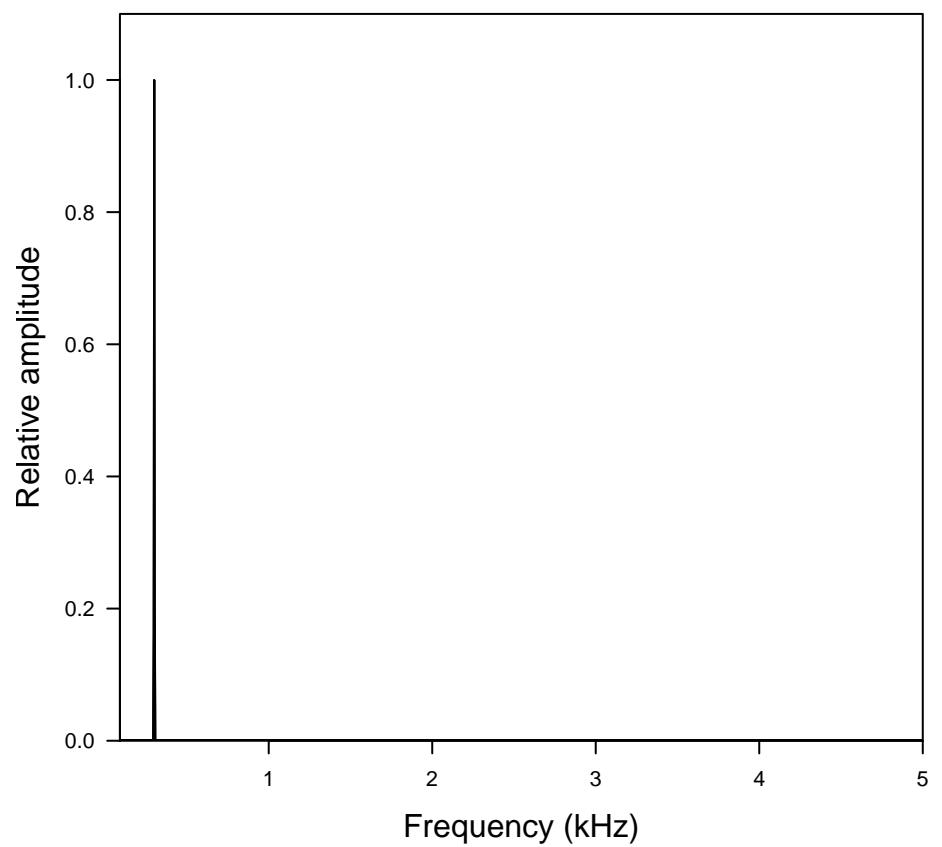



Vel. = 0.014 ; Str. = Receptacle ; Axis = z ; Fl. accession = 10-s-77-3

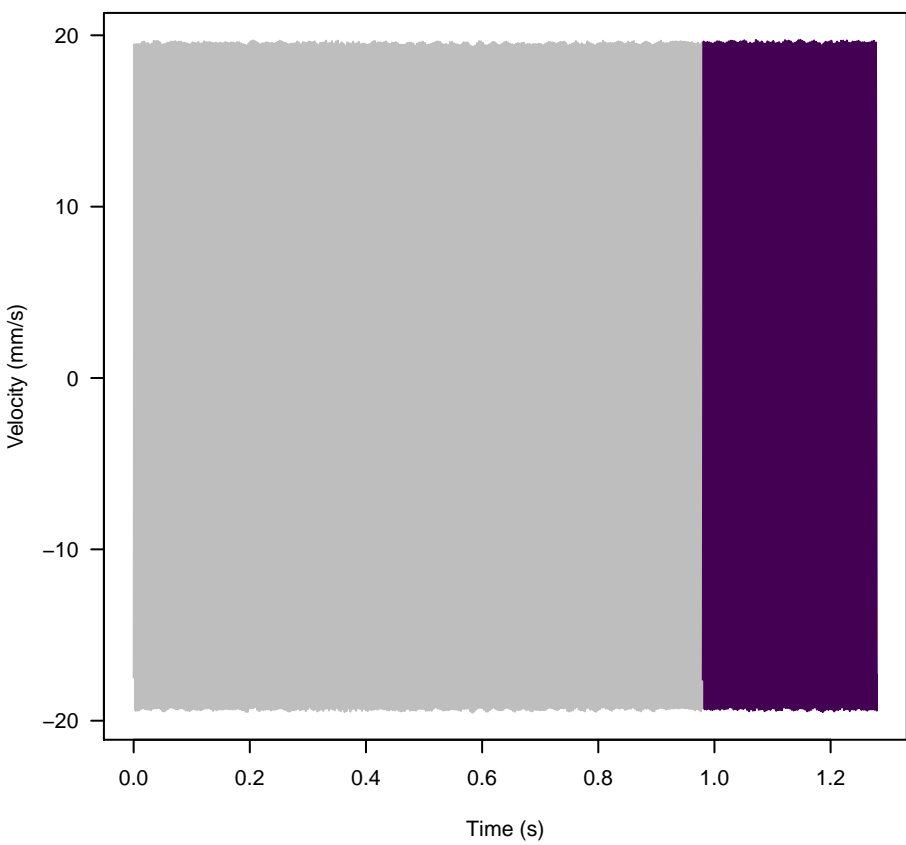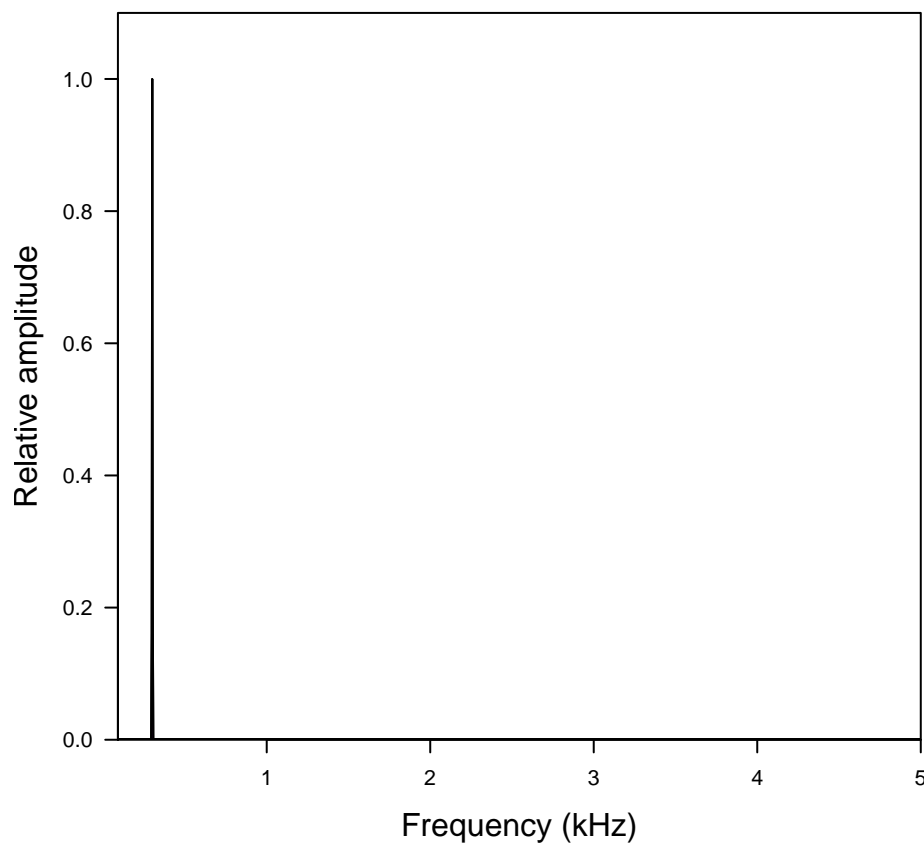

Vel. = 0.014 ; Str. = FA ; Axis = z ; Fl. accession = 10-s-77-3

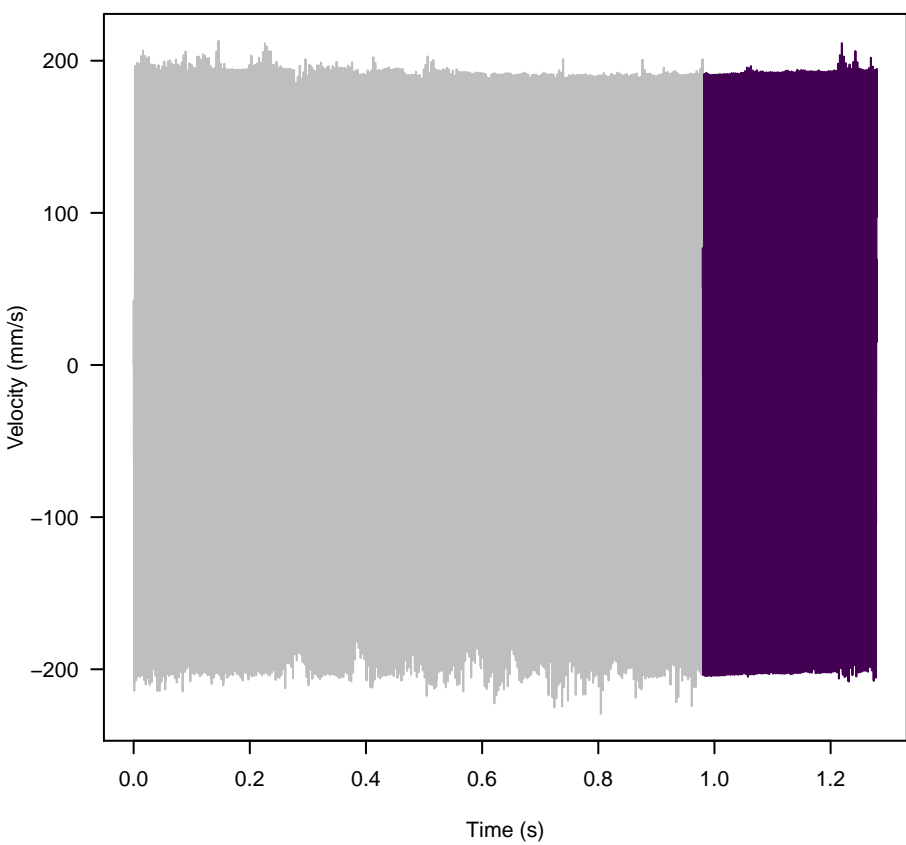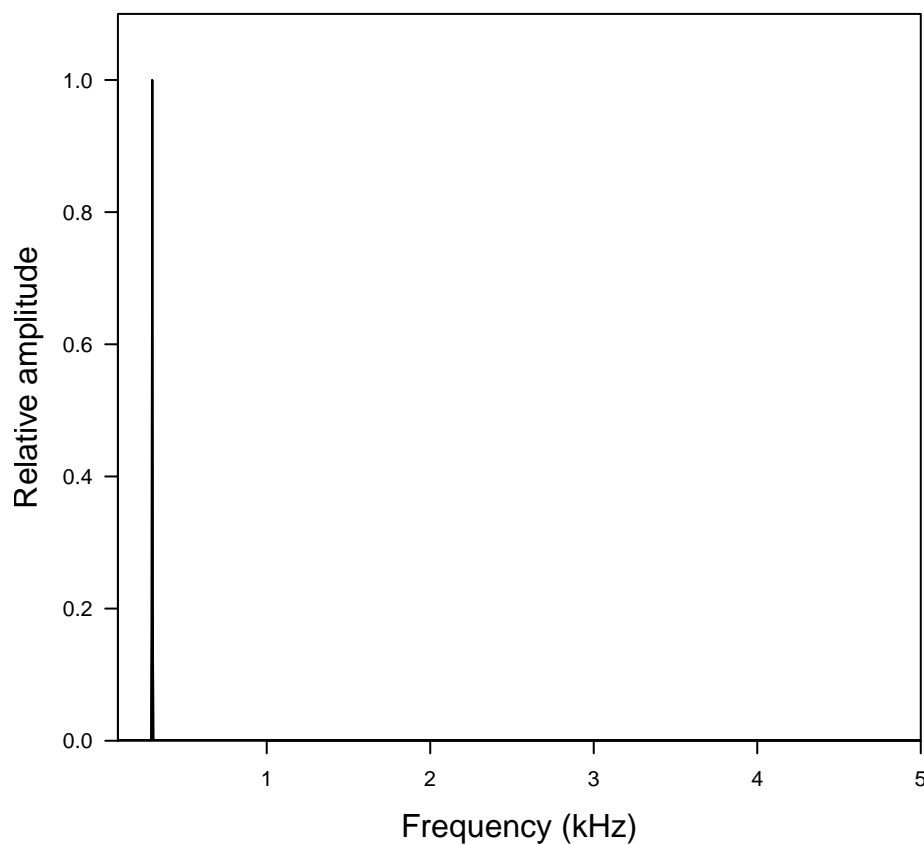

Vel. = 0.014 ; Str. = Receptacle ; Axis = z ; Fl. accession = 10-s-77-3

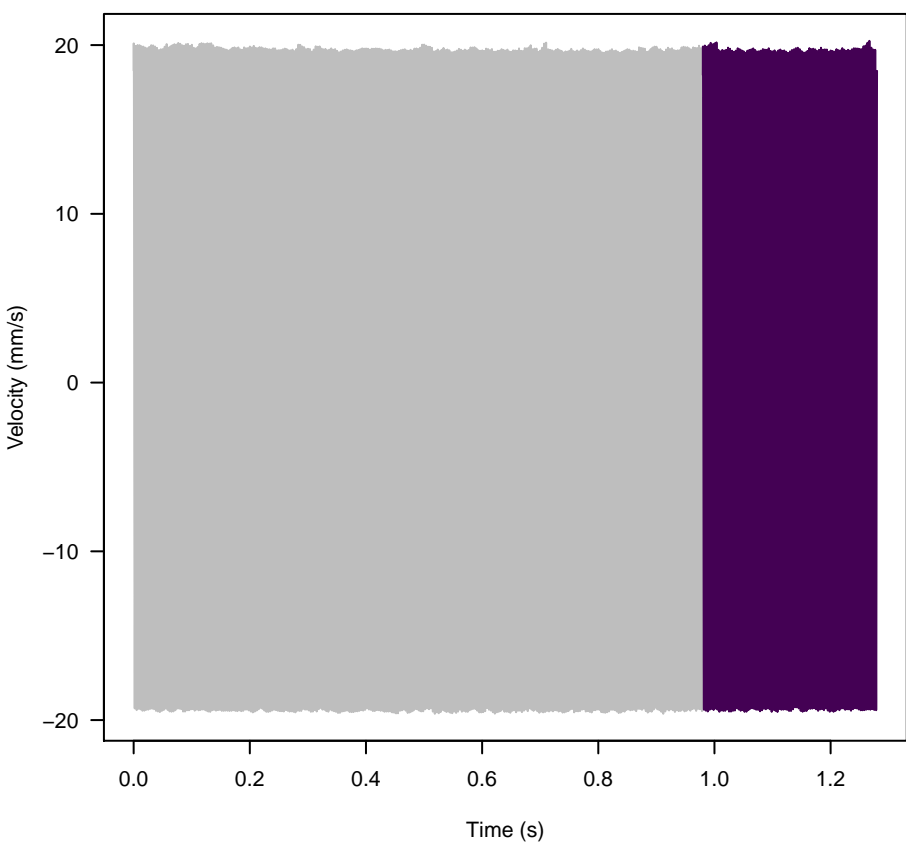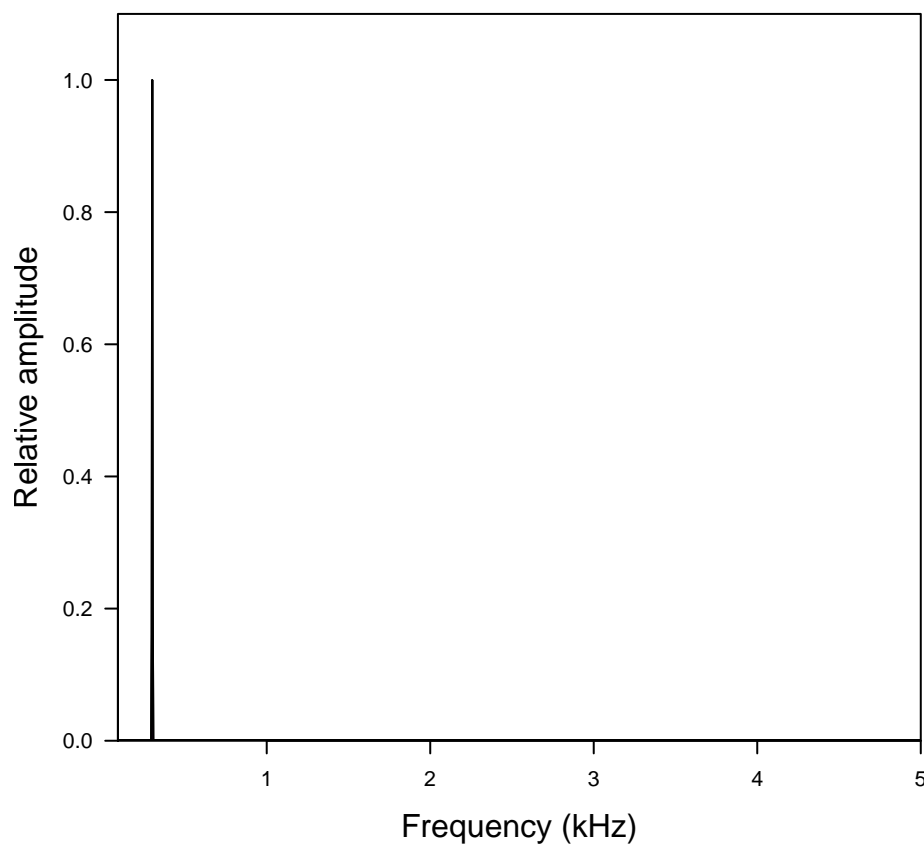

Vel. = 0.014 ; Str. = PA ; Axis = z ; Fl. accession = 10-s-77-3

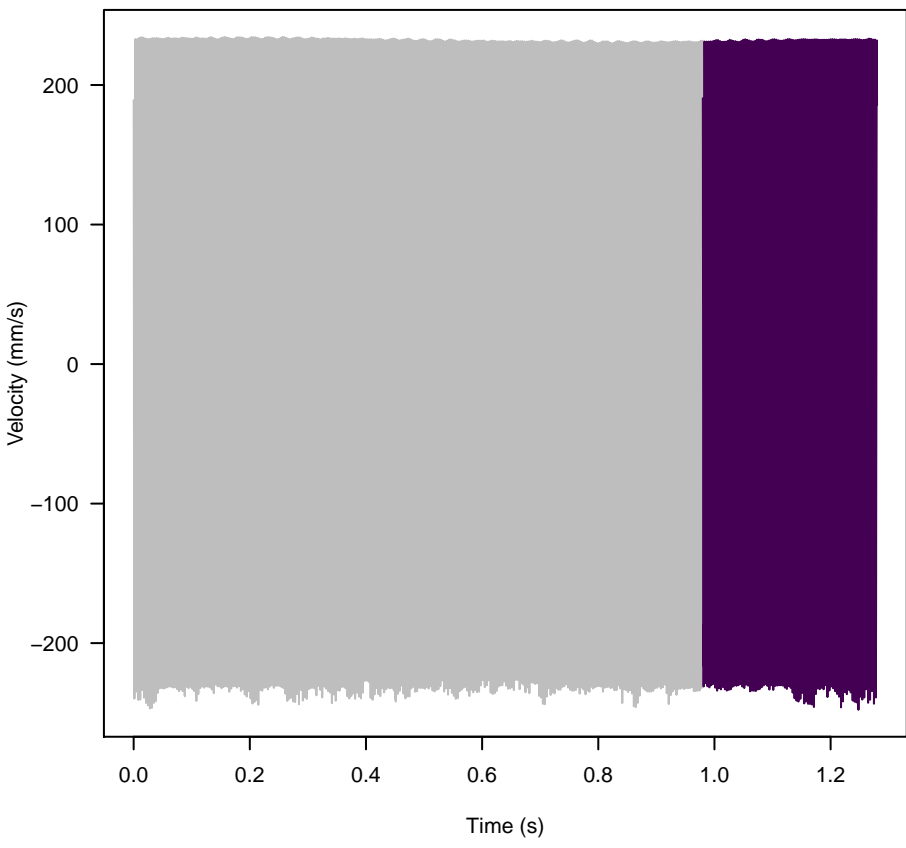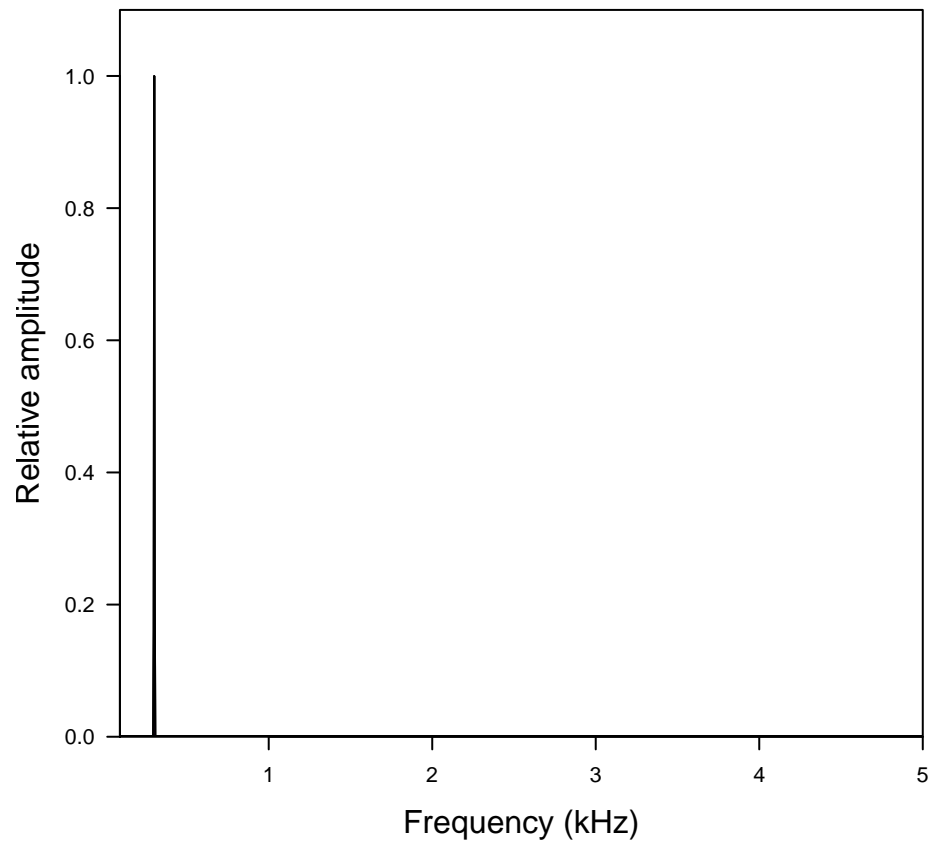

Vel. = 0.014 ; Str. = Receptacle ; Axis = z ; Fl. accession = 10-s-77-3

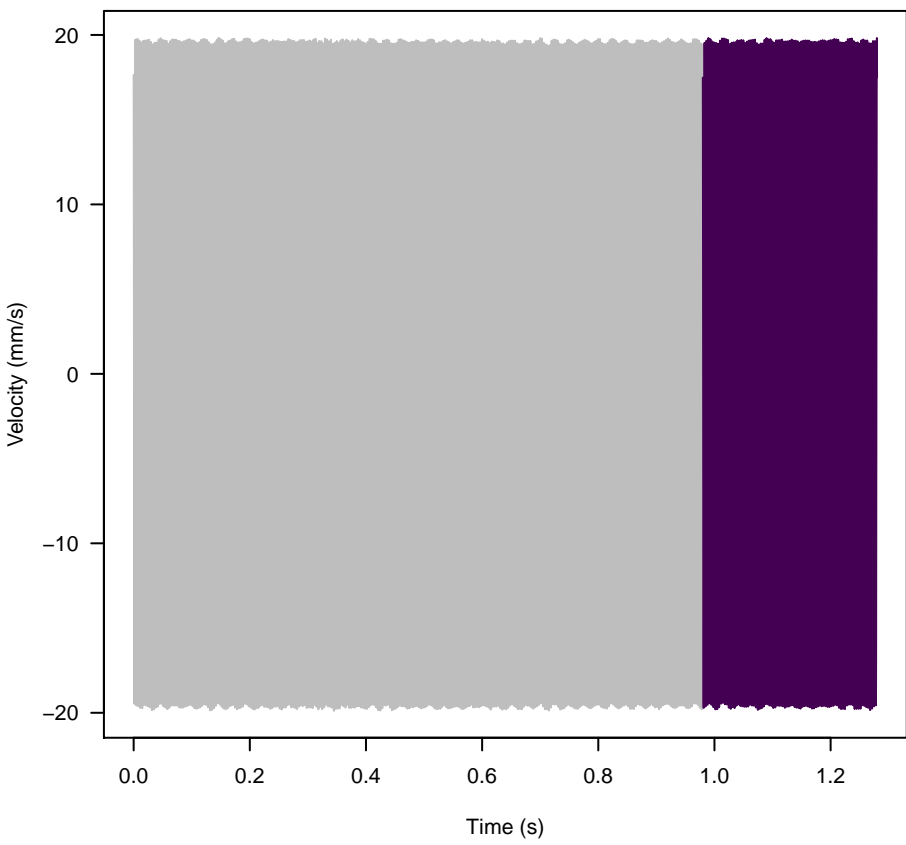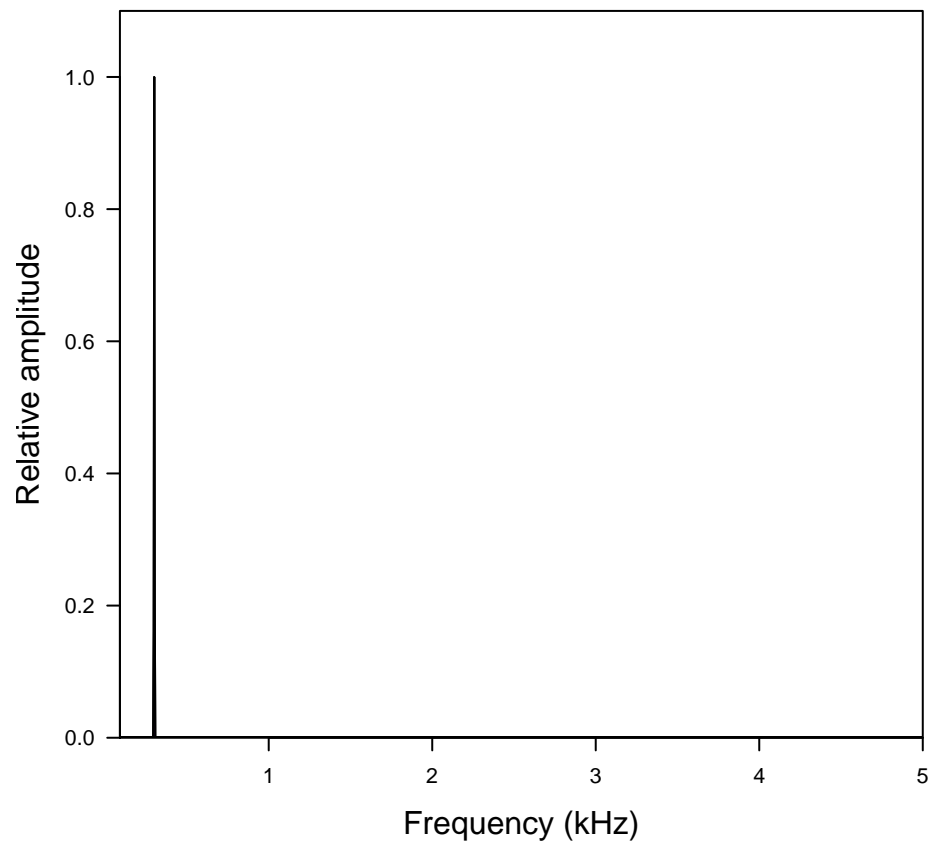

Vel. = 0.014 ; Str. = Corolla ; Axis = x ; Fl. accession = 10-s-77-3

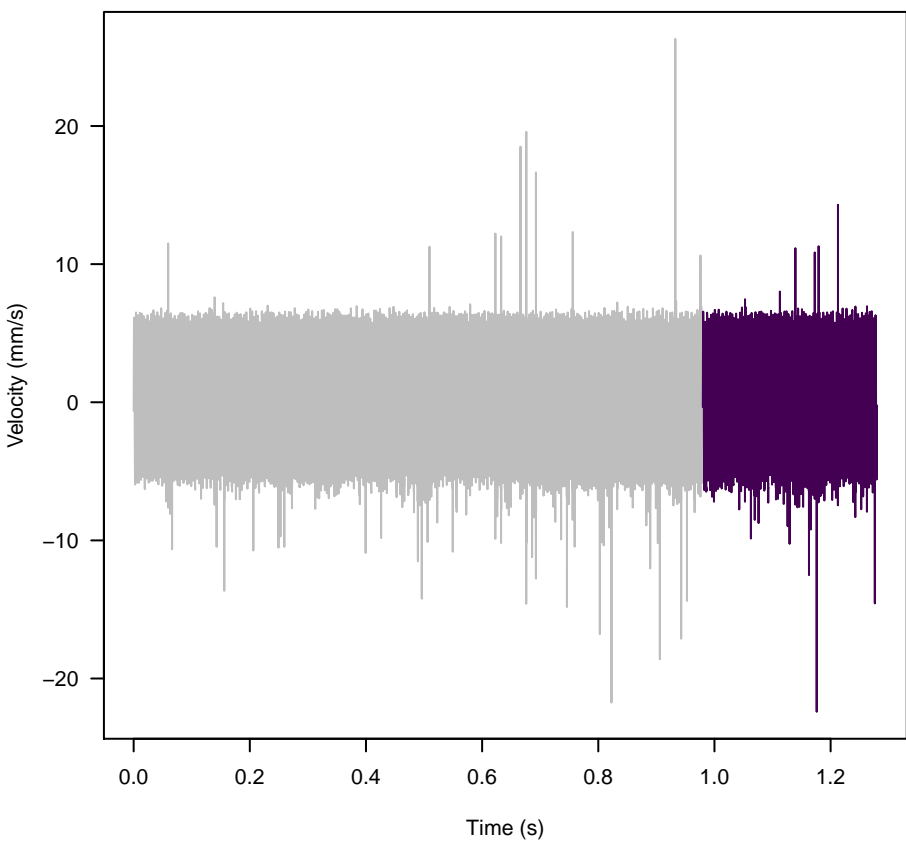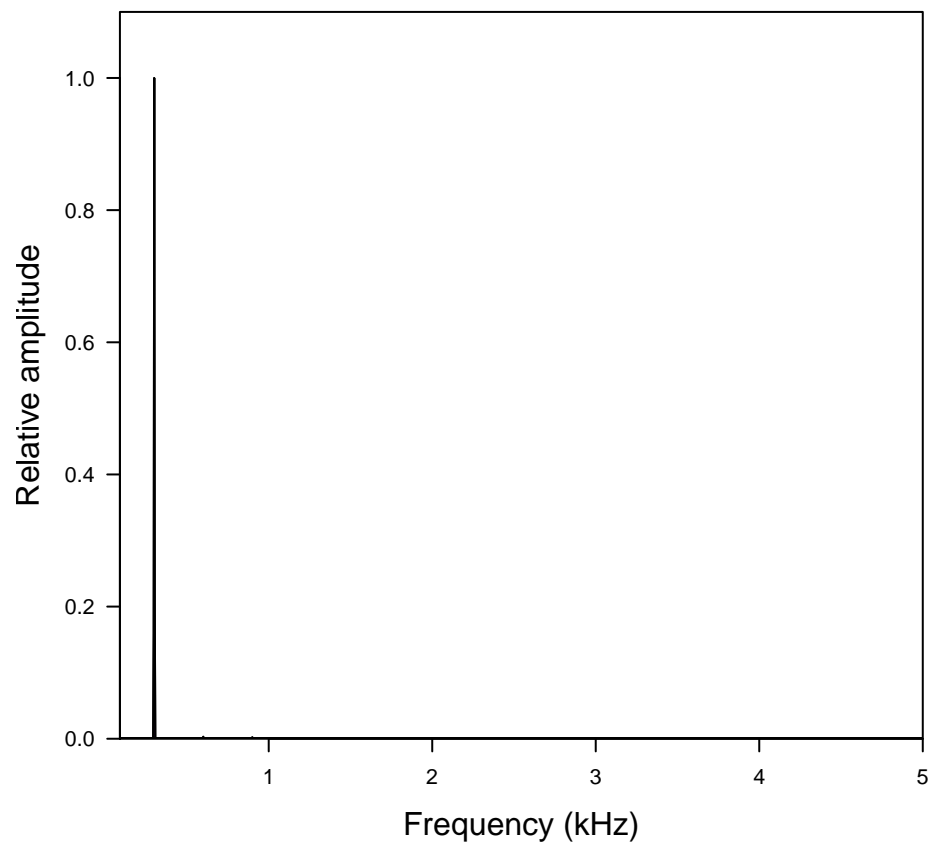

Vel. = 0.014 ; Str. = Receptacle ; Axis = x ; Fl. accession = 10-s-77-3

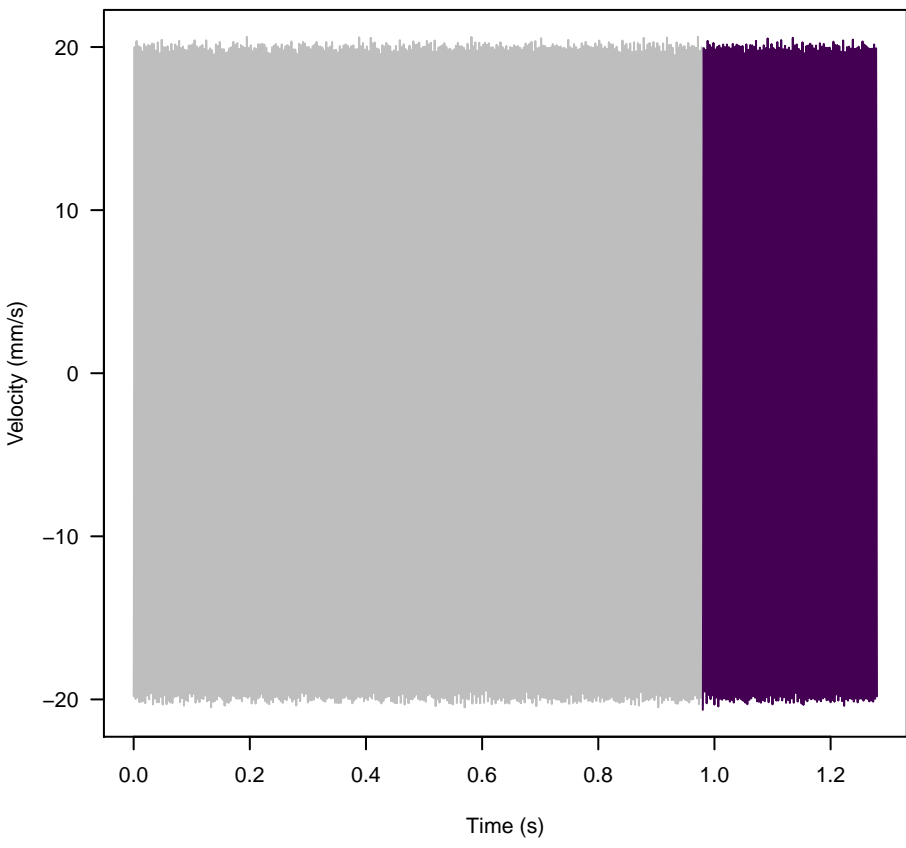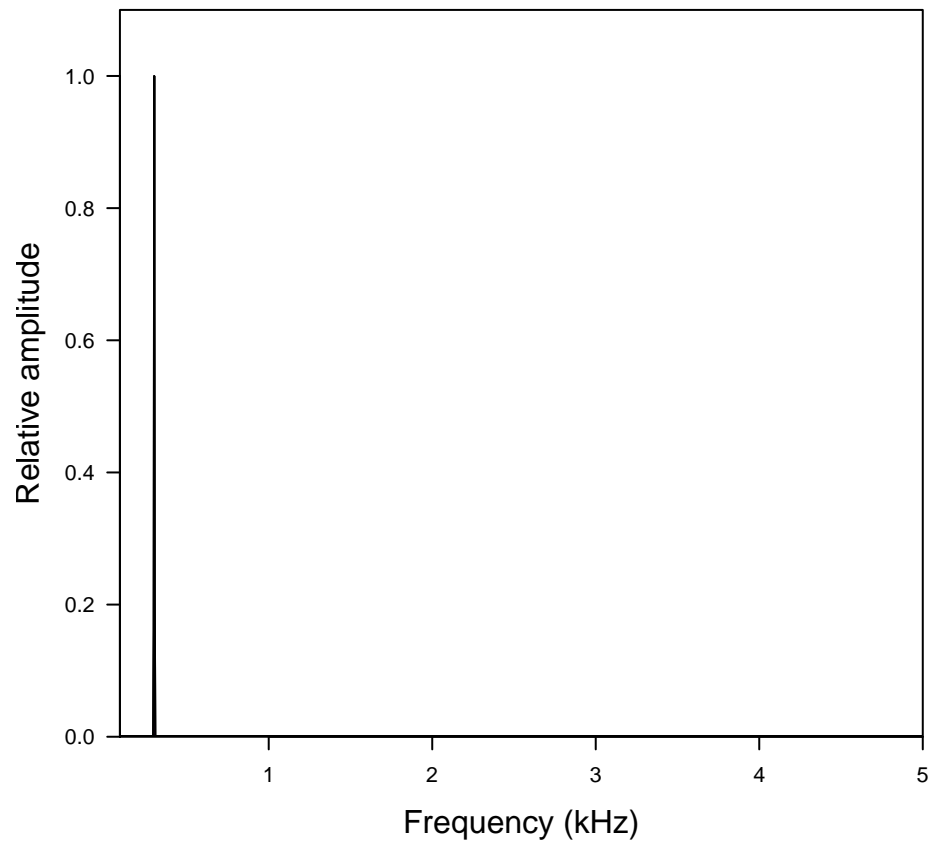

Vel. = 0.014 ; Str. = FA ; Axis = x ; Fl. accession = 10-s-77-3

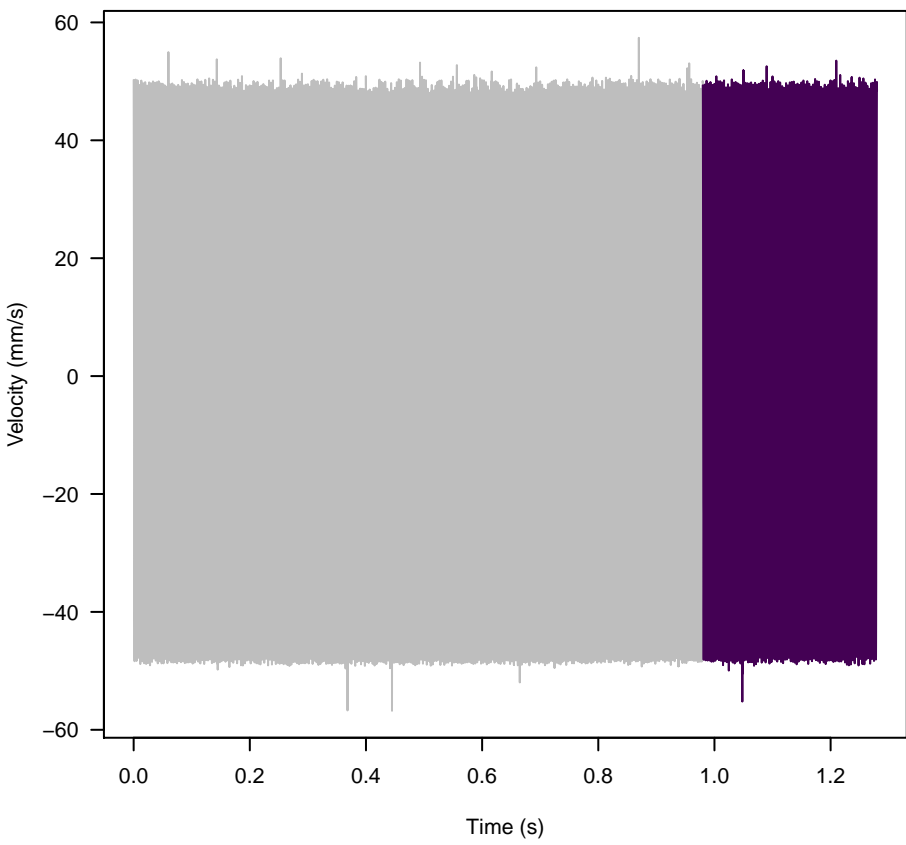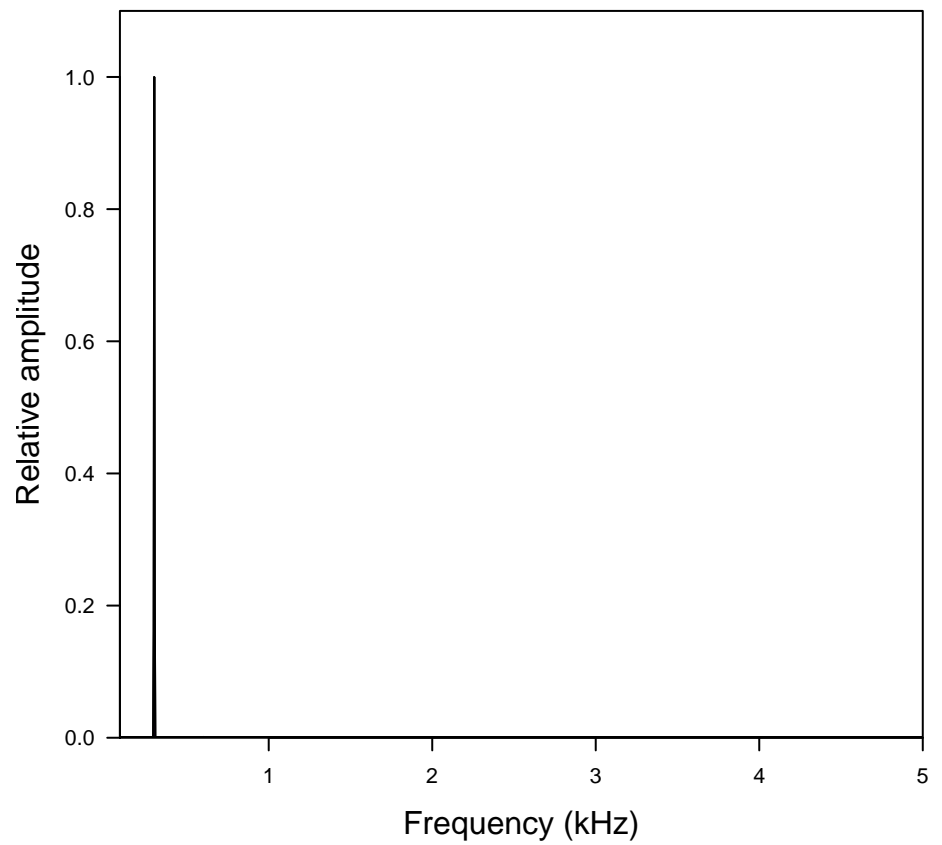

Vel. = 0.014 ; Str. = Receptacle ; Axis = x ; Fl. accession = 10-s-77-3

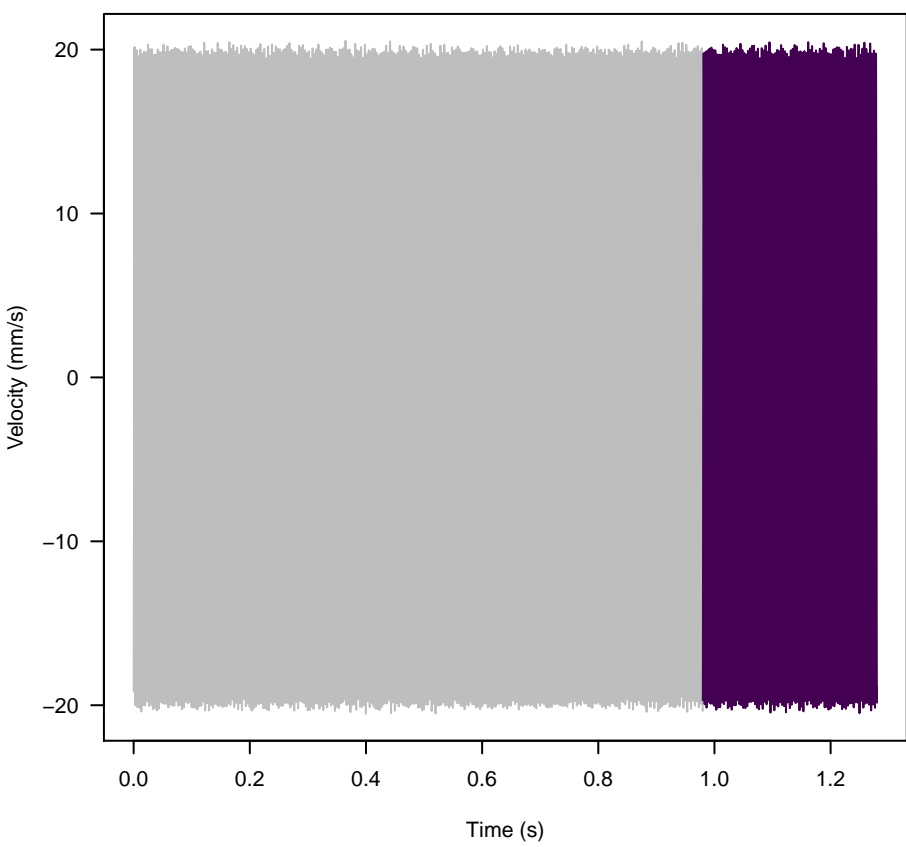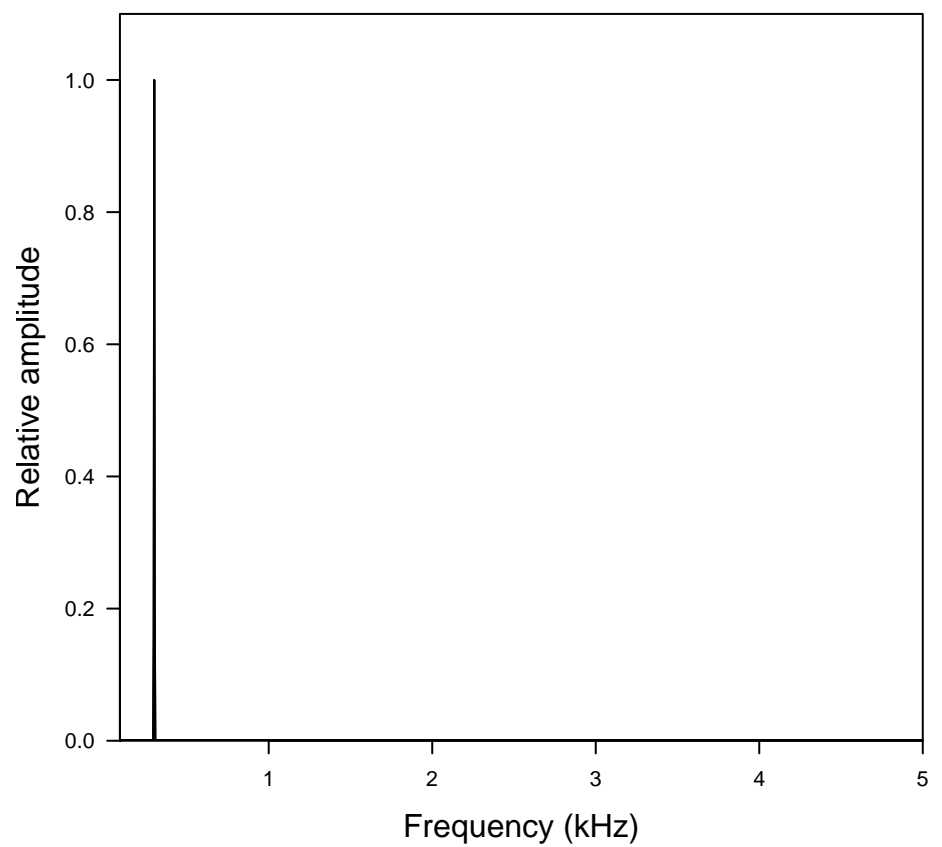

Vel. = 0.014 ; Str. = PA ; Axis = x ; Fl. accession = 10-s-77-3

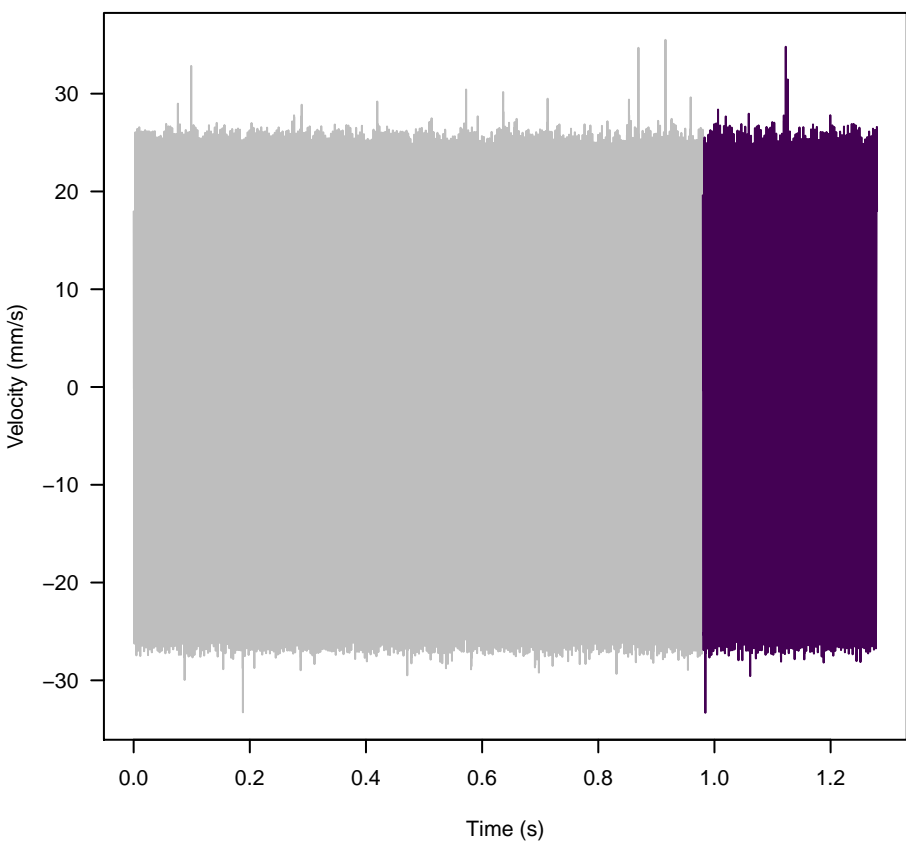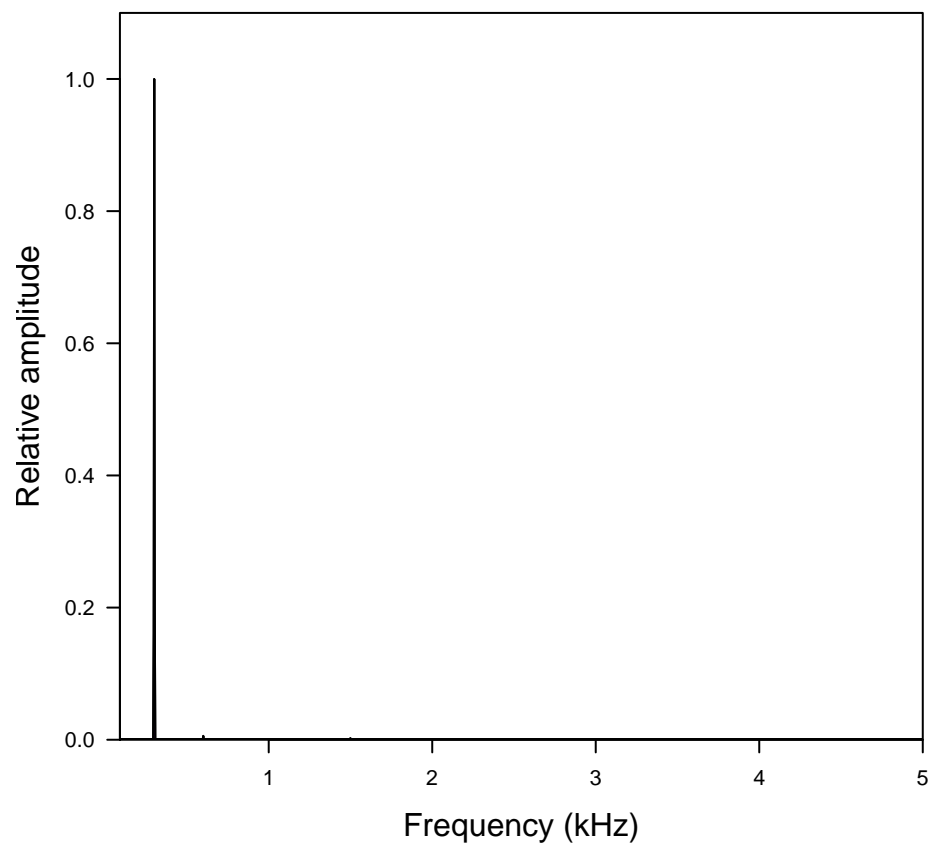

Vel. = 0.014 ; Str. = Receptacle ; Axis = x ; Fl. accession = 10-s-77-3

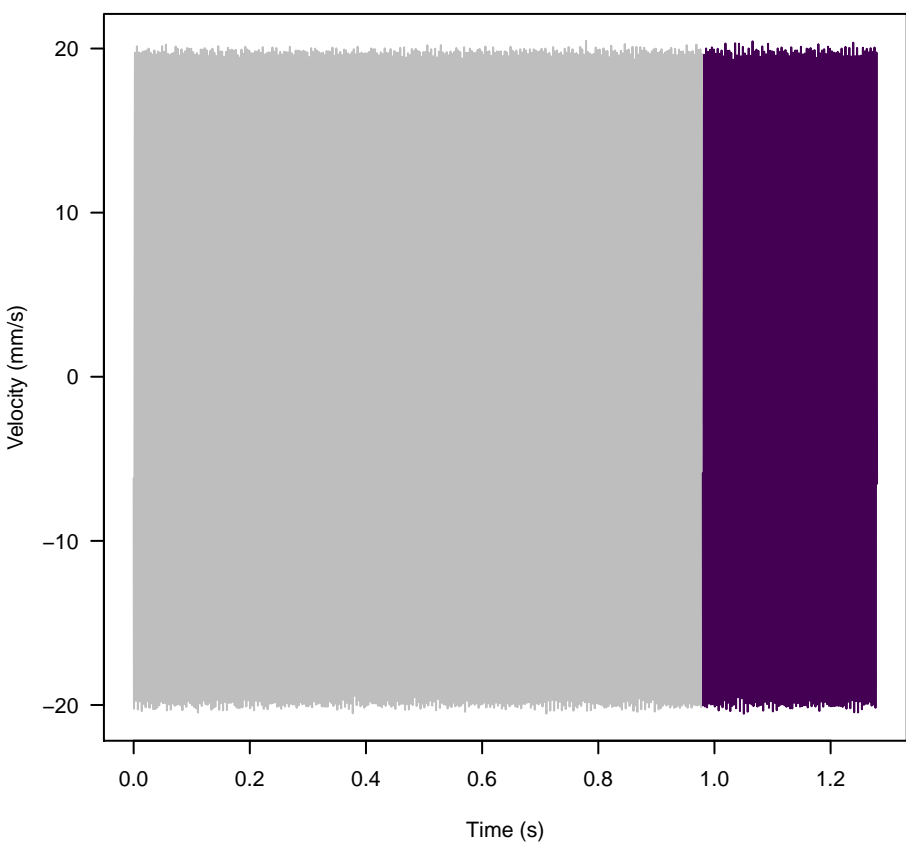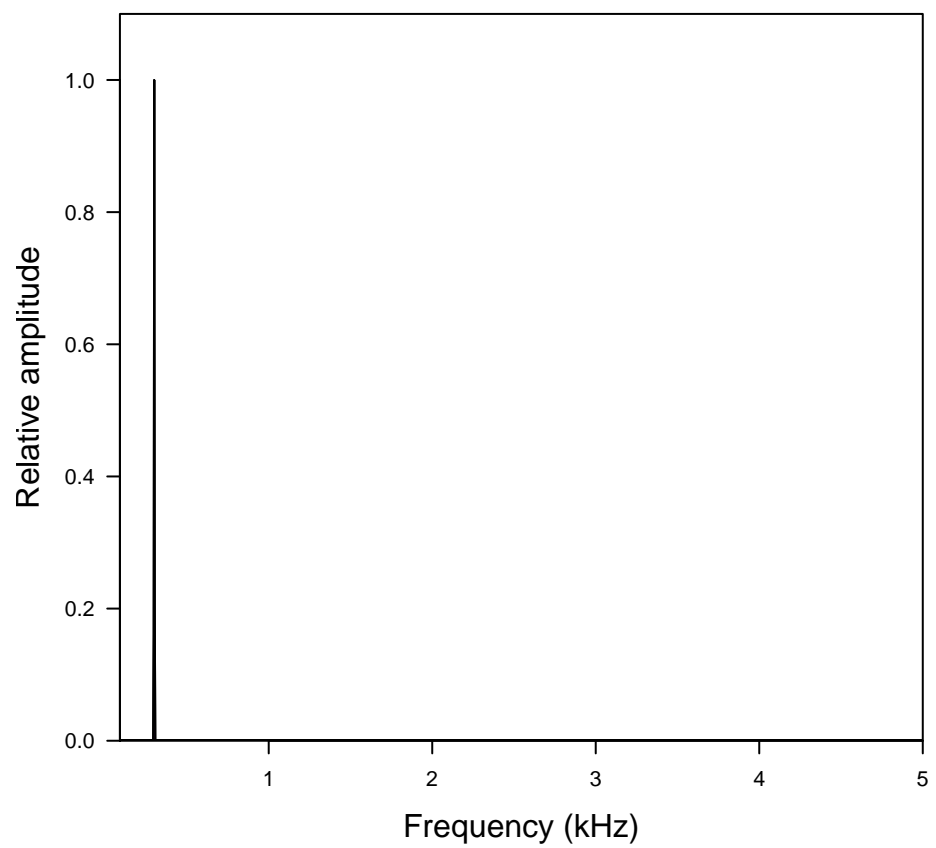

Vel. = 0.028 ; Str. = PA ; Axis = x ; Fl. accession = 10-s-77-3

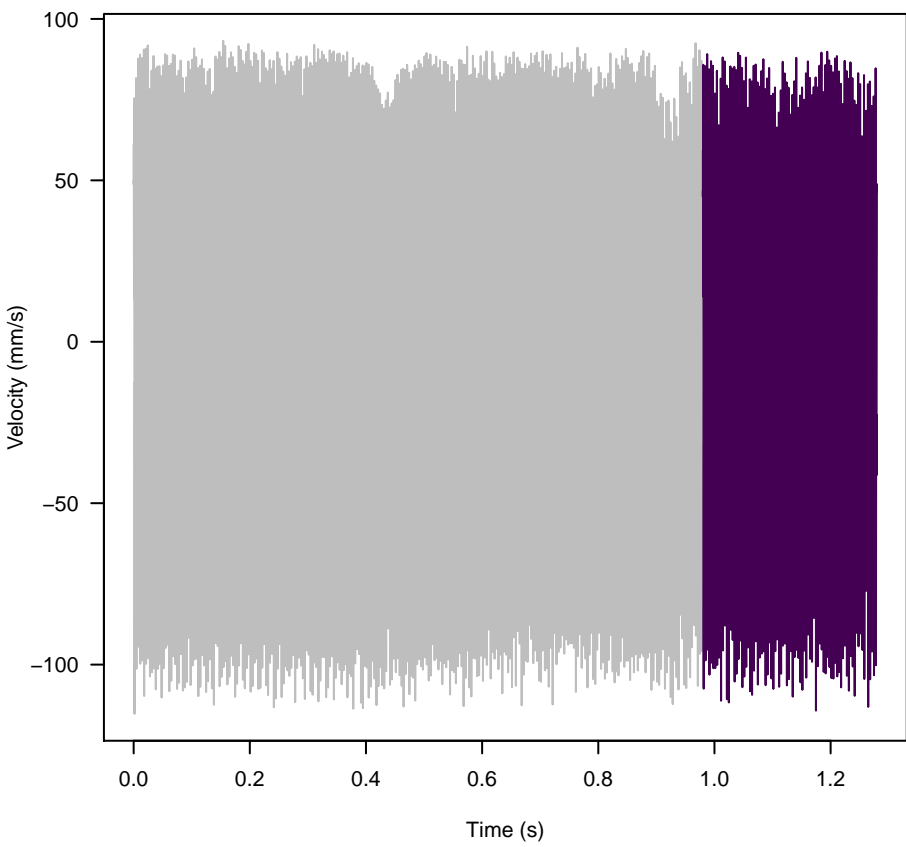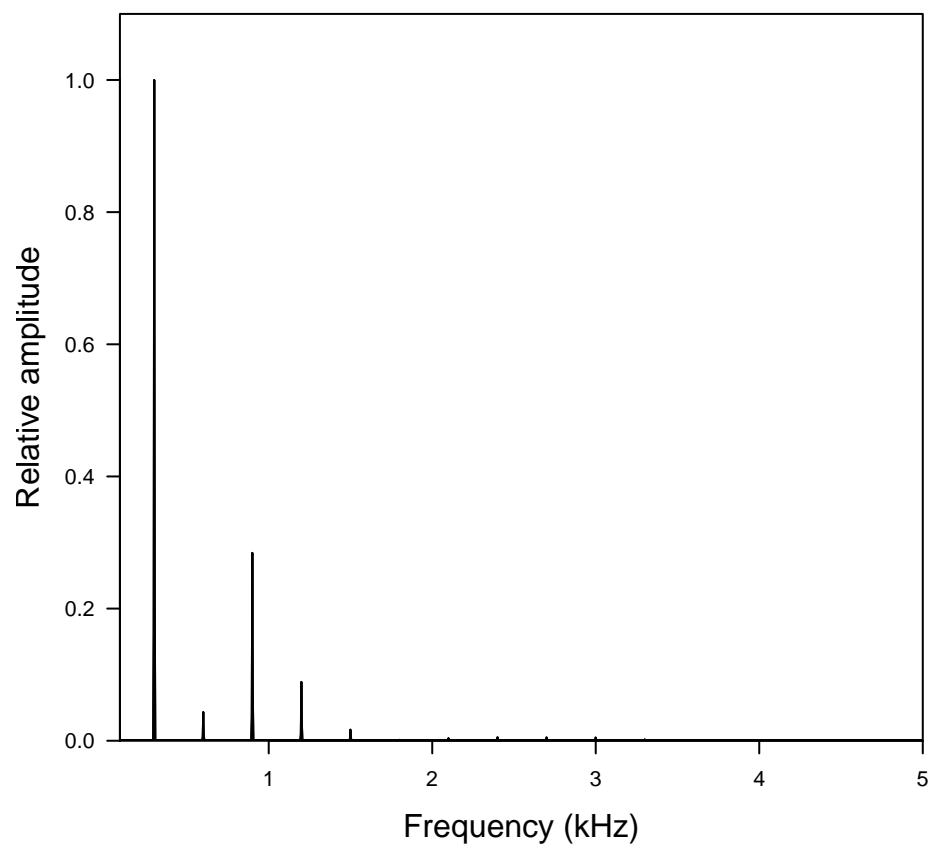

Vel. = 0.028 ; Str. = Receptacle ; Axis = x ; Fl. accession = 10-s-77-3

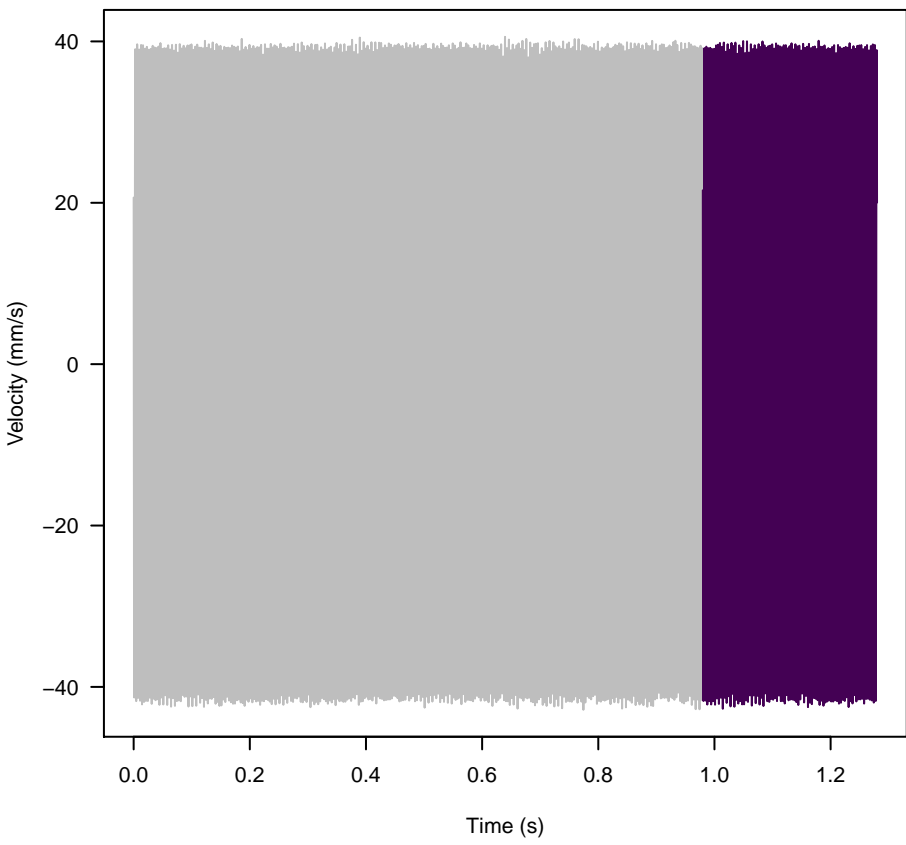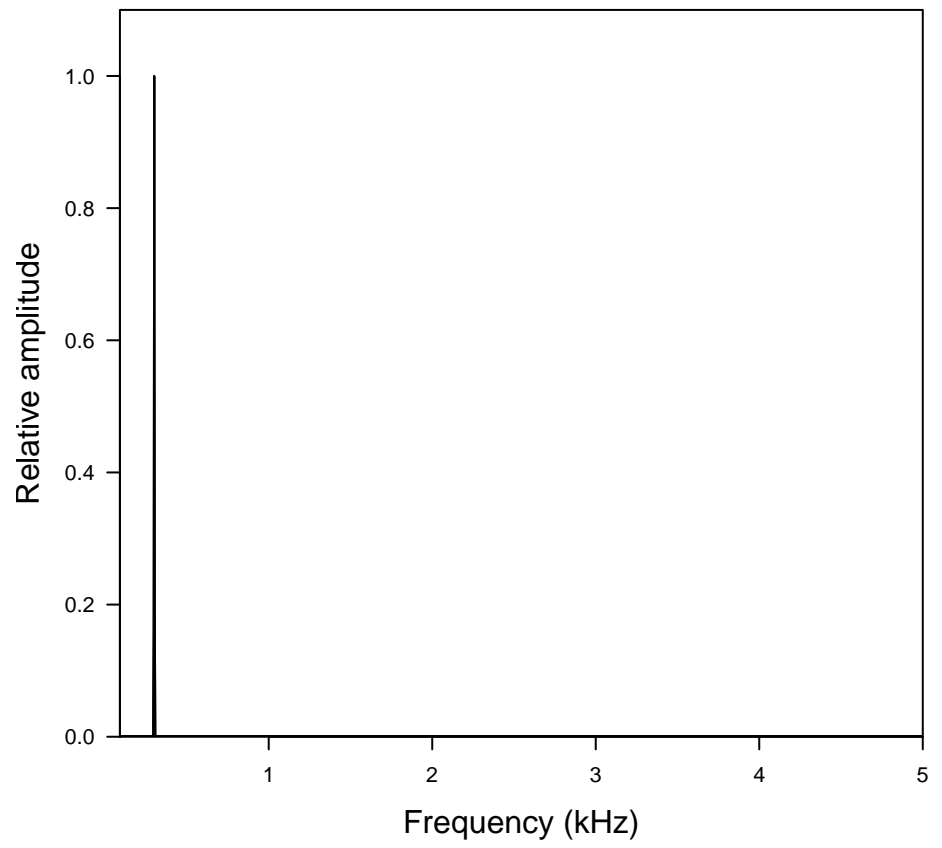

Vel. = 0.028 ; Str. = FA ; Axis = x ; Fl. accession = 10-s-77-3

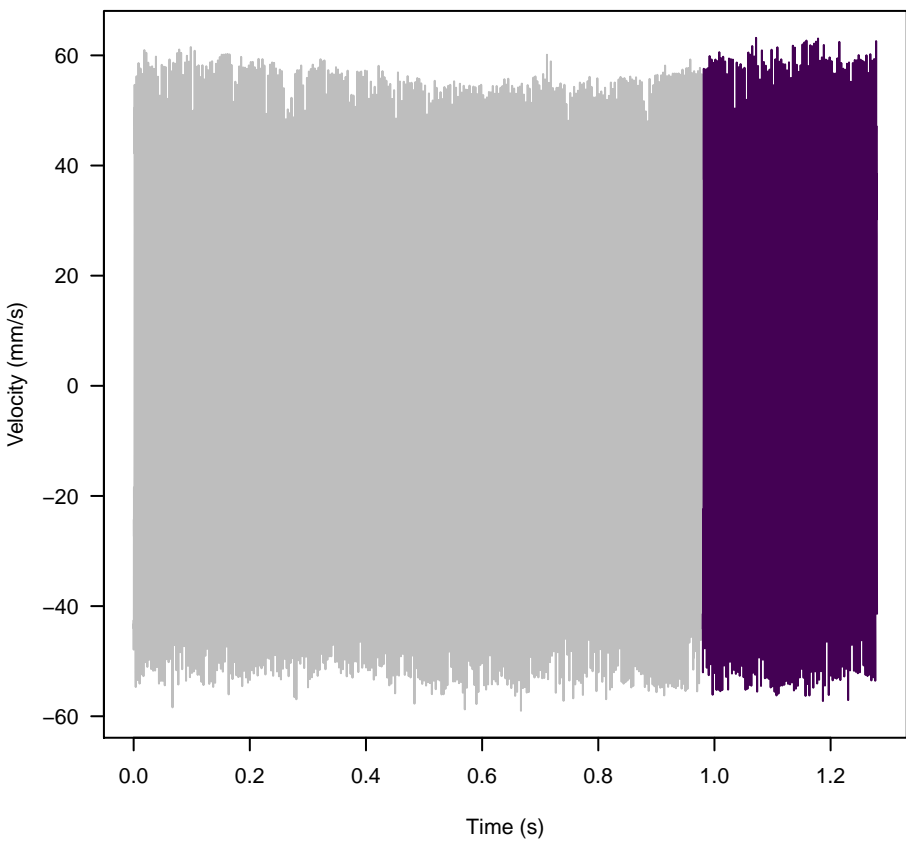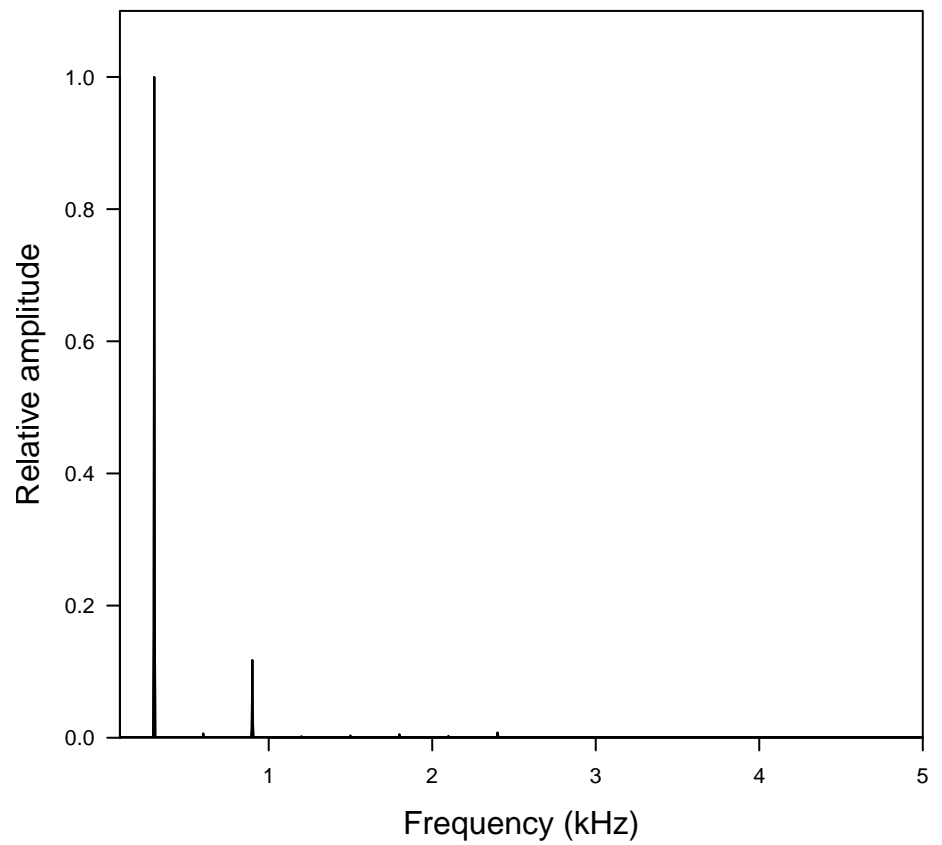

Vel. = 0.028 ; Str. = Receptacle ; Axis = x ; Fl. accession = 10-s-77-3

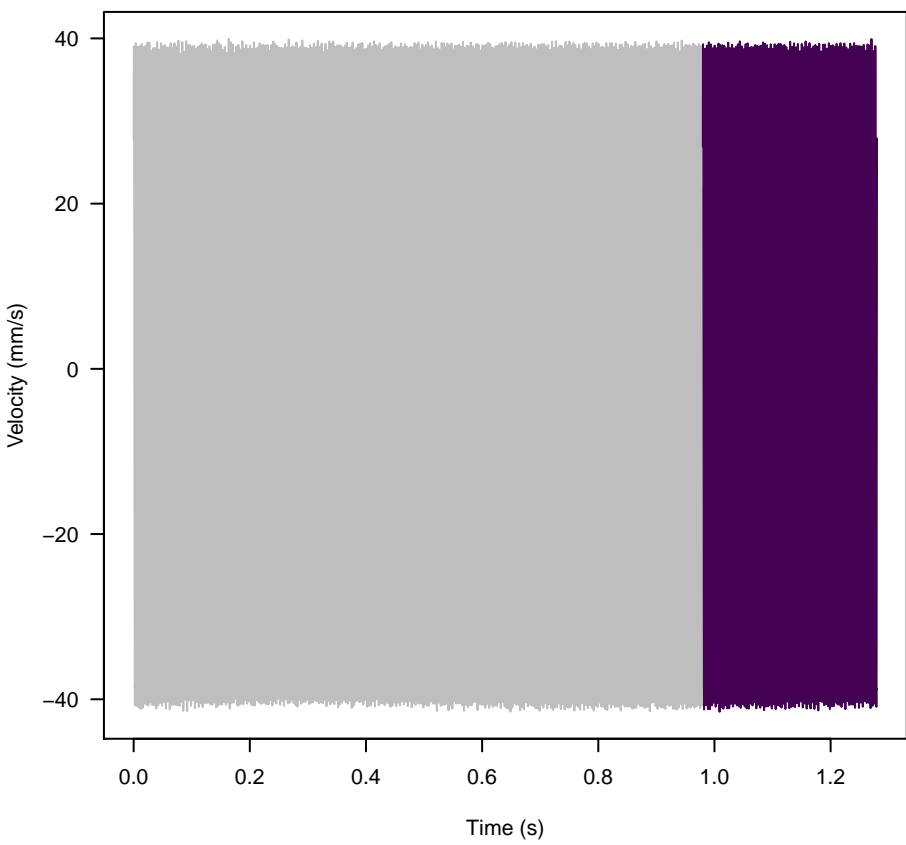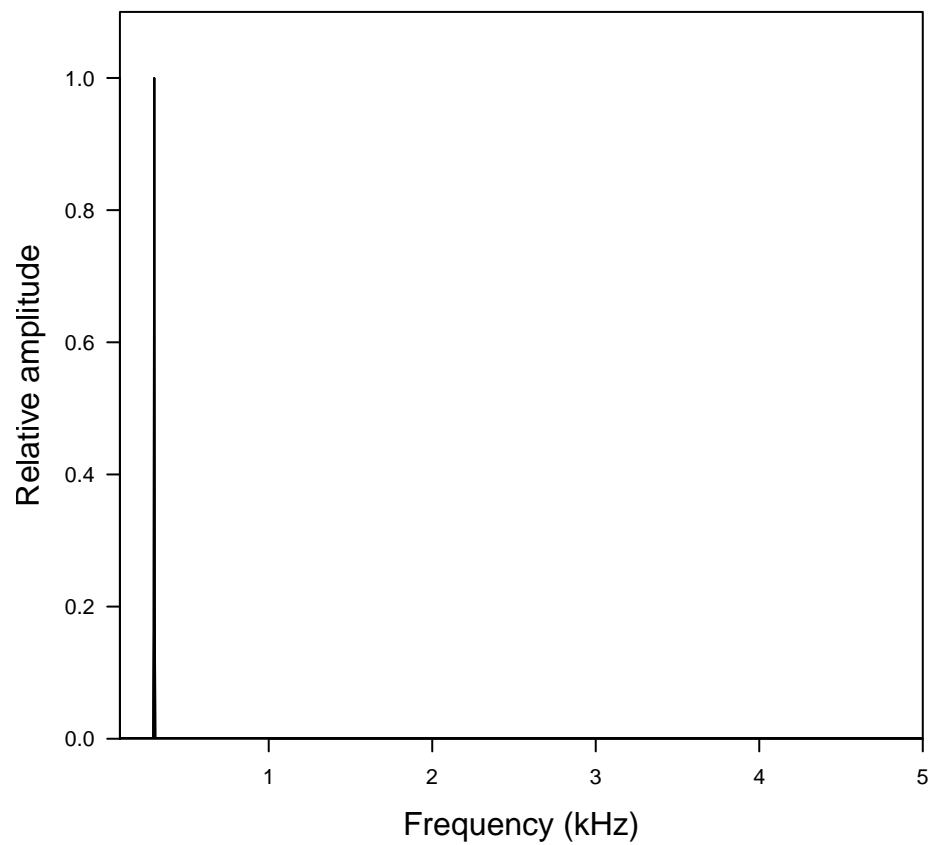

Vel. = 0.028 ; Str. = Corolla ; Axis = x ; Fl. accession = 10-s-77-3

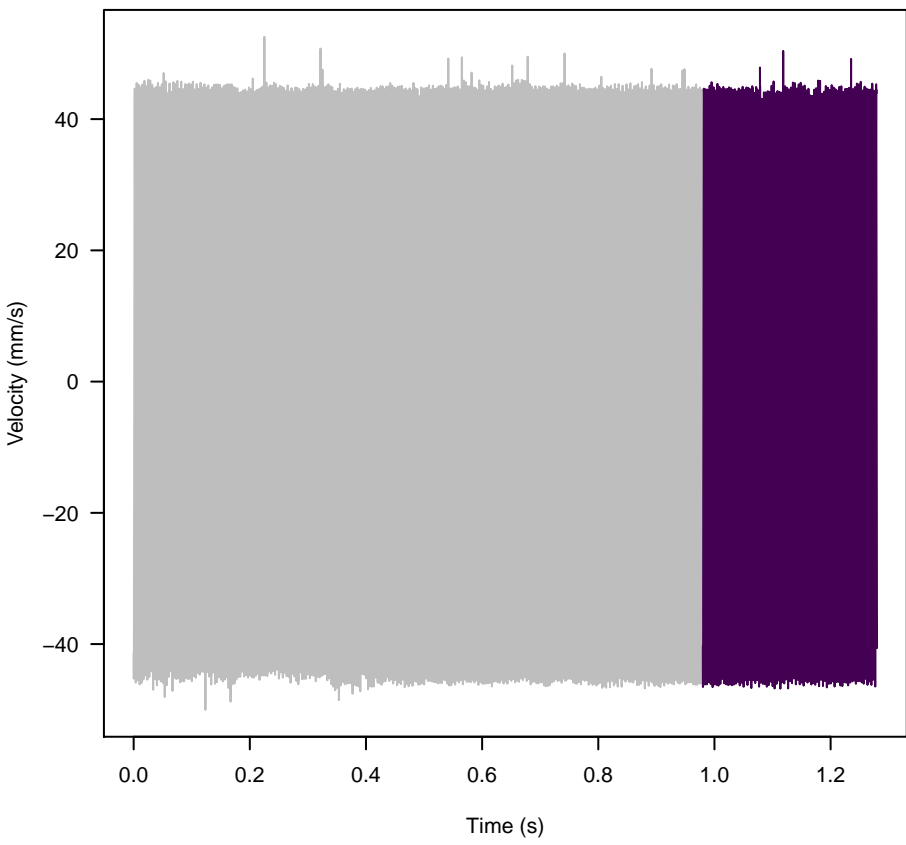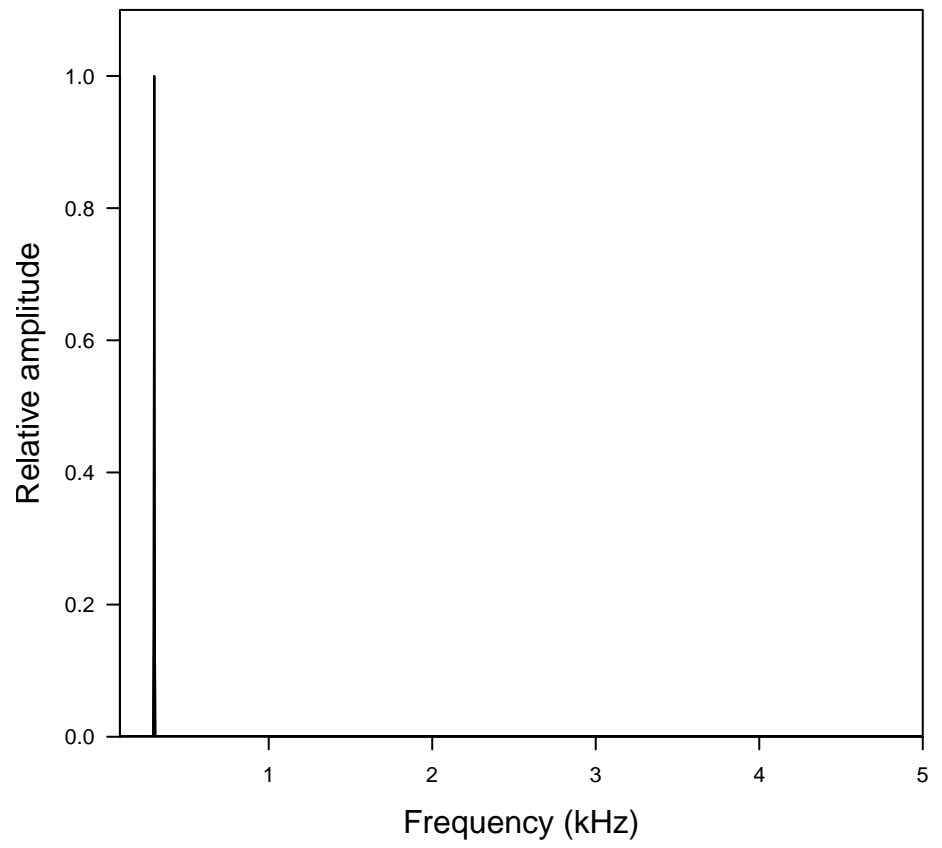

Vel. = 0.028 ; Str. = Receptacle ; Axis = x ; Fl. accession = 10-s-77-3

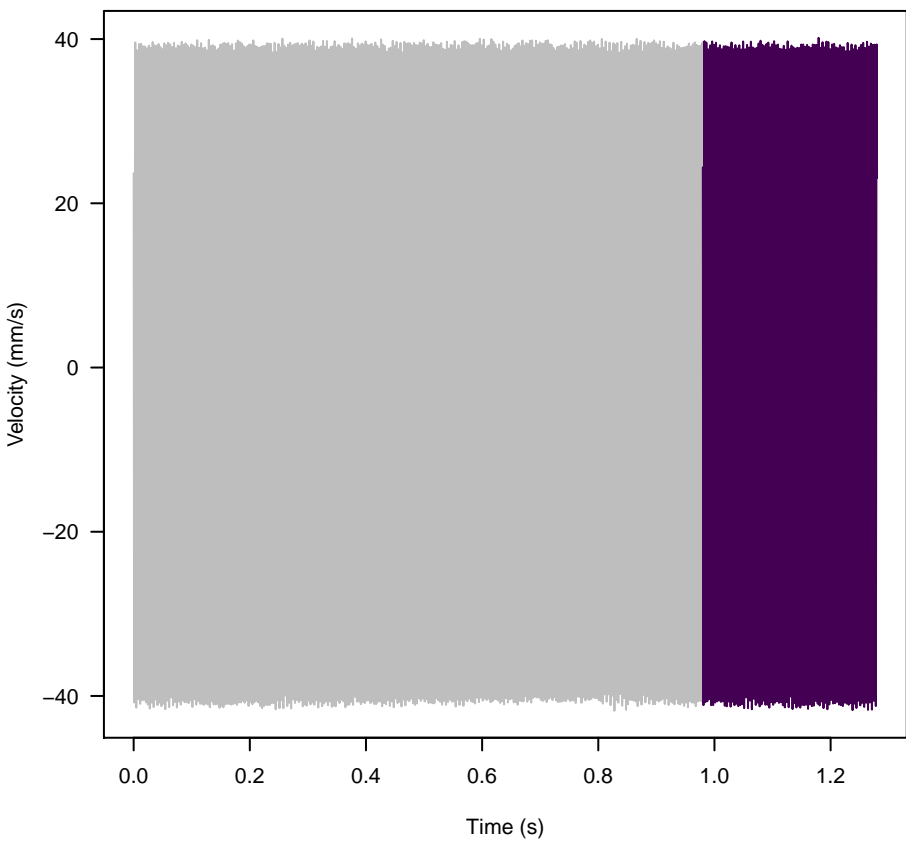

Vel. = 0.057 ; Str. = Corolla ; Axis = x ; Fl. accession = 10-s-77-3

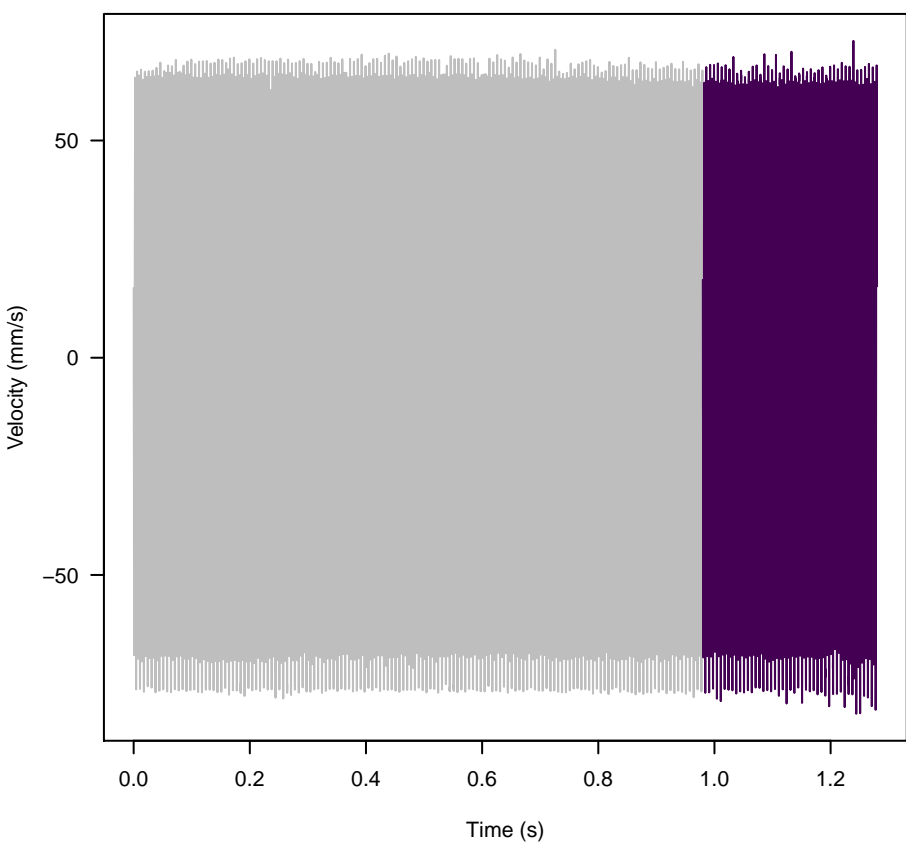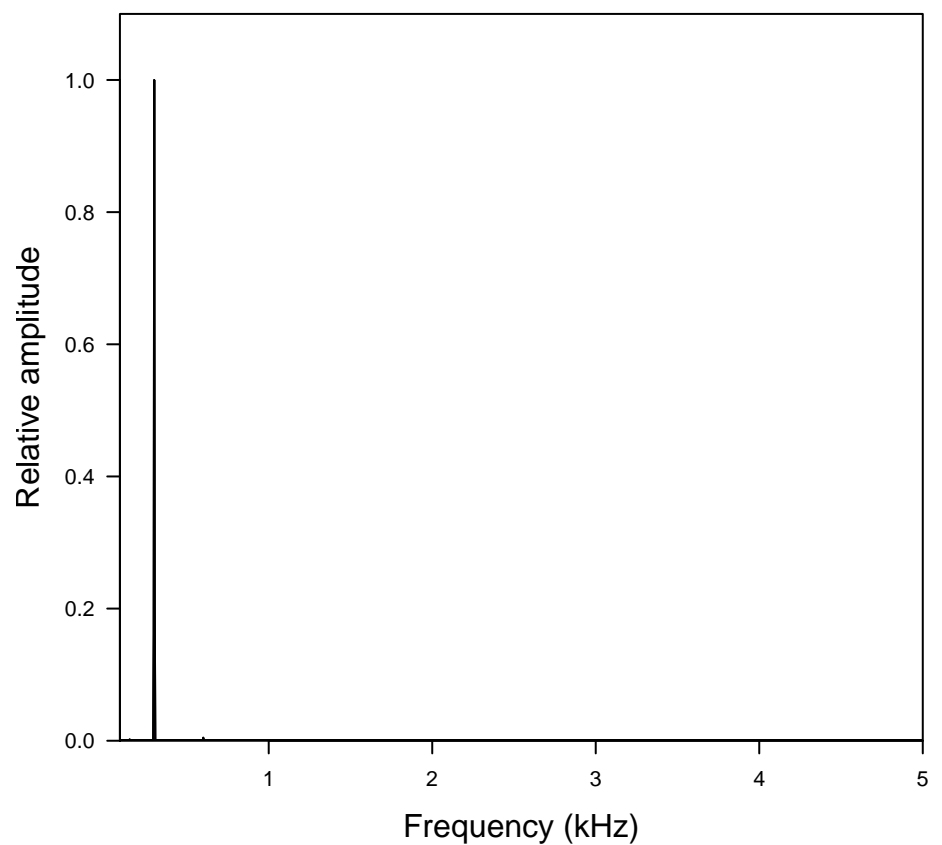

Vel. = 0.057 ; Str. = Receptacle ; Axis = x ; Fl. accession = 10-s-77-3

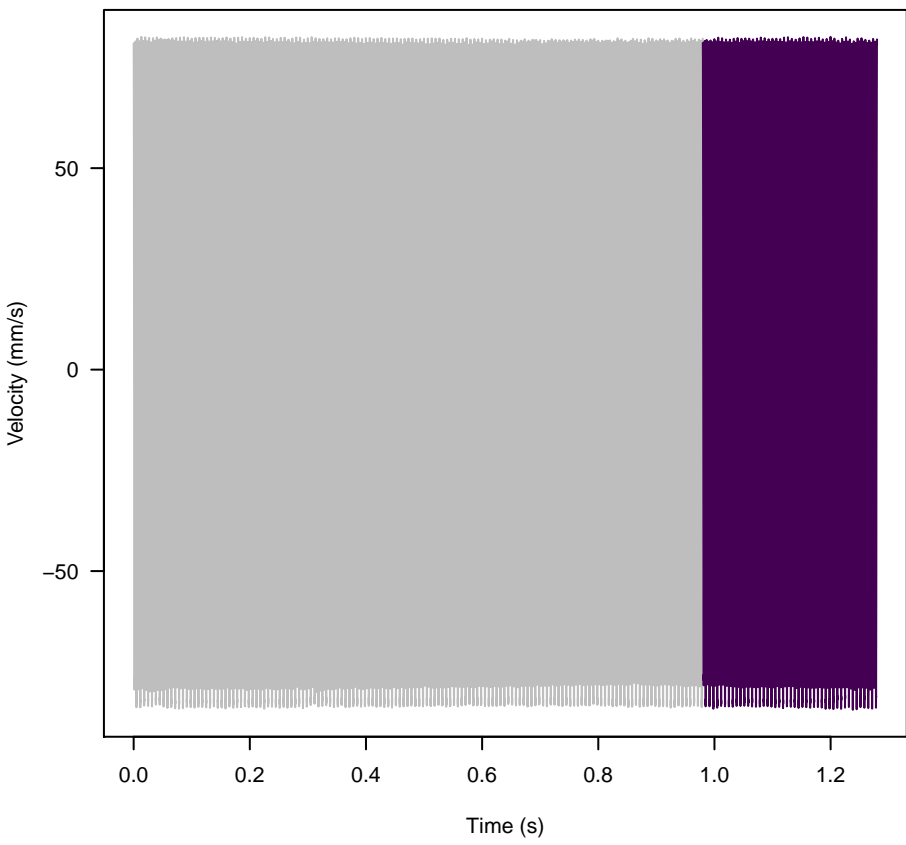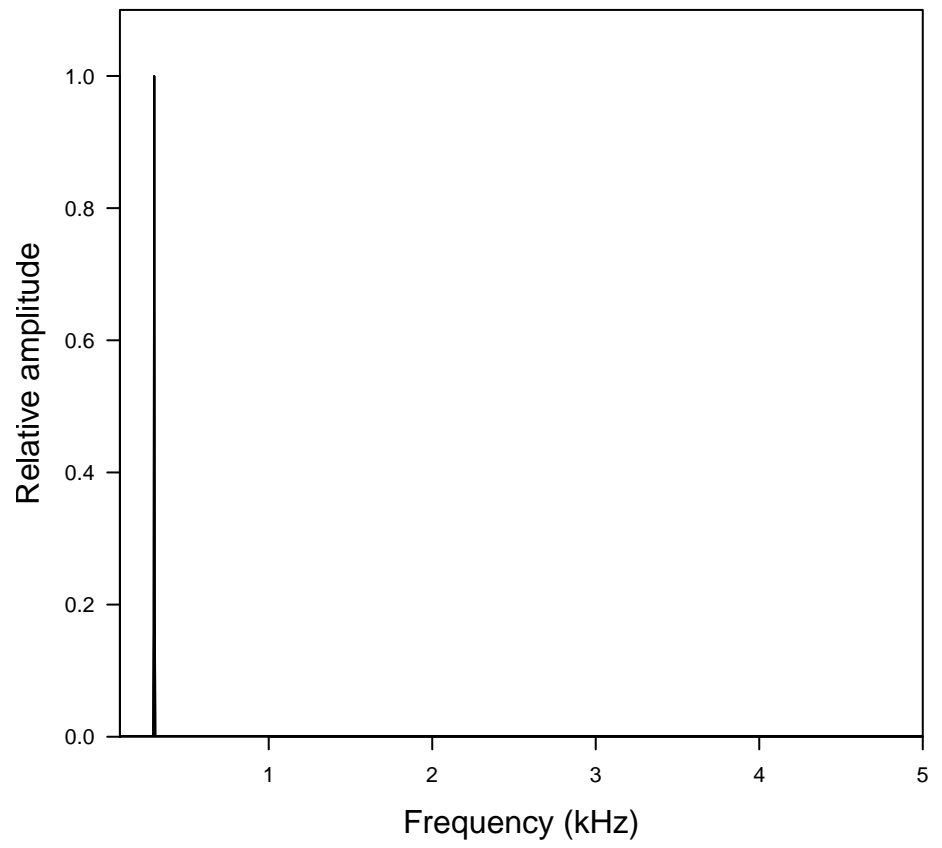

Vel. = 0.057 ; Str. = FA ; Axis = x ; Fl. accession = 10-s-77-3

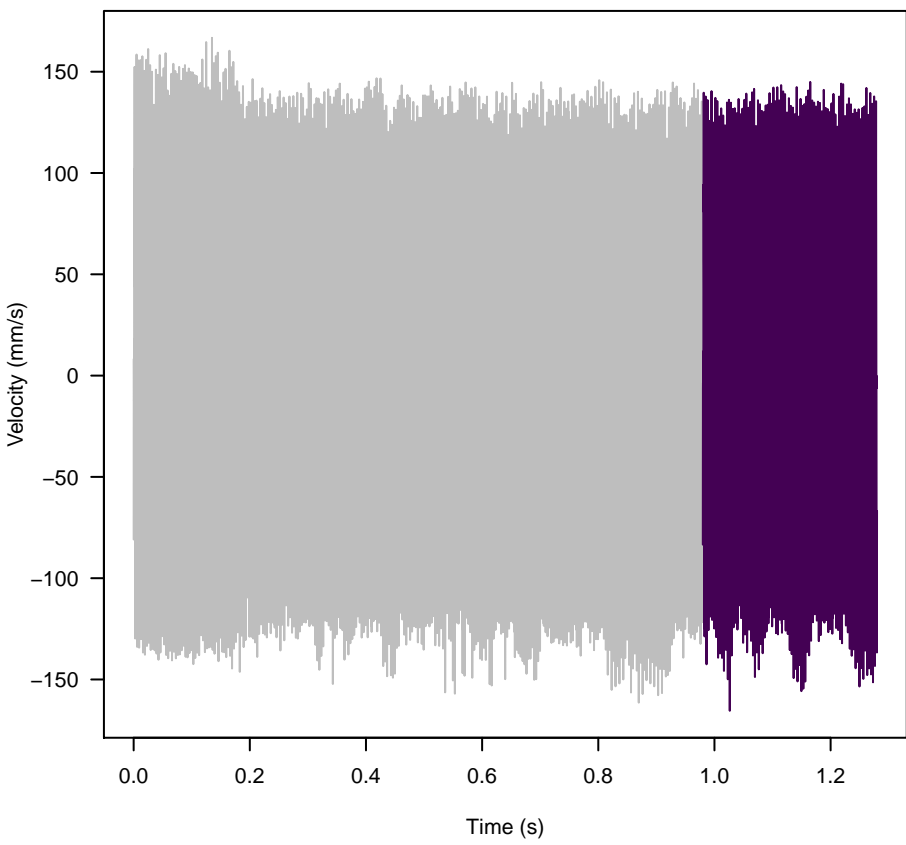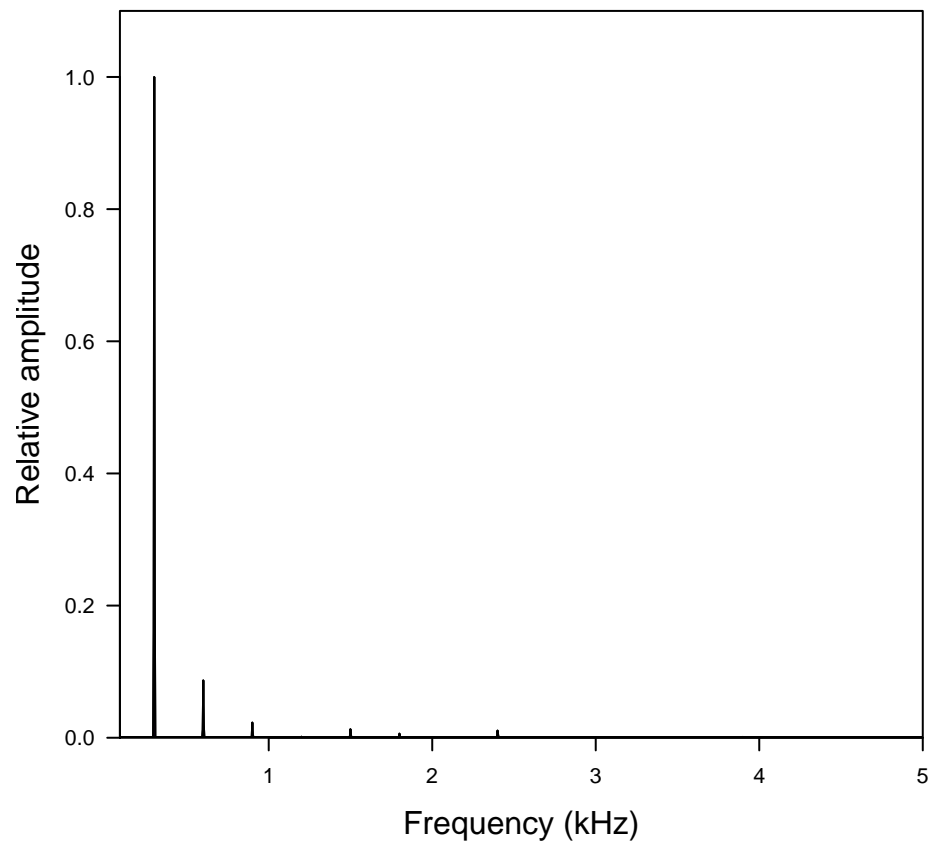

Vel. = 0.057 ; Str. = Receptacle ; Axis = x ; Fl. accession = 10-s-77-3

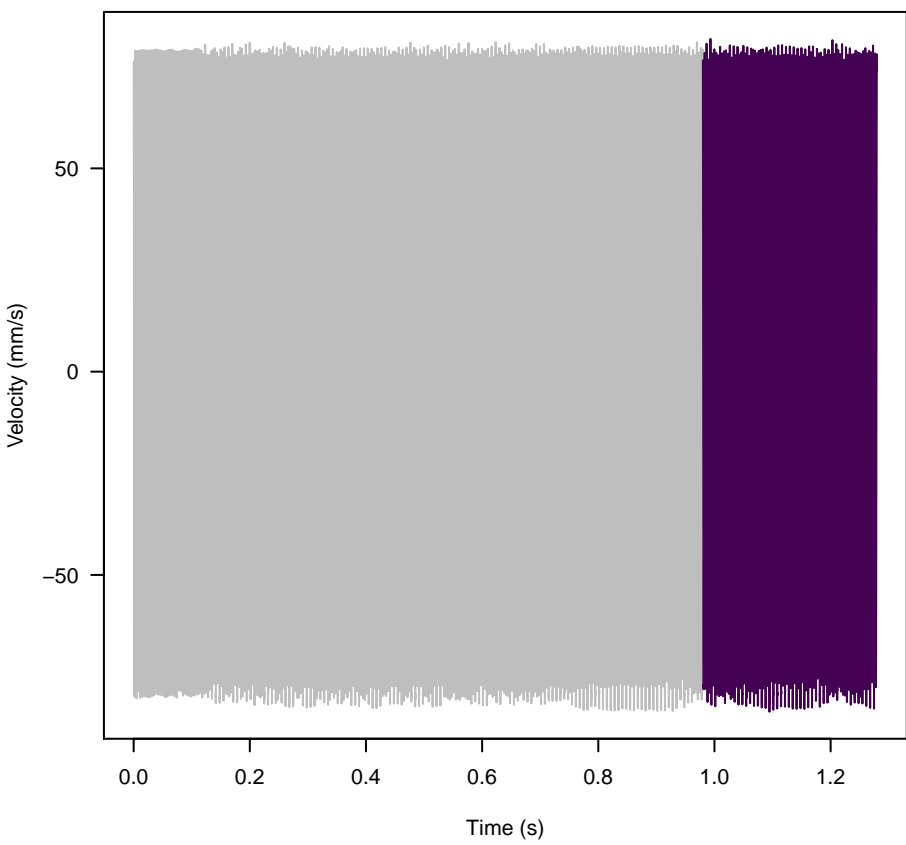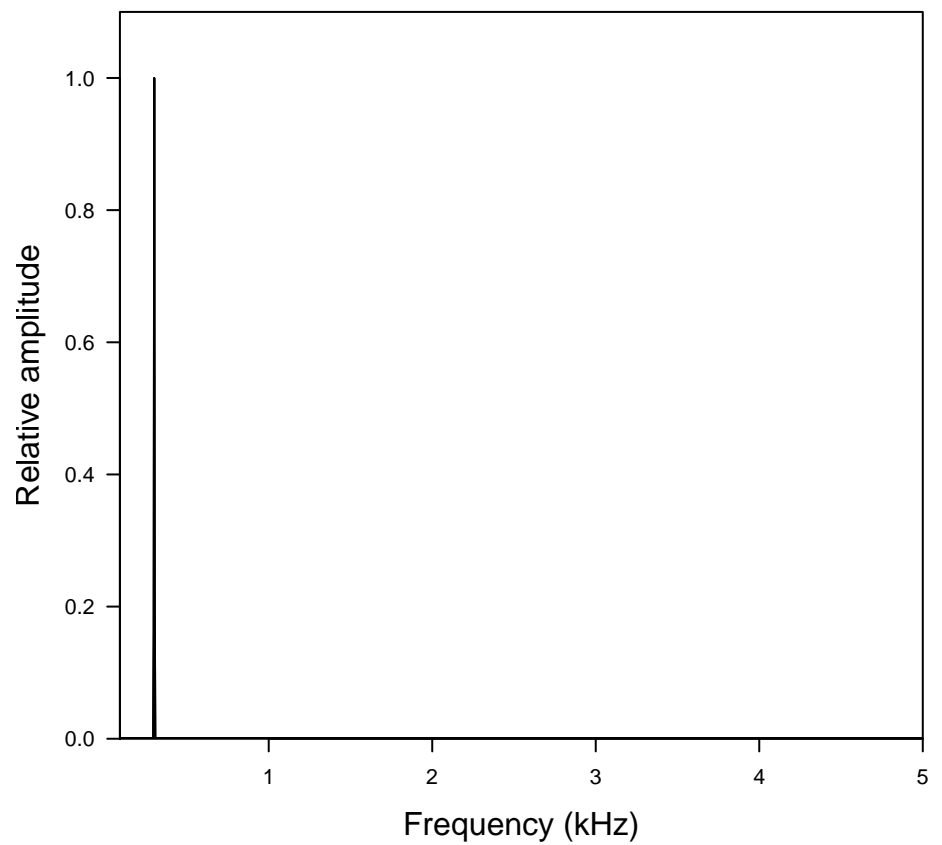

Vel. = 0.057 ; Str. = PA ; Axis = x ; Fl. accession = 10-s-77-3

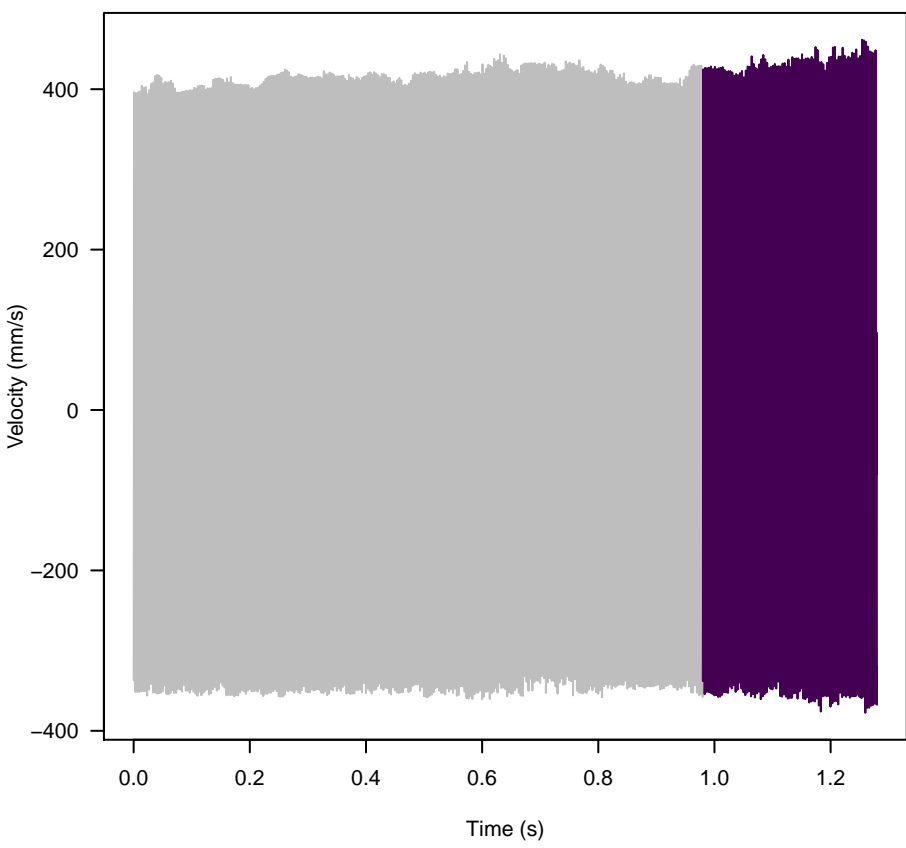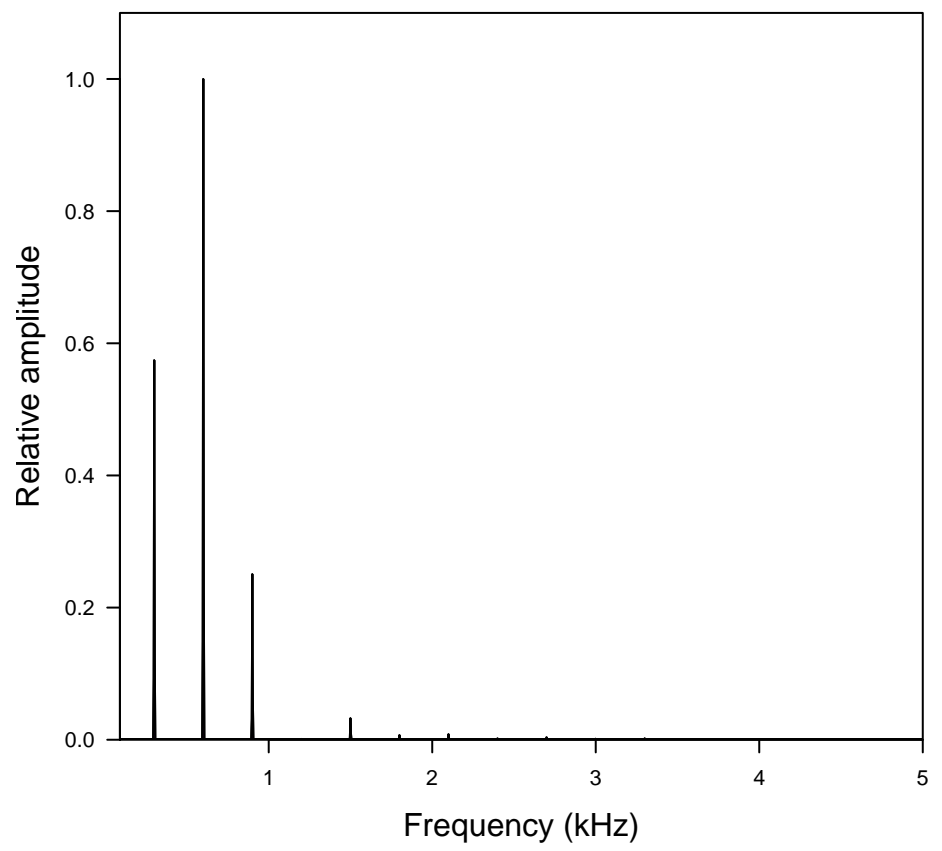

Vel. = 0.057 ; Str. = Receptacle ; Axis = x ; Fl. accession = 10-s-77-3

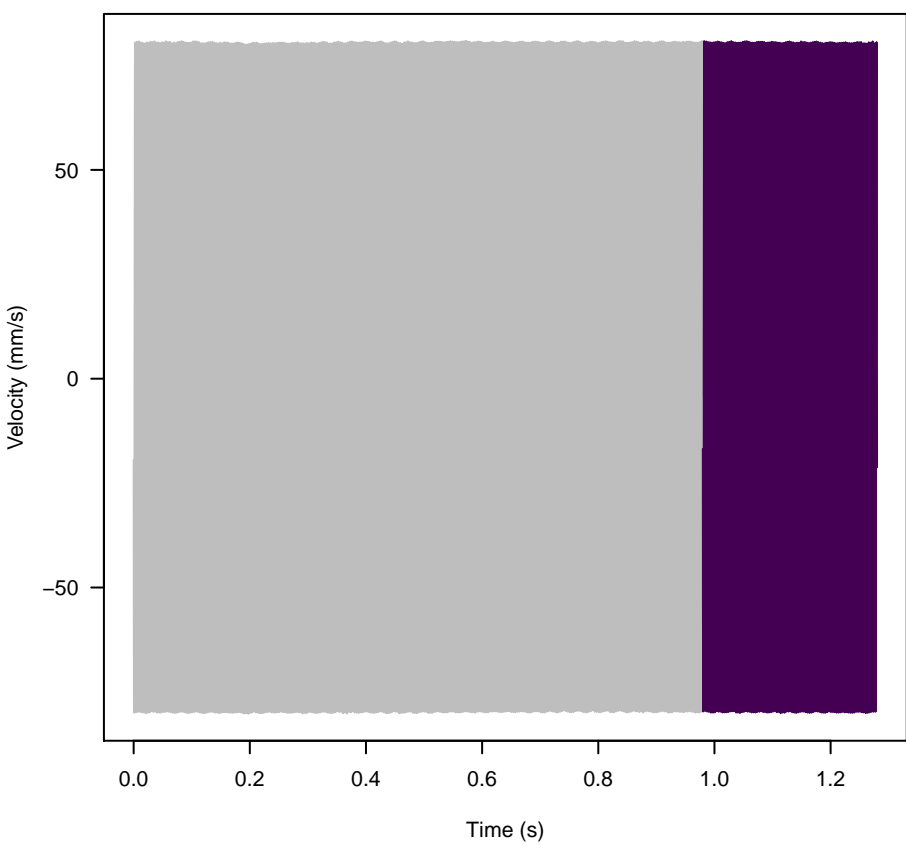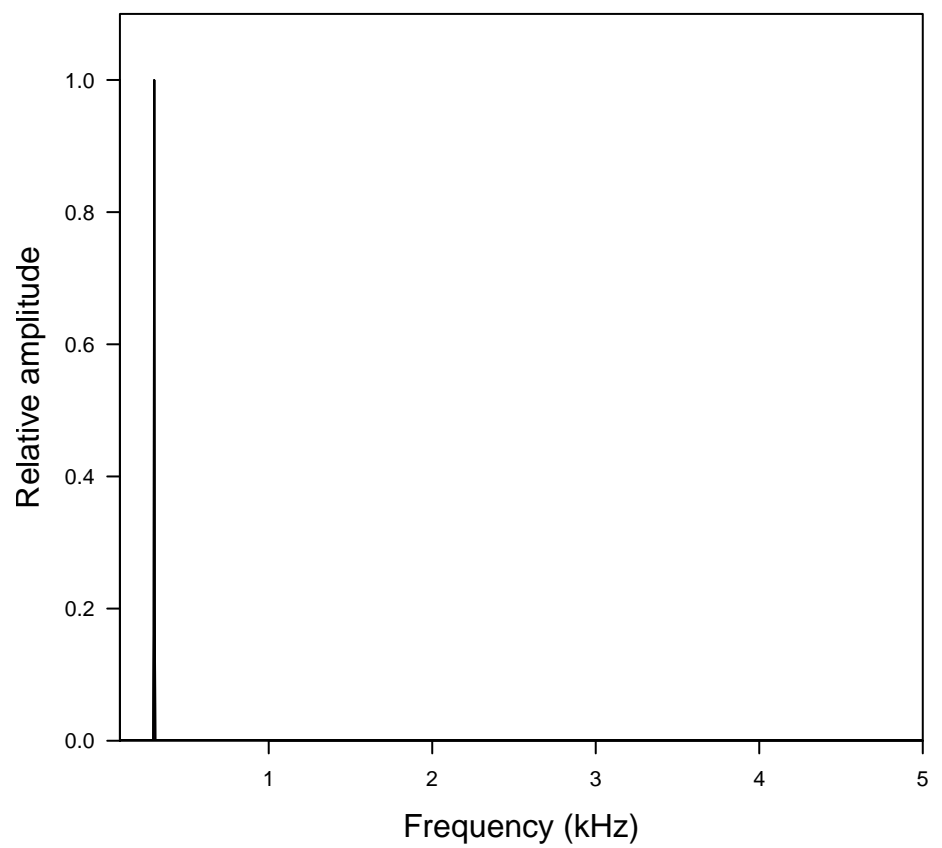

Vel. = 0.014 ; Str. = Corolla ; Axis = x ; Fl. accession = 10-s-79-27

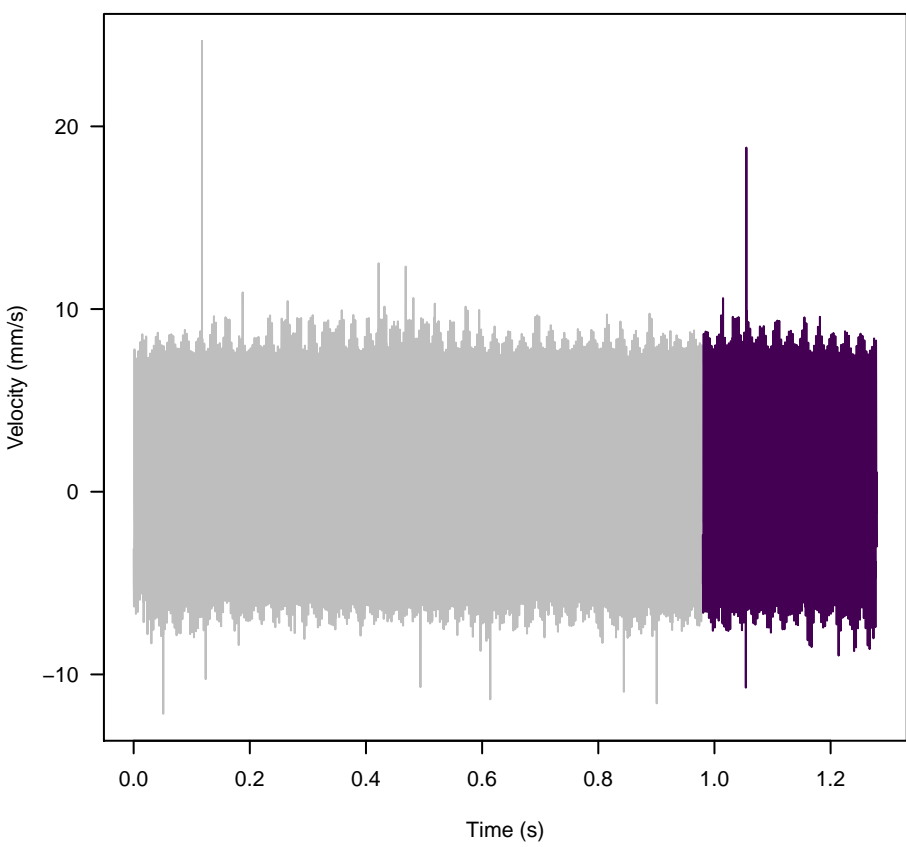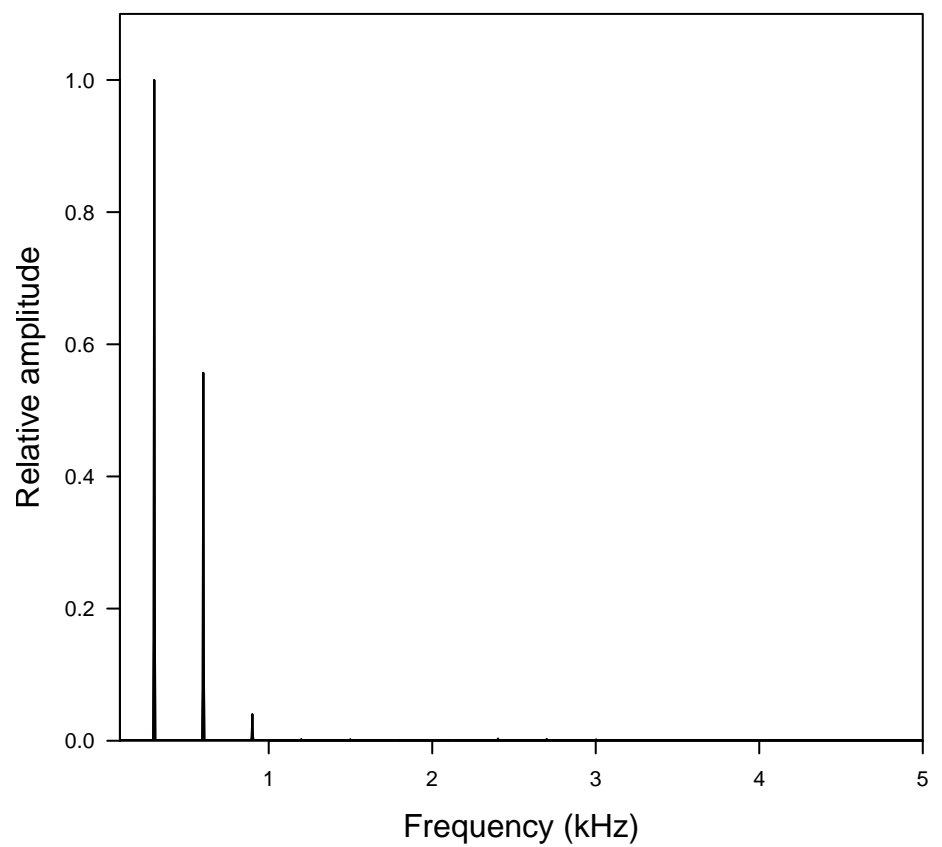



Vel. = 0.014 ; Str. = Receptacle ; Axis = x ; Fl. accession = 10-s-79-27

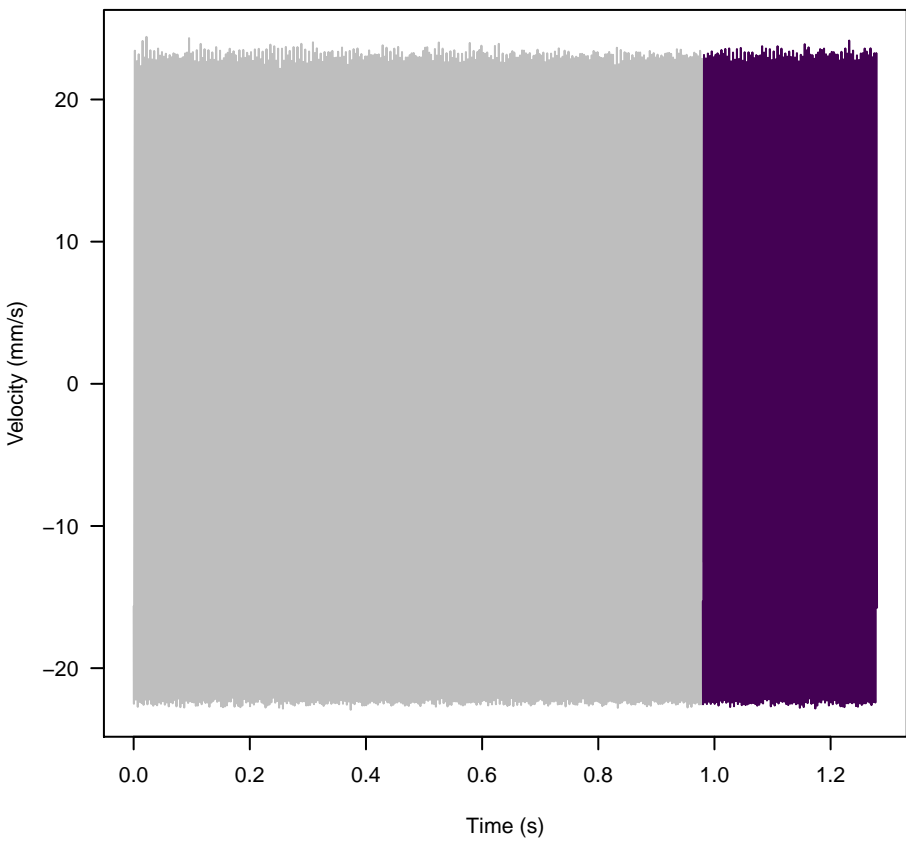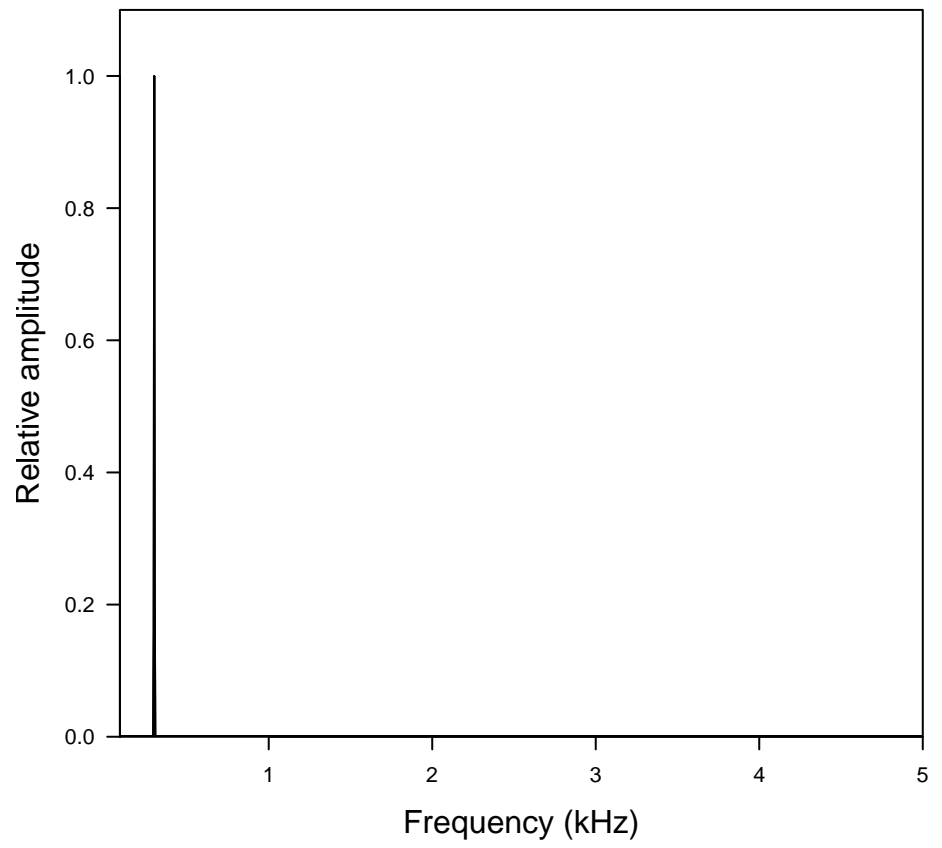

Vel. = 0.014 ; Str. = FA ; Axis = x ; Fl. accession = 10-s-79-27

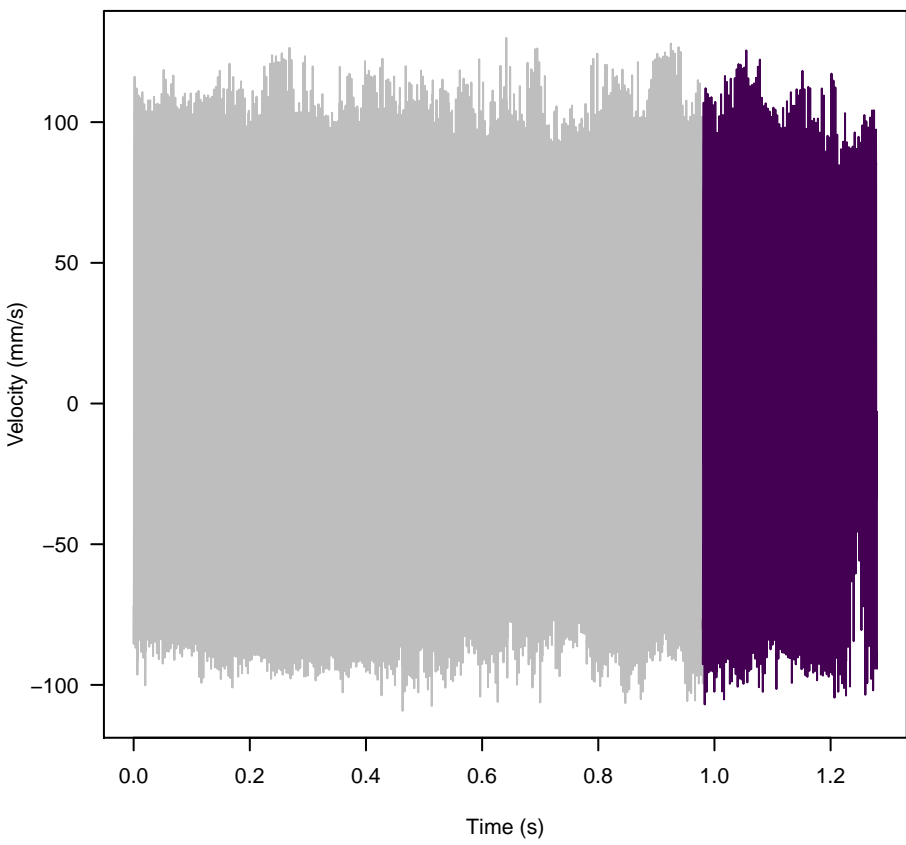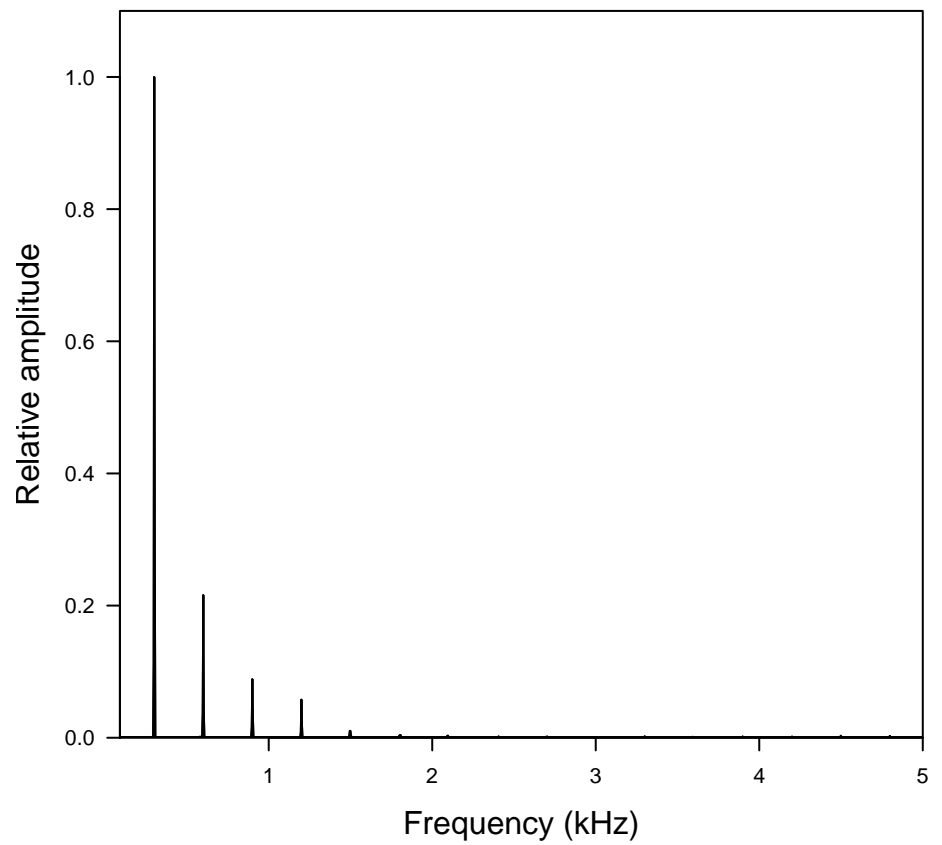

Vel. = 0.014 ; Str. = Receptacle ; Axis = x ; Fl. accession = 10-s-79-27

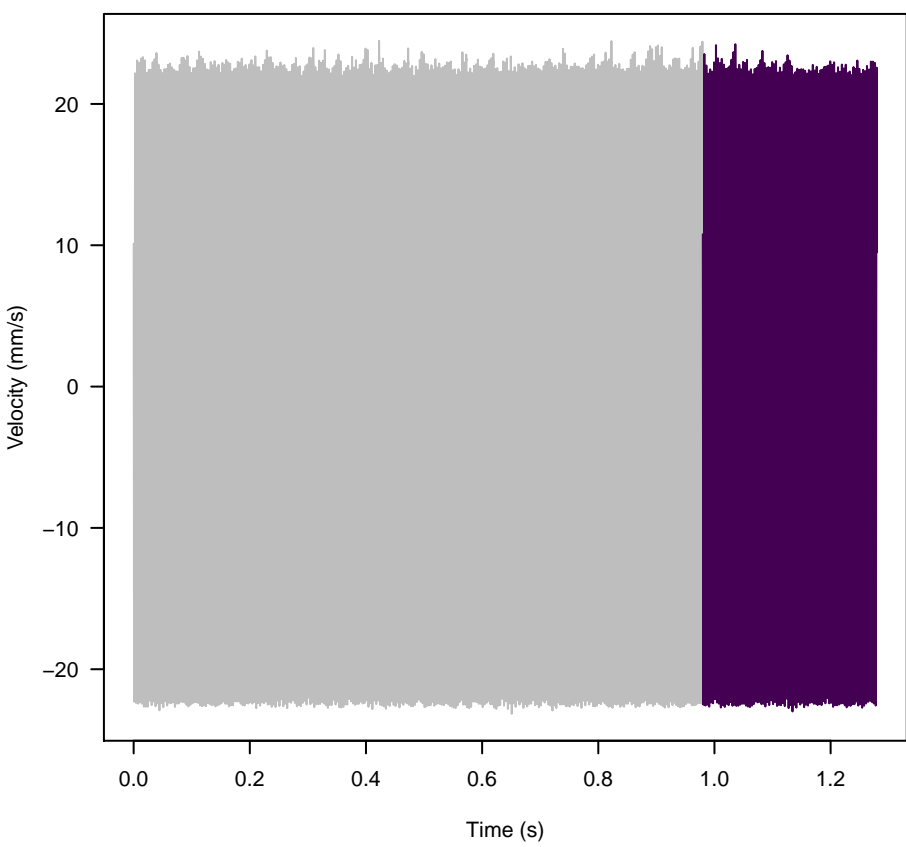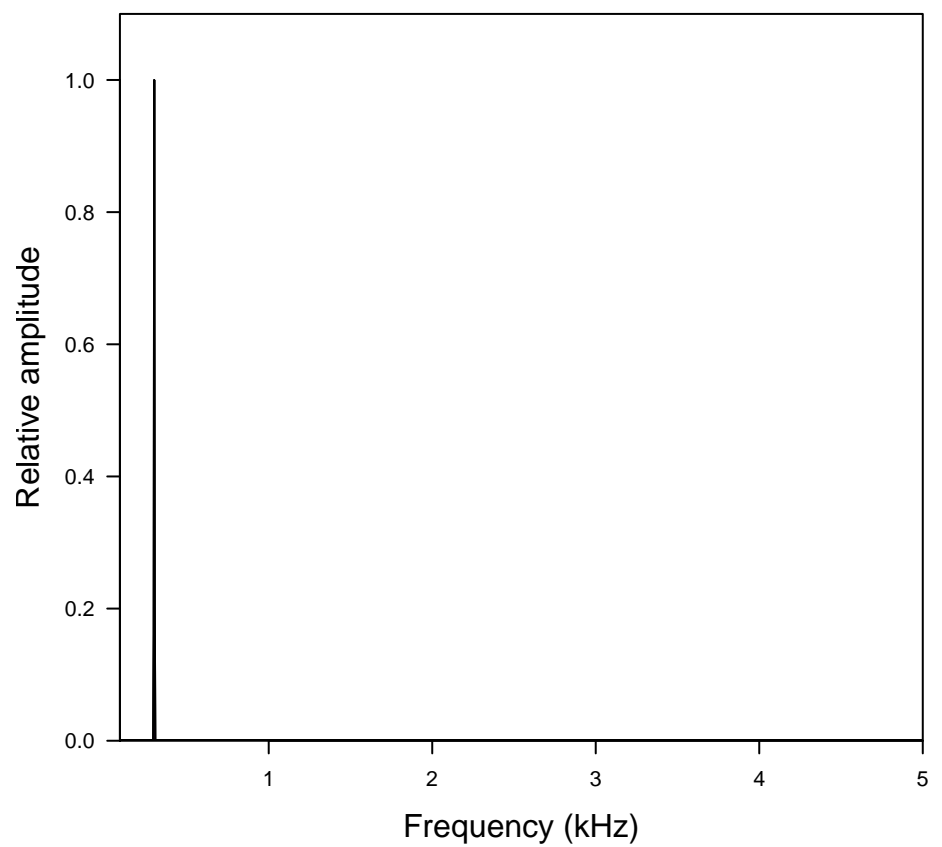

Vel. = 0.014 ; Str. = PA ; Axis = x ; Fl. accession = 10-s-79-27

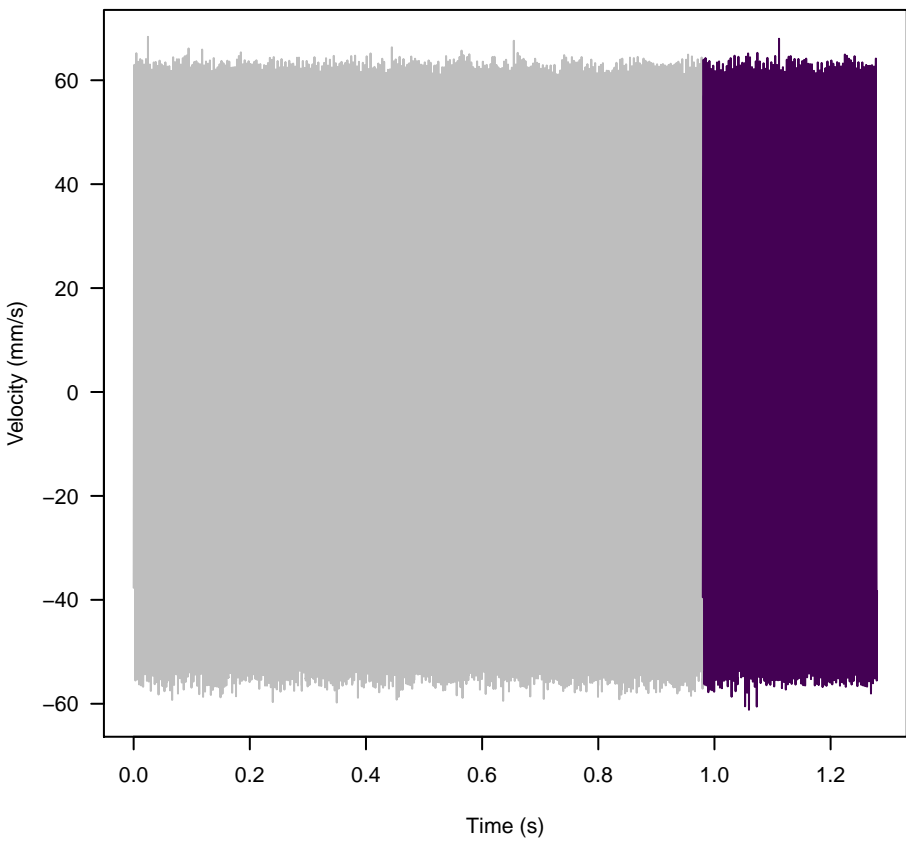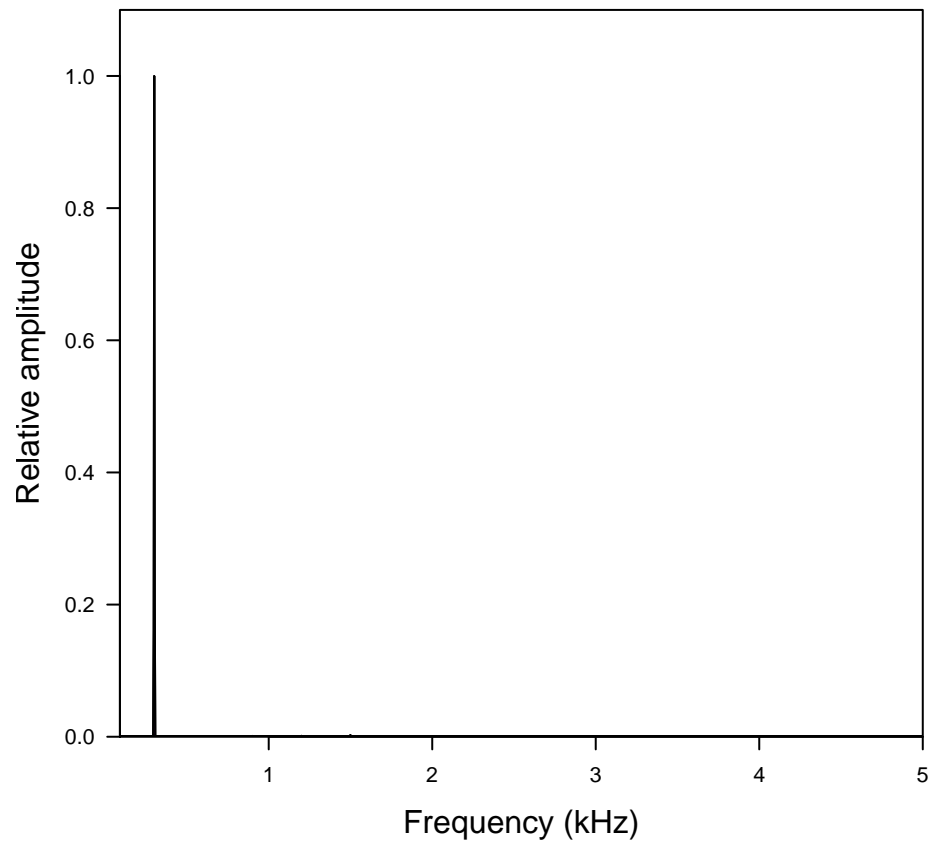

Vel. = 0.014 ; Str. = Receptacle ; Axis = x ; Fl. accession = 10-s-79-27

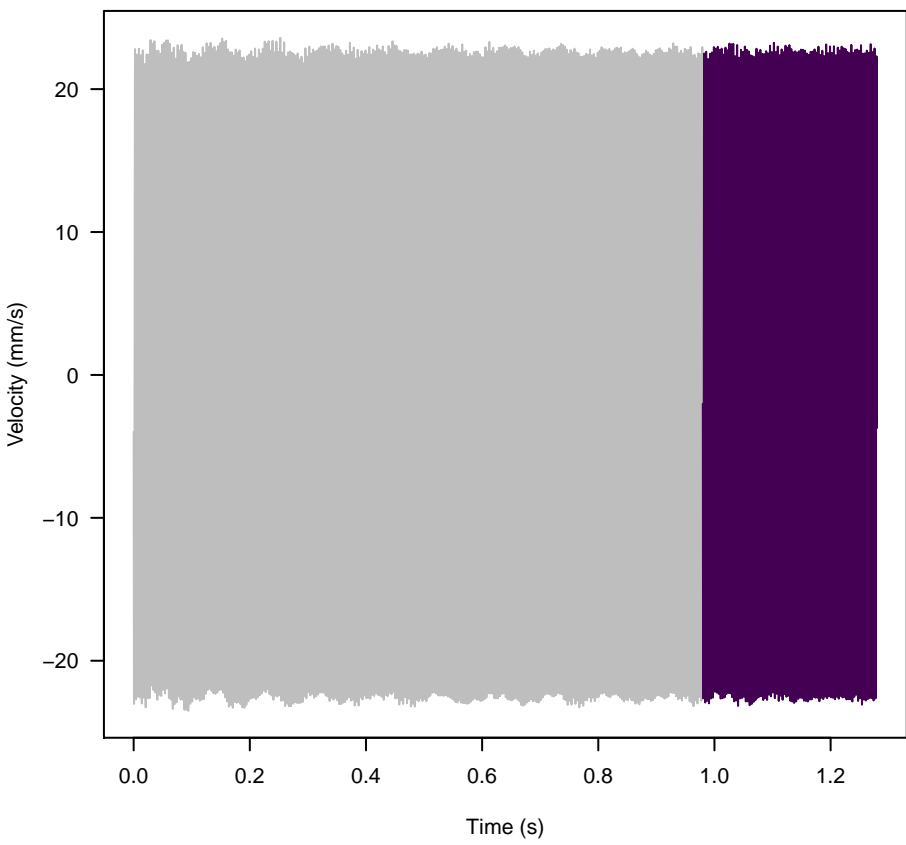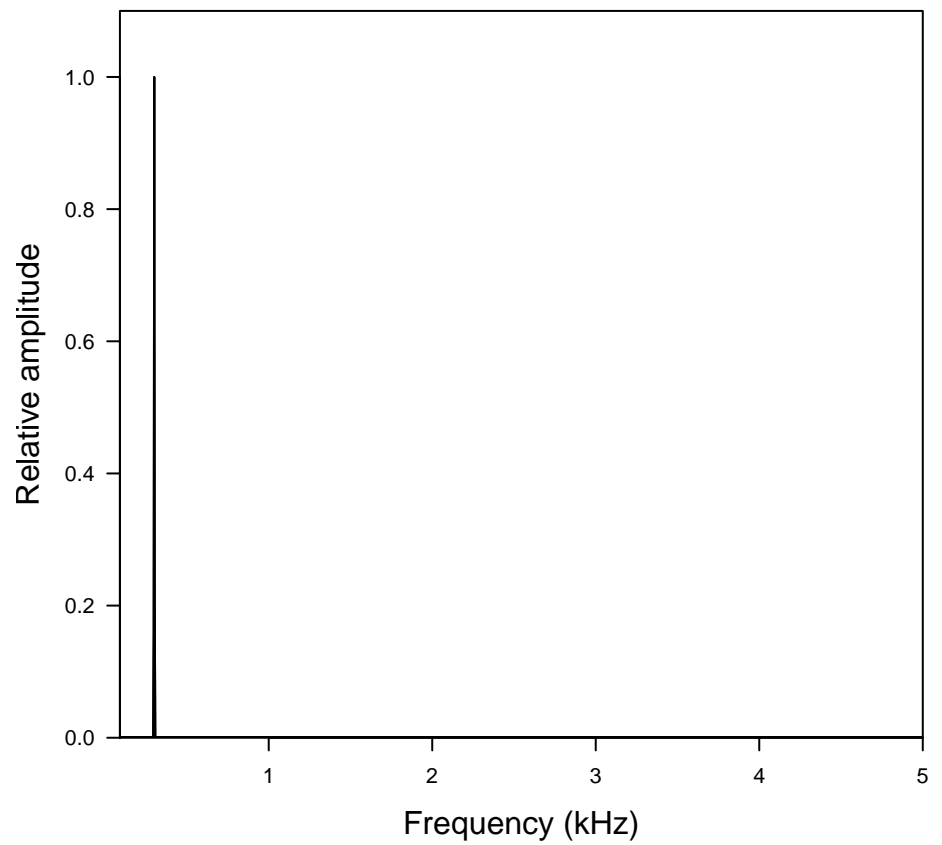

Vel. = 0.028 ; Str. = PA ; Axis = x ; Fl. accession = 10-s-79-27

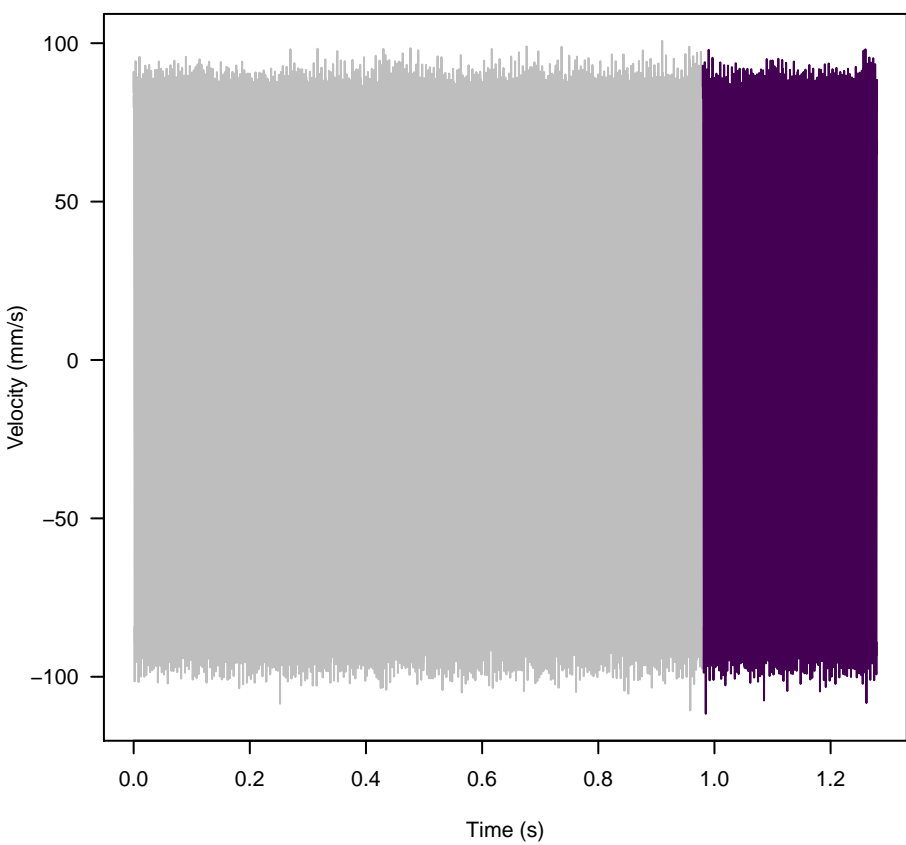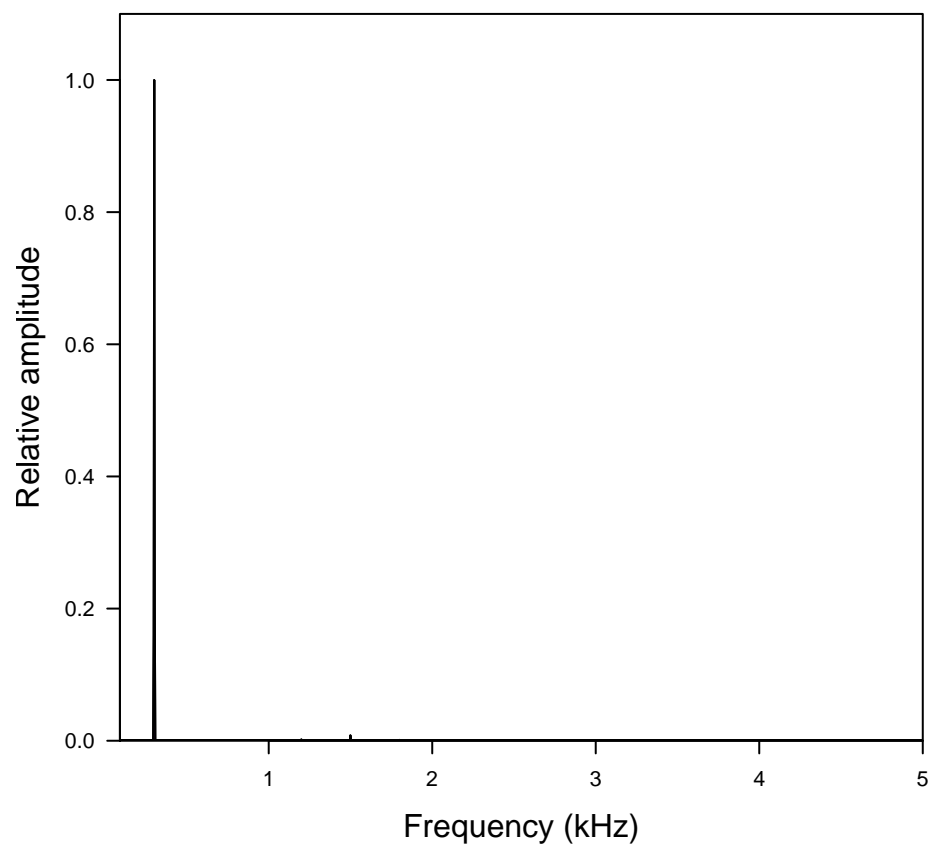

Vel. = 0.028 ; Str. = Receptacle ; Axis = x ; Fl. accession = 10-s-79-27

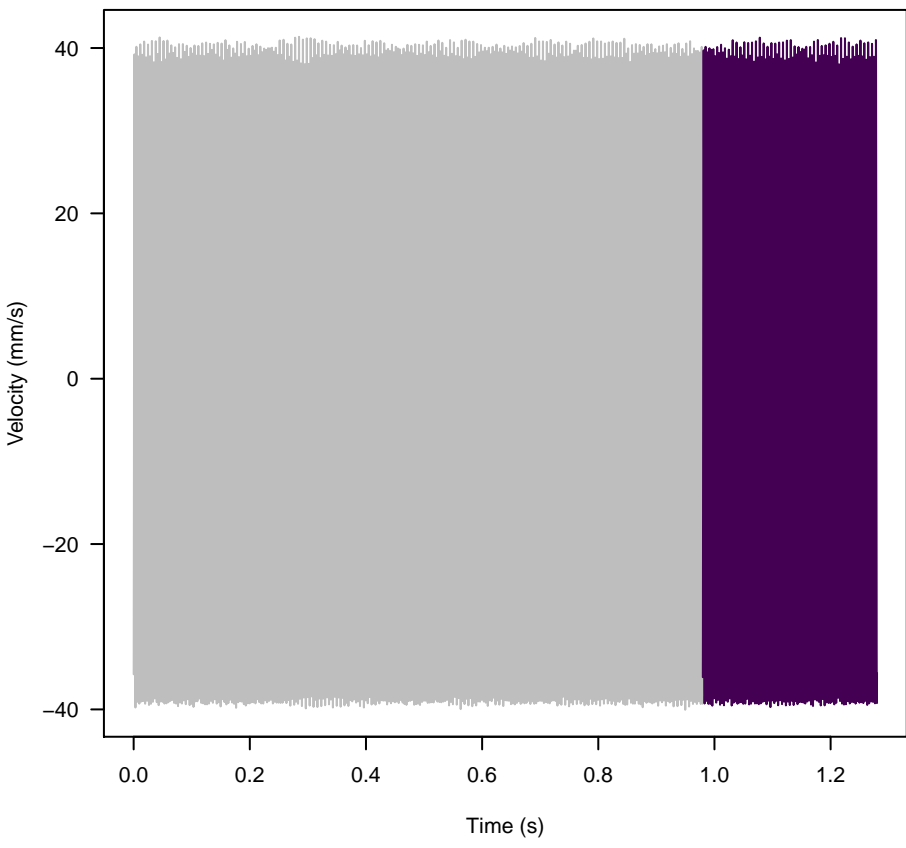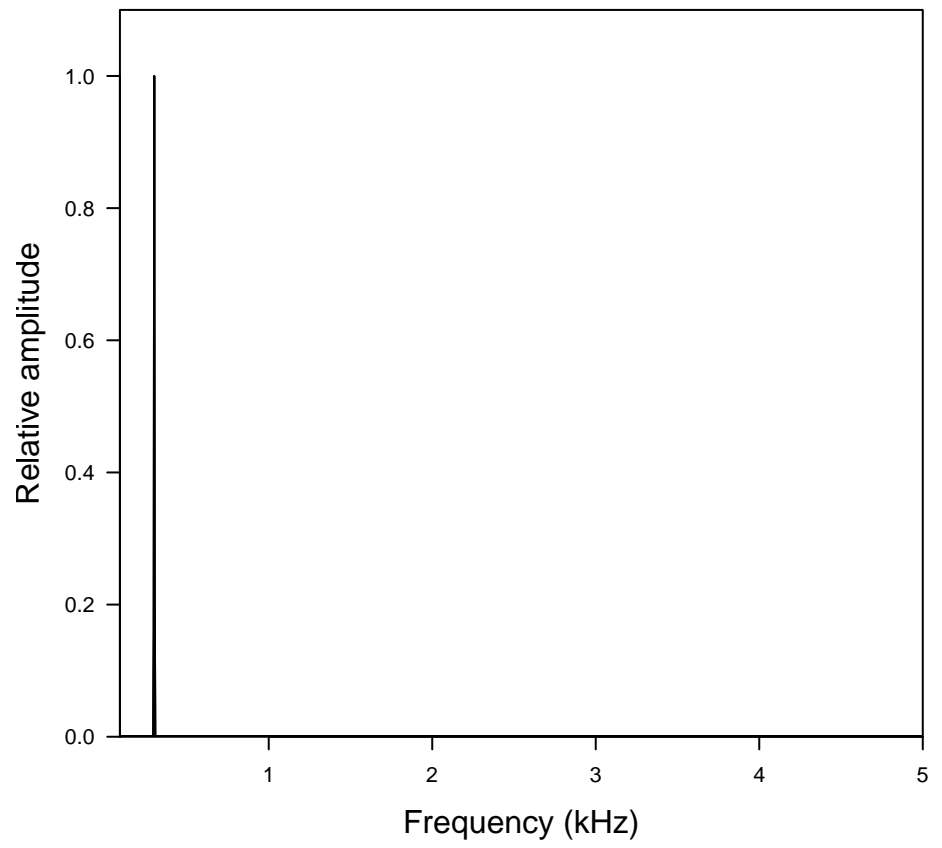

Vel. = 0.028 ; Str. = FA ; Axis = x ; Fl. accession = 10-s-79-27

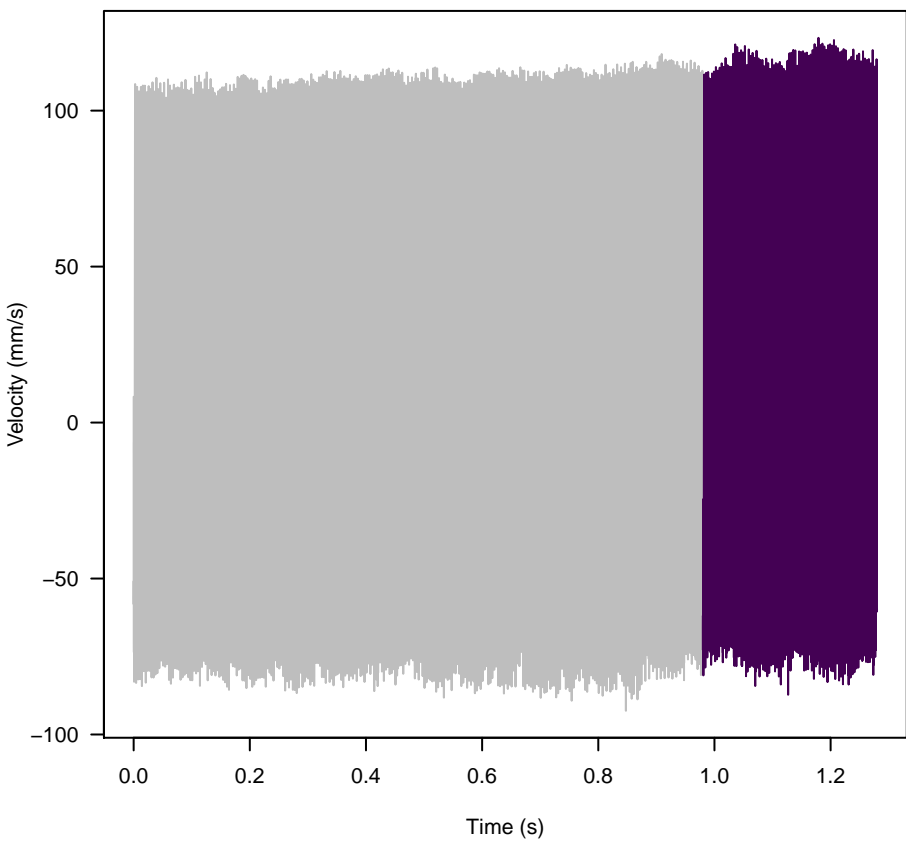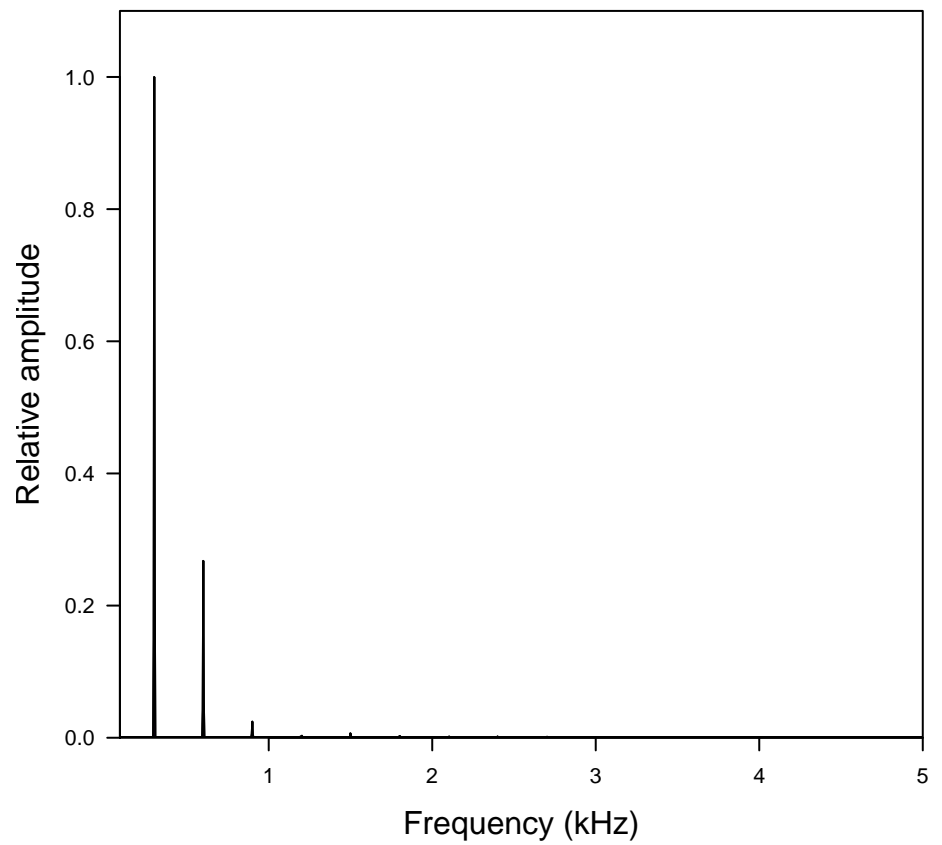

Vel. = 0.028 ; Str. = Receptacle ; Axis = x ; Fl. accession = 10-s-79-27

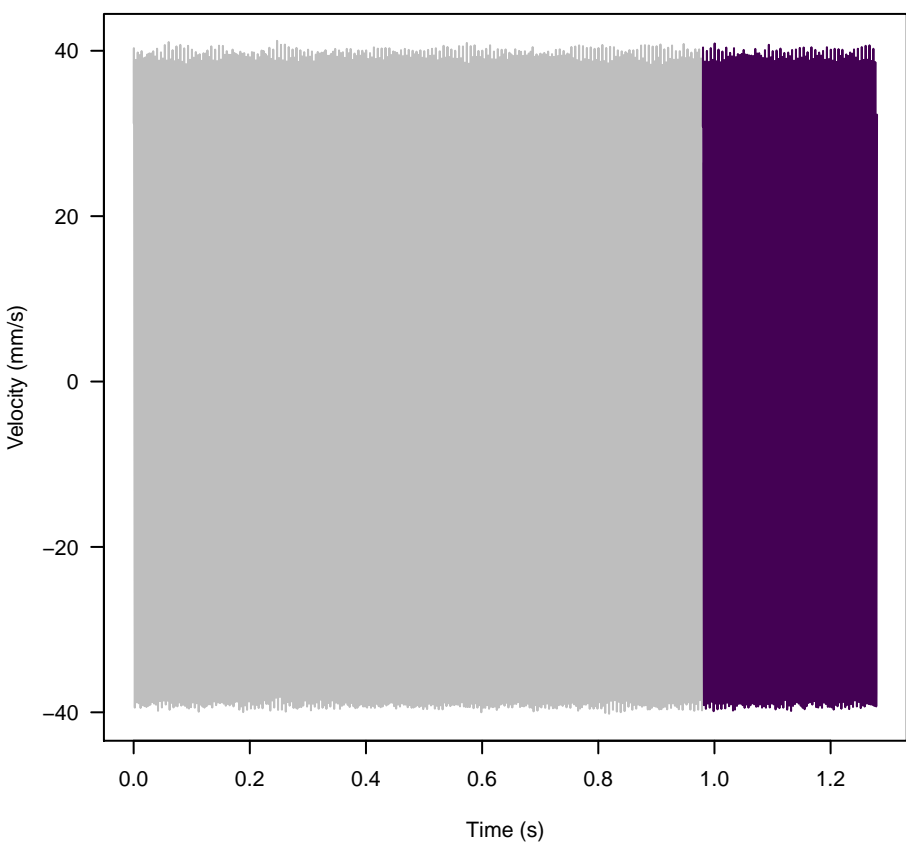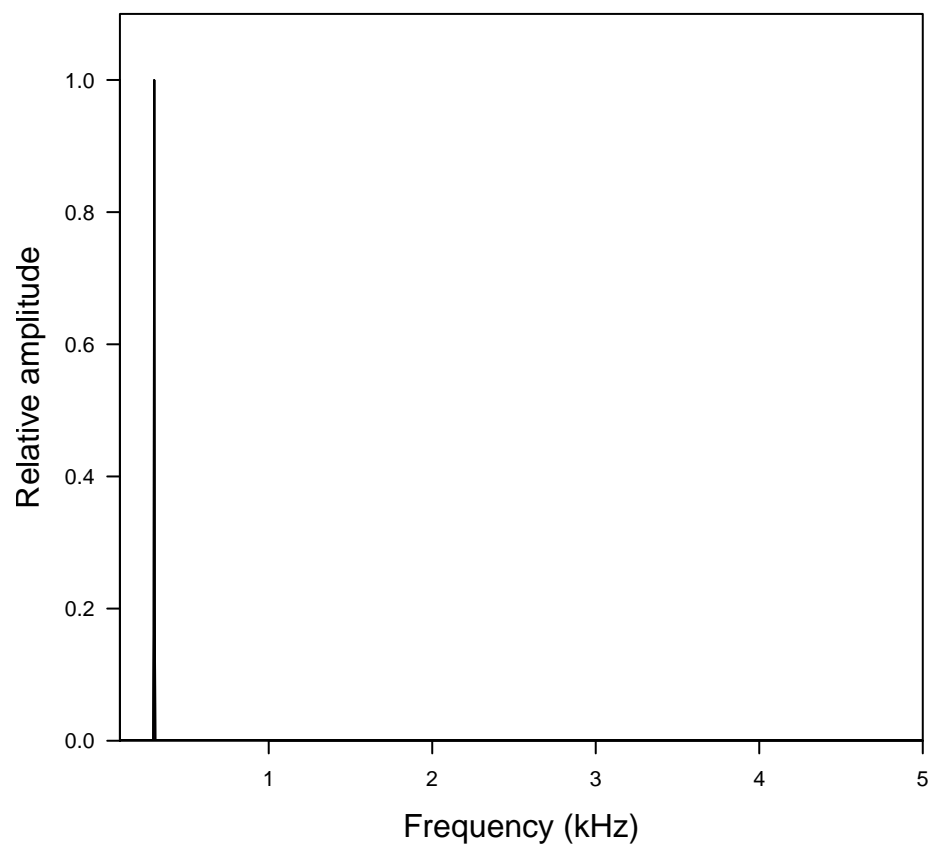

Vel. = 0.028 ; Str. = Corolla ; Axis = x ; Fl. accession = 10-s-79-27

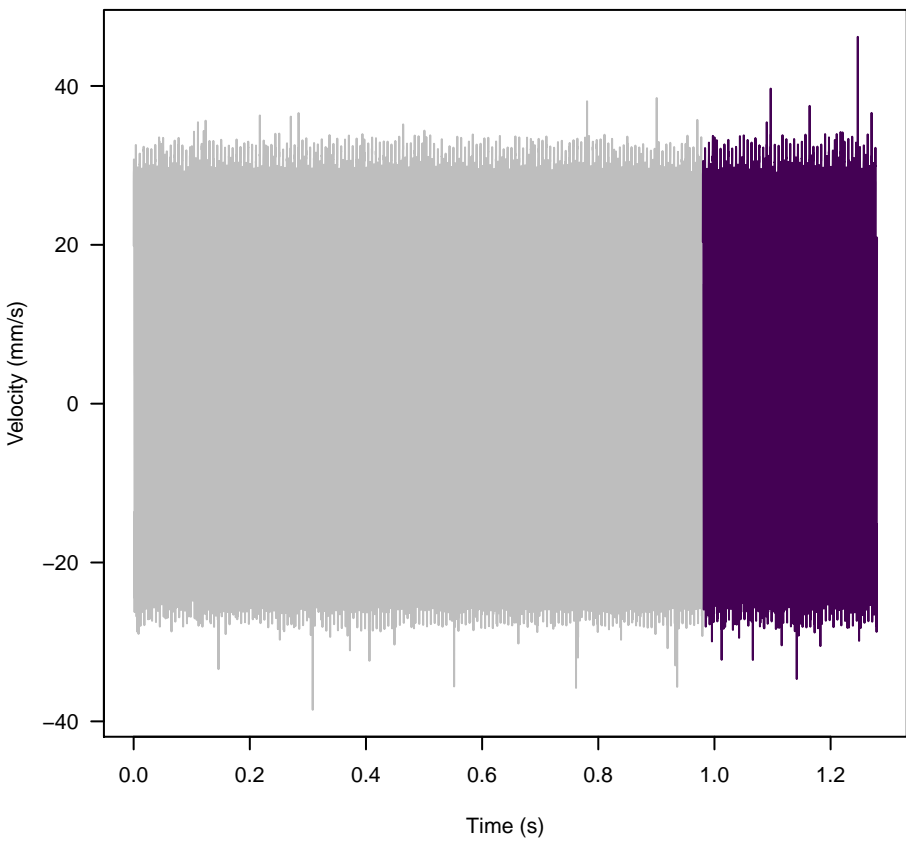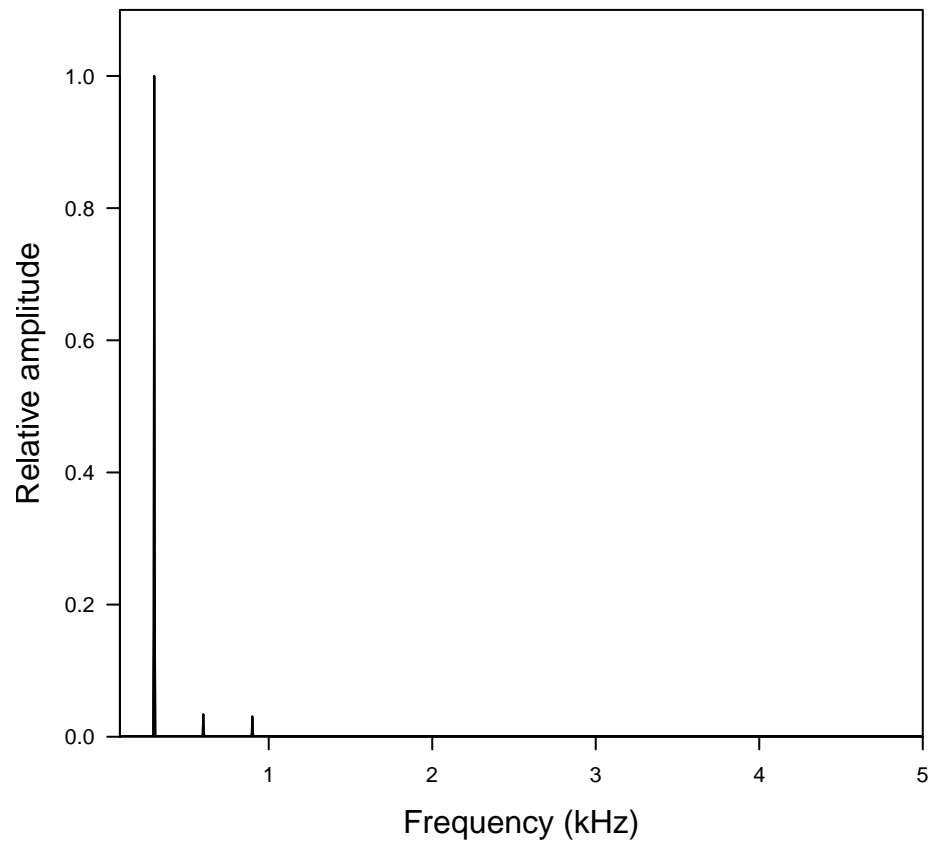

Vel. = 0.028 ; Str. = Receptacle ; Axis = x ; Fl. accession = 10-s-79-27

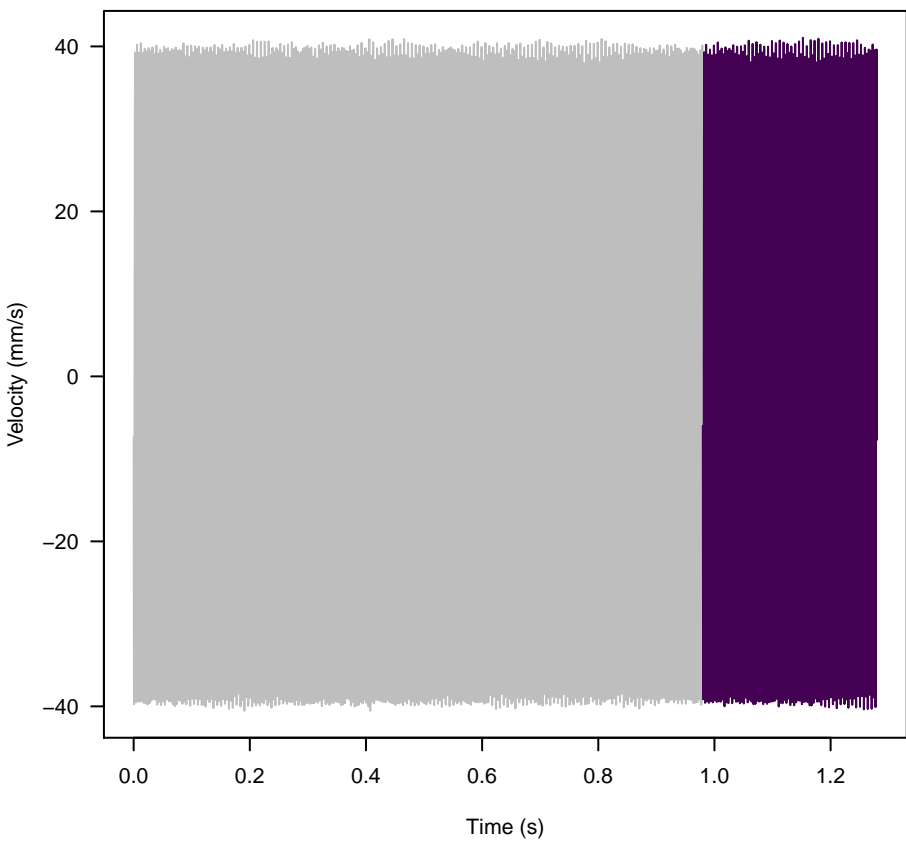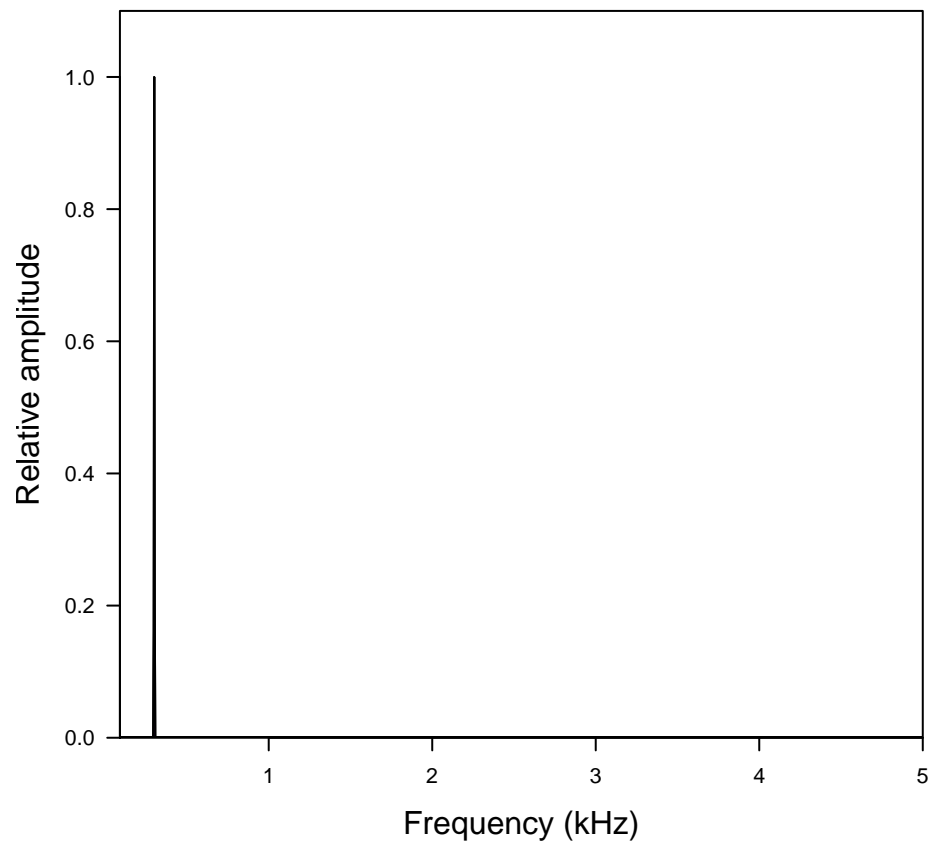

Vel. = 0.057 ; Str. = Corolla ; Axis = x ; Fl. accession = 10-s-79-27

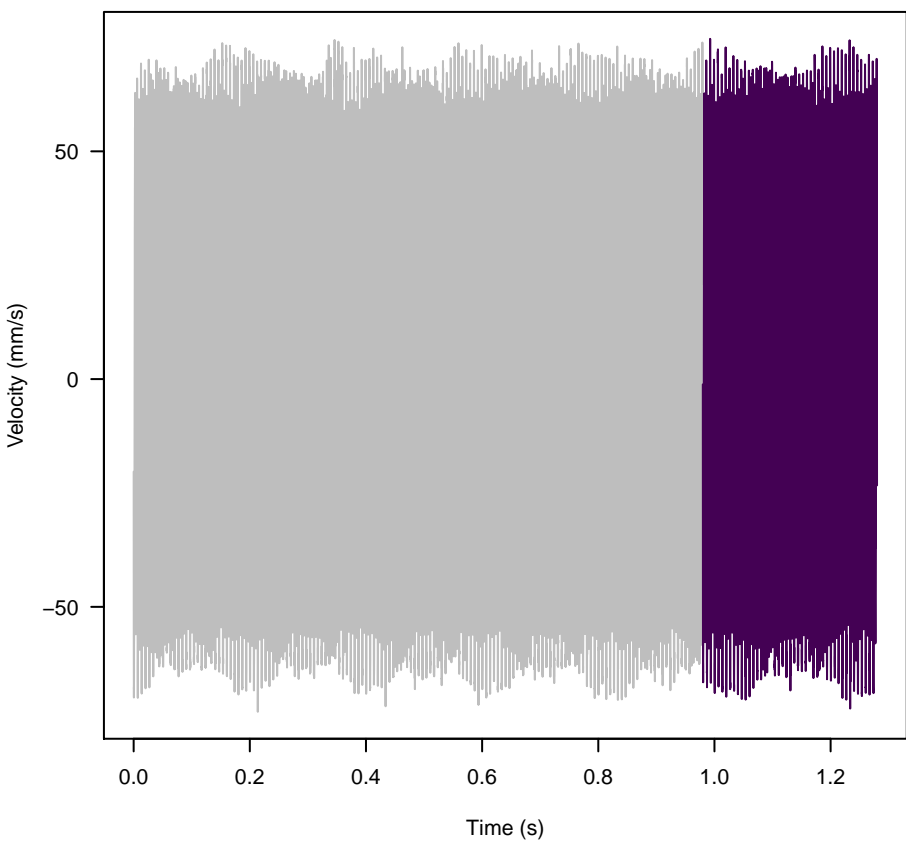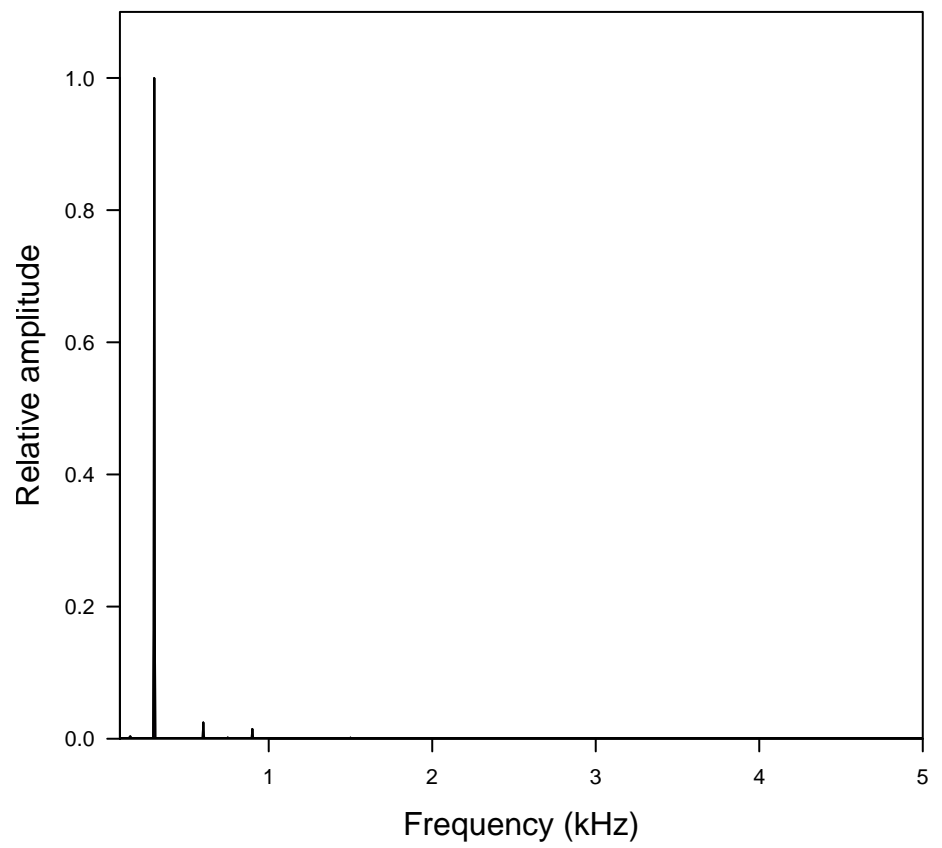

Vel. = 0.057 ; Str. = Receptacle ; Axis = x ; Fl. accession = 10-s-79-27

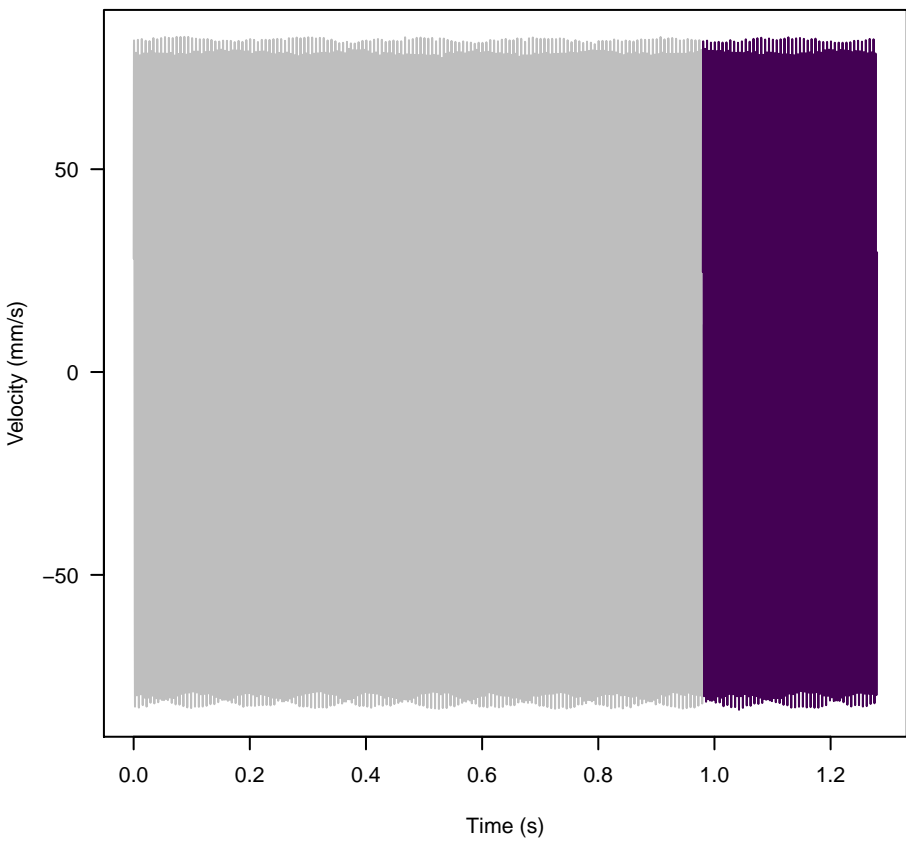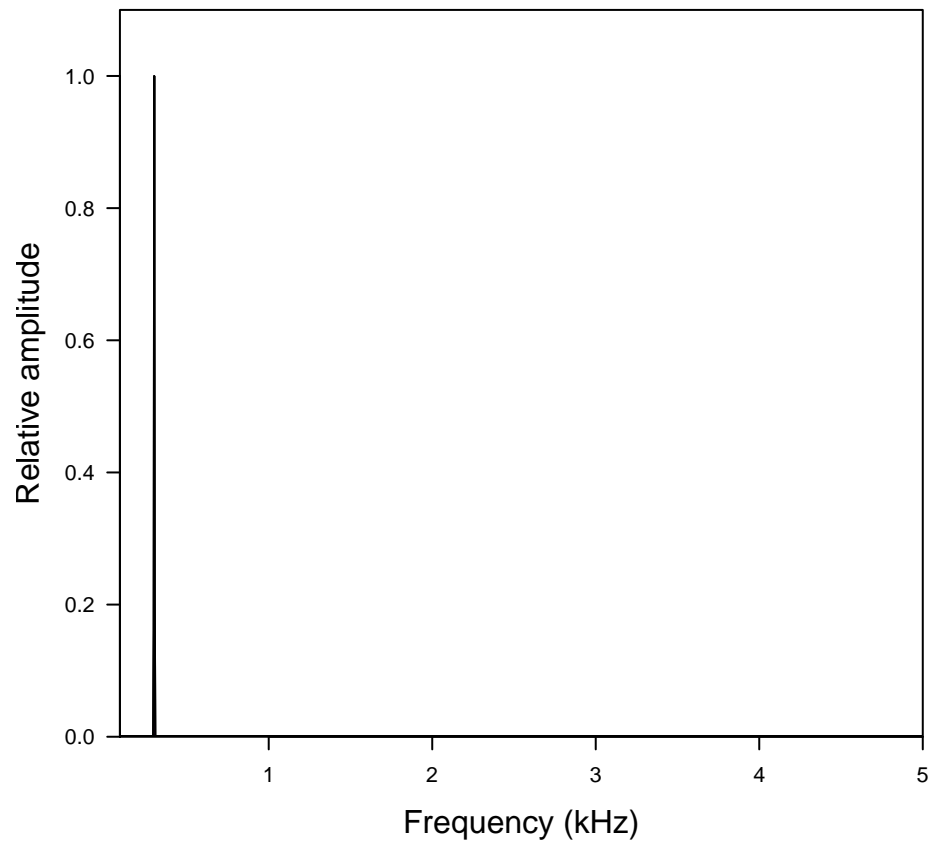

Vel. = 0.057 ; Str. = FA ; Axis = x ; Fl. accession = 10-s-79-27

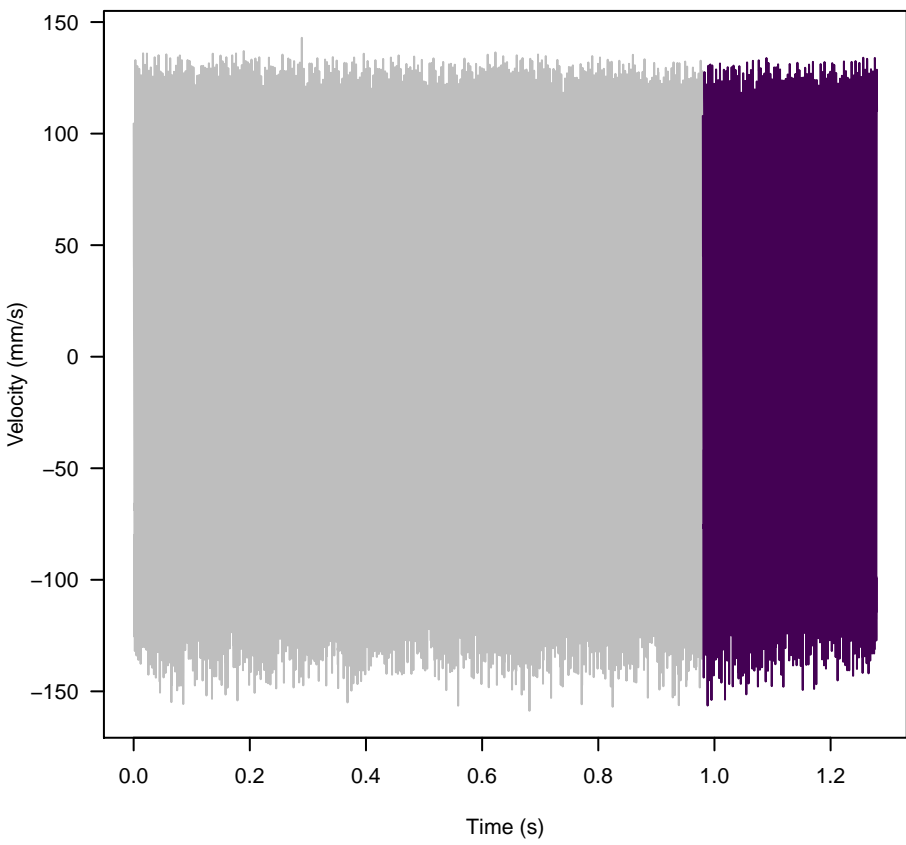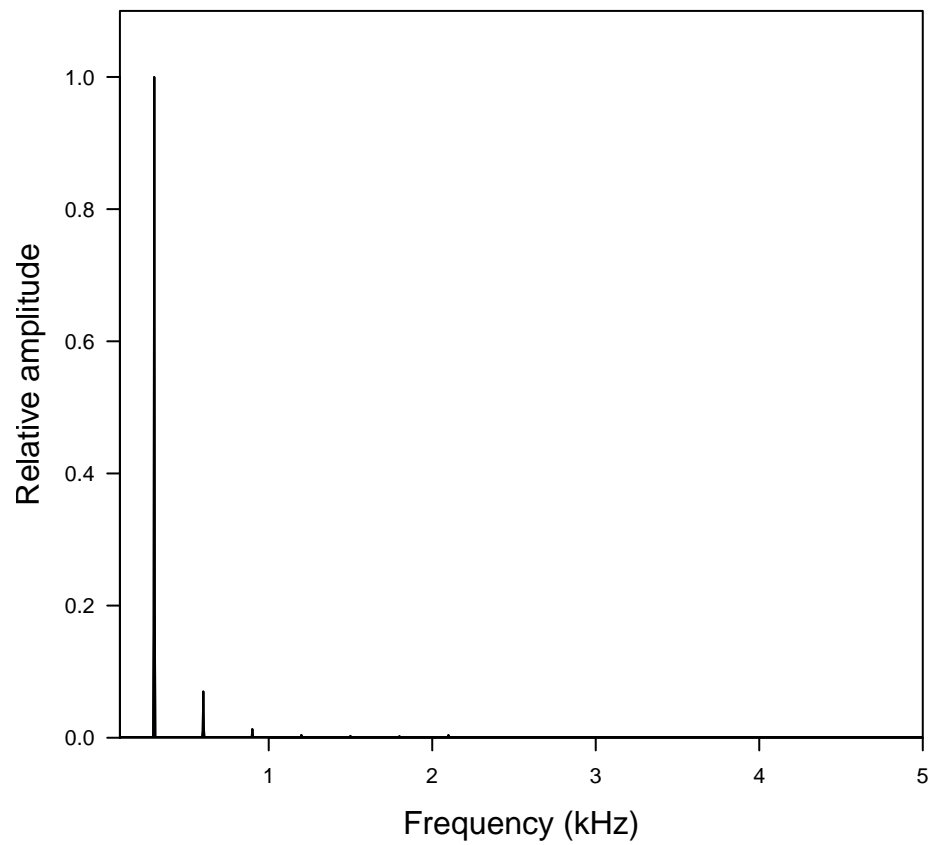

Vel. = 0.057 ; Str. = Receptacle ; Axis = x ; Fl. accession = 10-s-79-27

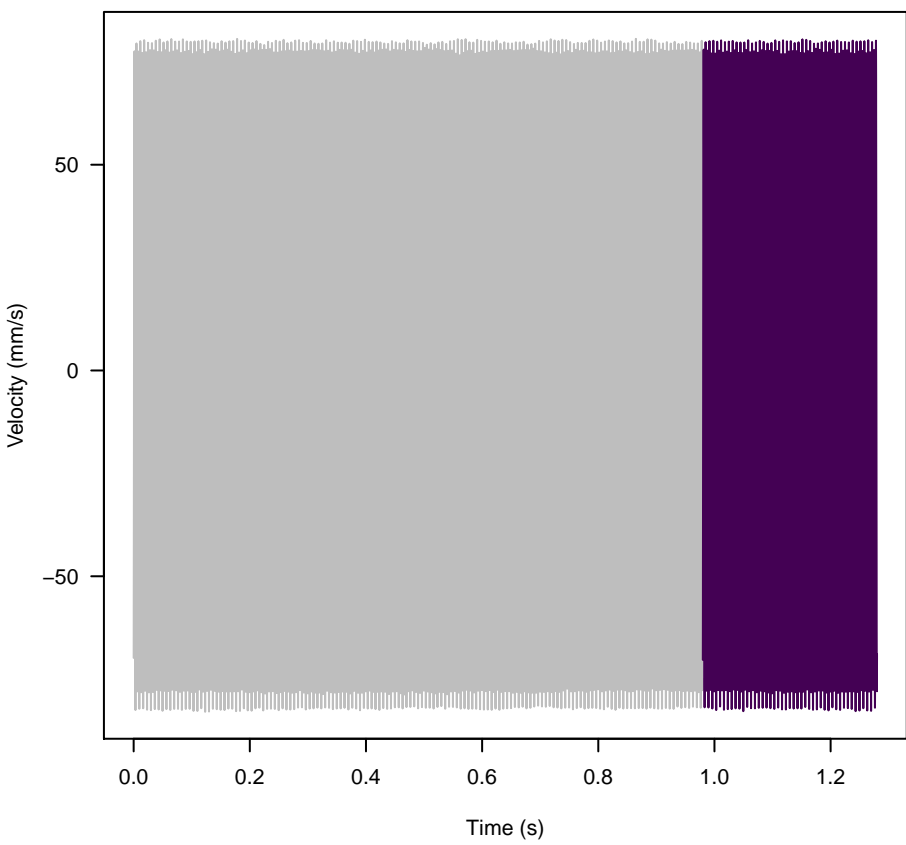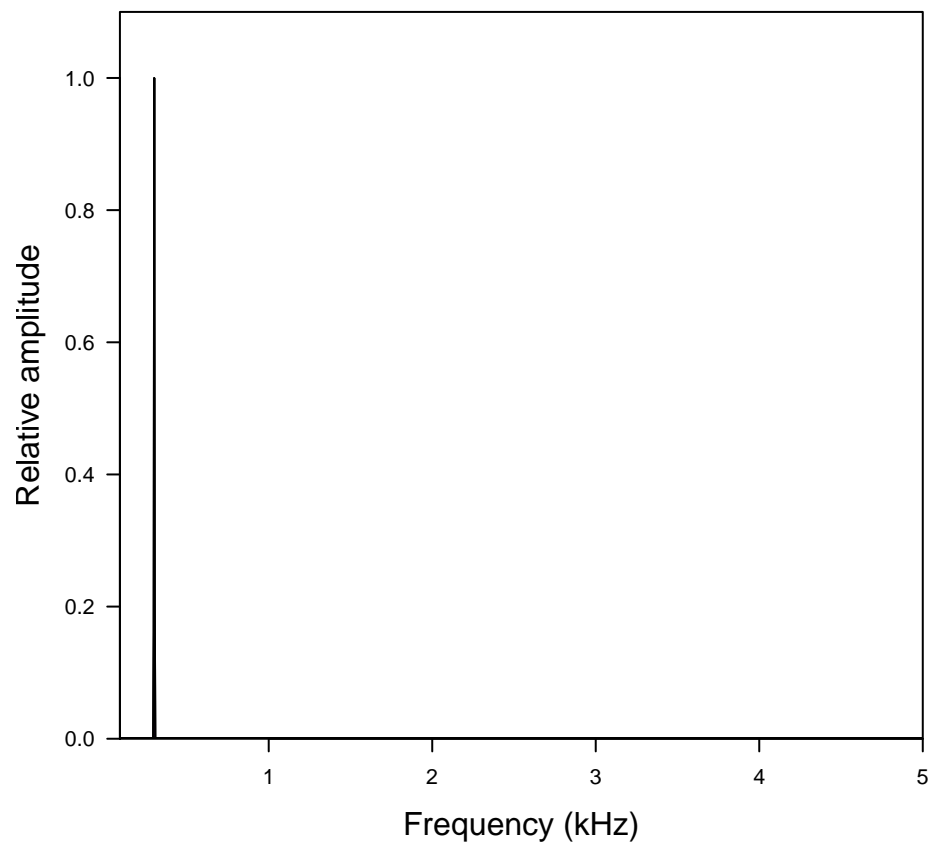

Vel. = 0.057 ; Str. = PA ; Axis = x ; Fl. accession = 10-s-79-27

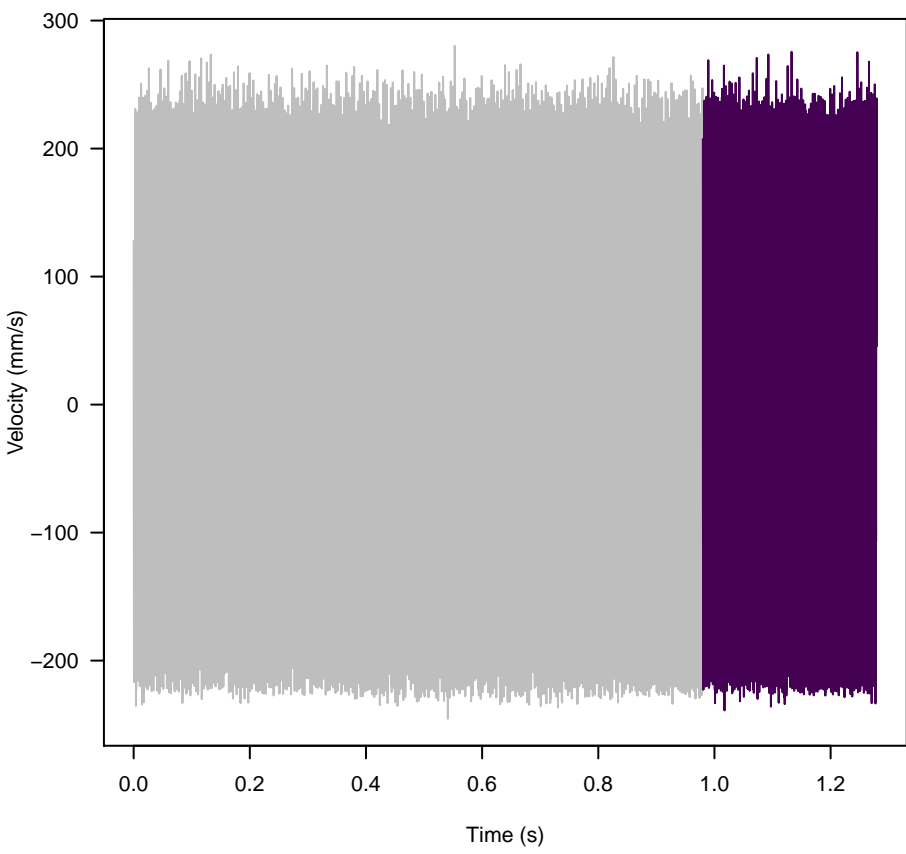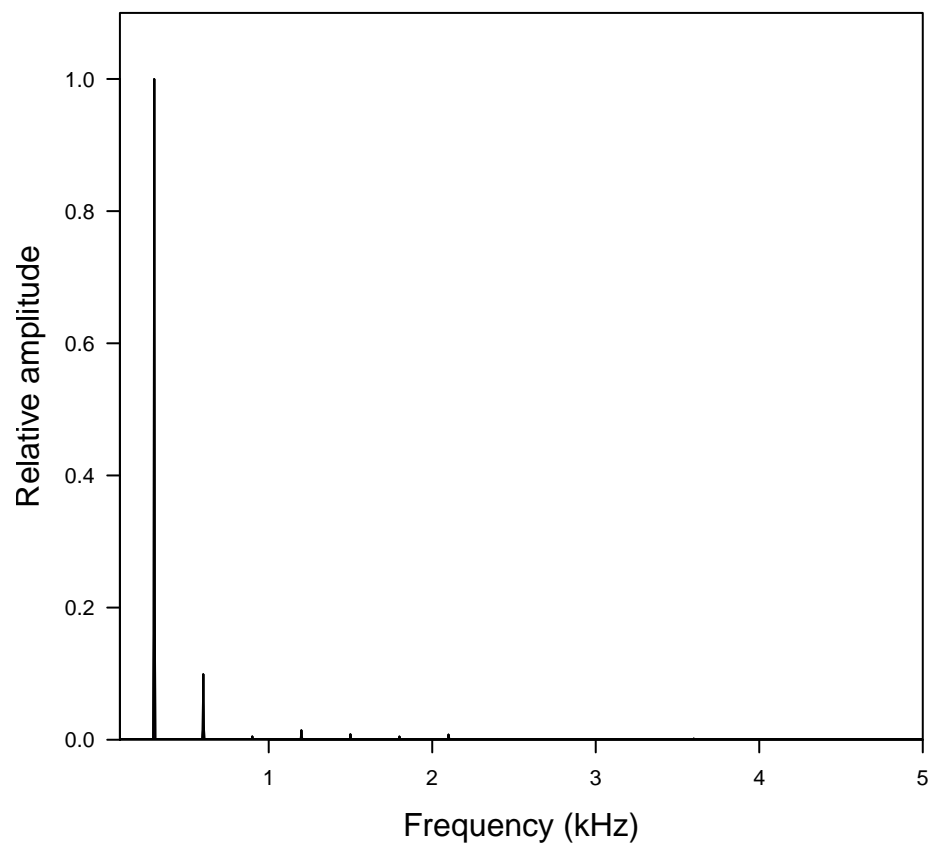

Vel. = 0.057 ; Str. = Receptacle ; Axis = x ; Fl. accession = 10-s-79-27

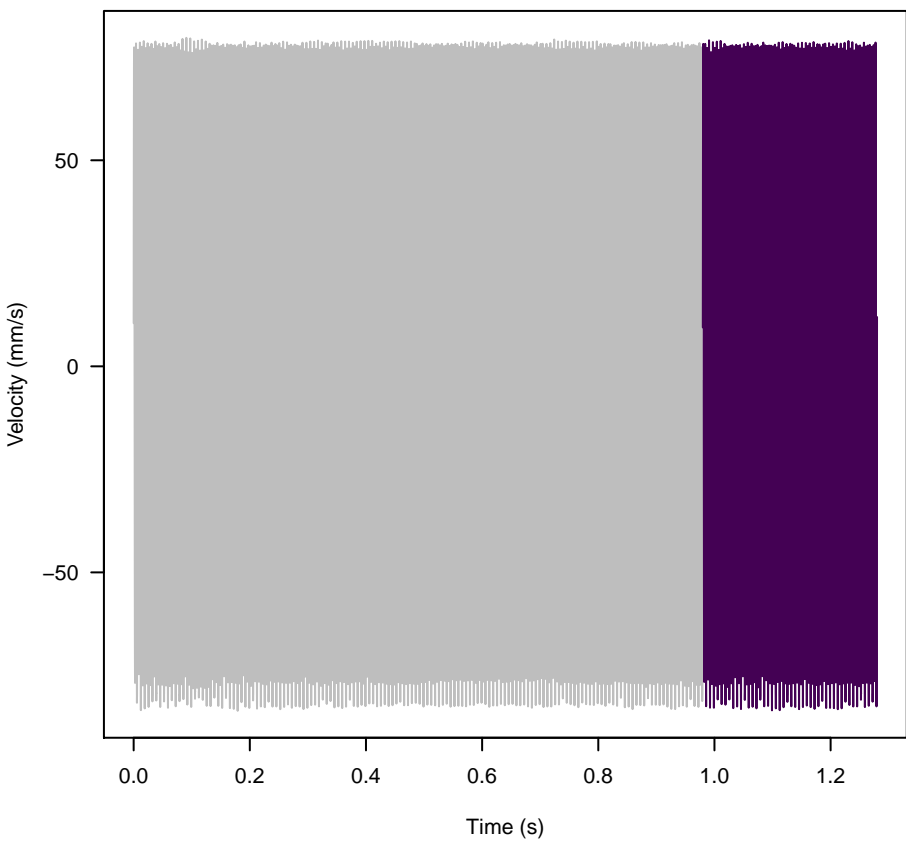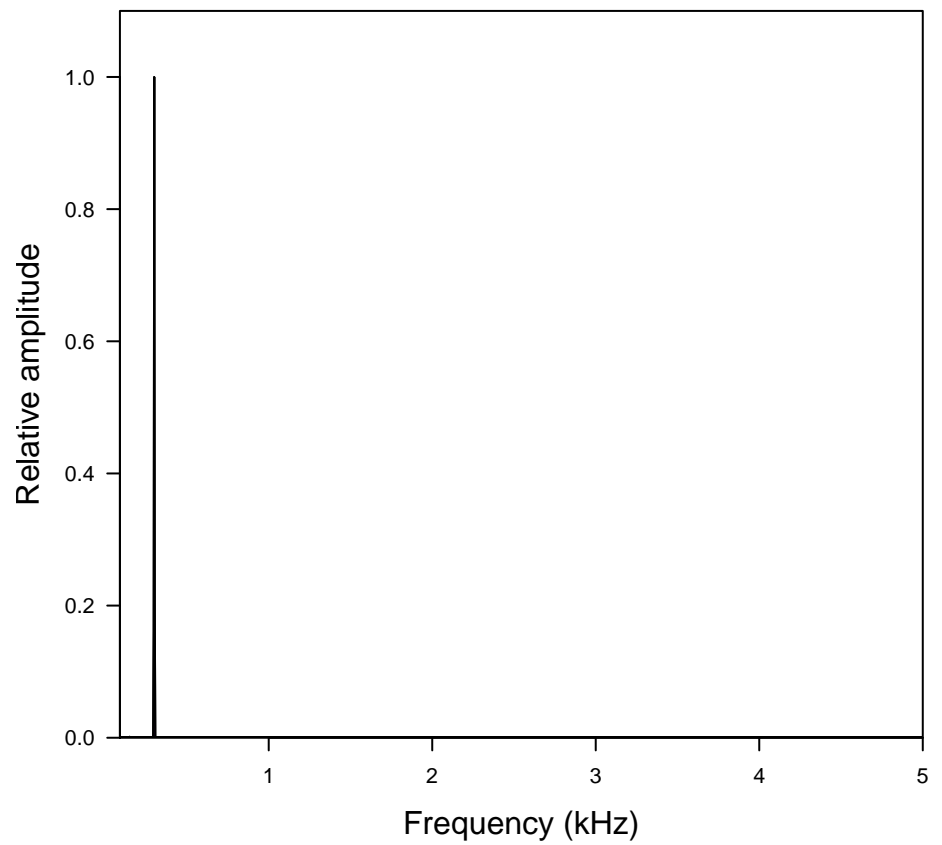

Vel. = 0.057 ; Str. = Corolla ; Axis = z ; Fl. accession = 10-s-79-27

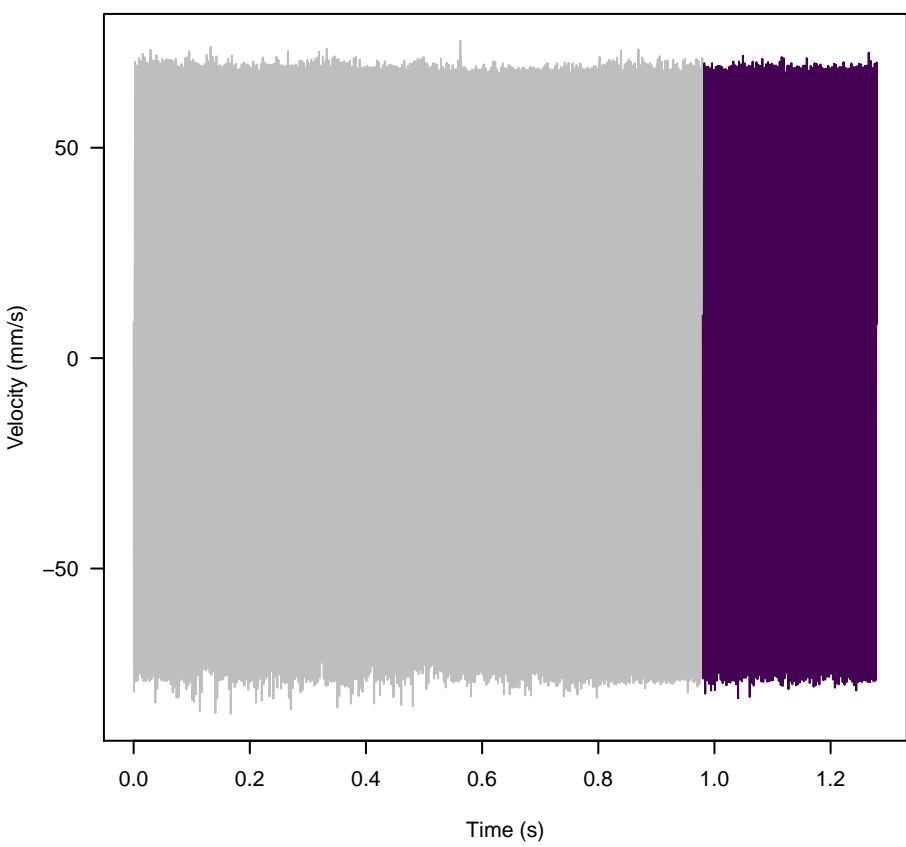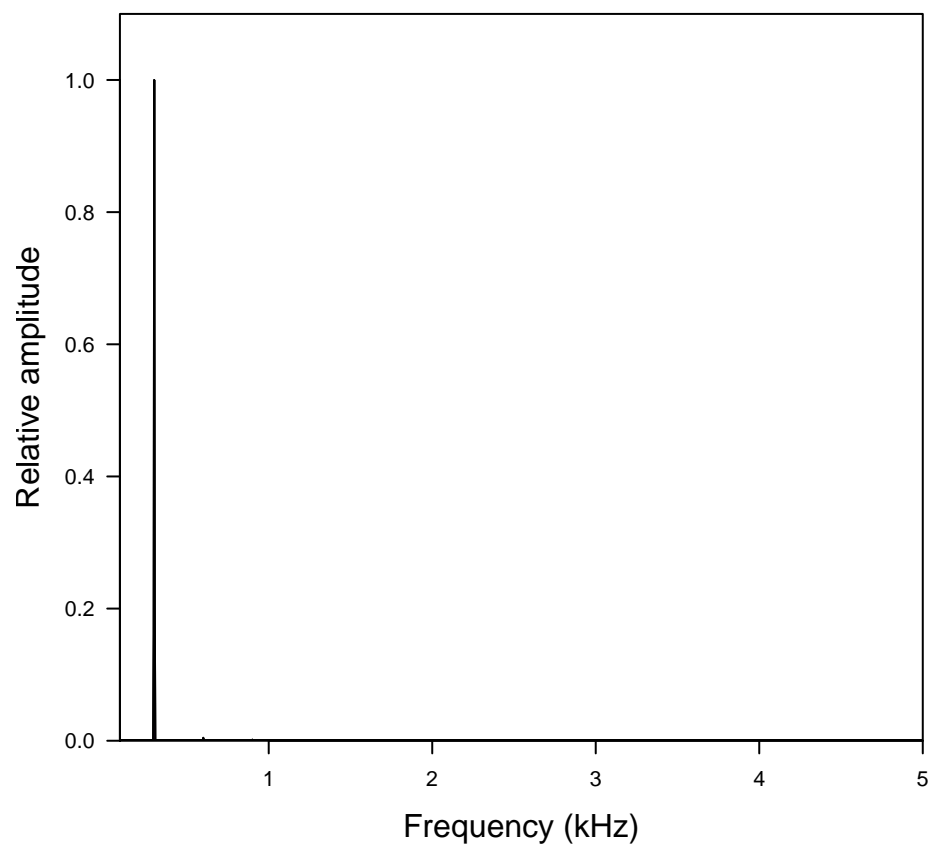

Vel. = 0.057 ; Str. = Receptacle ; Axis = z ; Fl. accession = 10-s-79-27

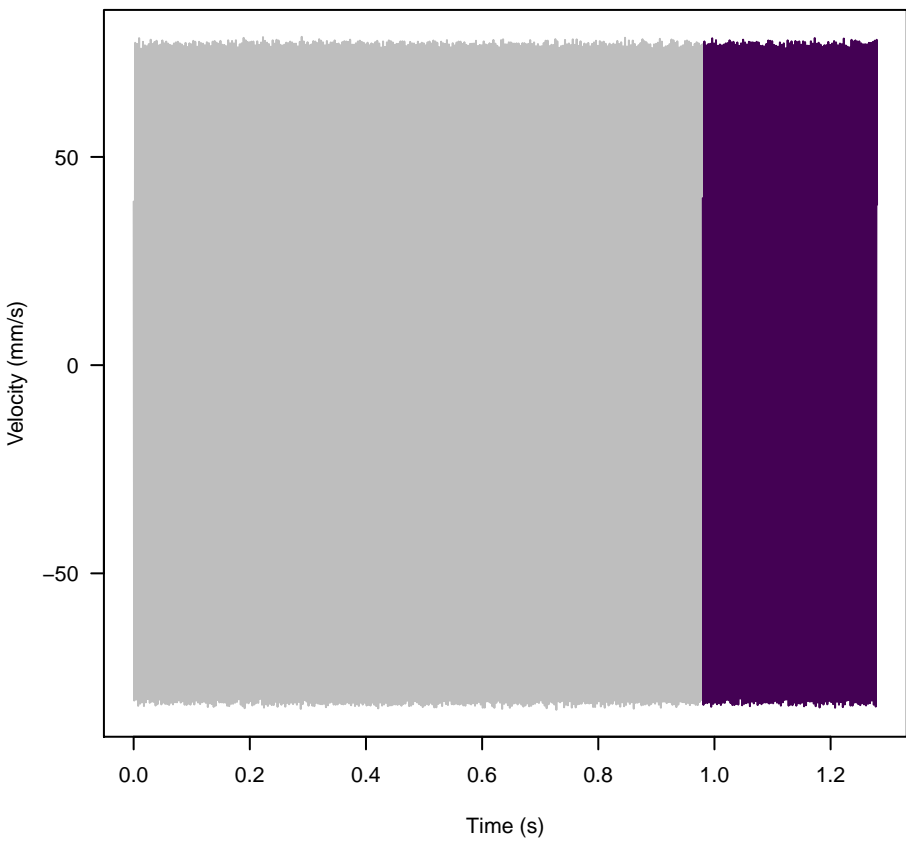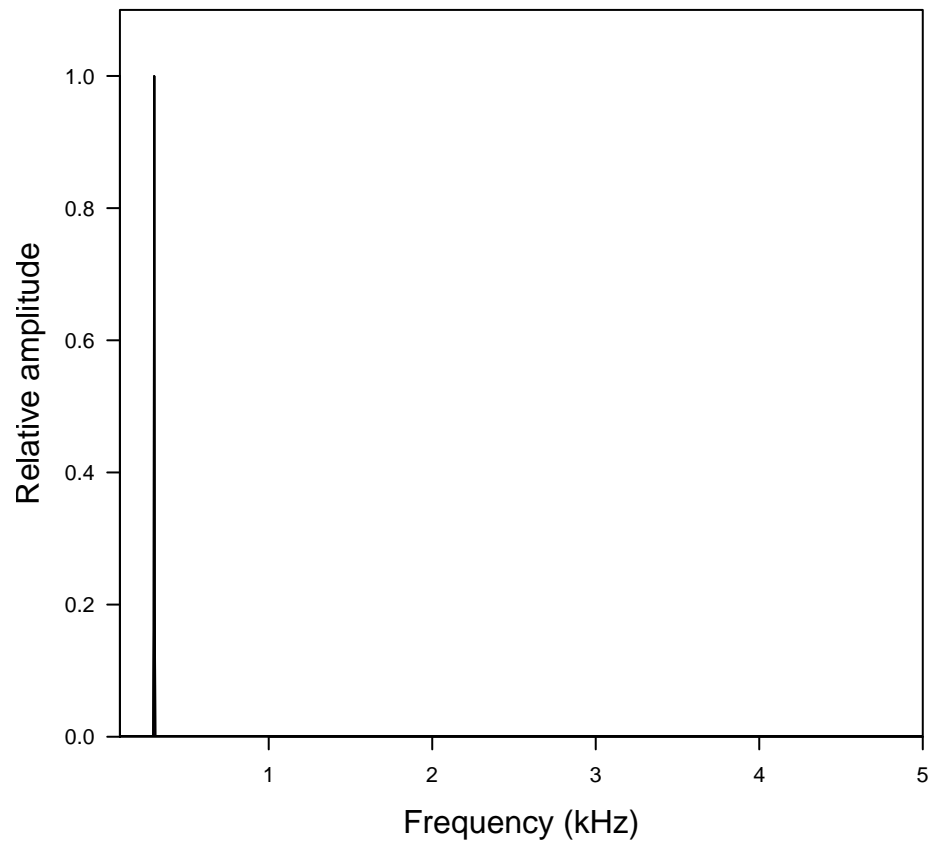

Vel. = 0.057 ; Str. = FA ; Axis = z ; Fl. accession = 10-s-79-27

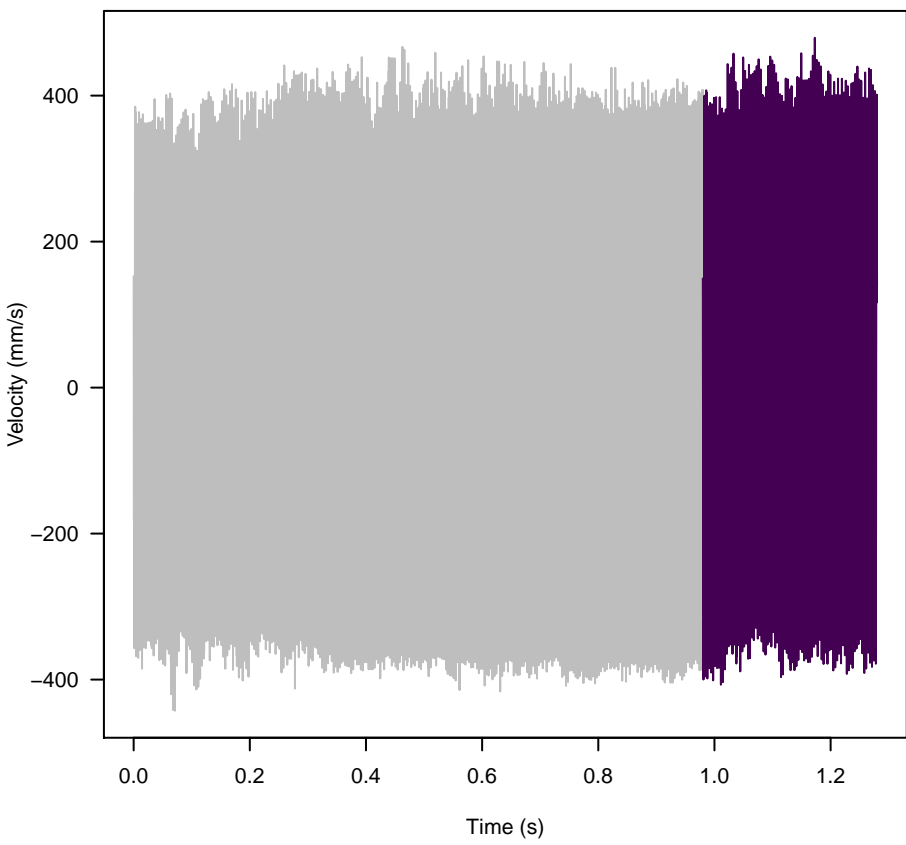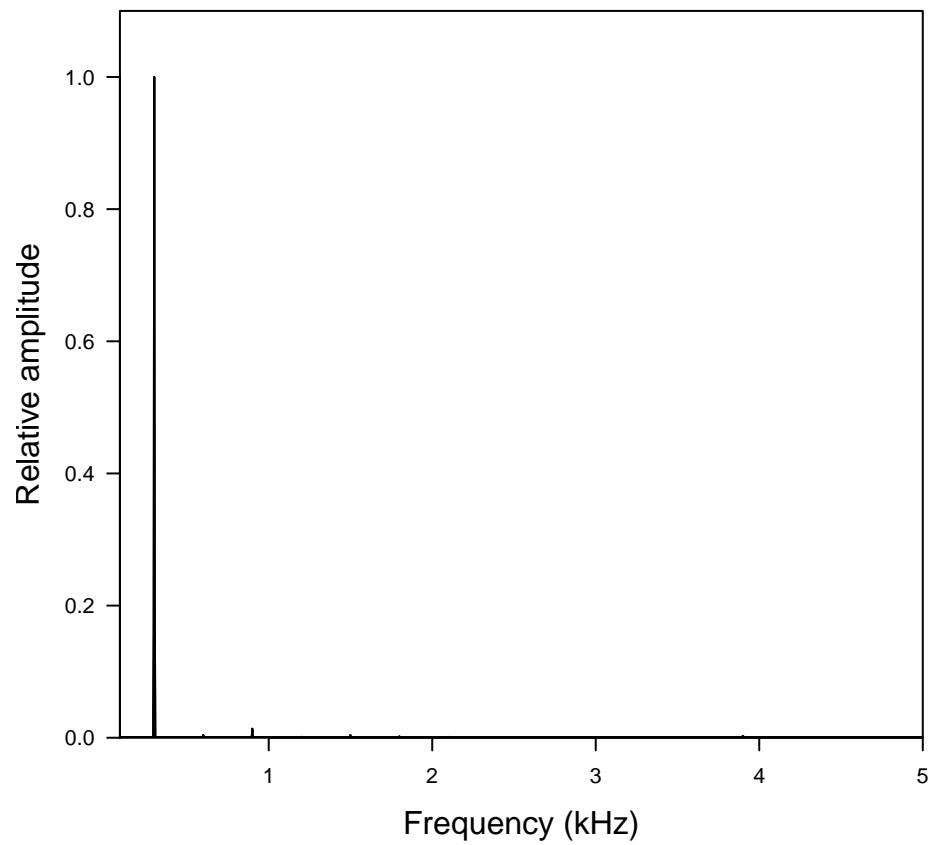

Vel. = 0.057 ; Str. = Receptacle ; Axis = z ; Fl. accession = 10-s-79-27

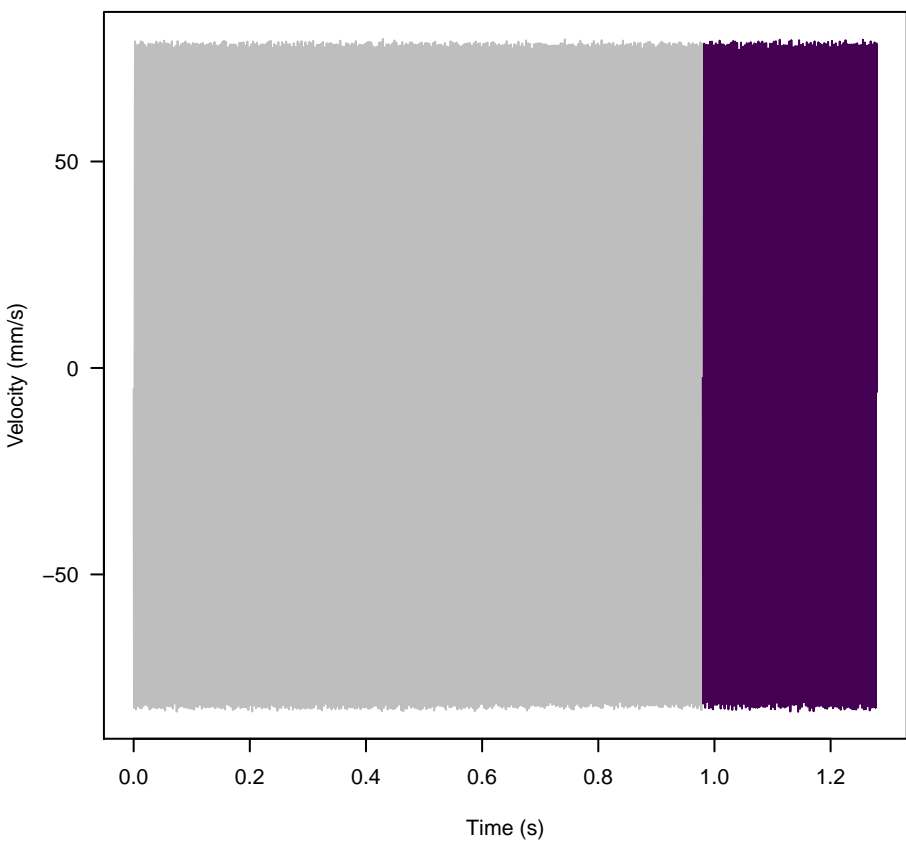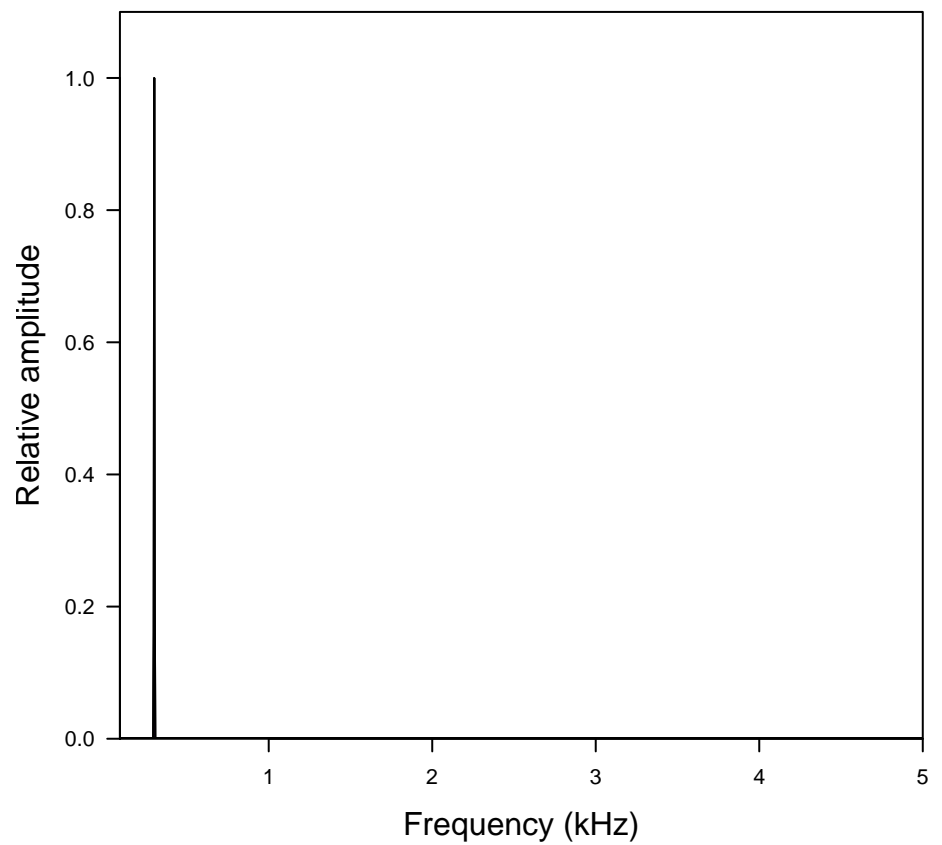

Vel. = 0.057 ; Str. = PA ; Axis = z ; Fl. accession = 10-s-79-27

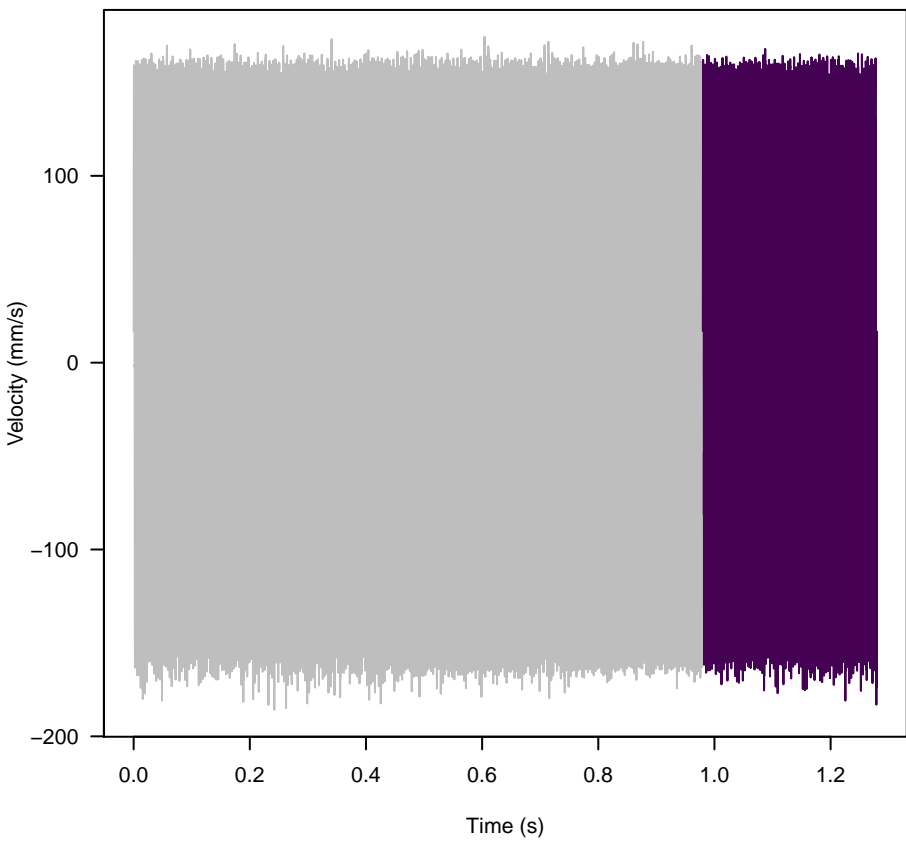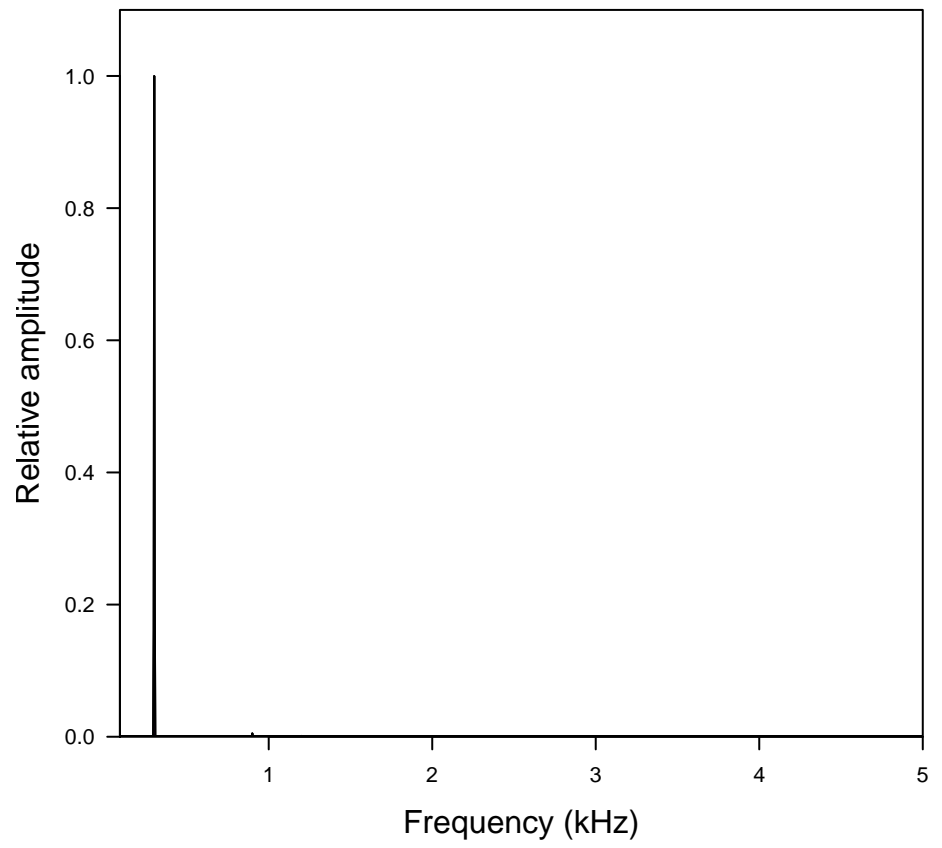

Vel. = 0.057 ; Str. = Receptacle ; Axis = z ; Fl. accession = 10-s-79-27

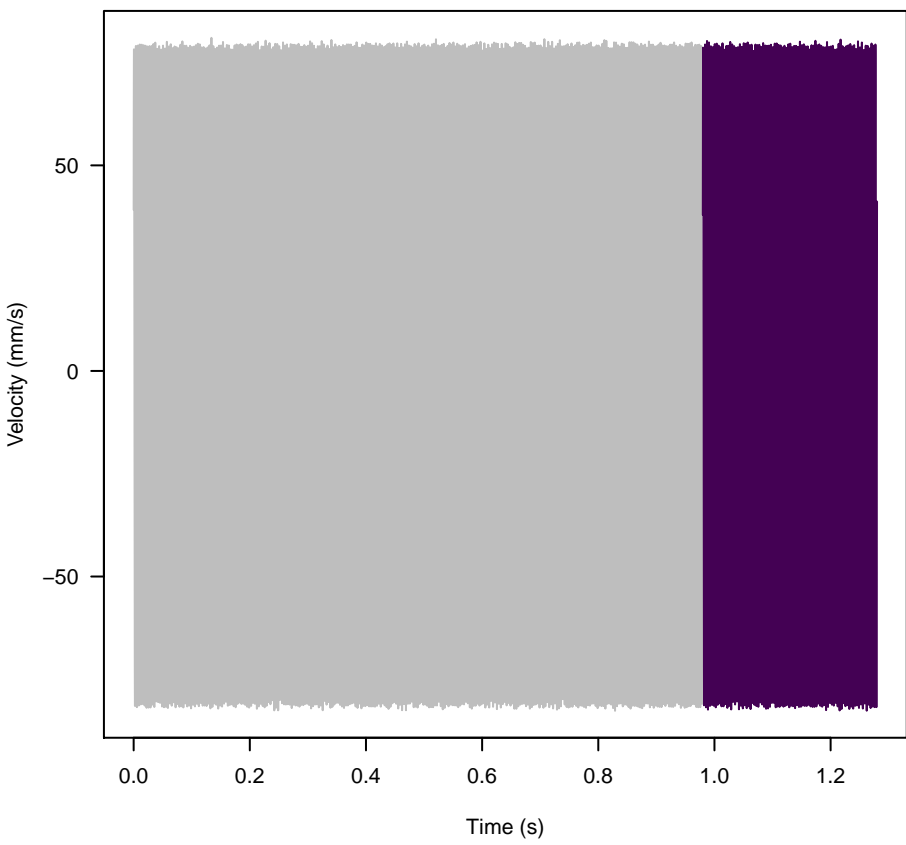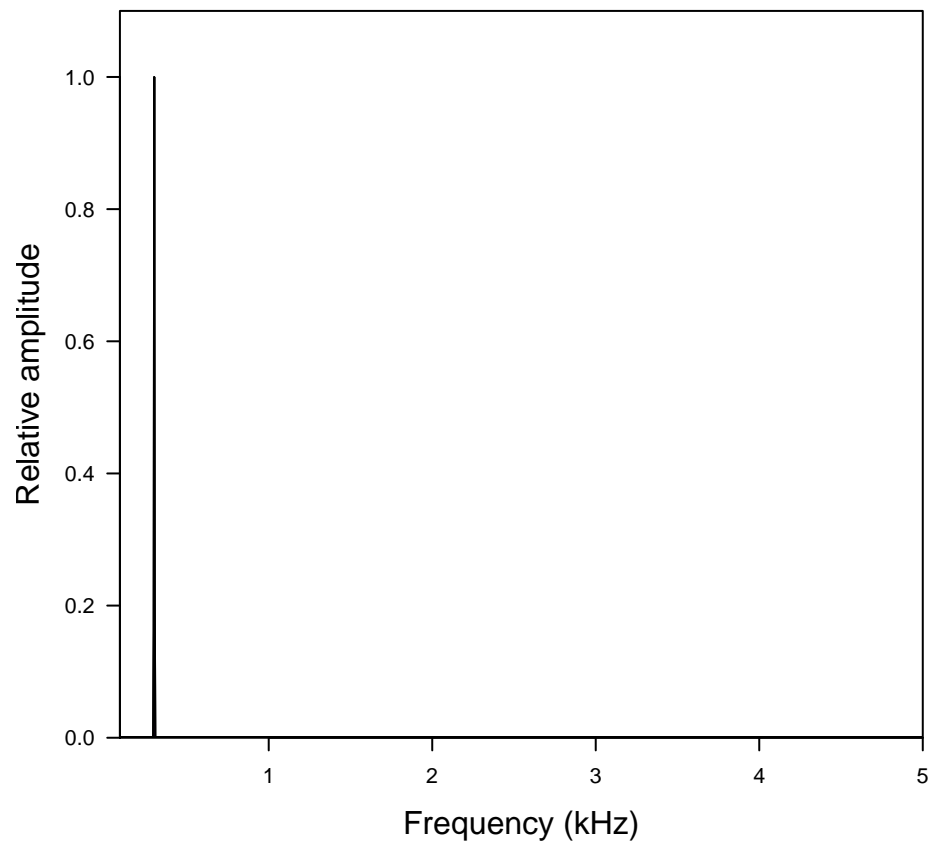

Vel. = 0.028 ; Str. = PA ; Axis = z ; Fl. accession = 10-s-79-27

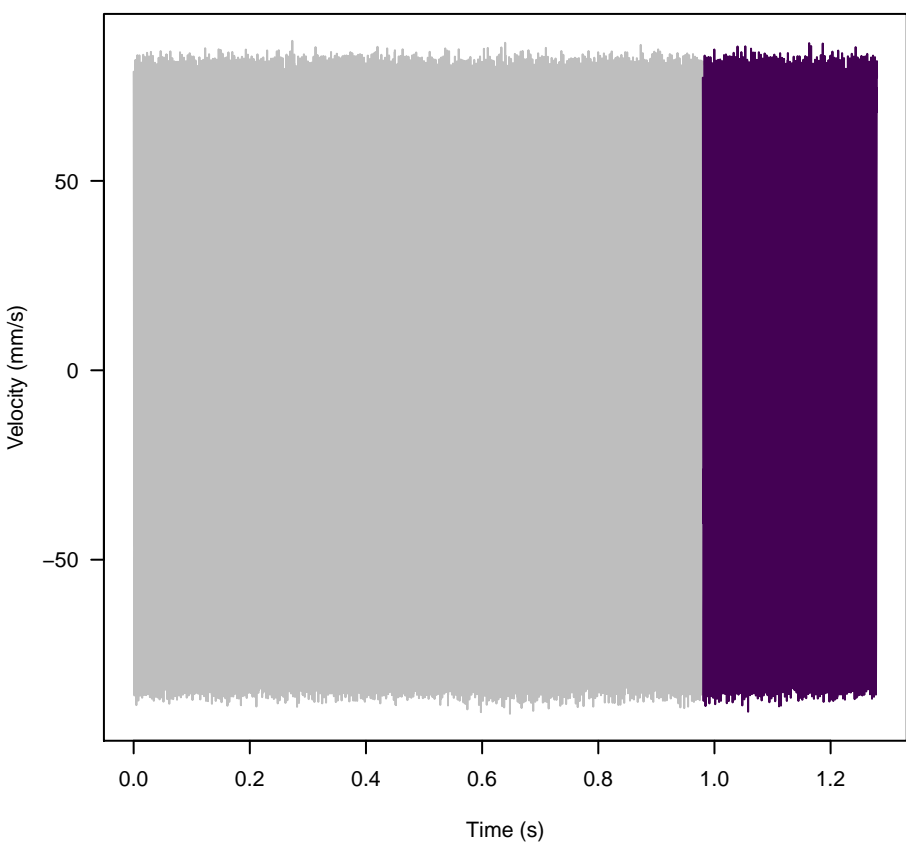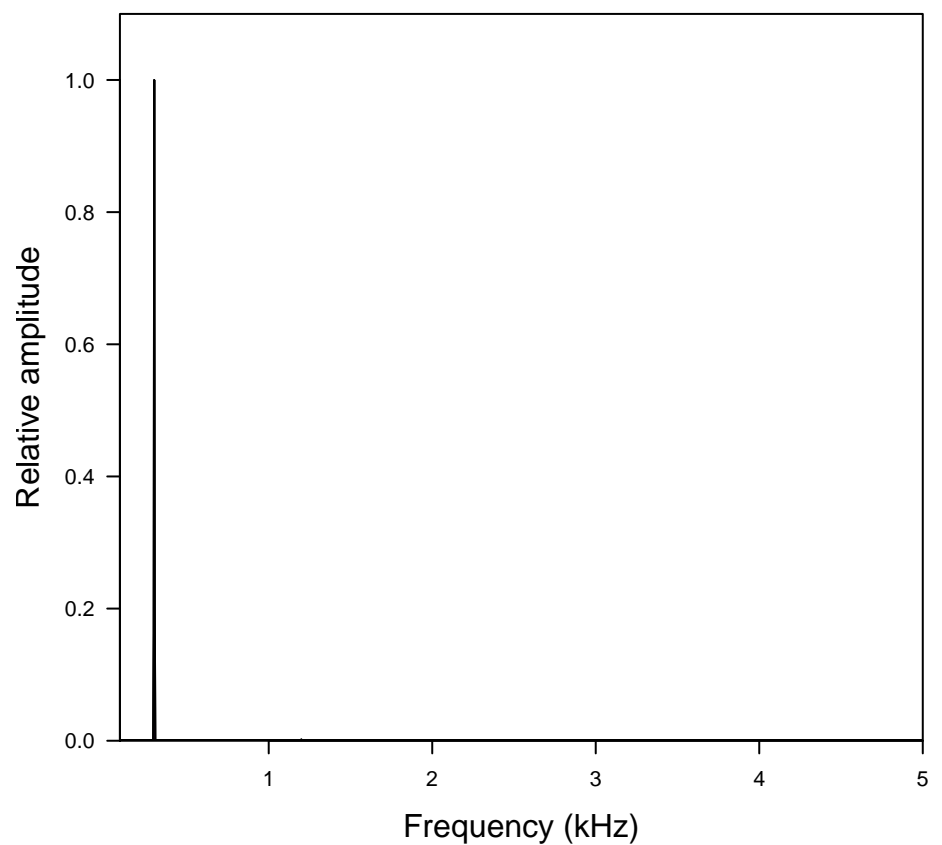



Vel. = 0.028 ; Str. = Receptacle ; Axis = z ; Fl. accession = 10-s-79-27

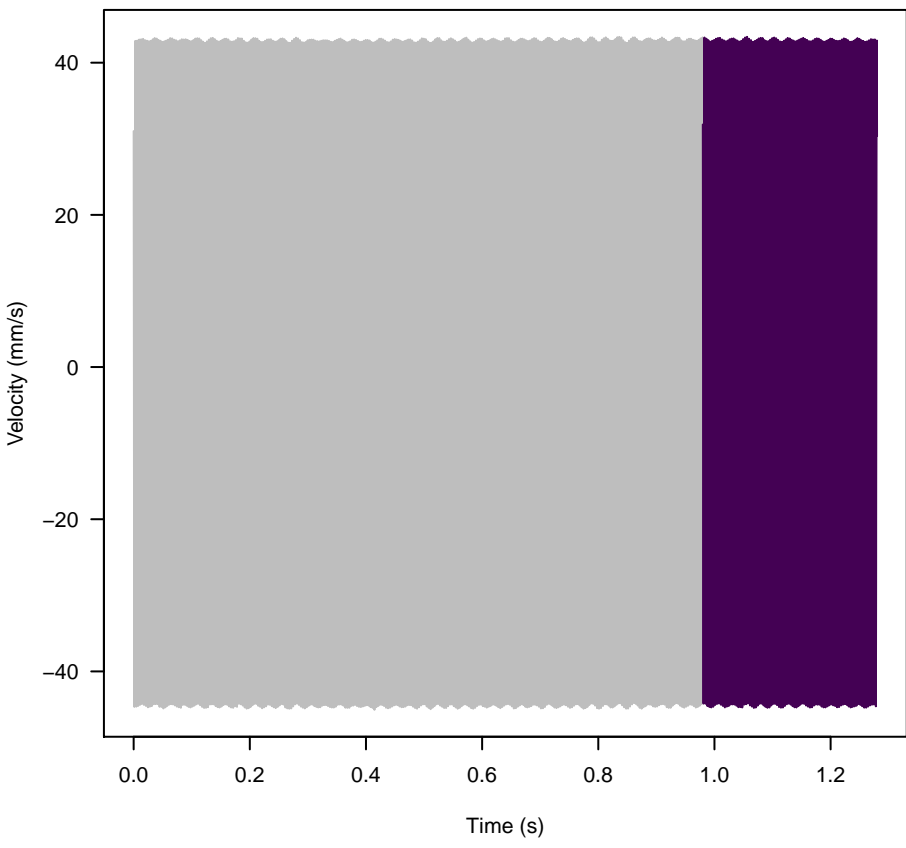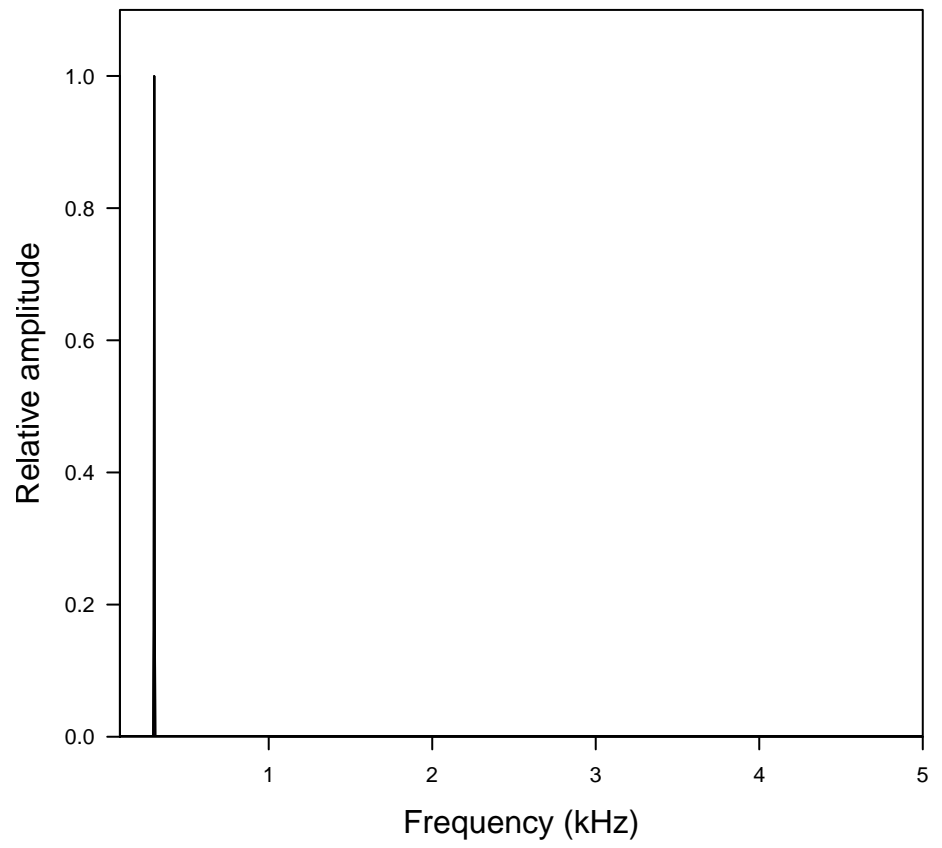

Vel. = 0.028 ; Str. = FA ; Axis = z ; Fl. accession = 10-s-79-27

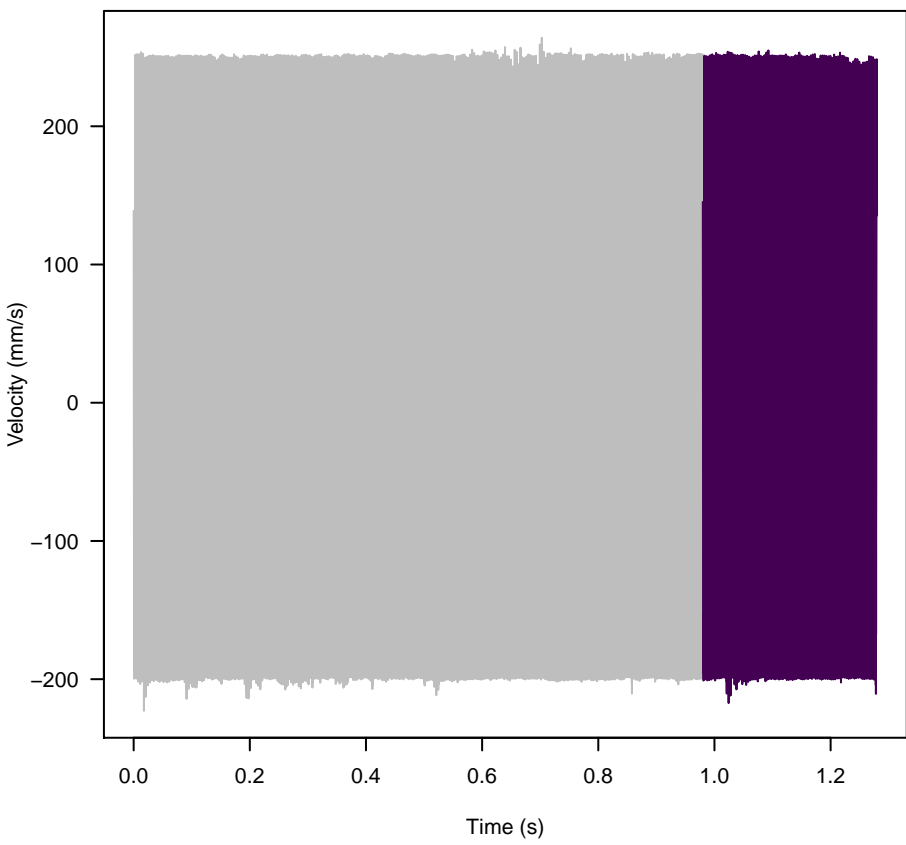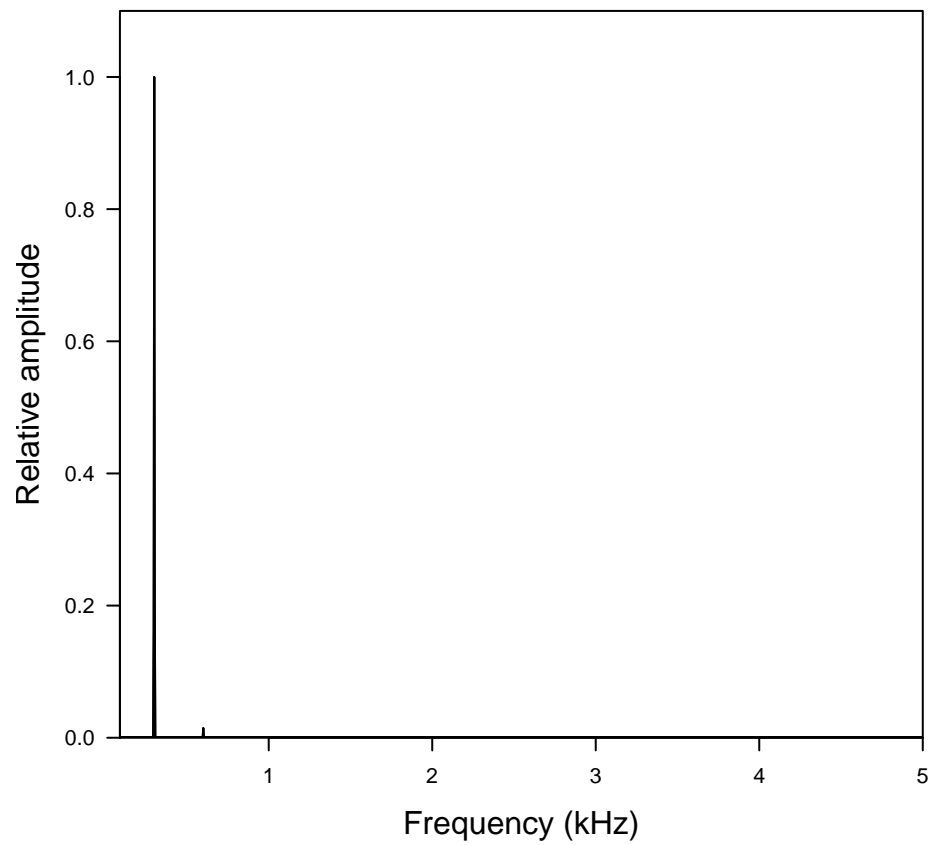

Vel. = 0.028 ; Str. = Receptacle ; Axis = z ; Fl. accession = 10-s-79-27

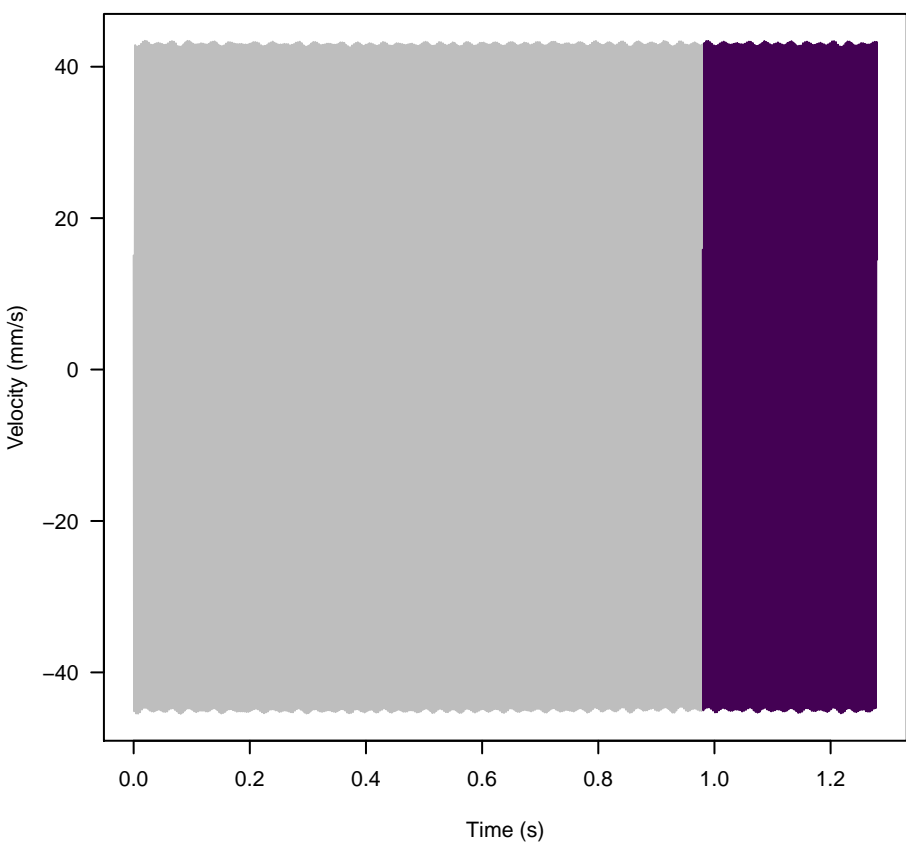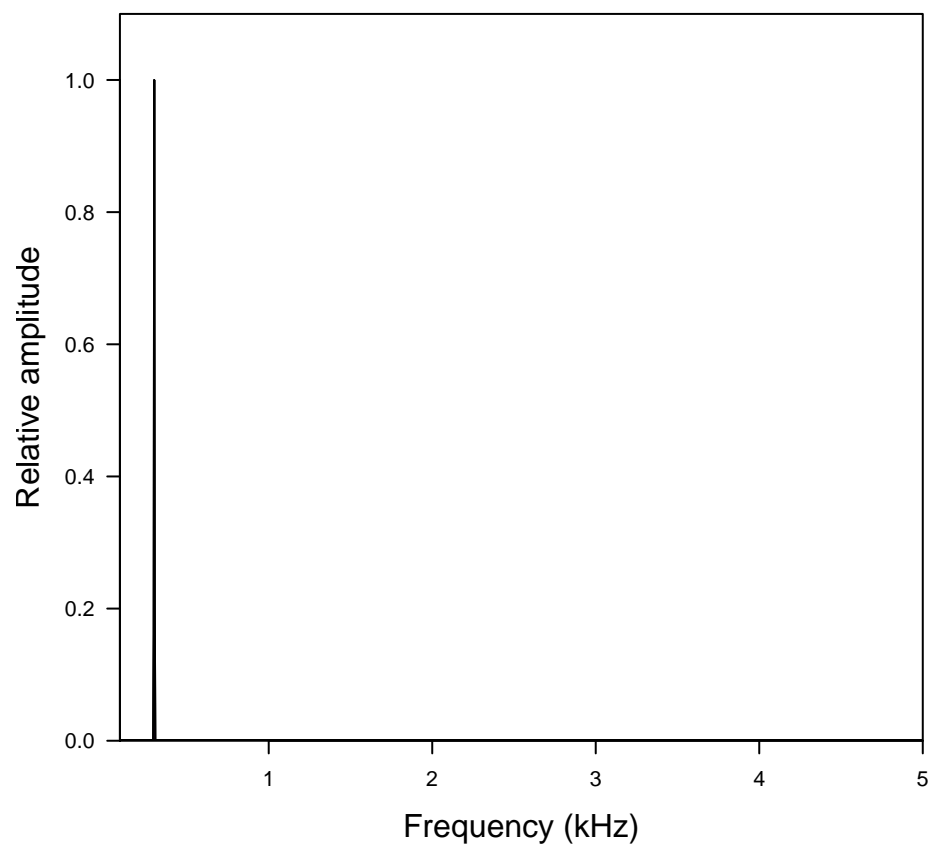

Vel. = 0.028 ; Str. = Corolla ; Axis = z ; Fl. accession = 10-s-79-27

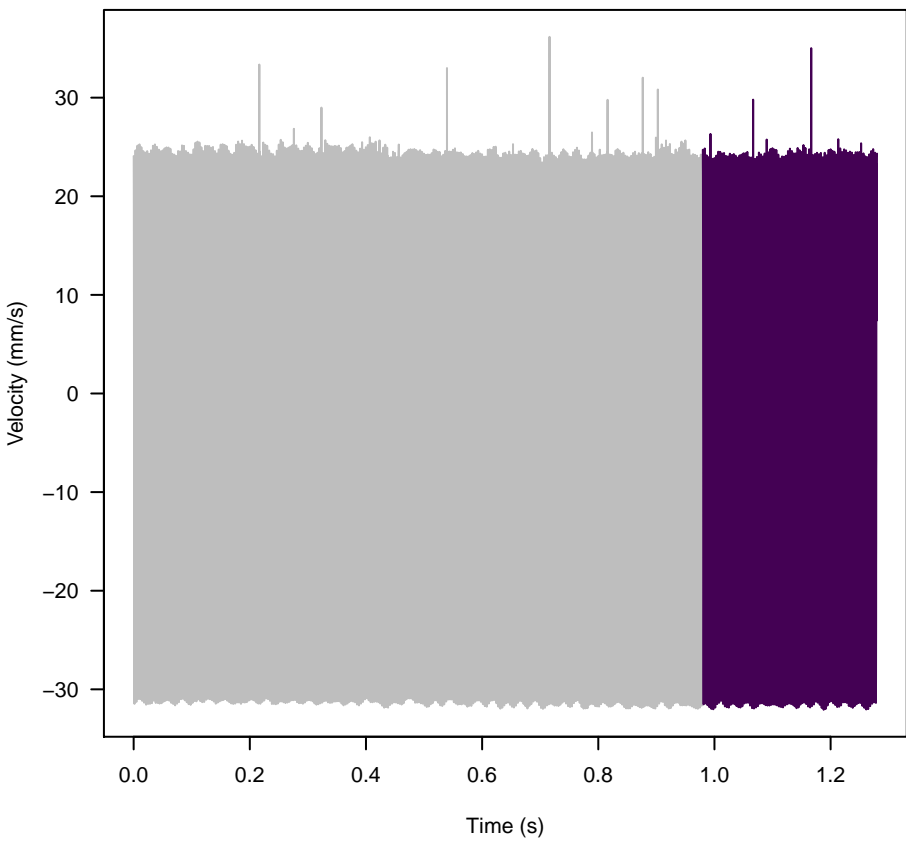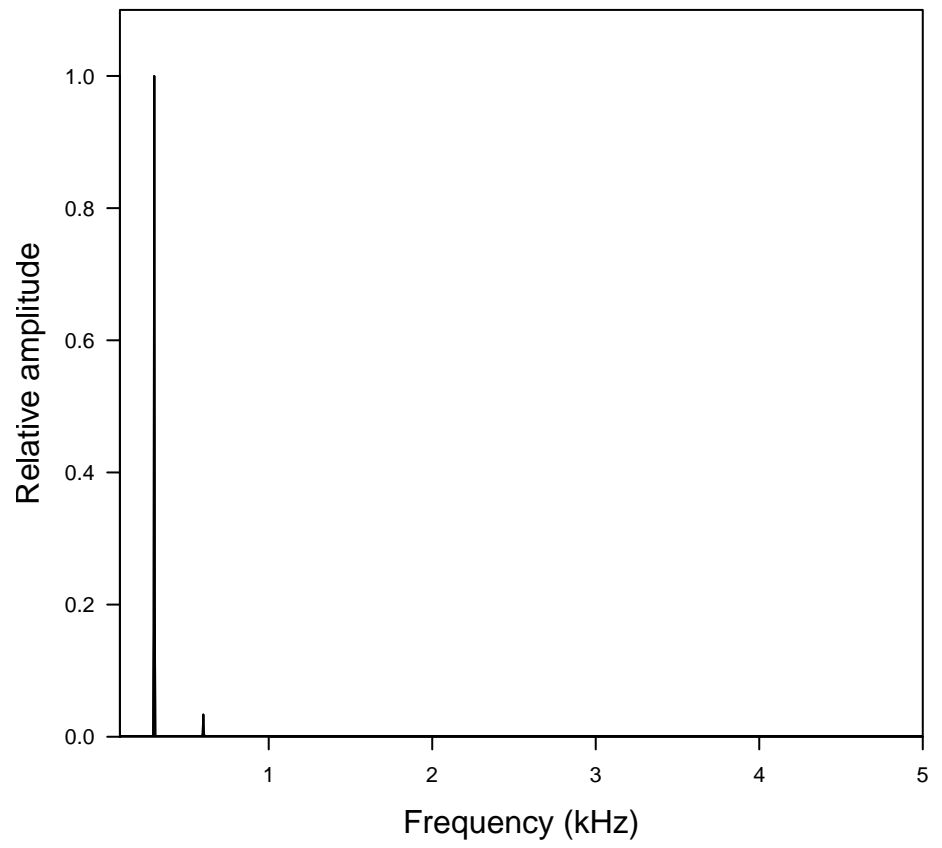

Vel. = 0.028 ; Str. = Receptacle ; Axis = z ; Fl. accession = 10-s-79-27

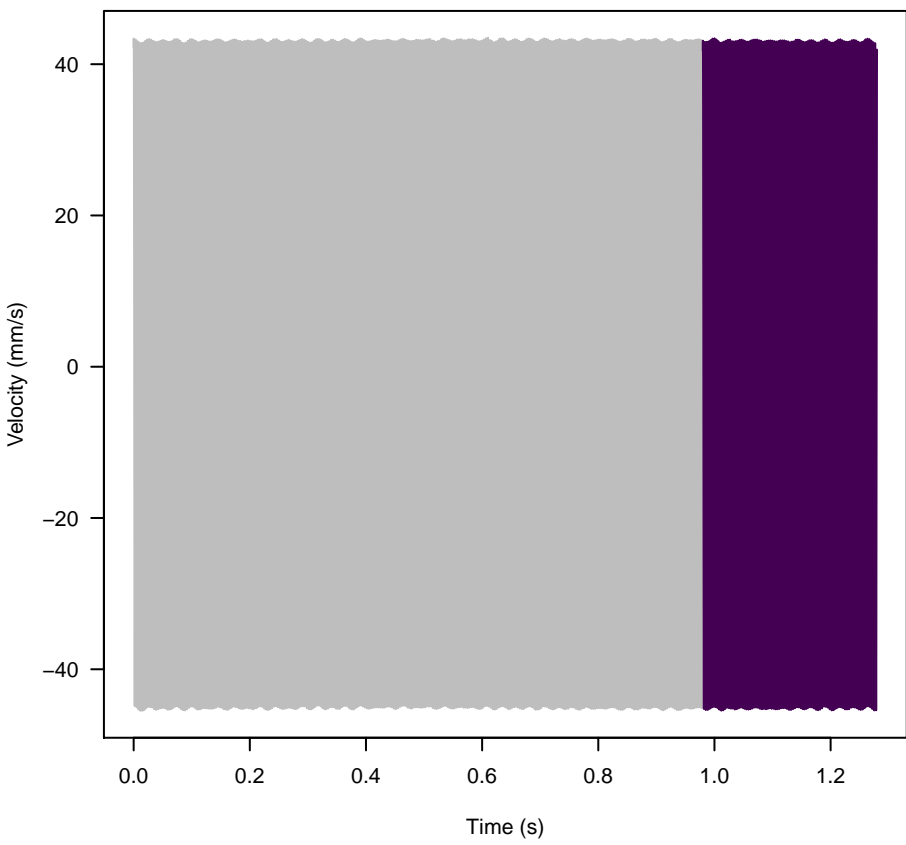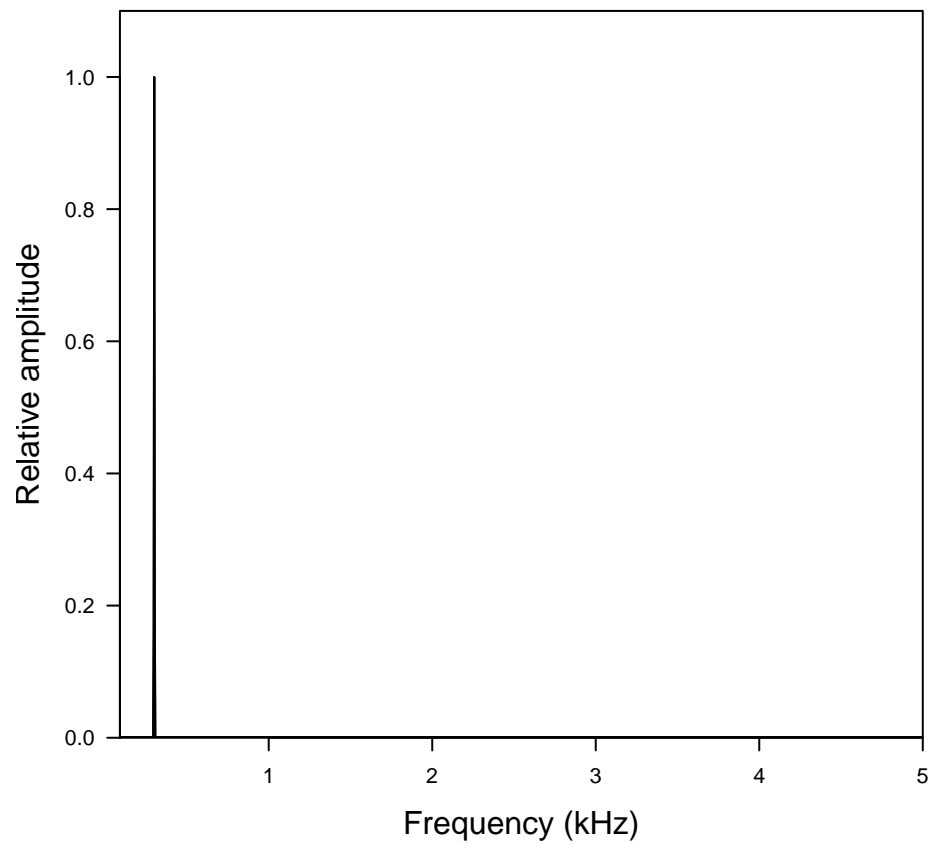

Vel. = 0.014 ; Str. = Corolla ; Axis = z ; Fl. accession = 10-s-79-27

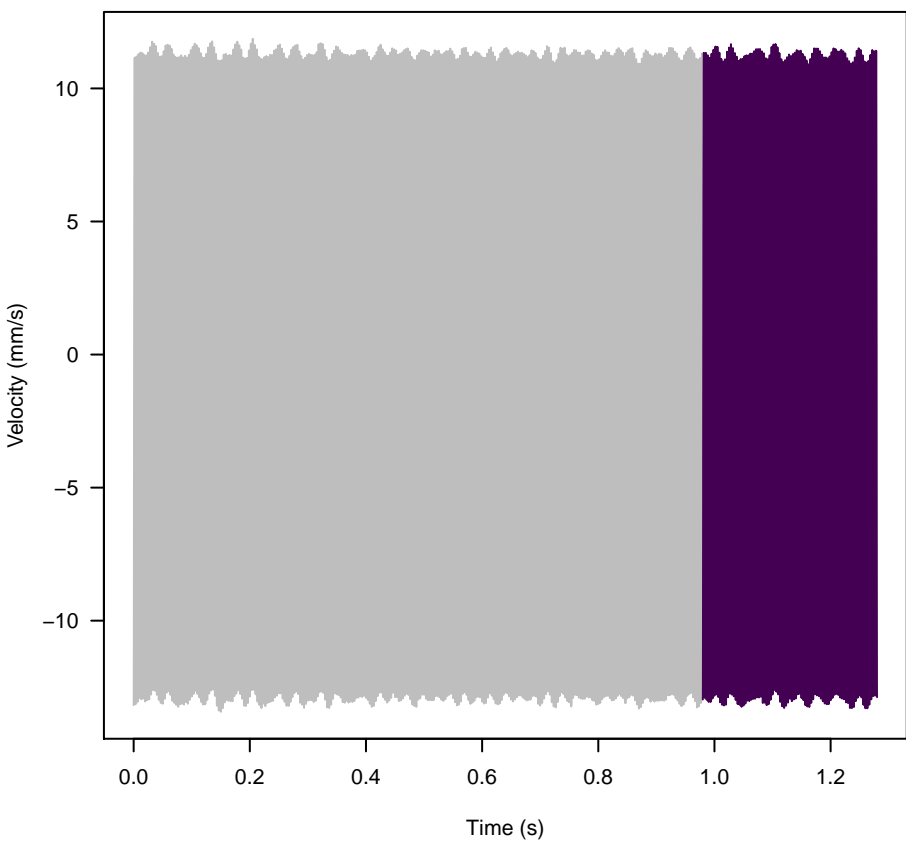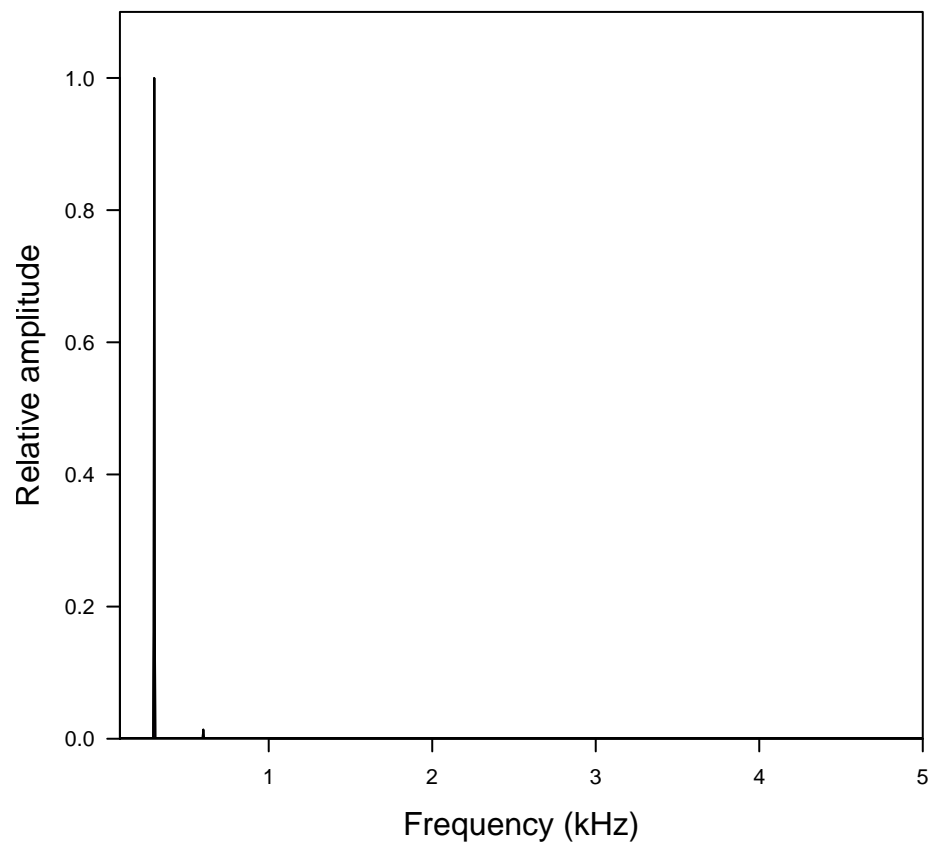

Vel. = 0.014 ; Str. = Receptacle ; Axis = z ; Fl. accession = 10-s-79-27

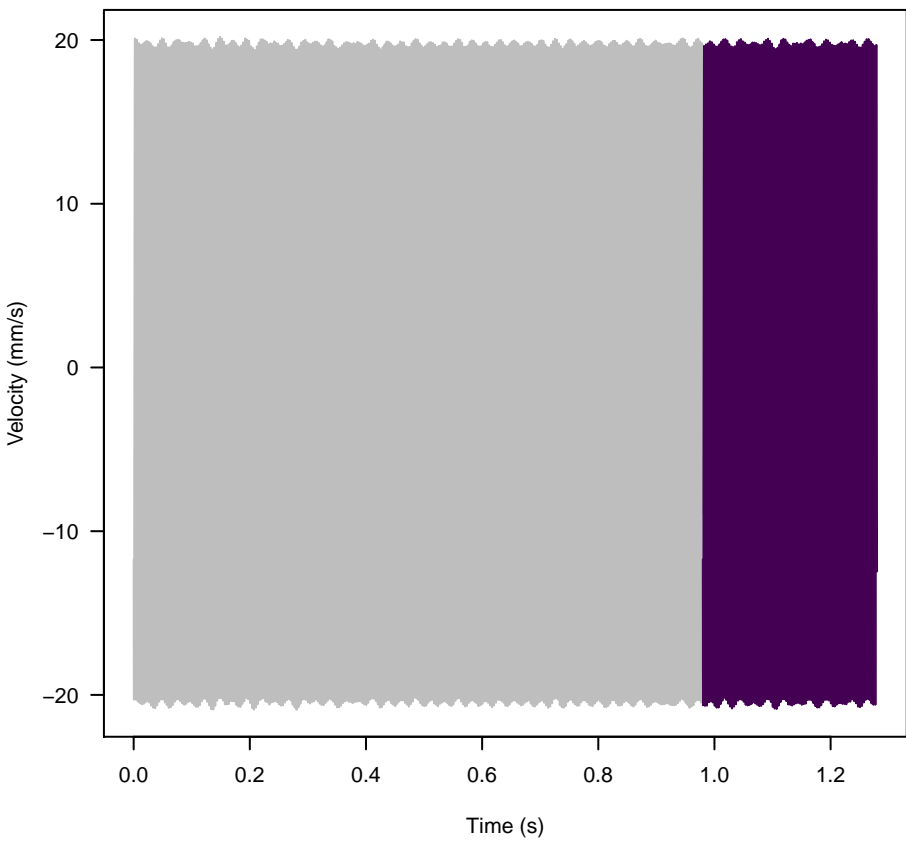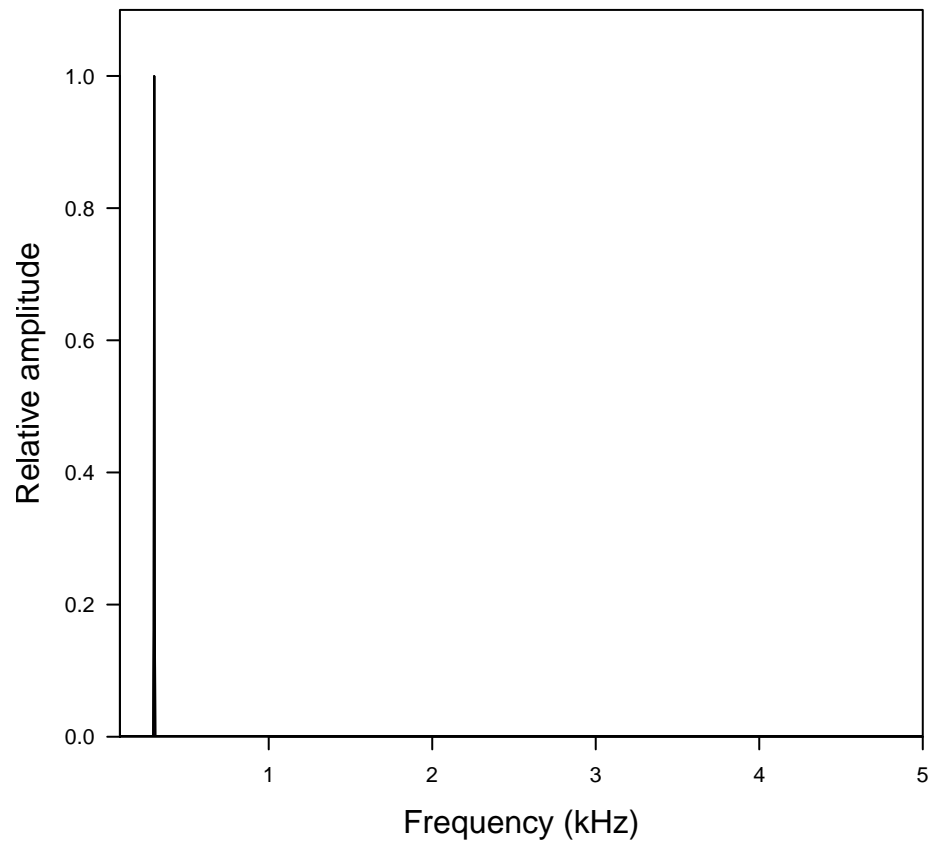

Vel. = 0.014 ; Str. = FA ; Axis = z ; Fl. accession = 10-s-79-27

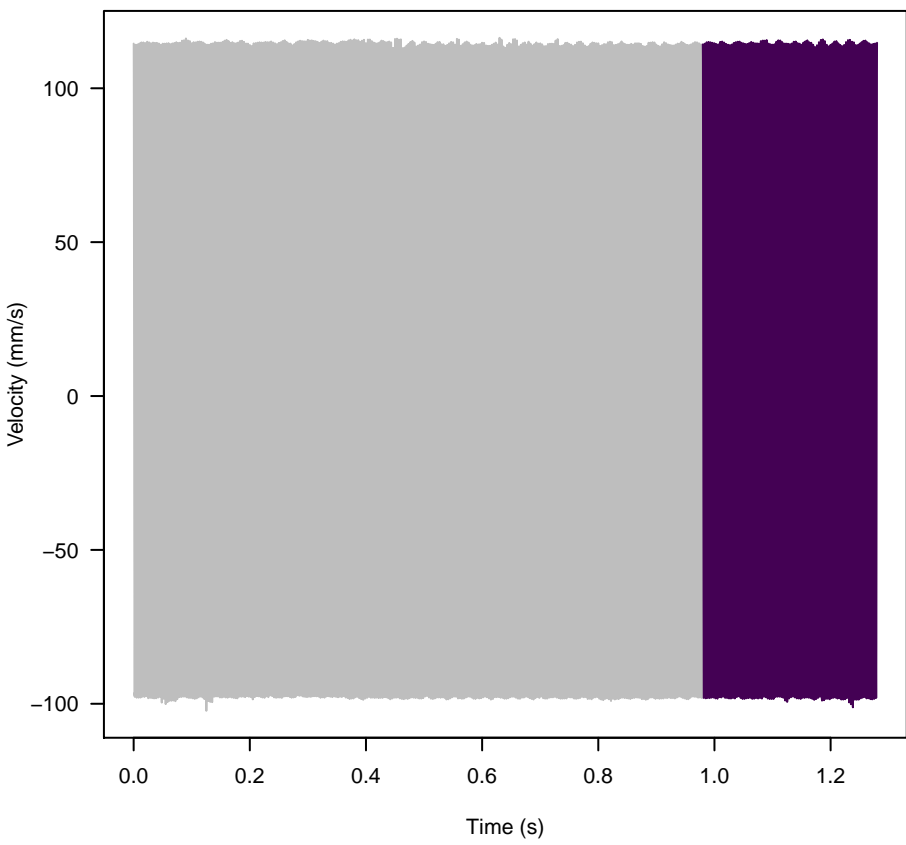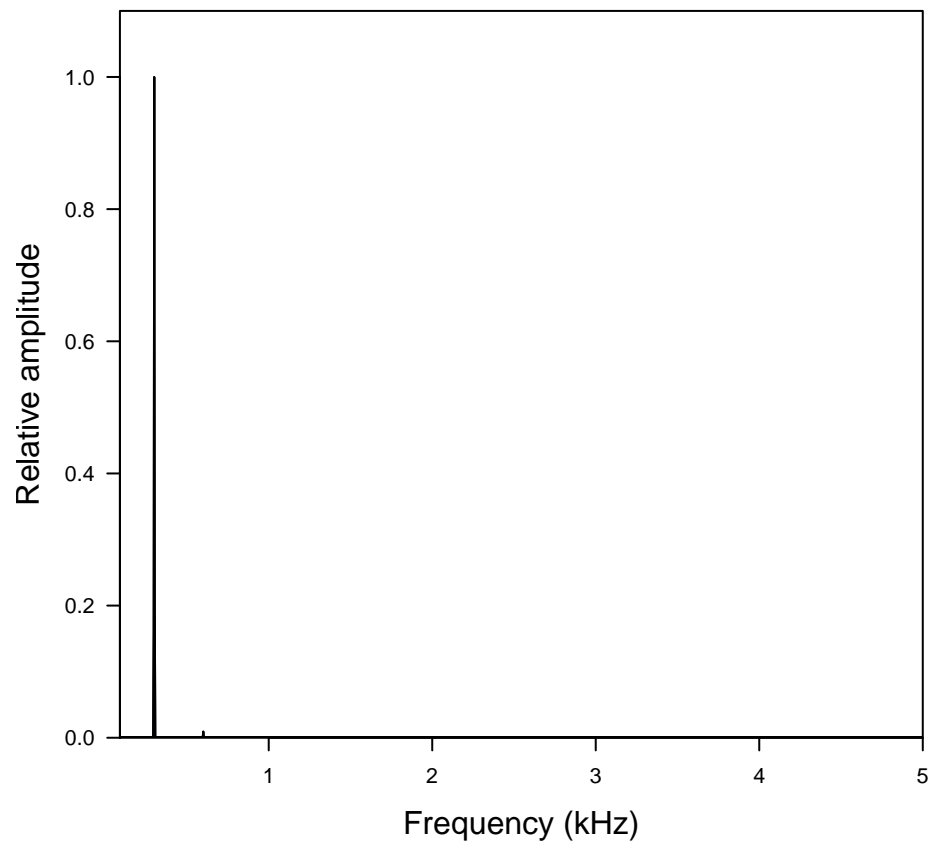

Vel. = 0.014 ; Str. = Receptacle ; Axis = z ; Fl. accession = 10-s-79-27

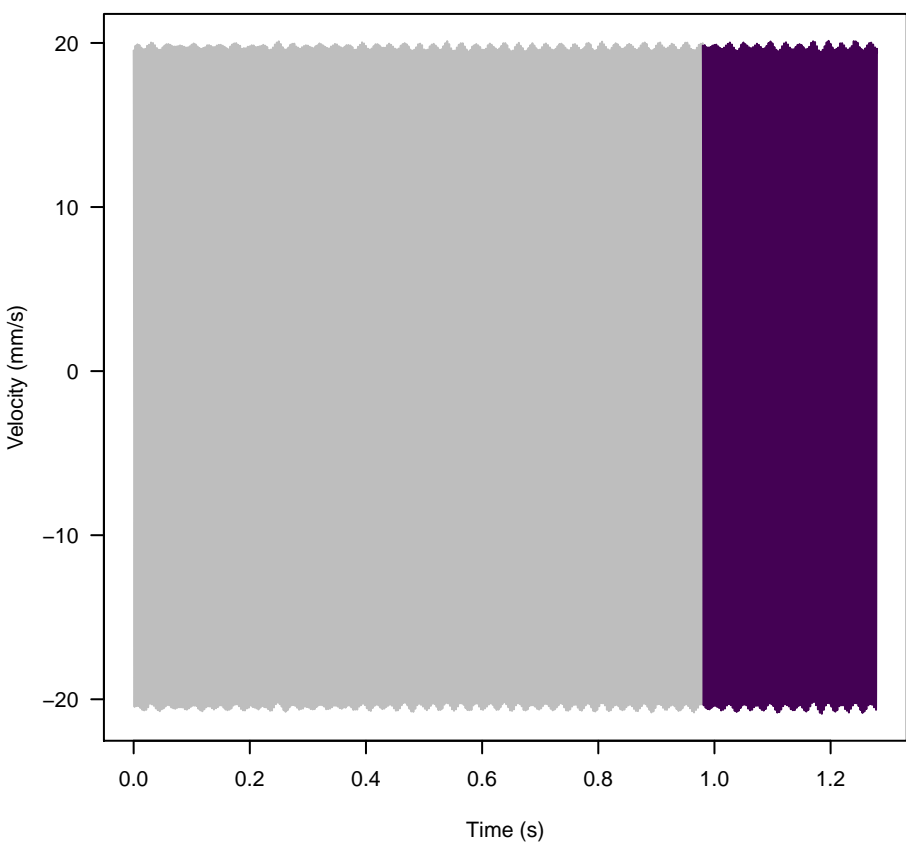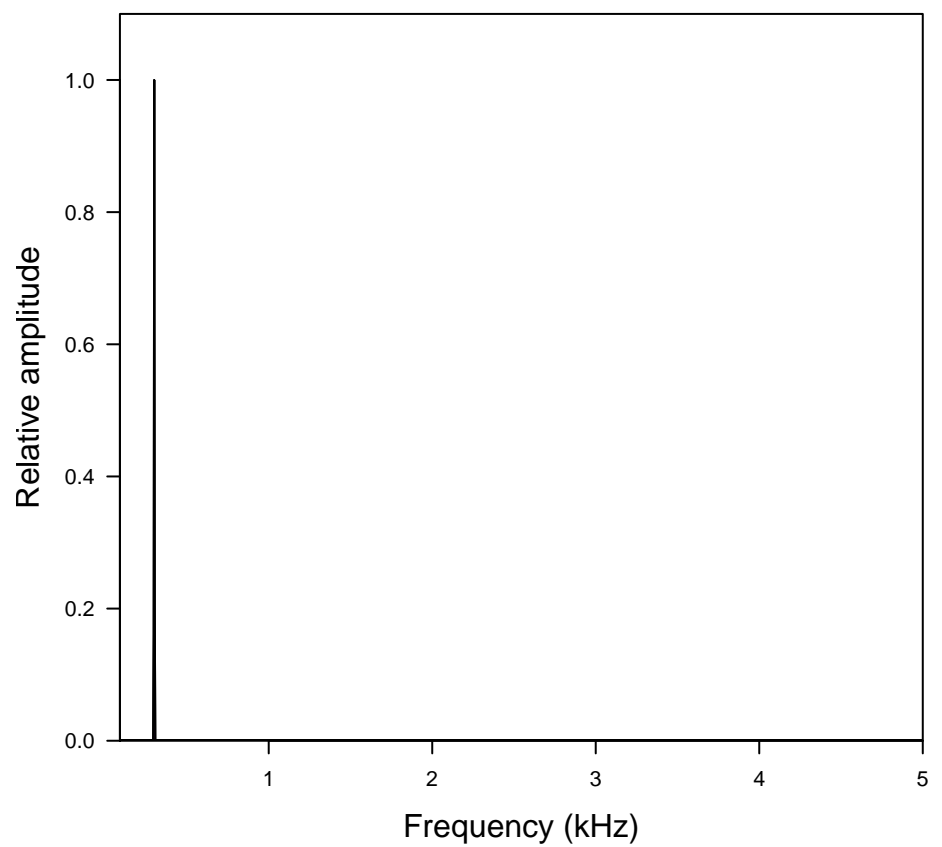

Vel. = 0.014 ; Str. = PA ; Axis = z ; Fl. accession = 10-s-79-27

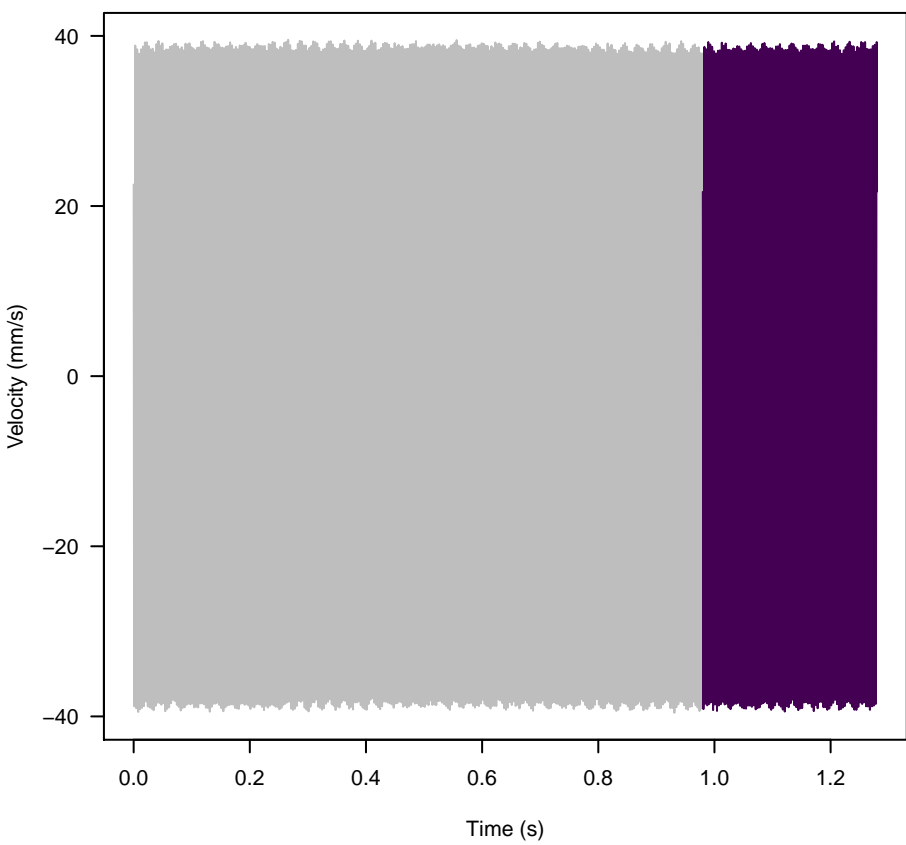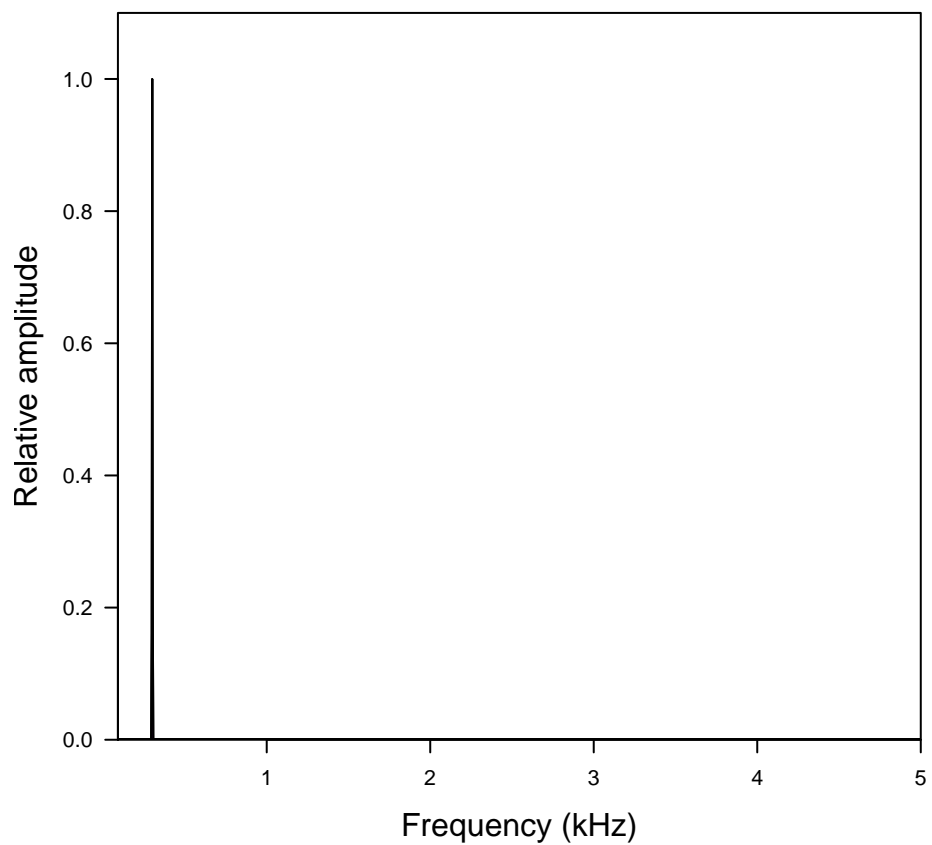

Vel. = 0.014 ; Str. = Receptacle ; Axis = z ; Fl. accession = 10-s-79-27

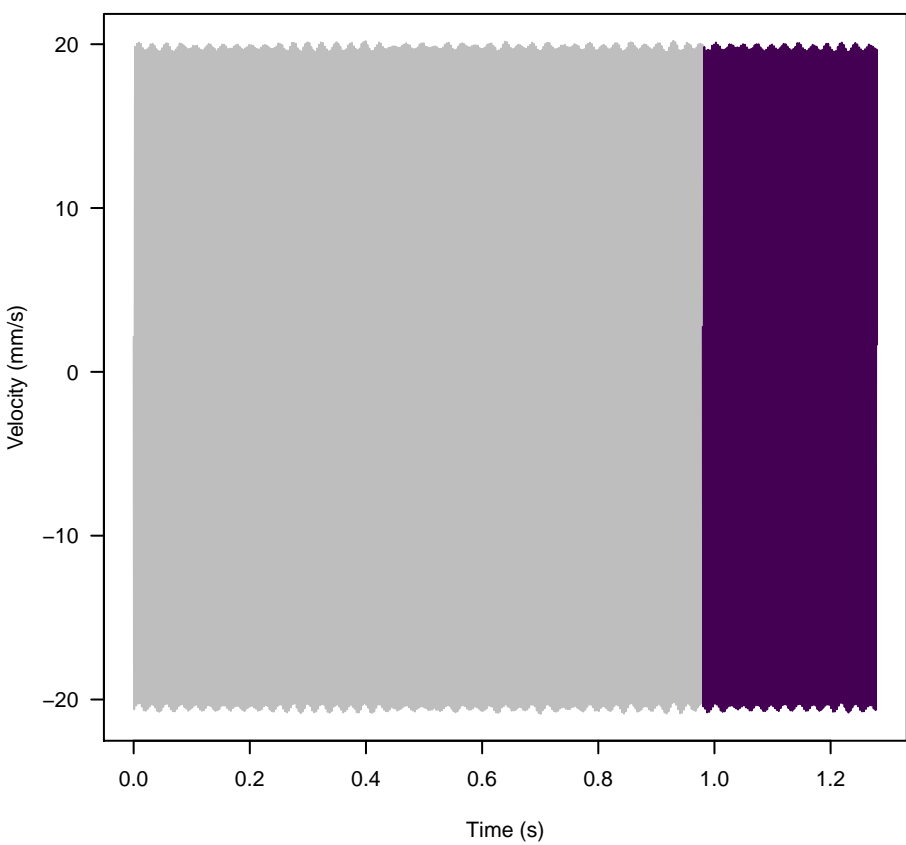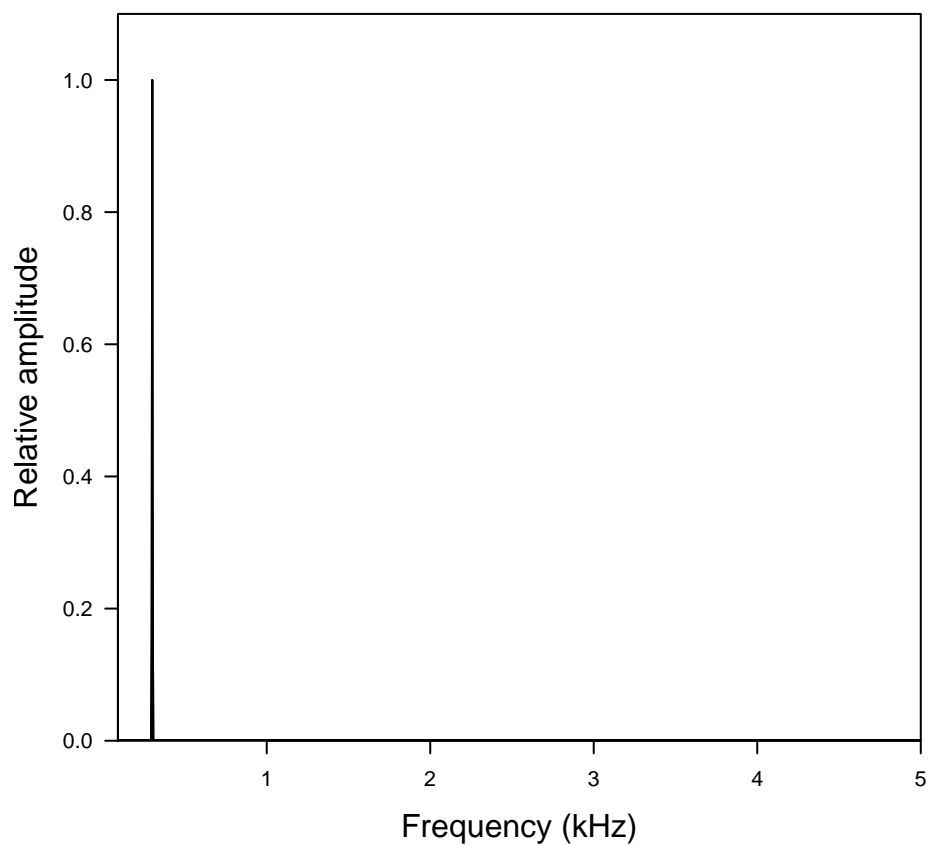

Vel. = 0.014 ; Str. = Corolla ; Axis = y ; Fl. accession = 10-s-79-27

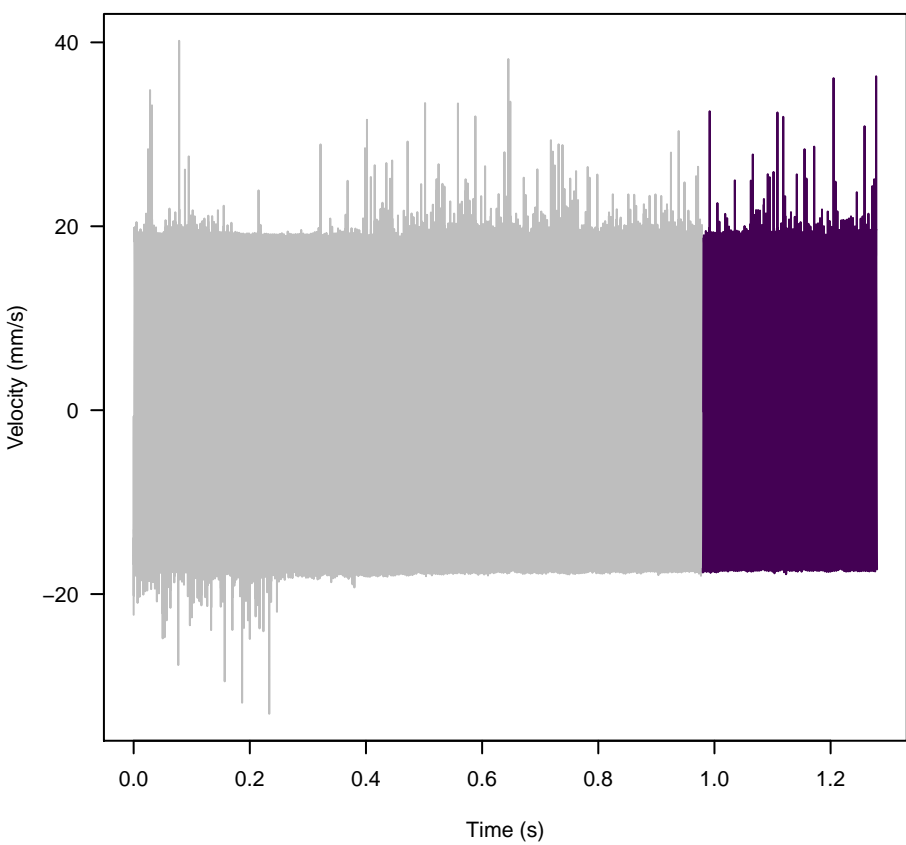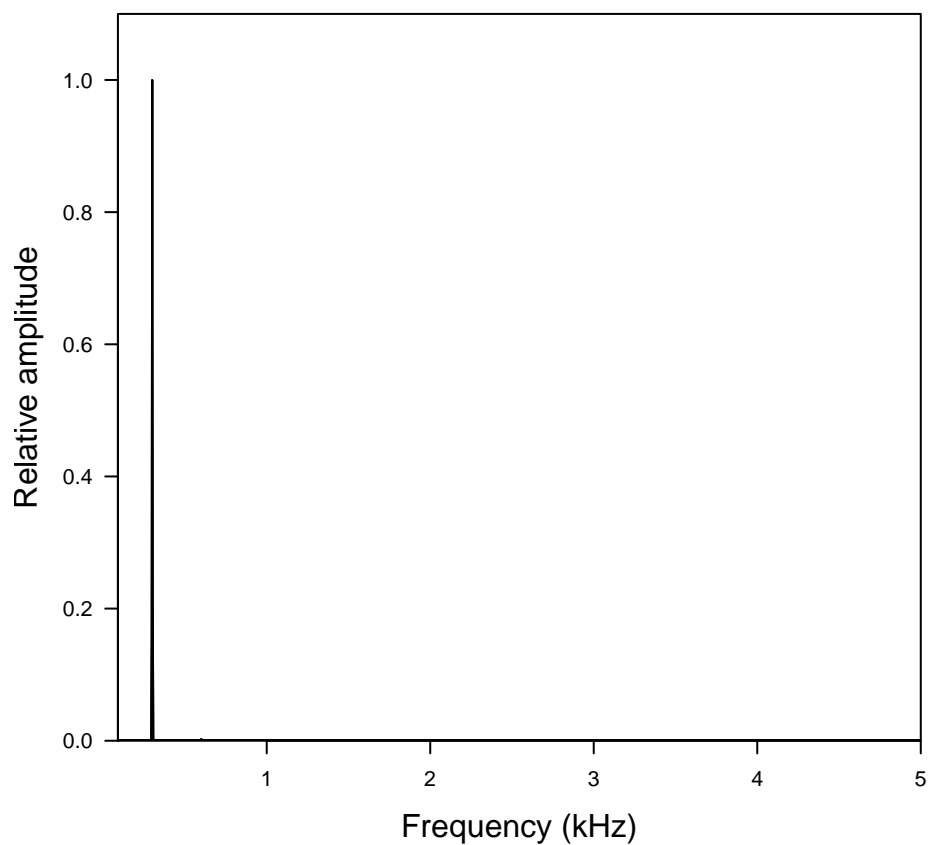

Vel. = 0.014 ; Str. = Receptacle ; Axis = y ; Fl. accession = 10-s-79-27

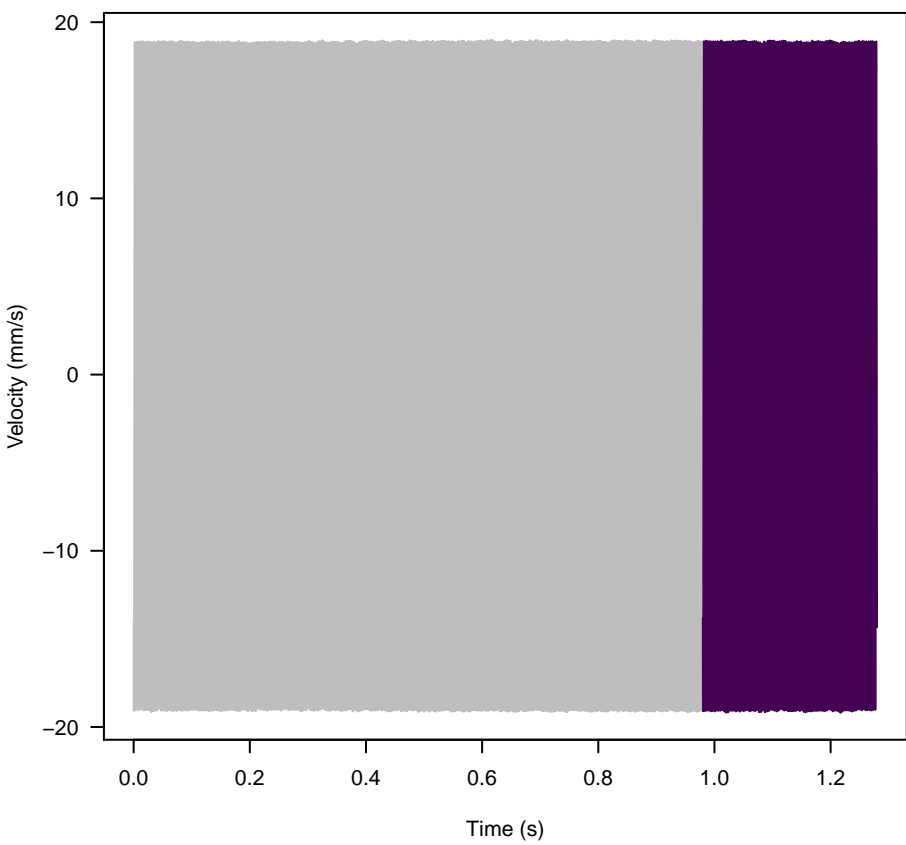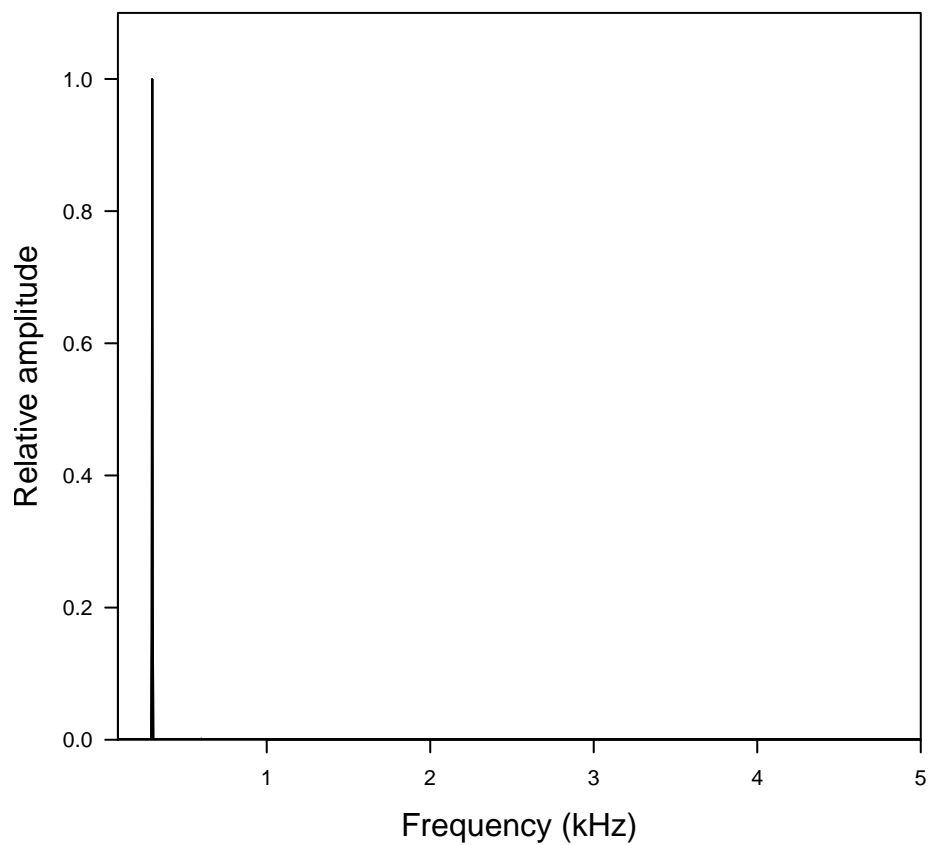

Vel. = 0.014 ; Str. = FA ; Axis = y ; Fl. accession = 10-s-79-27

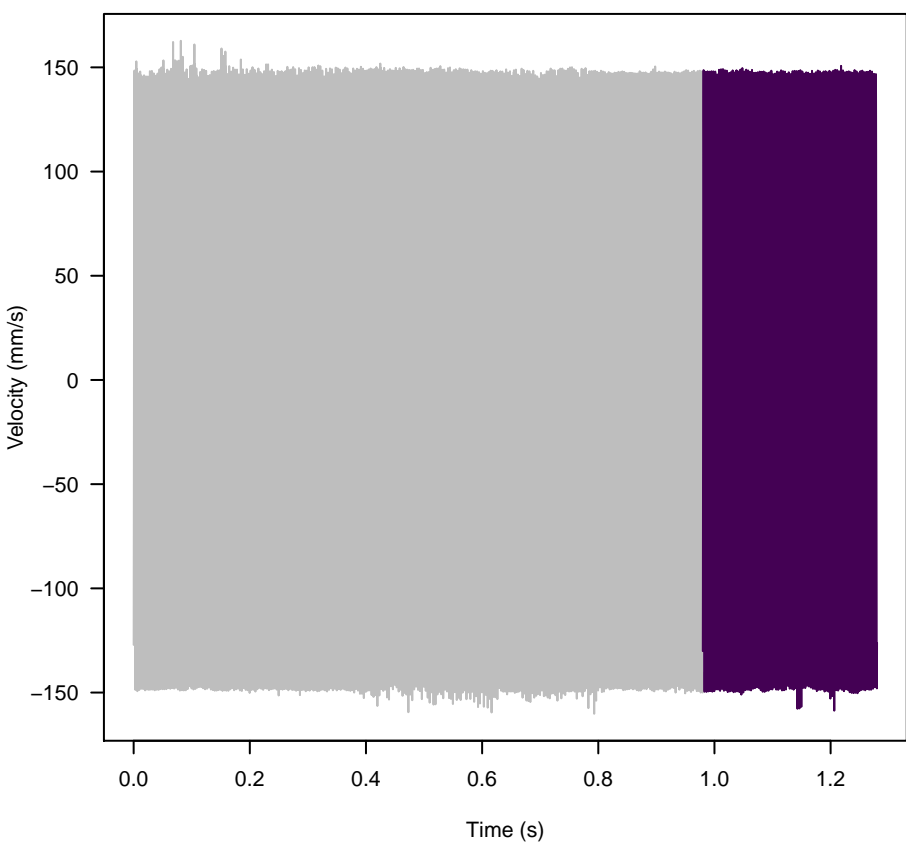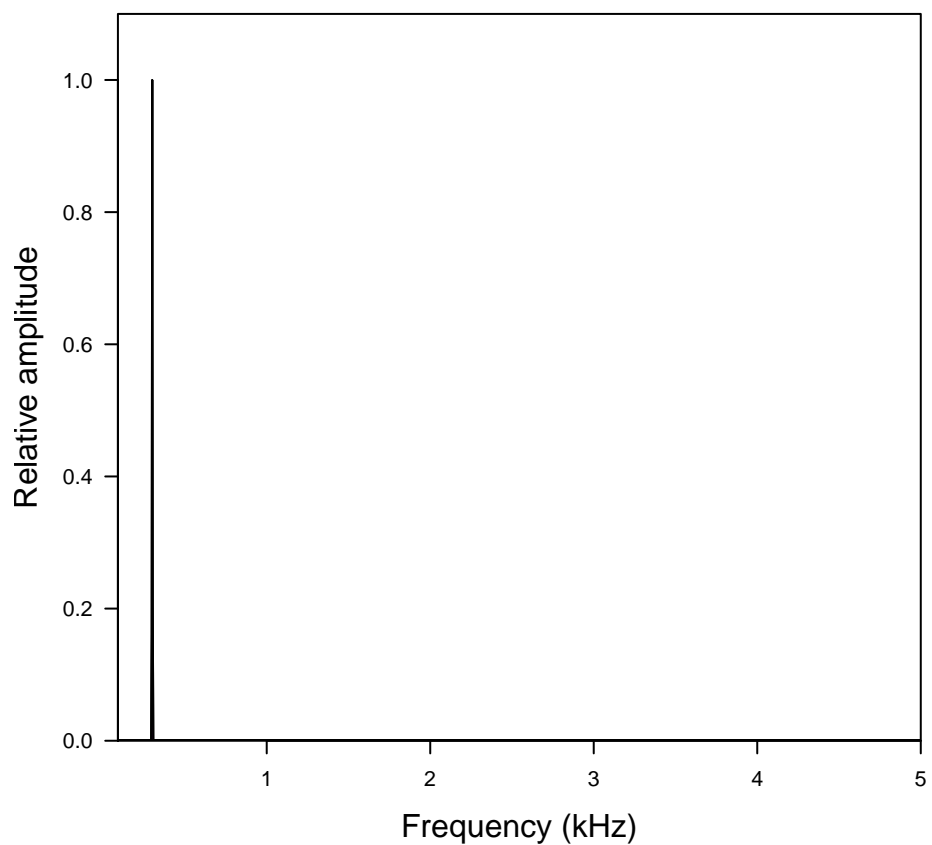

Vel. = 0.014 ; Str. = Receptacle ; Axis = y ; Fl. accession = 10-s-79-27

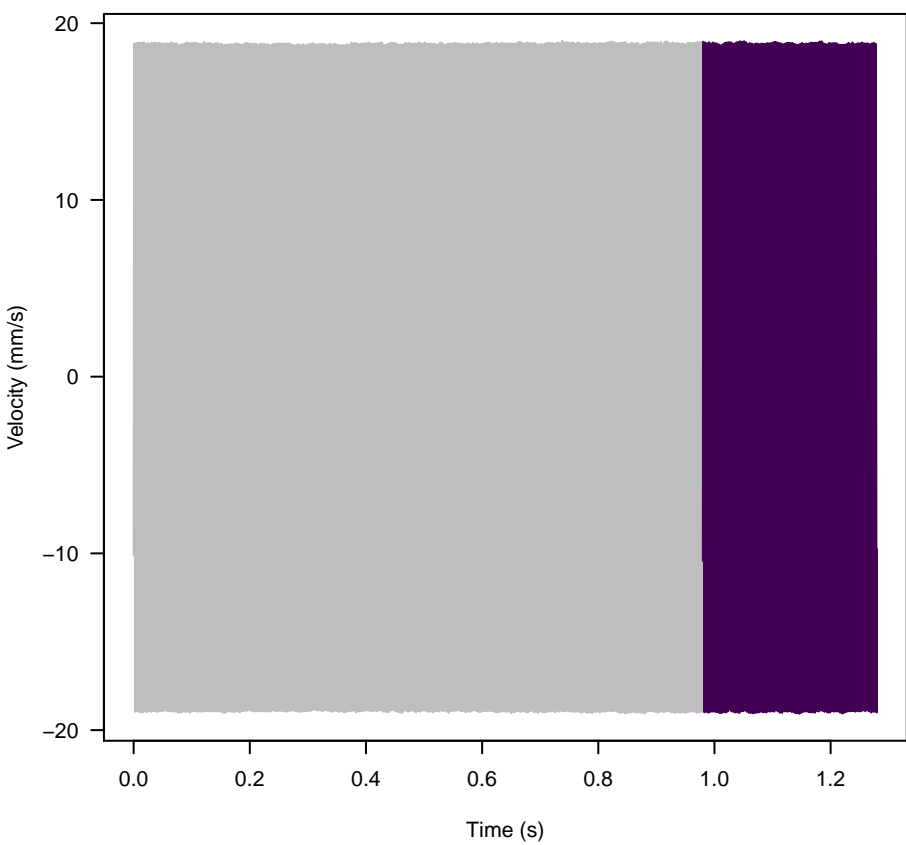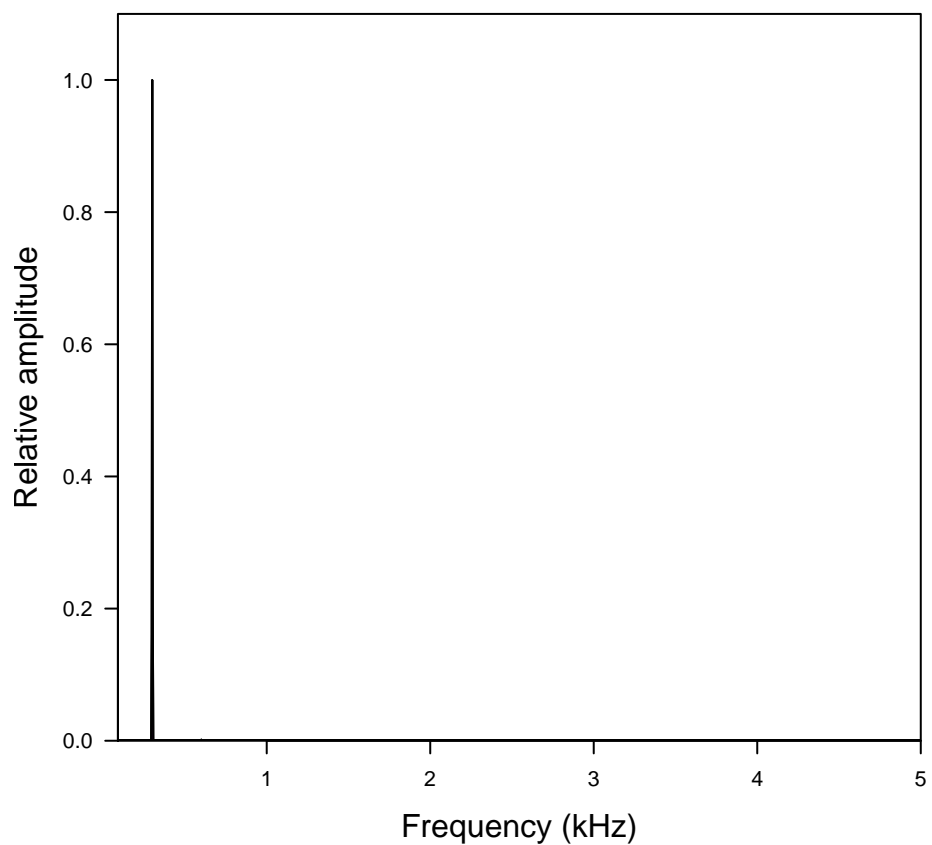

Vel. = 0.014 ; Str. = PA ; Axis = y ; Fl. accession = 10-s-79-27

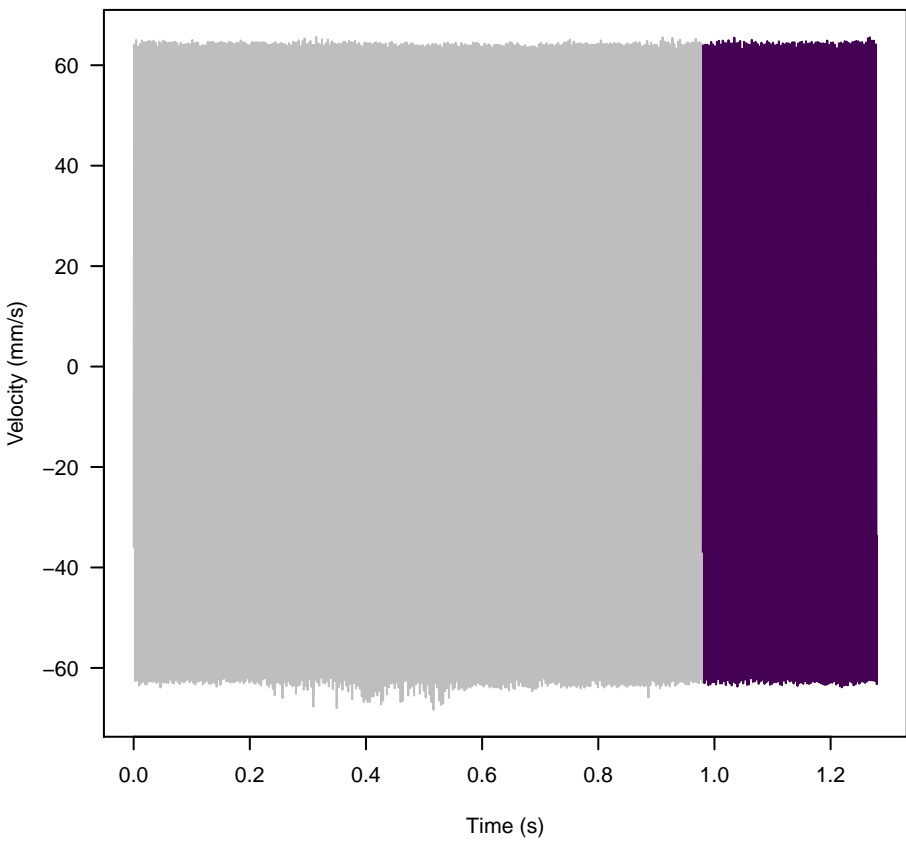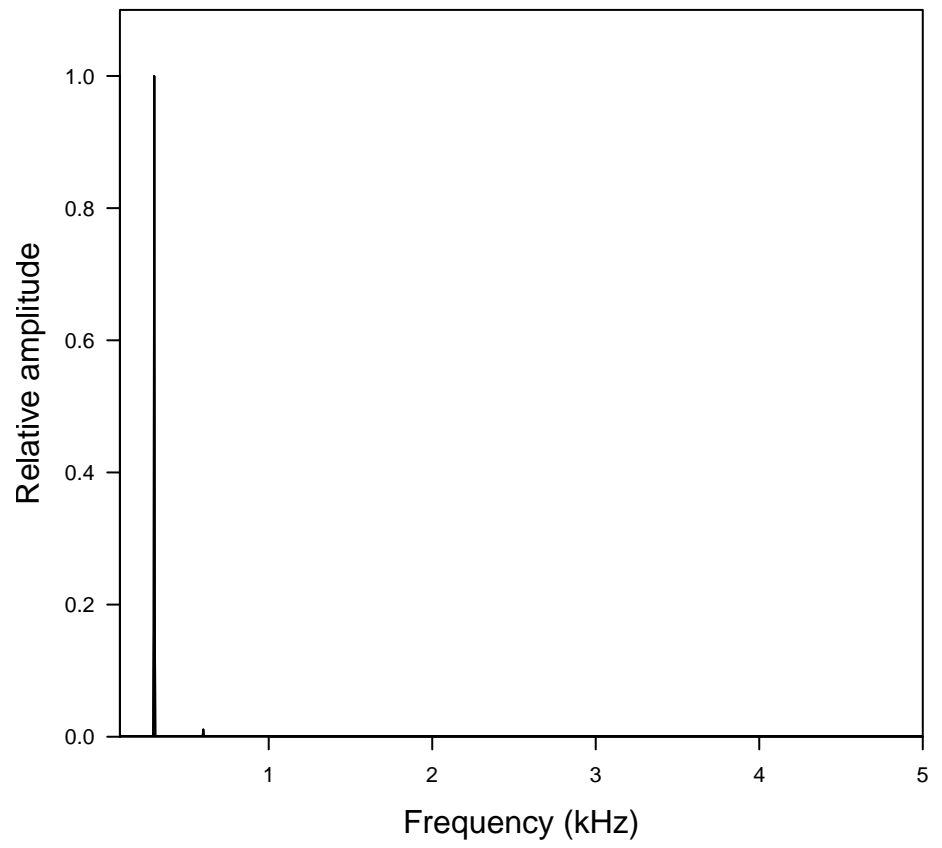

Vel. = 0.014 ; Str. = Receptacle ; Axis = y ; Fl. accession = 10-s-79-27

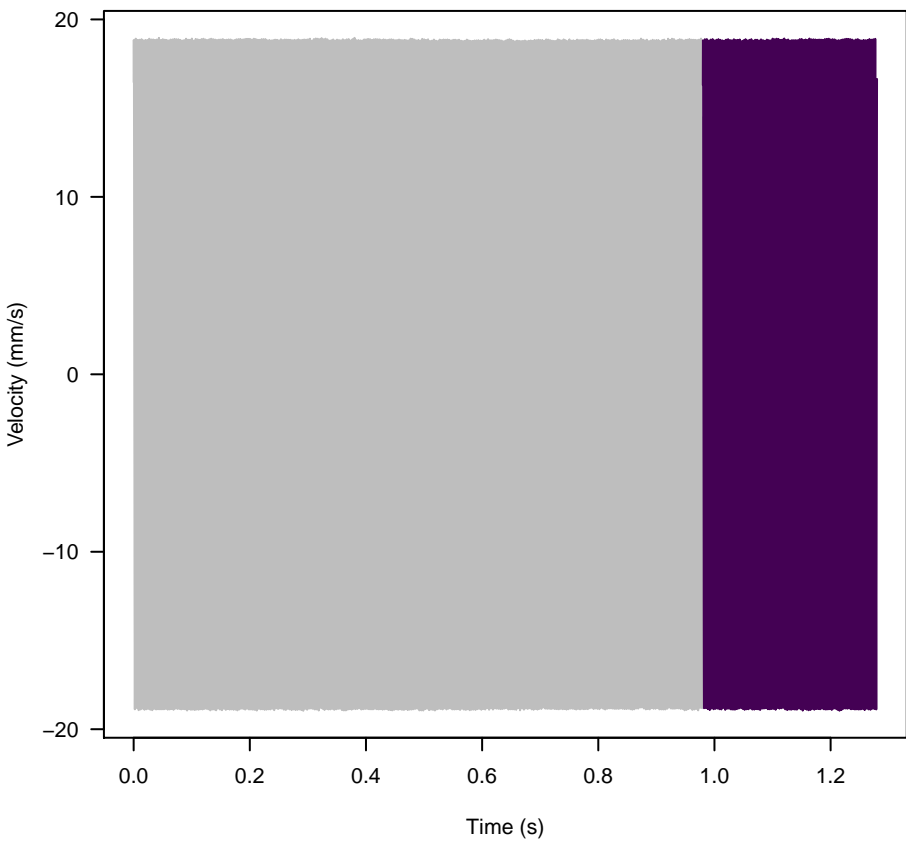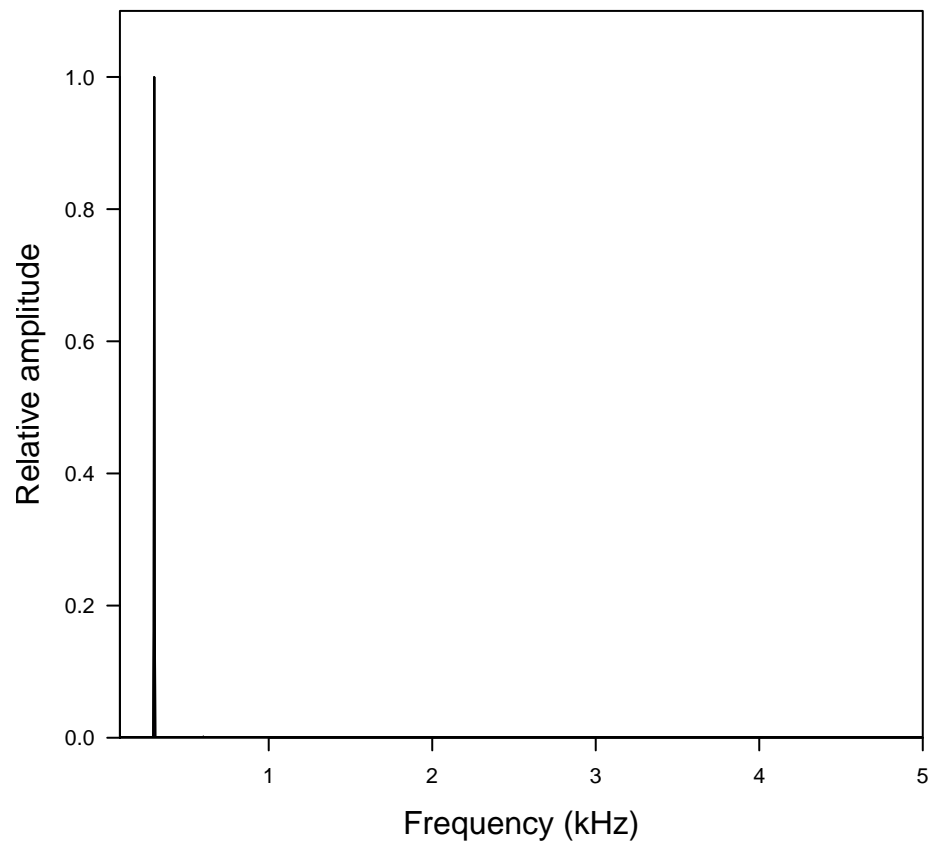

Vel. = 0.028 ; Str. = PA ; Axis = y ; Fl. accession = 10-s-79-27

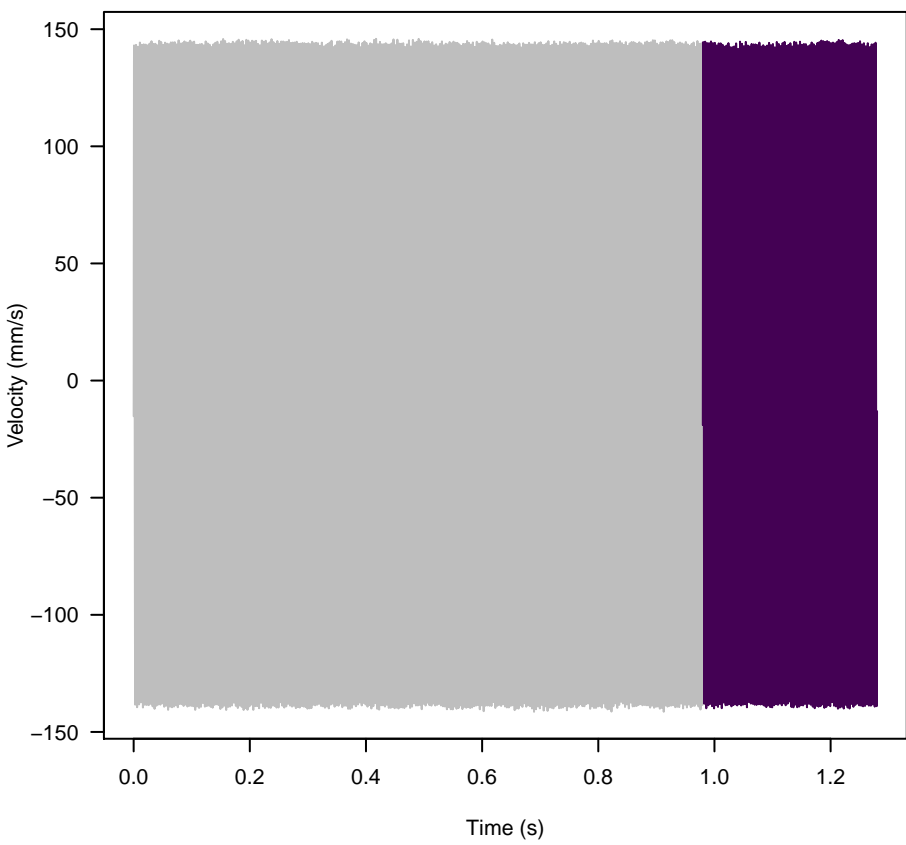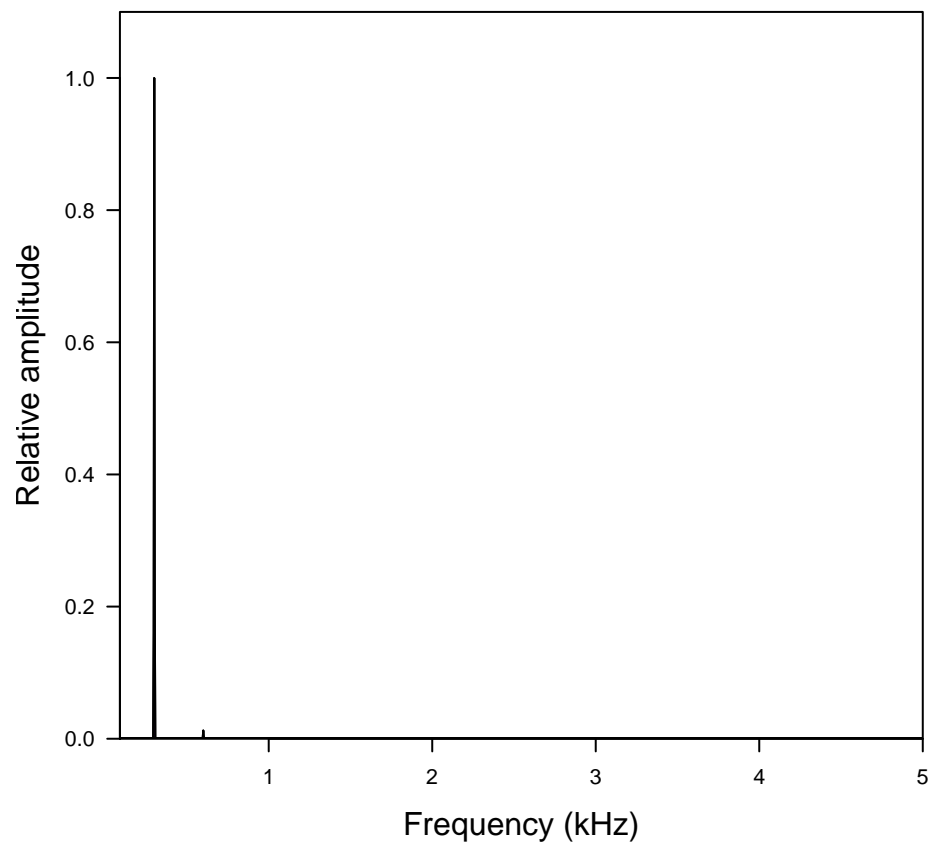

Vel. = 0.028 ; Str. = Receptacle ; Axis = y ; Fl. accession = 10-s-79-27

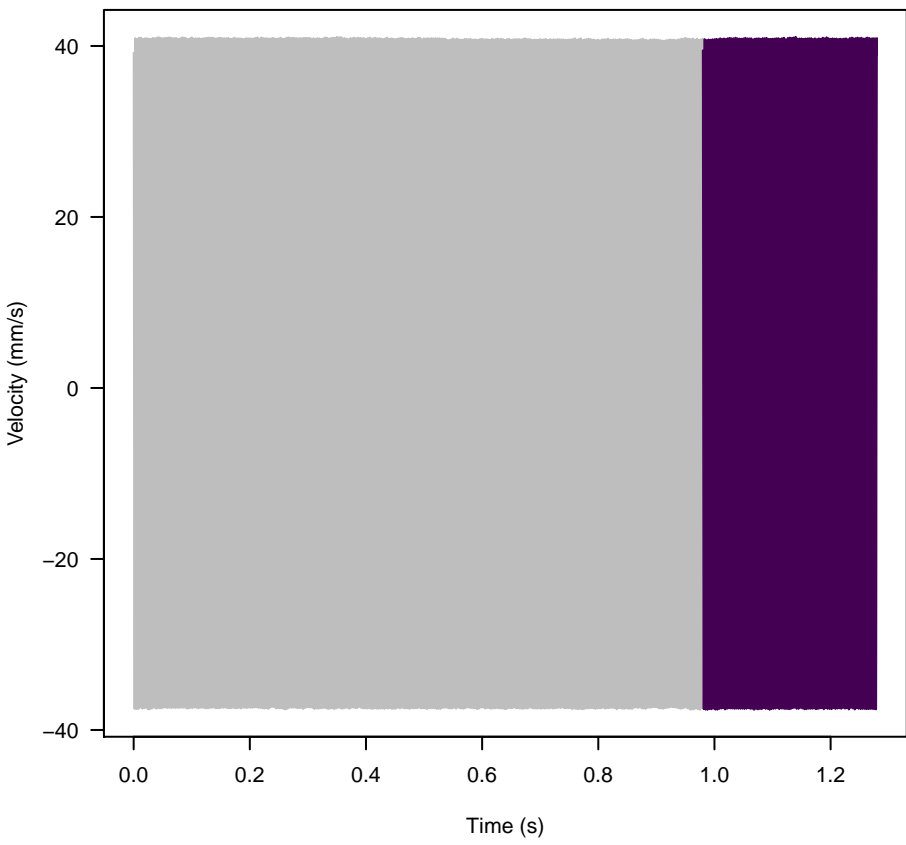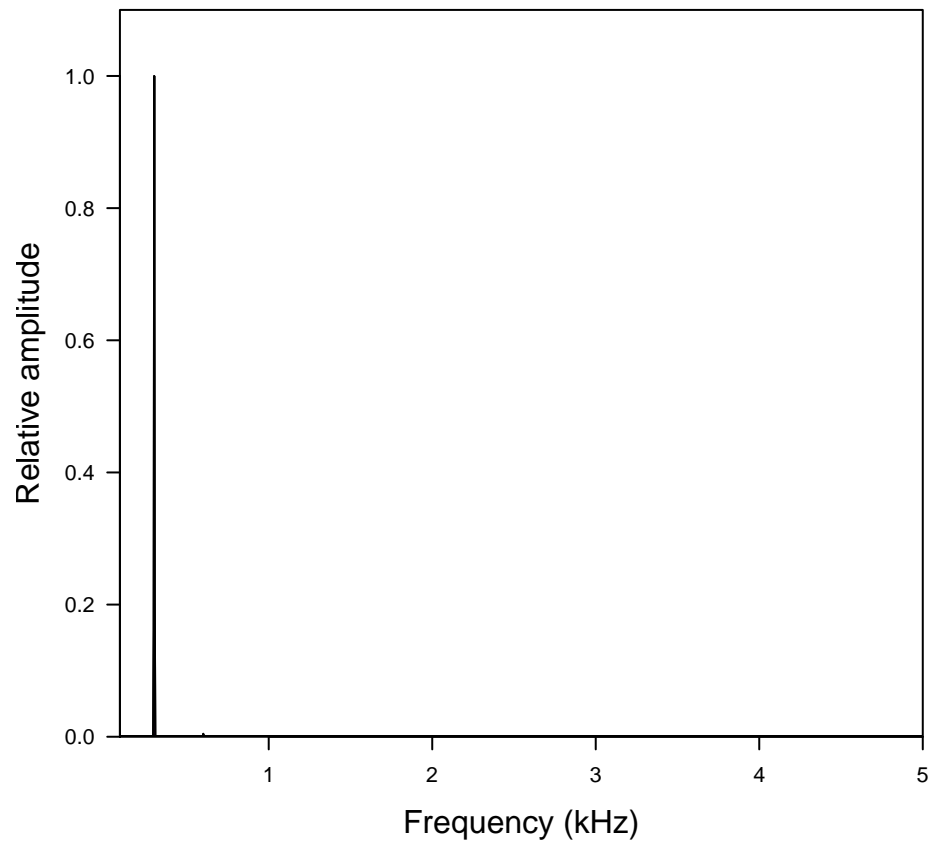

Vel. = 0.028 ; Str. = FA ; Axis = y ; Fl. accession = 10-s-79-27

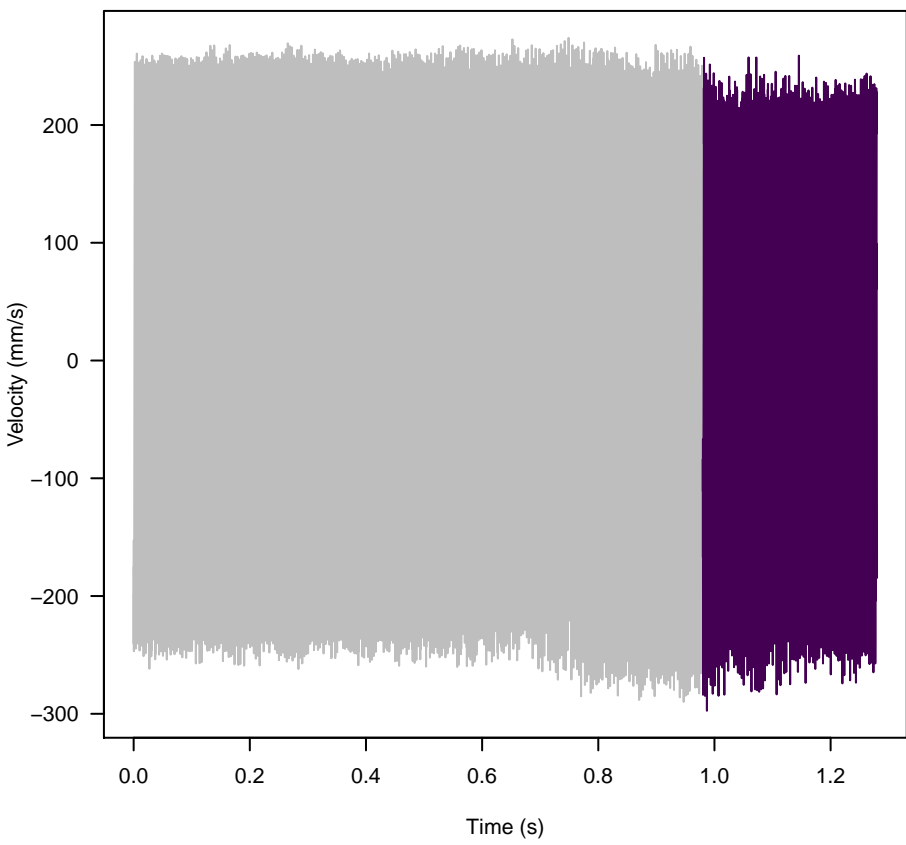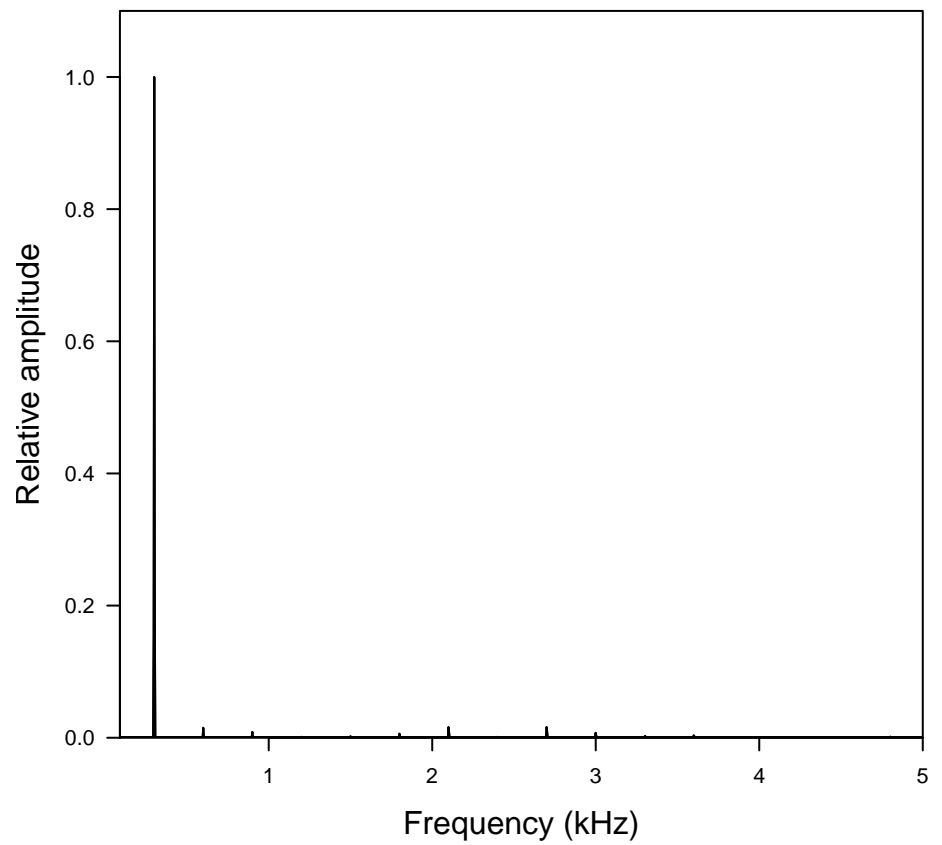

Vel. = 0.028 ; Str. = Receptacle ; Axis = y ; Fl. accession = 10-s-79-27

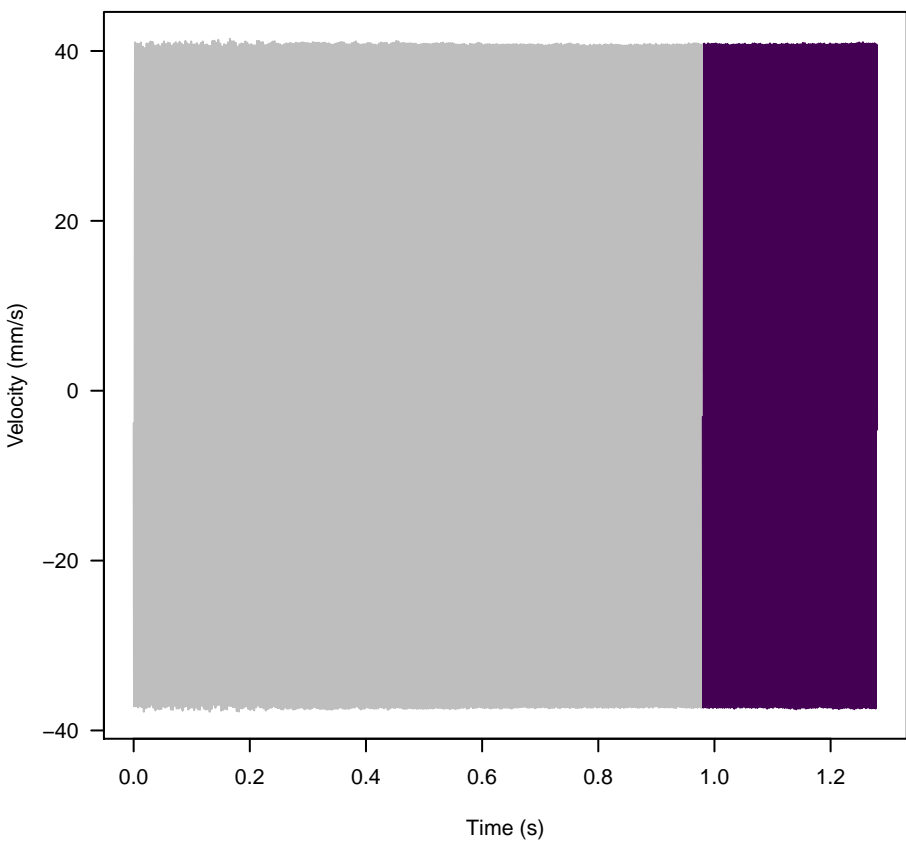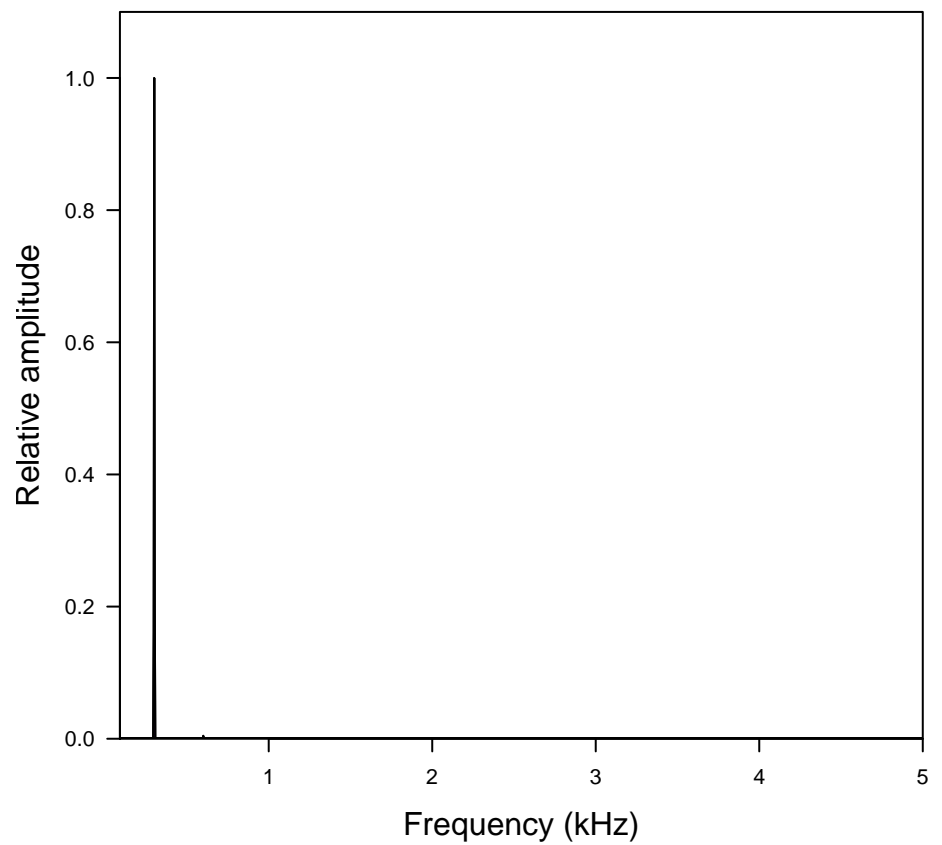

Vel. = 0.028 ; Str. = Corolla ; Axis = y ; Fl. accession = 10-s-79-27

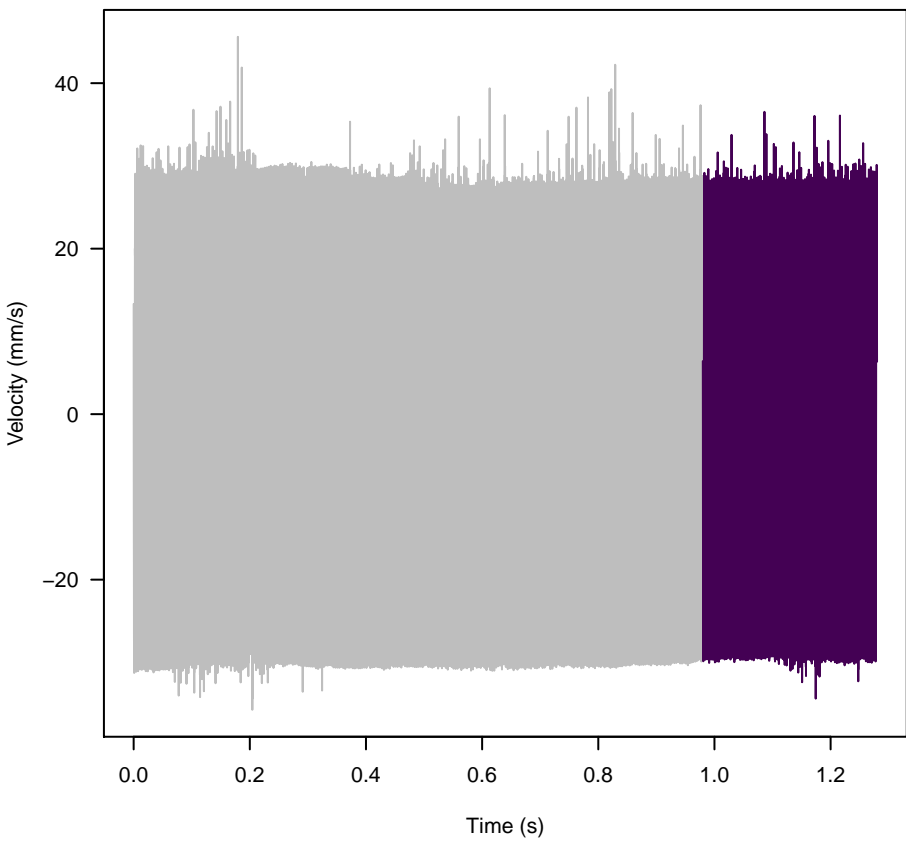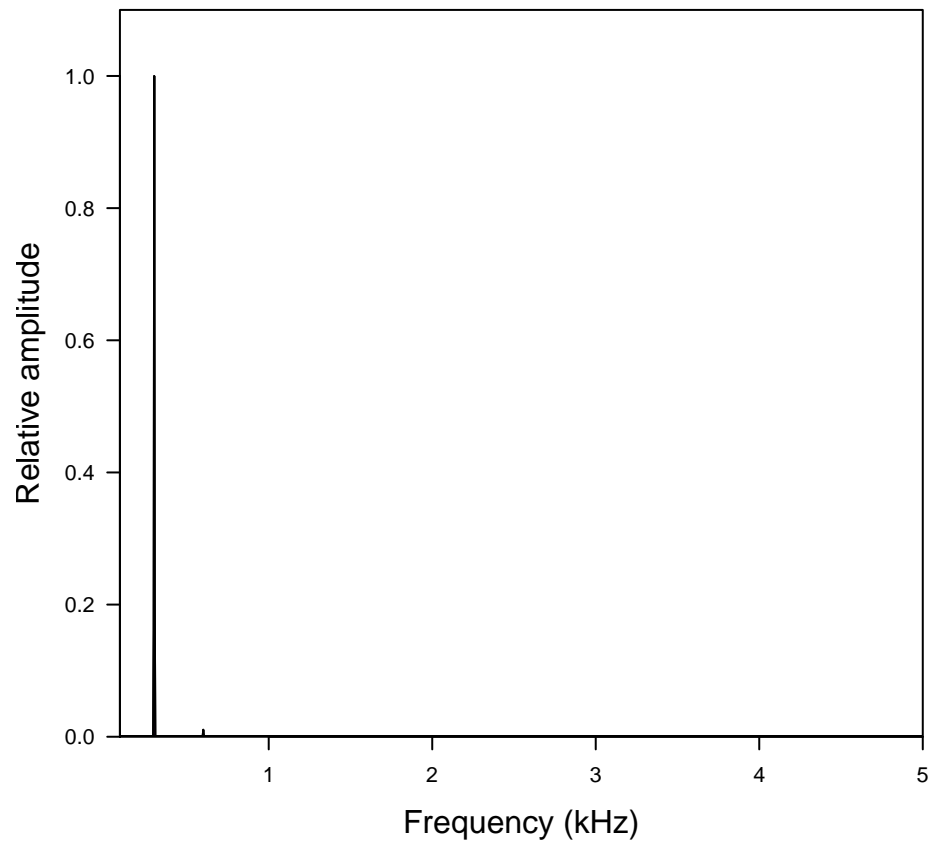

Vel. = 0.028 ; Str. = Receptacle ; Axis = y ; Fl. accession = 10-s-79-27

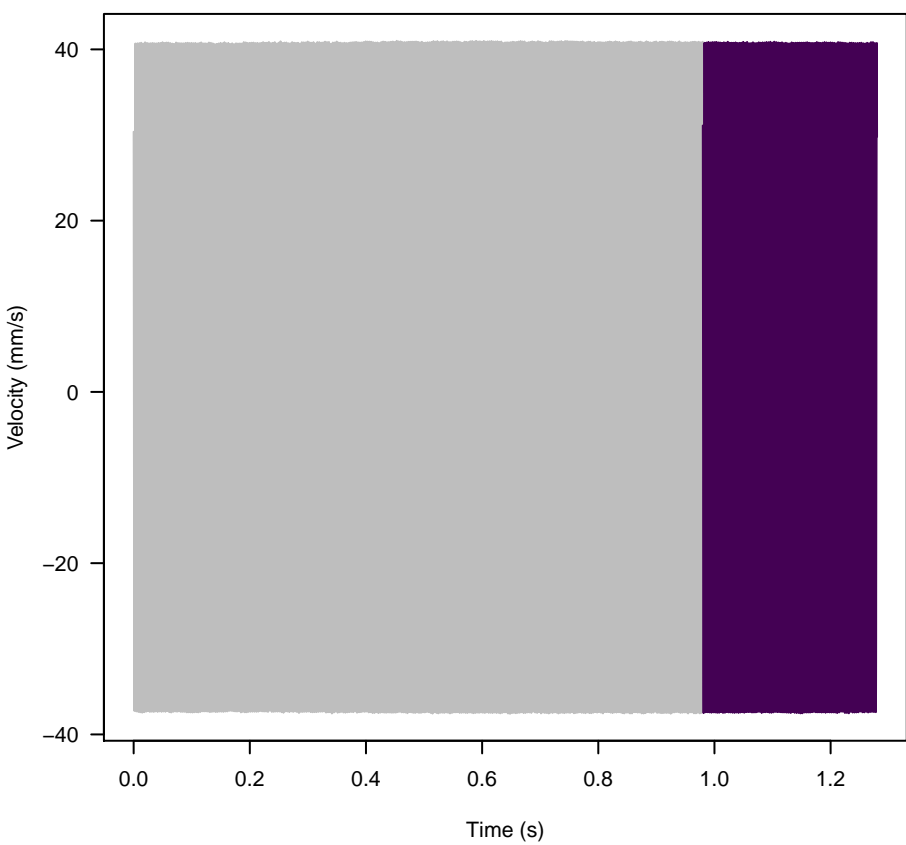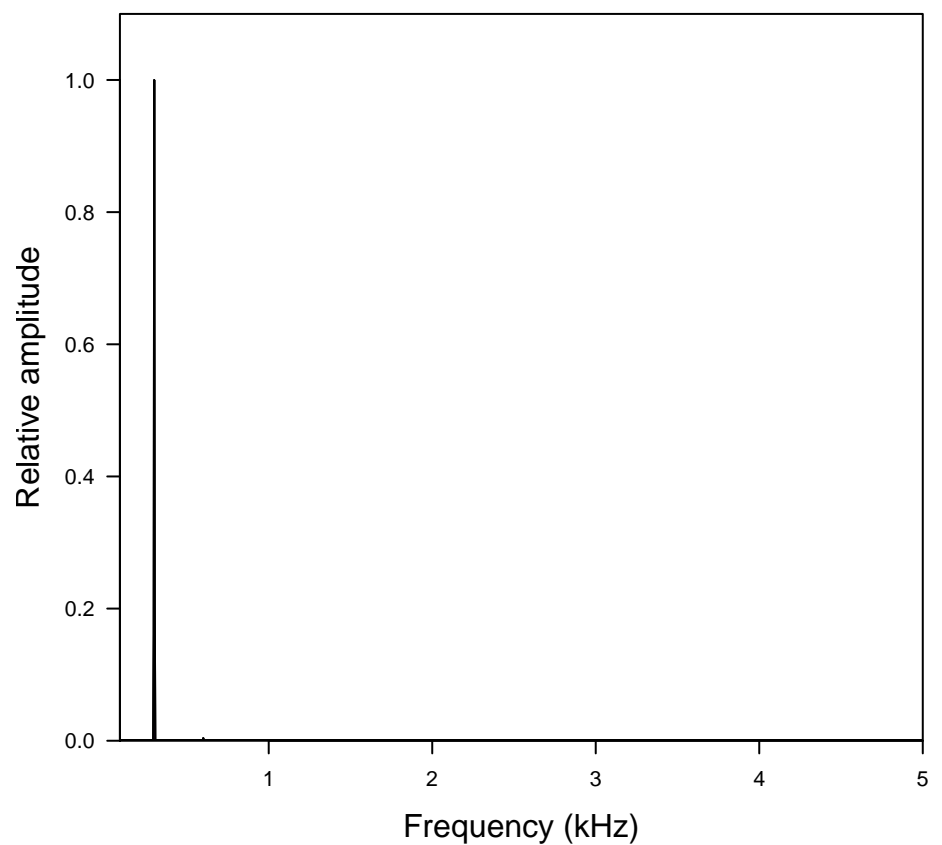

Vel. = 0.057 ; Str. = Corolla ; Axis = y ; Fl. accession = 10-s-79-27

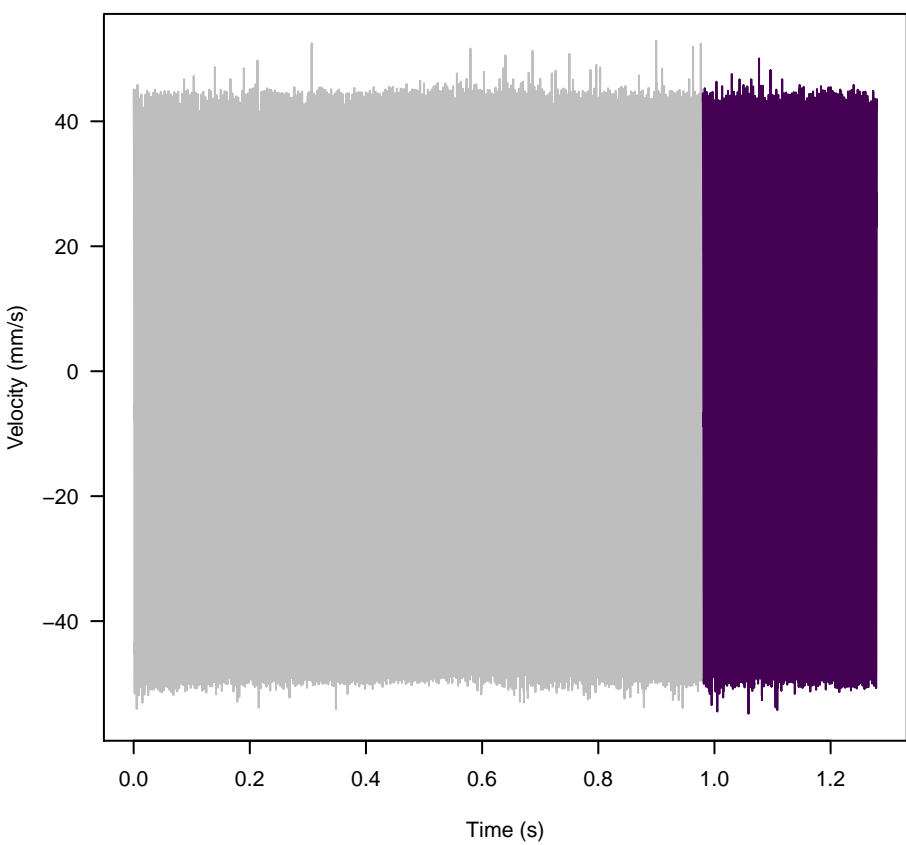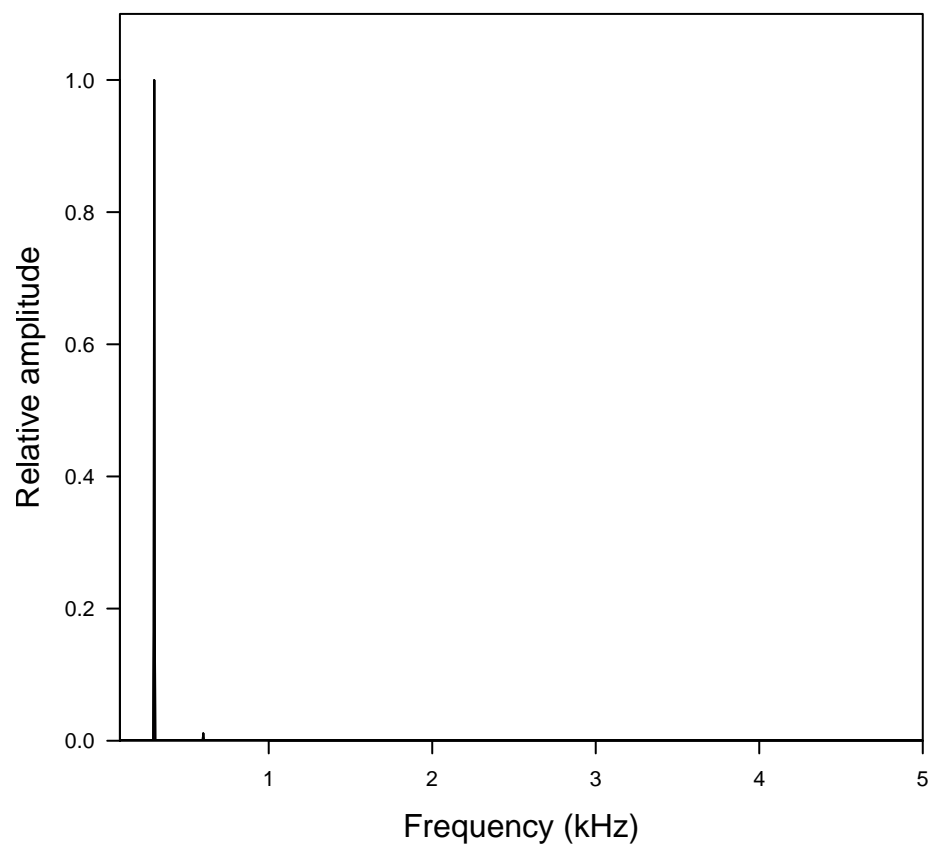



Vel. = 0.057 ; Str. = Receptacle ; Axis = y ; Fl. accession = 10-s-79-27

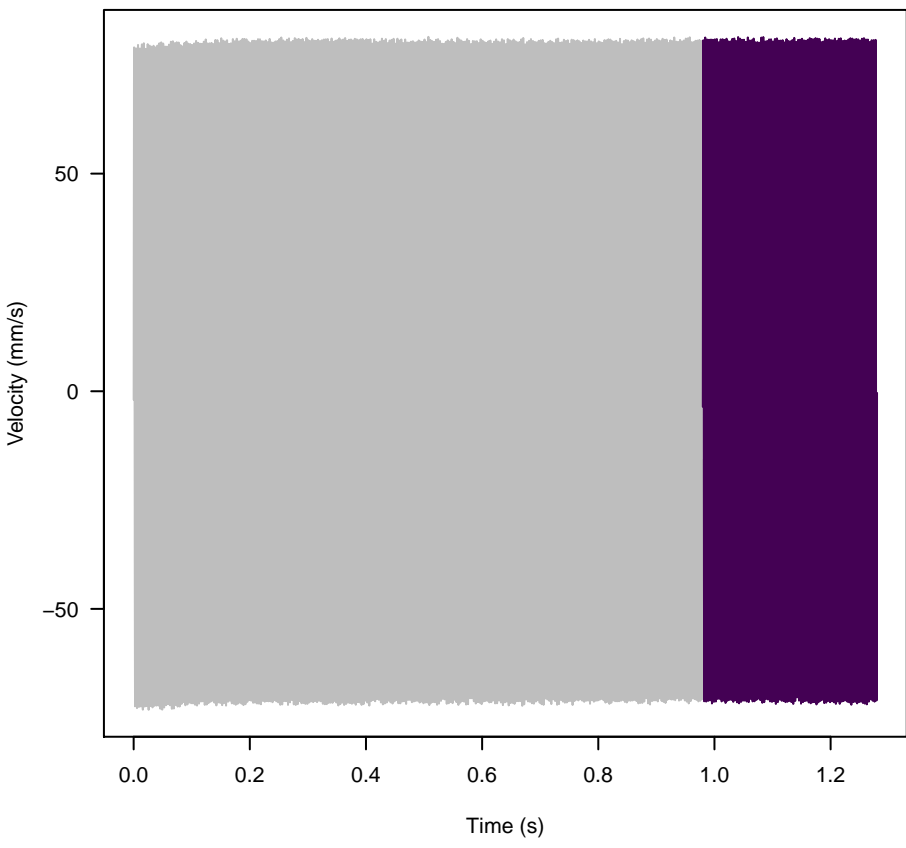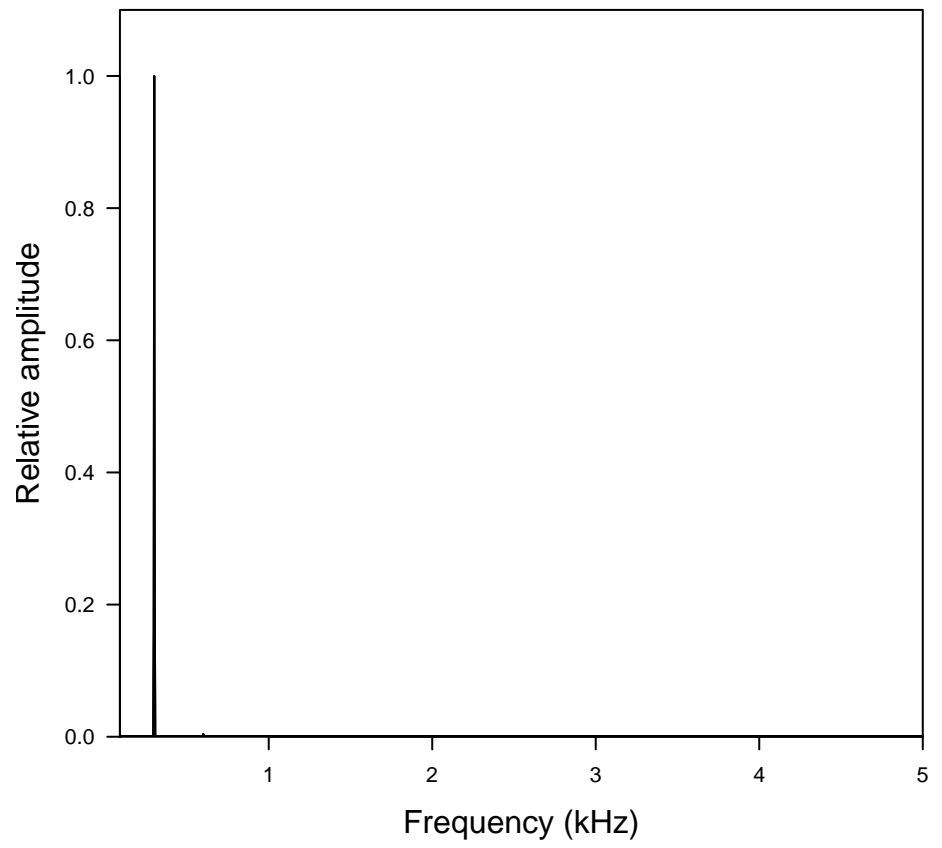

Vel. = 0.057 ; Str. = FA ; Axis = y ; Fl. accession = 10-s-79-27

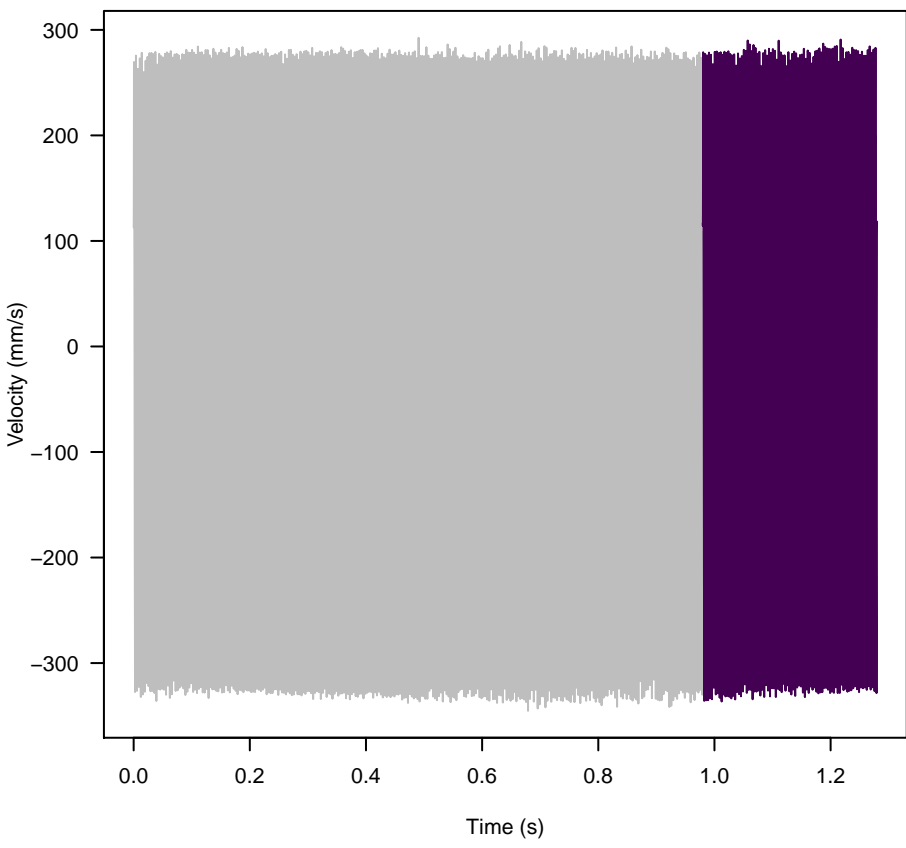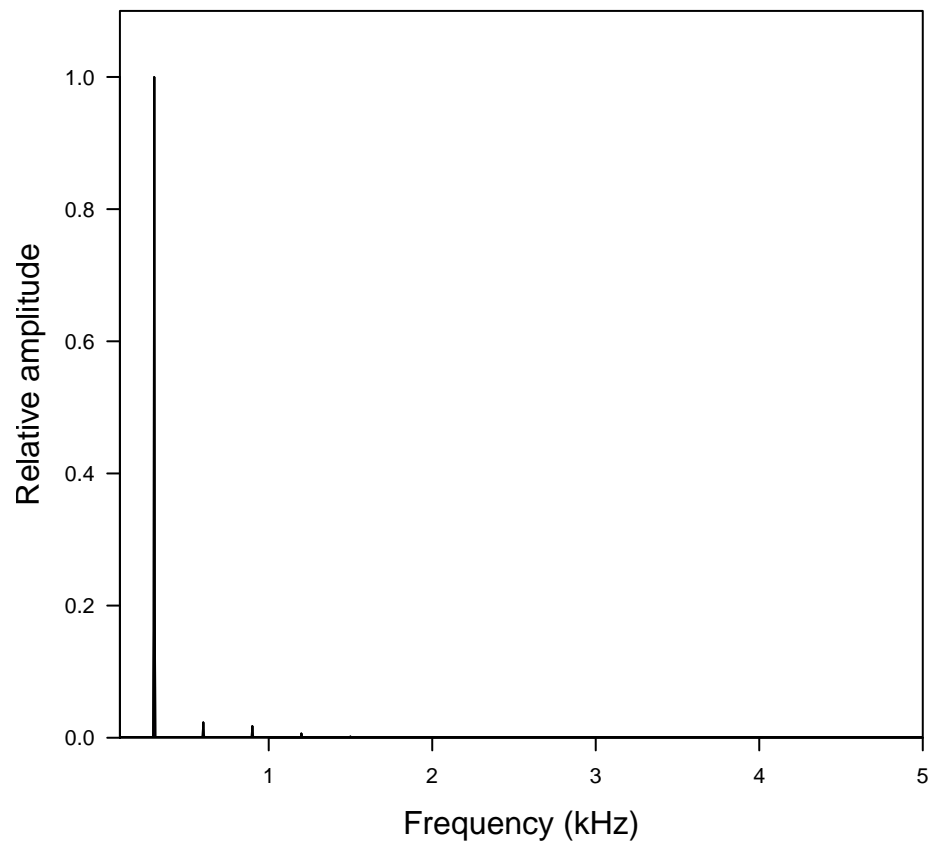

Vel. = 0.057 ; Str. = Receptacle ; Axis = y ; Fl. accession = 10-s-79-27

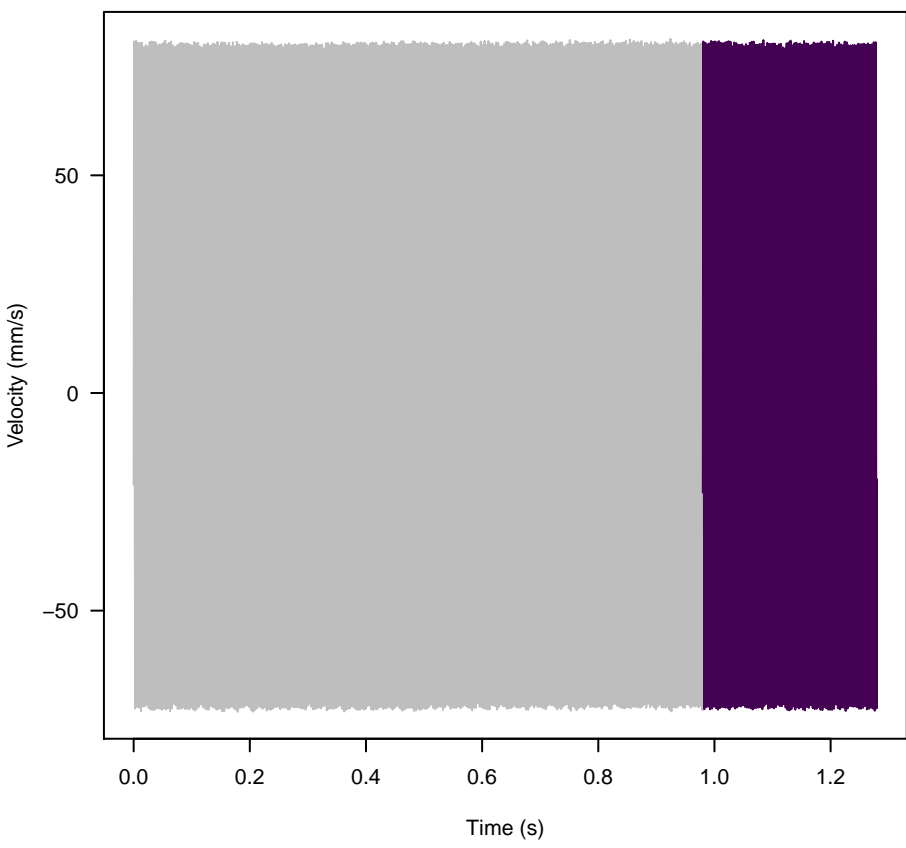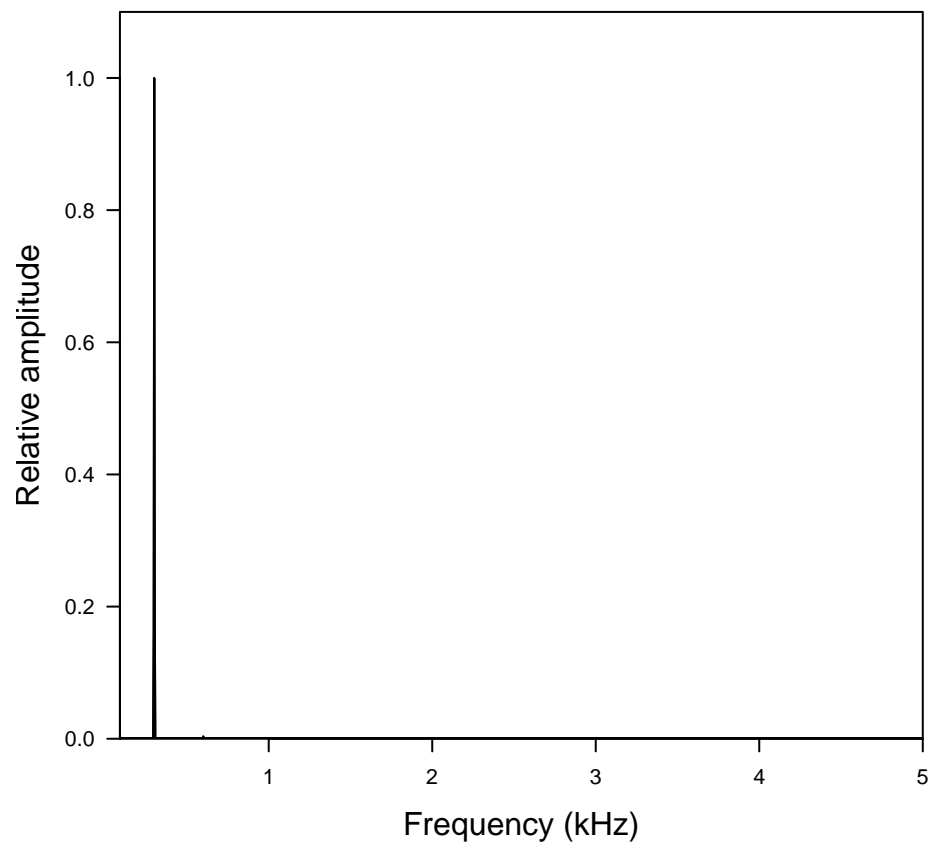

Vel. = 0.057 ; Str. = PA ; Axis = y ; Fl. accession = 10-s-79-27

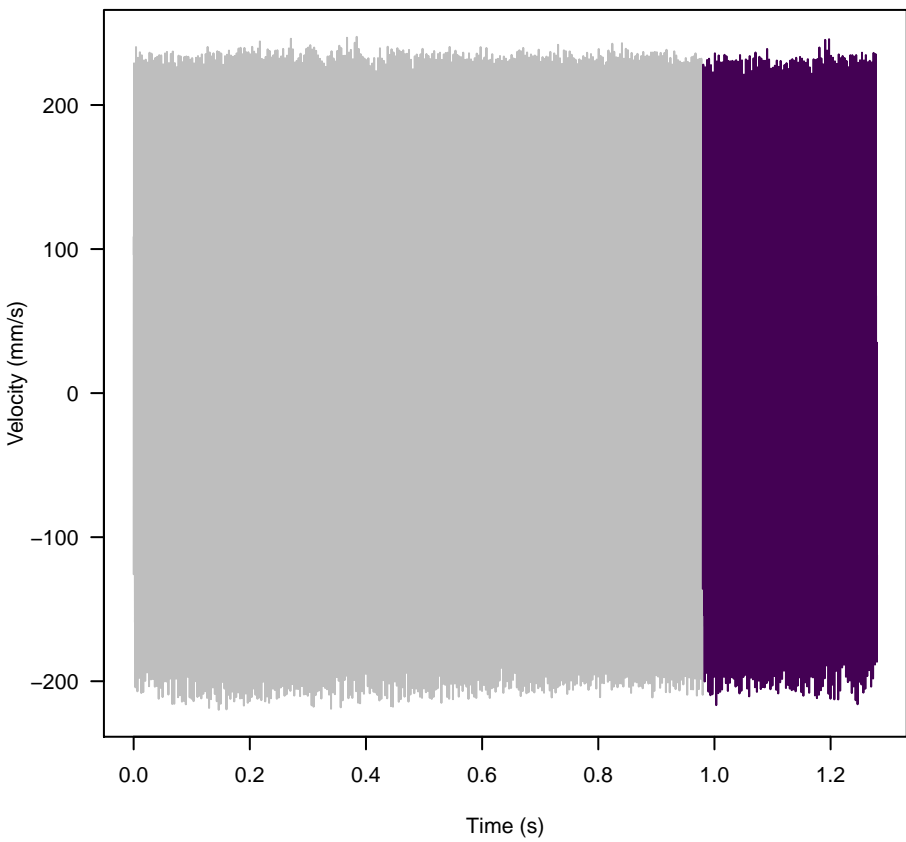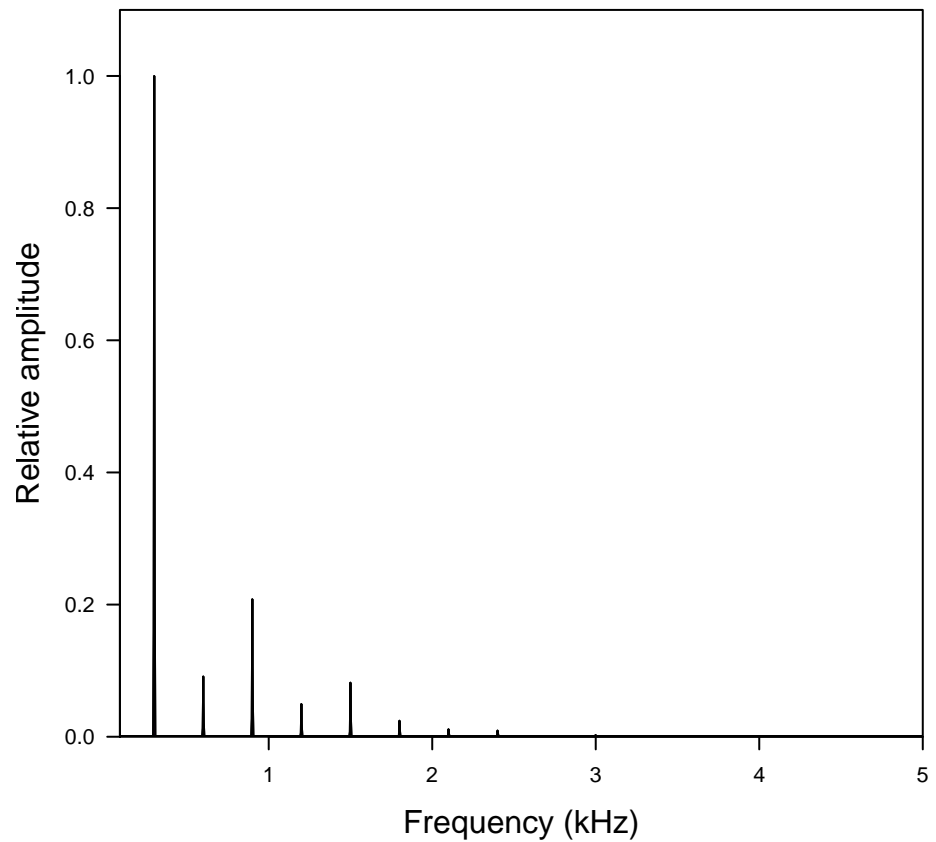

Vel. = 0.057 ; Str. = Receptacle ; Axis = y ; Fl. accession = 10-s-79-27

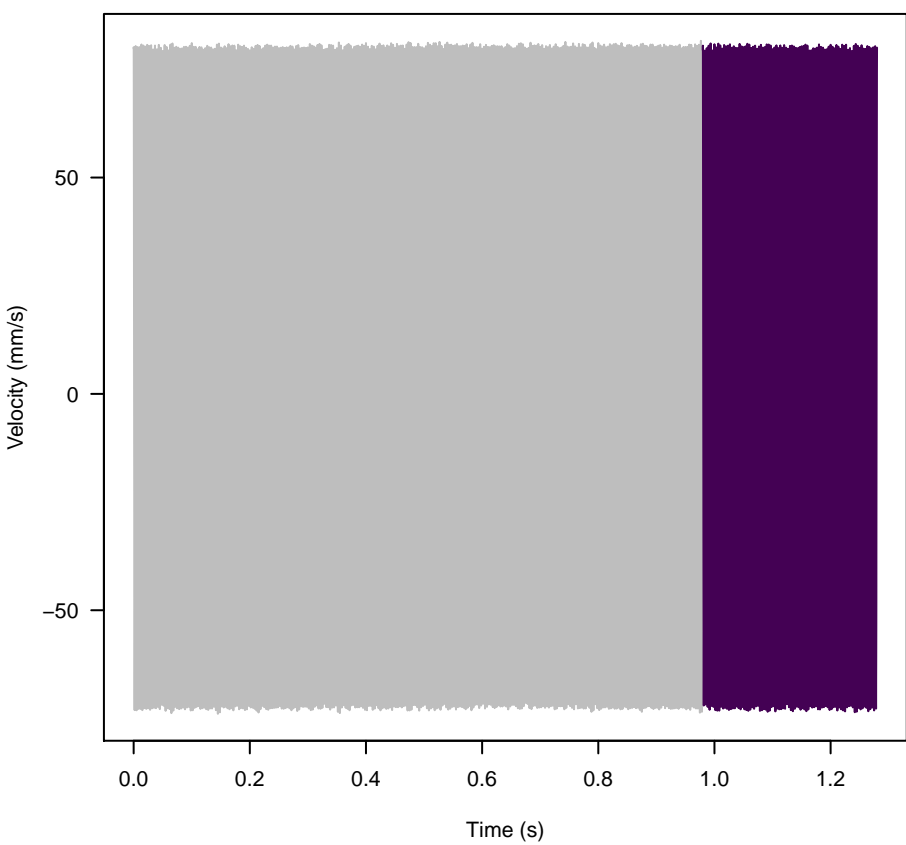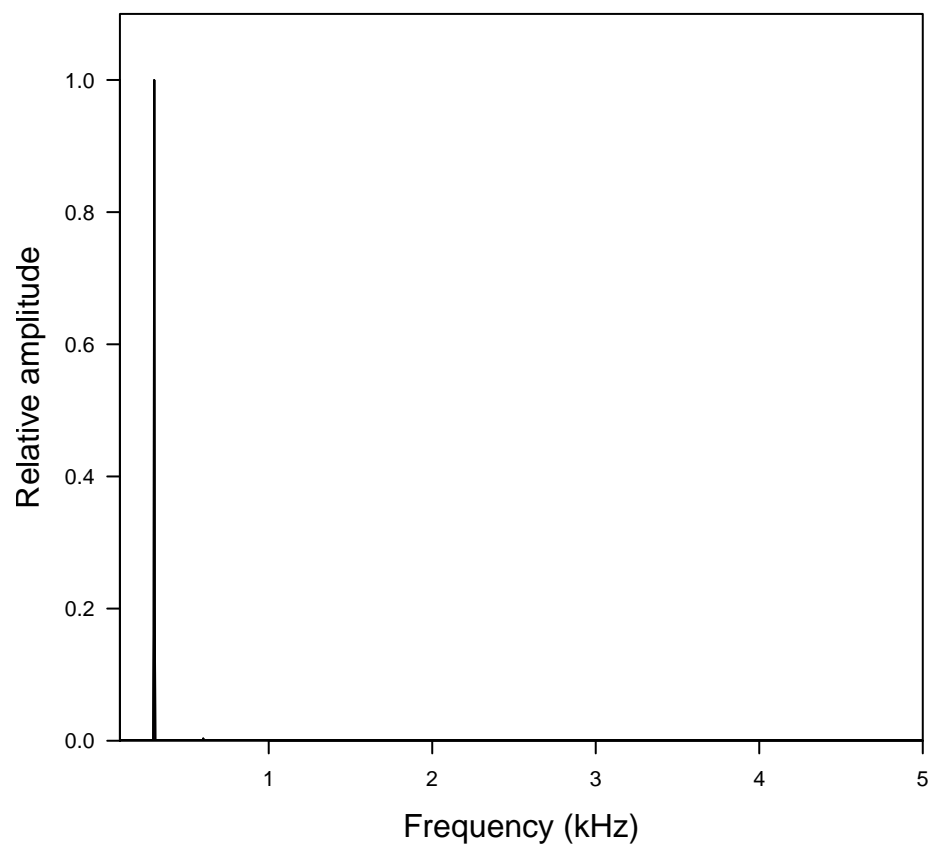

Vel. = 0.057 ; Str. = Corolla ; Axis = y ; Fl. accession = 10-s-81-11

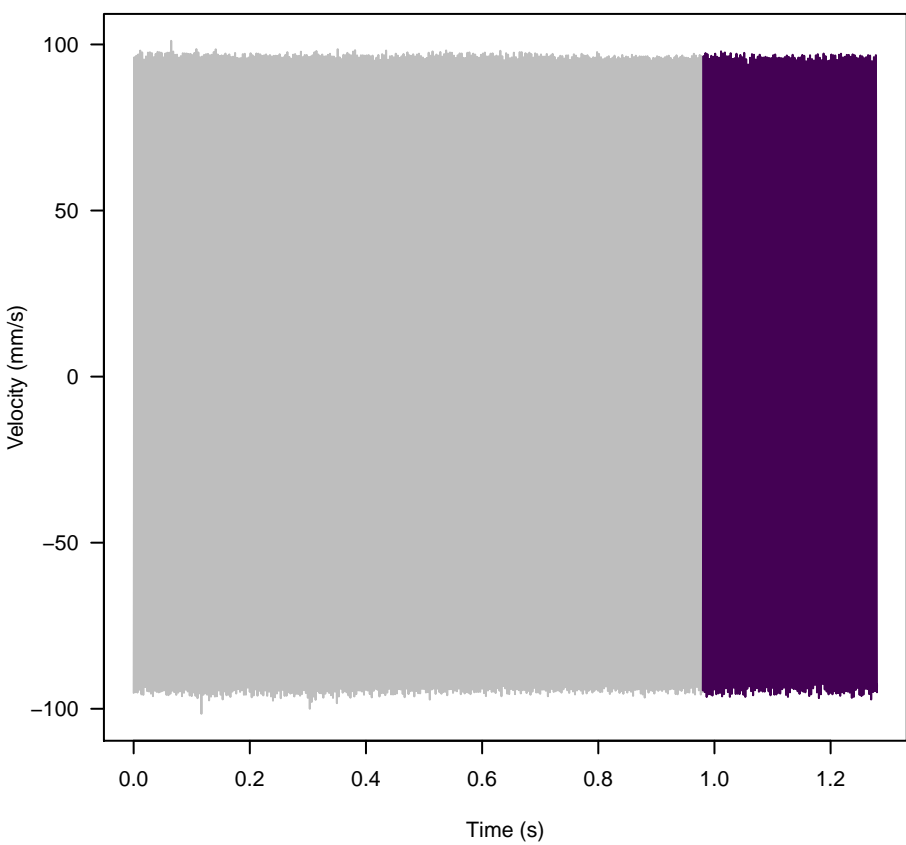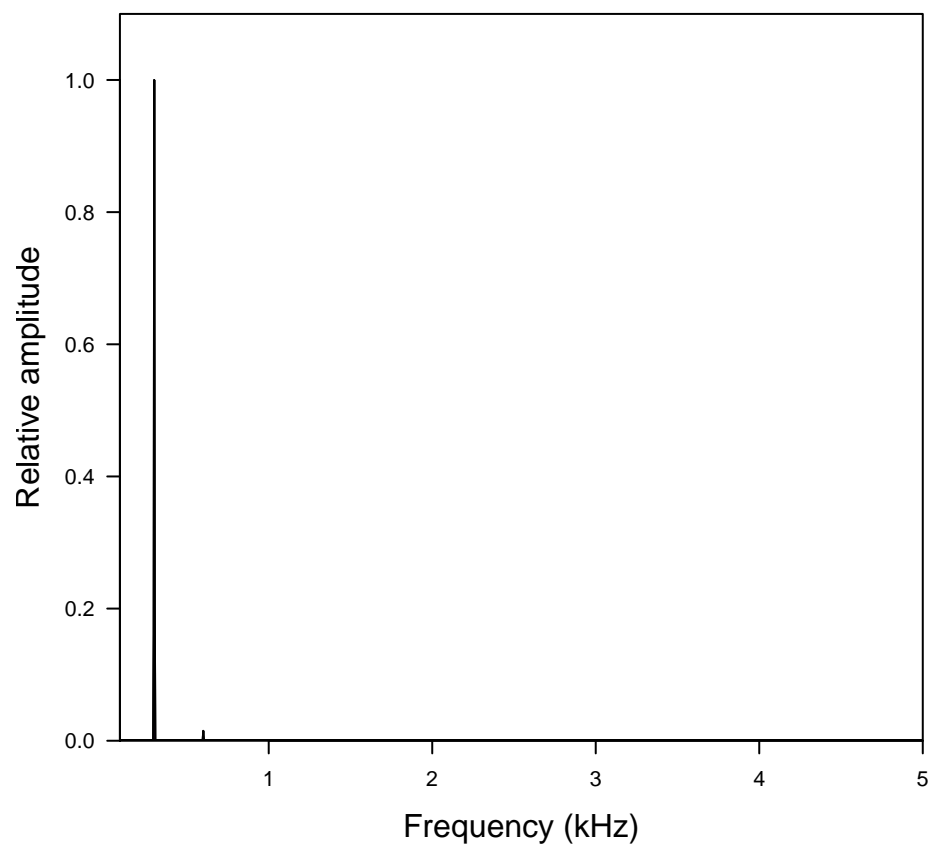

Vel. = 0.057 ; Str. = Receptacle ; Axis = y ; Fl. accession = 10-s-81-11

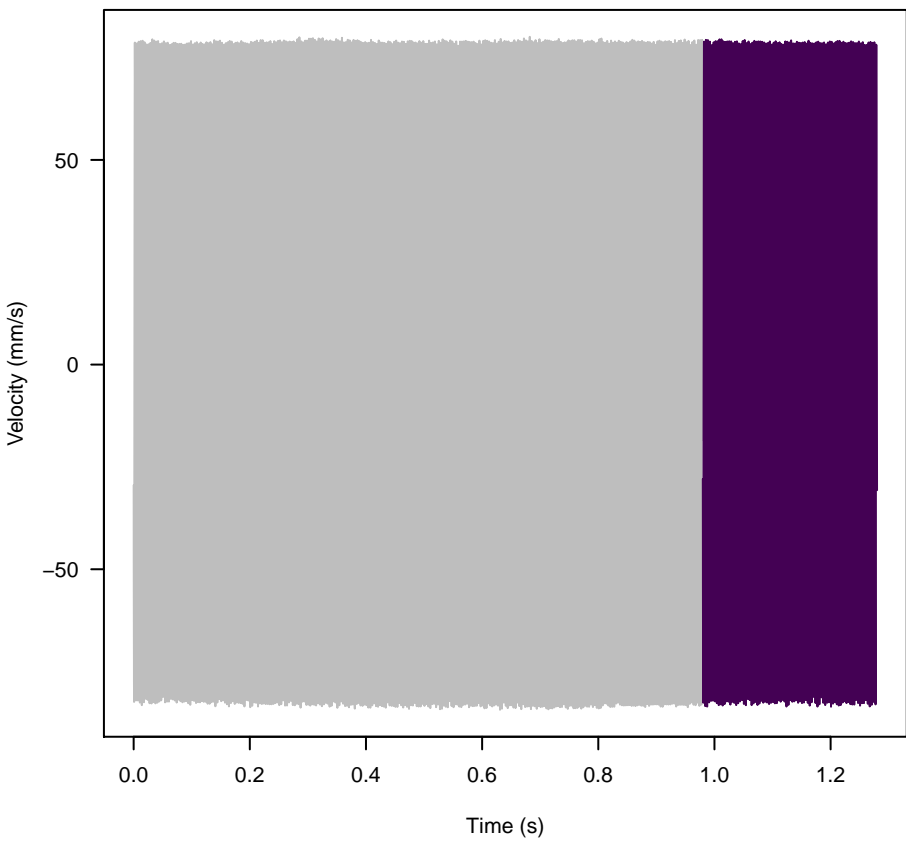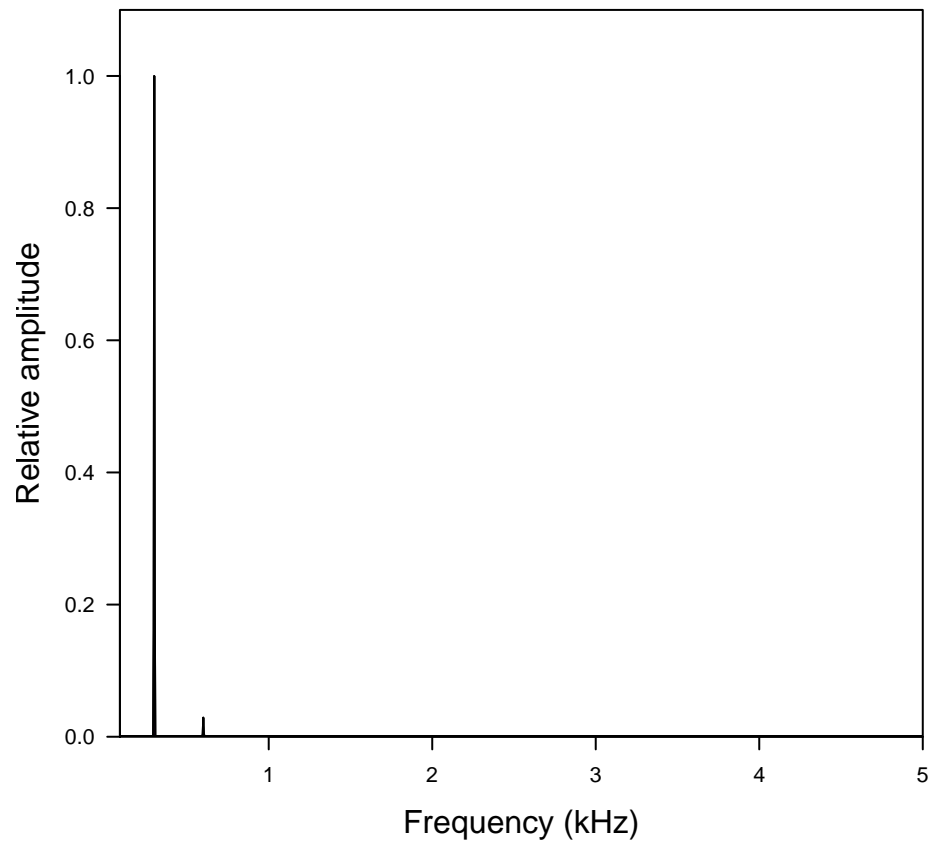

Vel. = 0.057 ; Str. = FA ; Axis = y ; Fl. accession = 10-s-81-11

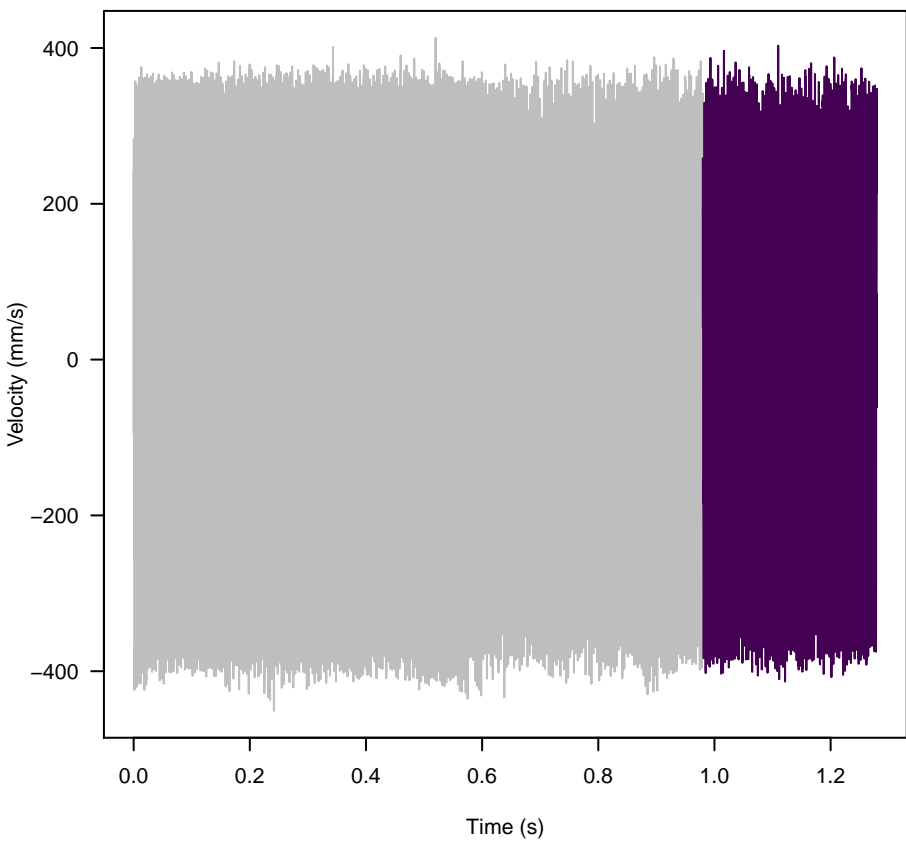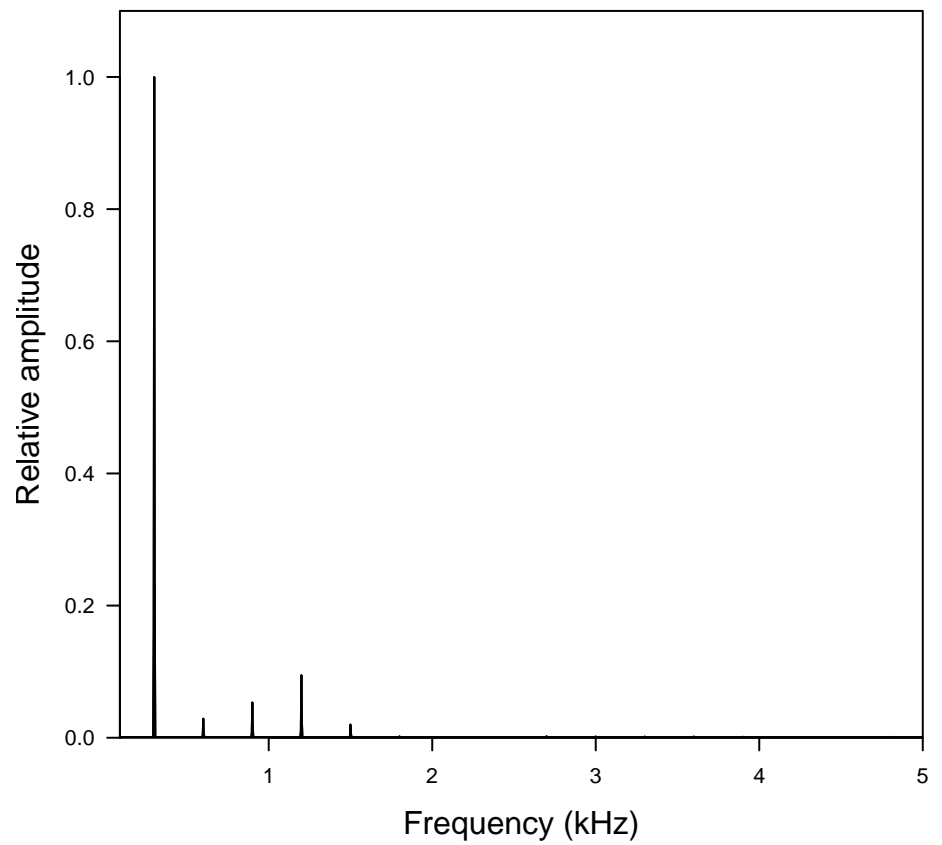

Vel. = 0.057 ; Str. = Receptacle ; Axis = y ; Fl. accession = 10-s-81-11

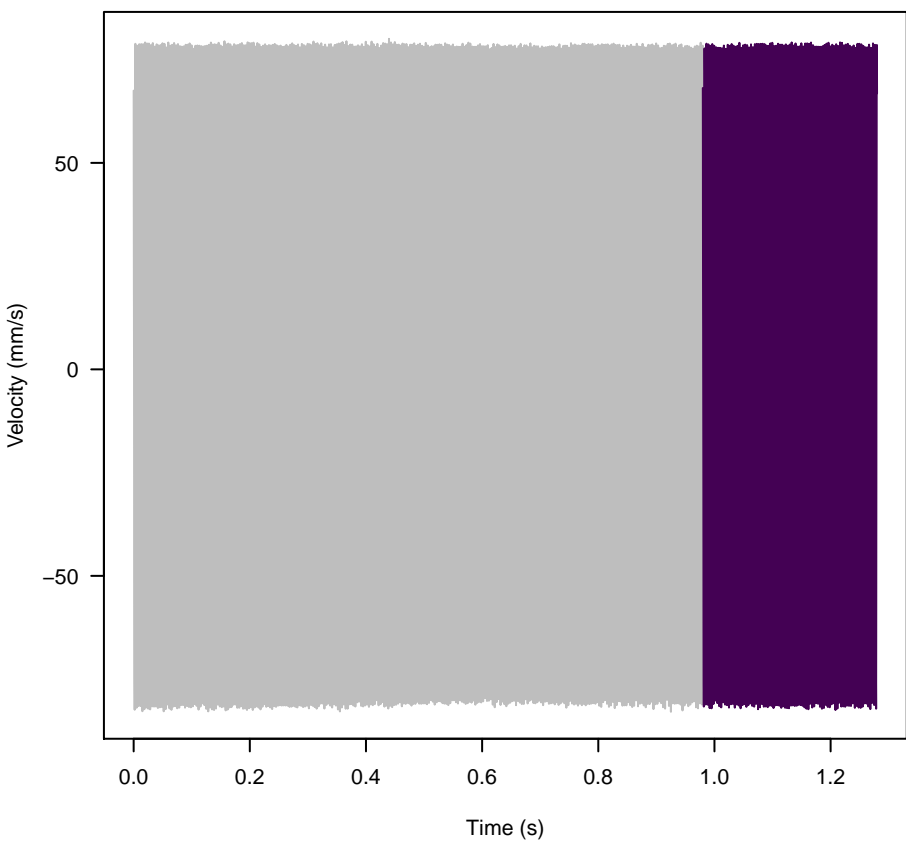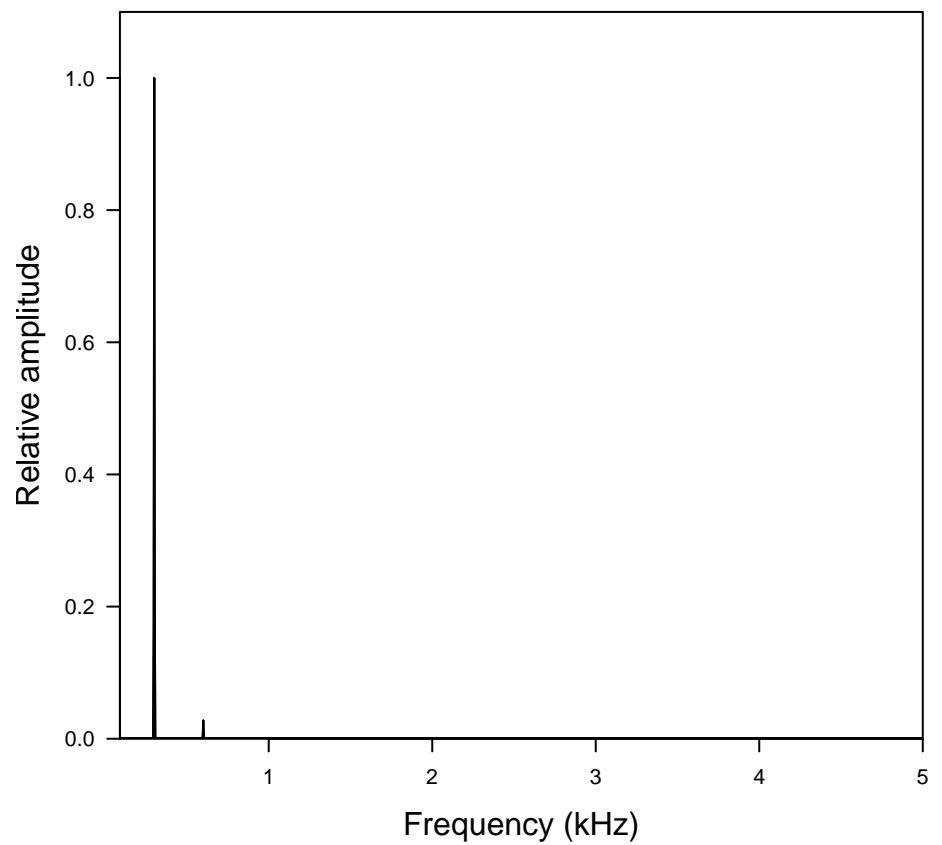

Vel. = 0.057 ; Str. = PA ; Axis = y ; Fl. accession = 10-s-81-11

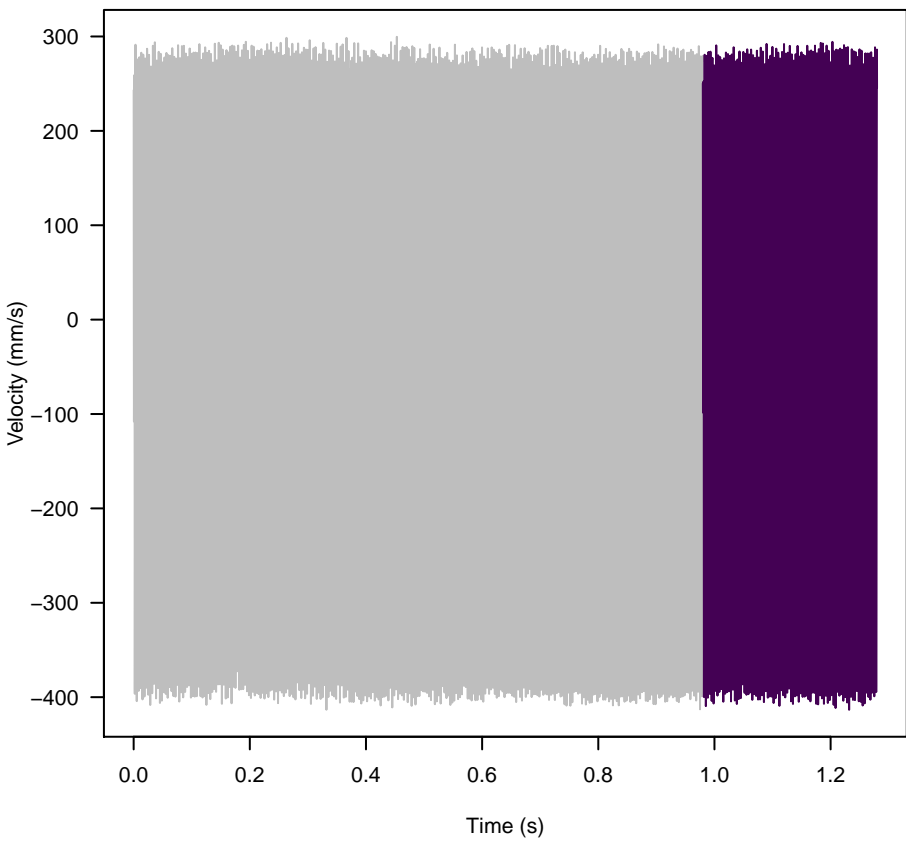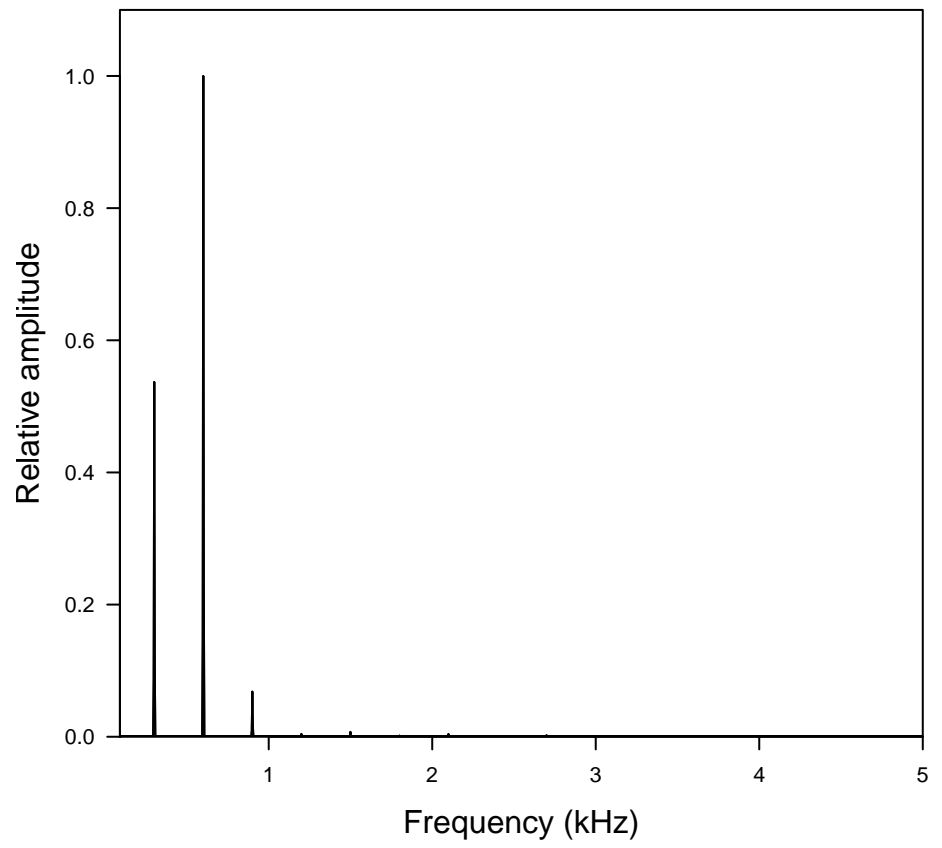

Vel. = 0.057 ; Str. = Receptacle ; Axis = y ; Fl. accession = 10-s-81-11

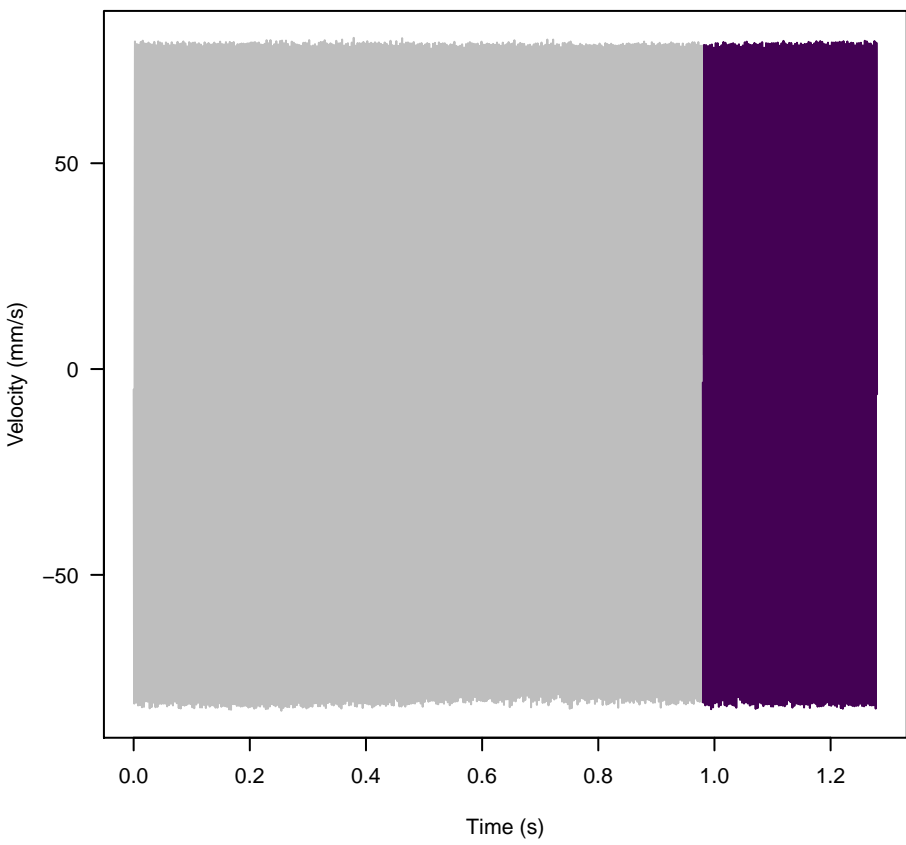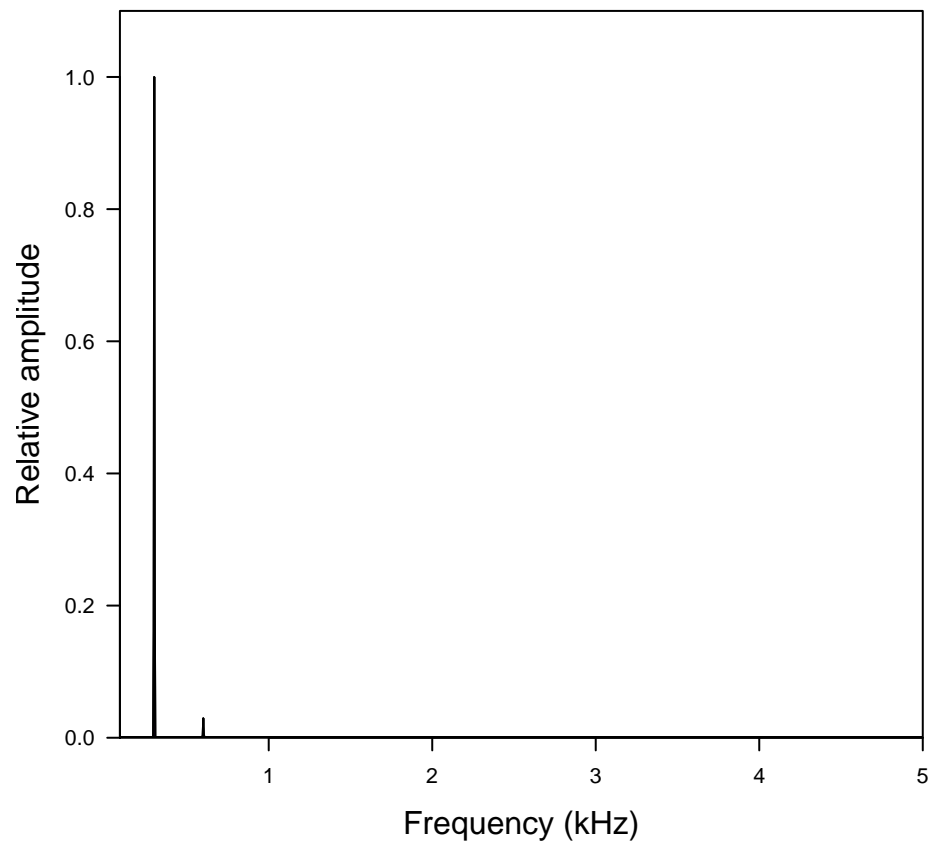

Vel. = 0.028 ; Str. = PA ; Axis = y ; Fl. accession = 10-s-81-11

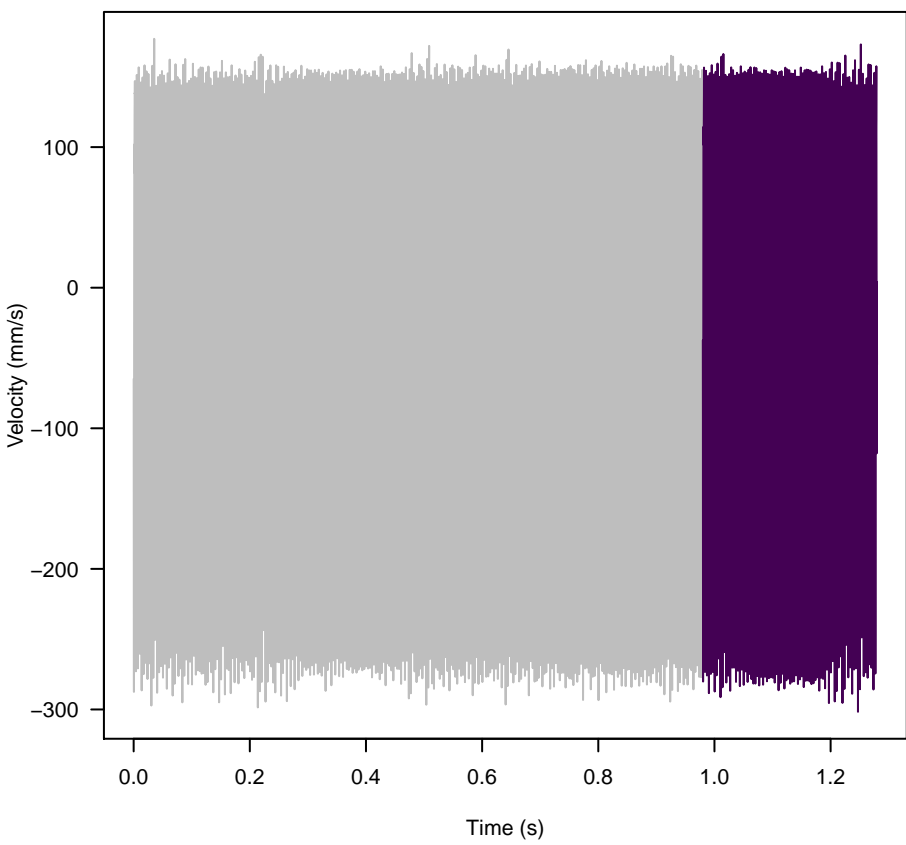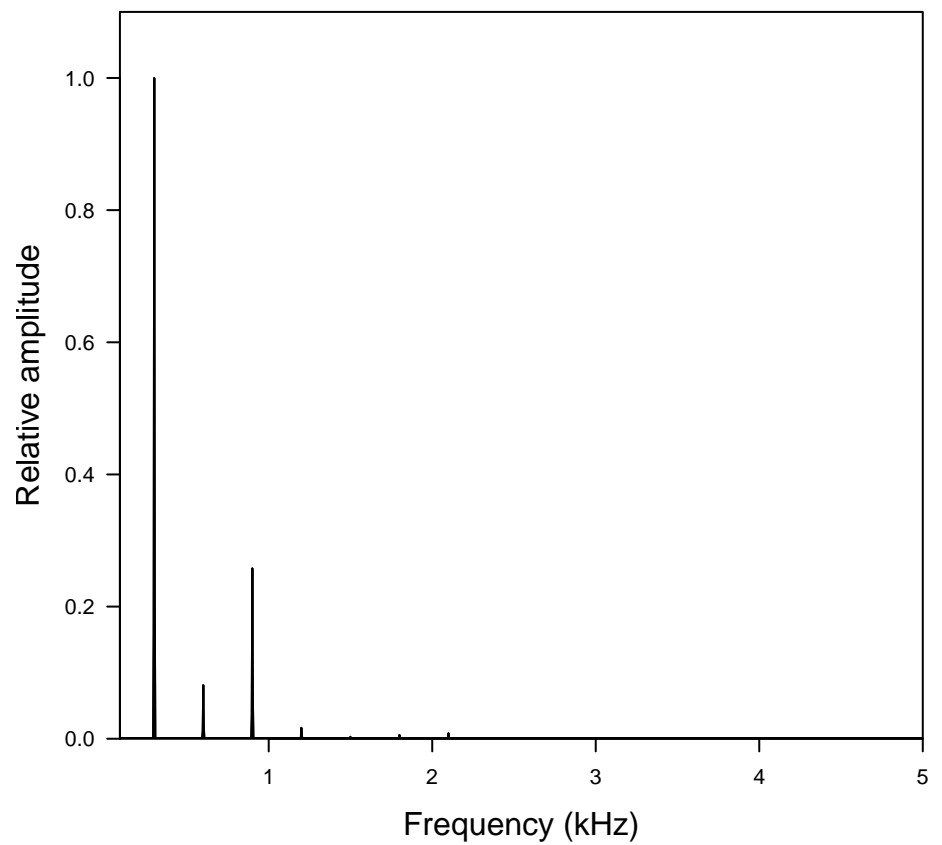

Vel. = 0.028 ; Str. = Receptacle ; Axis = y ; Fl. accession = 10-s-81-11

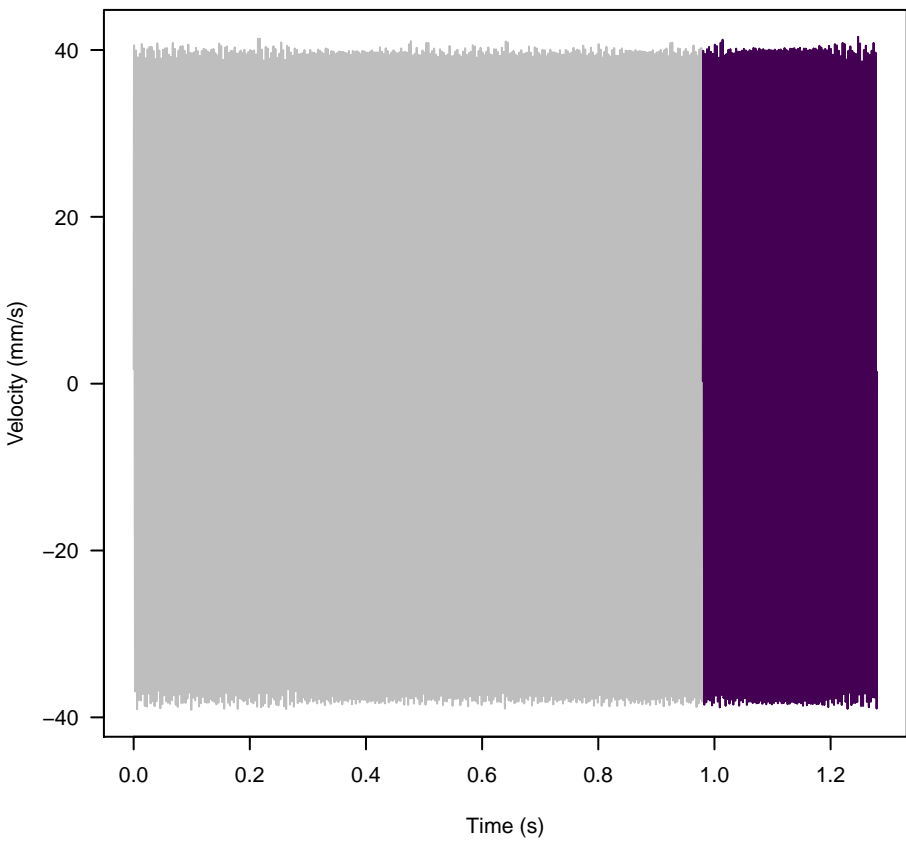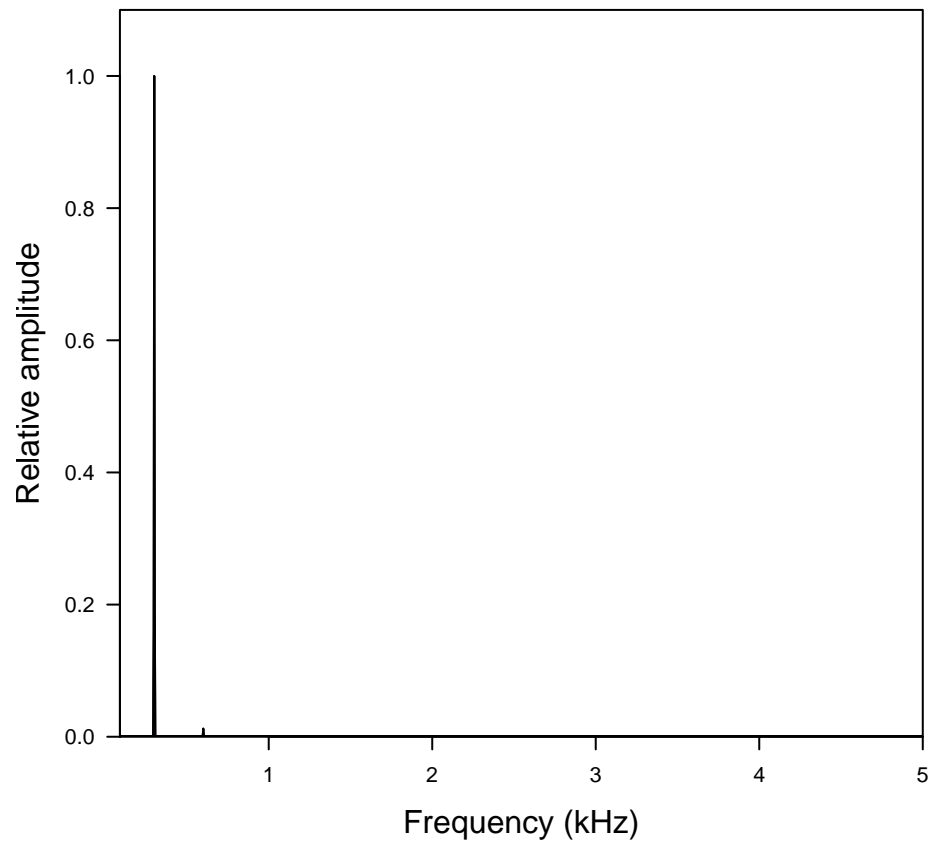

Vel. = 0.028 ; Str. = FA ; Axis = y ; Fl. accession = 10-s-81-11

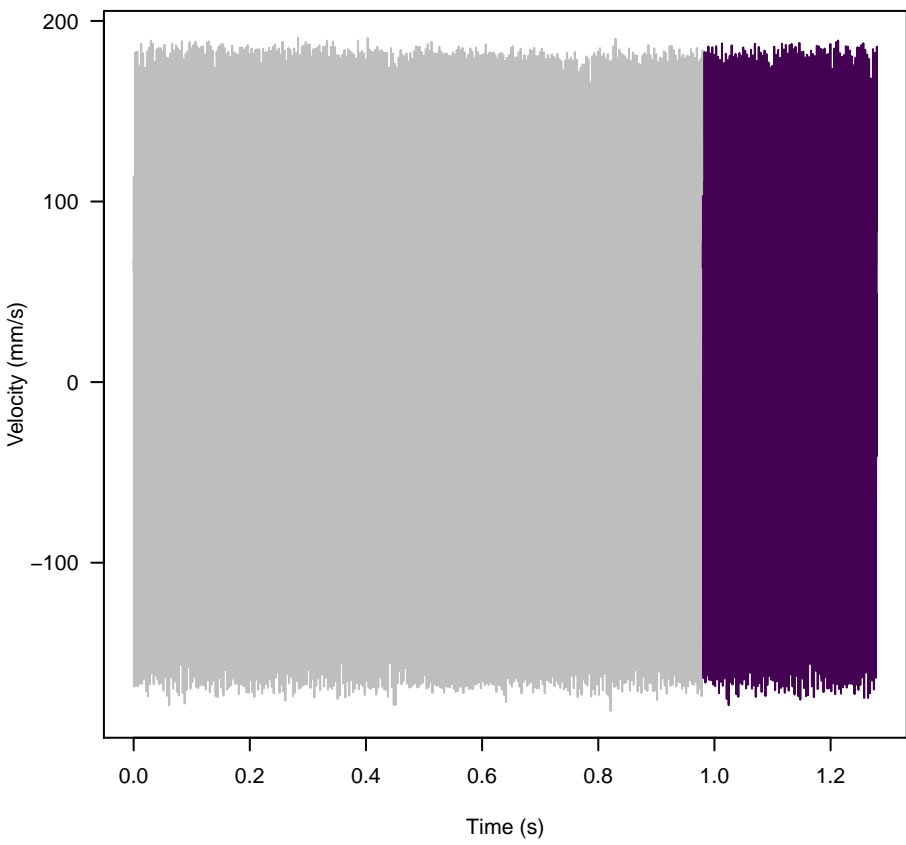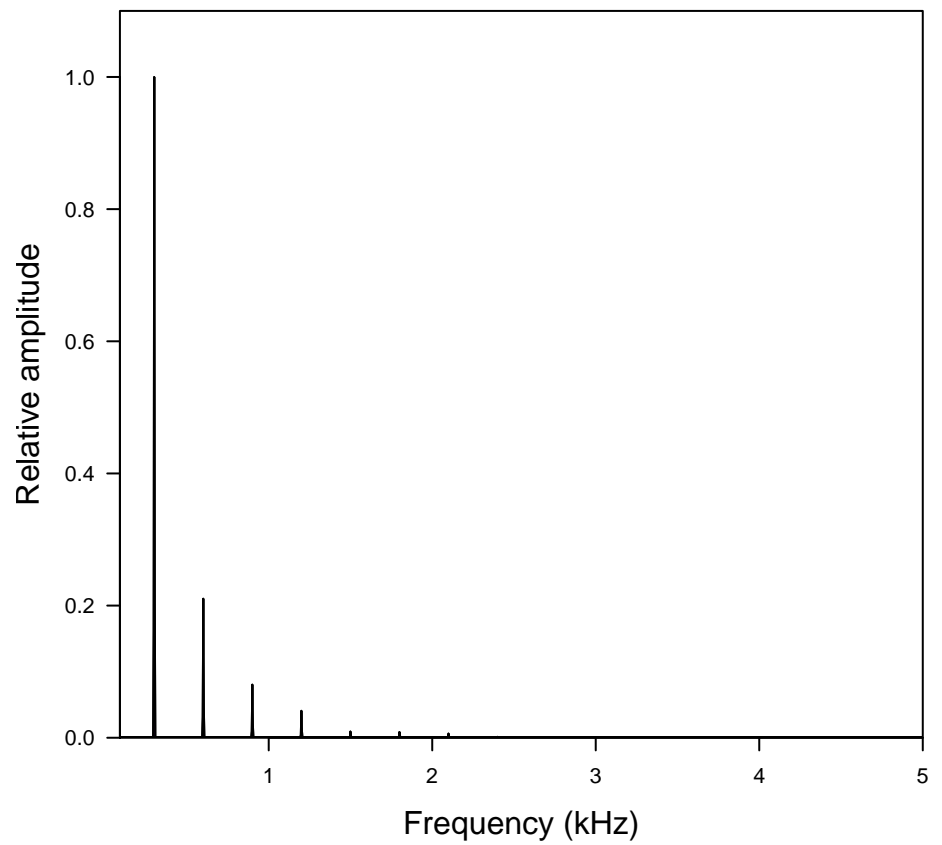

Vel. = 0.028 ; Str. = Receptacle ; Axis = y ; Fl. accession = 10-s-81-11

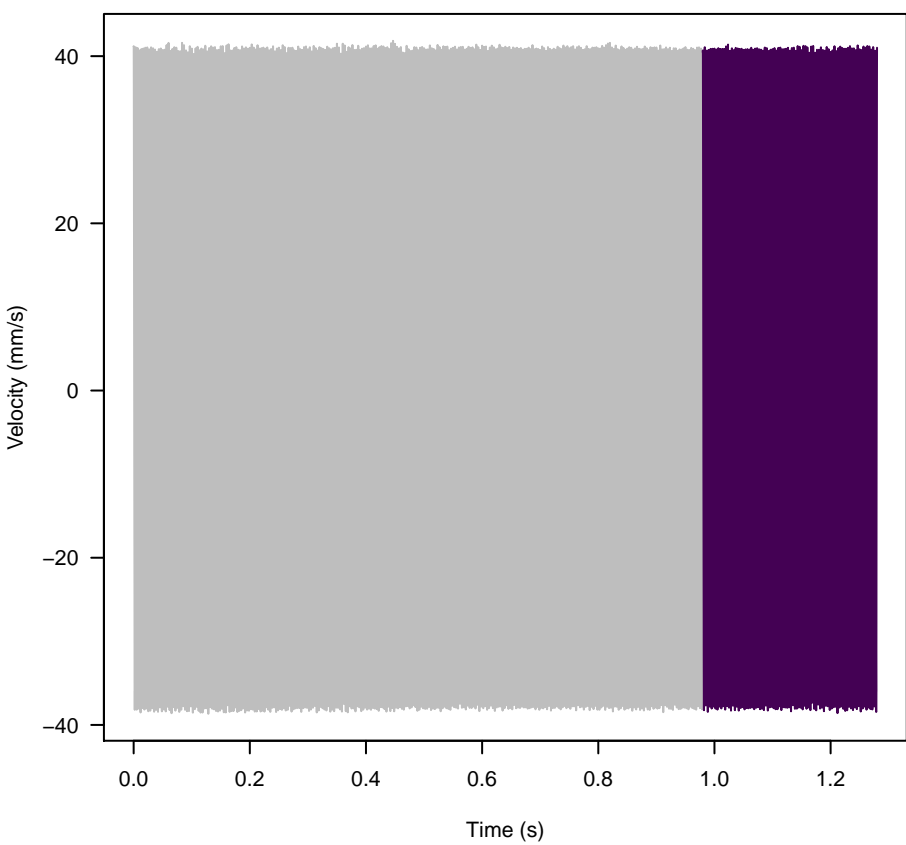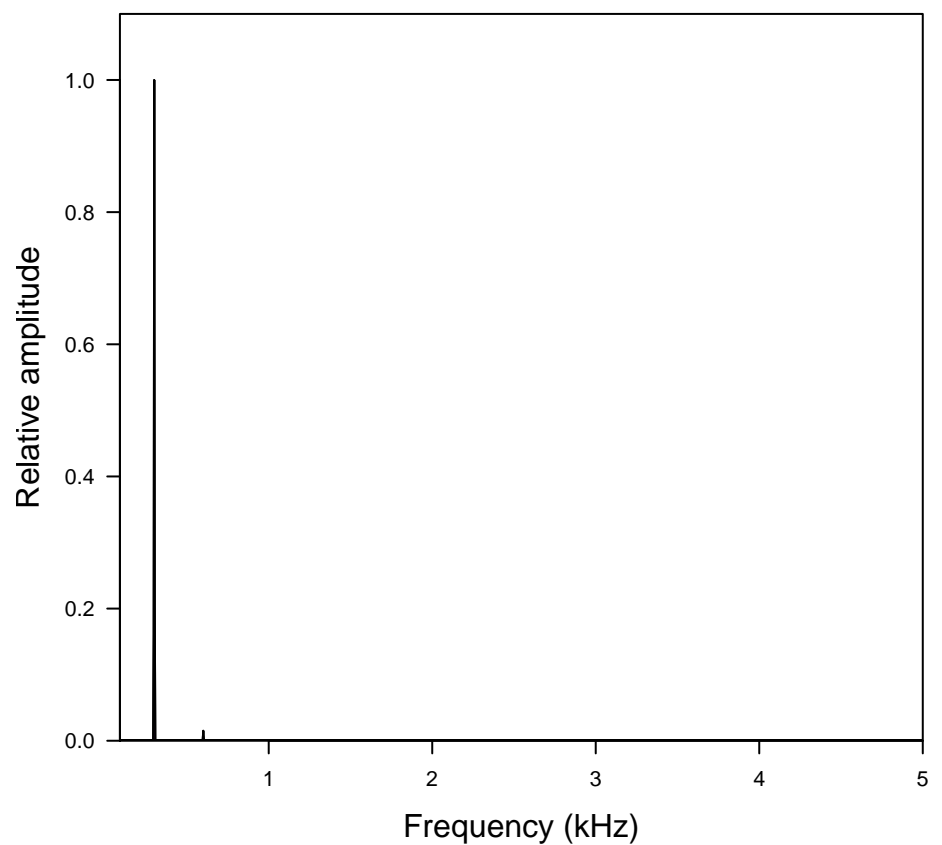

Vel. = 0.028 ; Str. = Corolla ; Axis = y ; Fl. accession = 10-s-81-11

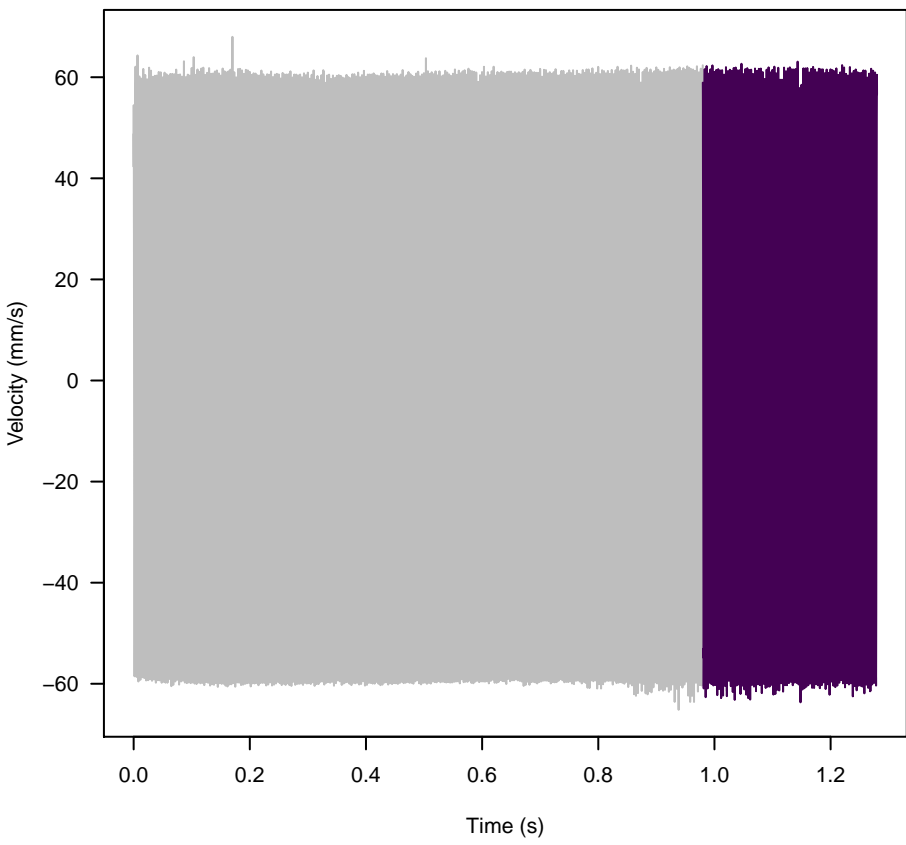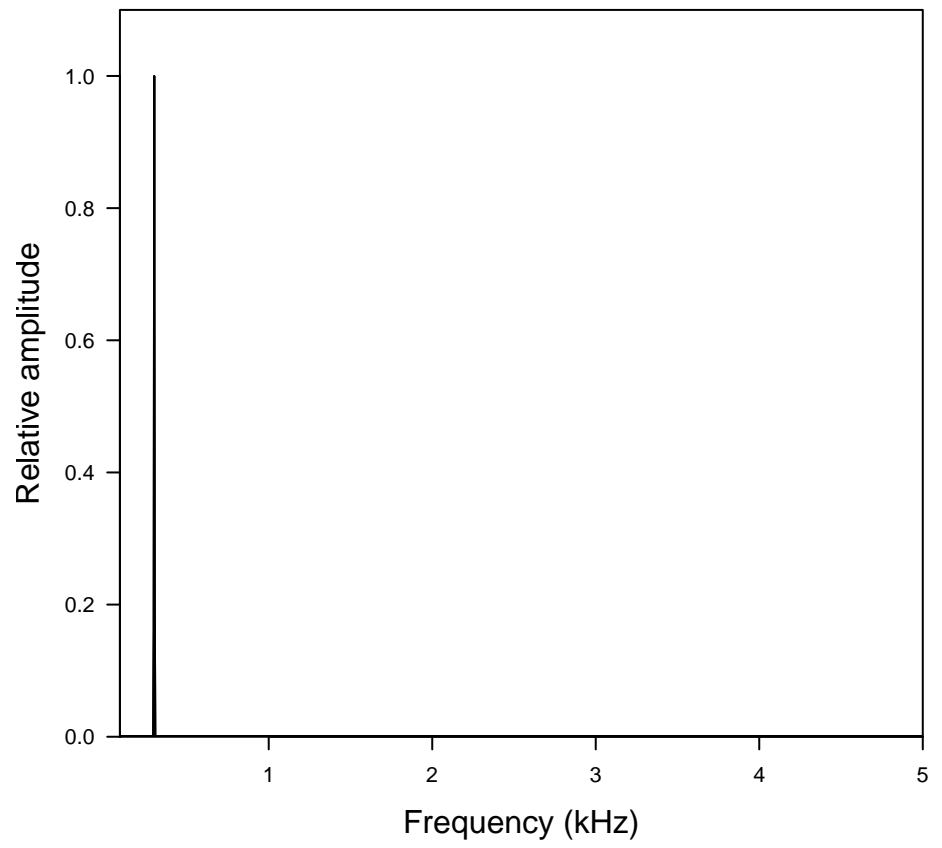

Vel. = 0.028 ; Str. = Receptacle ; Axis = y ; Fl. accession = 10-s-81-11

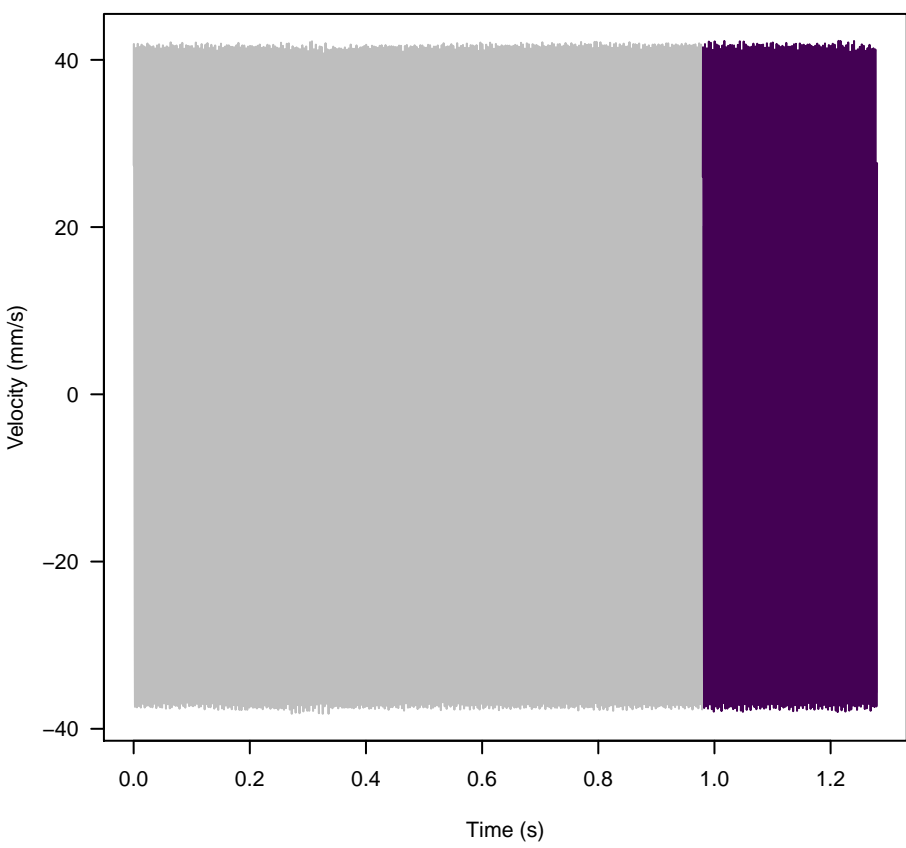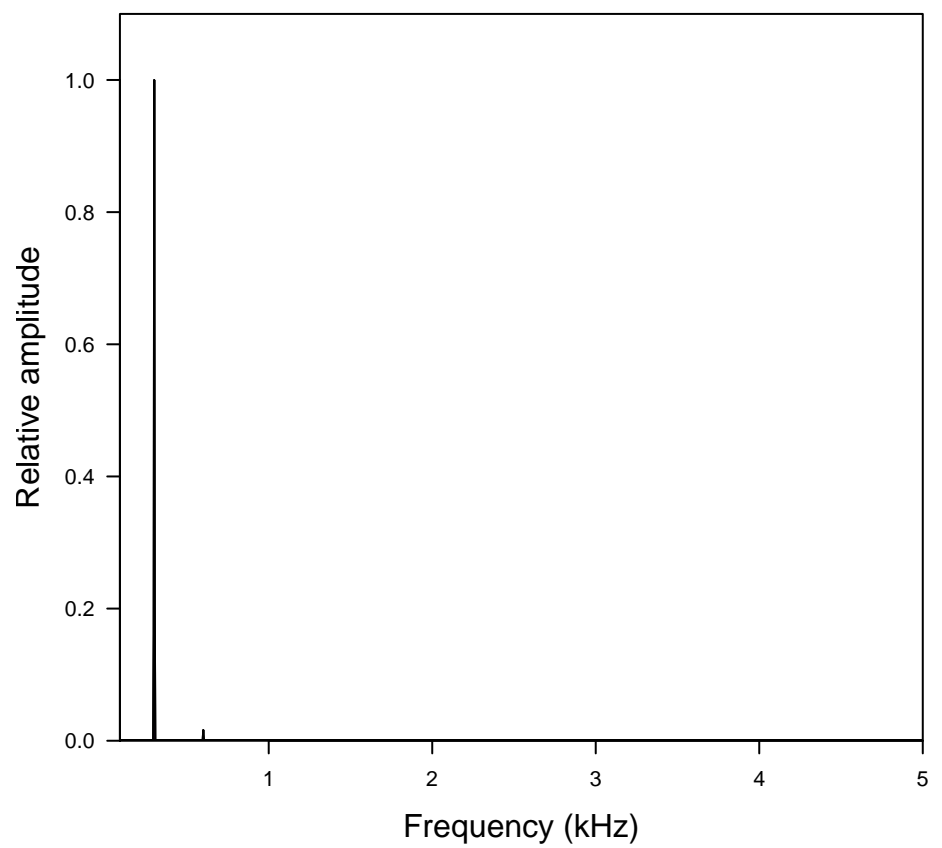

Vel. = 0.014 ; Str. = Corolla ; Axis = y ; Fl. accession = 10-s-81-11

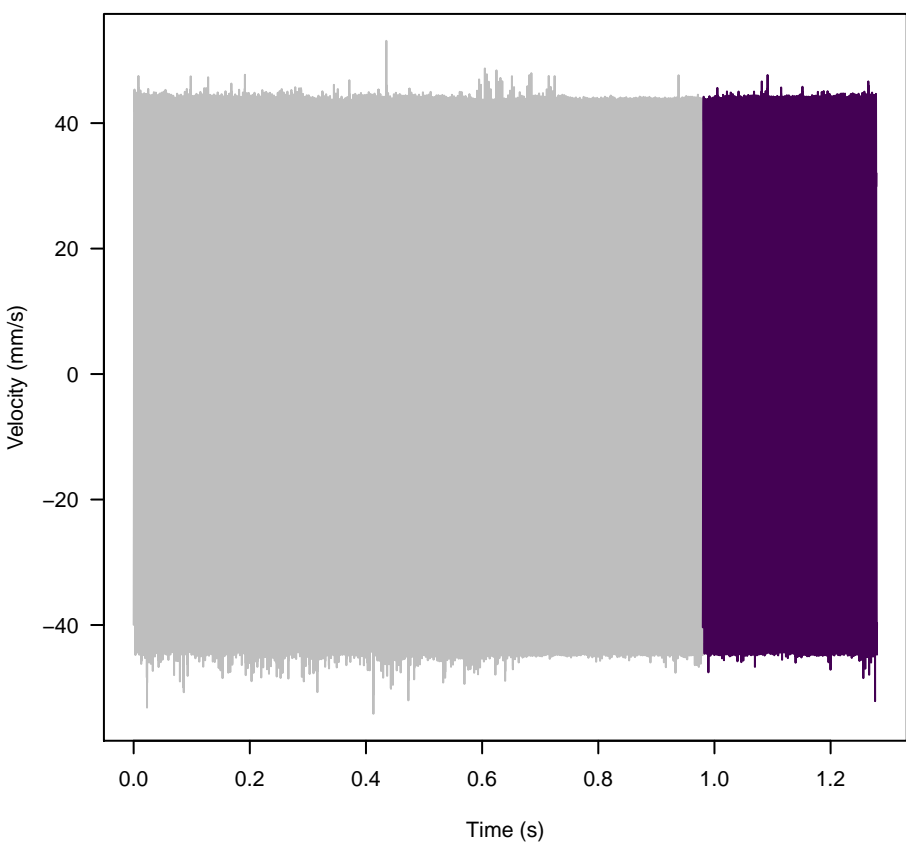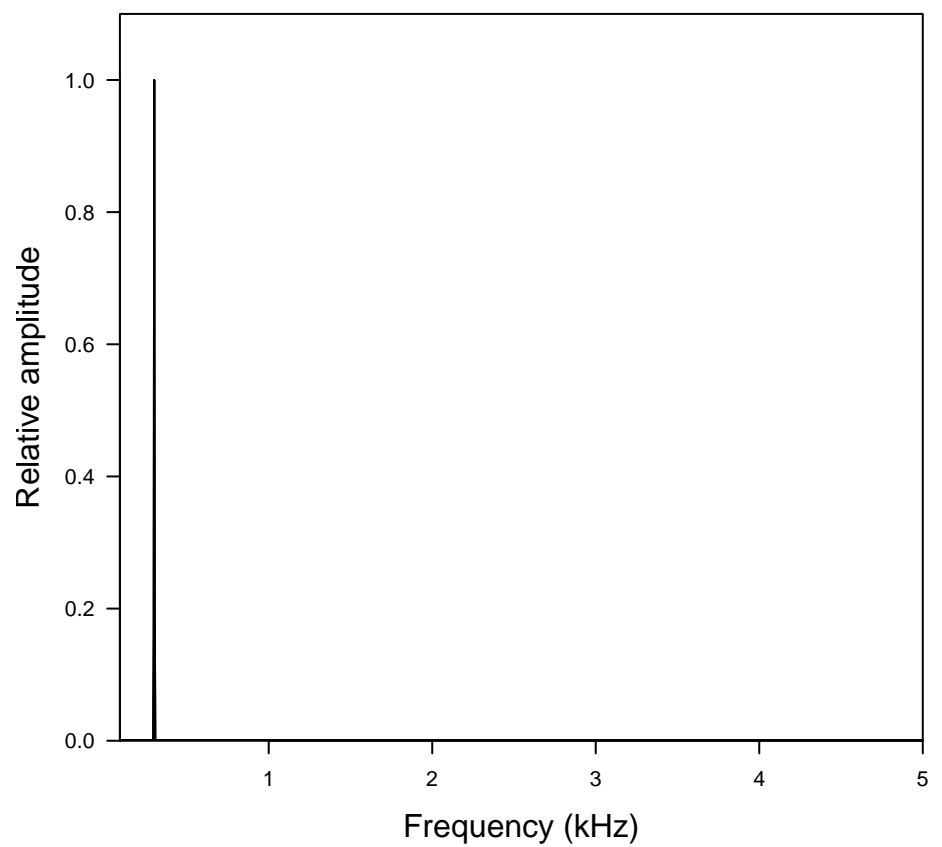

Vel. = 0.014 ; Str. = Receptacle ; Axis = y ; Fl. accession = 10-s-81-11

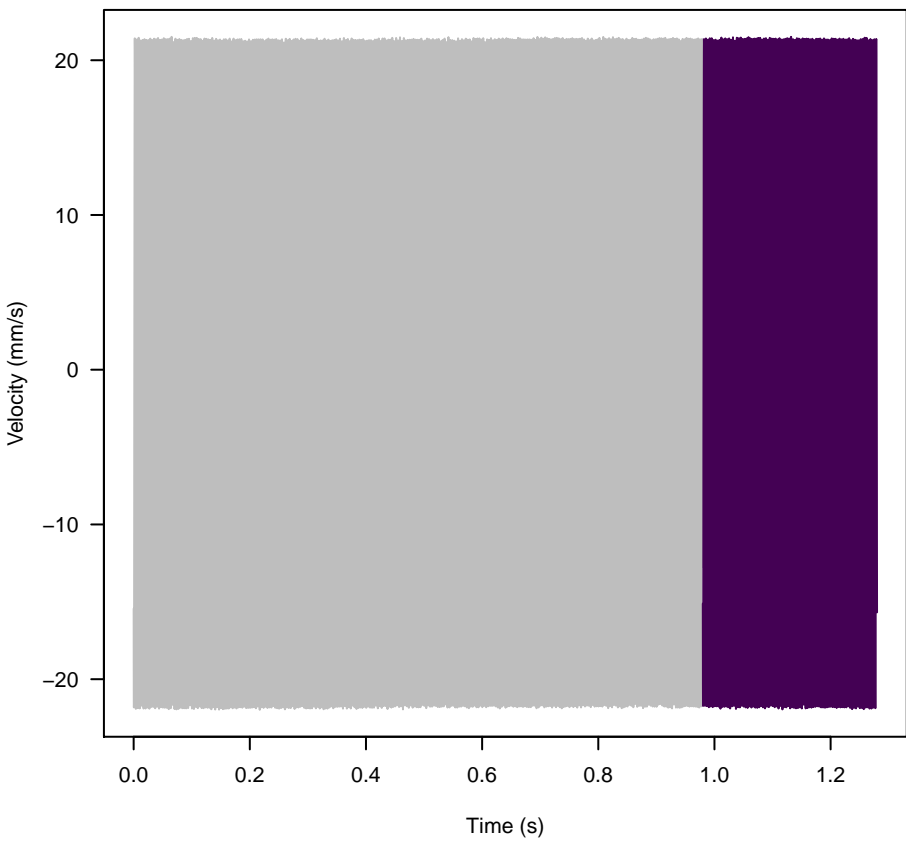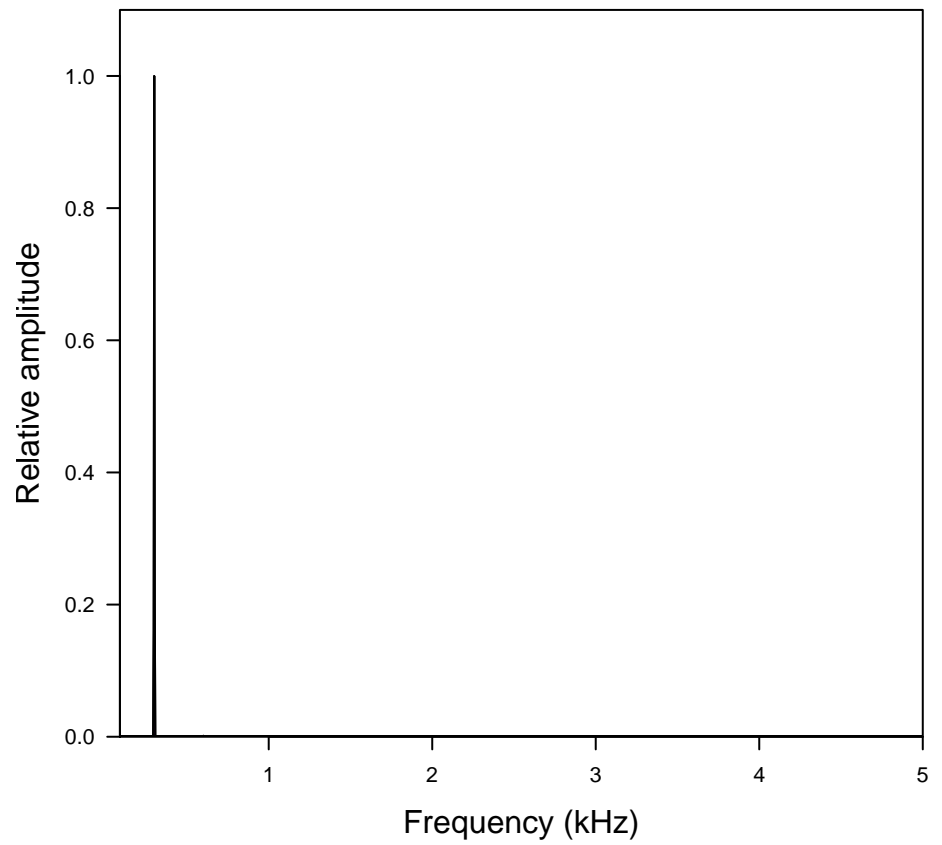

Vel. = 0.014 ; Str. = FA ; Axis = y ; Fl. accession = 10-s-81-11

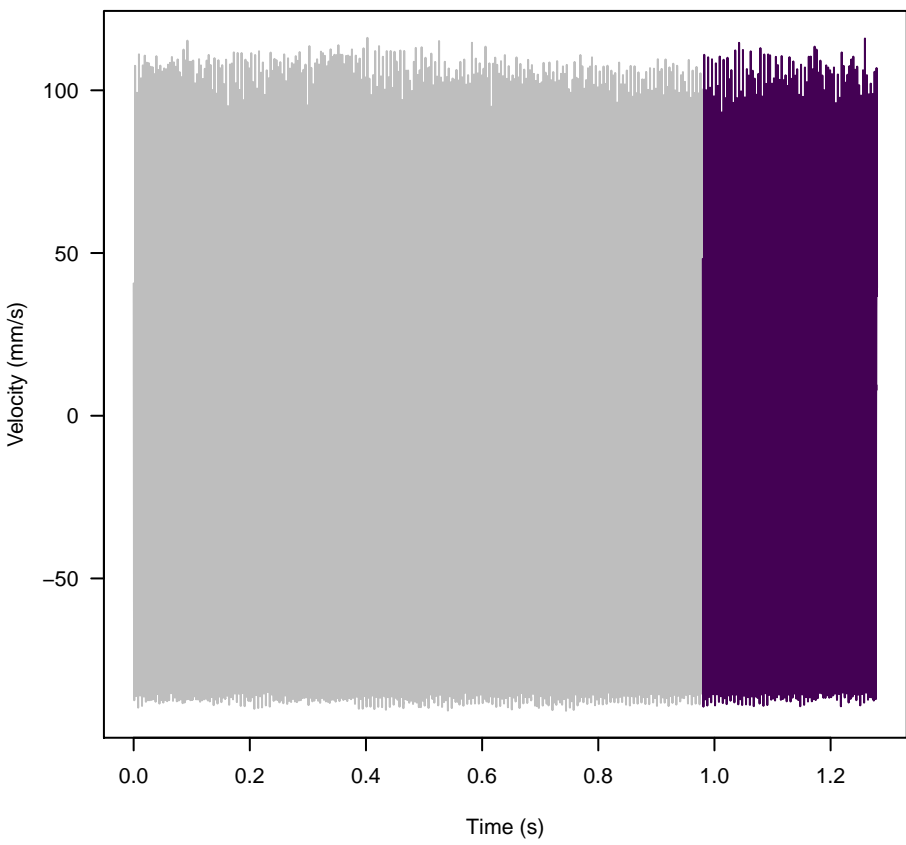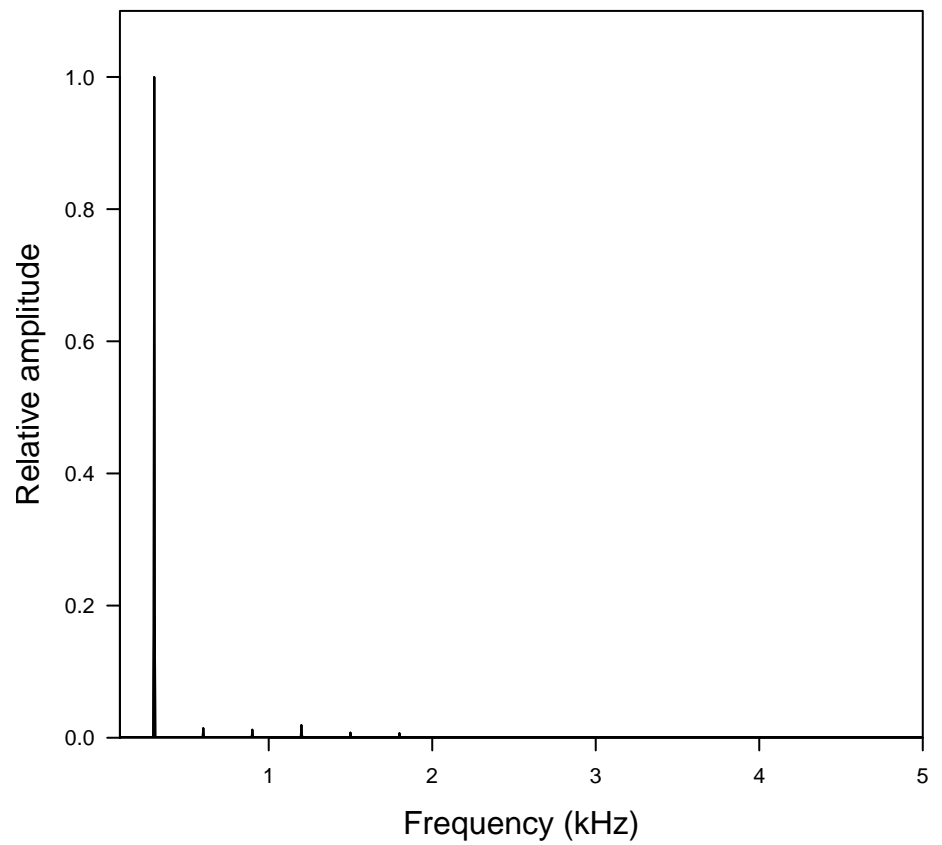

Vel. = 0.014 ; Str. = Receptacle ; Axis = y ; Fl. accession = 10-s-81-11

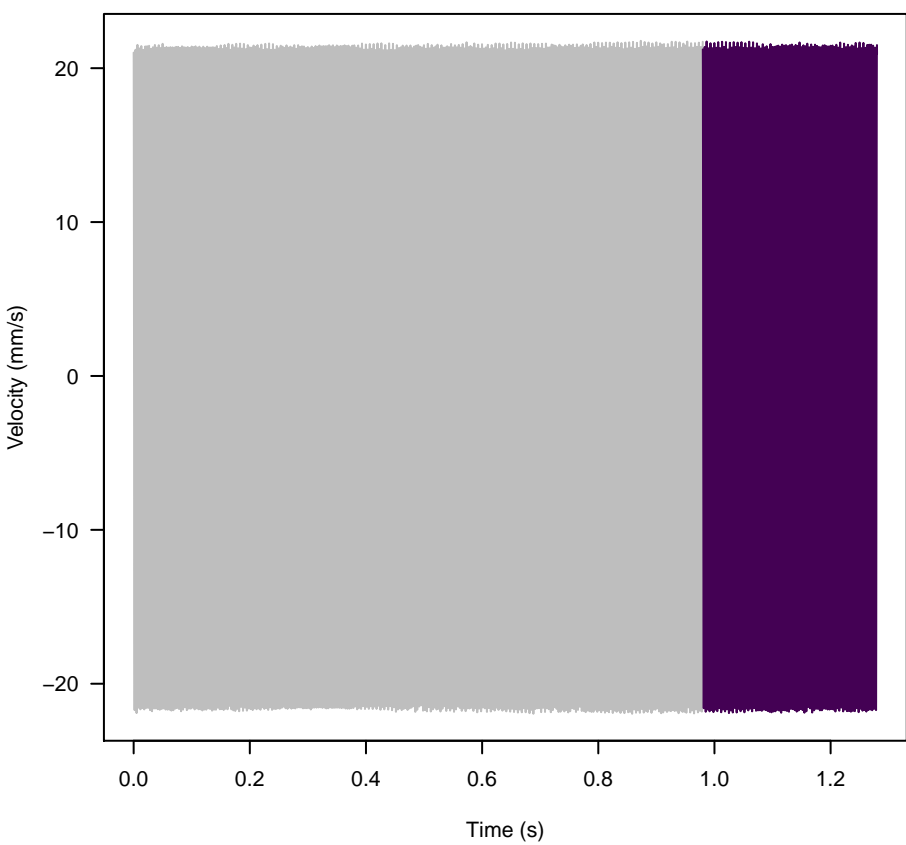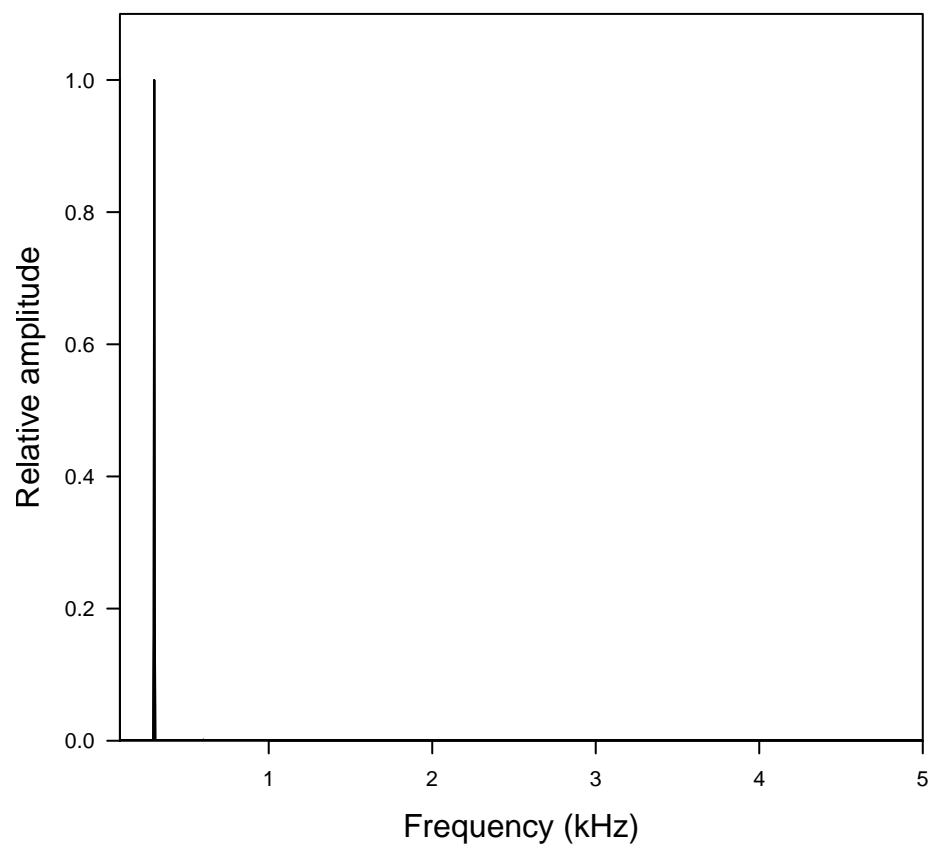

Vel. = 0.014 ; Str. = PA ; Axis = y ; Fl. accession = 10-s-81-11

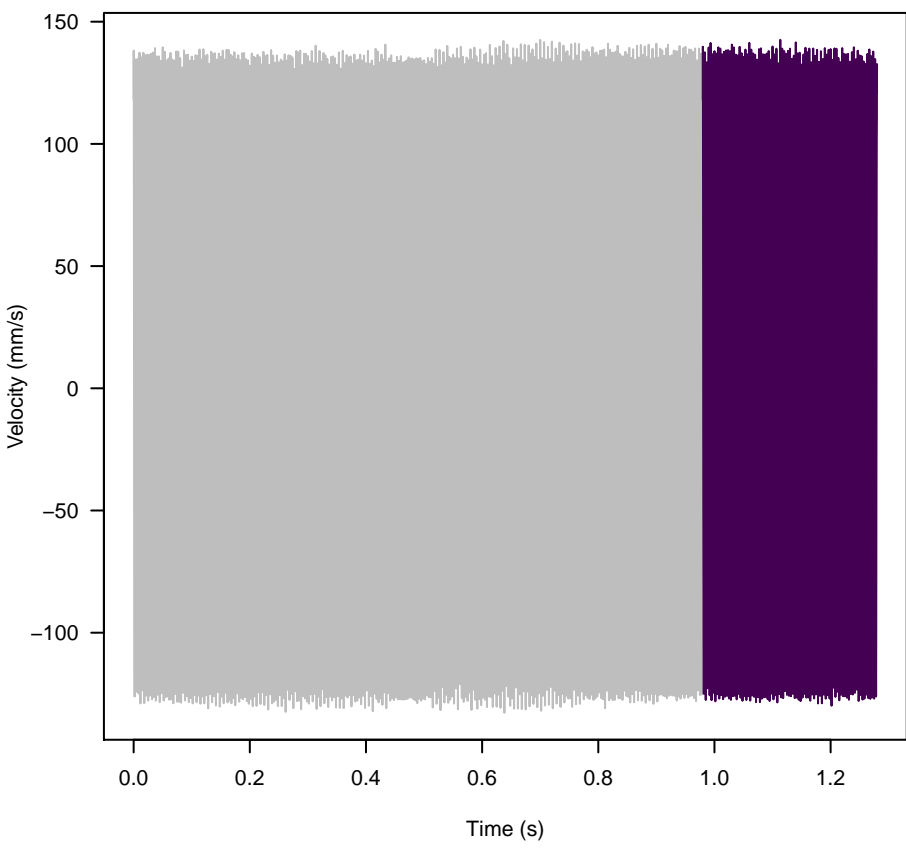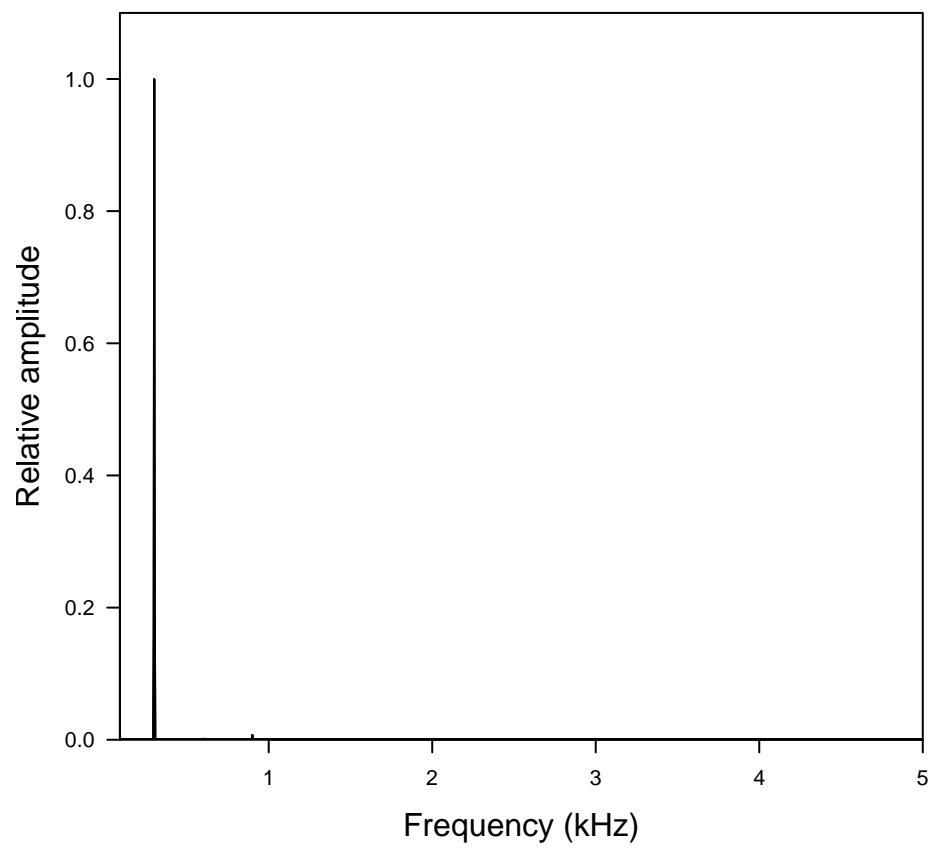

Vel. = 0.014 ; Str. = Receptacle ; Axis = y ; Fl. accession = 10-s-81-11

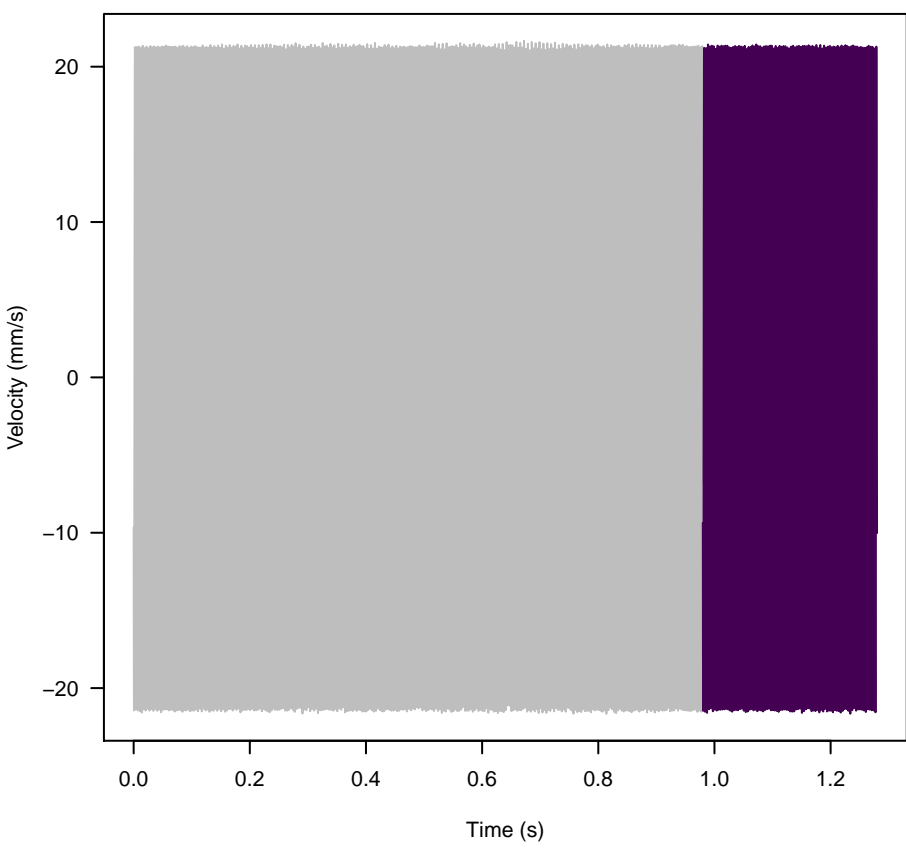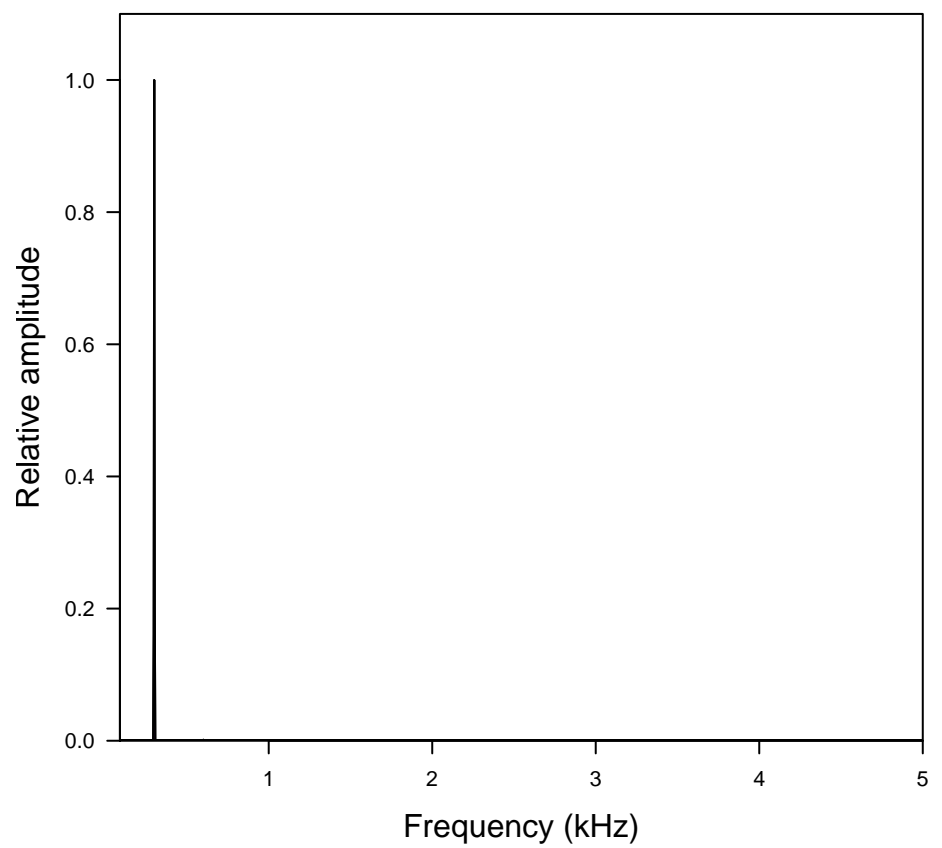

Vel. = 0.014 ; Str. = Corolla ; Axis = z ; Fl. accession = 10-s-81-11

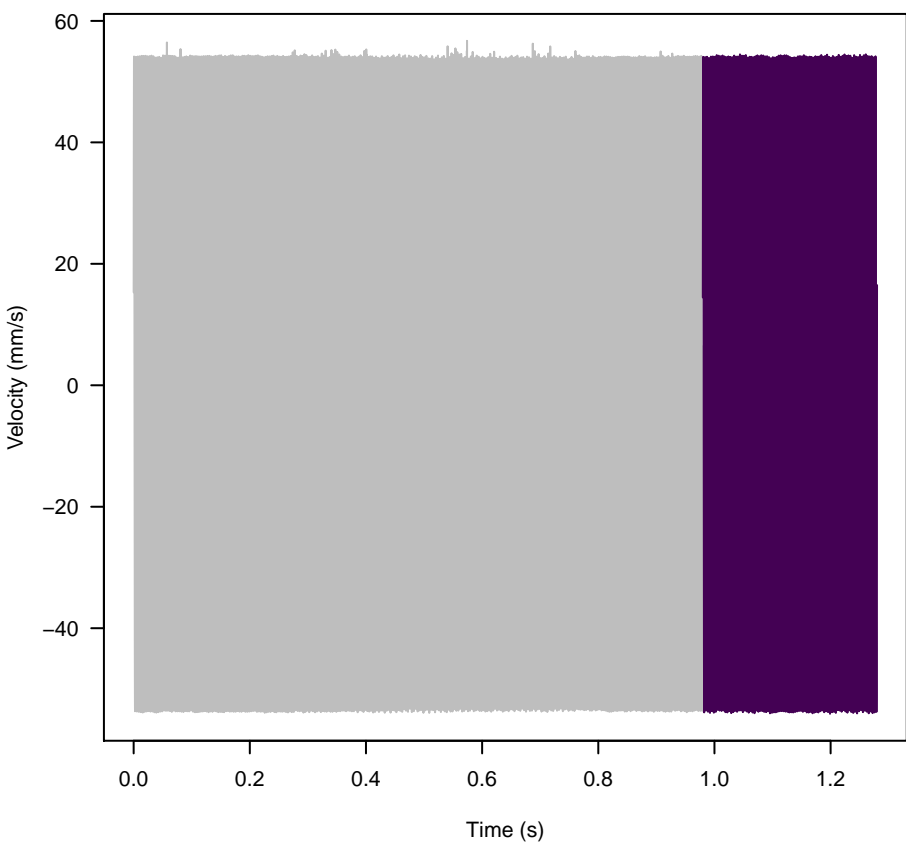



Vel. = 0.014 ; Str. = Receptacle ; Axis = z ; Fl. accession = 10-s-81-11

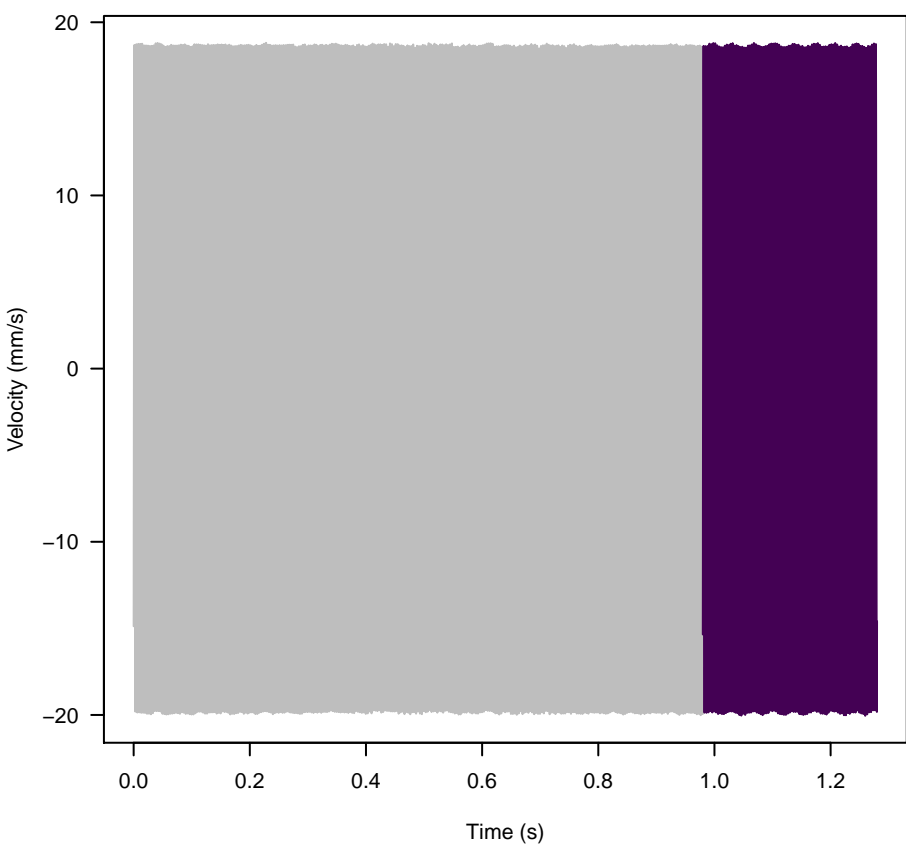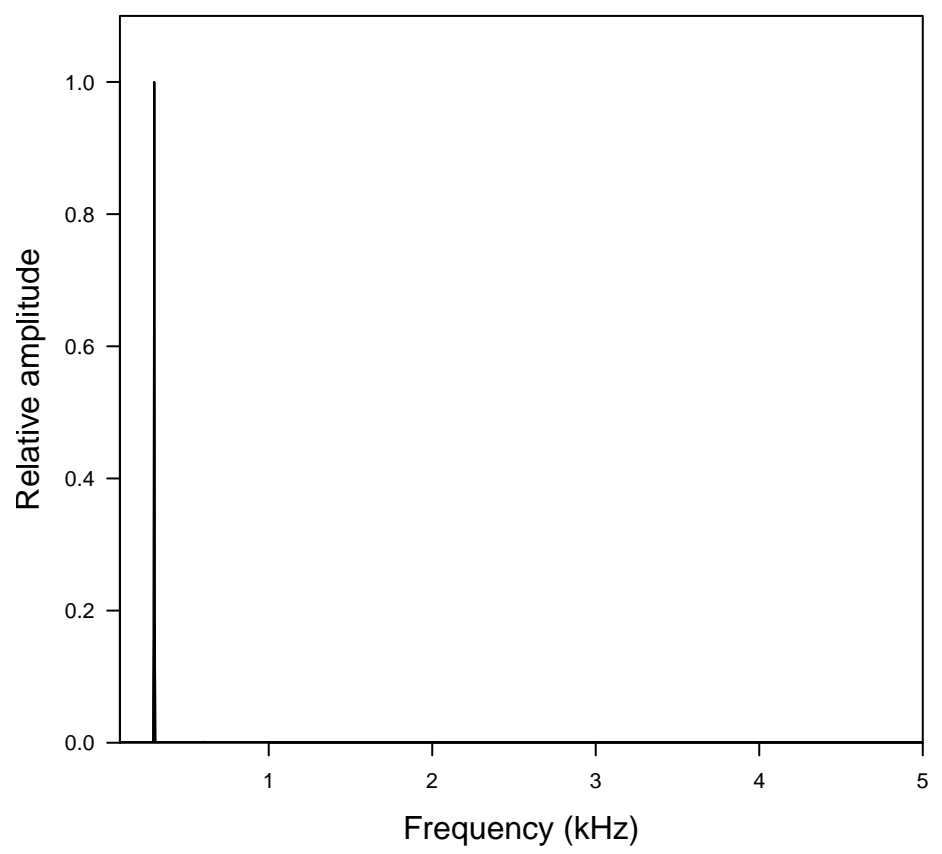

Vel. = 0.014 ; Str. = FA ; Axis = z ; Fl. accession = 10-s-81-11

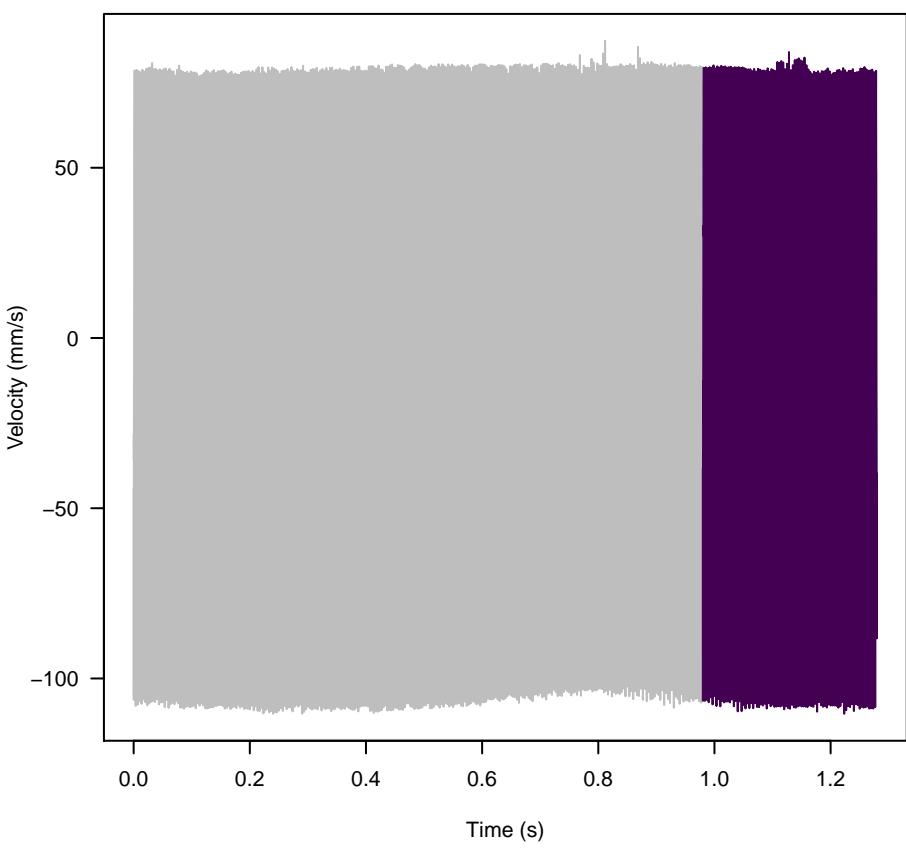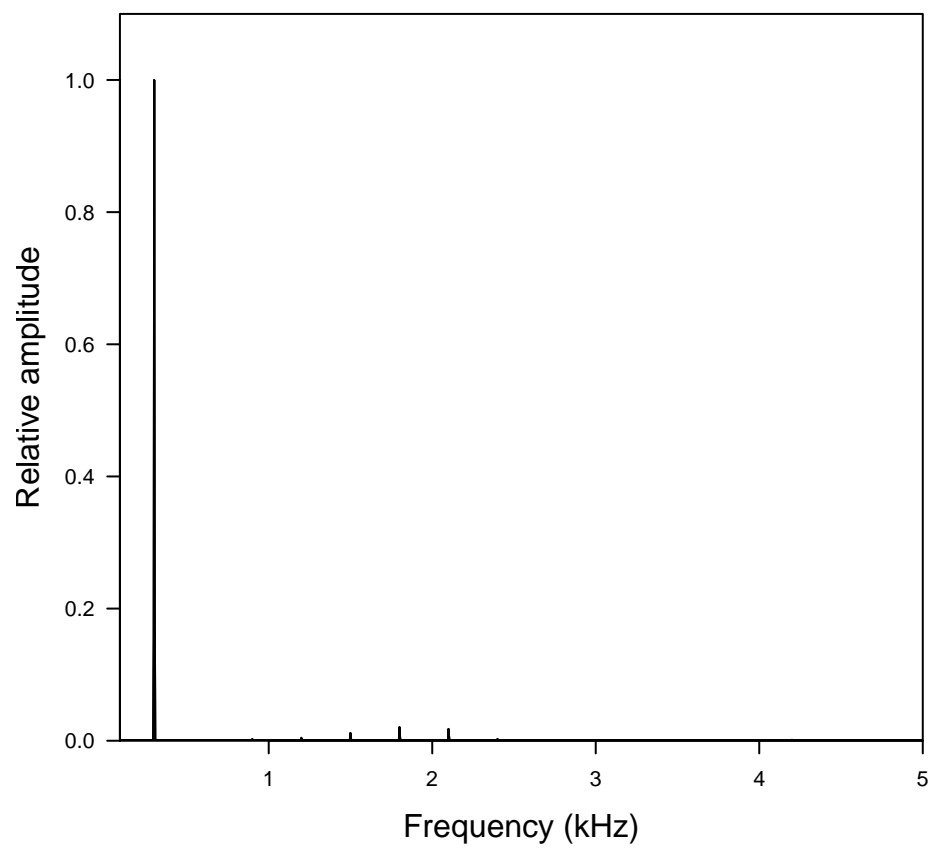

Vel. = 0.014 ; Str. = Receptacle ; Axis = z ; Fl. accession = 10-s-81-11

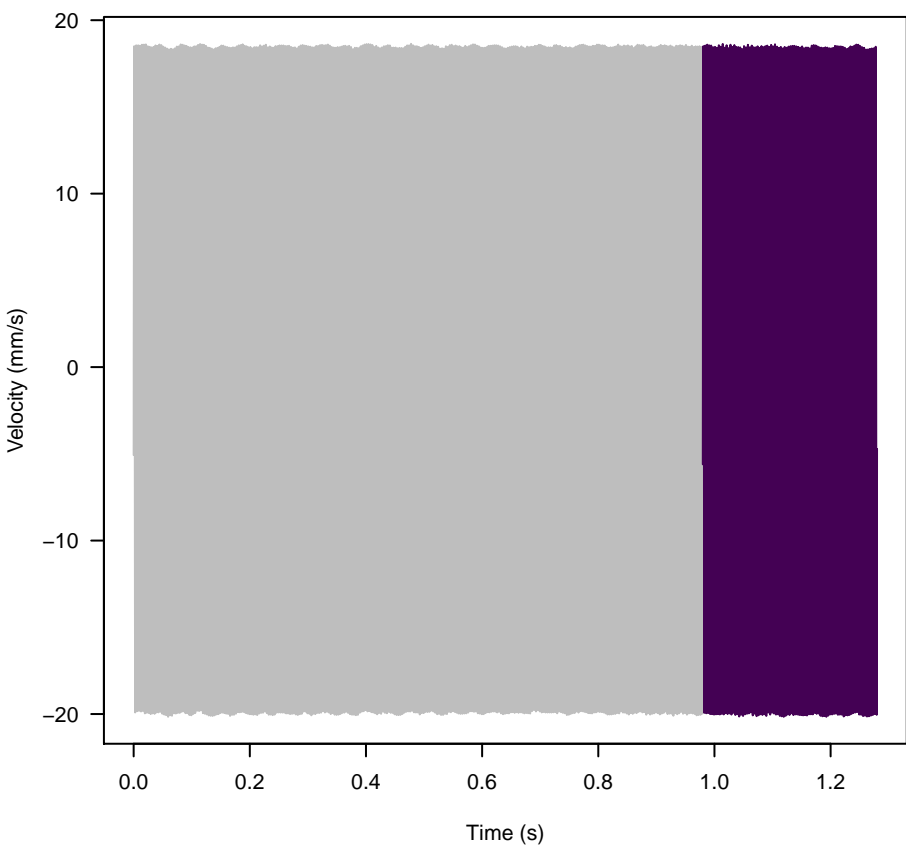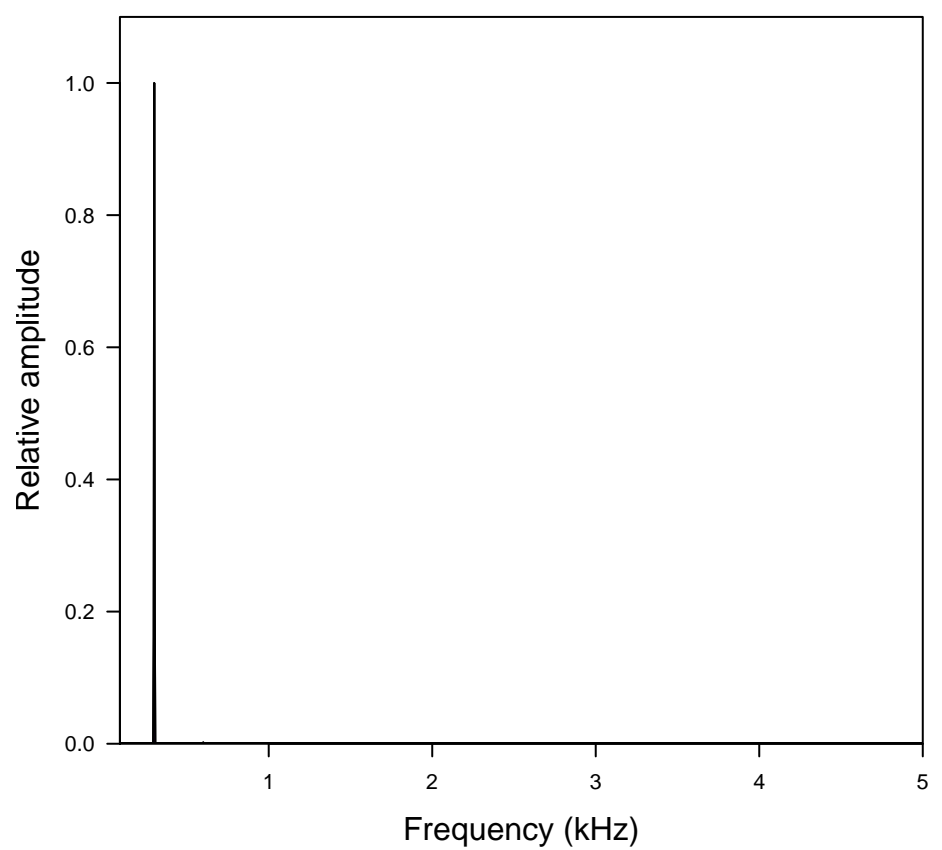

Vel. = 0.014 ; Str. = PA ; Axis = z ; Fl. accession = 10-s-81-11

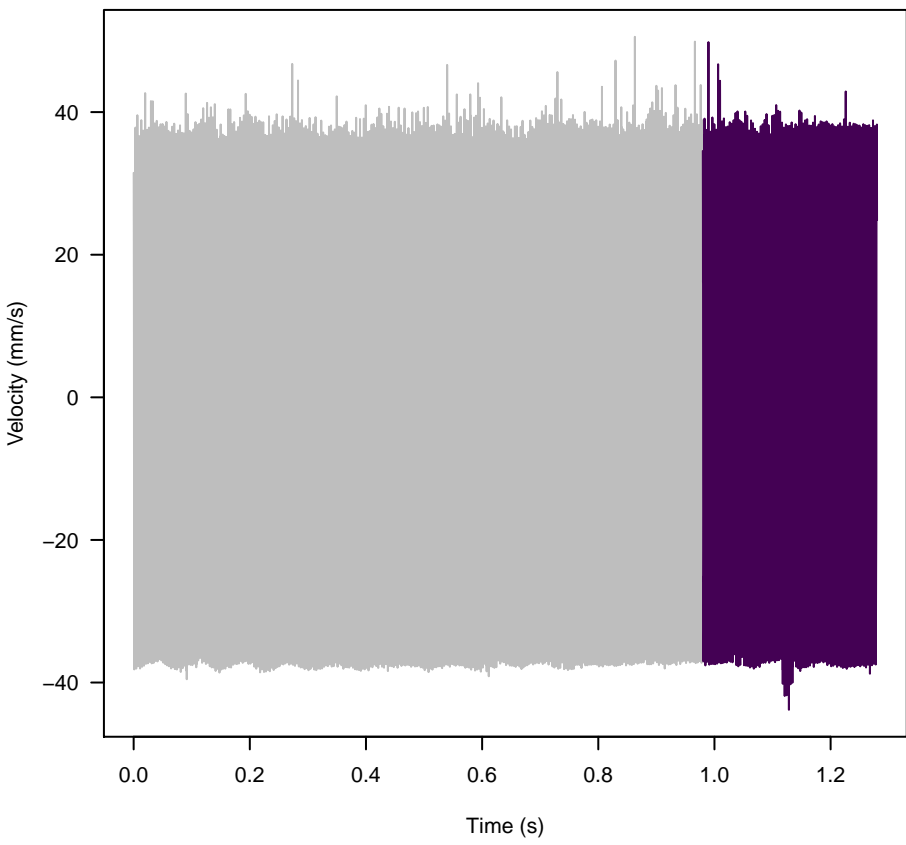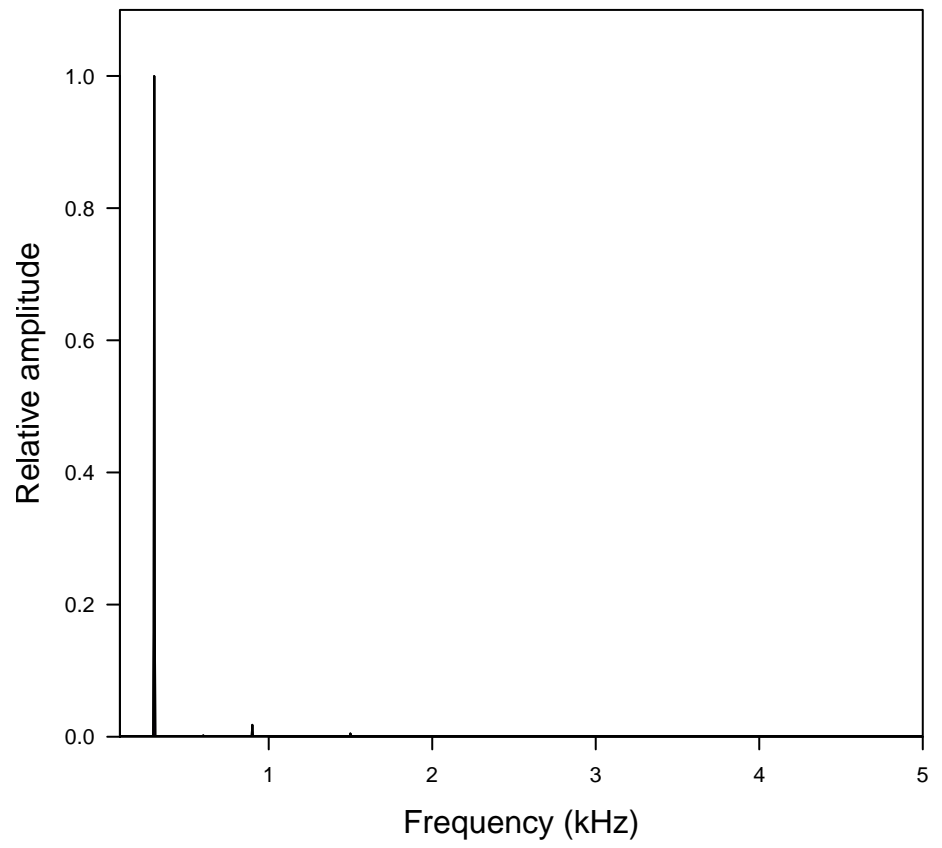

Vel. = 0.014 ; Str. = Receptacle ; Axis = z ; Fl. accession = 10-s-81-11

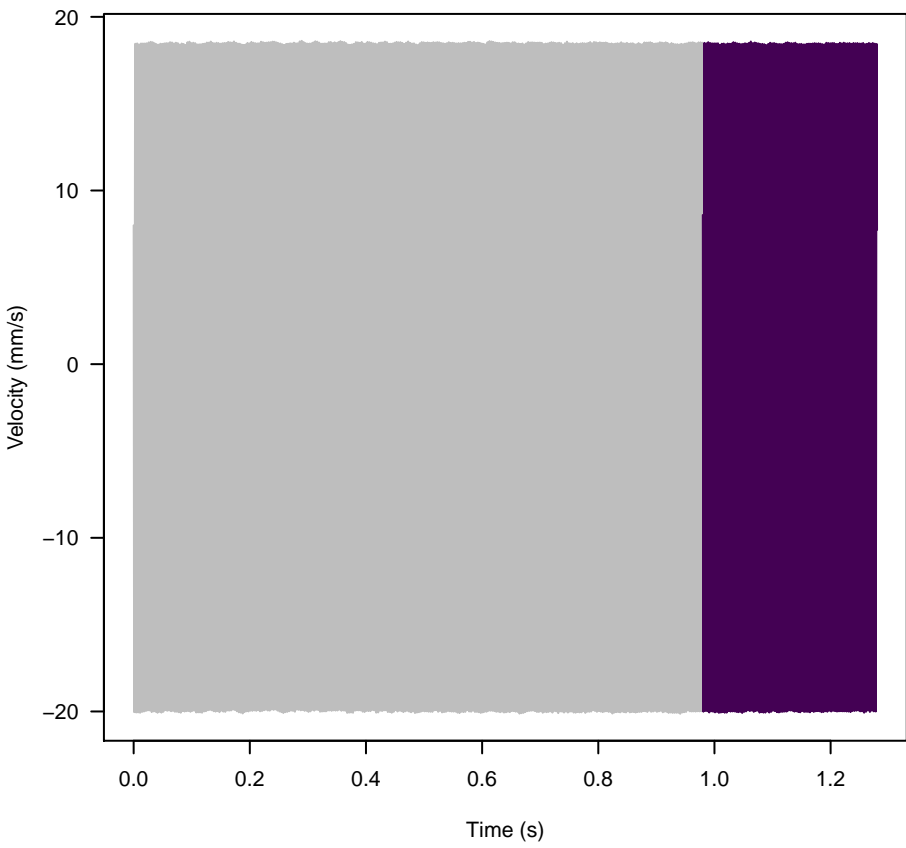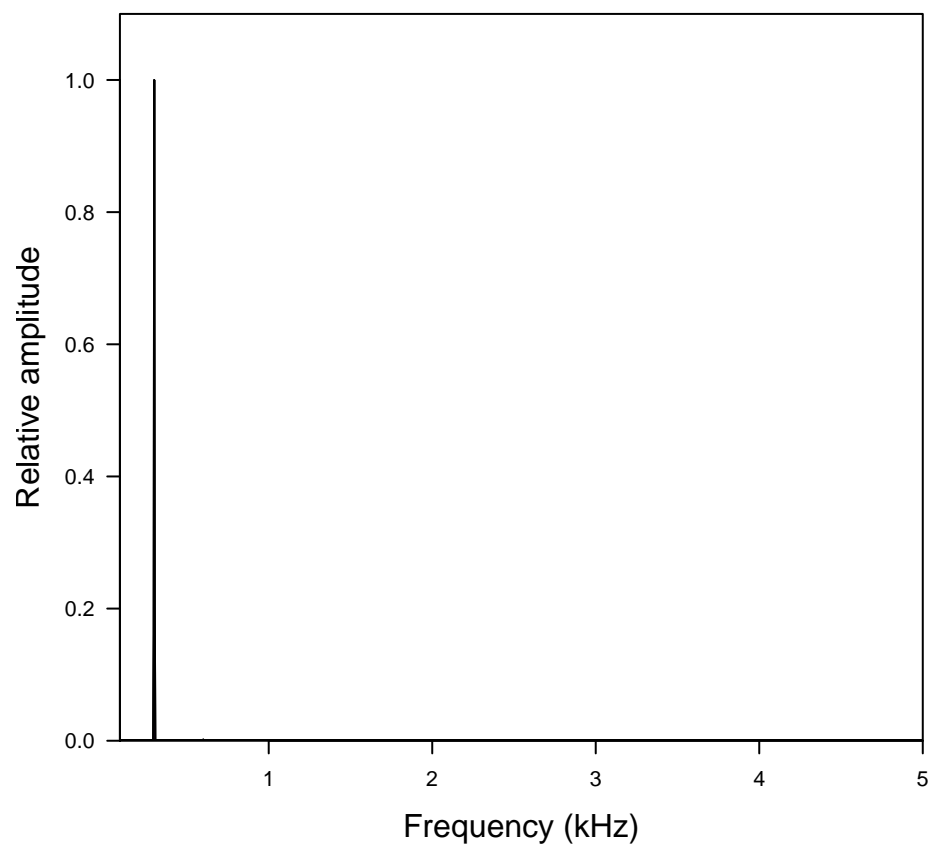

Vel. = 0.028 ; Str. = PA ; Axis = z ; Fl. accession = 10-s-81-11

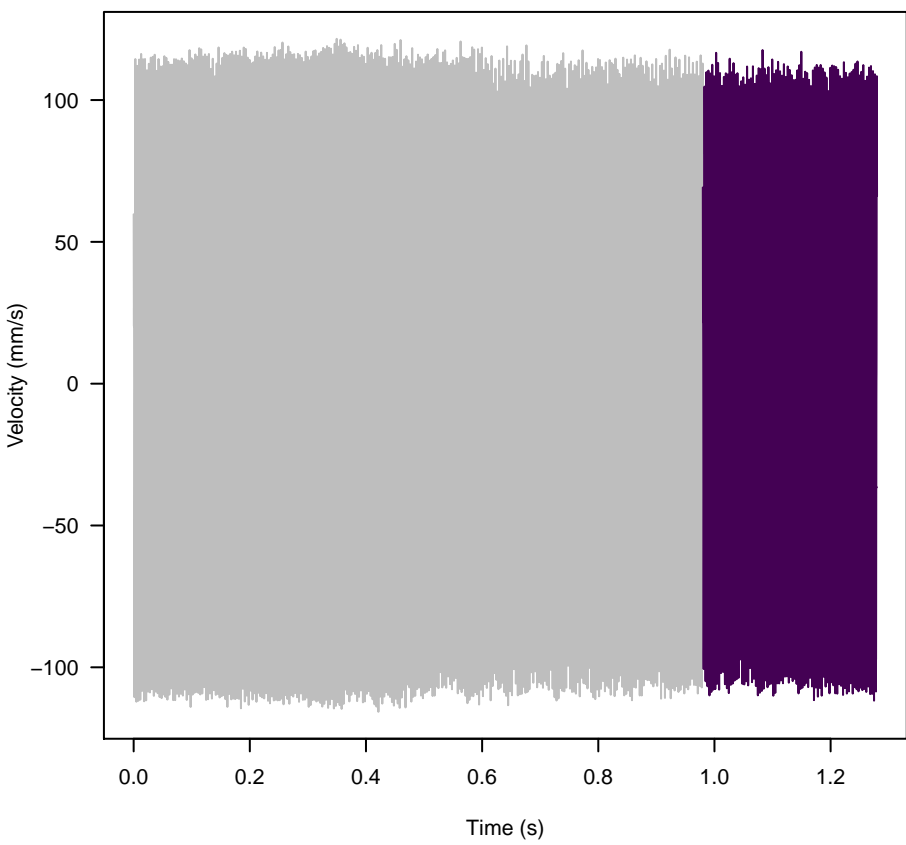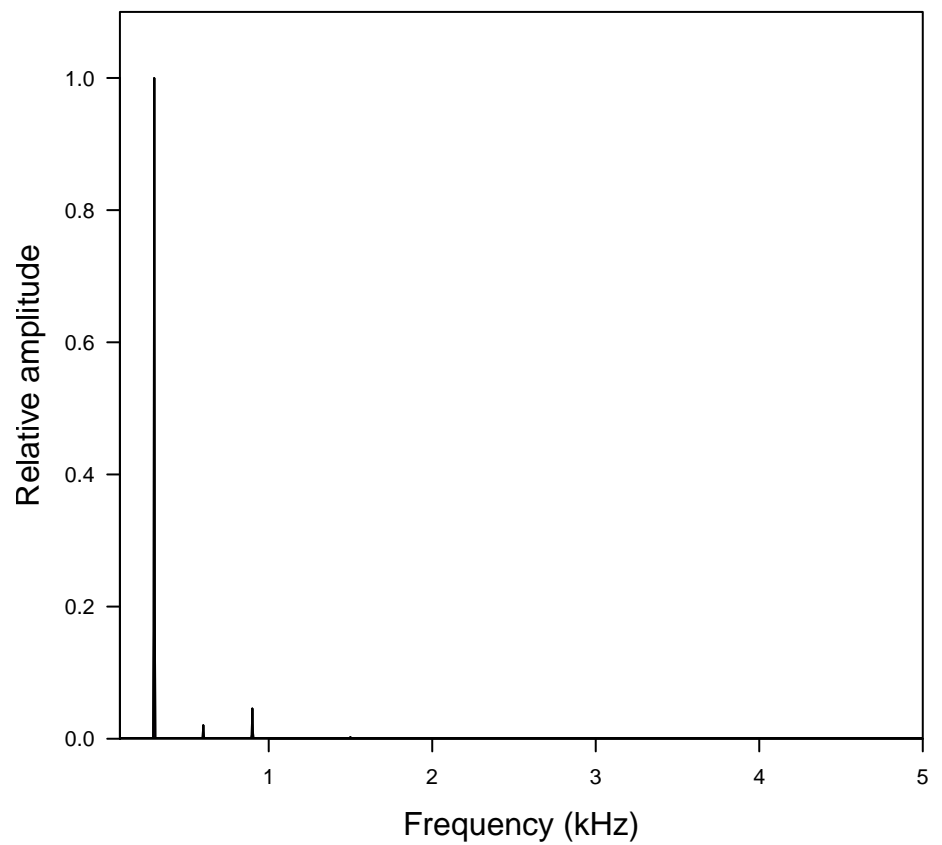

Vel. = 0.028 ; Str. = Receptacle ; Axis = z ; Fl. accession = 10-s-81-11

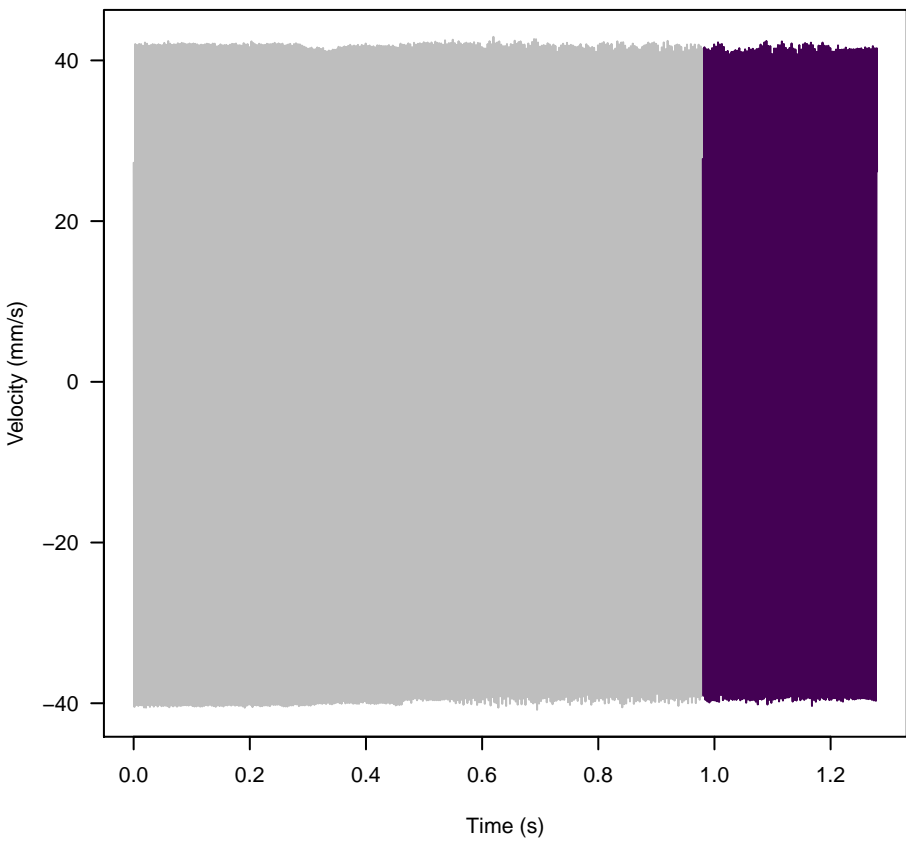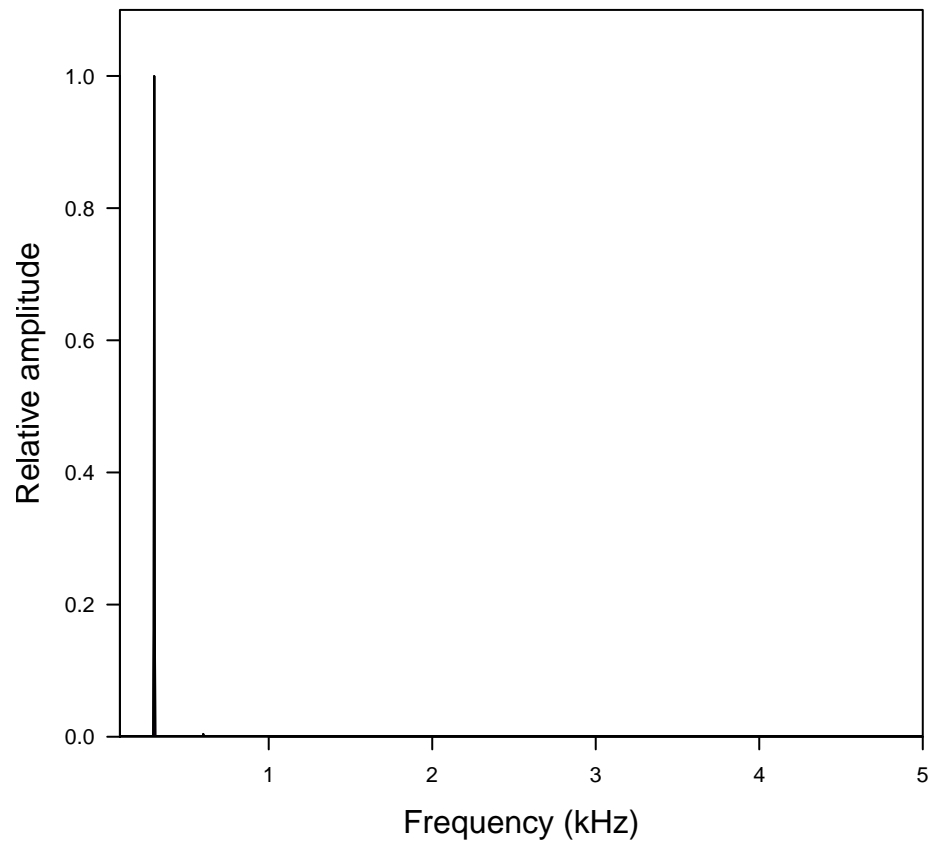

Vel. = 0.028 ; Str. = FA ; Axis = z ; Fl. accession = 10-s-81-11

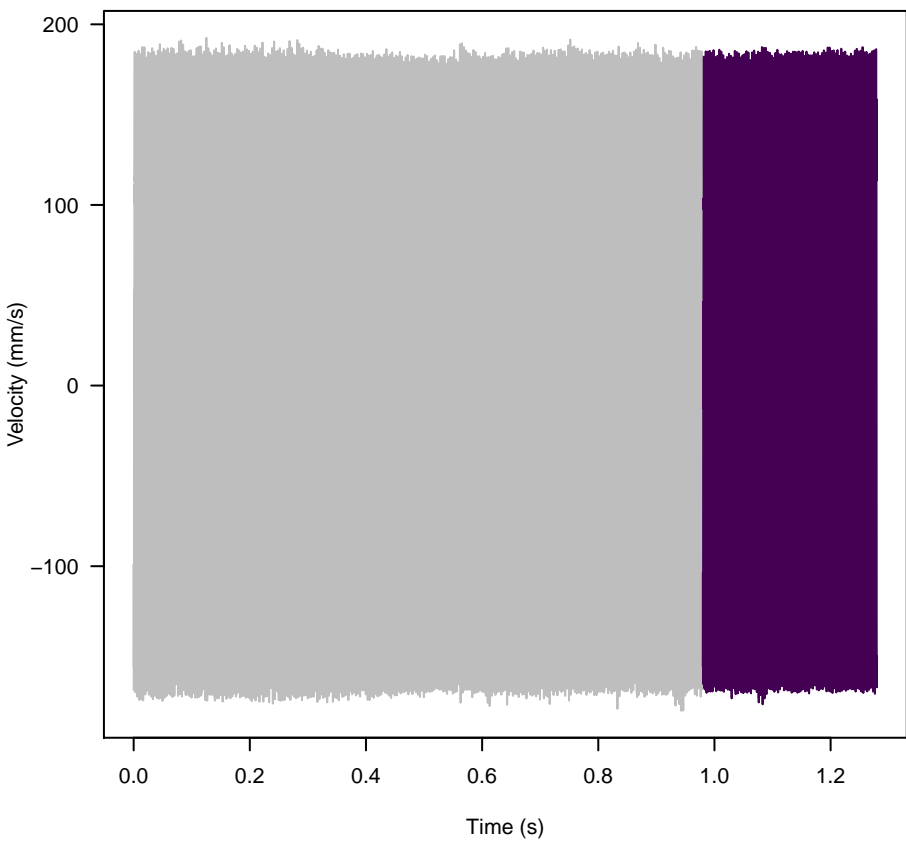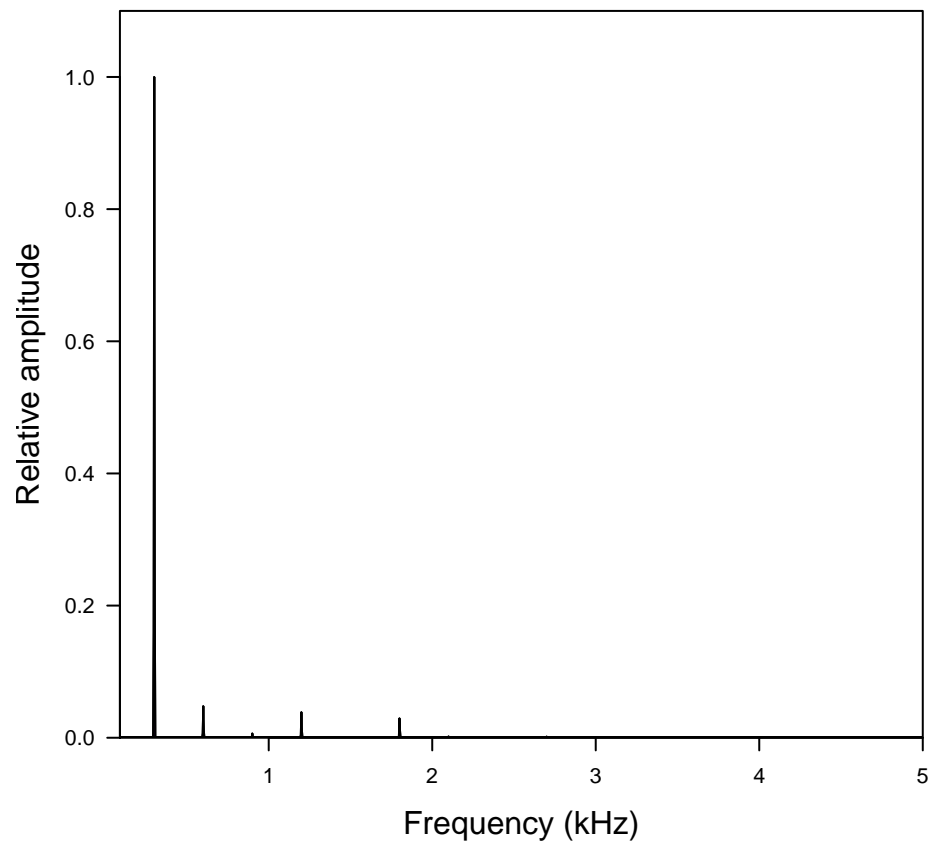

Vel. = 0.028 ; Str. = Receptacle ; Axis = z ; Fl. accession = 10-s-81-11

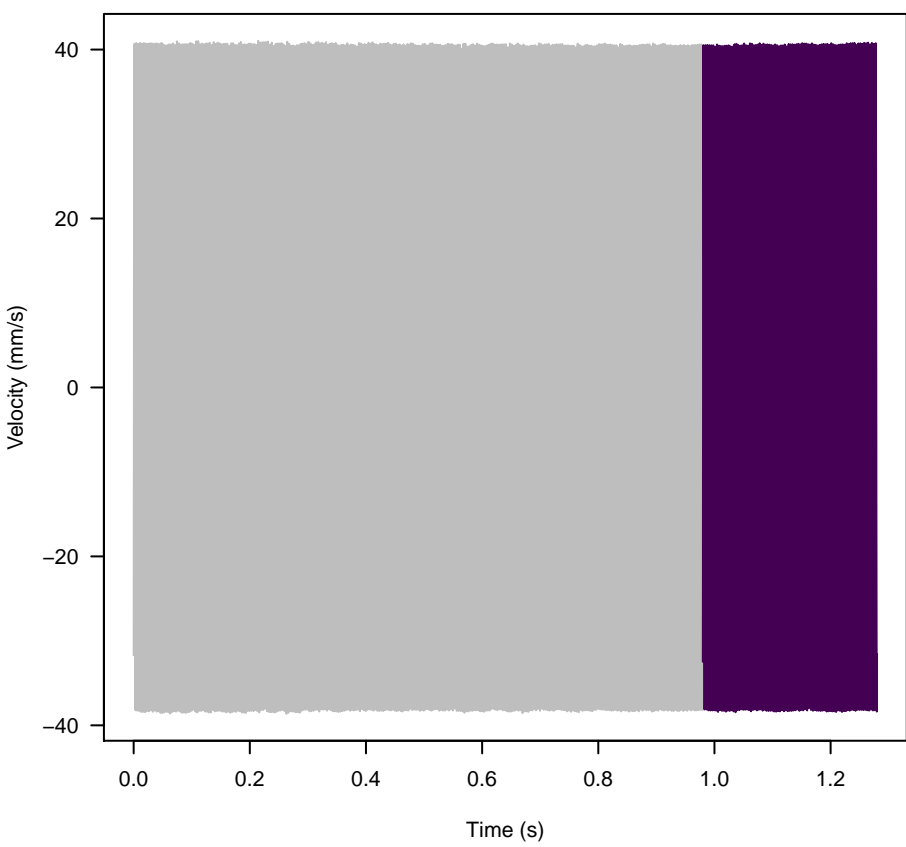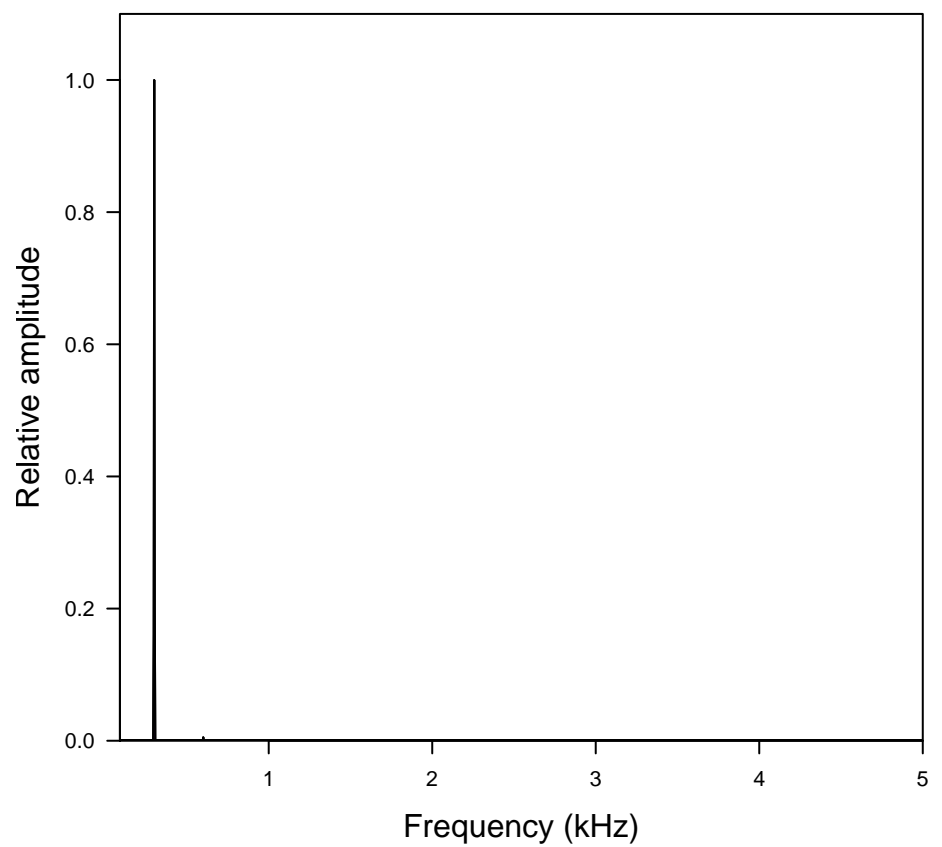

Vel. = 0.028 ; Str. = Corolla ; Axis = z ; Fl. accession = 10-s-81-11

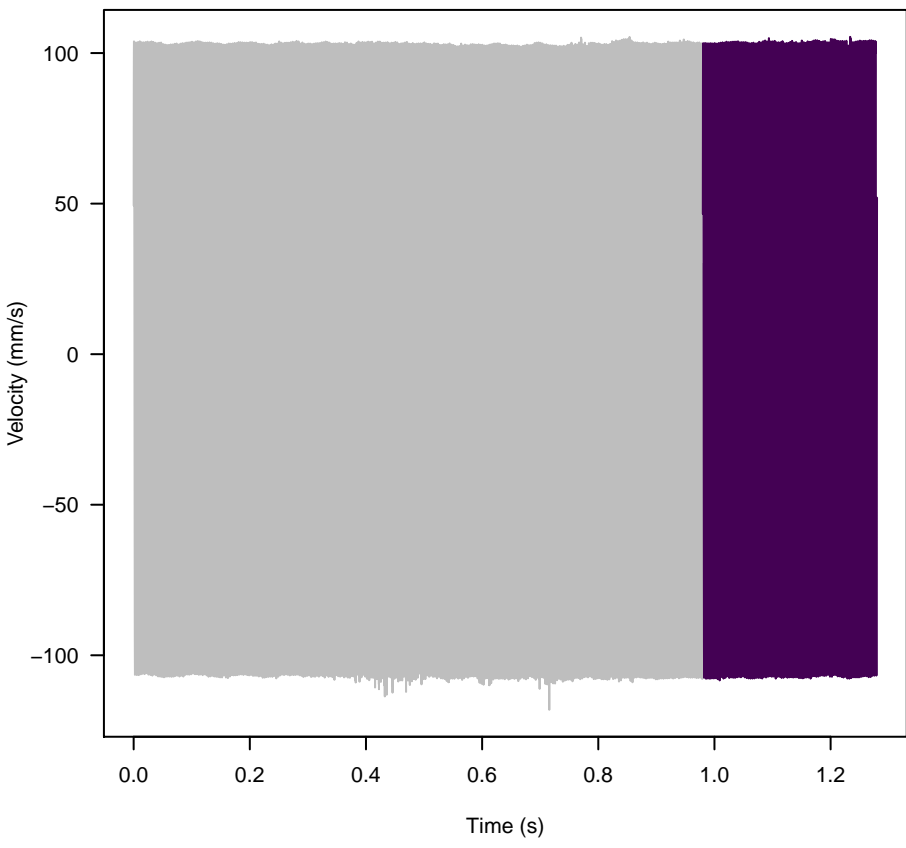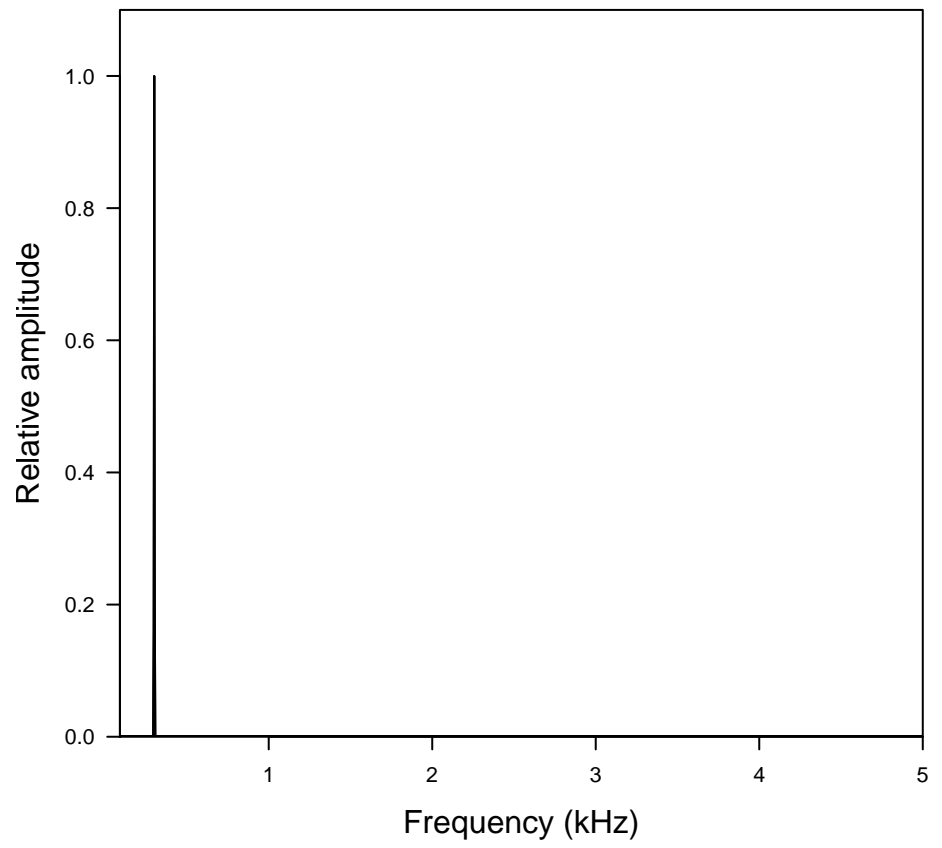

Vel. = 0.028 ; Str. = Receptacle ; Axis = z ; Fl. accession = 10-s-81-11

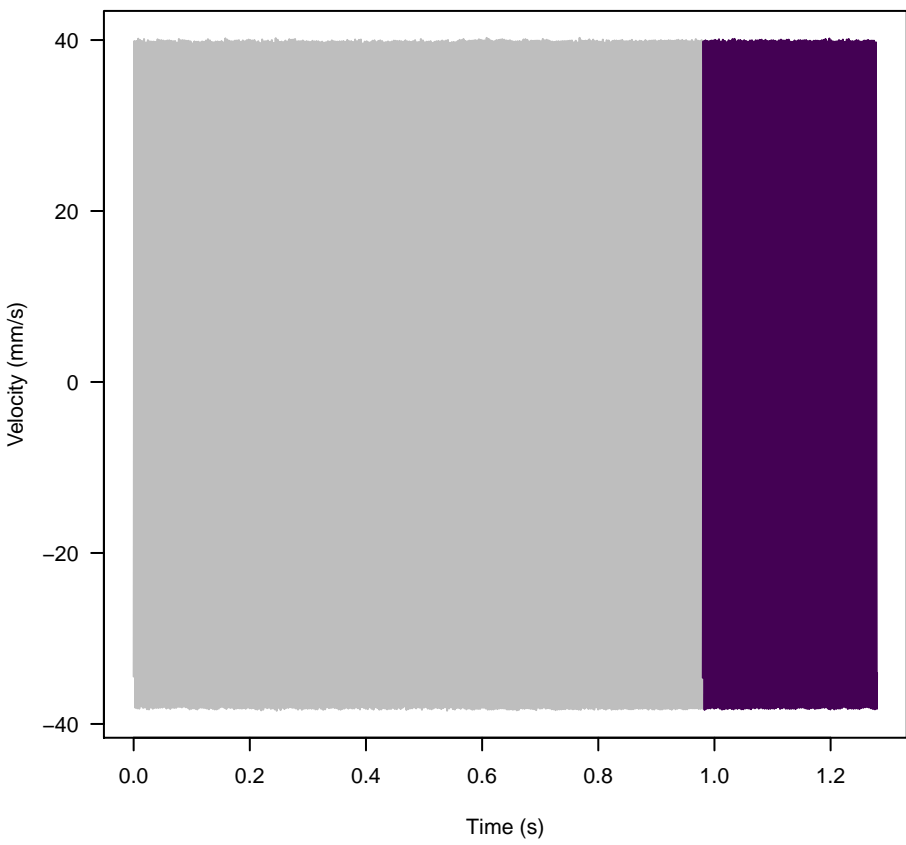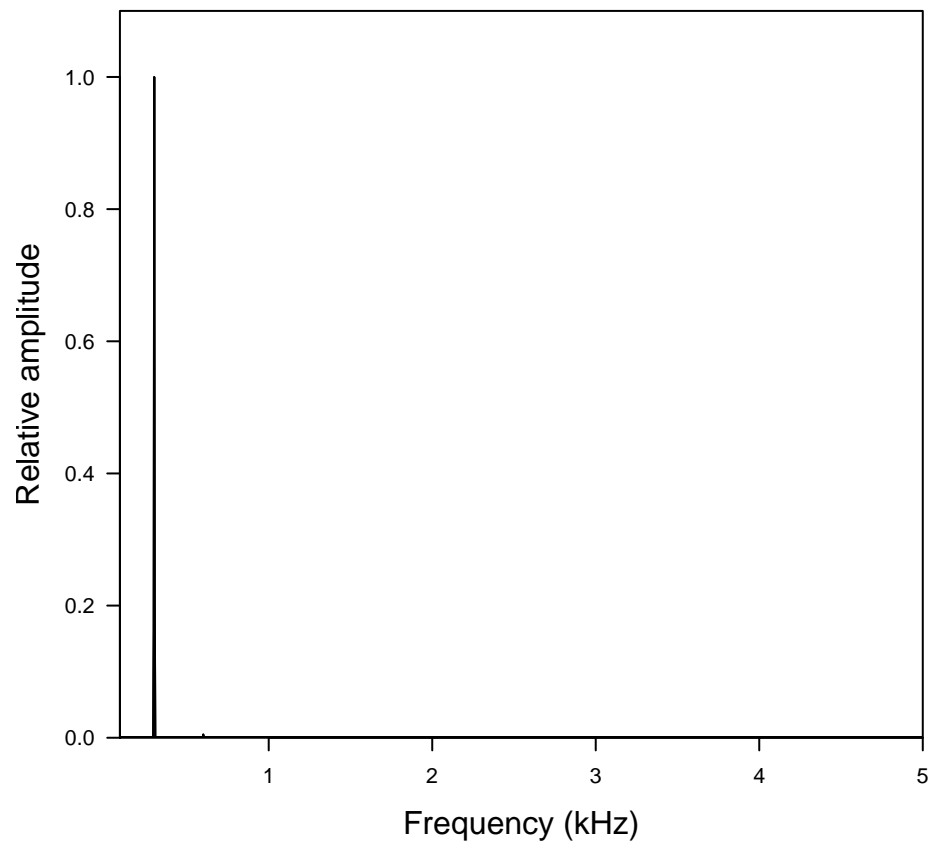

Vel. = 0.057 ; Str. = Corolla ; Axis = z ; Fl. accession = 10-s-81-11

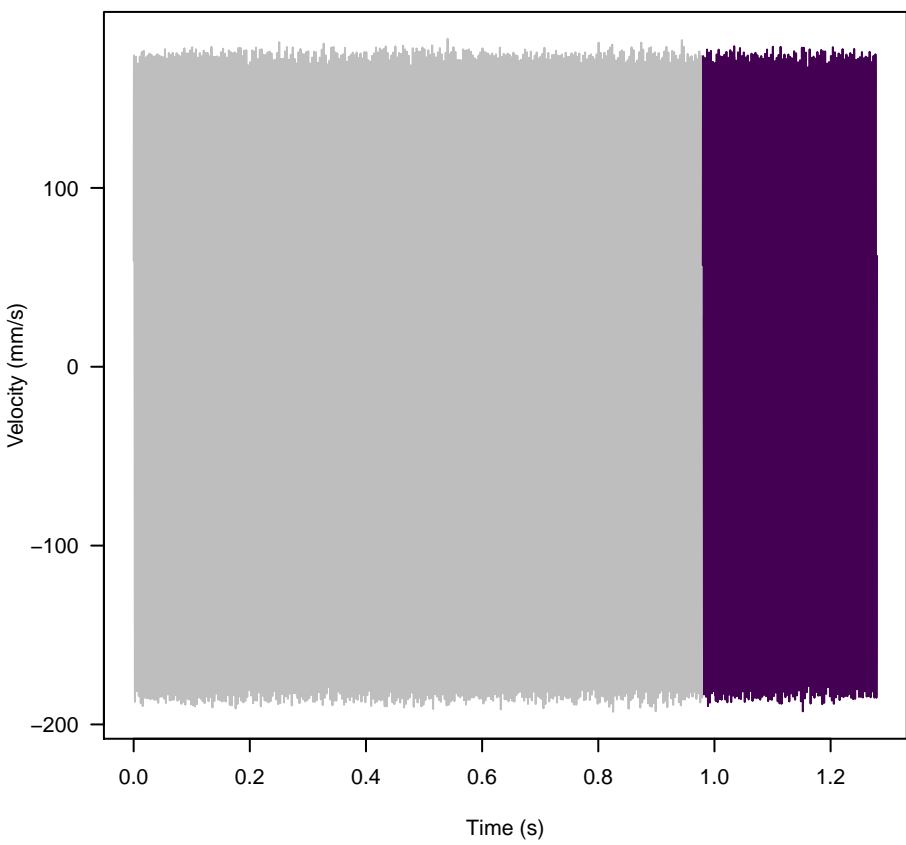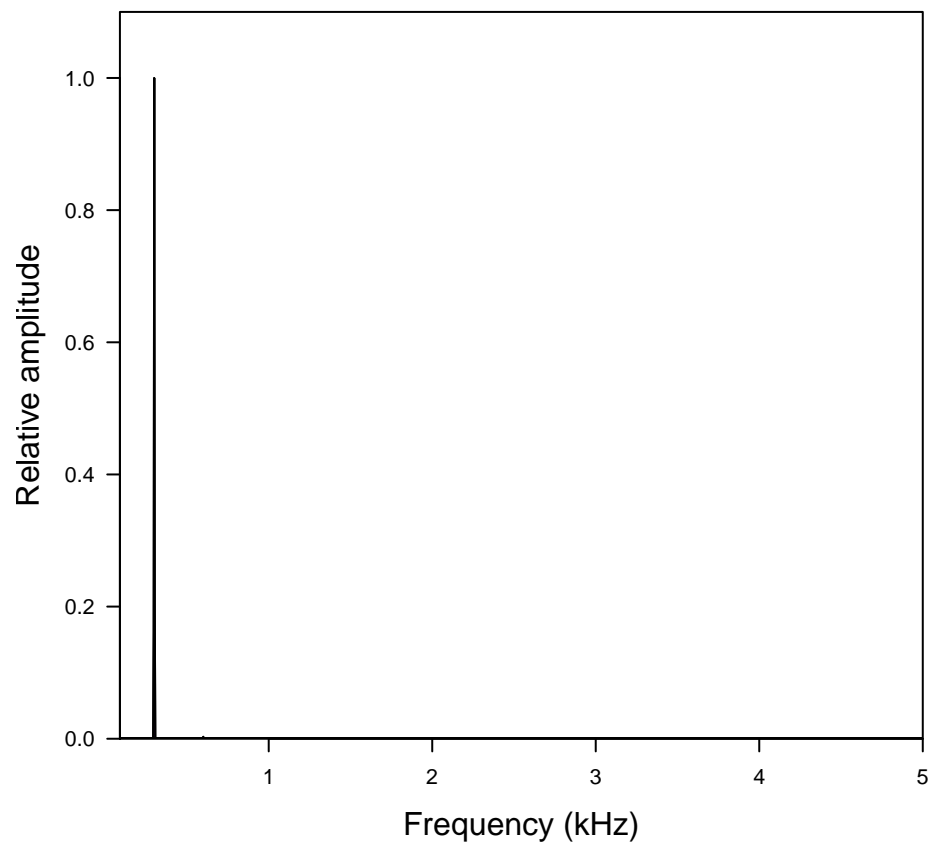

Vel. = 0.057 ; Str. = Receptacle ; Axis = z ; Fl. accession = 10-s-81-11

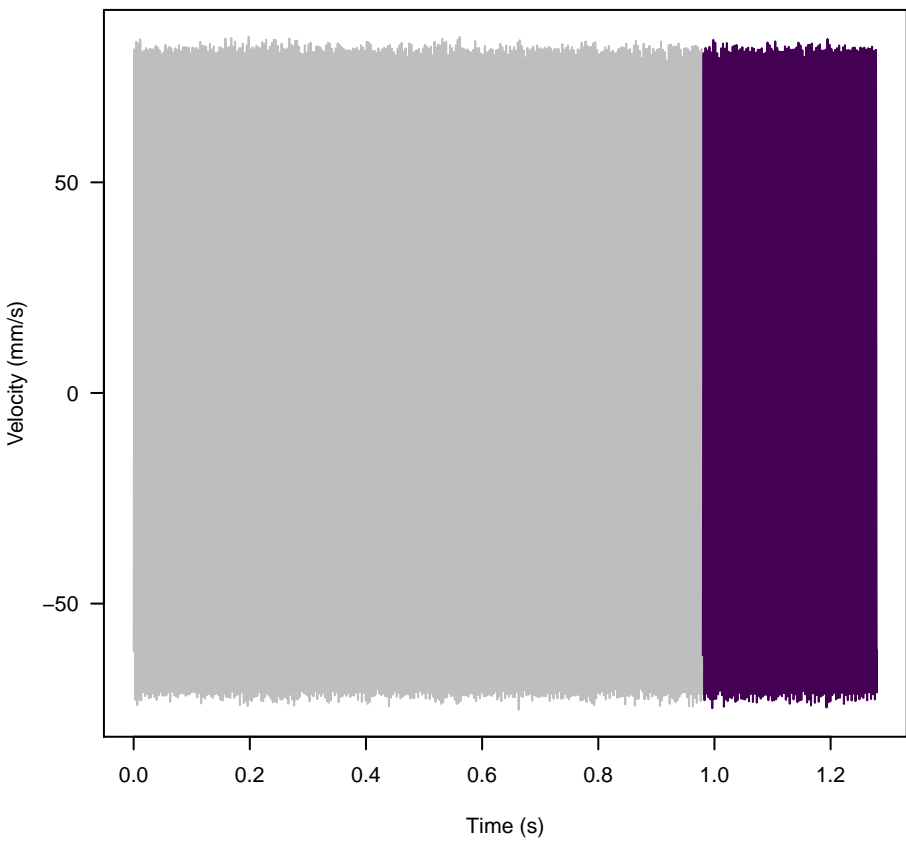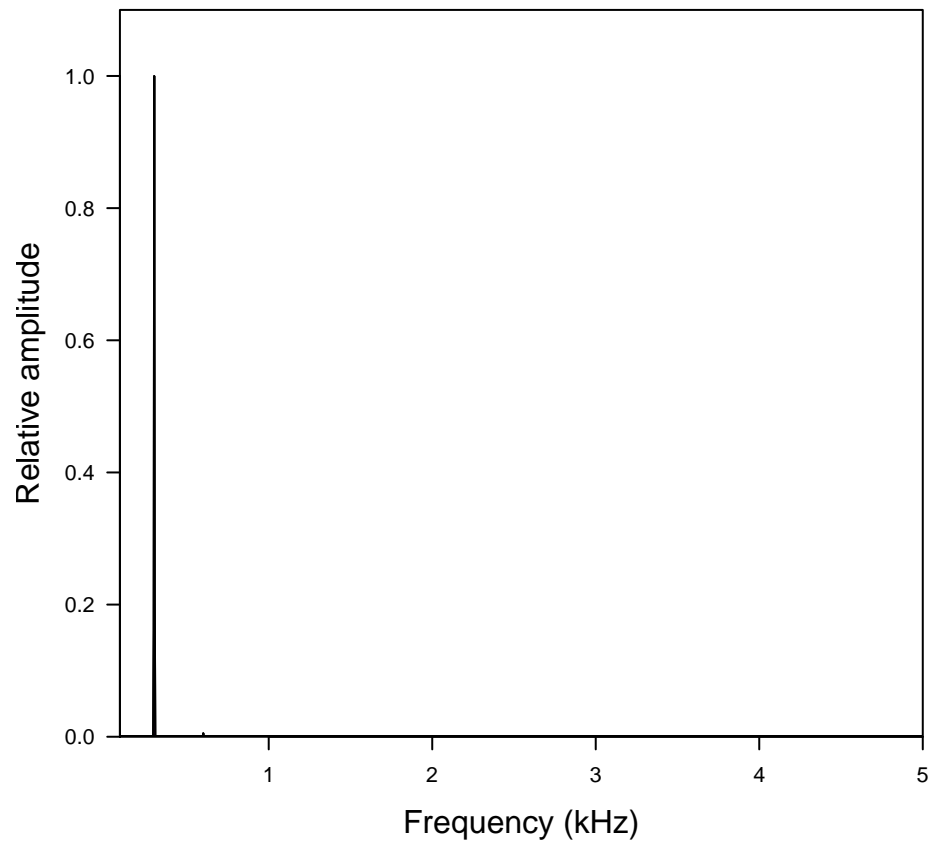

Vel. = 0.057 ; Str. = FA ; Axis = z ; Fl. accession = 10-s-81-11

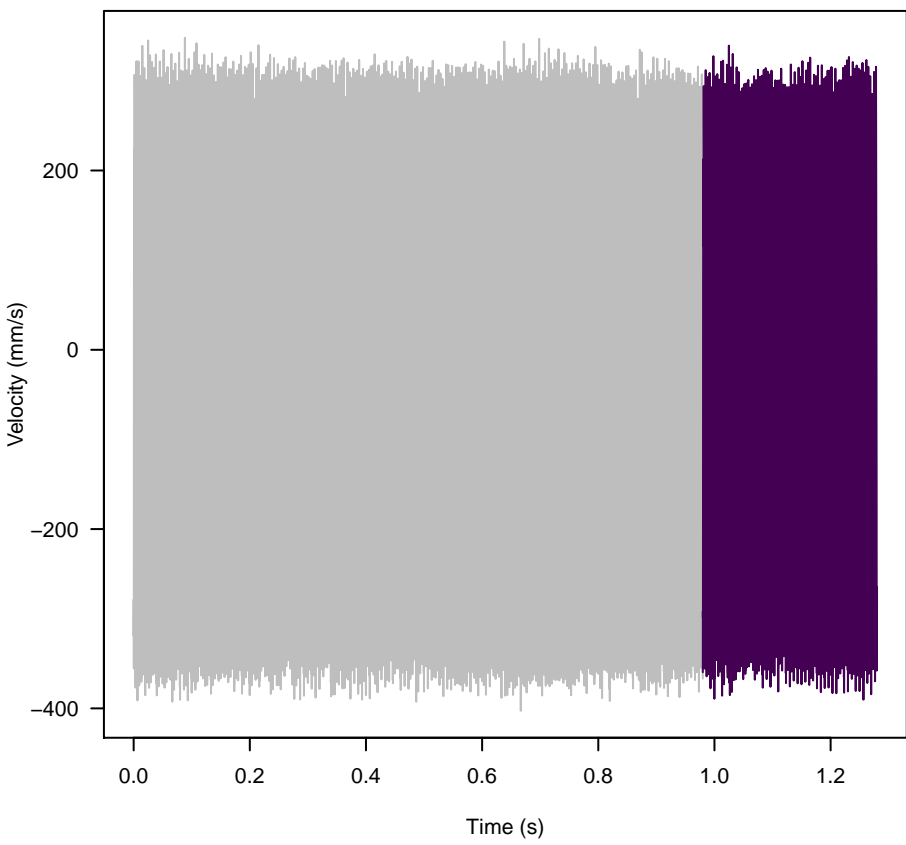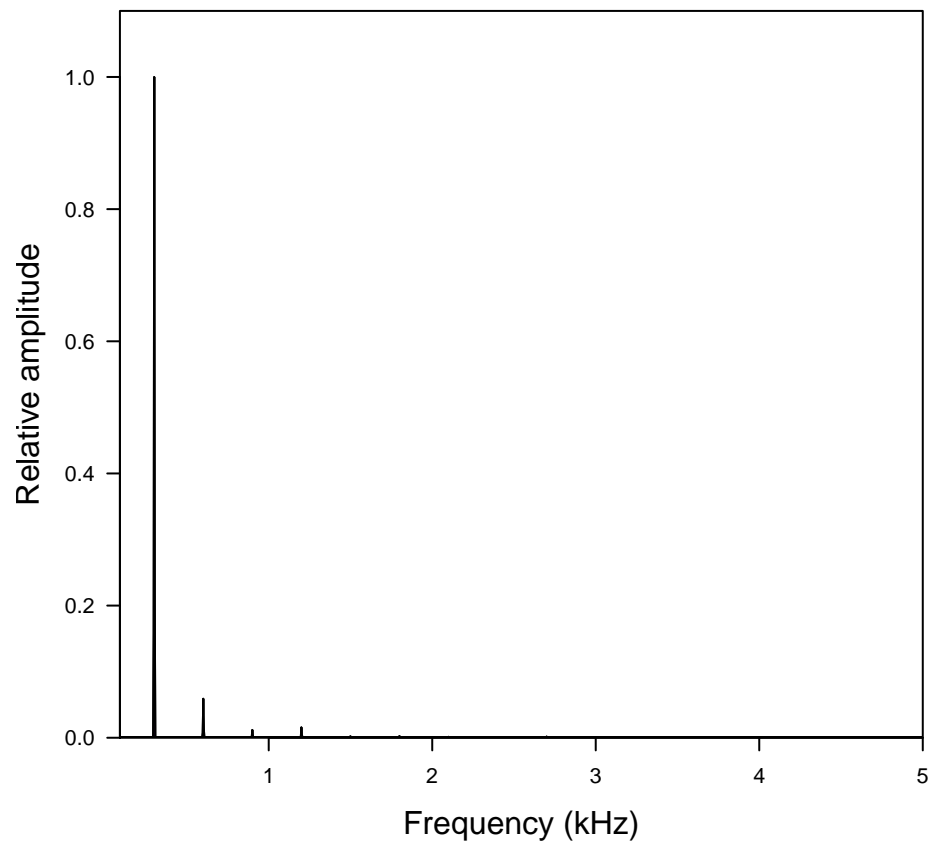

Vel. = 0.057 ; Str. = Receptacle ; Axis = z ; Fl. accession = 10-s-81-11

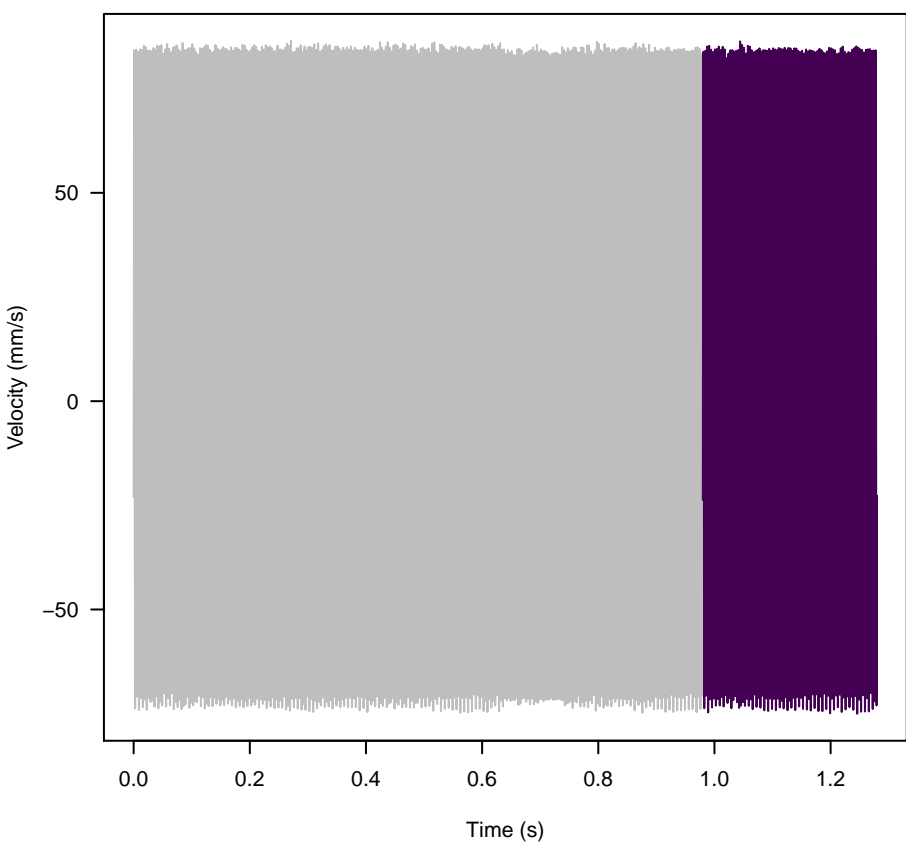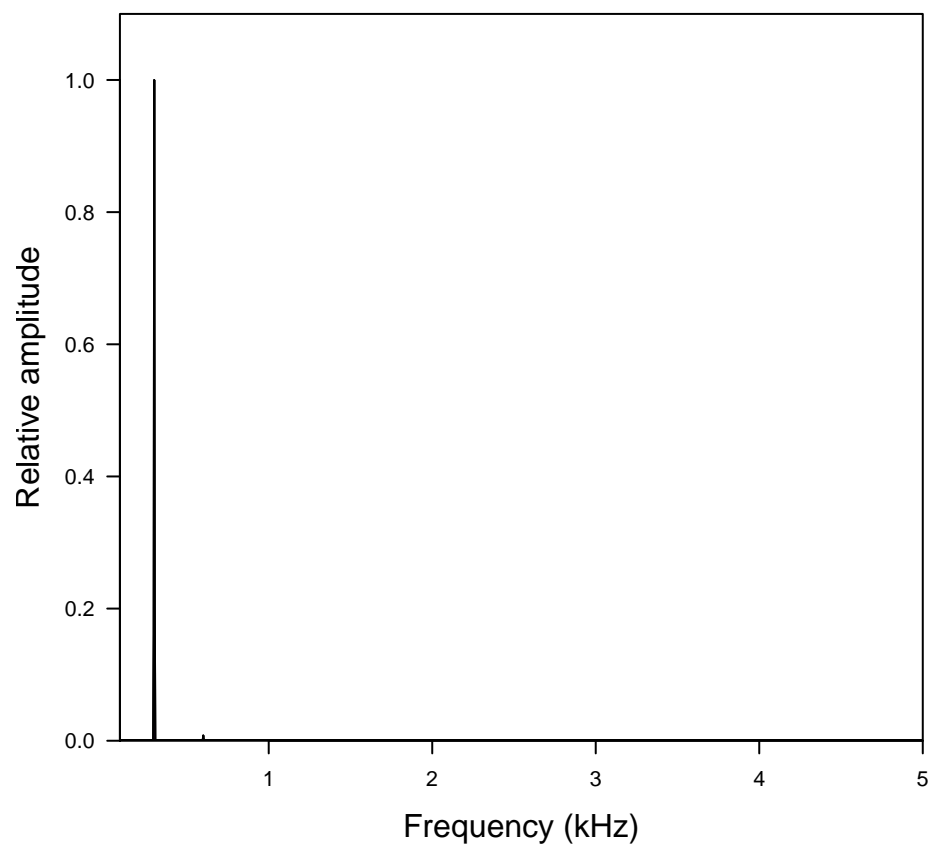

Vel. = 0.057 ; Str. = PA ; Axis = z ; Fl. accession = 10-s-81-11

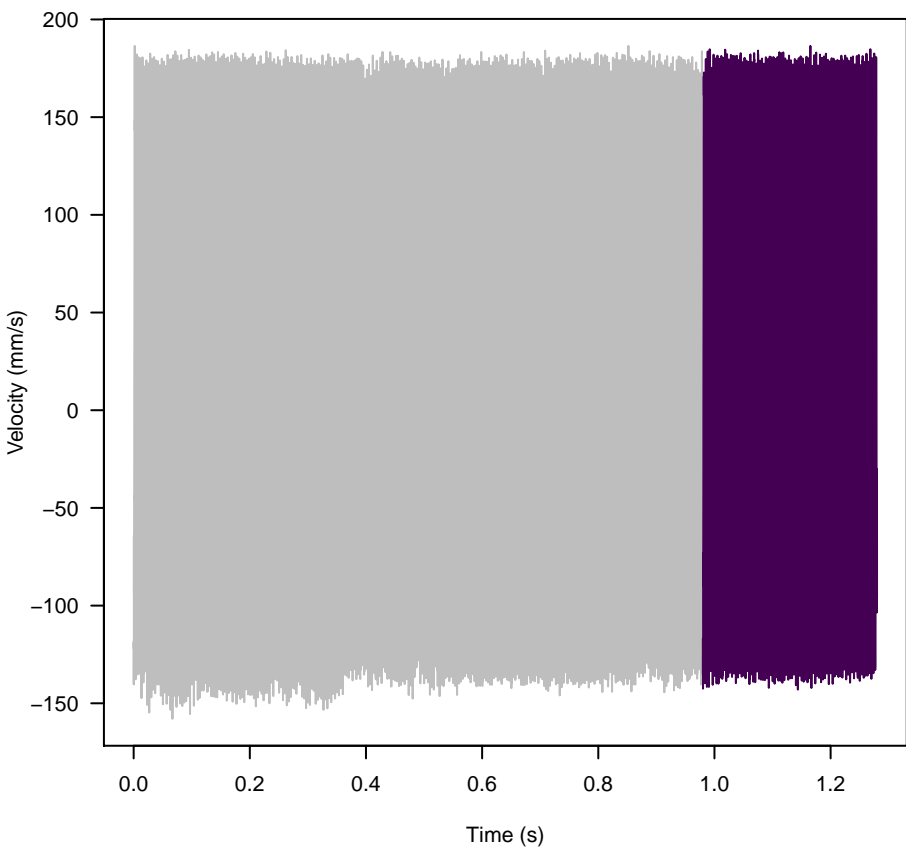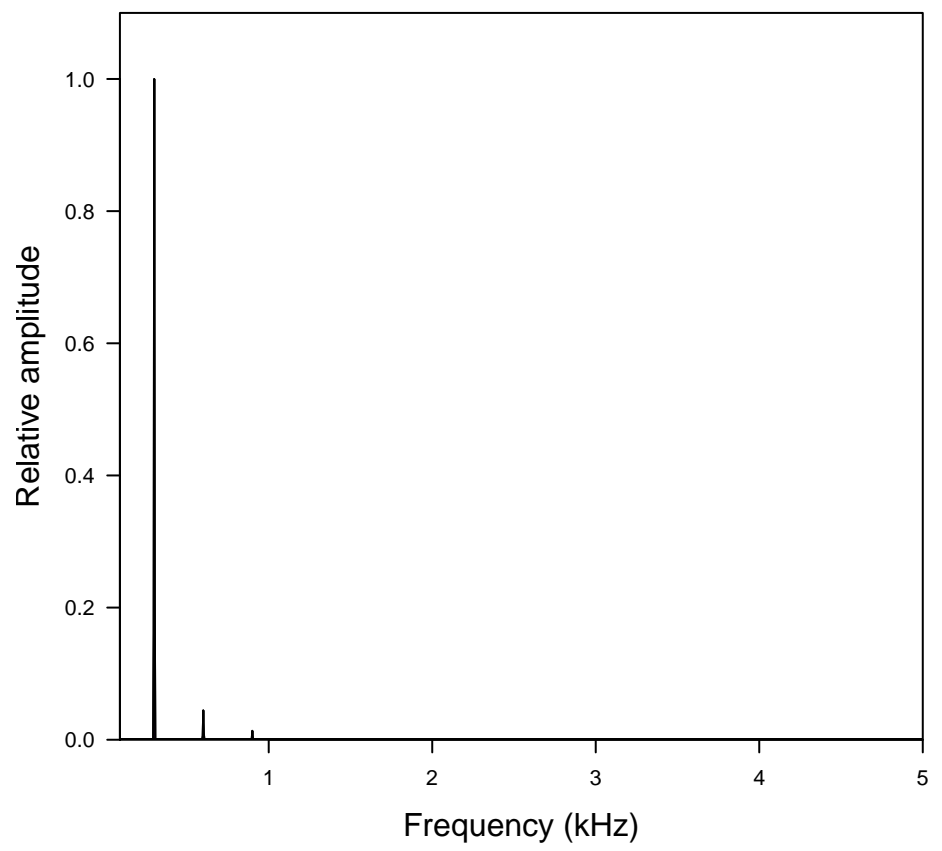

Vel. = 0.057 ; Str. = Receptacle ; Axis = z ; Fl. accession = 10-s-81-11

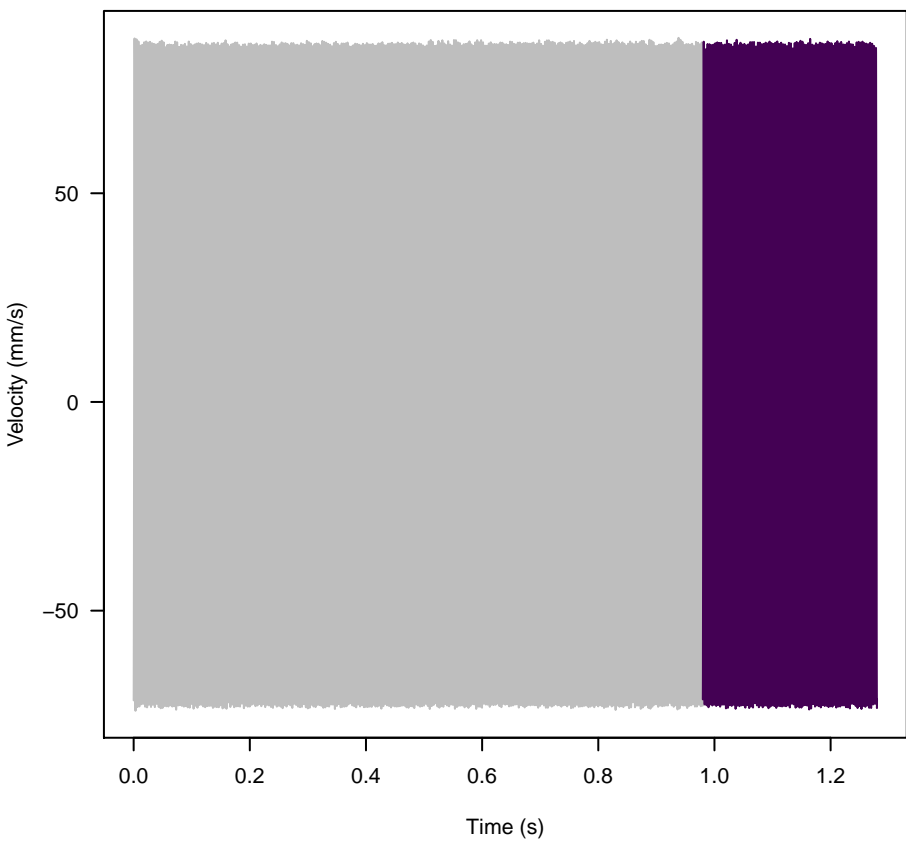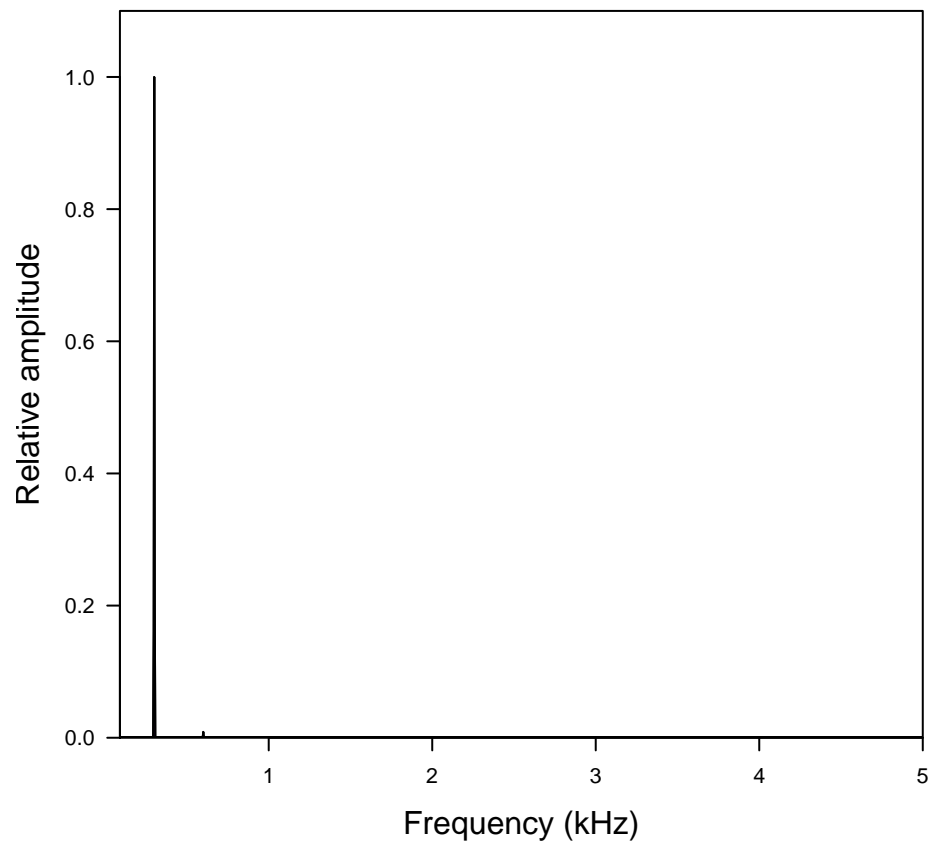

Vel. = 0.014 ; Str. = Corolla ; Axis = x ; Fl. accession = 10-s-81-11

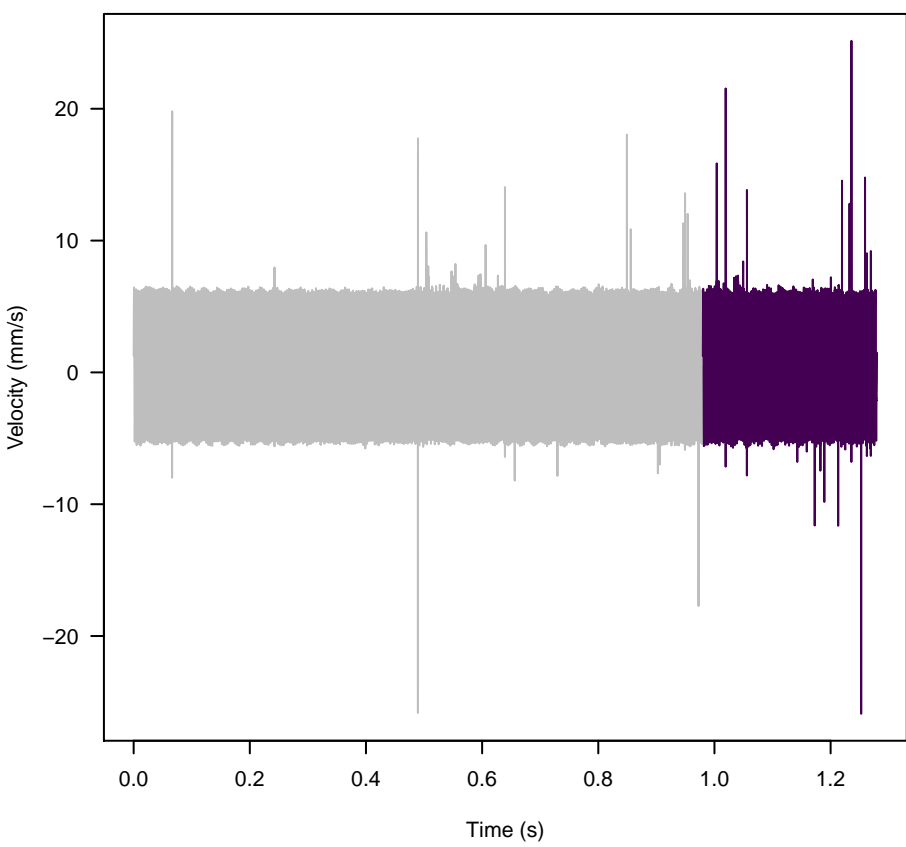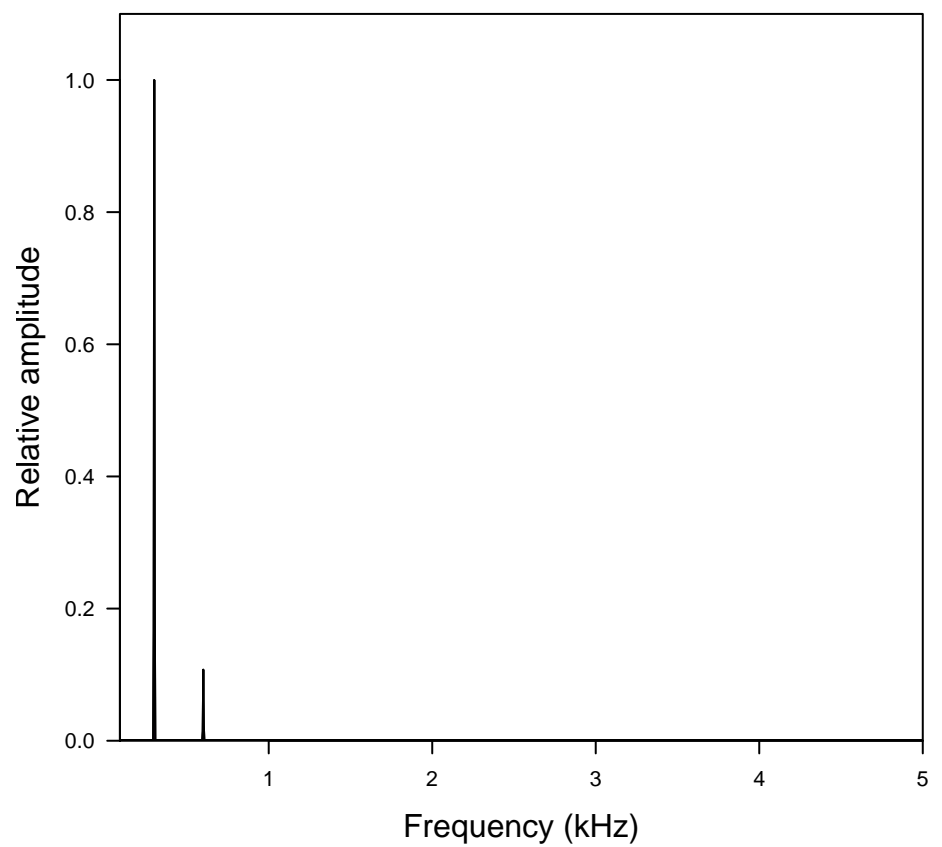

Vel. = 0.014 ; Str. = Receptacle ; Axis = x ; Fl. accession = 10-s-81-11

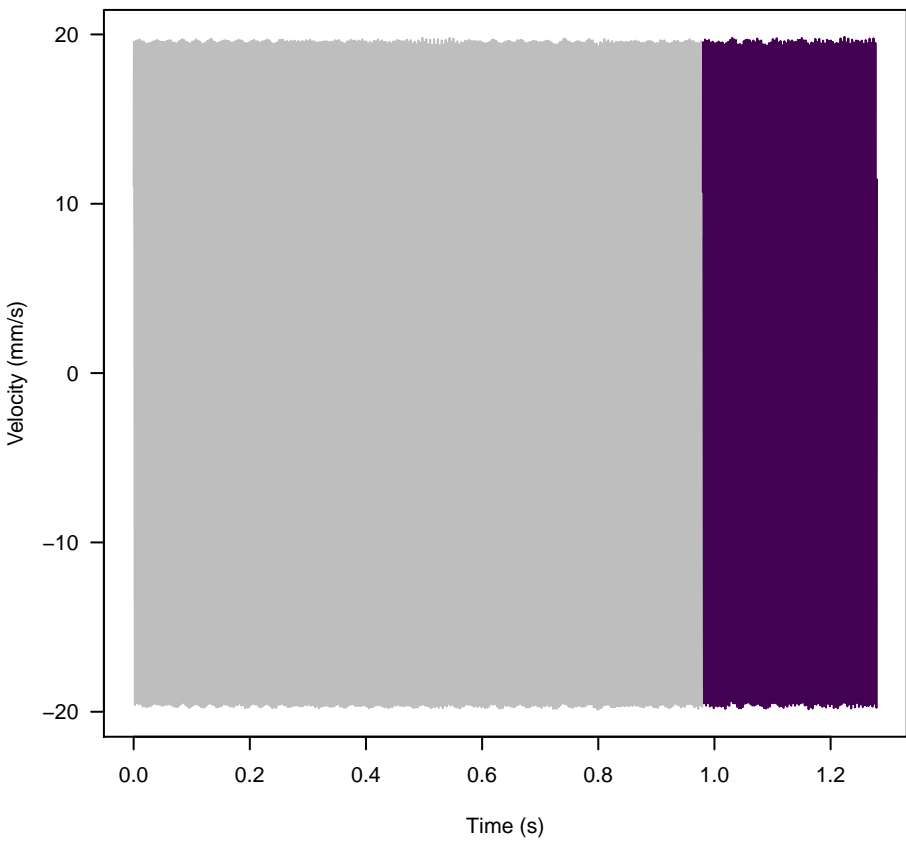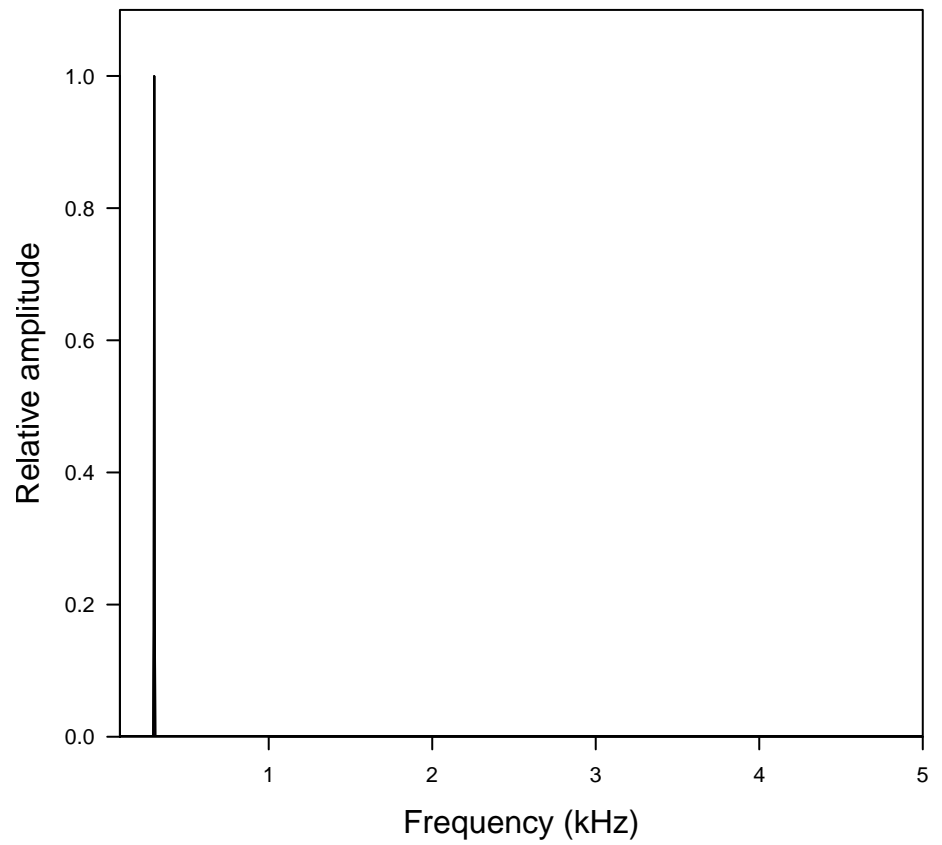

Vel. = 0.014 ; Str. = FA ; Axis = x ; Fl. accession = 10-s-81-11

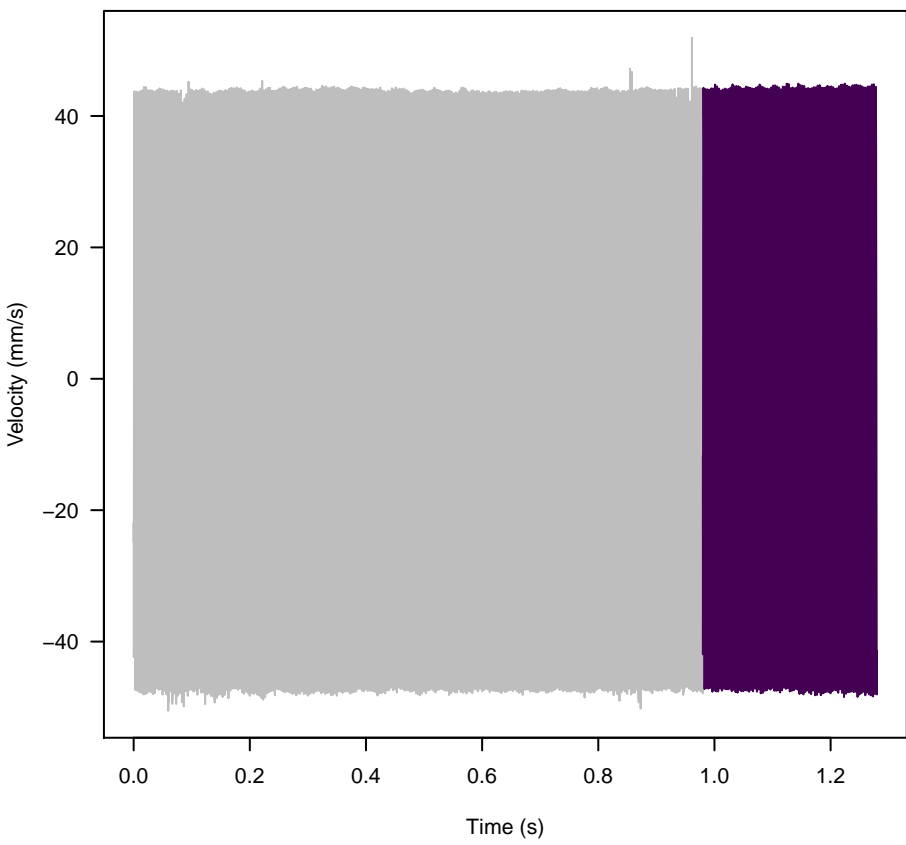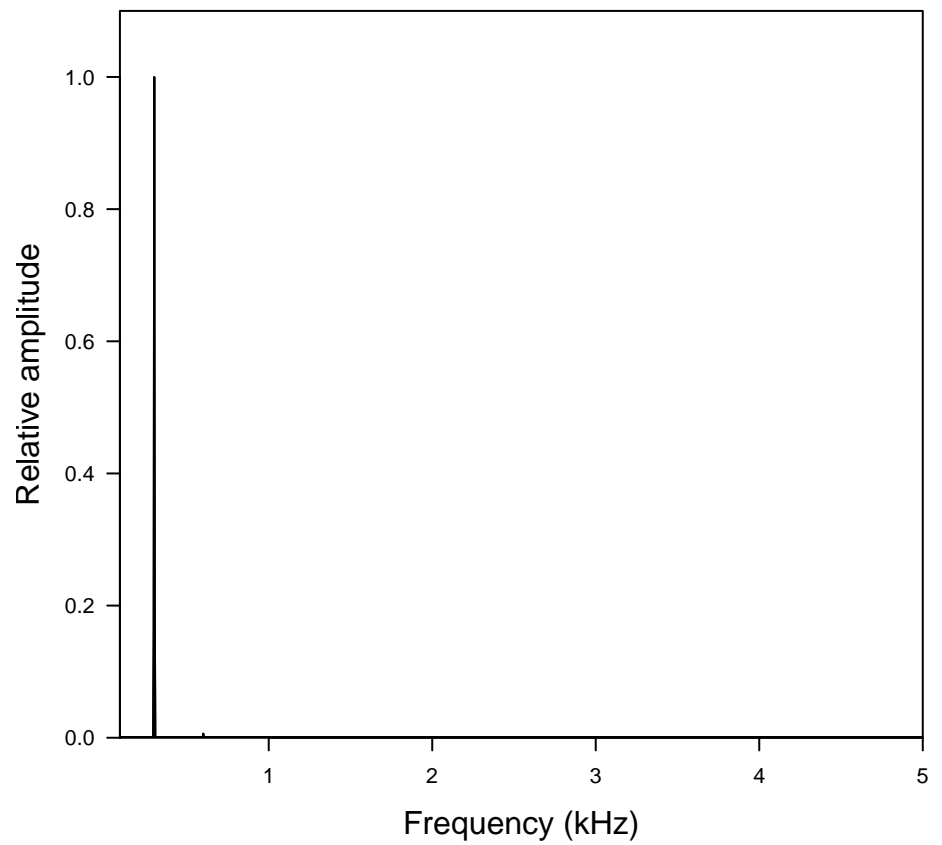

Vel. = 0.014 ; Str. = Receptacle ; Axis = x ; Fl. accession = 10-s-81-11

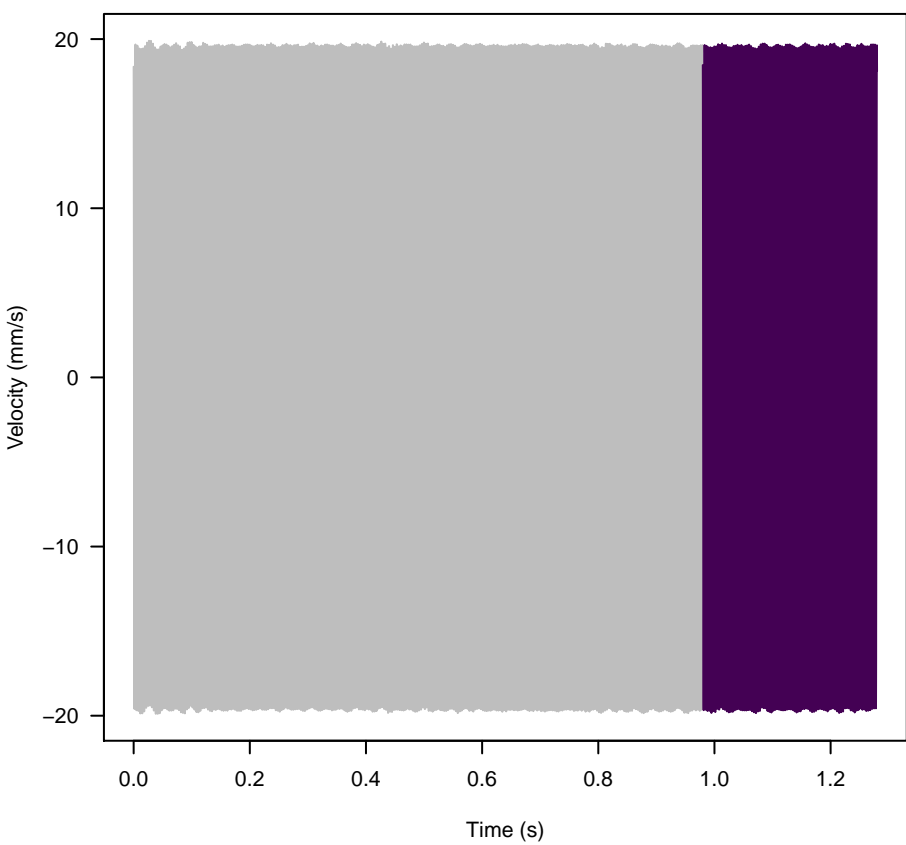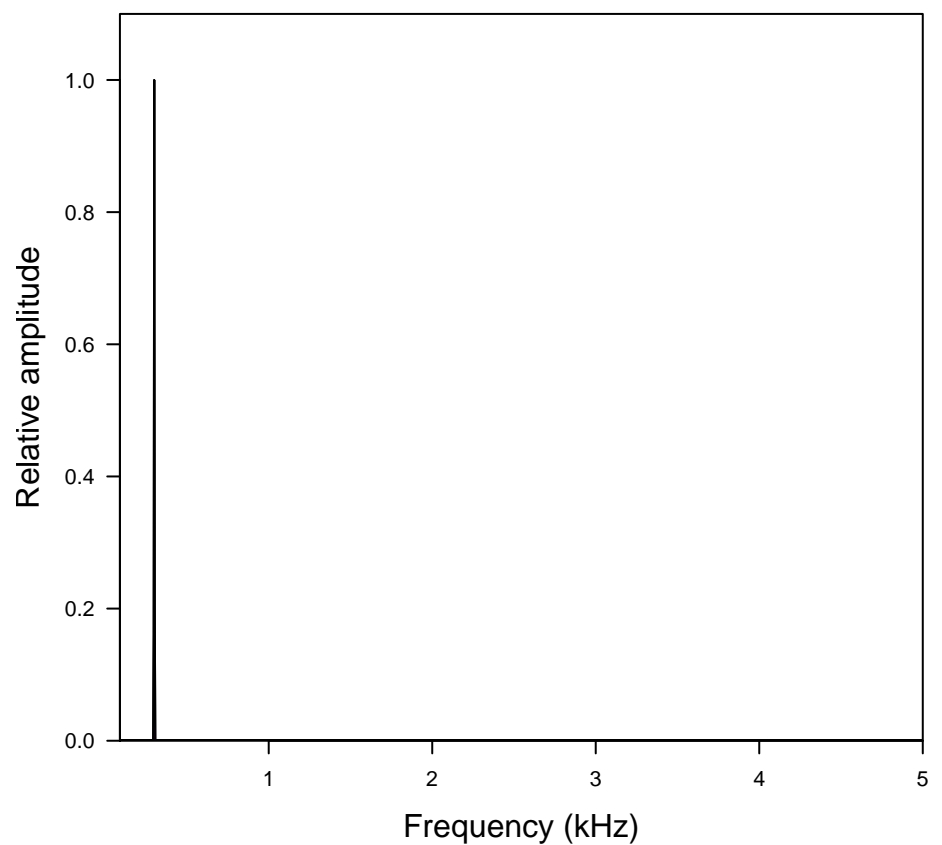

Vel. = 0.014 ; Str. = PA ; Axis = x ; Fl. accession = 10-s-81-11

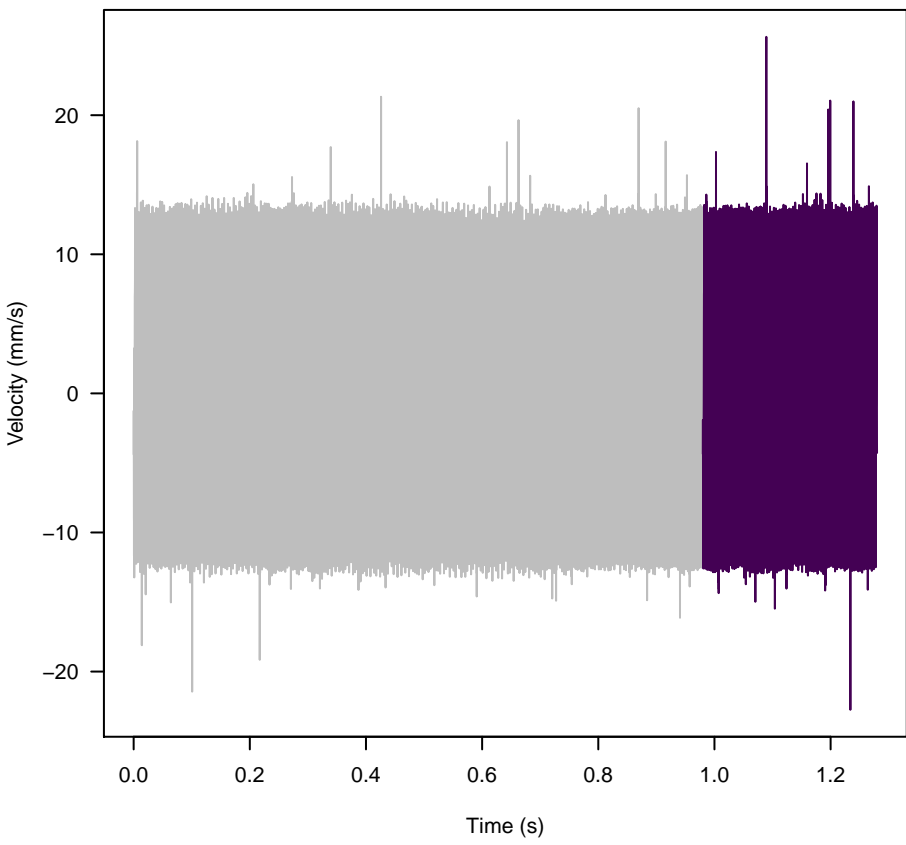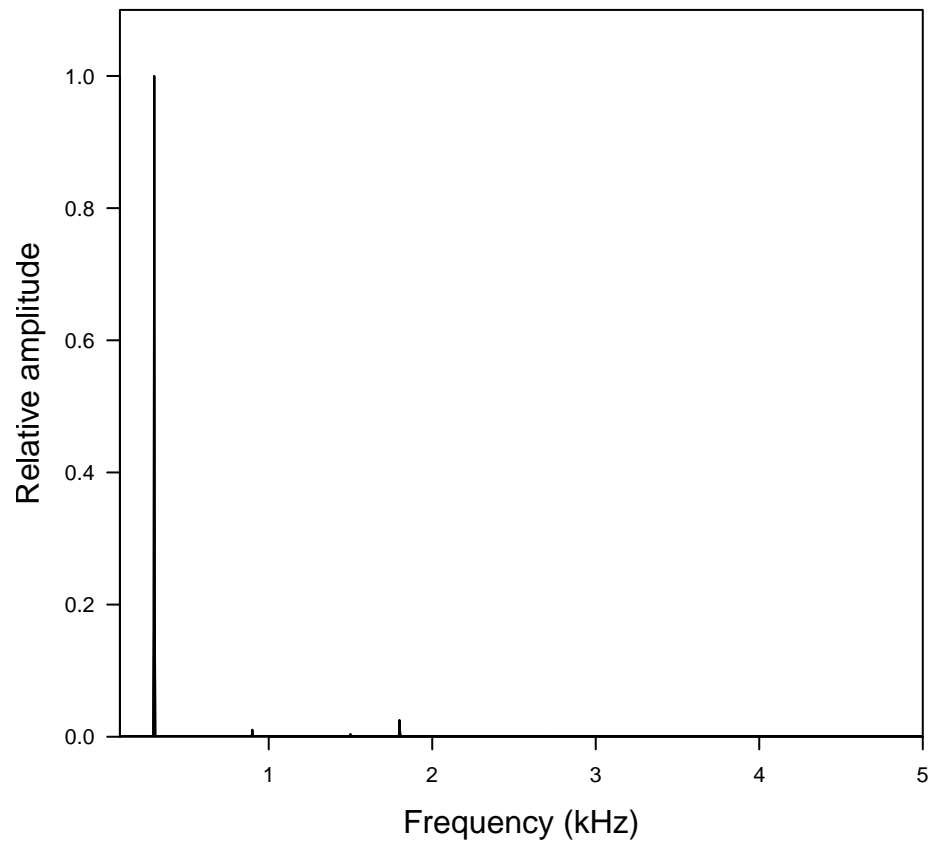

Vel. = 0.014 ; Str. = Receptacle ; Axis = x ; Fl. accession = 10-s-81-11

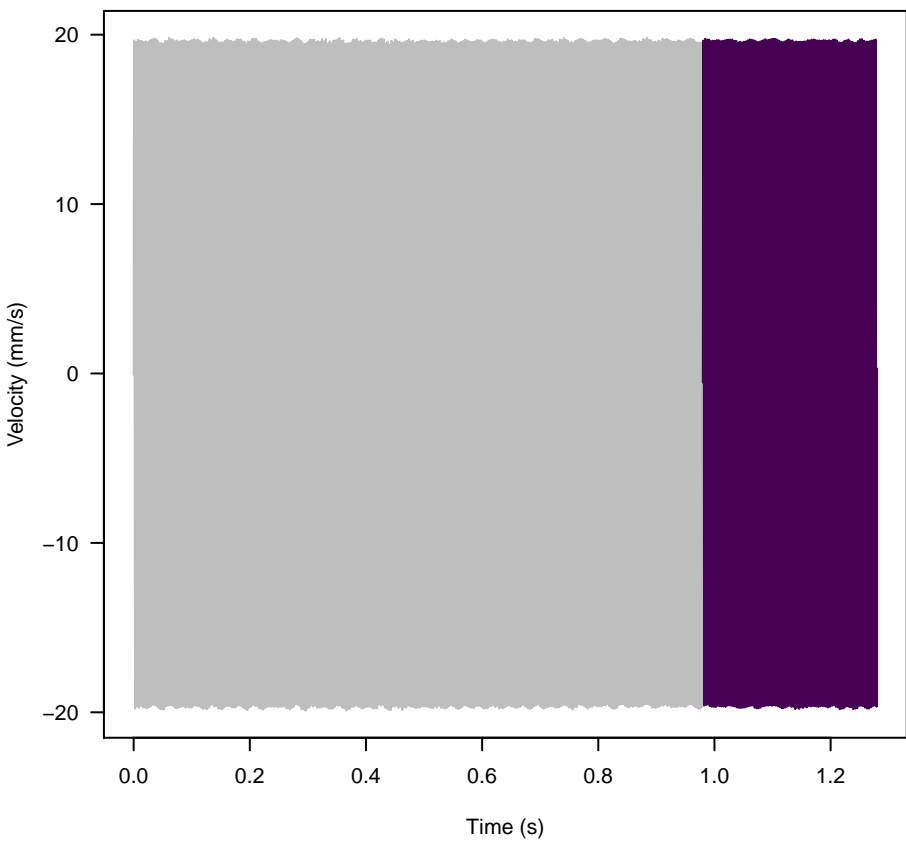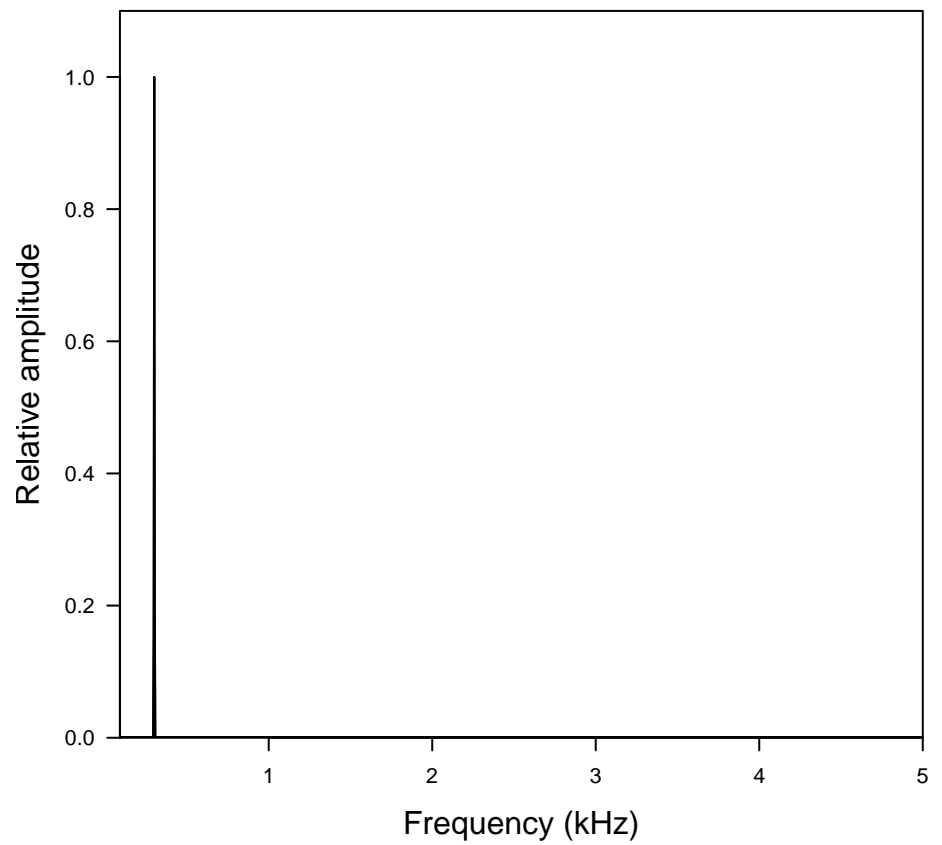

Vel. = 0.028 ; Str. = PA ; Axis = x ; Fl. accession = 10-s-81-11

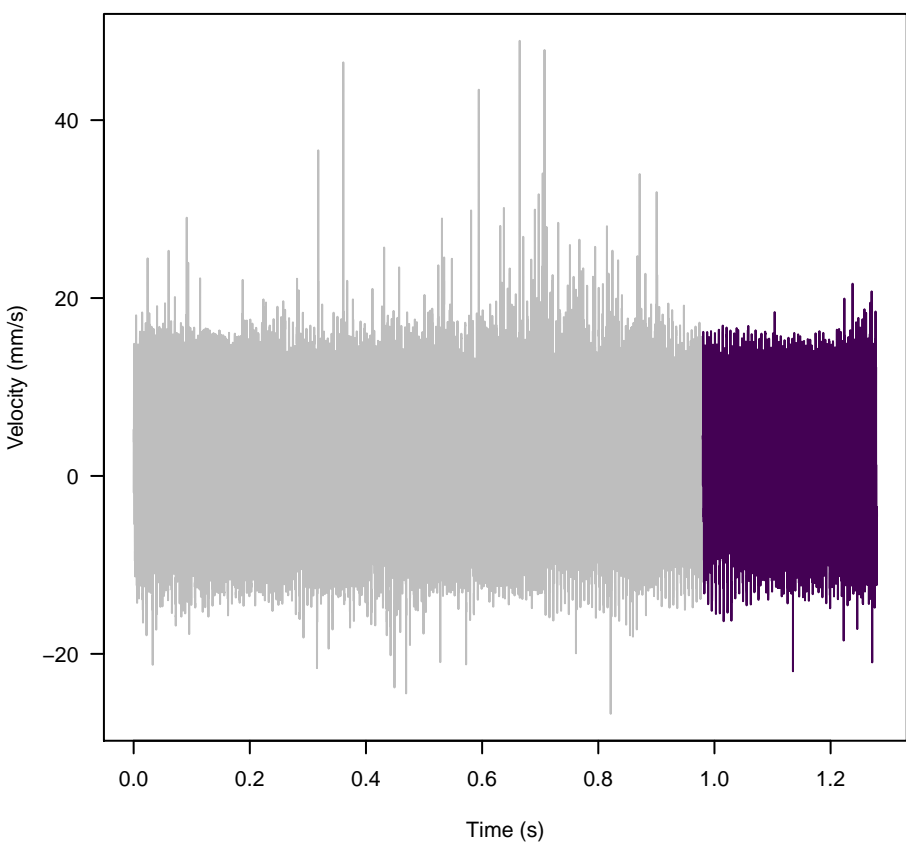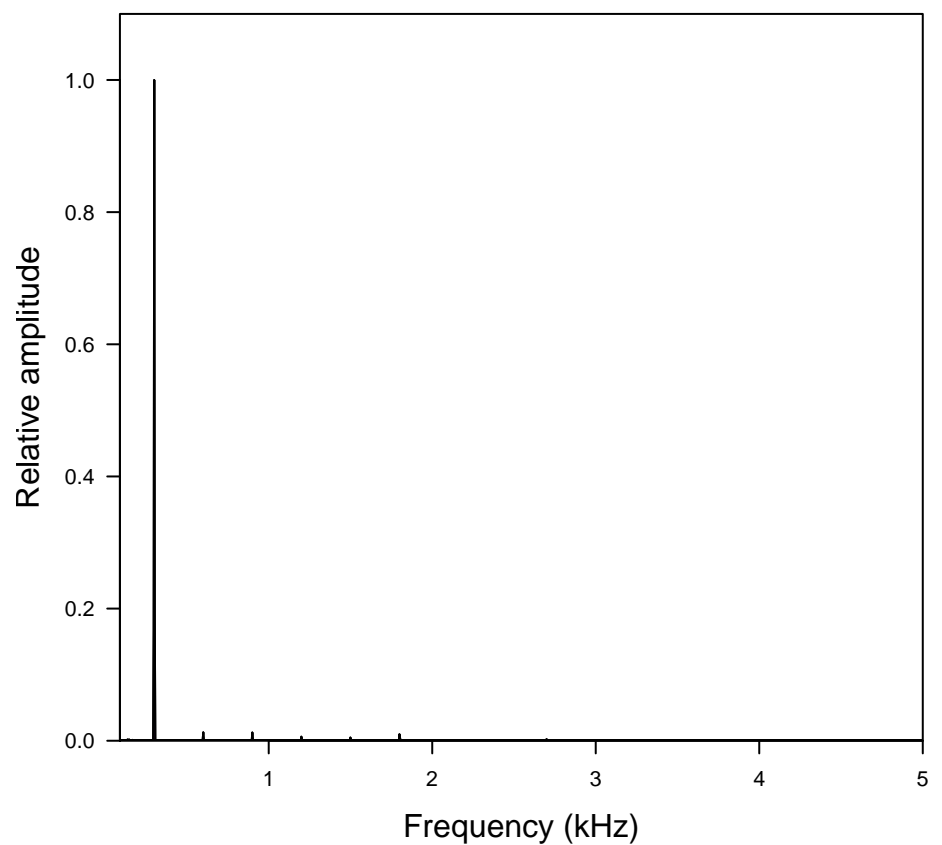



Vel. = 0.028 ; Str. = Receptacle ; Axis = x ; Fl. accession = 10-s-81-11

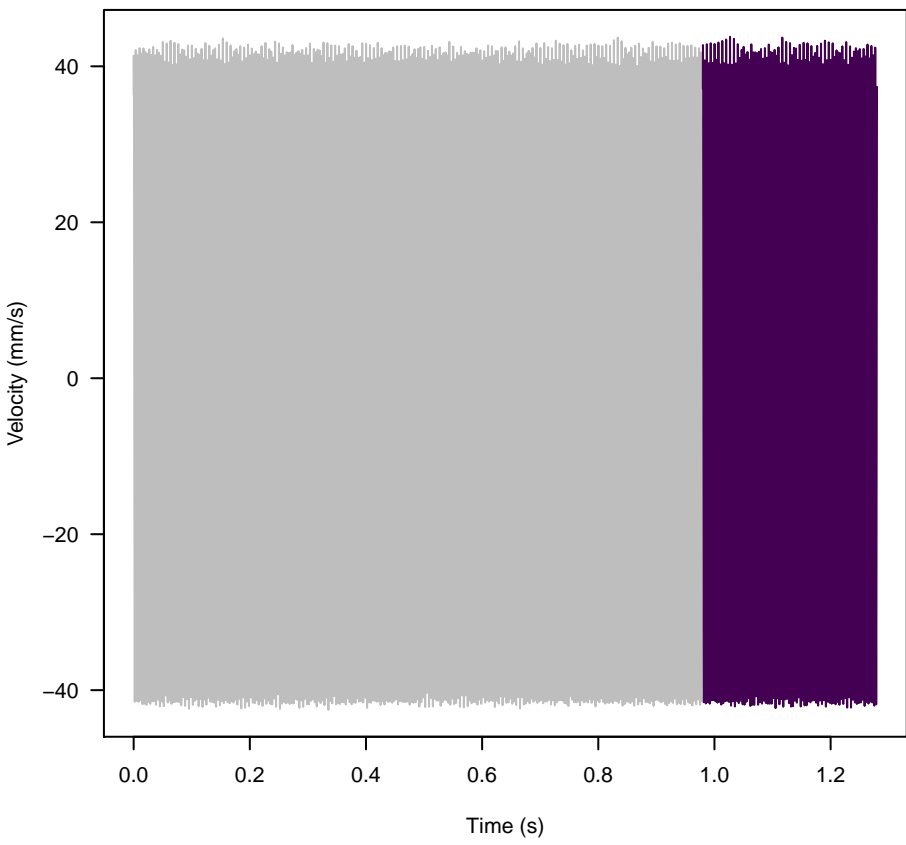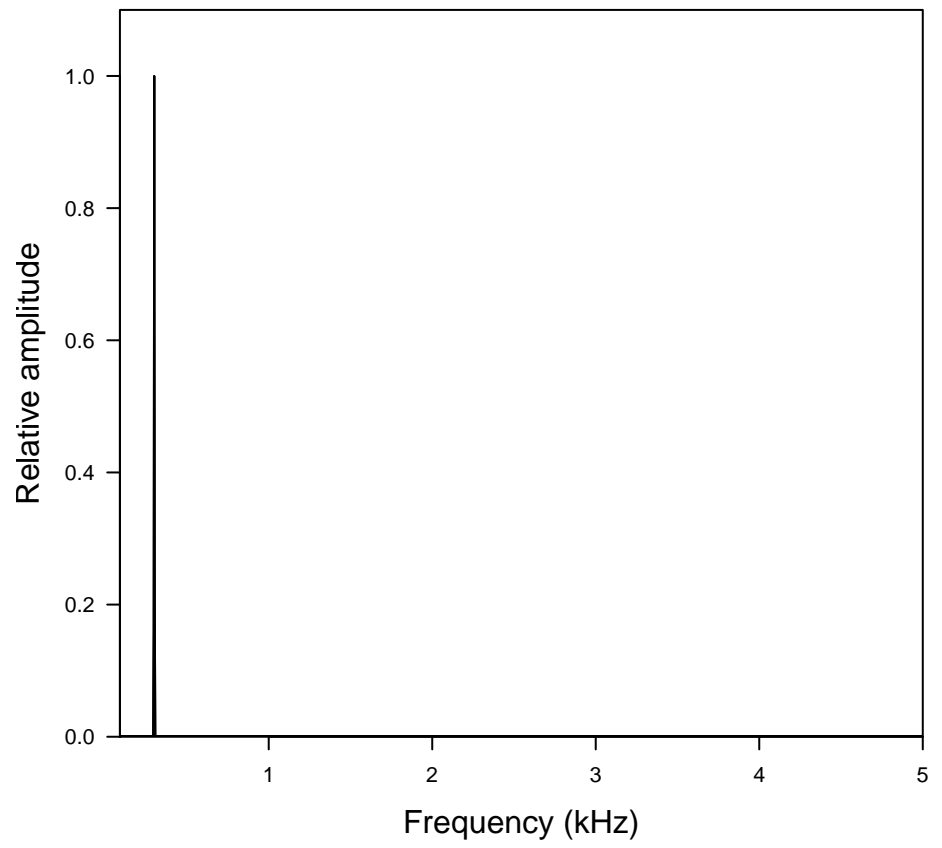

Vel. = 0.028 ; Str. = FA ; Axis = x ; Fl. accession = 10-s-81-11

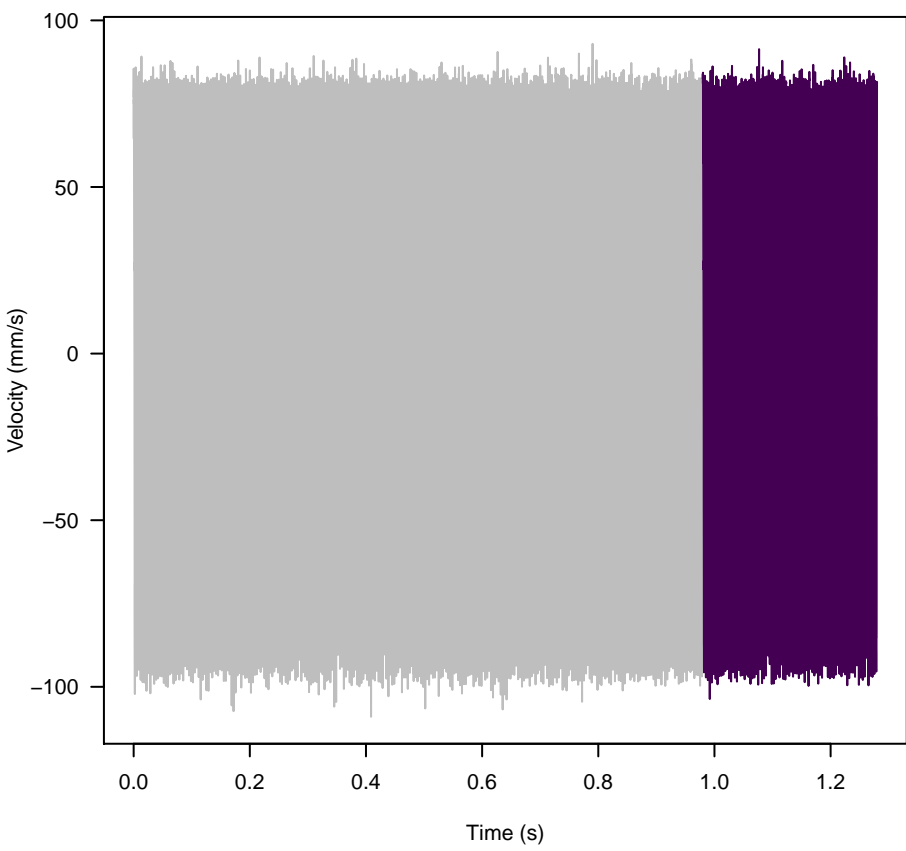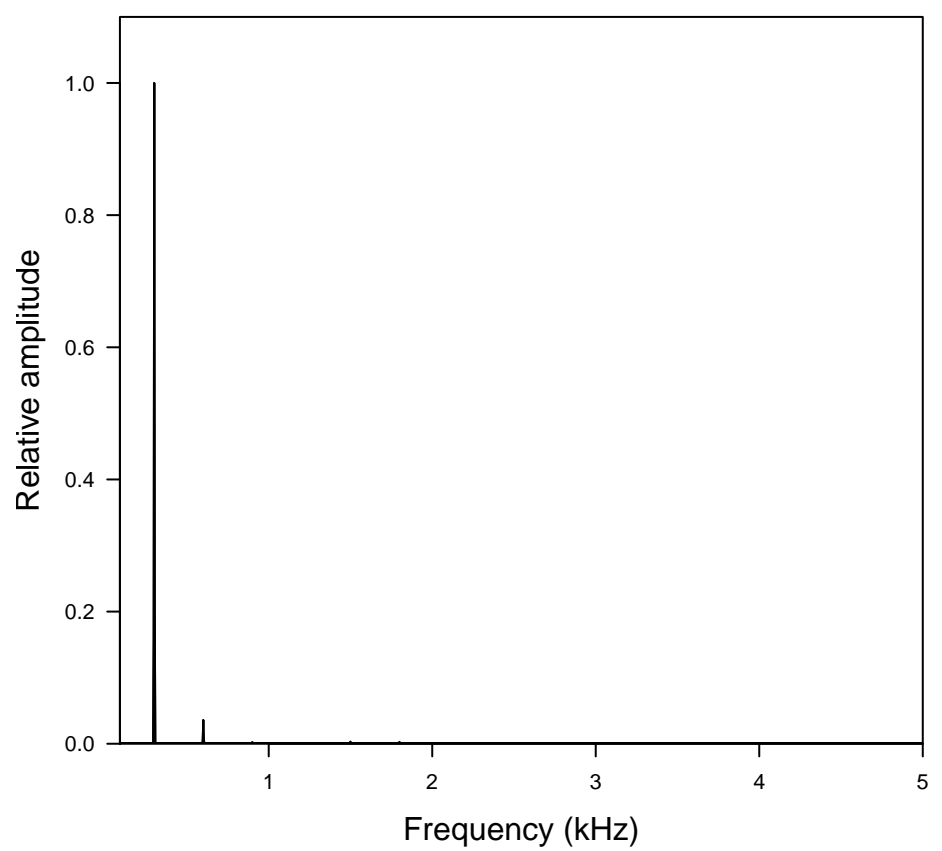

Vel. = 0.028 ; Str. = Receptacle ; Axis = x ; Fl. accession = 10-s-81-11

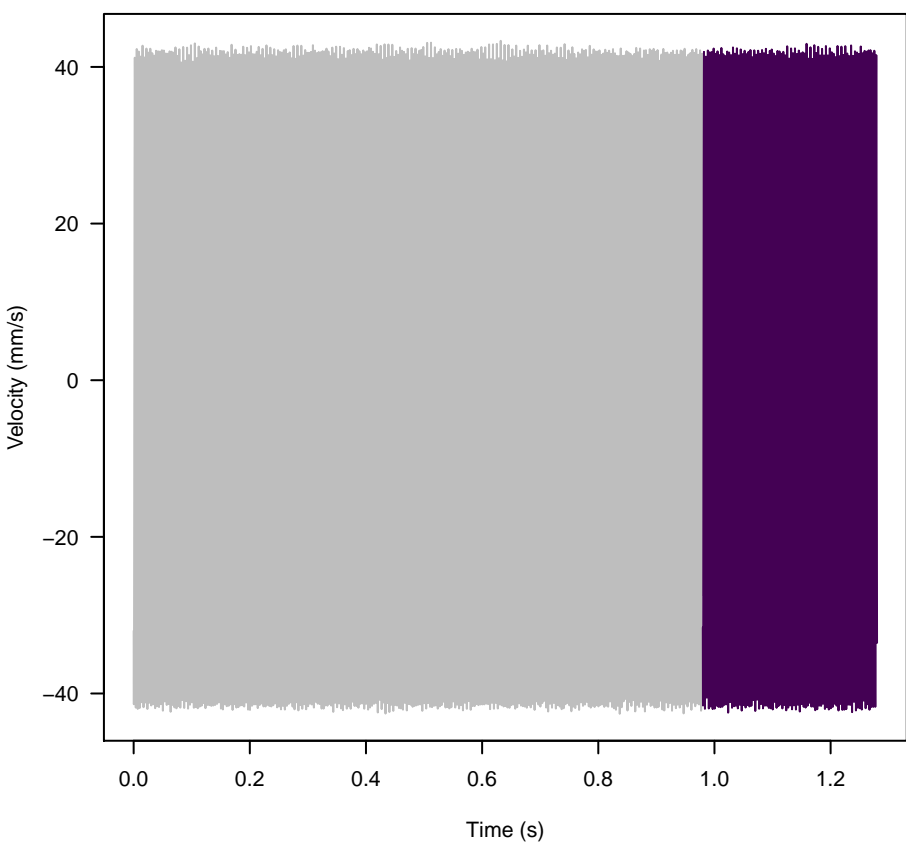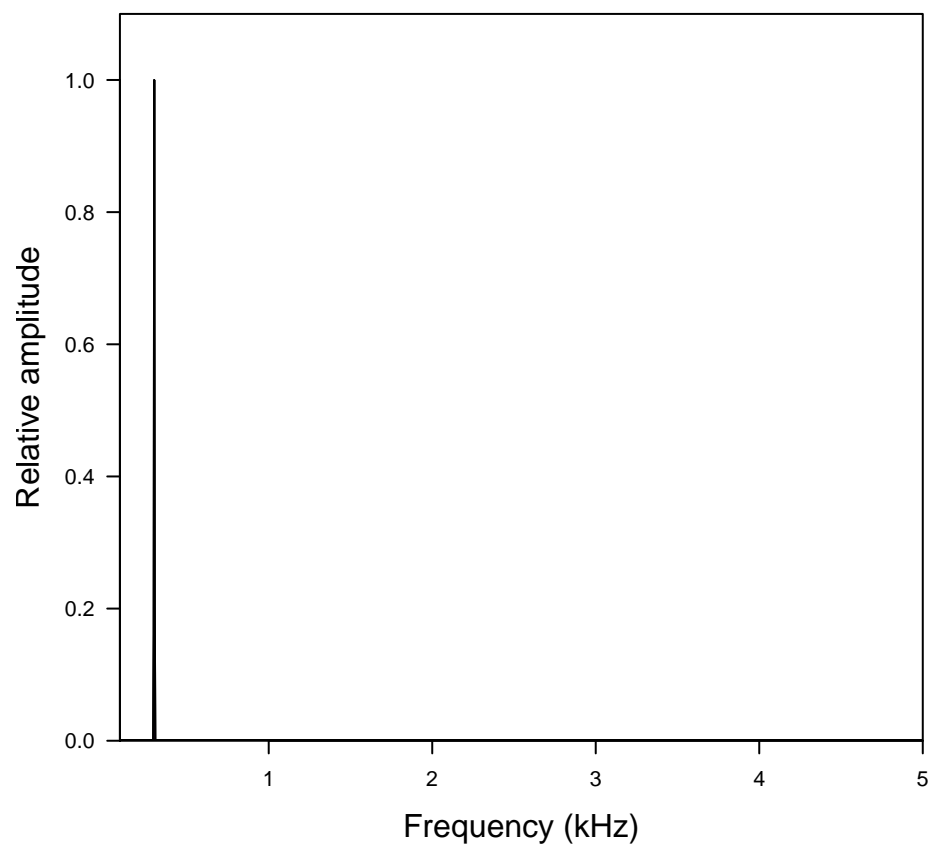

Vel. = 0.028 ; Str. = Corolla ; Axis = x ; Fl. accession = 10-s-81-11

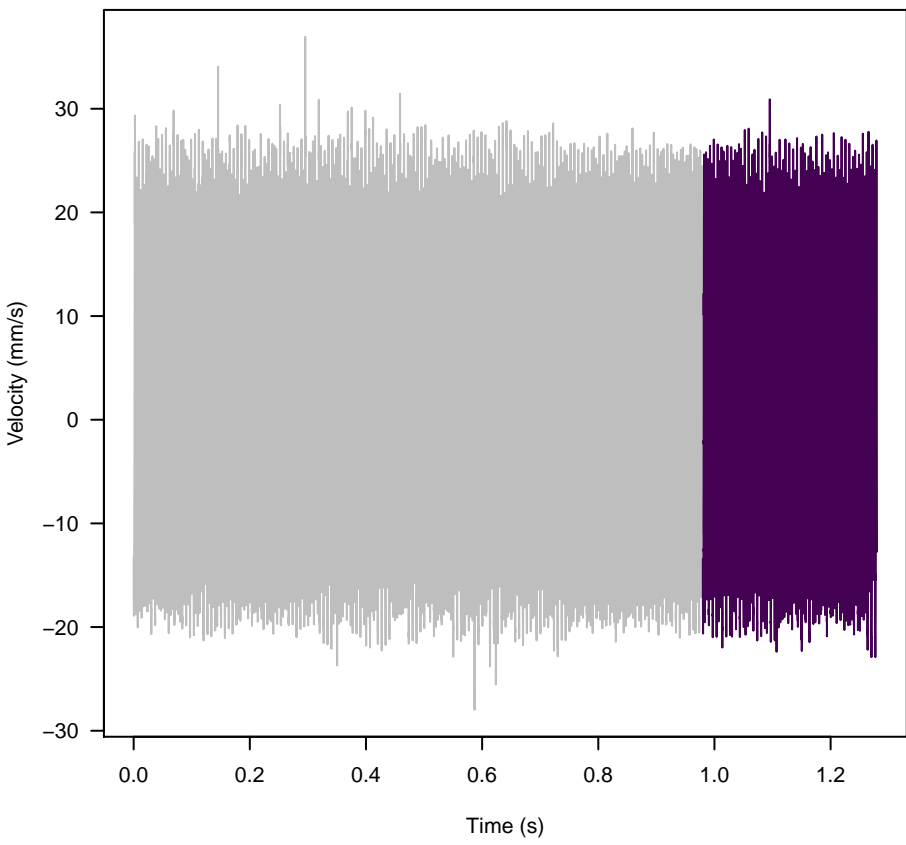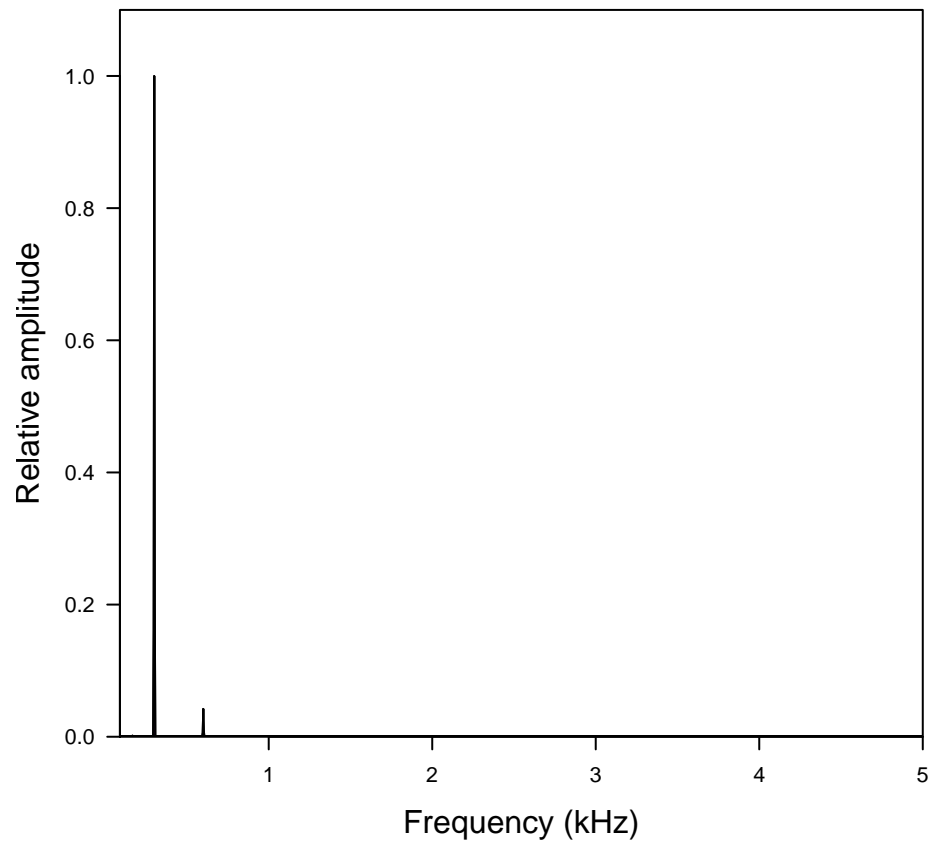

Vel. = 0.028 ; Str. = Receptacle ; Axis = x ; Fl. accession = 10-s-81-11

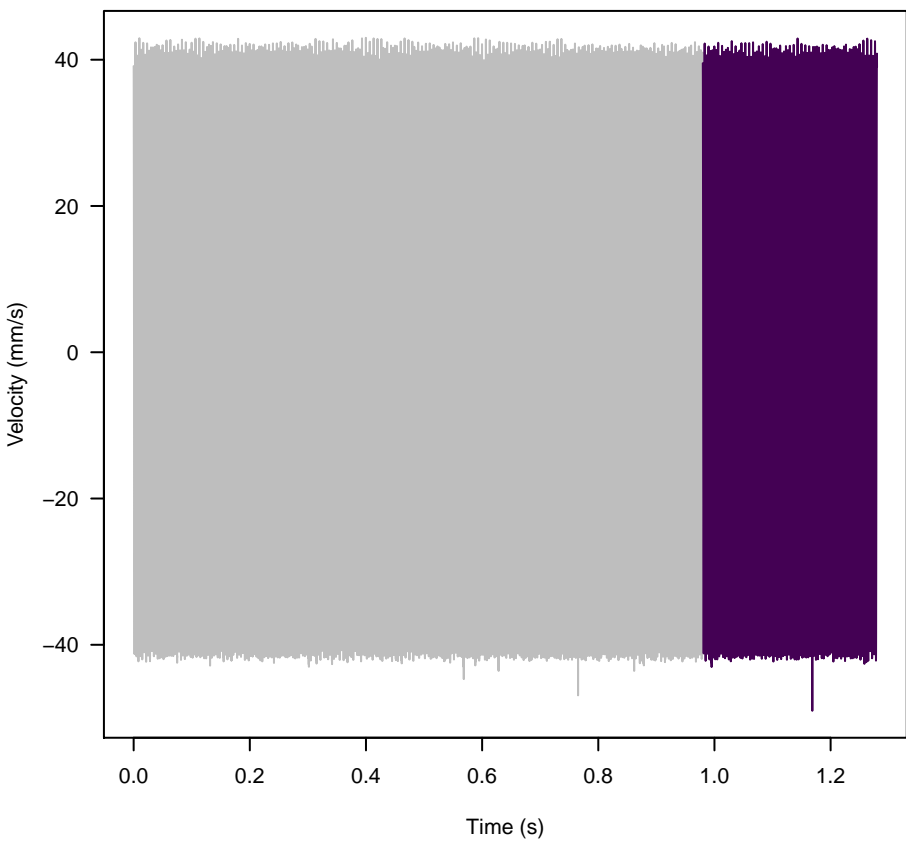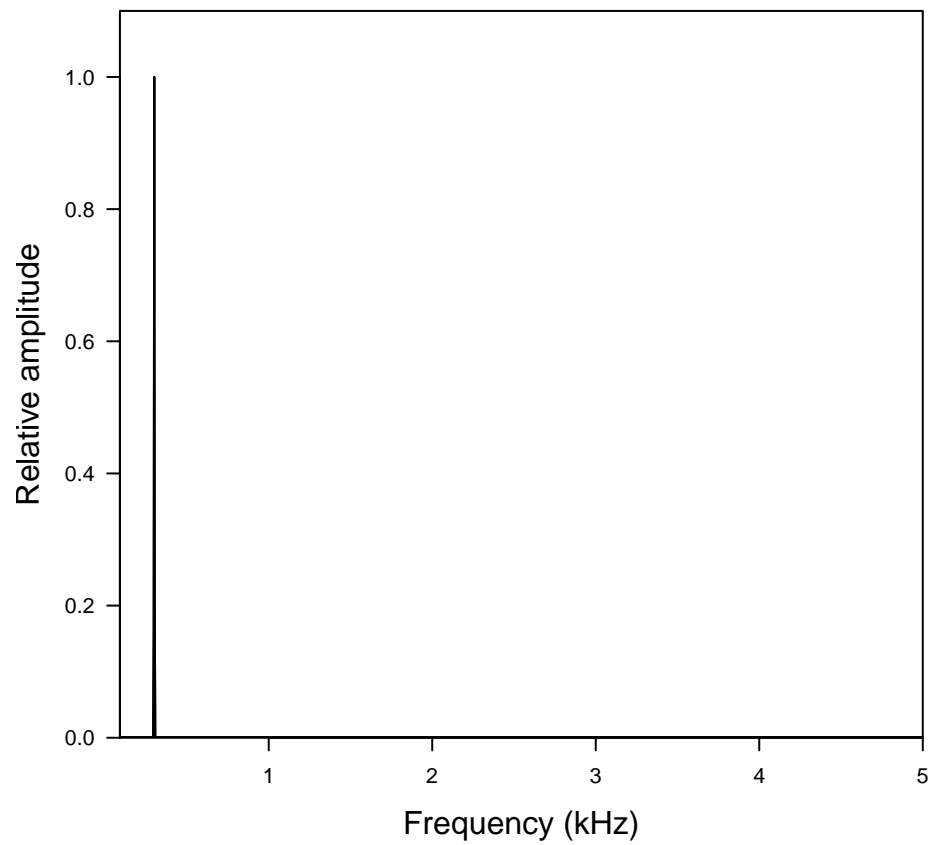

Vel. = 0.057 ; Str. = Corolla ; Axis = x ; Fl. accession = 10-s-81-11

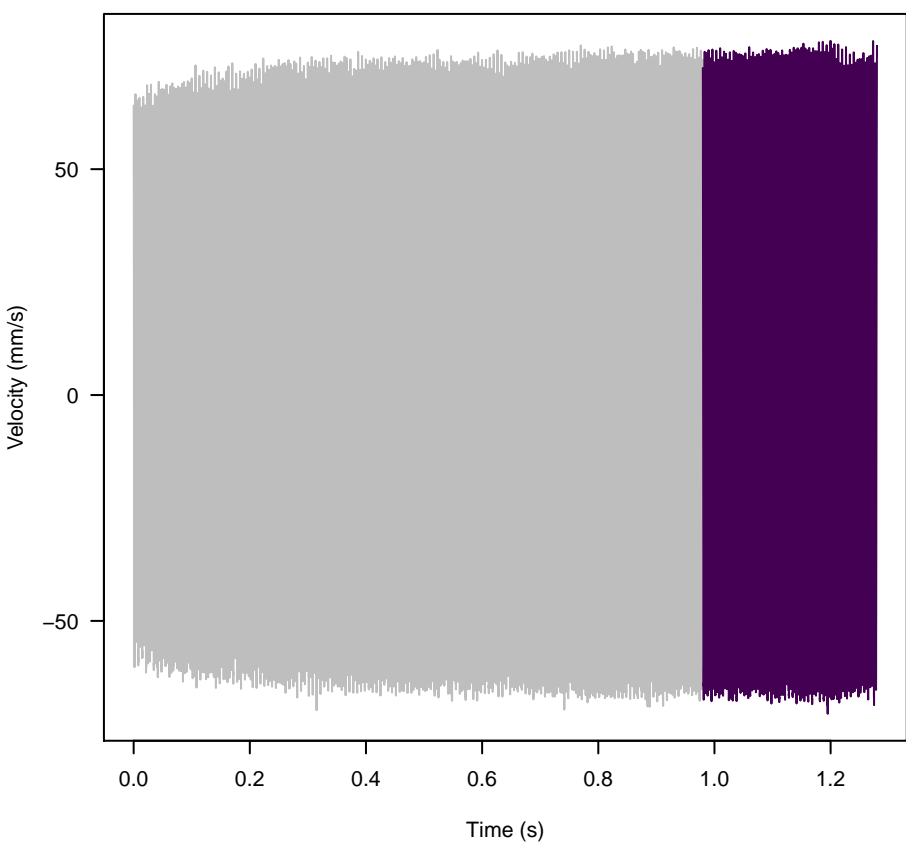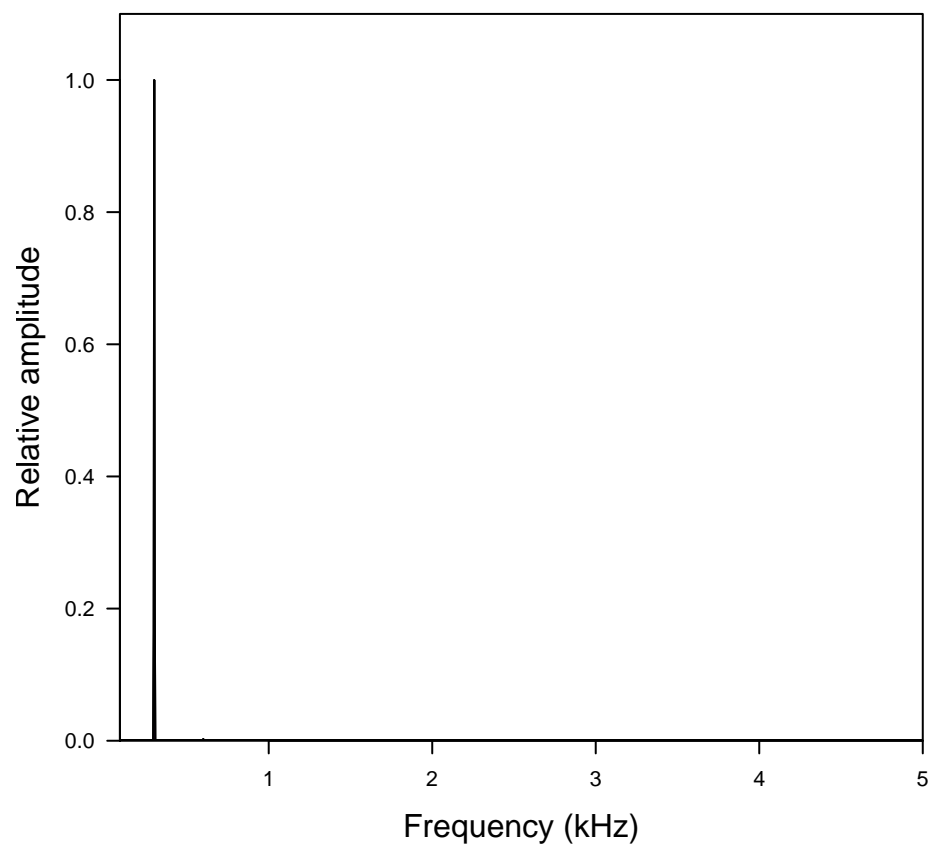

Vel. = 0.057 ; Str. = Receptacle ; Axis = x ; Fl. accession = 10-s-81-11

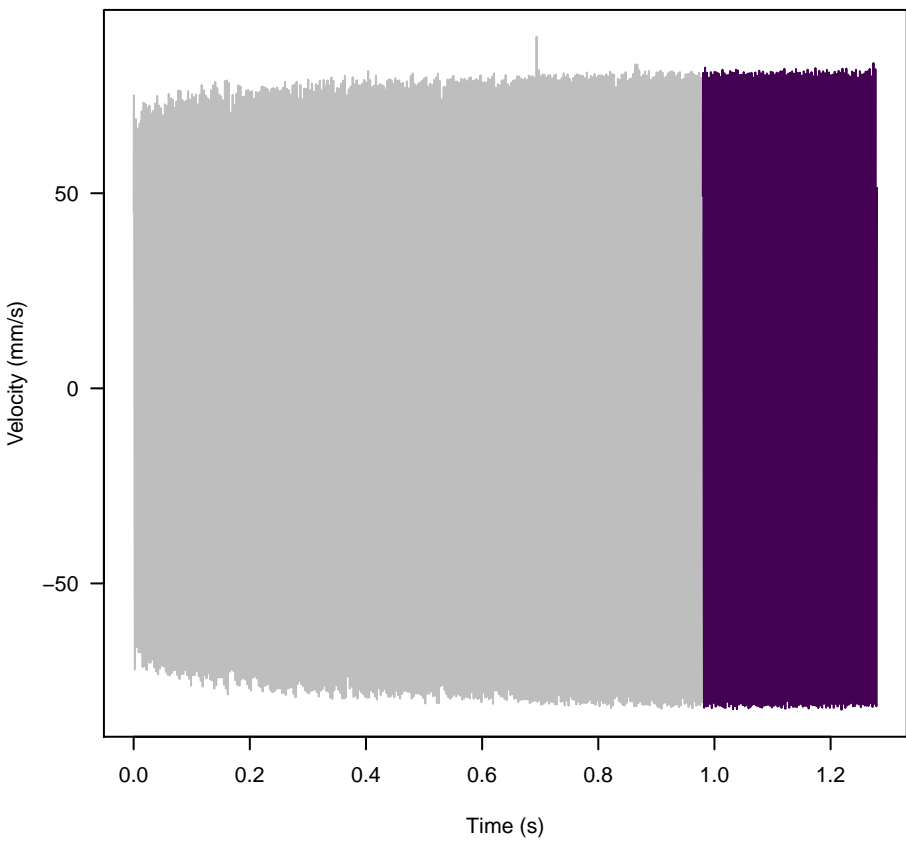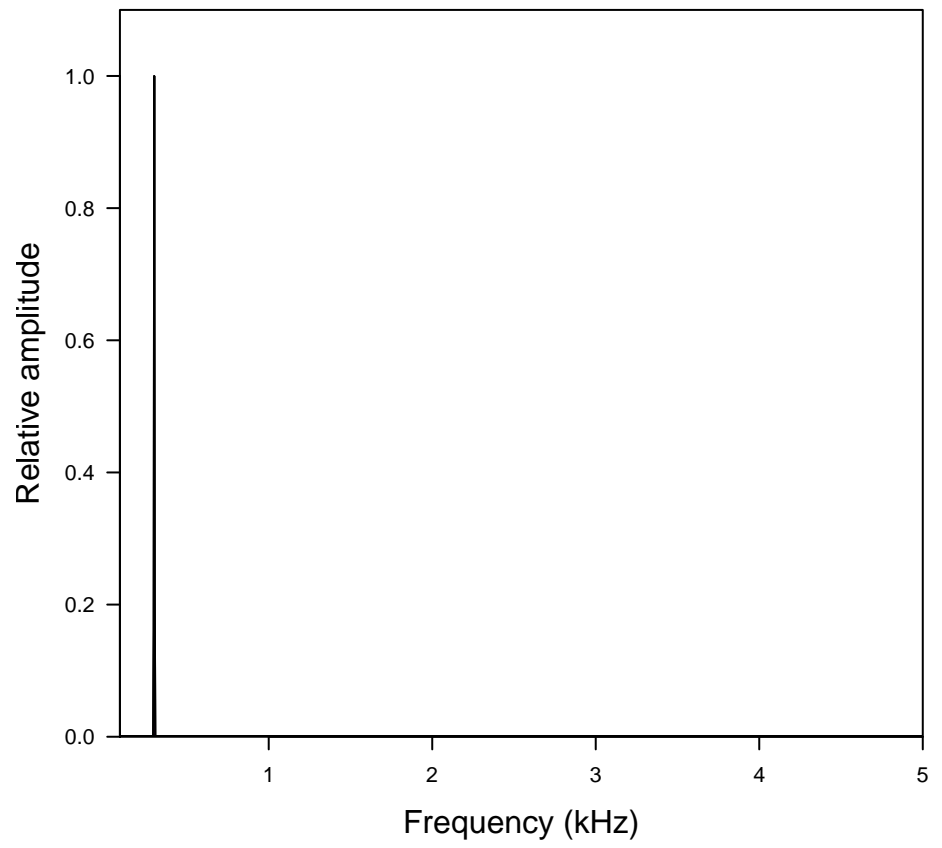

Vel. = 0.057 ; Str. = FA ; Axis = x ; Fl. accession = 10-s-81-11

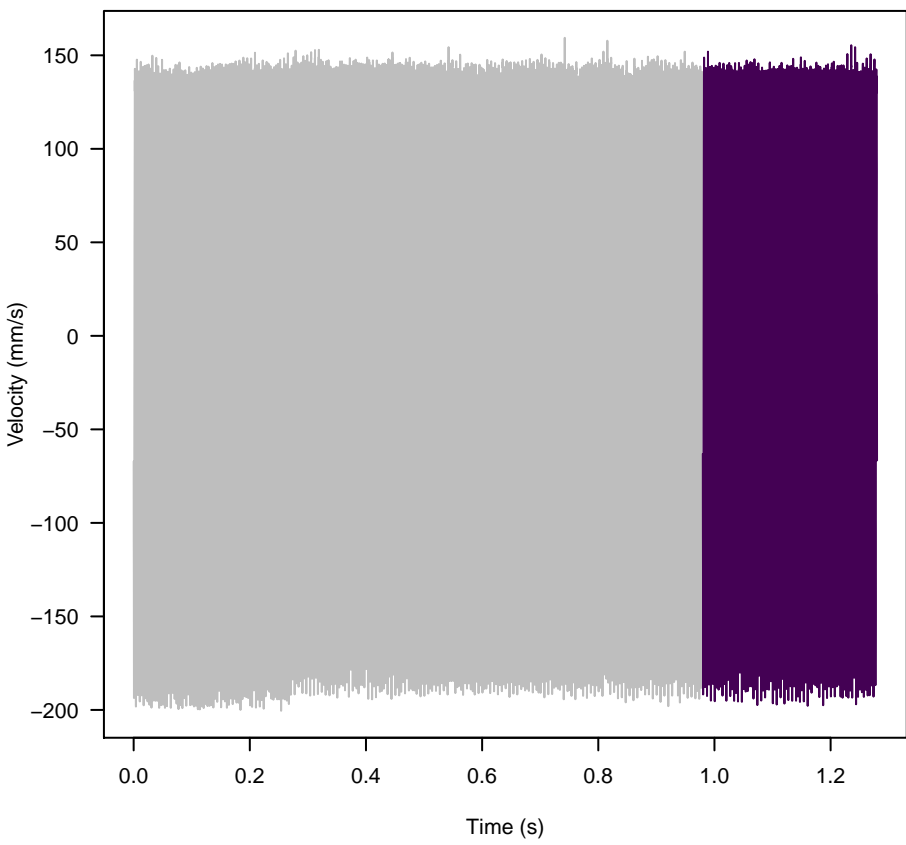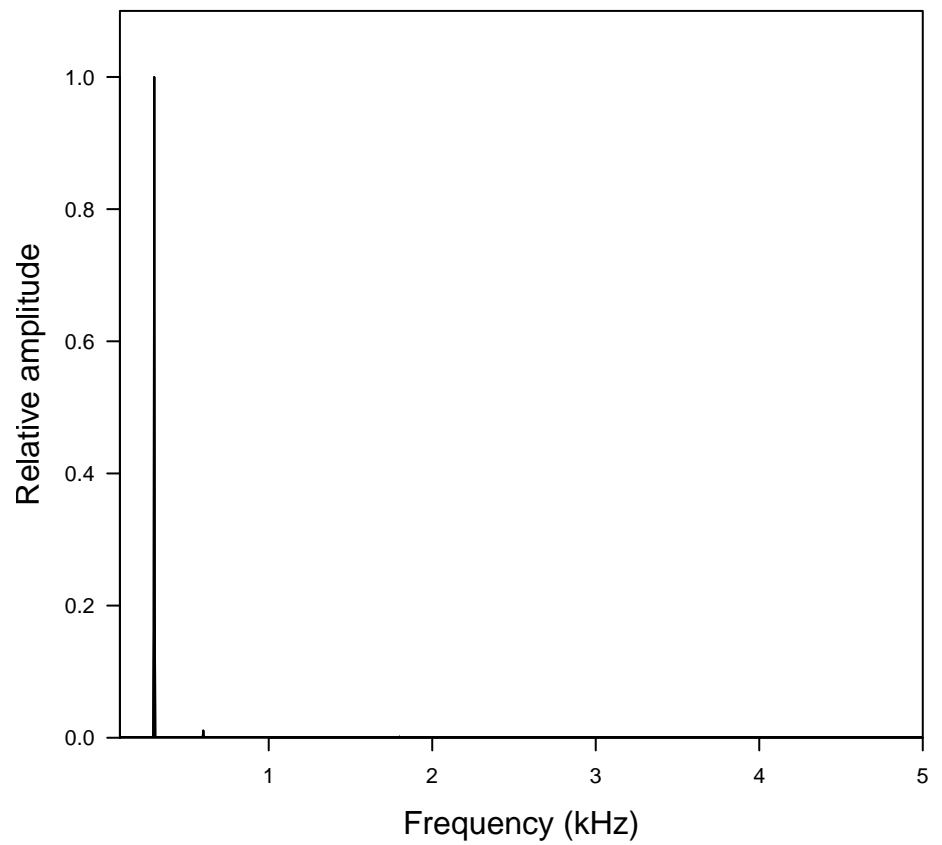

Vel. = 0.057 ; Str. = Receptacle ; Axis = x ; Fl. accession = 10-s-81-11

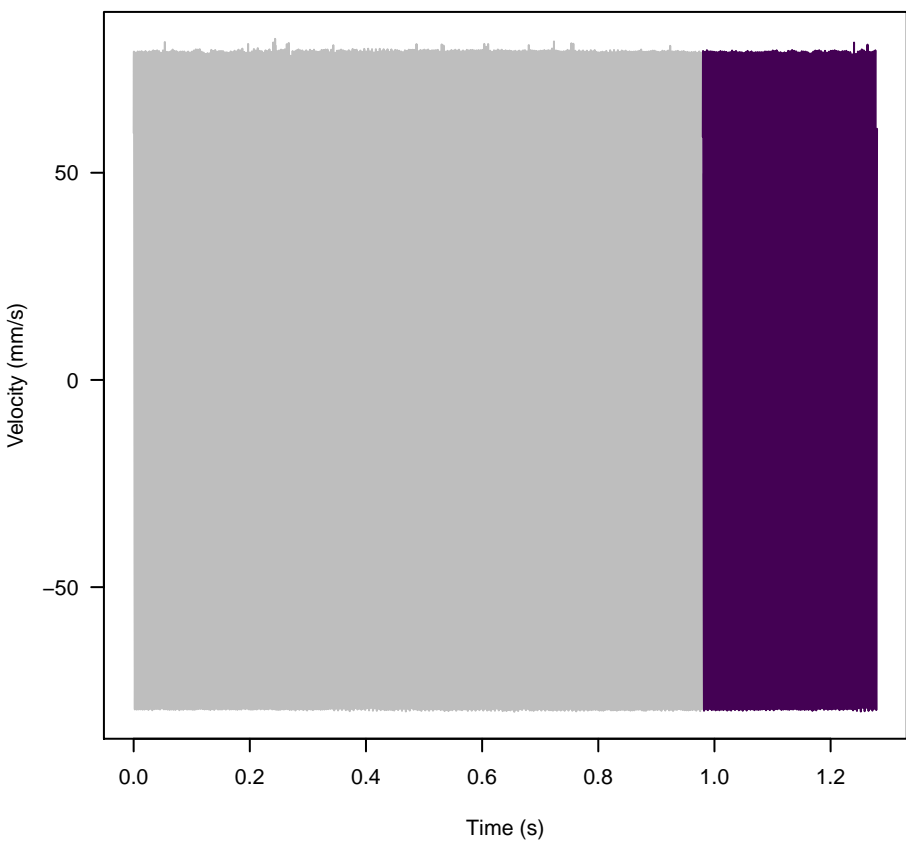

Vel. = 0.057 ; Str. = PA ; Axis = x ; Fl. accession = 10-s-81-11

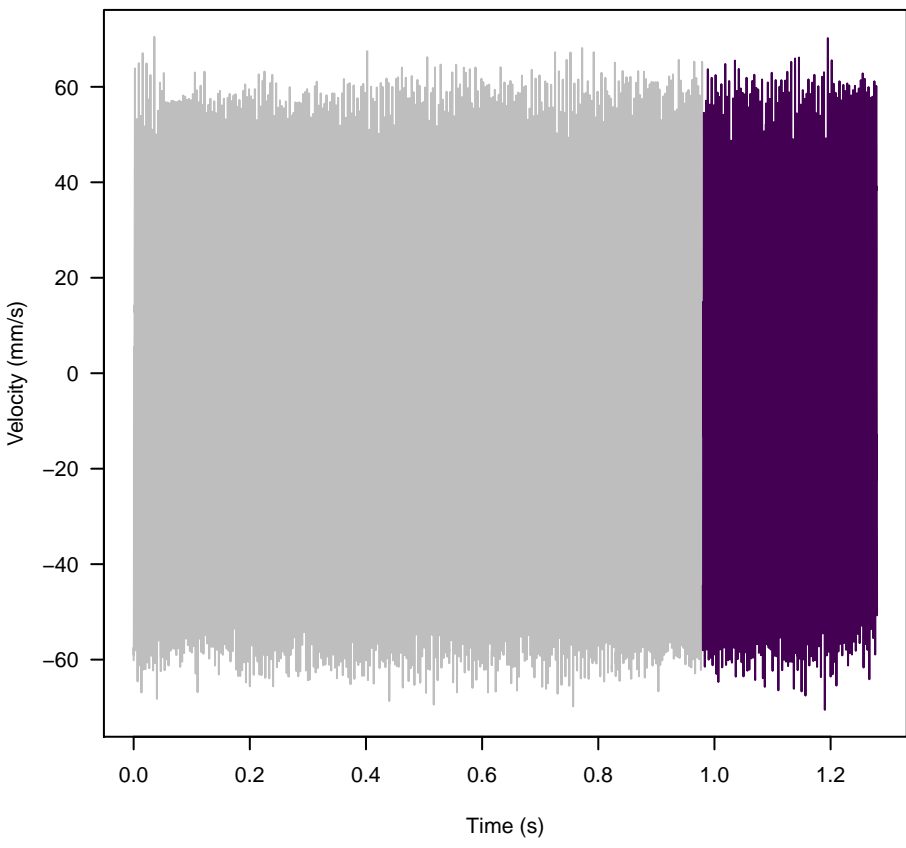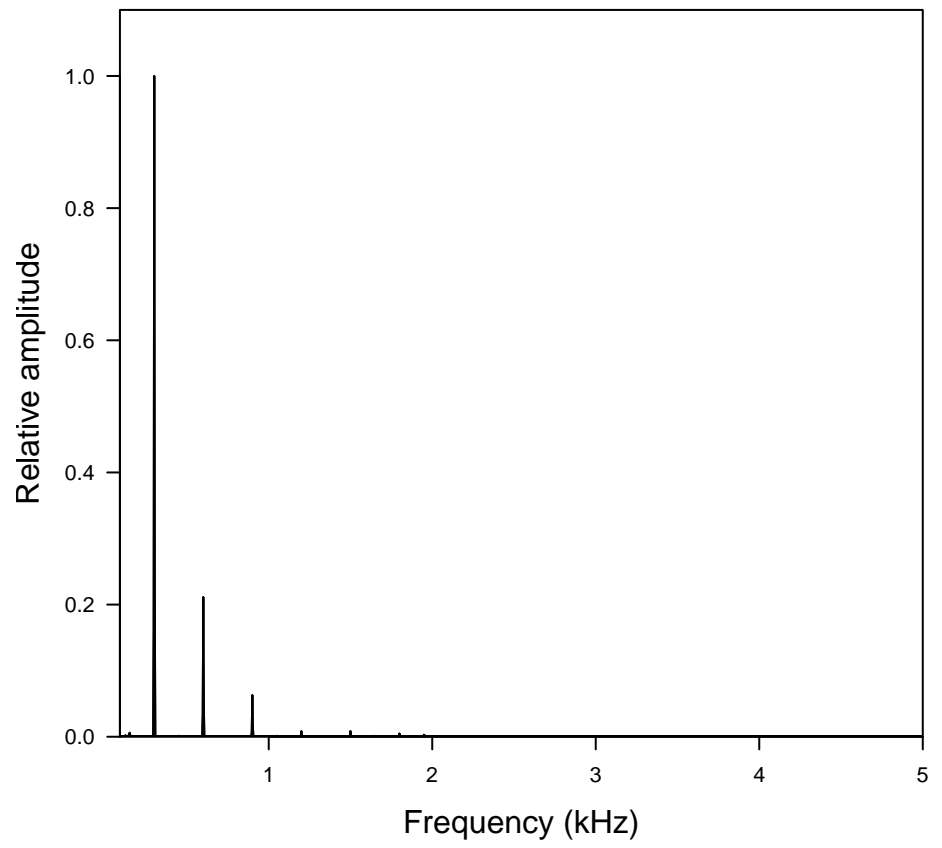

Vel. = 0.057 ; Str. = Receptacle ; Axis = x ; Fl. accession = 10-s-81-11

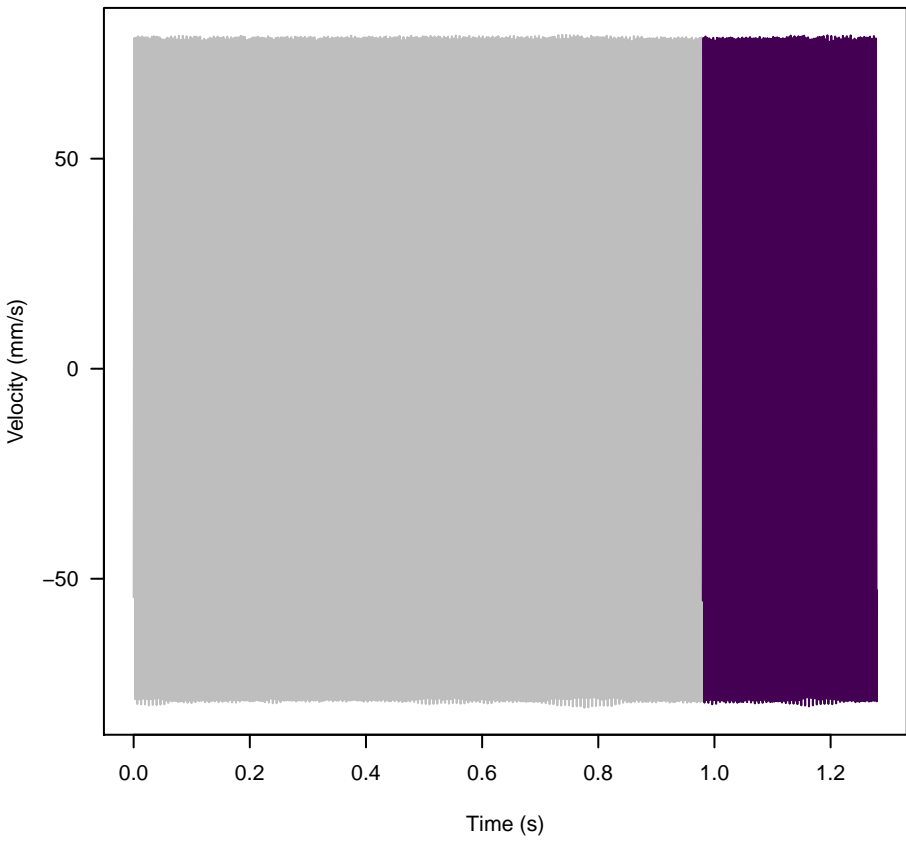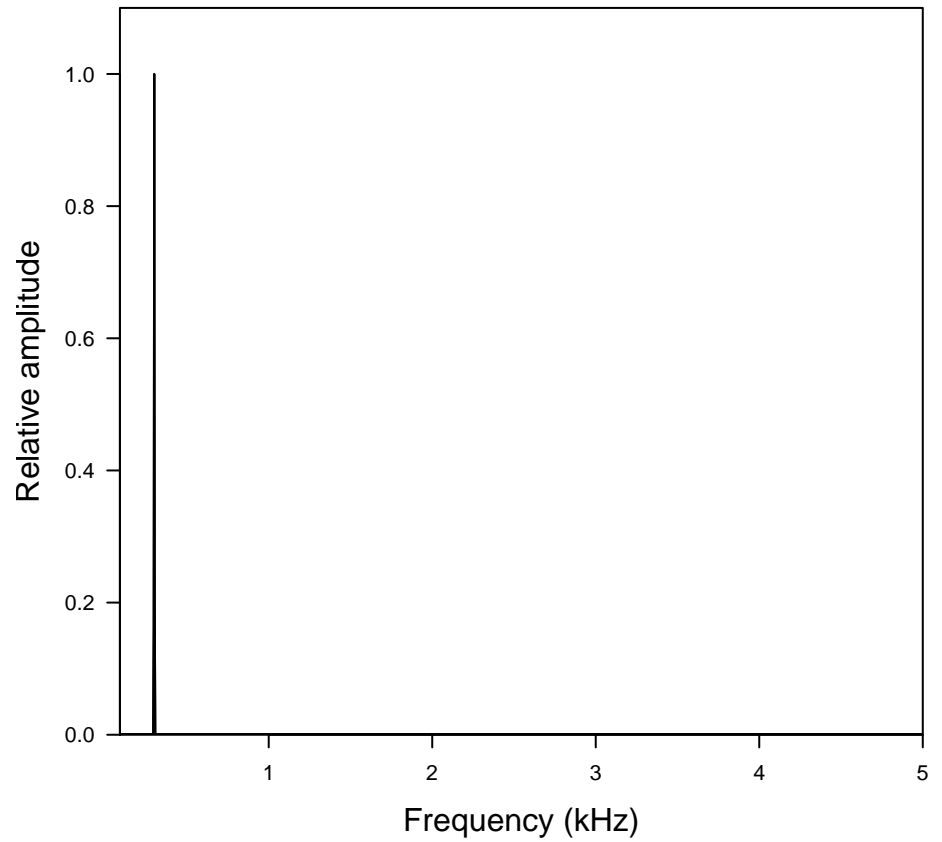

Supplement: rsos201010supp2.pdf [file rsos201010supp2.pdf]
