# Supplementary material for: Biomechanical properties of a buzz-pollinated flower
Source: PubMed Central journal article supplement (PMC7540744; doi:10.1098/rsos.201010), 2020-09-16

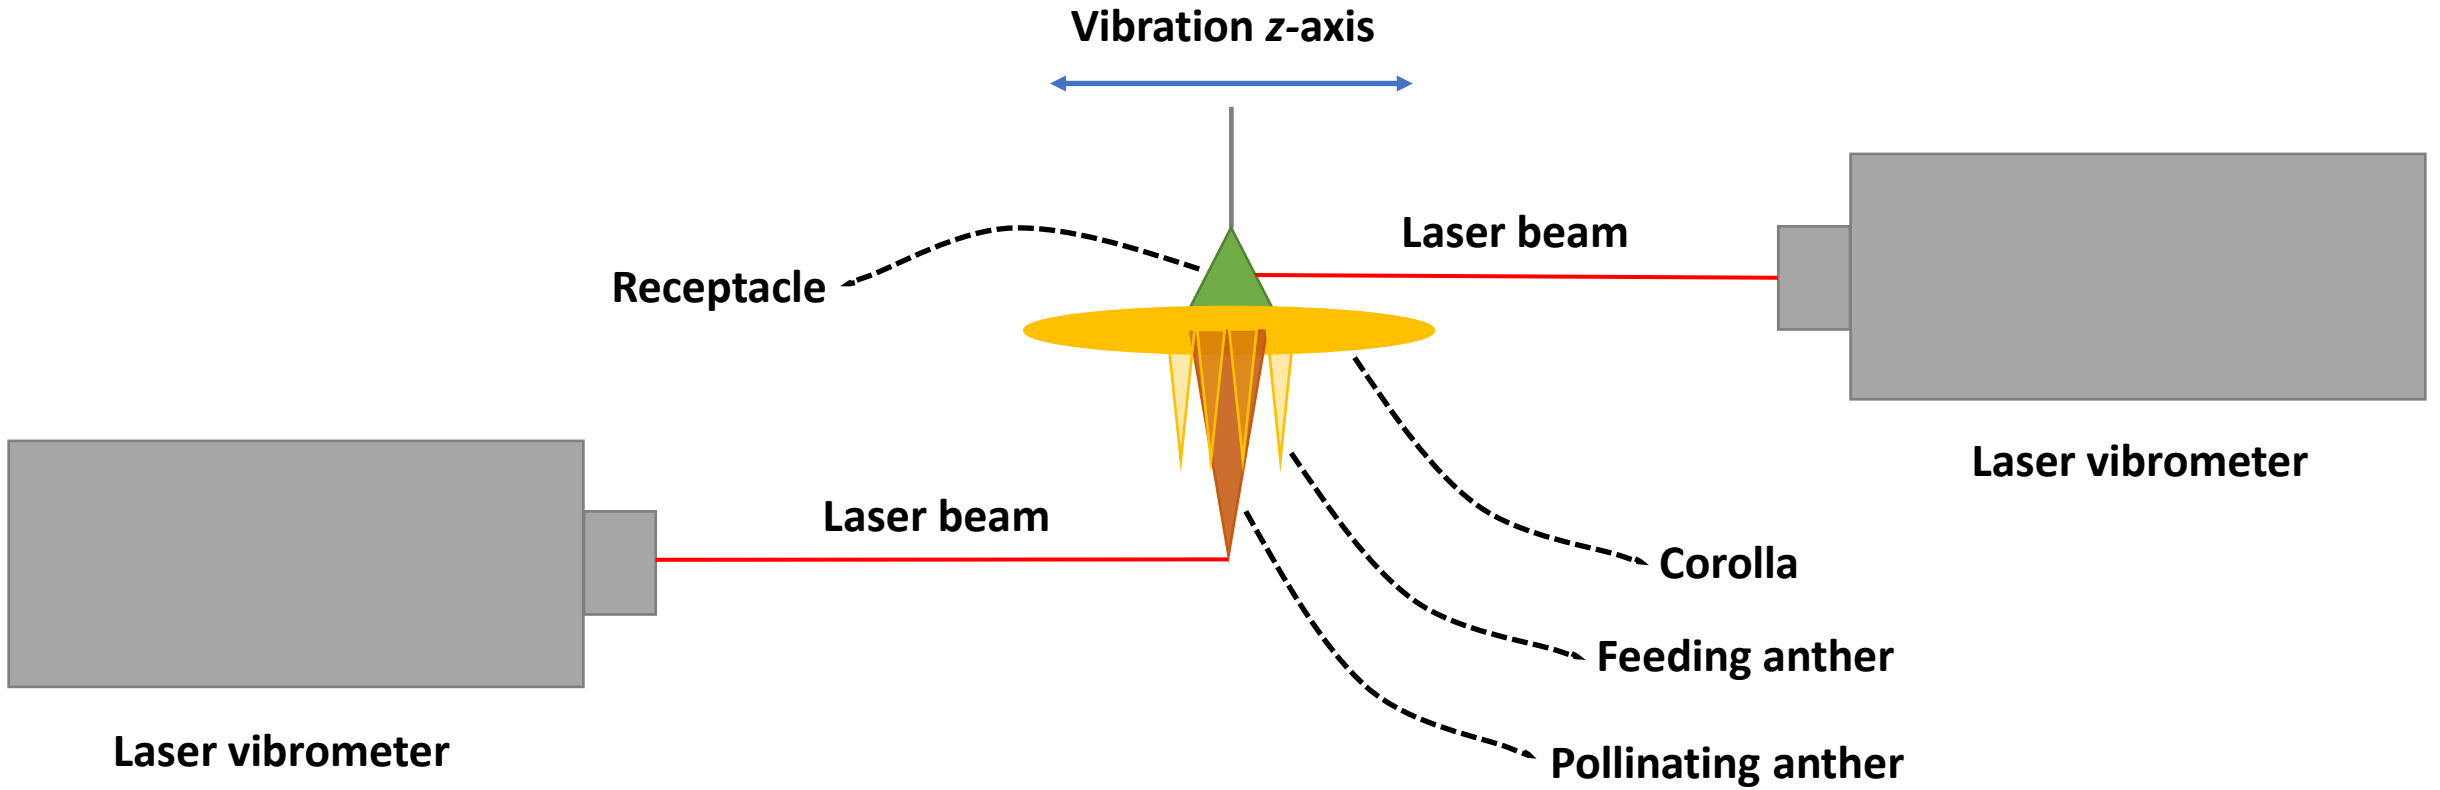

Supplement: rsos201010supp1.pdf [file rsos201010supp1.pdf]
